# Supplementary material for: E2F/Dp inactivation in fat body cells triggers systemic metabolic changes
Source: eLife. 2021 Jul 12;10:e67753. doi: 10.7554/eLife.67753 (PMC8298092; doi:10.7554/eLife.67753)
Supplement: Figure 1—source data 1. [file elife-67753-fig1-data1.xlsx]

## Sheet: Title
﻿This table includes the area measurements of the VL3 muscle (μm2) at the third instar larva and the statistical analysis

## Sheet: Raw Data
VL3 muscle area (μm2)
Experiment	Genotype	CG>RFP	CG>Dp-RNAi	Mef2>RFP	Mef2>Dp-RNAi
1	Animal 1	44199.2	46627.1	33367.8	33375.5
1	Animal 2	41913.5	39333.9	35745.1	22475.5
1	Animal 3	39286.7	43251.8		28547.9
1	Animal 4	41506.3			33114
1	Animal 5				31964.3
2	Animal 1	41268	46627.9	38099.3	33419.2
2	Animal 2	35097		38304.2	27352
2	Animal 3	41953.8		37255.7	27848.3
2	Animal 4	37053.4		40159.5
3	Animal 1	45360.8	47175.8		28193.8
3	Animal 2	42742.6	42599.4	43058.1	29529.5
3	Animal 3	39008.1	43164.4	42166.4	34870.7
3	Animal 4	43557	46452.2	35211	36911.1
3	Animal 5		41206.2

## Sheet: Statistics
Anova Results			Multiple comparisons						Descriptive statistics
Table Analyzed	All Exp		Number of families	1						CG>RFP	CG>Dp-RNAi	Mef2>RFP	Mef2>Dp-RNAi
			Number of comparisons per family	6					Number of values	12	9	9	12
Kruskal-Wallis test			Alpha	0.05
P value	<0.0001								Minimum	35097	39334	33368	22476
Exact or approximate P value?	Approximate		Dunn's multiple comparisons test	Mean rank diff.	Significant?	Summary	Adjusted P Value		25% Percentile	39078	41903	35478	27935
P value summary	****		CG>RFP vs. CG>Dp-RNAi	-7.278	No	ns	>0.9999		Median	41710	43252	38099	30747
Do the medians vary signif. (P < 0.05)?	Yes		CG>RFP vs. Mef2>RFP	6.944	No	ns	>0.9999		75% Percentile	43353	46628	41163	33408
Number of groups	4		CG>RFP vs. Mef2>Dp-RNAi	20.08	Yes	***	0.0004		Maximum	45361	47176	43058	36911
Kruskal-Wallis statistic	29.25		CG>Dp-RNAi vs. Mef2>RFP	14.22	No	ns	0.0835
			CG>Dp-RNAi vs. Mef2>Dp-RNAi	27.36	Yes	****	<0.0001		Mean	41079	44049	38152	30633
Data summary			Mef2>RFP vs. Mef2>Dp-RNAi	13.14	No	ns	0.0909		Std. Deviation	2987	2799	3209	4013
Number of treatments (columns)	4								Std. Error of Mean	862.3	933.1	1070	1159
Number of values (total)	42		Test details	Mean rank 1	Mean rank 2	Mean rank diff.	n1
			CG>RFP vs. CG>Dp-RNAi	27.17	34.44	-7.278	12		Lower 95% CI	39181	41897	35685	28084
			CG>RFP vs. Mef2>RFP	27.17	20.22	6.944	12		Upper 95% CI	42977	46200	40618	33183
			CG>RFP vs. Mef2>Dp-RNAi	27.17	7.083	20.08	12
			CG>Dp-RNAi vs. Mef2>RFP	34.44	20.22	14.22	9		Mean ranks	27.17	34.44	20.22	7.083
			CG>Dp-RNAi vs. Mef2>Dp-RNAi	34.44	7.083	27.36	9
			Mef2>RFP vs. Mef2>Dp-RNAi	20.22	7.083	13.14	9
