# Supplementary material for: E2F/Dp inactivation in fat body cells triggers systemic metabolic changes
Source: eLife. 2021 Jul 12;10:e67753. doi: 10.7554/eLife.67753 (PMC8298092; doi:10.7554/eLife.67753)
Supplement: Figure 4—source data 1. [file elife-67753-fig4-data1.xlsx]

## Sheet: Title
This table includes the area measurements of the VL3 muscles at the third instar larva and the statistical analysis.

## Sheet: Raw Data
VL3 muscle area (μm2)
Experiment	Genotype	Dp -/+	Dp -/-	Dp -/- ; CG>Dp	Dp -/- ; Mef2>Dp
1	Animal 1	35692.1	31618.5	31337.6	40871.4
1	Animal 2	53633.6	25387.7	35589	45462.6
1	Animal 3	40006.6	23293.5	26576	48085.8
1	Animal 4	34989.5	29820	29223	49492
1	Animal 5	55184.8	34882.2	41776.4	42185
1	Animal 6	43205.5	32687.3	33168	43354.6
1	Animal 7	44388.9	32091.9	35278.6	46407.7
1	Animal 8	40983.6	21910.3
2	Animal 1	41753.4	34392.4	32497.3	31778.2
2	Animal 2	53623.8	35780.6	26876.6	44629.7
2	Animal 3	49450.3	32353.1	32404.7	43356.2
2	Animal 4	56477.1		31022.3	44069.5
2	Animal 5	42363.6		31437.5	44342.3
2	Animal 6	45717.3		27756.2	36892
2	Animal 7	41783.7		37529.9	48237.3
2	Animal 8			32400.6	32277.8
2	Animal 9			35134.4

## Sheet: Statistics
Anova Results			Multiple comparisons						Descriptive statistics
Table Analyzed	Exp1+2		Number of families	1						Dp -/+	Dp -/-	Dp -/- ; CG>Dp	Dp -/- ; Mef2>Dp
			Number of comparisons per family	3					Number of values	15	11	16	15
Kruskal-Wallis test			Alpha	0.05
P value	<0.0001								Minimum	34989	21910	26576	31778
Exact or approximate P value?	Approximate		Dunn's multiple comparisons test	Mean rank diff.	Significant?	Summary	Adjusted P Value		25% Percentile	40984	25388	29673	40871
P value summary	****		Dp -/+ vs. Dp -/-	28.76	Yes	****	<0.0001		Median	43206	32092	32403	44070
Do the medians vary signif. (P < 0.05)?	Yes		Dp -/+ vs. Dp -/- ; CG>Dp	25.4	Yes	****	<0.0001		75% Percentile	53624	34392	35243	46408
Number of groups	4		Dp -/+ vs. Dp -/- ; Mef2>Dp	2.733	No	ns	>0.9999		Maximum	56477	35781	41776	49492
Kruskal-Wallis statistic	33.76
			Test details	Mean rank 1	Mean rank 2	Mean rank diff.	n1		Mean	45284	30383	32501	42763
Data summary			Dp -/+ vs. Dp -/-	42.4	13.64	28.76	15		Std. Deviation	6881	4758	4005	5355
Number of treatments (columns)	4		Dp -/+ vs. Dp -/- ; CG>Dp	42.4	17	25.4	15		Std. Error of Mean	1777	1435	1001	1383
Number of values (total)	57		Dp -/+ vs. Dp -/- ; Mef2>Dp	42.4	39.67	2.733	15
									Lower 95% CI	41473	27187	30366	39797
									Upper 95% CI	49094	33580	34635	45729
									Mean ranks	42.4	13.64	17	39.67
