# Supplementary material for: E2F/Dp inactivation in fat body cells triggers systemic metabolic changes
Source: eLife. 2021 Jul 12;10:e67753. doi: 10.7554/eLife.67753 (PMC8298092; doi:10.7554/eLife.67753)
Supplement: Figure 6—source data 1. [file elife-67753-fig6-data1.xlsx]

## Sheet: Title
This table includes the measurements of circulating trehalose levels and the statistical analysis.

## Sheet: Raw Data
Circulating trehalose levels
	Genotype	cg>mCherry-RNAi	cg>mCherry-RNAi	cg>mCherry-RNAi	cg>mCherry-RNAi	cg>mCherry-RNAi	cg>mCherry-RNAi	cg>Dp-RNAi	cg>Dp-RNAi	cg>Dp-RNAi	cg>Dp-RNAi	cg>Dp-RNAi	cg>Dp-RNAi
Diet		Sample 1	Sample 2	Sample 3	Sample 4	Sample 5	Sample 6	Sample 1	Sample 2	Sample 3	Sample 4	Sample 5	Sample 6
	OR	20.575	23.9572	25.0846	27.3393	24.5209	19.4476	9.30101	16.6291	18.8839	20.575	16.0654	20.0113
	HS	26.7756	29.0304	27.903	29.0304	26.212	27.903	24.5209	25.0846	25.6483	23.3935	24.5209	27.903

## Sheet: Statistics
Anova Results							Multiple comparisons						Descriptive statistics
Table Analyzed	CG - OR & HS exp4 - twoWayANOVA						Compare cell means regardless of rows and columns						Means	cg>mCherry-RNAi	cg>Dp-RNAi	Row means
													OR	23.49	16.91	20.2
Two-way ANOVA	Ordinary						Number of families	1					HS	27.81	25.18	26.49
Alpha	0.05						Number of comparisons per family	6					Column means	25.65	21.04	23.35
							Alpha	0.05
Source of Variation	% of total variation	P value	P value summary	Significant?
Interaction	4.36	0.0903	ns	No			Tukey's multiple comparisons test	Mean Diff.	95.00% CI of diff.	Summary	Adjusted P Value
Food	44.38	<0.0001	****	Yes
Genotype	23.74	0.0005	***	Yes			OR:cg>mCherry-RNAi vs. OR:cg>Dp-RNAi	6.576	2.189 to 10.96	**	0.0023
							OR:cg>mCherry-RNAi vs. HS:cg>mCherry-RNAi	-4.322	-8.709 to 0.06587	ns	0.0545
ANOVA table	SS	DF	MS	F (DFn, DFd)	P value		OR:cg>mCherry-RNAi vs. HS:cg>Dp-RNAi	-1.691	-6.079 to 2.696	ns	0.706
Interaction	23.36	1	23.36	F (1, 20) = 3.168	P=0.0903		OR:cg>Dp-RNAi vs. HS:cg>mCherry-RNAi	-10.9	-15.29 to -6.511	****	<0.0001
Food	237.7	1	237.7	F (1, 20) = 32.25	P<0.0001		OR:cg>Dp-RNAi vs. HS:cg>Dp-RNAi	-8.268	-12.66 to -3.880	***	0.0002
Genotype	127.2	1	127.2	F (1, 20) = 17.25	P=0.0005		HS:cg>mCherry-RNAi vs. HS:cg>Dp-RNAi	2.631	-1.757 to 7.018	ns	0.3606
Residual	147.4	20	7.372
Difference between column means
Mean of cg>mCherry-RNAi	25.65
Mean of cg>Dp-RNAi	21.04
Difference between means	4.604
SE of difference	1.108
95% CI of difference	2.291 to 6.916
Difference between row means
Mean of OR	20.2
Mean of HS	26.49
Difference between means	-6.295
SE of difference	1.108
95% CI of difference	-8.607 to -3.982
Interaction CI
Mean diff, A1 - B1	6.576
Mean diff, A2 - B2	2.631
(A1 -B1) - (A2 - B2)	3.946
95% CI of difference	-0.6785 to 8.570
(B1 - A1) - (B2 - A2)	-3.946
95% CI of difference	-8.570 to 0.6785
