# Supplementary material for: E2F/Dp inactivation in fat body cells triggers systemic metabolic changes
Source: eLife journal article supplement (doi:10.7554/elife.67753), 2021-07-12
Supplement: supp [file elife_poa_e67753_Figure_6_source_data_2.xlsx]

## Sheet: Title
This table includes the measurements of triglycerides levels normalized to protein content and the statistical analysis.

## Sheet: Raw Data
microg triglycerides levels normalized to mg protein content
	Genotype	cg>mCherry-RNAi	cg>mCherry-RNAi	cg>mCherry-RNAi	cg>mCherry-RNAi	cg>mCherry-RNAi	cg>mCherry-RNAi	cg>Dp-RNAi	cg>Dp-RNAi	cg>Dp-RNAi	cg>Dp-RNAi	cg>Dp-RNAi	cg>Dp-RNAi
Diet		Sample 1	Sample 2	Sample 3	Sample 4	Sample 5	Sample 6	Sample 1	Sample 2	Sample 3	Sample 4	Sample 5	Sample 6
	OR	115.8	115.2	168.7	214.5	133.1	141.7	65.4	48	87.3	64.3	81.3	77
	HS		176.8	150.4	289.1	137.4	154.9	130.6	181.9	90.8	102.2	210.2	137.2

## Sheet: Statistics
Anova Results							Multiple comparisons						Descriptive statistics
Table Analyzed	TAG - Exp14-CG						Compare cell means regardless of rows and columns						Predicted means (LS means)	cg>mCherry-RNAi	cg>Dp-RNAi	Row means
													OR	148.2	70.55	109.4
Two-way ANOVA	Ordinary						Number of families	1					HS	181.7	142.2	161.9
Alpha	0.05						Number of comparisons per family	6					Column means	164.9	106.4	135.6
							Alpha	0.05
Source of Variation	% of total variation	P value	P value summary	Significant?
Interaction	2.904	0.2962	ns	No			Tukey's multiple comparisons test	Predicted (LS) mean diff.	95.00% CI of diff.	Summary	Adjusted P Value
food	22.19	0.0079	**	Yes
genotype	27.55	0.0037	**	Yes			OR:cg>mCherry-RNAi vs. OR:cg>Dp-RNAi	77.62	8.884 to 146.3	*	0.0236
							OR:cg>mCherry-RNAi vs. HS:cg>mCherry-RNAi	-33.55	-105.6 to 38.53	ns	0.5688
ANOVA table	SS (Type III)	DF	MS	F (DFn, DFd)	P value		OR:cg>mCherry-RNAi vs. HS:cg>Dp-RNAi	6.017	-62.72 to 74.75	ns	0.9946
Interaction	2068	1	2068	F (1, 19) = 1.154	P=0.2962		OR:cg>Dp-RNAi vs. HS:cg>mCherry-RNAi	-111.2	-183.3 to -39.08	**	0.0019
food	15796	1	15796	F (1, 19) = 8.812	P=0.0079		OR:cg>Dp-RNAi vs. HS:cg>Dp-RNAi	-71.6	-140.3 to -2.868	*	0.0394
genotype	19618	1	19618	F (1, 19) = 10.94	P=0.0037		HS:cg>mCherry-RNAi vs. HS:cg>Dp-RNAi	39.57	-32.52 to 111.7	ns	0.4327
Residual	34058	19	1793
Difference between column means
Predicted (LS) mean of cg>mCherry-RNAi	164.9
Predicted (LS) mean of cg>Dp-RNAi	106.4
Difference between predicted means	58.59
SE of difference	17.71
95% CI of difference	21.52 to 95.66
Difference between row means
Predicted (LS) mean of OR	109.4
Predicted (LS) mean of HS	161.9
Difference between predicted means	-52.58
SE of difference	17.71
95% CI of difference	-89.65 to -15.51
Interaction CI
Mean diff, A1 - B1	77.62
Mean diff, A2 - B2	39.57
(A1 -B1) - (A2 - B2)	38.05
95% CI of difference	-36.09 to 112.2
(B1 - A1) - (B2 - A2)	-38.05
95% CI of difference	-112.2 to 36.09
