# Supplementary material for: E2F/Dp inactivation in fat body cells triggers systemic metabolic changes
Source: eLife journal article supplement (doi:10.7554/elife.67753), 2021-07-12
Supplement: supp [file elife_poa_e67753_Figure_6_source_data_3.xlsx]

## Sheet: Title
This table includes the average values of the lipid droplet size measured for each image and the statistical analysis.

## Sheet: Raw Data
Average values of lipid droplet size per image
	Genotype	cg>mCherry-RNAi	cg>mCherry-RNAi	cg>mCherry-RNAi	cg>mCherry-RNAi	cg>mCherry-RNAi	cg>mCherry-RNAi	cg>mCherry-RNAi	cg>mCherry-RNAi	cg>mCherry-RNAi	cg>mCherry-RNAi	cg>mCherry-RNAi	cg>mCherry-RNAi	cg>mCherry-RNAi	cg>Dp-RNAi	cg>Dp-RNAi	cg>Dp-RNAi	cg>Dp-RNAi	cg>Dp-RNAi	cg>Dp-RNAi	cg>Dp-RNAi	cg>Dp-RNAi	cg>Dp-RNAi	cg>Dp-RNAi	cg>Dp-RNAi	cg>Dp-RNAi	cg>Dp-RNAi	cg>Dp-RNAi	cg>Dp-RNAi	cg>Dp-RNAi	cg>Dp-RNAi
Diet		Image 1	Image 2	Image 3	Image 4	Image 5	Image 6	Image 7	Image 8	Image 9	Image 10	Image 11	Image 12	Image 13	Image 1	Image 2	Image 3	Image 4	Image 5	Image 6	Image 7	Image 8	Image 9	Image 10	Image 11	Image 12	Image 13	Image 14	Image 15	Image 16	Image 17
	OR	27.8	19.093	32.805	21.164	29.947	41.07		23.351	30.958	37.517	32.972	18.227	27.243	11.052	14.824	9.162	16.833	13.192	12.598	13.586	13.718	11.712	13.092	18.523	10.155	10.71	12.798	9.277	11.568	11.924
	HS	26.105	30.696	68.673	38.143	40.213	42.667	25.604	31.38	42.968	57.456				19.02	40.447	36.802	27.084	24.901	30.067	29.83	30.902	24.321	25.993	35.786	15.934	32.444	45.815	32.869	36.76	33.165

## Sheet: Statistics
Anova Results							Multiple comparisons
Table Analyzed	Average size- Exp16A-2way						Compare cell means regardless of rows and columns
Two-way ANOVA	Ordinary						Number of families	1
Alpha	0.05						Number of comparisons per family	6
							Alpha	0.05
Source of Variation	% of total variation	P value	P value summary	Significant?
Interaction	1.451	0.1597	ns	No			Tukey's multiple comparisons test	Predicted (LS) mean diff.	95.00% CI of diff.	Summary	Adjusted P Value
food type	33.82	<0.0001	****	Yes
Genotype	24.61	<0.0001	****	Yes			OR:cg>mCherry-RNAi vs. OR:cg>Dp-RNAi	15.88	7.948 to 23.82	****	<0.0001
							OR:cg>mCherry-RNAi vs. HS:cg>mCherry-RNAi	-11.88	-20.89 to -2.868	**	0.0052
ANOVA table	SS (Type III)	DF	MS	F (DFn, DFd)	P value		OR:cg>mCherry-RNAi vs. HS:cg>Dp-RNAi	-2.202	-10.14 to 5.732	ns	0.8819
Interaction	127.9	1	127.9	F (1, 52) = 2.035	P=0.1597		OR:cg>Dp-RNAi vs. HS:cg>mCherry-RNAi	-27.76	-36.15 to -19.37	****	<0.0001
food type	2983	1	2983	F (1, 52) = 47.45	P<0.0001		OR:cg>Dp-RNAi vs. HS:cg>Dp-RNAi	-18.08	-25.30 to -10.87	****	<0.0001
Genotype	2170	1	2170	F (1, 52) = 34.53	P<0.0001		HS:cg>mCherry-RNAi vs. HS:cg>Dp-RNAi	9.676	1.290 to 18.06	*	0.0177
Residual	3269	52	62.86
Difference between column means
Predicted (LS) mean of cg>mCherry-RNAi	34.45
Predicted (LS) mean of cg>Dp-RNAi	21.67
Difference between predicted means	12.78
SE of difference	2.175
95% CI of difference	8.415 to 17.14
Difference between row means
Predicted (LS) mean of OR	20.57
Predicted (LS) mean of HS	35.55
Difference between predicted means	-14.98
SE of difference	2.175
95% CI of difference	-19.34 to -10.62
Interaction CI
Mean diff, A1 - B1	15.88
Mean diff, A2 - B2	9.676
(A1 -B1) - (A2 - B2)	6.205
95% CI of difference	-2.523 to 14.93
(B1 - A1) - (B2 - A2)	-6.205
95% CI of difference	-14.93 to 2.523
