# Supplementary material for: E2F/Dp inactivation in fat body cells triggers systemic metabolic changes
Source: eLife. 2021 Jul 12;10:e67753. doi: 10.7554/eLife.67753 (PMC8298092; doi:10.7554/eLife.67753)
Supplement: Supplementary file 1. — Third instar larval w1118 and Dp-/- were collected. Fat body was dissected in three replicates for each genotype. Mef2>mCherry-RNAi and Mef2>Dp-RNAi were collected at pharate stage. Thoracic muscles were dissected in four replicates for each genotype. [file elife-67753-supp1.xls]

## Sheet: Legend
Proteins identified and quantified by TMT-MS
Normalized intensities for 6580 proteins in fat body and 5730 in muscles
Third instar larval W1118 and Dp-/- were collected. Fat body were dissected in three replicates for each genotype
Mef2>mCherry-RNAi and Mef2>Dp-RNAi were collected at pharate stage. Thoracic muscles were dissected in four replicates for each genotype

## Sheet: Fat Body
Reference	Uniprot_Entry	Uniprot_GeneName	GeneName	Protein_Description	w[1118] Rep_1	Dp-/- Rep_1	w[1118] Rep_2	Dp-/- Rep_2	w[1118] Rep_3	Dp-/- Rep_3
sp|A1A708|Y4951_DROME	A1A708	Y4951_DROME	CG4951	Uncharacterized protein CG4951	357734	952838	550258	927471	621111	984299
sp|A1Z6E0|GUS_DROME	A1Z6E0	GUS_DROME	gus	Protein gustavus	784024	709307	677966	723915	817296	716436
sp|A1Z6K7|EI3F2_DROME	A1Z6K7	EI3F2_DROME	eIF3-S5-2	Eukaryotic translation initiation factor 3 subunit F-2	803430	714607	1.14961e+06	550849	805953	450603
sp|A1Z6L1|TO402_DROME	A1Z6L1	TO402_DROME	tomboy40	Mitochondrial import receptor subunit TOM40 homolog 2	892361	872420	492844	788655	573704	820043
sp|A1Z746|KMO_DROME	A1Z746	KMO_DROME	cn	Kynurenine 3-monooxygenase	362660	1.05466e+06	385425	1.39038e+06	331066	913300
sp|A1Z7G7|LPHN_DROME	A1Z7G7	LPHN_DROME	Cirl	Latrophilin Cirl	475361	763910	559484	833778	993657	770796
sp|A1Z7T0-2|PKN_DROME	A1Z7T0-2	PKN_DROME	Pkn	Isoform 2 of Serine/threonine-protein kinase N	727353	668585	831605	663919	851637	684960
sp|A1Z8J0|C19L1_DROME	A1Z8J0	C19L1_DROME	CG7741	CWF19-like protein 1 homolog	540098	864411	660337	822829	656599	869003
sp|A1Z8N1|TRE11_DROME	A1Z8N1	TRE11_DROME	Tret1-1	Facilitated trehalose transporter Tret1-1	727503	795865	754544	943502	612414	629834
sp|A1Z8P9|TPR_DROME	A1Z8P9	TPR_DROME	Mtor	Nucleoprotein TPR	650009	768677	669157	741288	812051	775393
sp|A1Z9A2|U587_DROME	A1Z9A2	U587_DROME	CG4646	UPF0587 protein CG4646	957762	598950	827635	738201	730267	605557
sp|A1Z9A8|PTCD3_DROME	A1Z9A8	PTCD3_DROME	CG4679	Protein PTCD3 homolog, mitochondrial	824474	799803	751466	762709	564959	745885
sp|A1Z9E2|LIN54_DROME	A1Z9E2	LIN54_DROME	mip120	Protein lin-54 homolog	769300	278180	1.0423e+06	309882	1.42655e+06	562316
sp|A1Z9P3|SHRM_DROME	A1Z9P3	SHRM_DROME	Shroom	Protein Shroom	697798	757167	628822	797993	760948	779265
sp|A1ZA47|ZASP_DROME	A1ZA47	ZASP_DROME	Zasp52	PDZ and LIM domain protein Zasp	487017	1.31281e+06	530073	924324	671313	551942
sp|A1ZA47-2|ZASP_DROME	A1ZA47-2	ZASP_DROME	Zasp52	Isoform A of PDZ and LIM domain protein Zasp	577696	744710	664400	710632	1.01094e+06	700920
sp|A1ZA47-4|ZASP_DROME	A1ZA47-4	ZASP_DROME	Zasp52	Isoform E of PDZ and LIM domain protein Zasp	360308	3.15655e+06	294026	267427	295647	228817
sp|A1ZA92|NOL9_DROME	A1ZA92	NOL9_DROME	CG8414	Polynucleotide 5'-hydroxyl-kinase NOL9	625484	920349	554602	807588	542577	960613
sp|A1ZAB5|CLU_DROME	A1ZAB5	CLU_DROME	clu	Protein clueless	699705	884793	701051	786429	480560	879284
sp|A1ZAI3|FACR2_DROME	A1ZAI3	FACR2_DROME	CG8303	Putative fatty acyl-CoA reductase CG8303	477312	1.20443e+06	485525	481425	771892	969286
sp|A1ZAI5|FACR1_DROME	A1ZAI5	FACR1_DROME	CG5065	Putative fatty acyl-CoA reductase CG5065	732124	717753	1.08802e+06	620277	843513	465917
sp|A1ZAJ2|KIF1A_DROME	A1ZAJ2	KIF1A_DROME	unc-104	Kinesin-like protein unc-104	664953	675206	660213	762756	902853	746180
sp|A1ZAU8|SSP4_DROME	A1ZAU8	SSP4_DROME	ssp4	Short spindle protein 4	686164	504853	870228	647103	943206	751538
sp|A1ZAX1|EIF3C_DROME	A1ZAX1	EIF3C_DROME	eIF3-S8	Eukaryotic translation initiation factor 3 subunit C	898436	787190	849565	586894	723610	613477
sp|A1ZB86|KLD10_DROME	A1ZB86	KLD10_DROME	slim	Kelch domain-containing protein 10 homolog	768347	778437	837282	762948	678486	631528
sp|A1ZB91|DAAF3_DROME	A1ZB91	DAAF3_DROME	CG17669	Dynein assembly factor 3, axonemal homolog	889483	655450	1.04466e+06	652760	823583	415775
sp|A1ZBE8|DOP1_DROME	A1ZBE8	DOP1_DROME	CG15099	Protein dopey-1 homolog	820930	652024	866828	732009	687858	685446
sp|A1ZBT5|MED8_DROME	A1ZBT5	MED8_DROME	MED8	Mediator of RNA polymerase II transcription subunit 8	615629	738481	736750	671274	913537	736490
sp|A1ZBW7|FAM21_DROME	A1ZBW7	FAM21_DROME	CG16742	WASH complex subunit FAM21 homolog	682448	575767	819103	779141	687328	864443
sp|A2VEI2-2|MICU1_DROME	A2VEI2-2	MICU1_DROME	CG4495	Isoform A of Calcium uptake protein 1 homolog, mitochondrial	601992	787004	632264	882742	714526	801929
sp|A8DYE2|TRPCG_DROME	A8DYE2	TRPCG_DROME	Trpm	Transient receptor potential cation channel trpm	721960	706276	711379	714973	785235	778908
sp|A8DYH2|UFM1_DROME	A8DYH2	UFM1_DROME	CG34191	Ubiquitin-fold modifier 1	1.02781e+06	387131	954786	584453	956351	536071
sp|A8DYY5|RPAP2_DROME	A8DYY5	RPAP2_DROME	CG34183	Putative RNA polymerase II subunit B1 CTD phosphatase RPAP2 homolog	732963	536108	959448	579813	924464	685084
sp|A8JNV4|BL1S3_DROME	A8JNV4	BL1S3_DROME	blos3	Biogenesis of lysosome-related organelles complex 1 subunit 3	838682	606638	796508	716832	835285	644880
sp|A8JUV0|SBNO_DROME	A8JUV0	SBNO_DROME	sno	Protein strawberry notch	744608	638518	980049	615427	839659	621186
sp|A8MPH9|FOSLD_DROME	A8MPH9	FOSLD_DROME	kay	Transcription factor kayak, isoforms D/sro	622858	460930	848250	712132	971287	778069
sp|B7Z073|SOSSC_DROME	B7Z073	SOSSC_DROME	CG42374	SOSS complex subunit C homolog	656995	564042	678056	707083	892573	886463
sp|C4NYP8|F10A1_DROME	C4NYP8	F10A1_DROME	HIP	Hsc70-interacting protein 1	830487	661446	908388	708242	717426	627019
sp|O01382|ICE_DROME	O01382	ICE_DROME	Ice	Caspase	876970	627273	767673	739833	729439	699225
sp|O01666|ATPG_DROME	O01666	ATPG_DROME	ATPsyn-gamma	ATP synthase subunit gamma, mitochondrial	966192	718234	773075	727655	581831	692285
sp|O01939|MST_DROME	O01939	MST_DROME	mst	Protein misato	330704	1.15297e+06	316518	988085	351275	1.2381e+06
sp|O02193|MOF_DROME	O02193	MOF_DROME	mof	Males-absent on the first protein	444968	1.03294e+06	482540	906802	640463	903067
sp|O02195|EIF3I_DROME	O02195	EIF3I_DROME	Trip1	Eukaryotic translation initiation factor 3 subunit I	883609	706172	828337	661985	706817	663196
sp|O02373|UGDH_DROME	O02373	UGDH_DROME	sgl	UDP-glucose 6-dehydrogenase	572054	867402	493419	787227	684852	986436
sp|O02649|CH60_DROME	O02649	CH60_DROME	Hsp60	60 kDa heat shock protein, mitochondrial	784773	814898	687704	850947	493464	812054
sp|O15943|CADN_DROME	O15943	CADN_DROME	CadN	Neural-cadherin	637854	804113	479946	805222	899189	782661
sp|O15945|ARNT_DROME	O15945	ARNT_DROME	tgo	Aryl hydrocarbon receptor nuclear translocator homolog	730496	617793	694109	700584	911891	755072
sp|O16102|CHD3_DROME	O16102	CHD3_DROME	Chd3	Chromodomain-helicase-DNA-binding protein 3	348260	1.05376e+06	746870	794113	740400	742949
sp|O16129|SYFM_DROME	O16129	SYFM_DROME	Aats-phe	Probable phenylalanine--tRNA ligase, mitochondrial	989522	781852	620950	778200	496319	786302
sp|O16797|RL3_DROME	O16797	RL3_DROME	RpL3	60S ribosomal protein L3	950597	680973	750297	704265	651001	711305
sp|O16810|ORC1_DROME	O16810	ORC1_DROME	Orc1	Origin recognition complex subunit 1	619342	850815	622785	688467	879647	754104
sp|O17468|HIRA_DROME	O17468	HIRA_DROME	Hira	Protein HIRA homolog	750188	688795	693380	701599	842382	743910
sp|O18334|RAB6_DROME	O18334	RAB6_DROME	Rab6	Ras-related protein Rab6	827499	802620	722079	701277	795202	604988
sp|O18373|SPS1_DROME	O18373	SPS1_DROME	SelD	Selenide, water dikinase	641655	777376	766725	736638	820272	688182
sp|O18404|HCD2_DROME	O18404	HCD2_DROME	scu	3-hydroxyacyl-CoA dehydrogenase type-2	876182	609308	951481	785984	567888	668534
sp|O18405|SURF4_DROME	O18405	SURF4_DROME	Surf4	Surfeit locus protein 4 homolog	883271	559162	872020	664004	814267	647234
sp|O18408|AMYR_DROME	O18408	AMYR_DROME	Amyrel	Alpha-amylase-related protein	256663	1.18108e+06	197146	1.89581e+06	148023	798436
sp|O18413|PRS8_DROME	O18413	PRS8_DROME	Rpt6	26S protease regulatory subunit 8	810858	684875	834054	671445	741026	696407
sp|O44342|WBL_DROME	O44342	WBL_DROME	wbl	Protein windbeutel	516677	964030	573245	652650	1.0941e+06	618855
sp|O44386-2|ITA3_DROME	O44386-2	ITA3_DROME	scb	Isoform A of Integrin alpha-PS3	671181	849950	526658	848214	730993	796535
sp|O44437|SMD3_DROME	O44437	SMD3_DROME	SmD3	Small nuclear ribonucleoprotein Sm D3	904506	642687	786325	752227	762224	606975
sp|O46037|VINC_DROME	O46037	VINC_DROME	Vinc	Vinculin	810939	837895	657697	819159	533913	786382
sp|O46072|KZ_DROME	O46072	KZ_DROME	kz	Probable ATP-dependent RNA helicase kurz	643586	821533	687867	731717	684256	847165
sp|O46080|SMG9_DROME	O46080	SMG9_DROME	CG3857	Protein SMG9	552308	820930	846923	761658	627360	814700
sp|O46084|PGAM5_DROME	O46084	PGAM5_DROME	Pgam5	Serine/threonine-protein phosphatase Pgam5, mitochondrial	781768	697851	702052	747197	785547	716973
sp|O46106|NOI_DROME	O46106	NOI_DROME	noi	Splicing factor 3A subunit 3	704366	744069	703045	680341	828484	758391
sp|O46339|HTH_DROME	O46339	HTH_DROME	hth	Homeobox protein homothorax	641613	605935	603689	280272	1.20738e+06	997244
sp|O61305|DDX19_DROME	O61305	DDX19_DROME	Dbp80	DEAD-box helicase Dbp80	400071	1.00447e+06	519099	944622	564221	971172
sp|O61345|PEN_DROME	O61345	PEN_DROME	pen	Protein penguin	651911	828675	701036	749376	660709	829992
sp|O61443|MK14B_DROME	O61443	MK14B_DROME	p38b	Mitogen-activated protein kinase 14B	609955	840259	638766	810043	652948	863996
sp|O61491|FLOT1_DROME	O61491	FLOT1_DROME	Flo-1	Flotillin-1	671240	780878	719077	771765	748709	738014
sp|O61613|NMT_DROME	O61613	NMT_DROME	Nmt	Glycylpeptide N-tetradecanoyltransferase	832768	768555	761183	734297	656511	696018
sp|O61661|CHK1_DROME	O61661	CHK1_DROME	grp	Serine/threonine-protein kinase grp	677439	737192	688256	629124	989551	693193
sp|O62619|KPYK_DROME	O62619	KPYK_DROME	PyK	Pyruvate kinase	995077	567997	983797	619569	634578	656130
sp|O62621|COPB2_DROME	O62621	COPB2_DROME	beta'Cop	Coatomer subunit beta'	857672	760333	809347	640871	722542	659093
sp|O76206|RIFK_DROME	O76206	RIFK_DROME	anon-84Ea	Putative riboflavin kinase	808162	693583	849178	790194	521659	781109
sp|O76324|DCO_DROME	O76324	DCO_DROME	dco	Discs overgrown protein kinase	676694	742546	730683	730144	801405	741884
sp|O76454|PHS_DROME	O76454	PHS_DROME	Pcd	Pterin-4-alpha-carbinolamine dehydratase	1.0607e+06	681580	851473	591181	632524	646337
sp|O76464|NFT1_DROME	O76464	NFT1_DROME	NitFhit	Nitrilase and fragile histidine triad fusion protein NitFhit	972948	493206	1.18276e+06	480752	839511	494574
sp|O76511|TYSY_DROME	O76511	TYSY_DROME	Ts	Thymidylate synthase	453027	952773	579369	826851	702755	890388
sp|O76767|ERD2_DROME	O76767	ERD2_DROME	KdelR	ER lumen protein retaining receptor	588691	565619	812959	817338	981613	650899
sp|O76922|AUB_DROME	O76922	AUB_DROME	aub	Protein aubergine	673718	826181	1.01806e+06	713529	670638	564839
sp|O76924|ARI2_DROME	O76924	ARI2_DROME	ari-2	Protein ariadne-2	704190	780111	659210	792865	744681	748400
sp|O76932|PP4C_DROME	O76932	PP4C_DROME	Pp4-19C	Serine/threonine-protein phosphatase 4 catalytic subunit	710378	689732	867565	643379	798167	717573
sp|O77051|E2F2_DROME	O77051	E2F2_DROME	E2f2	Transcription factor E2F2	863957	440965	876015	532018	1.20676e+06	506354
sp|O77263|TRMB_DROME	O77263	TRMB_DROME	CG4045	tRNA (guanine-N(7)-)-methyltransferase	722470	724071	772175	741437	730478	740156
sp|O77264|RTCA_DROME	O77264	RTCA_DROME	CG4061	RNA 3'-terminal phosphate cyclase	1.20612e+06	445203	846845	599599	912499	460479
sp|O77277|TORS_DROME	O77277	TORS_DROME	Torsin	Torsin-like protein	855531	703503	695978	610936	754983	800040
sp|O77410|EIF3E_DROME	O77410	EIF3E_DROME	eIF3-S6	Eukaryotic translation initiation factor 3 subunit E	928840	658384	923232	556882	756006	627975
sp|O77475|CPESY_DROME	O77475	CPESY_DROME	CG4585	Ceramide phosphoethanolamine synthase	952710	687092	724131	765016	677802	650639
sp|O96539|ATE1_DROME	O96539	ATE1_DROME	Ate1	Arginyl-tRNA--protein transferase 1	812522	683367	967451	633097	698616	654189
sp|O96539-4|ATE1_DROME	O96539-4	ATE1_DROME	Ate1	Isoform C of Arginyl-tRNA--protein transferase 1	696412	750737	698995	754364	648787	866575
sp|O96553|C1TC_DROME	O96553	C1TC_DROME	pug	C-1-tetrahydrofolate synthase, cytoplasmic	1.23187e+06	544892	883102	721382	549755	558193
sp|O96651|TOP3B_DROME	O96651	TOP3B_DROME	Top3beta	DNA topoisomerase 3-beta	748229	719923	839887	677790	827572	628557
sp|O96827|EF1B_DROME	O96827	EF1B_DROME	Ef1beta	Probable elongation factor 1-beta	993742	632130	783977	752794	602071	691814
sp|O96838|FYV1_DROME	O96838	FYV1_DROME	fab1	Putative 1-phosphatidylinositol 3-phosphate 5-kinase	677659	712263	758198	734210	748657	788155
sp|O96863|CSK2C_DROME	O96863	CSK2C_DROME	CkIIbeta2	Casein kinase II subunit beta'	975067	350459	1.41278e+06	442810	885036	405224
sp|O97069|ASSY_DROME	O97069	ASSY_DROME	CG1315	Argininosuccinate synthase	302172	1.08245e+06	458303	1.13723e+06	281793	1.13755e+06
sp|O97125|HSP68_DROME	O97125	HSP68_DROME	Hsp68	Heat shock protein 68	815620	774461	806732	810542	595252	658657
sp|O97172|U729_DROME	O97172	U729_DROME	CG18508	UPF0729 protein CG18508	691720	732710	933258	710956	779809	601110
sp|O97176|ESM1_DROME	O97176	ESM1_DROME	Kaz-m1	Enhancer of split M1 protein	629875	379067	673456	679078	1.09573e+06	902136
sp|O97422|B3GI_DROME	O97422	B3GI_DROME	GlcAT-I	Galactosylgalactosylxylosylprotein 3-beta-glucuronosyltransferase I	880270	624851	663201	672675	918629	669310
sp|O97477|INO1_DROME	O97477	INO1_DROME	Inos	Inositol-3-phosphate synthase	647897	1.20377e+06	307568	1.25575e+06	262054	798052
sp|P00334|ADH_DROME	P00334	ADH_DROME	Adh	Alcohol dehydrogenase	1.41929e+06	486145	782685	729811	512343	565447
sp|P00399|COX1_DROME	P00399	COX1_DROME	mt:CoI	Cytochrome c oxidase subunit 1	755405	803238	753816	824160	605367	708698
sp|P00408|COX2_DROME	P00408	COX2_DROME	mt:CoII	Cytochrome c oxidase subunit 2	1.00673e+06	709920	765189	708511	613066	659740
sp|P00417|COX3_DROME	P00417	COX3_DROME	mt:CoIII	Cytochrome c oxidase subunit 3	934628	585441	869460	654964	850557	559260
sp|P00967|PUR2_DROME	P00967	PUR2_DROME	ade3	Trifunctional purine biosynthetic protein adenosine-3	919279	736116	439759	944330	563332	834352
sp|P02255|H1_DROME	P02255	H1_DROME	His1	Histone H1	787171	447588	1.13946e+06	521127	1.02202e+06	519724
sp|P02283|H2B_DROME	P02283	H2B_DROME	His2B	Histone H2B	706299	655389	669181	759236	973177	658777
sp|P02515|HSP22_DROME	P02515	HSP22_DROME	Hsp22	Heat shock protein 22	607060	980647	454971	964036	458611	956134
sp|P02517|HSP26_DROME	P02517	HSP26_DROME	Hsp26	Heat shock protein 26	593419	860299	836038	826613	678810	654832
sp|P02518|HSP27_DROME	P02518	HSP27_DROME	Hsp27	Heat shock protein 27	619672	716143	700290	835934	871402	682610
sp|P02572|ACT2_DROME	P02572	ACT2_DROME	Act42A	Actin-42A	611309	905448	546993	952555	709956	713766
sp|P02825|HSP71_DROME	P02825	HSP71_DROME	Hsp70Ab	Major heat shock 70 kDa protein Ab	297073	1.12468e+06	280346	1.30606e+06	268665	1.12788e+06
sp|P02839|LCP1_DROME	P02839	LCP1_DROME	Lcp1	Larval cuticle protein 1	856877	711430	520884	982870	776184	607651
sp|P02840|SGS3_DROME	P02840	SGS3_DROME	Sgs3	Salivary glue protein Sgs-3	790503	520236	503599	574212	1.69436e+06	331845
sp|P02841|SGS7_DROME	P02841	SGS7_DROME	Sgs7	Salivary glue protein Sgs-7	681618	328662	710917	369520	1.99153e+06	302132
sp|P02842|SGS8_DROME	P02842	SGS8_DROME	Sgs8	Salivary glue protein Sgs-8	550107	265924	614825	285693	2.36013e+06	274524
sp|P02843|VIT1_DROME	P02843	VIT1_DROME	Yp1	Vitellogenin-1	716811	1.54748e+06	579137	944209	401090	358708
sp|P02844|VIT2_DROME	P02844	VIT2_DROME	Yp2	Vitellogenin-2	98022.2	3.56467e+06	130571	644837	95644	111635
sp|P04052|RPB1_DROME	P04052	RPB1_DROME	RpII215	DNA-directed RNA polymerase II subunit RPB1	724571	692252	749055	693920	901431	666554
sp|P04197|MYB_DROME	P04197	MYB_DROME	Myb	Myb protein	656056	502031	723568	724318	1.02913e+06	759025
sp|P04359|RL32_DROME	P04359	RL32_DROME	RpL32	60S ribosomal protein L32	969978	594642	836176	693899	709470	648463
sp|P04388|RAS2_DROME	P04388	RAS2_DROME	Ras64B	Ras-like protein 2	558706	887829	722673	761277	750086	746555
sp|P04814|TRYA_DROME	P04814	TRYA_DROME	alphaTry	Trypsin alpha	992197	502191	388026	421086	1.27378e+06	797539
sp|P05205|HP1_DROME	P05205	HP1_DROME	Su(var)205	Heterochromatin protein 1	674025	619374	651257	649661	981564	815480
sp|P05389|RLA2_DROME	P05389	RLA2_DROME	RpLP2	60S acidic ribosomal protein P2	900619	378927	1.0298e+06	633113	813057	675345
sp|P05552|ADF1_DROME	P05552	ADF1_DROME	Adf1	Transcription factor Adf-1	598643	511951	785458	611702	1.25038e+06	635852
sp|P05661-10|MYSA_DROME	P05661-10	MYSA_DROME	Mhc	Isoform 11b of Myosin heavy chain, muscle	552384	933734	403703	1.43725e+06	263803	864217
sp|P05661-18|MYSA_DROME	P05661-18	MYSA_DROME	Mhc	Isoform E of Myosin heavy chain, muscle	538634	939417	333901	1.41025e+06	302872	917042
sp|P05812|HSP6A_DROME	P05812	HSP6A_DROME	Hsp67Ba	Heat shock protein 67B1	317713	821468	371837	1.01378e+06	962799	889506
sp|P05990|PYR1_DROME	P05990	PYR1_DROME	r	CAD protein	686222	693085	990332	608818	714022	737108
sp|P06604|TBA2_DROME	P06604	TBA2_DROME	alphaTub85E	Tubulin alpha-2 chain	140801	1.61818e+06	193573	1.98778e+06	221393	388320
sp|P06607|VIT3_DROME	P06607	VIT3_DROME	Yp3	Vitellogenin-3	525780	1.48382e+06	103567	1.45707e+06	98957.6	820861
sp|P06742|MLC1_DROME	P06742	MLC1_DROME	Mlc1	Myosin light chain alkali	617623	1.7915e+06	458528	903370	314036	455753
sp|P06742-2|MLC1_DROME	P06742-2	MLC1_DROME	Mlc1	Isoform Indirect flight muscle of Myosin light chain alkali	214930	3.90709e+06	149161	125900	148242	104780
sp|P06754-2|TPM1_DROME	P06754-2	TPM1_DROME	Tm1	Isoform A of Tropomyosin-1, isoforms 9A/A/B	610828	839104	838788	737114	761072	655262
sp|P07188|LCP3_DROME	P07188	LCP3_DROME	Lcp3	Larval cuticle protein 3	744824	243531	864043	903174	1.45267e+06	237653
sp|P07189|LCP4_DROME	P07189	LCP4_DROME	Lcp4	Larval cuticle protein 4	587062	1.04895e+06	509223	1.1819e+06	873024	302007
sp|P07190|MAL1_DROME	P07190	MAL1_DROME	Mal-A1	Maltase A1	773982	942024	108517	809569	374407	1.35439e+06
sp|P07191|MAL2_DROME	P07191	MAL2_DROME	Mal-A2	Maltase A2	312150	1.3362e+06	256514	1.33903e+06	235852	962507
sp|P07192|MAL3_DROME	P07192	MAL3_DROME	Mal-A3	Maltase A3	247977	1.54316e+06	101437	1.34268e+06	230586	977546
sp|P07486|G3P1_DROME	P07486	G3P1_DROME	Gapdh1	Glyceraldehyde-3-phosphate dehydrogenase 1	1.05632e+06	589659	863178	714613	659010	587498
sp|P07664|SRYD_DROME	P07664	SRYD_DROME	Sry-delta	Serendipity locus protein delta	545853	833473	641582	812660	790661	790497
sp|P07665|SRYB_DROME	P07665	SRYB_DROME	Sry-beta	Serendipity locus protein beta	553158	781661	768959	830956	944883	560725
sp|P07701|SGS5_DROME	P07701	SGS5_DROME	Sgs5	Salivary glue protein Sgs-5	388191	629693	462463	300240	2.29455e+06	284233
sp|P07764|ALF_DROME	P07764	ALF_DROME	Ald	Fructose-bisphosphate aldolase	1.05503e+06	491986	1.04842e+06	520484	797052	548115
sp|P07764-3|ALF_DROME	P07764-3	ALF_DROME	Ald	Isoform Beta of Fructose-bisphosphate aldolase	1.0889e+06	375401	1.21849e+06	451697	840223	490196
sp|P08120|CO4A1_DROME	P08120	CO4A1_DROME	Cg25C	Collagen alpha-1(IV) chain	510754	885593	825329	868787	490327	849931
sp|P08144|AMYA_DROME	P08144	AMYA_DROME	Amy-p	Alpha-amylase A	396995	1.29417e+06	322567	1.34314e+06	453568	666141
sp|P08266|RPB2_DROME	P08266	RPB2_DROME	RpII140	DNA-directed RNA polymerase II subunit RPB2	699940	759060	690640	737716	829945	710316
sp|P08630|BTKL_DROME	P08630	BTKL_DROME	Btk29A	Tyrosine-protein kinase Btk29A	797898	798558	603513	779211	620410	829763
sp|P08646|RAS1_DROME	P08646	RAS1_DROME	Ras85D	Ras-like protein 1	648706	810151	691627	849460	754362	684795
sp|P08736|EF1A1_DROME	P08736	EF1A1_DROME	Ef1alpha48D	Elongation factor 1-alpha 1	1.61379e+06	274007	961216	504831	590733	546564
sp|P08841|TBB3_DROME	P08841	TBB3_DROME	betaTub60D	Tubulin beta-3 chain	634510	808495	677212	793009	739073	772043
sp|P08879|NDKA_DROME	P08879	NDKA_DROME	awd	Nucleoside diphosphate kinase	1.0871e+06	627486	777298	654034	660087	654112
sp|P08953|TOLL_DROME	P08953	TOLL_DROME	Tl	Protein toll	968983	646375	633711	757798	818114	624414
sp|P08970|SUHW_DROME	P08970	SUHW_DROME	su(Hw)	Protein suppressor of hairy wing	725654	635943	779600	688899	994698	604340
sp|P08985|H2AV_DROME	P08985	H2AV_DROME	His2Av	Histone H2A.v	681172	692657	631703	731751	947199	727781
sp|P09085|CAD_DROME	P09085	CAD_DROME	cad	Homeotic protein caudal	572306	797025	542171	1.26065e+06	410564	856759
sp|P09180|RL4_DROME	P09180	RL4_DROME	RpL4	60S ribosomal protein L4	914810	650186	829576	674570	724767	655658
sp|P09208|INSR_DROME	P09208	INSR_DROME	InR	Insulin-like receptor	667729	627090	900920	650898	1.07624e+06	512716
sp|P09491|TPM2_DROME	P09491	TPM2_DROME	Tm2	Tropomyosin-2	583674	1.38767e+06	642999	1.00223e+06	398304	500439
sp|P0DKM0|COA3_DROME	P0DKM0	COA3_DROME	Ccdc56	Cytochrome c oxidase assembly factor 3, mitochondrial	899241	608310	776544	718813	620276	807813
sp|P10040|CRB_DROME	P10040	CRB_DROME	crb	Protein crumbs	647607	655687	686007	603041	1.11434e+06	694033
sp|P10090|WHITE_DROME	P10090	WHITE_DROME	w	Protein white	114688	1.29161e+06	116277	1.47395e+06	91525.9	1.30161e+06
sp|P10351|XDH_DROME	P10351	XDH_DROME	ry	Xanthine dehydrogenase	549297	1.01961e+06	395640	1.17741e+06	320212	969733
sp|P10379|UZIP_DROME	P10379	UZIP_DROME	uzip	Protein unzipped	546146	663123	725886	687352	1.16122e+06	622937
sp|P10987|ACT1_DROME	P10987	ACT1_DROME	Act5C	Actin-5C	654233	756978	482112	1.08512e+06	593496	852732
sp|P11046|LAMB1_DROME	P11046	LAMB1_DROME	LanB1	Laminin subunit beta-1	527302	930084	665456	907245	549547	848338
sp|P11147|HSP7D_DROME	P11147	HSP7D_DROME	Hsc70-4	Heat shock 70 kDa protein cognate 4	751502	812116	728163	751444	608924	784593
sp|P11346|KRAF1_DROME	P11346	KRAF1_DROME	phl	Raf homolog serine/threonine-protein kinase phl	631359	694107	757364	750310	847047	737514
sp|P11584|ITBX_DROME	P11584	ITBX_DROME	mys	Integrin beta-PS	670895	844100	607295	918602	680669	719935
sp|P11995|LSP1A_DROME	P11995	LSP1A_DROME	Lsp1alpha	Larval serum protein 1 alpha chain	1.30765e+06	497630	471881	1.04304e+06	633472	536235
sp|P11996|LSP1B_DROME	P11996	LSP1B_DROME	Lsp1beta	Larval serum protein 1 beta chain	1.12084e+06	414318	680408	835234	930851	482292
sp|P11997|LSP1G_DROME	P11997	LSP1G_DROME	Lsp1gamma	Larval serum protein 1 gamma chain	1.01263e+06	271245	889075	605838	1.36367e+06	305933
sp|P12080|ITA2_DROME	P12080	ITA2_DROME	if	Integrin alpha-PS2	809938	776917	831078	732065	599574	702879
sp|P12370|KAPC_DROME	P12370	KAPC_DROME	Pka-C1	cAMP-dependent protein kinase catalytic subunit	656481	821804	638216	754805	760467	788602
sp|P12426|APT_DROME	P12426	APT_DROME	Aprt	Adenine phosphoribosyltransferase	993497	721416	885153	555816	622529	679124
sp|P12646|G6PD_DROME	P12646	G6PD_DROME	Zw	Glucose-6-phosphate 1-dehydrogenase	1.16059e+06	528673	986329	623905	613483	565895
sp|P12881|PSA1_DROME	P12881	PSA1_DROME	Prosalpha6	Proteasome subunit alpha type-1	896326	659485	858423	657613	776131	605393
sp|P12982|PP12_DROME	P12982	PP12_DROME	Pp1-87B	Serine/threonine-protein phosphatase alpha-2 isoform	809423	766887	857293	610402	686538	711654
sp|P13002-1|ELF1_DROME	P13002-1	ELF1_DROME	grh	Isoform N of Protein grainyhead	827561	356216	928758	482273	1.38037e+06	443232
sp|P13060|EF2_DROME	P13060	EF2_DROME	EF2	Elongation factor 2	912223	757953	770146	729222	577141	709338
sp|P13469|MODU_DROME	P13469	MODU_DROME	mod	DNA-binding protein modulo	706652	806926	780754	769910	595423	777956
sp|P13496|DCTN1_DROME	P13496	DCTN1_DROME	Gl	Dynactin subunit 1	746259	732351	747956	677892	759931	760755
sp|P13582|EAST_DROME	P13582	EAST_DROME	ea	Serine protease easter	396763	962294	741044	810248	562870	934514
sp|P13607|ATNA_DROME	P13607	ATNA_DROME	Atpalpha	Sodium/potassium-transporting ATPase subunit alpha	544397	762720	651621	814877	793873	837078
sp|P14130|RS14_DROME	P14130	RS14_DROME	RpS14a	40S ribosomal protein S14	1.0232e+06	585263	902894	618641	709957	618602
sp|P14199|REF2P_DROME	P14199	REF2P_DROME	ref(2)P	Protein ref(2)P	1.0994e+06	561426	625959	816786	714228	640231
sp|P14318|MP20_DROME	P14318	MP20_DROME	Mp20	Muscle-specific protein 20	379578	725457	701010	1.00502e+06	608305	972935
sp|P15007|ENO_DROME	P15007	ENO_DROME	Eno	Enolase	1.00241e+06	542358	967395	620731	710886	613773
sp|P15215|LAMC1_DROME	P15215	LAMC1_DROME	LanB2	Laminin subunit gamma-1	562895	927708	668820	899062	555380	819586
sp|P15330|DORS_DROME	P15330	DORS_DROME	dl	Embryonic polarity protein dorsal	628171	1.10538e+06	546302	715060	572588	862181
sp|P15357|RS27A_DROME	P15357	RS27A_DROME	RpS27A	Ubiquitin-40S ribosomal protein S27a	826650	610929	823916	691349	781489	699192
sp|P16163|URIC_DROME	P16163	URIC_DROME	Uro	Uricase	189949	1.20706e+06	109523	1.43936e+06	99015.6	1.33781e+06
sp|P16371|GROU_DROME	P16371	GROU_DROME	gro	Protein groucho	577108	770899	704458	700925	968072	693360
sp|P16375|7UP1_DROME	P16375	7UP1_DROME	svp	Steroid receptor seven-up, isoforms B/C	870387	524959	1.22043e+06	503788	670222	657886
sp|P16378|GNAO_DROME	P16378	GNAO_DROME	Galphao	G protein alpha o subunit	563920	775500	630890	774105	855175	805765
sp|P16620|PTP69_DROME	P16620	PTP69_DROME	Ptp69D	Tyrosine-protein phosphatase 69D	734807	694531	702198	713319	925899	657132
sp|P17205|SER1_DROME	P17205	SER1_DROME	Jon99Cii	Serine proteases 1/2	106407	736818	267010	1.80761e+06	296049	1.16957e+06
sp|P17210|KINH_DROME	P17210	KINH_DROME	Khc	Kinesin heavy chain	809018	778978	828524	617354	679644	726978
sp|P17336|CATA_DROME	P17336	CATA_DROME	Cat	Catalase	1.06717e+06	722517	466447	1.02552e+06	372161	809101
sp|P17704|RS17_DROME	P17704	RS17_DROME	RpS17	40S ribosomal protein S17	898782	596754	687442	790107	693076	766149
sp|P17719|DYR_DROME	P17719	DYR_DROME	Dhfr	Dihydrofolate reductase	786250	673724	821200	728200	743390	686781
sp|P17789|TTKB_DROME	P17789	TTKB_DROME	ttk	Protein tramtrack, beta isoform	759710	656474	696772	686263	828124	786169
sp|P17886|CRN_DROME	P17886	CRN_DROME	crn	Protein crooked neck	729430	740746	753831	728023	792320	690316
sp|P17917|PCNA_DROME	P17917	PCNA_DROME	PCNA	Proliferating cell nuclear antigen	708023	643215	872130	541286	1.1074e+06	554433
sp|P18053|PSA4_DROME	P18053	PSA4_DROME	Prosalpha3	Proteasome subunit alpha type-4	780837	742143	789813	695101	680157	747659
sp|P18106|FPS_DROME	P18106	FPS_DROME	Fps85D	Tyrosine-protein kinase Fps85D	837513	734957	733187	663637	777294	691855
sp|P18173|DHGL_DROME	P18173	DHGL_DROME	Gld	Glucose dehydrogenase [FAD, quinone]	664113	858075	649586	741555	606688	895967
sp|P18289|JRA_DROME	P18289	JRA_DROME	Jra	Transcription factor AP-1	727454	487180	804439	682004	992361	713262
sp|P18432|MLR_DROME	P18432	MLR_DROME	Mlc2	Myosin regulatory light chain 2	484204	1.88151e+06	356051	1.10533e+06	301521	419336
sp|P18489|SYB_DROME	P18489	SYB_DROME	Syb	Synaptobrevin	849003	555501	831960	651122	774561	760351
sp|P18929|NU1M_DROME	P18929	NU1M_DROME	mt:ND1	NADH-ubiquinone oxidoreductase chain 1	736785	850862	703863	787526	573136	787885
sp|P18930|NU3M_DROME	P18930	NU3M_DROME	mt:ND3	NADH-ubiquinone oxidoreductase chain 3	947319	459133	743984	810282	621970	840957
sp|P18934|NU4LM_DROME	P18934	NU4LM_DROME	mt:ND4L	NADH-ubiquinone oxidoreductase chain 4L	935748	702844	726220	310452	684190	1.02809e+06
sp|P18935|CYB_DROME	P18935	CYB_DROME	mt:Cyt-b	Cytochrome b	843419	756123	916860	589514	763092	588563
sp|P19109|DDX17_DROME	P19109	DDX17_DROME	Rm62	ATP-dependent RNA helicase p62	633664	792714	725353	718199	758646	789924
sp|P19339-7|SXL_DROME	P19339-7	SXL_DROME	Sxl	Isoform G of Protein sex-lethal	682315	287113	962706	301036	1.59285e+06	548157
sp|P19538|CI_DROME	P19538	CI_DROME	ci	Transcriptional activator cubitus interruptus	806397	604989	824993	743999	728454	724496
sp|P20007|PCKG_DROME	P20007	PCKG_DROME	Pepck	Phosphoenolpyruvate carboxykinase [GTP]	407894	317846	1.91941e+06	488179	903694	412771
sp|P20028|RPA2_DROME	P20028	RPA2_DROME	RpI135	DNA-directed RNA polymerase I subunit RPA2	724468	779605	740487	733579	688814	764584
sp|P20240|OTE_DROME	P20240	OTE_DROME	Ote	Otefin	646830	390240	974050	462970	1.45895e+06	469113
sp|P20348|JANA_DROME	P20348	JANA_DROME	janA	Sex-regulated protein janus-A	1.15949e+06	277759	1.27308e+06	282932	1.18414e+06	290925
sp|P20351|T23O_DROME	P20351	T23O_DROME	v	Tryptophan 2,3-dioxygenase	894609	638559	866539	786574	506116	758116
sp|P20353|GNAI_DROME	P20353	GNAI_DROME	Galphai	G protein alpha i subunit	539773	808513	660160	847373	778827	782019
sp|P20354|GNAS_DROME	P20354	GNAS_DROME	Galphas	G protein alpha s subunit	677073	747152	816453	720119	738336	731437
sp|P20432|GSTT1_DROME	P20432	GSTT1_DROME	GstD1	Glutathione S-transferase 1-1	570315	1.11173e+06	361506	1.06254e+06	301713	1.01917e+06
sp|P20478|GLNA2_DROME	P20478	GLNA2_DROME	Gs2	Glutamine synthetase 2 cytoplasmic	298691	1.05361e+06	555788	812986	295967	1.34222e+06
sp|P20478-3|GLNA2_DROME	P20478-3	GLNA2_DROME	Gs2	Isoform B of Glutamine synthetase 2 cytoplasmic	314421	934024	978261	284998	581391	1.25052e+06
sp|P20480|NCD_DROME	P20480	NCD_DROME	ncd	Protein claret segregational	549199	698127	763115	716423	994994	688823
sp|P21187|PABP_DROME	P21187	PABP_DROME	pAbp	Polyadenylate-binding protein	877345	576141	999601	634149	766841	598343
sp|P21461|SINA_DROME	P21461	SINA_DROME	sina	E3 ubiquitin-protein ligase sina	766719	686290	783649	688768	837013	671183
sp|P21519|MAM_DROME	P21519	MAM_DROME	mam	Neurogenic protein mastermind	692307	456940	697038	654179	1.09722e+06	785474
sp|P21521|SY65_DROME	P21521	SY65_DROME	Syt1	Synaptotagmin 1	1.12378e+06	301264	1.20874e+06	552417	1.02841e+06	272046
sp|P21914|SDHB_DROME	P21914	SDHB_DROME	SdhB	Succinate dehydrogenase [ubiquinone] iron-sulfur subunit, mitochondrial	767440	932690	508478	889355	488029	853892
sp|P22293|SUS_DROME	P22293	SUS_DROME	su(s)	Protein suppressor of sable	741533	659660	728446	640526	899736	743909
sp|P22464|ANXB9_DROME	P22464	ANXB9_DROME	AnxB9	Annexin B9	604111	839844	724964	803714	786365	677556
sp|P22465|ANX10_DROME	P22465	ANX10_DROME	AnxB10	Annexin B10	666931	723128	960961	632550	662347	780870
sp|P22465-2|ANX10_DROME	P22465-2	ANX10_DROME	AnxB10	Isoform A of Annexin B10	835492	735035	869953	443029	850562	695508
sp|P22700|ATC1_DROME	P22700	ATC1_DROME	Ca-P60A	Calcium-transporting ATPase sarcoplasmic/endoplasmic reticulum type	752529	907706	611606	989578	564417	643613
sp|P22769|PSA71_DROME	P22769	PSA71_DROME	Prosalpha4	Proteasome subunit alpha type-7-1	709343	767407	800371	744035	698382	718443
sp|P22812|TUBE_DROME	P22812	TUBE_DROME	tub	Protein Tube	882708	600570	841973	692008	720962	701585
sp|P22813|HSF_DROME	P22813	HSF_DROME	Hsf	Heat shock factor protein	636974	559194	739026	686268	935867	832556
sp|P22817|IDE_DROME	P22817	IDE_DROME	Ide	Insulin-degrading enzyme	829435	760076	767374	647786	669856	761311
sp|P23128|DDX6_DROME	P23128	DDX6_DROME	me31B	Putative ATP-dependent RNA helicase me31b	724802	715056	859006	694338	814146	634068
sp|P23226|MA205_DROME	P23226	MA205_DROME	Map205	205 kDa microtubule-associated protein	488123	583476	933118	642695	1.02211e+06	726748
sp|P23257|TBG1_DROME	P23257	TBG1_DROME	gammaTub23C	Tubulin gamma-1 chain	551876	885568	588829	899611	639086	853987
sp|P23380|VATL_DROME	P23380	VATL_DROME	Vha16-1	V-type proton ATPase 16 kDa proteolipid subunit	645394	1.01004e+06	500365	918717	540227	824153
sp|P23572|CDK1_DROME	P23572	CDK1_DROME	cdc2	Cyclin-dependent kinase 1	310522	908741	505804	779789	979285	891219
sp|P23625-2|GNAQ_DROME	P23625-2	GNAQ_DROME	Galphaq	Isoform A of G protein alpha q subunit	735210	632762	954957	653699	866307	598114
sp|P23647|FUSED_DROME	P23647	FUSED_DROME	fu	Serine/threonine-protein kinase fused	623967	638023	700844	800716	945922	704312
sp|P23696|PP2A_DROME	P23696	PP2A_DROME	mts	Serine/threonine-protein phosphatase PP2A	714830	767309	712049	671391	791463	764588
sp|P23779|CYTL_DROME	P23779	CYTL_DROME	Cys	Cystatin-like protein	742302	716080	765020	874111	729929	624891
sp|P24014|SLIT_DROME	P24014	SLIT_DROME	sli	Protein slit	570070	724655	664414	864453	859171	734280
sp|P24156|L2CC_DROME	P24156	L2CC_DROME	l(2)37Cc	Protein l(2)37Cc	866241	744012	747911	751153	619799	719823
sp|P24785|MLE_DROME	P24785	MLE_DROME	mle	Dosage compensation regulator	715007	820088	819731	710054	716929	665051
sp|P25007|PPIA_DROME	P25007	PPIA_DROME	Cyp1	Peptidyl-prolyl cis-trans isomerase	869676	715403	714439	728062	663040	748807
sp|P25008|CCNC_DROME	P25008	CCNC_DROME	CycC	Cyclin-C	492008	782030	642337	771906	906867	803955
sp|P25160|ARL1_DROME	P25160	ARL1_DROME	Arl1	ADP-ribosylation factor-like protein 1	852667	676267	822511	729269	714985	654116
sp|P25167|RPC2_DROME	P25167	RPC2_DROME	RpIII128	DNA-directed RNA polymerase III subunit RPC2	754094	763569	812163	620208	766564	716220
sp|P25171|RCC1_DROME	P25171	RCC1_DROME	Rcc1	Regulator of chromosome condensation	828579	784255	613201	640146	732901	821522
sp|P25228|RAB3_DROME	P25228	RAB3_DROME	Rab3	Ras-related protein Rab-3	461188	442692	805495	519865	1.38131e+06	746227
sp|P25723|TLD_DROME	P25723	TLD_DROME	tld	Dorsal-ventral patterning protein tolloid	582020	723722	476647	959631	924020	744854
sp|P25822|PUM_DROME	P25822	PUM_DROME	pum	Maternal protein pumilio	521726	762148	614274	750449	959539	789278
sp|P25823|TUD_DROME	P25823	TUD_DROME	tud	Maternal protein tudor	938234	604878	943603	622831	667995	672999
sp|P25867|UBCD1_DROME	P25867	UBCD1_DROME	eff	Ubiquitin-conjugating enzyme E2-17 kDa	794201	729742	790898	622130	750583	742521
sp|P25991|SUF_DROME	P25991	SUF_DROME	su(f)	Protein suppressor of forked	663598	820430	669787	757249	753127	761674
sp|P26019|DPOLA_DROME	P26019	DPOLA_DROME	DNApol-alpha180	DNA polymerase alpha catalytic subunit	505520	900869	589128	776517	802608	832017
sp|P26270|PSMD7_DROME	P26270	PSMD7_DROME	Rpn8	26S proteasome non-ATPase regulatory subunit 7	911236	659376	877993	641328	760243	604957
sp|P26675|SOS_DROME	P26675	SOS_DROME	Sos	Protein son of sevenless	725764	681954	781837	726615	911983	608770
sp|P26686|SRR55_DROME	P26686	SRR55_DROME	B52	Serine-arginine protein 55	678670	709563	692495	763889	856750	720486
sp|P26802|DDX51_DROME	P26802	DDX51_DROME	Dbp73D	Probable ATP-dependent RNA helicase Dbp73D	676890	750853	779798	744138	716666	759519
sp|P27091|60A_DROME	P27091	60A_DROME	gbb	Protein 60A	712940	686733	642404	740761	979142	660185
sp|P28159|SUH_DROME	P28159	SUH_DROME	Su(H)	Suppressor of hairless protein	668660	797358	754872	816095	739176	667276
sp|P28668|SYEP_DROME	P28668	SYEP_DROME	Aats-glupro	Bifunctional glutamate/proline--tRNA ligase	944895	657370	909015	623440	725787	599393
sp|P29310-2|1433Z_DROME	P29310-2	1433Z_DROME	14-3-3zeta	Isoform VI' of 14-3-3 protein zeta	784412	642493	864336	678647	807316	660198
sp|P29327|RS6_DROME	P29327	RS6_DROME	RpS6	40S ribosomal protein S6	1.00866e+06	561955	790735	653308	726740	700776
sp|P29327-2|RS6_DROME	P29327-2	RS6_DROME	RpS6	Isoform B of 40S ribosomal protein S6	725489	928576	893369	695661	587129	635739
sp|P29349|CSW_DROME	P29349	CSW_DROME	csw	Tyrosine-protein phosphatase corkscrew	1.02428e+06	607262	785501	639746	735768	657816
sp|P29413|CALR_DROME	P29413	CALR_DROME	Crc	Calreticulin	1.06066e+06	690227	747467	720184	681271	573730
sp|P29613|TPIS_DROME	P29613	TPIS_DROME	Tpi	Triosephosphate isomerase	1.05233e+06	526254	968624	701280	616293	604348
sp|P29617|PROS_DROME	P29617	PROS_DROME	pros	Homeobox protein prospero	648753	413423	655567	408817	1.4816e+06	744661
sp|P29742|CLH_DROME	P29742	CLH_DROME	Chc	Clathrin heavy chain	722970	828803	665737	757631	670914	784920
sp|P29747|CREBA_DROME	P29747	CREBA_DROME	CrebA	Cyclic AMP response element-binding protein A	641256	814476	756807	584315	747121	862587
sp|P29843|HSP7A_DROME	P29843	HSP7A_DROME	Hsc70-1	Heat shock 70 kDa protein cognate 1	371687	2.533e+06	394490	432025	357096	455834
sp|P29844|HSP7C_DROME	P29844	HSP7C_DROME	Hsc70-3	Heat shock 70 kDa protein cognate 3	1.06055e+06	570362	926026	604799	795432	513035
sp|P29845|HSP7E_DROME	P29845	HSP7E_DROME	Hsc70-5	Heat shock 70 kDa protein cognate 5	964441	741172	771719	731080	545110	706913
sp|P29993|ITPR_DROME	P29993	ITPR_DROME	Itp-r83A	Inositol 1,4,5-trisphosphate receptor	793051	754592	690058	808577	602686	788068
sp|P30430|FUR1C_DROME	P30430	FUR1C_DROME	Fur1	Furin-like protease 1, isoform 1-CRR	1.04843e+06	591117	680414	753209	707490	671167
sp|P32100|RL7_DROME	P32100	RL7_DROME	RpL7	60S ribosomal protein L7	894259	661800	772191	733116	680290	703573
sp|P32234|128UP_DROME	P32234	128UP_DROME	128up	GTP-binding protein 128up	931777	651212	856646	632222	714075	663407
sp|P32392|ARP3_DROME	P32392	ARP3_DROME	Arp3	Actin-related protein 3	702243	837729	549270	868623	654613	815194
sp|P32748|PYRD_DROME	P32748	PYRD_DROME	Dhod	Dihydroorotate dehydrogenase (quinone), mitochondrial	829693	720787	727121	754591	691576	717689
sp|P32866|GPRK2_DROME	P32866	GPRK2_DROME	Gprk2	G protein-coupled receptor kinase 2	803237	670485	882781	676420	766885	644969
sp|P33269|CP4D1_DROME	P33269	CP4D1_DROME	Cyp4d1	Cytochrome P450 4d1	1.42309e+06	191854	1.18348e+06	295998	1.14079e+06	250215
sp|P33269-2|CP4D1_DROME	P33269-2	CP4D1_DROME	Cyp4d1	Isoform Short of Cytochrome P450 4d1	1.38633e+06	194265	1.25737e+06	277312	1.12454e+06	246376
sp|P33270|CP6A2_DROME	P33270	CP6A2_DROME	Cyp6a2	Cytochrome P450 6a2	547027	740036	463355	1.17741e+06	265155	1.19709e+06
sp|P34739|TTF2_DROME	P34739	TTF2_DROME	lds	Transcription termination factor 2	346352	1.08569e+06	466422	946131	645173	916767
sp|P35005|TRYE_DROME	P35005	TRYE_DROME	epsilonTry	Trypsin epsilon	721691	942164	249705	1.4359e+06	104299	997539
sp|P35220|CTNA_DROME	P35220	CTNA_DROME	alpha-Cat	Catenin alpha	534713	735625	595751	705031	1.09709e+06	727504
sp|P35381|ATPA_DROME	P35381	ATPA_DROME	blw	ATP synthase subunit alpha, mitochondrial	933307	732622	762033	688557	586073	746011
sp|P35421|PUR4_DROME	P35421	PUR4_DROME	ade2	Phosphoribosylformylglycinamidine synthase	879957	740245	602694	794784	510043	900147
sp|P35600|RFC1_DROME	P35600	RFC1_DROME	Gnf1	Replication factor C subunit 1	586300	800275	771363	720813	848827	697841
sp|P35832|PTP99_DROME	P35832	PTP99_DROME	Ptp99A	Tyrosine-protein phosphatase 99A	690228	671988	735926	786314	861796	681506
sp|P35875|PARP_DROME	P35875	PARP_DROME	Parp	Poly [ADP-ribose] polymerase	371814	1.10608e+06	443852	942005	510673	1.026e+06
sp|P36241|RL19_DROME	P36241	RL19_DROME	RpL19	60S ribosomal protein L19	1.00184e+06	621684	824926	548923	786483	660572
sp|P36872|2ABA_DROME	P36872	2ABA_DROME	tws	Protein phosphatase PP2A 55 kDa regulatory subunit	738264	721906	712483	746777	821191	691371
sp|P36951|HYI_DROME	P36951	HYI_DROME	Gip	Putative hydroxypyruvate isomerase	860089	747087	671781	784148	573085	802602
sp|P36958|RPB9_DROME	P36958	RPB9_DROME	RpII15	DNA-directed RNA polymerase II subunit RPB9	695601	771728	809783	770597	721422	674397
sp|P37160|LYSS_DROME	P37160	LYSS_DROME	LysS	Lysozyme S	1.35397e+06	675969	222302	513731	616553	1.02573e+06
sp|P37161|LYSX_DROME	P37161	LYSX_DROME	LysX	Lysozyme X	139193	1.34723e+06	124573	1.23152e+06	115282	1.41104e+06
sp|P38040|GBG1_DROME	P38040	GBG1_DROME	Ggamma1	Guanine nucleotide-binding protein subunit gamma-1	762828	484009	787220	843967	815916	727748
sp|P38979|RSSA_DROME	P38979	RSSA_DROME	sta	40S ribosomal protein SA	933013	628400	841026	677119	728711	643168
sp|P39205|CIN_DROME	P39205	CIN_DROME	cin	Molybdenum cofactor synthesis protein cinnamon	890809	645778	873006	688839	719445	634957
sp|P39769|PHP_DROME	P39769	PHP_DROME	ph-p	Polyhomeotic-proximal chromatin protein	471759	426304	707989	543016	1.4568e+06	744843
sp|P40301|PSA2_DROME	P40301	PSA2_DROME	Prosalpha2	Proteasome subunit alpha type-2	837901	715092	830498	715527	721698	632638
sp|P40304|PSB1_DROME	P40304	PSB1_DROME	Prosbeta6	Proteasome subunit beta type-1	745117	763320	791616	723476	679816	734337
sp|P40320|METK_DROME	P40320	METK_DROME	Sam-S	S-adenosylmethionine synthase	556523	980523	444378	696016	780820	935386
sp|P40417|ERKA_DROME	P40417	ERKA_DROME	rl	Mitogen-activated protein kinase ERK-A	685470	733293	744659	718614	811150	731140
sp|P40423|SQH_DROME	P40423	SQH_DROME	sqh	Myosin regulatory light chain sqh	609189	801415	540310	862492	814476	787063
sp|P40656|SOX14_DROME	P40656	SOX14_DROME	Sox14	Putative transcription factor SOX-14	931760	614060	560765	598576	706116	982409
sp|P40796|LA_DROME	P40796	LA_DROME	La	La protein homolog	596606	819552	673988	763856	678422	877650
sp|P40797|PNUT_DROME	P40797	PNUT_DROME	pnut	Protein peanut	513649	911739	529309	892516	768069	801195
sp|P40807|DCOR1_DROME	P40807	DCOR1_DROME	Odc1	Ornithine decarboxylase 1	769795	364931	1.46762e+06	344169	1.04904e+06	447469
sp|P40808|DCOR2_DROME	P40808	DCOR2_DROME	Odc2	Ornithine decarboxylase 2	741638	785058	814818	769778	488356	837385
sp|P40946|ARF3_DROME	P40946	ARF3_DROME	Arf51F	ADP-ribosylation factor 3	695467	713039	833637	747583	812745	637878
sp|P41042|RS4_DROME	P41042	RS4_DROME	RpS4	40S ribosomal protein S4	923376	683973	790932	687300	695784	669528
sp|P41044|CAB32_DROME	P41044	CAB32_DROME	Cbp53E	Calbindin-32	621210	497948	628705	566349	1.10277e+06	937454
sp|P41093|RL18A_DROME	P41093	RL18A_DROME	RpL18A	60S ribosomal protein L18a	943047	670875	692234	690853	746336	698562
sp|P41094|RS18_DROME	P41094	RS18_DROME	RpS18	40S ribosomal protein S18	914972	730213	756550	801294	581204	677032
sp|P41374|IF2A_DROME	P41374	IF2A_DROME	eIF-2alpha	Eukaryotic translation initiation factor 2 subunit 1	842455	720484	883712	695540	662125	651040
sp|P41375|IF2B_DROME	P41375	IF2B_DROME	eIF-2beta	Eukaryotic translation initiation factor 2 subunit 2	768439	644369	818081	695896	716684	780549
sp|P41572|6PGD_DROME	P41572	6PGD_DROME	Pgd	6-phosphogluconate dehydrogenase, decarboxylating	1.28087e+06	376572	1.11566e+06	473064	798310	439195
sp|P41900|T2FB_DROME	P41900	T2FB_DROME	TfIIFbeta	General transcription factor IIF subunit 2	680154	674558	730696	720397	795583	809131
sp|P42207|SEPT1_DROME	P42207	SEPT1_DROME	42614	Septin-1	495232	947393	526673	900278	760574	789394
sp|P42278|TRYT_DROME	P42278	TRYT_DROME	thetaTry	Trypsin theta	579703	908857	474242	1.29823e+06	547891	656825
sp|P42279|TRYU_DROME	P42279	TRYU_DROME	etaTry	Trypsin eta	478046	1.14643e+06	173867	1.27428e+06	368481	985746
sp|P42280|TRYZ_DROME	P42280	TRYZ_DROME	zetaTry	Trypsin zeta	621902	1.38153e+06	127700	1.48446e+06	259534	634208
sp|P42281|ACBP_DROME	P42281	ACBP_DROME	Dbi	Acyl-CoA-binding protein homolog	1.23883e+06	323563	693878	664298	452363	1.03607e+06
sp|P42286|THR_DROME	P42286	THR_DROME	thr	Protein three rows	509085	941860	625915	826357	698254	818078
sp|P42787-3|CBPD_DROME	P42787-3	CBPD_DROME	svr	Isoform 3 of Carboxypeptidase D	1.13686e+06	584867	674769	656884	866856	542149
sp|P42787-5|CBPD_DROME	P42787-5	CBPD_DROME	svr	Isoform 5 of Carboxypeptidase D	1.22885e+06	397000	815847	559820	1.03005e+06	433050
sp|P43332|SNRPA_DROME	P43332	SNRPA_DROME	snf	U1 small nuclear ribonucleoprotein A	750860	776403	715195	610383	936613	641873
sp|P45437|COPB_DROME	P45437	COPB_DROME	betaCop	Coatomer subunit beta	864685	705264	764925	670479	743985	692073
sp|P45594|CADF_DROME	P45594	CADF_DROME	tsr	Cofilin/actin-depolymerizing factor homolog	642471	783871	586868	863867	663289	873202
sp|P45888|ARP2_DROME	P45888	ARP2_DROME	Arp2	Actin-related protein 2	691874	797616	668032	788525	725568	757853
sp|P45889|ACTZ_DROME	P45889	ACTZ_DROME	Arp1	Actin-related protein 1	778950	697011	752090	720673	780827	704114
sp|P45890|ARP6_DROME	P45890	ARP6_DROME	Arp6	Actin-related protein 6	641170	797143	654346	760281	814747	753118
sp|P45891|ACTY_DROME	P45891	ACTY_DROME	Arp53D	Actin-like protein 53D	397647	930904	520278	1.30901e+06	469795	812655
sp|P45975|SUV39_DROME	P45975	SUV39_DROME	Su(var)3-9	Histone-lysine N-methyltransferase Su(var)3-9	749091	822788	680163	725731	629586	821264
sp|P46222|RL11_DROME	P46222	RL11_DROME	RpL11	60S ribosomal protein L11	894911	682861	865664	704088	716813	596568
sp|P46223|RL7A_DROME	P46223	RL7A_DROME	RpL7A	60S ribosomal protein L7a	891601	674127	788909	739044	659913	695112
sp|P46415|ADHX_DROME	P46415	ADHX_DROME	Fdh	Alcohol dehydrogenase class-3	798068	832826	640595	851443	511548	809206
sp|P46863|KL61_DROME	P46863	KL61_DROME	Klp61F	Bipolar kinesin KRP-130	452143	824075	639024	743550	941033	797103
sp|P47948|TNNC2_DROME	P47948	TNNC2_DROME	TpnC47D	Troponin C, isoform 2	699900	764356	560066	1.20504e+06	496534	730793
sp|P47949|TNNC3_DROME	P47949	TNNC3_DROME	TpnC73F	Troponin C, isoform 3	505618	982074	534404	1.39452e+06	393296	667492
sp|P48159|RL23_DROME	P48159	RL23_DROME	RpL23	60S ribosomal protein L23	1.00228e+06	639866	796938	669102	753961	597485
sp|P48375|FKB12_DROME	P48375	FKB12_DROME	FK506-bp2	12 kDa FK506-binding protein	1.02245e+06	597503	793641	706807	676889	658292
sp|P48461|PP11_DROME	P48461	PP11_DROME	Pp1alpha-96A	Serine/threonine-protein phosphatase alpha-1 isoform	866605	648285	915570	627441	732192	656656
sp|P48555|RALA_DROME	P48555	RALA_DROME	Rala	Ras-related protein Ral-a	542201	837594	537499	809058	492122	1.15813e+06
sp|P48588|RS25_DROME	P48588	RS25_DROME	RpS25	40S ribosomal protein S25	910912	517258	891305	691494	705170	720505
sp|P48591|RIR1_DROME	P48591	RIR1_DROME	RnrL	Ribonucleoside-diphosphate reductase large subunit	522518	922760	521669	858476	663864	916429
sp|P48592|RIR2_DROME	P48592	RIR2_DROME	RnrS	Ribonucleoside-diphosphate reductase subunit M2	379008	1.06981e+06	525046	789517	597211	1.02978e+06
sp|P48596|GCH1_DROME	P48596	GCH1_DROME	Pu	GTP cyclohydrolase 1	844559	692738	609143	915972	546600	827069
sp|P48601|PRS4_DROME	P48601	PRS4_DROME	Rpt2	26S protease regulatory subunit 4	826602	671487	863082	645373	775062	660328
sp|P48604|GRPE_DROME	P48604	GRPE_DROME	Roe1	GrpE protein homolog, mitochondrial	963281	569242	811749	647993	671887	769504
sp|P48607-5|SPZ_DROME	P48607-5	SPZ_DROME	spz	Isoform 8.29 of Protein spaetzle	494702	854781	712298	763189	685227	894083
sp|P48609|CDK5_DROME	P48609	CDK5_DROME	Cdk5	Cyclin-dependent kinase 5 homolog	811126	684062	783220	714644	761842	684434
sp|P48610-2|KARG_DROME	P48610-2	KARG_DROME	Argk	Isoform A of Arginine kinase	690188	884402	766281	742516	659502	703378
sp|P48611|PTPS_DROME	P48611	PTPS_DROME	pr	6-pyruvoyl tetrahydrobiopterin synthase	861193	597319	974616	753210	626171	644909
sp|P48612|PELO_DROME	P48612	PELO_DROME	pelo	Protein pelota	687011	784337	823646	748745	678816	717083
sp|P49028|MGN_DROME	P49028	MGN_DROME	mago	Protein mago nashi	914641	951298	774792	108691	897244	771066
sp|P49258|CALL_DROME	P49258	CALL_DROME	Acam	Calmodulin-related protein 97A	630878	454559	1.34998e+06	619057	1.14401e+06	267742
sp|P49455|TPM4_DROME	P49455	TPM4_DROME	Tm1	Tropomyosin-1, isoforms 33/34	345415	1.97583e+06	371573	925361	341779	557148
sp|P49455-2|TPM4_DROME	P49455-2	TPM4_DROME	Tm1	Isoform 34 of Tropomyosin-1, isoforms 33/34	105734	3.99023e+06	160107	98233.7	180867	109683
sp|P49630|RL36_DROME	P49630	RL36_DROME	RpL36	60S ribosomal protein L36	933693	590113	896380	648090	741678	639753
sp|P49657|MNB_DROME	P49657	MNB_DROME	mnb	Serine/threonine-protein kinase minibrain	628469	712741	647331	694538	1.02779e+06	698146
sp|P49735|MCM2_DROME	P49735	MCM2_DROME	Mcm2	DNA replication licensing factor Mcm2	497557	785645	646864	747488	954634	768952
sp|P49846|TAF5_DROME	P49846	TAF5_DROME	Taf5	Transcription initiation factor TFIID subunit 5	765899	676907	728315	661396	937535	656965
sp|P49847|TAF6_DROME	P49847	TAF6_DROME	Taf6	Transcription initiation factor TFIID subunit 6	762924	692260	757759	708994	720382	782257
sp|P49905|TAF12_DROME	P49905	TAF12_DROME	Taf12	Transcription initiation factor TFIID subunit 12	811288	562344	766156	757696	864698	668416
sp|P49906|TAF11_DROME	P49906	TAF11_DROME	Taf11	Transcription initiation factor TFIID subunit 11	745738	521827	737522	687098	951007	760408
sp|P49963|SRP19_DROME	P49963	SRP19_DROME	Srp19	Signal recognition particle 19 kDa protein	1.01123e+06	549173	795034	705059	780310	612297
sp|P50245|SAHH2_DROME	P50245	SAHH2_DROME	Ahcy89E	Putative adenosylhomocysteinase 2	713623	822316	579071	853639	594026	861922
sp|P50882|RL9_DROME	P50882	RL9_DROME	RpL9	60S ribosomal protein L9	922721	675676	788830	696738	708925	658618
sp|P50887|RL22_DROME	P50887	RL22_DROME	RpL22	60S ribosomal protein L22	795733	684506	691795	761961	591165	892669
sp|P51140|DSH_DROME	P51140	DSH_DROME	dsh	Segment polarity protein dishevelled	607104	668446	660862	673712	1.05408e+06	734319
sp|P51406|BYS_DROME	P51406	BYS_DROME	bys	Bystin	679851	664817	960434	660379	820027	649677
sp|P51592|HYD_DROME	P51592	HYD_DROME	hyd	E3 ubiquitin-protein ligase hyd	667047	784701	837575	725985	749150	675537
sp|P52029|G6PI_DROME	P52029	G6PI_DROME	Pgi	Glucose-6-phosphate isomerase	1.17184e+06	462770	1.10701e+06	567078	672597	501790
sp|P52034|K6PF_DROME	P52034	K6PF_DROME	Pfk	6-phosphofructokinase	667852	841569	766270	749461	637247	772132
sp|P52172-2|SRP_DROME	P52172-2	SRP_DROME	srp	Isoform 2 of Box A-binding factor	980995	339346	1.16838e+06	583526	783950	592571
sp|P52295|IMA_DROME	P52295	IMA_DROME	Pen	Importin subunit alpha	322143	1.09479e+06	384893	865173	746356	973516
sp|P52302|MBN_DROME	P52302	MBN_DROME	l(3)mbn	Protein lethal(3)malignant blood neoplasm 1	966202	326824	589728	991039	1.35763e+06	233336
sp|P52304|POLO_DROME	P52304	POLO_DROME	polo	Serine/threonine-protein kinase polo	355481	877625	491837	945059	882691	841556
sp|P52485|UBCD2_DROME	P52485	UBCD2_DROME	UbcD2	Ubiquitin-conjugating enzyme E2-24 kDa	565016	898207	625821	836528	712993	786032
sp|P52486|UBCD4_DROME	P52486	UBCD4_DROME	UbcD4	Ubiquitin-conjugating enzyme E2-22 kDa	757972	744429	799700	797781	664655	683750
sp|P52654|TF2AA_DROME	P52654	TF2AA_DROME	TfIIA-L	Transcription initiation factor IIA subunit 1	650694	697931	729655	725554	748536	854088
sp|P52656|T2AG_DROME	P52656	T2AG_DROME	TfIIA-S	Transcription initiation factor IIA subunit 2	529500	836448	733298	733905	772549	806639
sp|P52905|TRYI_DROME	P52905	TRYI_DROME	iotaTry	Trypsin iota	469842	1.65174e+06	432883	721564	374529	813406
sp|P53034|RFC2_DROME	P53034	RFC2_DROME	RfC4	Replication factor C subunit 2	544817	810211	719928	702273	913360	723643
sp|P53624|MA121_DROME	P53624	MA121_DROME	alpha-Man-I	Mannosyl-oligosaccharide alpha-1,2-mannosidase isoform A	719054	807053	680391	868039	605006	761387
sp|P53777|MLP1_DROME	P53777	MLP1_DROME	Mlp60A	Muscle LIM protein 1	366794	419067	868662	742750	974977	977482
sp|P53997|SET_DROME	P53997	SET_DROME	Set	Protein SET	613008	706691	653393	749169	888071	793870
sp|P54195|OB28A_DROME	P54195	OB28A_DROME	Obp28a	General odorant-binding protein 28a	369460	500579	956467	850986	843875	862504
sp|P54351|NSF2_DROME	P54351	NSF2_DROME	Nsf2	Vesicle-fusing ATPase 2	795572	802867	635204	799350	605332	798007
sp|P54352-2|EAS_DROME	P54352-2	EAS_DROME	eas	Isoform A of Ethanolamine kinase	542393	1.05188e+06	389095	1.00196e+06	405191	1.02387e+06
sp|P54353|DOD_DROME	P54353	DOD_DROME	dod	Putative peptidyl-prolyl cis-trans isomerase dodo	737512	778903	706761	720860	733461	752601
sp|P54358|DPOD1_DROME	P54358	DPOD1_DROME	DNApol-delta	DNA polymerase delta catalytic subunit	525410	889547	631932	793476	729920	841430
sp|P54359|SEPT2_DROME	P54359	SEPT2_DROME	42615	Septin-2	573546	828707	606464	840768	810344	759578
sp|P54361|OAZ_DROME	P54361	OAZ_DROME	Oda	Ornithine decarboxylase antizyme	1.00864e+06	542951	832614	811900	656569	611747
sp|P54362|AP3D_DROME	P54362	AP3D_DROME	g	AP-3 complex subunit delta	784212	652989	871863	729243	765621	641036
sp|P54385|DHE3_DROME	P54385	DHE3_DROME	Gdh	Glutamate dehydrogenase, mitochondrial	579836	1.05049e+06	326485	1.13996e+06	224893	1.0977e+06
sp|P54385-2|DHE3_DROME	P54385-2	DHE3_DROME	Gdh	Isoform C of Glutamate dehydrogenase, mitochondrial	676735	1.05471e+06	412819	982820	270802	1.03095e+06
sp|P54397|FKB39_DROME	P54397	FKB39_DROME	FK506-bp1	39 kDa FK506-binding nuclear protein	682968	865318	669187	764557	707022	745389
sp|P54398|FBP2_DROME	P54398	FBP2_DROME	Fbp2	Fat body protein 2	1.30104e+06	267432	1.17391e+06	474771	999041	276368
sp|P54399|PDI_DROME	P54399	PDI_DROME	Pdi	Protein disulfide-isomerase	1.11176e+06	590496	796500	698901	647093	622218
sp|P54611|VATE_DROME	P54611	VATE_DROME	Vha26	V-type proton ATPase subunit E	702275	770084	536743	801914	621268	969294
sp|P54622|SSBP_DROME	P54622	SSBP_DROME	mtSSB	Single-stranded DNA-binding protein, mitochondrial	628901	877835	603188	912189	628184	784052
sp|P55162|HEM_DROME	P55162	HEM_DROME	Hem	Membrane-associated protein Hem	678567	796531	665005	800868	803928	689377
sp|P55824|FAF_DROME	P55824	FAF_DROME	faf	Probable ubiquitin carboxyl-terminal hydrolase FAF	757845	770602	764369	737444	692893	717109
sp|P55828|RS20_DROME	P55828	RS20_DROME	RpS20	40S ribosomal protein S20	942165	736183	628157	723833	624617	784423
sp|P55830|RS3A_DROME	P55830	RS3A_DROME	RpS3A	40S ribosomal protein S3a	895495	672602	760168	690717	719923	702997
sp|P55841|RL14_DROME	P55841	RL14_DROME	RpL14	60S ribosomal protein L14	1.02073e+06	614693	819151	637300	726221	636779
sp|P55935|RS9_DROME	P55935	RS9_DROME	RpS9	40S ribosomal protein S9	870135	683431	855163	728836	654116	662593
sp|P56079|CDSA_DROME	P56079	CDSA_DROME	CdsA	Phosphatidate cytidylyltransferase, photoreceptor-specific	976758	634068	770874	715671	830436	535463
sp|P56175|RCL1_DROME	P56175	RCL1_DROME	Rtc1	Probable RNA 3'-terminal phosphate cyclase-like protein	698989	879180	613007	818880	563813	855151
sp|P56538|IF6_DROME	P56538	IF6_DROME	eIF6	Eukaryotic translation initiation factor 6	664121	885180	673487	755926	604848	842613
sp|P61851|SODC_DROME	P61851	SODC_DROME	Sod	Superoxide dismutase [Cu-Zn]	766951	735680	848140	710407	624807	753027
sp|P61855|AKH_DROME	P61855	AKH_DROME	Akh	Adipokinetic hormone	660142	597261	530347	593786	959997	1.0156e+06
sp|P61857|TBB2_DROME	P61857	TBB2_DROME	betaTub85D	Tubulin beta-2 chain	636161	670300	1.12935e+06	670321	882267	471138
sp|P62152|CALM_DROME	P62152	CALM_DROME	Cam	Calmodulin	885611	414191	847505	679602	802929	783965
sp|P80455|RS12_DROME	P80455	RS12_DROME	RpS12	40S ribosomal protein S12	958833	649251	776380	687657	727872	651530
sp|P81641|AMYB_DROME	P81641	AMYB_DROME	Amy-d	Alpha-amylase B	124796	1.87006e+06	151098	1.71159e+06	114037	561271
sp|P81900|KAPR2_DROME	P81900	KAPR2_DROME	Pka-R2	cAMP-dependent protein kinase type II regulatory subunit	639101	821531	645610	736811	746646	824866
sp|P81928|140U_DROME	P81928	140U_DROME	140up	RPII140-upstream gene protein	903275	732120	706867	743698	659337	703856
sp|P82147|L2EFL_DROME	P82147	L2EFL_DROME	l(2)efl	Protein lethal(2)essential for life	330829	1.10246e+06	273660	1.40776e+06	619768	713332
sp|P82384|LCP9_DROME	P82384	LCP9_DROME	Lcp9	Larval cuticle protein 9	706877	340726	1.02292e+06	1.00467e+06	1.16936e+06	229092
sp|P82712|CCD1P_DROME	P82712	CCD1P_DROME	Cyp12d1-p	Probable cytochrome P450 12d1 proximal, mitochondrial	574266	893573	502564	1.07843e+06	408098	965002
sp|P82713|CP392_DROME	P82713	CP392_DROME	Cyp309a2	Probable cytochrome P450 309a2	306240	1.19658e+06	271910	1.01056e+06	295718	1.29251e+06
sp|P82804|WIBG_DROME	P82804	WIBG_DROME	wibg	Partner of Y14 and mago	818583	313563	1.02231e+06	511466	884648	840333
sp|P82890|PPAC1_DROME	P82890	PPAC1_DROME	primo-1	Low molecular weight phosphotyrosine protein phosphatase 1	971127	672327	783856	718890	636690	673808
sp|P83094|STIM_DROME	P83094	STIM_DROME	Stim	Stromal interaction molecule homolog	625128	816931	616069	861610	776785	732036
sp|P83097|WSCK_DROME	P83097	WSCK_DROME	Wsck	Putative tyrosine-protein kinase Wsck	481031	968444	609015	808111	766428	785895
sp|P83098|STLK_DROME	P83098	STLK_DROME	Stlk	Putative serine/threonine-protein kinase STE20-like	638405	862556	825504	790556	760527	579676
sp|P83100|MK14C_DROME	P83100	MK14C_DROME	p38c	Putative mitogen-activated protein kinase 14C	1.29019e+06	495441	1.01826e+06	555291	609056	521411
sp|P83102|DYRK3_DROME	P83102	DYRK3_DROME	Dyrk3	Putative dual specificity tyrosine-phosphorylation-regulated kinase 3 homolog	801244	709191	730342	736747	644125	807047
sp|P83548|VNNL3_DROME	P83548	VNNL3_DROME	CG32750	Vanin-like protein 3	627149	1.0131e+06	248367	1.17161e+06	401930	965763
sp|P83949|UBX_DROME	P83949	UBX_DROME	Ubx	Homeotic protein ultrabithorax	607828	311769	1.01256e+06	326639	1.57369e+06	542720
sp|P83967|ACT6_DROME	P83967	ACT6_DROME	Act88F	Actin, indirect flight muscle	366583	3.11855e+06	332645	327849	247170	216055
sp|P84029|CYC2_DROME	P84029	CYC2_DROME	Cyt-c-p	Cytochrome c-2	858279	626972	858669	711411	571590	807387
sp|P84040|H4_DROME	P84040	H4_DROME	His4	Histone H4	706985	438191	744370	616430	1.13287e+06	747498
sp|P84051|H2A_DROME	P84051	H2A_DROME	His2A	Histone H2A	940641	823678	867991	588931	677651	573422
sp|P84345|ATP8_DROME	P84345	ATP8_DROME	mt:ATPase8	ATP synthase protein 8	988922	471983	903145	686481	765908	631677
sp|P91615|ADHR_DROME	P91615	ADHR_DROME	Adhr	Alcohol dehydrogenase-related 31 kDa protein	909963	815068	669470	695888	564471	789503
sp|P91660|L259_DROME	P91660	L259_DROME	l(2)03659	Probable multidrug resistance-associated protein lethal(2)03659	762653	788137	944199	645030	644625	668000
sp|P91682|SMO_DROME	P91682	SMO_DROME	smo	Protein smoothened	808394	641851	720267	795450	873279	604026
sp|P91875|RPA1_DROME	P91875	RPA1_DROME	RpI1	DNA-directed RNA polymerase I subunit RPA1	746434	765456	781380	724396	679682	739550
sp|P91926|AP2A_DROME	P91926	AP2A_DROME	AP-2alpha	AP-2 complex subunit alpha	743860	774809	732443	755703	733512	699363
sp|P91927|A60DA_DROME	P91927	A60DA_DROME	Letm1	LETM1 and EF-hand domain-containing protein anon-60Da, mitochondrial	858547	760623	649246	848402	545099	783429
sp|P91928|IMMT_DROME	P91928	IMMT_DROME	CG6455	Putative mitochondrial inner membrane protein	846458	788157	701314	783375	581936	747007
sp|P91931|DCAM_DROME	P91931	DCAM_DROME	SamDC	S-adenosylmethionine decarboxylase proenzyme	802713	669190	906276	660127	573471	819182
sp|P91938|TRXR1_DROME	P91938	TRXR1_DROME	Trxr-1	Thioredoxin reductase 1, mitochondrial	644128	872517	640932	838502	559124	869905
sp|P92177|1433E_DROME	P92177	1433E_DROME	14-3-3epsilon	14-3-3 protein epsilon	703290	741232	810013	612028	801873	752784
sp|P92192|LCP5_DROME	P92192	LCP5_DROME	Lcp65Ab1	Larval cuticle protein 5	680154	737283	634918	1.1431e+06	878217	404927
sp|P92201|LCP8_DROME	P92201	LCP8_DROME	Lcp65Ag1	Larval cuticle protein 8	649706	862427	778667	1.04598e+06	927801	239711
sp|P92204|NELFE_DROME	P92204	NELFE_DROME	Nelf-E	Negative elongation factor E	670286	274616	924133	399614	1.37235e+06	722065
sp|Q00174|LAMA_DROME	Q00174	LAMA_DROME	LanA	Laminin subunit alpha	536832	942018	682939	893046	552459	824956
sp|Q00449|MDR49_DROME	Q00449	MDR49_DROME	Mdr49	Multidrug resistance protein homolog 49	479534	1.10404e+06	302670	1.02005e+06	477679	1.02375e+06
sp|Q00637|SODM_DROME	Q00637	SODM_DROME	Sod2	Superoxide dismutase [Mn], mitochondrial	734524	805858	802253	761408	653075	691347
sp|Q00725|SGS4_DROME	Q00725	SGS4_DROME	Sgs4	Salivary glue protein Sgs-4	497150	1.00175e+06	414376	610578	1.61577e+06	291967
sp|Q00748|MDR65_DROME	Q00748	MDR65_DROME	Mdr65	Multidrug resistance protein homolog 65	500066	504285	942302	580915	1.23904e+06	626347
sp|Q01295-4|BRC1_DROME	Q01295-4	BRC1_DROME	br	Isoform 4 of Broad-complex core protein isoforms 1/2/3/4/5	519825	376031	630229	720829	1.50732e+06	616211
sp|Q01295-5|BRC1_DROME	Q01295-5	BRC1_DROME	br	Isoform 5 of Broad-complex core protein isoforms 1/2/3/4/5	1.01001e+06	347686	853442	604068	917512	689312
sp|Q01637|UMPS_DROME	Q01637	UMPS_DROME	r-l	Uridine 5'-monophosphate synthase	610013	869273	800729	694758	645295	806257
sp|Q01820|GCL_DROME	Q01820	GCL_DROME	gcl	Protein germ cell-less	796191	673891	575024	889514	745827	749759
sp|Q01989|MYS9_DROME	Q01989	MYS9_DROME	jar	Myosin heavy chain 95F	665930	748461	728601	782055	677499	818402
sp|Q02645-2|HTS_DROME	Q02645-2	HTS_DROME	hts	Isoform B of Protein hu-li tai shao	654024	696205	902707	698340	742437	733849
sp|Q02645-3|HTS_DROME	Q02645-3	HTS_DROME	hts	Isoform C of Protein hu-li tai shao	701803	486082	1.19626e+06	568711	874153	606363
sp|Q02910|CPN_DROME	Q02910	CPN_DROME	Cpn	Calphotin	586842	434956	1.4556e+06	412162	1.01259e+06	526788
sp|Q03042|KGP1_DROME	Q03042	KGP1_DROME	Pkg21D	cGMP-dependent protein kinase, isozyme 1	451491	1.02655e+06	372005	1.03756e+06	430463	1.08104e+06
sp|Q03043|KGP24_DROME	Q03043	KGP24_DROME	for	cGMP-dependent protein kinase, isozyme 2 forms cD4/T1/T3A/T3B	992751	533227	985176	548294	854061	542918
sp|Q03334|RS13_DROME	Q03334	RS13_DROME	RpS13	40S ribosomal protein S13	940908	651702	838754	656366	728136	637302
sp|Q03427|LAMC_DROME	Q03427	LAMC_DROME	LamC	Lamin-C	459647	1.06384e+06	549728	899038	470591	971729
sp|Q04047|NONA_DROME	Q04047	NONA_DROME	nonA	Protein no-on-transient A	673486	845214	623334	689898	785010	799964
sp|Q04164|SAS_DROME	Q04164	SAS_DROME	sas	Putative epidermal cell surface receptor	397903	639193	680084	696616	1.30867e+06	659952
sp|Q04448|MTDC_DROME	Q04448	MTDC_DROME	Nmdmc	Bifunctional methylenetetrahydrofolate dehydrogenase/cyclohydrolase, mitochondrial	528671	811189	606523	848520	729294	879563
sp|Q04652|KELC_DROME	Q04652	KELC_DROME	kel	Ring canal kelch protein	325900	920374	308416	1.45519e+06	309244	1.08628e+06
sp|Q04688|ELG_DROME	Q04688	ELG_DROME	Ets97D	DNA-binding protein Ets97D	660724	715798	764474	776299	920932	598858
sp|Q04691|FBP1_DROME	Q04691	FBP1_DROME	Fbp1	Fat-body protein 1	1.24598e+06	378297	491909	918504	951379	480305
sp|Q05344|SSRP1_DROME	Q05344	SSRP1_DROME	Ssrp	FACT complex subunit Ssrp1	560350	861772	657013	756665	781183	797964
sp|Q05652|KPEL_DROME	Q05652	KPEL_DROME	pll	Serine/threonine-protein kinase pelle	739907	771092	676599	829980	648811	768926
sp|Q05913|T2FA_DROME	Q05913	T2FA_DROME	TfIIFalpha	General transcription factor IIF subunit 1	642728	714878	679425	737283	716967	908713
sp|Q06559|RS3_DROME	Q06559	RS3_DROME	RpS3	40S ribosomal protein S3	975647	655041	848767	671503	652312	654685
sp|Q06849|ARL2_DROME	Q06849	ARL2_DROME	Arl2	ADP-ribosylation factor-like protein 2	562711	881178	614460	922800	618569	826219
sp|Q06943|HMGZ_DROME	Q06943	HMGZ_DROME	HmgZ	High mobility group protein Z	764364	350851	1.02599e+06	515392	1.01807e+06	724185
sp|Q07093|GCYH_DROME	Q07093	GCYH_DROME	Gycalpha99B	Head-specific guanylate cyclase	1.11899e+06	344721	967111	598572	834325	586520
sp|Q07171|GELS_DROME	Q07171	GELS_DROME	Gel	Gelsolin	935370	637380	788124	727092	788012	581760
sp|Q07886|DDX49_DROME	Q07886	DDX49_DROME	Dbp45A	Probable ATP-dependent RNA helicase Dbp45A	365282	653723	614450	550793	481206	1.6197e+06
sp|Q08012|DRK_DROME	Q08012	DRK_DROME	drk	Protein enhancer of sevenless 2B	1.00292e+06	631078	715408	668077	814964	618202
sp|Q08180|ICCR_DROME	Q08180	ICCR_DROME	rst	Irregular chiasm C-roughest protein	776370	598612	604670	643322	1.07829e+06	703845
sp|Q08473|SQD_DROME	Q08473	SQD_DROME	sqd	RNA-binding protein squid	779979	743013	856920	700933	730317	639074
sp|Q09332|UGGG_DROME	Q09332	UGGG_DROME	Ugt	UDP-glucose:glycoprotein glucosyltransferase	859697	766981	665425	747963	726252	680675
sp|Q0E9B6|RS11_DROME	Q0E9B6	RS11_DROME	RpS11	40S ribosomal protein S11	1.12779e+06	653866	868257	673613	501275	651446
sp|Q0E9G3|KTU_DROME	Q0E9G3	KTU_DROME	Nop17l	Protein kintoun	900153	601485	934999	699968	787632	538679
sp|Q0KHU5|PCAT1_DROME	Q0KHU5	PCAT1_DROME	CG32699	1-acylglycerophosphocholine O-acyltransferase 1	954063	671199	532181	925553	617926	746121
sp|Q0KHY3|MESH_DROME	Q0KHY3	MESH_DROME	mesh	Protein mesh	634163	821925	335753	1.07459e+06	531597	1.00632e+06
sp|Q0KI50|DMDD_DROME	Q0KI50	DMDD_DROME	Dys	Dystrophin, isoform D	578213	799070	603782	768058	817629	837354
sp|Q10714|ACE_DROME	Q10714	ACE_DROME	Ance	Angiotensin-converting enzyme	483706	919458	599065	852896	642054	910104
sp|Q1LZ08|WDR48_DROME	Q1LZ08	WDR48_DROME	CG9062	WD repeat-containing protein 48 homolog	629821	795515	750530	689129	812107	744402
sp|Q23972|SMG_DROME	Q23972	SMG_DROME	smg	Protein Smaug	617104	727486	534219	907835	602043	1.00539e+06
sp|Q23976|KU70_DROME	Q23976	KU70_DROME	Irbp	ATP-dependent DNA helicase 2 subunit 1	301503	1.17167e+06	375384	1.04152e+06	353925	1.14885e+06
sp|Q23979|MY61F_DROME	Q23979	MY61F_DROME	Myo61F	Myosin-IB	687971	989901	368823	954419	511589	914239
sp|Q23983|SNAP_DROME	Q23983	SNAP_DROME	Snap	Soluble NSF attachment protein	815088	725730	762352	741131	705857	693756
sp|Q23997|C5210_DROME	Q23997	C5210_DROME	CG5210	Chitinase-like protein CG5210	646035	668004	999231	729421	934490	477580
sp|Q24020|FLII_DROME	Q24020	FLII_DROME	fliI	Protein flightless-1	699017	742474	737198	764824	720530	763486
sp|Q24087|XPF_DROME	Q24087	XPF_DROME	mei-9	DNA repair endonuclease XPF	653008	711115	682733	686224	926282	750011
sp|Q24114|DALY_DROME	Q24114	DALY_DROME	dally	Division abnormally delayed protein	502744	833647	664840	737204	912464	757173
sp|Q24133|DNAJ1_DROME	Q24133	DNAJ1_DROME	DnaJ-1	DnaJ protein homolog 1	769560	607838	997143	604852	862274	599519
sp|Q24134|NELFD_DROME	Q24134	NELFD_DROME	TH1	Negative elongation factor D	694437	669274	759117	680296	928804	688121
sp|Q24145|SHARK_DROME	Q24145	SHARK_DROME	shark	Tyrosine-protein kinase shark	745089	705260	678778	723009	805540	762882
sp|Q24151-2|STAT_DROME	Q24151-2	STAT_DROME	Stat92E	Isoform C of Signal transducer and transcription activator	1.06698e+06	632694	750669	700188	706047	607557
sp|Q24157|BRN_DROME	Q24157	BRN_DROME	brn	Beta-1,3-galactosyltransferase brn	813824	826807	708538	445559	825687	795670
sp|Q24169|ORC5_DROME	Q24169	ORC5_DROME	Orc5	Origin recognition complex subunit 5	435220	896514	550614	879813	773773	865866
sp|Q24179|SLY1_DROME	Q24179	SLY1_DROME	Slh	Protein sly1 homolog	952594	639835	785799	665617	748204	656287
sp|Q24185|HOOK_DROME	Q24185	HOOK_DROME	hk	Protein hook	744832	710514	769656	799037	633913	775777
sp|Q24186|RS5A_DROME	Q24186	RS5A_DROME	RpS5a	40S ribosomal protein S5a	838697	805355	813314	713866	631617	656399
sp|Q24192|RHOL_DROME	Q24192	RHOL_DROME	RhoL	Ras-like GTP-binding protein RhoL	576215	925233	451575	886576	659242	910356
sp|Q24208|IF2G_DROME	Q24208	IF2G_DROME	eIF-2gamma	Eukaryotic translation initiation factor 2 subunit 3	861193	686033	836762	689845	671089	700756
sp|Q24210|CSKP_DROME	Q24210	CSKP_DROME	CASK	Peripheral plasma membrane protein CASK	557373	834364	532052	813654	781933	880889
sp|Q24212|STNB_DROME	Q24212	STNB_DROME	stnB	Protein stoned-B	495798	439269	746741	534381	1.40816e+06	733499
sp|Q24214|CANB2_DROME	Q24214	CANB2_DROME	CanB2	Calcineurin subunit B type 2	724978	739676	839740	709148	811895	619461
sp|Q24238|APH4_DROME	Q24238	APH4_DROME	Aph-4	Alkaline phosphatase 4	436130	975814	342659	1.13432e+06	301385	1.19855e+06
sp|Q24239|ANGEL_DROME	Q24239	ANGEL_DROME	angel	Protein angel	918610	567261	809266	687229	753416	701528
sp|Q24247|ITA1_DROME	Q24247	ITA1_DROME	mew	Integrin alpha-PS1	698215	781930	605964	864859	767467	715288
sp|Q24251|ATP5H_DROME	Q24251	ATP5H_DROME	ATPsyn-d	ATP synthase subunit d, mitochondrial	1.05302e+06	684383	751840	683920	667266	624768
sp|Q24276|CDC37_DROME	Q24276	CDC37_DROME	Cdc37	Hsp90 co-chaperone Cdc37	859556	600320	875850	718890	771813	622235
sp|Q24292|DS_DROME	Q24292	DS_DROME	ds	Protein dachsous	446895	639656	587569	584650	1.42055e+06	689147
sp|Q24297|RUXF_DROME	Q24297	RUXF_DROME	SmF	Small nuclear ribonucleoprotein F	542620	937972	532546	867156	617538	913454
sp|Q24298|CADE_DROME	Q24298	CADE_DROME	shg	DE-cadherin	589055	653122	609253	640956	1.22391e+06	676497
sp|Q24307|IAP2_DROME	Q24307	IAP2_DROME	Iap2	Apoptosis 2 inhibitor	953489	668308	756751	733962	674446	667141
sp|Q24311|CUL1_DROME	Q24311	CUL1_DROME	lin19	Cullin homolog 1	767725	707507	838200	684472	767711	673964
sp|Q24314|VPS18_DROME	Q24314	VPS18_DROME	dor	Vacuolar protein sorting-associated protein 18 homolog	848280	700695	706345	743790	715890	723391
sp|Q24317|PRI1_DROME	Q24317	PRI1_DROME	DNApol-alpha50	DNA primase small subunit	340787	1.11558e+06	452481	969168	544466	982129
sp|Q24318|TFDP_DROME	Q24318	TFDP_DROME	Dp	Transcription factor Dp	1.0567e+06	126094	1.23096e+06	191048	1.65647e+06	178292
sp|Q24319|OST48_DROME	Q24319	OST48_DROME	Ost48	Dolichyl-diphosphooligosaccharide--protein glycosyltransferase 48 kDa subunit	811485	802096	672551	767110	695316	697654
sp|Q24323|SEM2A_DROME	Q24323	SEM2A_DROME	Sema-2a	Semaphorin-2A	432427	651351	556748	716865	1.33751e+06	682728
sp|Q24324|DSOR1_DROME	Q24324	DSOR1_DROME	Dsor1	Dual specificity mitogen-activated protein kinase kinase dSOR1	727912	733686	756247	764363	728504	723706
sp|Q24338|ESC_DROME	Q24338	ESC_DROME	esc	Polycomb protein esc	515743	923909	547865	891311	655180	879008
sp|Q24342|FNG_DROME	Q24342	FNG_DROME	fng	Fringe glycosyltransferase	715309	752435	656995	707897	867955	721862
sp|Q24368|ISWI_DROME	Q24368	ISWI_DROME	Iswi	Chromatin-remodeling complex ATPase chain Iswi	516003	721131	620461	699240	1.12919e+06	709108
sp|Q24372|LACH_DROME	Q24372	LACH_DROME	Lac	Lachesin	607463	801693	573891	826674	884761	724860
sp|Q24388|LSP2_DROME	Q24388	LSP2_DROME	Lsp2	Larval serum protein 2	786266	200393	1.40774e+06	340856	1.44246e+06	260401
sp|Q24407|ATP5J_DROME	Q24407	ATP5J_DROME	ATPsyn-Cf6	ATP synthase-coupling factor 6, mitochondrial	1.07841e+06	579022	1.02641e+06	523051	671886	588920
sp|Q24434|ORD_DROME	Q24434	ORD_DROME	ord	Protein ORD	754867	761834	869864	692052	641980	722371
sp|Q24439|ATPO_DROME	Q24439	ATPO_DROME	Oscp	ATP synthase subunit O, mitochondrial	987068	655577	781941	694705	668095	667584
sp|Q24451|MAN2_DROME	Q24451	MAN2_DROME	alpha-Man-II	Alpha-mannosidase 2	682283	792712	735670	732527	826899	665734
sp|Q24472|RBF_DROME	Q24472	RBF_DROME	Rbf	Retinoblastoma family protein	659563	797697	640228	763081	781417	777992
sp|Q24478|CP190_DROME	Q24478	CP190_DROME	Cp190	Centrosome-associated zinc finger protein CP190	725056	432777	813780	546913	1.15867e+06	712780
sp|Q24491|RX21_DROME	Q24491	RX21_DROME	Rsf1	RNA-binding protein Rsf1	745939	676810	720620	547420	1.10388e+06	622500
sp|Q24492|RFA1_DROME	Q24492	RFA1_DROME	RpA-70	Replication protein A 70 kDa DNA-binding subunit	460062	1.02466e+06	583246	844330	636520	868065
sp|Q24498-3|RY44_DROME	Q24498-3	RY44_DROME	Rya-r44F	Isoform B of Ryanodine receptor 44F	470433	1.70969e+06	444974	890428	445748	545822
sp|Q24522|BUN1_DROME	Q24522	BUN1_DROME	bun	Protein bunched, class 1/class 3/D/E isoforms	692573	688206	691293	789434	786169	771499
sp|Q24523|BUN2_DROME	Q24523	BUN2_DROME	bun	Protein bunched, class 2/F/G isoform	829988	335255	1.05274e+06	473689	1.03991e+06	675205
sp|Q24536|SSL_DROME	Q24536	SSL_DROME	Ssl	Suppressor-of-stellate-like protein	842673	598012	1.29308e+06	569348	846004	340040
sp|Q24547|STX1A_DROME	Q24547	STX1A_DROME	Syx1A	Syntaxin-1A	582127	759491	672312	804492	726157	862414
sp|Q24560|TBB1_DROME	Q24560	TBB1_DROME	betaTub56D	Tubulin beta-1 chain	635830	766572	805381	743658	762302	716709
sp|Q24564|MERH_DROME	Q24564	MERH_DROME	Mer	Moesin/ezrin/radixin homolog 2	765595	709860	743439	704583	774332	731450
sp|Q24574|UBPE_DROME	Q24574	UBPE_DROME	Ubp64E	Ubiquitin carboxyl-terminal hydrolase 64E	821495	802275	724476	712476	677447	707679
sp|Q24583|VATF1_DROME	Q24583	VATF1_DROME	Vha14-1	V-type proton ATPase subunit F 1	635304	803746	482039	826409	622922	1.02101e+06
sp|Q24592|JAK_DROME	Q24592	JAK_DROME	hop	Tyrosine-protein kinase hopscotch	744740	664379	745581	688137	941730	643628
sp|Q24595|XPC_DROME	Q24595	XPC_DROME	mus210	DNA repair protein complementing XP-C cells homolog	481646	754617	511097	907496	712863	1.0121e+06
sp|Q26365|ADT_DROME	Q26365	ADT_DROME	sesB	ADP,ATP carrier protein	846256	826384	617299	846212	518673	792482
sp|Q26454|MCM4_DROME	Q26454	MCM4_DROME	dpa	DNA replication licensing factor MCM4	480810	780903	656122	745831	995486	742418
sp|Q27237|TID_DROME	Q27237	TID_DROME	l(2)tid	Protein tumorous imaginal discs, mitochondrial	1.02657e+06	671907	757928	714333	590601	697005
sp|Q27268|DX39B_DROME	Q27268	DX39B_DROME	Hel25E	ATP-dependent RNA helicase WM6	752872	691993	859116	654044	863964	617932
sp|Q27272|TAF9_DROME	Q27272	TAF9_DROME	e(y)1	Transcription initiation factor TFIID subunit 9	707255	590888	734940	632752	1.00891e+06	729351
sp|Q27294|CAZ_DROME	Q27294	CAZ_DROME	caz	RNA-binding protein cabeza	852149	445538	962256	483614	1.11341e+06	566052
sp|Q27297|RAD51_DROME	Q27297	RAD51_DROME	spn-A	DNA repair protein Rad51 homolog	607738	732948	660165	739630	750806	905705
sp|Q27333|NT56_DROME	Q27333	NT56_DROME	l(2)not	Lethal(2)neighbour of tid protein	818653	728336	747292	661169	774123	705913
sp|Q27415|NLP_DROME	Q27415	NLP_DROME	Nlp	Nucleoplasmin-like protein	460833	967208	576531	844638	551529	999268
sp|Q27421|OSP_DROME	Q27421	OSP_DROME	osp	Protein outspread	735864	836782	669145	661306	779729	745475
sp|Q27580|SAHH_DROME	Q27580	SAHH_DROME	Ahcy13	Adenosylhomocysteinase	868165	837864	556175	926679	392569	865654
sp|Q27589|CP4D2_DROME	Q27589	CP4D2_DROME	Cyp4d2	Cytochrome P450 4d2	1.15842e+06	564017	649698	816167	616445	660134
sp|Q27591|ITBN_DROME	Q27591	ITBN_DROME	Itgbetanu	Integrin beta-nu	932981	389005	852829	733950	1.10447e+06	436295
sp|Q27593|CP6A8_DROME	Q27593	CP6A8_DROME	Cyp6a8	Cytochrome P450 6a8	95422.4	1.295e+06	91677	1.42552e+06	75801.7	1.39117e+06
sp|Q27594|CP6A9_DROME	Q27594	CP6A9_DROME	Cyp6a9	Cytochrome P450 6a9	1.4829e+06	376792	554741	475886	1.08617e+06	481856
sp|Q27601|PUR1_DROME	Q27601	PUR1_DROME	Prat	Amidophosphoribosyltransferase	821642	530804	945439	670989	877983	594189
sp|Q27606|CP4E2_DROME	Q27606	CP4E2_DROME	Cyp4e2	Cytochrome P450 4e2	1.18087e+06	422599	1.0053e+06	630283	754372	485352
sp|Q27607|DPOG1_DROME	Q27607	DPOG1_DROME	tam	DNA polymerase subunit gamma-1, mitochondrial	681793	799049	698518	754944	666106	822391
sp|Q27869|PIMT_DROME	Q27869	PIMT_DROME	Pcmt	Protein-L-isoaspartate(D-aspartate) O-methyltransferase	632667	855054	732396	827756	644875	745613
sp|Q2PE14|ZCHC8_DROME	Q2PE14	ZCHC8_DROME	CG4622	Zinc finger CCHC domain-containing protein 8 homolog	781123	645604	819076	648758	834987	698583
sp|Q32KD2|SETB1_DROME	Q32KD2	SETB1_DROME	egg	Histone-lysine N-methyltransferase eggless	649596	730334	776915	701327	946595	624981
sp|Q45VV3|YORKI_DROME	Q45VV3	YORKI_DROME	yki	Protein yorkie	738057	597226	640560	659956	967311	794644
sp|Q4V6M7|UFSP1_DROME	Q4V6M7	UFSP1_DROME	UFSP1	Probable Ufm1-specific protease 1	906556	540887	1.10696e+06	574782	883332	454364
sp|Q4Z8K6|RBP9X_DROME	Q4Z8K6	RBP9X_DROME	RanBPM	Ran-binding proteins 9/10 homolog	825800	664855	769718	702204	802523	672669
sp|Q5EAK6|ATM_DROME	Q5EAK6	ATM_DROME	tefu	Serine/threonine-protein kinase ATM	331116	1.1489e+06	405358	993285	488271	1.03422e+06
sp|Q5LJP9|ASND1_DROME	Q5LJP9	ASND1_DROME	CG17486	Asparagine synthetase domain-containing protein CG17486	849565	582279	929866	706562	698078	678057
sp|Q6AWG9|Y5098_DROME	Q6AWG9	Y5098_DROME	CG5098	Uncharacterized protein CG5098	759647	377270	882506	518127	1.06119e+06	786273
sp|Q6AWJ9|PTK7_DROME	Q6AWJ9	PTK7_DROME	otk	Tyrosine-protein kinase-like otk	518938	522985	602067	608126	1.50092e+06	620046
sp|Q6AWN0|MTND_DROME	Q6AWN0	MTND_DROME	CG32068	1,2-dihydroxy-3-keto-5-methylthiopentene dioxygenase	923260	583460	959183	789363	706391	513572
sp|Q6NN40|NTM1_DROME	Q6NN40	NTM1_DROME	Ntmt	Alpha N-terminal protein methyltransferase 1	912392	676816	789786	741211	636853	694478
sp|Q6WV17|GALT5_DROME	Q6WV17	GALT5_DROME	pgant5	Polypeptide N-acetylgalactosaminyltransferase 5	683665	923363	663091	652550	859154	655693
sp|Q6WV17-2|GALT5_DROME	Q6WV17-2	GALT5_DROME	pgant5	Isoform B of Polypeptide N-acetylgalactosaminyltransferase 5	708086	775238	594086	542547	999649	780432
sp|Q6WV19|GALT2_DROME	Q6WV19	GALT2_DROME	pgant2	Polypeptide N-acetylgalactosaminyltransferase 2	786318	874258	387014	456617	705048	1.15541e+06
sp|Q6WV20|GALT1_DROME	Q6WV20	GALT1_DROME	GalNAc-T1	Polypeptide N-acetylgalactosaminyltransferase 1	694953	1.00138e+06	661490	494003	960795	622891
sp|Q70PP2|SMG1_DROME	Q70PP2	SMG1_DROME	nonC	Serine/threonine-protein kinase Smg1	729364	815360	708593	736504	701294	744013
sp|Q70PY2|PGSB1_DROME	Q70PY2	PGSB1_DROME	PGRP-SB1	Peptidoglycan-recognition protein SB1	705944	701839	642721	808963	842131	722267
sp|Q7JQW6|LIAS_DROME	Q7JQW6	LIAS_DROME	Las	Lipoyl synthase, mitochondrial	826795	891282	529548	871008	389421	928094
sp|Q7JUR6|GDAP2_DROME	Q7JUR6	GDAP2_DROME	CG18812	Protein GDAP2 homolog	676017	902537	425481	541493	698611	1.12436e+06
sp|Q7JUX9|MRRP1_DROME	Q7JUX9	MRRP1_DROME	trmt10c	Mitochondrial ribonuclease P protein 1 homolog	680419	823544	597761	804989	610287	898443
sp|Q7JVI3|EIF3M_DROME	Q7JVI3	EIF3M_DROME	Tango7	Eukaryotic translation initiation factor 3 subunit M	900754	691280	822792	668989	731713	637191
sp|Q7JW12|TMX2_DROME	Q7JW12	TMX2_DROME	CG11007	Thioredoxin-related transmembrane protein 2 homolog	682448	828525	702629	740683	648529	822173
sp|Q7JW27|WASH1_DROME	Q7JW27	WASH1_DROME	wash	WAS protein family homolog 1	825122	583775	900479	659378	746492	717132
sp|Q7JWD3|ASNA_DROME	Q7JWD3	ASNA_DROME	CG1598	ATPase ASNA1 homolog	909159	653793	846437	699965	662322	679262
sp|Q7JWG9|RM52_DROME	Q7JWG9	RM52_DROME	mRpL52	39S ribosomal protein L52, mitochondrial	1.01301e+06	480389	1.07585e+06	559533	722876	604667
sp|Q7JWR9|ZC3HF_DROME	Q7JWR9	ZC3HF_DROME	CG8635	Zinc finger CCCH domain-containing protein 15 homolog	940424	631476	870665	644366	685297	677076
sp|Q7JWW5|CTU1_DROME	Q7JWW5	CTU1_DROME	CG8078	Cytoplasmic tRNA 2-thiolation protein 1	827273	594429	925835	633030	821991	637294
sp|Q7JYV7|KAD6_DROME	Q7JYV7	KAD6_DROME	Ak6	Adenylate kinase isoenzyme 6 homolog	773135	589650	927898	613060	853174	672212
sp|Q7JZM8|RM41_DROME	Q7JZM8	RM41_DROME	mRpL41	39S ribosomal protein L41, mitochondrial	956663	713559	882112	633590	654006	623779
sp|Q7JZV0|LCP2A_DROME	Q7JZV0	LCP2A_DROME	Cpr47Eg	Cuticular protein 47Eg	833937	278818	794722	1.08092e+06	1.05932e+06	407630
sp|Q7K0E3|MOB4_DROME	Q7K0E3	MOB4_DROME	Mob4	MOB kinase activator-like 4	679418	763004	720574	634534	826367	788979
sp|Q7K0P4|PGAP3_DROME	Q7K0P4	PGAP3_DROME	PGAP3	Post-GPI attachment to proteins factor 3	639551	777257	594276	940534	582008	885194
sp|Q7K0Y1|BOP1_DROME	Q7K0Y1	BOP1_DROME	CG5033	Ribosome biogenesis protein BOP1 homolog	661118	842281	653863	794894	670261	804002
sp|Q7K175|HENMT_DROME	Q7K175	HENMT_DROME	Hen1	Small RNA 2'-O-methyltransferase	753410	731226	770955	674878	720995	774752
sp|Q7K1Y4|CIAO1_DROME	Q7K1Y4	CIAO1_DROME	Ciao1	Probable cytosolic iron-sulfur protein assembly protein Ciao1	889618	722637	730913	755858	610606	737314
sp|Q7K1Z5|UFC1_DROME	Q7K1Z5	UFC1_DROME	CG8386	Ubiquitin-fold modifier-conjugating enzyme 1	927529	665108	847429	669389	691765	652454
sp|Q7K284|CLP1_DROME	Q7K284	CLP1_DROME	cbc	Protein CLP1 homolog	798986	772630	638195	725146	829322	673222
sp|Q7K2B0|RRP8_DROME	Q7K2B0	RRP8_DROME	CG7137	Ribosomal RNA-processing protein 8	718021	836942	804809	697316	676236	709706
sp|Q7K2D2|DCTN2_DROME	Q7K2D2	DCTN2_DROME	Dmn	Probable dynactin subunit 2	710139	724263	745807	752299	743510	751418
sp|Q7K2G1-2|ADRM1_DROME	Q7K2G1-2	ADRM1_DROME	Rpn13	Isoform 2 of Proteasomal ubiquitin receptor ADRM1 homolog	868139	478495	887471	569216	839333	770498
sp|Q7K2Y9|NTAQ1_DROME	Q7K2Y9	NTAQ1_DROME	tun	Protein N-terminal glutamine amidohydrolase	699797	718687	654357	793210	815644	741244
sp|Q7K486|ARMC6_DROME	Q7K486	ARMC6_DROME	CG5721	Armadillo repeat-containing protein 6 homolog	748073	773678	704961	696608	750560	754437
sp|Q7K4B3|ELP2_DROME	Q7K4B3	ELP2_DROME	Elp2	Probable elongator complex protein 2	805101	656038	950434	682964	718229	637232
sp|Q7K4V4|AKTP1_DROME	Q7K4V4	AKTP1_DROME	cbx	Protein crossbronx	671729	805075	728382	759675	693653	770735
sp|Q7K4W1|CDKAL_DROME	Q7K4W1	CDKAL_DROME	CG6550	Threonylcarbamoyladenosine tRNA methylthiotransferase	966672	667062	855382	658355	678821	633048
sp|Q7K550|EIF3J_DROME	Q7K550	EIF3J_DROME	Adam	Eukaryotic translation initiation factor 3 subunit J	848065	674016	890058	665890	678030	689951
sp|Q7K5N4|CALYP_DROME	Q7K5N4	CALYP_DROME	calypso	Ubiquitin carboxyl-terminal hydrolase calypso	622804	744185	789091	615253	992739	655261
sp|Q7K7A9|FEN1_DROME	Q7K7A9	FEN1_DROME	Fen1	Flap endonuclease 1	667836	821710	642659	691451	831699	763160
sp|Q7KBL8|MED29_DROME	Q7KBL8	MED29_DROME	ix	Mediator of RNA polymerase II transcription subunit 29	646561	576447	736160	792531	827843	822887
sp|Q7KKH3|SDA1_DROME	Q7KKH3	SDA1_DROME	Mys45A	Protein SDA1 homolog	617210	782411	835624	745701	729282	721953
sp|Q7KLV9|PSD11_DROME	Q7KLV9	PSD11_DROME	Rpn6	26S proteasome non-ATPase regulatory subunit 11	815982	683369	885919	669657	738782	652790
sp|Q7KML2|ACOX1_DROME	Q7KML2	ACOX1_DROME	CG5009	Probable peroxisomal acyl-coenzyme A oxidase 1	1.08643e+06	617950	812863	718867	554178	675460
sp|Q7KN62|TERA_DROME	Q7KN62	TERA_DROME	TER94	Transitional endoplasmic reticulum ATPase TER94	801350	791549	681072	774930	629474	761830
sp|Q7KN62-3|TERA_DROME	Q7KN62-3	TERA_DROME	TER94	Isoform C of Transitional endoplasmic reticulum ATPase TER94	720171	671515	1.16326e+06	588102	977808	352969
sp|Q7KN79|LTV1_DROME	Q7KN79	LTV1_DROME	CG7686	Protein LTV1 homolog	804621	524977	1.0562e+06	578378	728576	735152
sp|Q7KN90|SYCC_DROME	Q7KN90	SYCC_DROME	Aats-cys	Cysteine--tRNA ligase, cytoplasmic	738401	857760	668612	730318	618089	817641
sp|Q7KNA0|DYM_DROME	Q7KNA0	DYM_DROME	CG8230	Dymeclin	788109	767077	854691	691055	777313	579134
sp|Q7KNS3|LIS1_DROME	Q7KNS3	LIS1_DROME	Lis-1	Lissencephaly-1 homolog	811538	626911	815257	636488	908302	634802
sp|Q7KQM6|PERQ1_DROME	Q7KQM6	PERQ1_DROME	CG11148	PERQ amino acid-rich with GYF domain-containing protein CG11148	847151	488209	890951	641533	818929	734532
sp|Q7KQZ4|LOLA3_DROME	Q7KQZ4	LOLA3_DROME	lola	Longitudinals lacking protein, isoforms A/B/D/L	682975	487294	796192	589274	1.0363e+06	794636
sp|Q7KR04|RS15B_DROME	Q7KR04	RS15B_DROME	RpS15Ab	40S ribosomal protein S15Ab	524781	775076	743128	717682	841906	802678
sp|Q7KRR5|NGLY1_DROME	Q7KRR5	NGLY1_DROME	Pngl	Peptide-N(4)-(N-acetyl-beta-glucosaminyl)asparagine amidase	693701	876135	664758	687054	590700	904467
sp|Q7KRW8|PRP39_DROME	Q7KRW8	PRP39_DROME	CG1646	Pre-mRNA-processing factor 39	773669	677422	859769	588000	929937	607096
sp|Q7KRW8-6|PRP39_DROME	Q7KRW8-6	PRP39_DROME	CG1646	Isoform H of Pre-mRNA-processing factor 39	534341	1.28838e+06	418465	596723	423607	1.13447e+06
sp|Q7KS38|RS19B_DROME	Q7KS38	RS19B_DROME	RpS19b	40S ribosomal protein S19b	797962	762096	1.10474e+06	695110	649256	476979
sp|Q7KSC4|MPC1_DROME	Q7KSC4	MPC1_DROME	Mpc1	Mitochondrial pyruvate carrier 1	918951	612804	1.15482e+06	646672	608636	536987
sp|Q7KT91|C3390_DROME	Q7KT91	C3390_DROME	CG33090	Non-lysosomal glucosylceramidase	588678	876032	746981	812076	616638	791433
sp|Q7KUT2|LONM_DROME	Q7KUT2	LONM_DROME	Lon	Lon protease homolog, mitochondrial	701699	863011	645855	806834	503830	904024
sp|Q7KVA1|XYLT_DROME	Q7KVA1	XYLT_DROME	oxt	Xylosyltransferase oxt	761444	688342	679874	751209	715462	822020
sp|Q7KVQ0|GAR1_DROME	Q7KVQ0	GAR1_DROME	CG4038	Probable H/ACA ribonucleoprotein complex subunit 1	768038	772095	678417	711703	715725	781386
sp|Q7KW39|MMSA_DROME	Q7KW39	MMSA_DROME	CG17896	Probable methylmalonate-semialdehyde dehydrogenase [acylating], mitochondrial	843343	821200	486213	973239	430075	885586
sp|Q7PLI7|DCLK_DROME	Q7PLI7	DCLK_DROME	CG17528	Serine/threonine-protein kinase CG17528	681613	722796	747839	758579	804658	712558
sp|Q7PLK0|AGO3_DROME	Q7PLK0	AGO3_DROME	AGO3	Protein argonaute-3	589694	978700	697833	811115	602460	761137
sp|Q7PLS8|INT3_DROME	Q7PLS8	INT3_DROME	IntS3	Integrator complex subunit 3 homolog	683236	775630	671661	784845	793678	720241
sp|Q7YU24|MARF_DROME	Q7YU24	MARF_DROME	Marf	Transmembrane GTPase Marf	774539	806201	660727	738932	698453	755734
sp|Q7YZA2|Y7065_DROME	Q7YZA2	Y7065_DROME	CG7065	Uncharacterized protein CG7065	679113	721759	844672	709713	794222	683869
sp|Q868Z9|PPN_DROME	Q868Z9	PPN_DROME	Ppn	Papilin	534787	1.00267e+06	751905	813901	493984	838450
sp|Q86B47|Y8611_DROME	Q86B47	Y8611_DROME	CG8611	Probable ATP-dependent RNA helicase CG8611	664690	784177	708406	710150	678402	866917
sp|Q86B79|UNK_DROME	Q86B79	UNK_DROME	unk	RING finger protein unkempt	652554	588972	721561	666445	1.07671e+06	696278
sp|Q86B87|MMD4_DROME	Q86B87	MMD4_DROME	mod(mdg4)	Modifier of mdg4	743707	584122	703958	692684	1.01267e+06	677171
sp|Q86B87-13|MMD4_DROME	Q86B87-13	MMD4_DROME	mod(mdg4)	Isoform 55.6 of Modifier of mdg4	564614	710761	580468	742577	1.03511e+06	762135
sp|Q86BA1|MICAL_DROME	Q86BA1	MICAL_DROME	Mical	Protein-methionine sulfoxide oxidase Mical	626566	1.15778e+06	553881	690659	752104	668024
sp|Q86BJ3-2|PIPE_DROME	Q86BJ3-2	PIPE_DROME	pip	Isoform 2 of Heparan sulfate 2-O-sulfotransferase pipe	634969	1.13481e+06	546306	569886	453604	1.06493e+06
sp|Q86BJ3-5|PIPE_DROME	Q86BJ3-5	PIPE_DROME	pip	Isoform 5 of Heparan sulfate 2-O-sulfotransferase pipe	579752	1.20062e+06	495172	656641	378547	1.09555e+06
sp|Q86BL4|GATC_DROME	Q86BL4	GATC_DROME	CG33649	Glutamyl-tRNA(Gln) amidotransferase subunit C, mitochondrial	862993	722280	758073	821077	553965	733706
sp|Q86BN8|PTPM1_DROME	Q86BN8	PTPM1_DROME	Plip	Phosphatidylglycerophosphatase and protein-tyrosine phosphatase 1	842616	705306	822341	712574	645388	716941
sp|Q86BS6-3|METL_DROME	Q86BS6-3	METL_DROME	metl	Isoform 3 of Methyltransferase-like protein	839209	690954	806534	692300	704671	707438
sp|Q86BY9|RIG_DROME	Q86BY9	RIG_DROME	rig	Protein rigor mortis	620509	833588	708935	740133	779015	743433
sp|Q86NP2|NELFA_DROME	Q86NP2	NELFA_DROME	Nelf-A	Negative elongation factor A	782246	690058	804835	653609	641451	847848
sp|Q86PC9|TULP_DROME	Q86PC9	TULP_DROME	ktub	Protein king tubby	640169	653237	932729	702713	933405	574980
sp|Q8I0G5|COPG_DROME	Q8I0G5	COPG_DROME	gammaCop	Coatomer subunit gamma	855798	721199	748209	689067	759256	670581
sp|Q8I0P1|SPAST_DROME	Q8I0P1	SPAST_DROME	spas	Spastin	1.04307e+06	484708	677006	941732	578952	726491
sp|Q8IFW4|THIOT_DROME	Q8IFW4	THIOT_DROME	TrxT	Thioredoxin-T	716004	593852	1.36462e+06	561936	852275	387499
sp|Q8IGJ0|EFR3_DROME	Q8IGJ0	EFR3_DROME	stmA	Protein EFR3 homolog cmp44E	577142	892301	614972	818952	673660	841434
sp|Q8IH00|NOL6_DROME	Q8IH00	NOL6_DROME	Mat89Ba	Nucleolar protein 6	661523	837950	665441	781832	650389	826822
sp|Q8IMX7|MIRO_DROME	Q8IMX7	MIRO_DROME	Miro	Mitochondrial Rho GTPase	748893	699788	771779	750583	680663	777225
sp|Q8IN43|TOTC_DROME	Q8IN43	TOTC_DROME	TotC	Protein Turandot C	619837	623100	906117	862835	874852	558324
sp|Q8IN44|TOTA_DROME	Q8IN44	TOTA_DROME	TotA	Protein Turandot A	648644	328225	1.34885e+06	587545	1.09021e+06	435426
sp|Q8INB9|AKT1_DROME	Q8INB9	AKT1_DROME	Akt1	RAC serine/threonine-protein kinase	710836	723088	754285	683036	846759	707598
sp|Q8INF2|TAM41_DROME	Q8INF2	TAM41_DROME	CG33331	Mitochondrial translocator assembly and maintenance protein 41 homolog	908746	658127	769179	769189	632342	711111
sp|Q8INI8|HSP72_DROME	Q8INI8	HSP72_DROME	Hsp70Ba	Major heat shock 70 kDa protein Ba	197913	611598	215292	1.21256e+06	245493	1.79195e+06
sp|Q8INK9|MSRB_DROME	Q8INK9	MSRB_DROME	SelR	Methionine-R-sulfoxide reductase B1	602884	722215	614552	1.01237e+06	471765	985189
sp|Q8INM3|SLE_DROME	Q8INM3	SLE_DROME	sle	Protein slender lobes	535199	826783	743547	772094	736792	802032
sp|Q8INQ7|KTAP2_DROME	Q8INQ7	KTAP2_DROME	CG31460	Protein KRTCAP2 homolog	453138	962833	613134	787437	964834	643954
sp|Q8INR6|DOT1L_DROME	Q8INR6	DOT1L_DROME	gpp	Histone-lysine N-methyltransferase, H3 lysine-79 specific	737059	725071	677221	710387	885039	691486
sp|Q8INT5|DAAF1_DROME	Q8INT5	DAAF1_DROME	dtr	Dynein assembly factor 1, axonemal homolog	561988	600770	1.23006e+06	673733	975087	415469
sp|Q8IPK4|GLT25_DROME	Q8IPK4	GLT25_DROME	CG31915	Glycosyltransferase 25 family member	683240	711178	864681	708104	622014	832899
sp|Q8IQ56|TMM11_DROME	Q8IQ56	TMM11_DROME	Pmi	Transmembrane protein 11 homolog, mitochondrial	1.07734e+06	626307	733362	760974	605301	660911
sp|Q8IQF1|MOCS1_DROME	Q8IQF1	MOCS1_DROME	Mocs1	Molybdenum cofactor biosynthesis protein 1	608626	1.03338e+06	470202	955264	354806	1.00151e+06
sp|Q8IRE4|TRM5_DROME	Q8IRE4	TRM5_DROME	CG32281	tRNA (guanine(37)-N1)-methyltransferase	718910	796228	703592	760314	609875	837267
sp|Q8IRG6|SPT16_DROME	Q8IRG6	SPT16_DROME	dre4	FACT complex subunit spt16	563695	867694	721815	750283	816723	707531
sp|Q8IRJ8|THOC7_DROME	Q8IRJ8	THOC7_DROME	thoc7	THO complex protein 7	790977	761966	680241	665662	801816	728570
sp|Q8IRR5|SIR4_DROME	Q8IRR5	SIR4_DROME	Sirt4	NAD-dependent protein deacetylase Sirt4	1.14518e+06	511221	853021	562868	735540	645447
sp|Q8IRW8-2|TRR_DROME	Q8IRW8-2	TRR_DROME	trr	Isoform 2 of Histone-lysine N-methyltransferase trr	674235	602364	643508	728590	1.025e+06	729137
sp|Q8IRY7|CASP8_DROME	Q8IRY7	CASP8_DROME	Dredd	Caspase-8	904170	653962	844916	661948	715737	667245
sp|Q8MKL1|U598_DROME	Q8MKL1	U598_DROME	CG30010	UPF0598 protein CG30010	750632	819526	564828	1.00104e+06	481038	825797
sp|Q8MKN0|COQ9_DROME	Q8MKN0	COQ9_DROME	Coq9	Ubiquinone biosynthesis protein COQ9, mitochondrial	762306	911353	587123	875932	493779	814817
sp|Q8MKW7|RNZ_DROME	Q8MKW7	RNZ_DROME	JhI-1	Ribonuclease Z, mitochondrial	802688	802716	800313	588868	685359	755327
sp|Q8ML70|IM10_DROME	Q8ML70	IM10_DROME	IM10	Immune-induced peptides	824783	503059	1.08777e+06	506351	883670	627177
sp|Q8MLL3|COQ10_DROME	Q8MLL3	COQ10_DROME	Coq10	Coenzyme Q-binding protein COQ10, mitochondrial	720480	759878	840595	731088	684128	705338
sp|Q8MLV1|LBR_DROME	Q8MLV1	LBR_DROME	LBR	Lamin-B receptor	492714	696323	604165	716718	1.1232e+06	753602
sp|Q8MLY8|RS8_DROME	Q8MLY8	RS8_DROME	RpS8	40S ribosomal protein S8	886515	727242	724897	768456	647788	696125
sp|Q8MLZ7|IDGF3_DROME	Q8MLZ7	IDGF3_DROME	Idgf3	Chitinase-like protein Idgf3	665807	888073	625211	666398	1.03048e+06	561821
sp|Q8MM24|IDGF1_DROME	Q8MM24	IDGF1_DROME	Idgf1	Chitinase-like protein Idgf1	189641	1.26421e+06	232503	1.58688e+06	409426	773789
sp|Q8MMC4|CDV3_DROME	Q8MMC4	CDV3_DROME	CG3760	Protein CDV3 homolog	878207	283723	1.10121e+06	473325	845535	817061
sp|Q8MR45|ASPG1_DROME	Q8MR45	ASPG1_DROME	CG1827	Putative N(4)-(beta-N-acetylglucosaminyl)-L-asparaginase CG1827	914328	566067	796070	664326	946687	557830
sp|Q8MR62|VIAF1_DROME	Q8MR62	VIAF1_DROME	viaf	Viral IAP-associated factor homolog	646127	827621	635696	811645	562257	929825
sp|Q8MRC9|GALT9_DROME	Q8MRC9	GALT9_DROME	pgant9	Putative polypeptide N-acetylgalactosaminyltransferase 9	588445	976640	536772	726244	917443	681506
sp|Q8MRQ4|LMBD2_DROME	Q8MRQ4	LMBD2_DROME	CG8135	LMBR1 domain-containing protein 2 homolog	935880	659483	749169	668531	860289	578817
sp|Q8MS27|RM35_DROME	Q8MS27	RM35_DROME	mRpL35	39S ribosomal protein L35, mitochondrial	837076	847944	814556	412093	676379	834956
sp|Q8MSG8|APTX_DROME	Q8MSG8	APTX_DROME	CG5316	Aprataxin-like protein	739066	621151	929182	744756	776315	632862
sp|Q8MSS1|LVA_DROME	Q8MSS1	LVA_DROME	lva	Protein lava lamp	914275	619973	894824	589742	806263	621854
sp|Q8MSU3|FRRS1_DROME	Q8MSU3	FRRS1_DROME	CG8399	Putative ferric-chelate reductase 1 homolog	446412	1.05723e+06	587392	351798	880779	1.03904e+06
sp|Q8MSU4|SYMPK_DROME	Q8MSU4	SYMPK_DROME	Sym	Symplekin	637348	773568	632225	762123	860964	750401
sp|Q8MSV2|SHEP_DROME	Q8MSV2	SHEP_DROME	shep	Protein alan shepard	841071	709229	805688	738930	632859	718473
sp|Q8MSY4|VPS51_DROME	Q8MSY4	VPS51_DROME	CG15087	Vacuolar protein sorting-associated protein 51 homolog	775444	721133	752513	708364	762819	713675
sp|Q8MT06|GNL3_DROME	Q8MT06	GNL3_DROME	Ns1	Guanine nucleotide-binding protein-like 3 homolog	638497	780363	728421	750797	681548	837366
sp|Q8MT36|MES4_DROME	Q8MT36	MES4_DROME	Mes-4	Probable histone-lysine N-methyltransferase Mes-4	751996	699887	650522	731926	849327	737688
sp|Q8MT80|PIGZ_DROME	Q8MT80	PIGZ_DROME	CG45068	GPI mannosyltransferase 4	696894	747346	812401	687231	916592	581228
sp|Q8MV48|GALT7_DROME	Q8MV48	GALT7_DROME	GalNAc-T2	N-acetylgalactosaminyltransferase 7	523487	1.03696e+06	602377	617215	900171	737197
sp|Q8MVS5|GLT35_DROME	Q8MVS5	GLT35_DROME	Pgant35A	Polypeptide N-acetylgalactosaminyltransferase 35A	732128	863697	569136	678974	747757	826131
sp|Q8MZC4|CRLS1_DROME	Q8MZC4	CRLS1_DROME	CLS	Probable cardiolipin synthase	1.05108e+06	564886	984483	584468	788390	499252
sp|Q8ST83|PHO_DROME	Q8ST83	PHO_DROME	pho	Polycomb protein PHO	571441	443754	714840	732672	1.18116e+06	736984
sp|Q8SWR2|BICRD_DROME	Q8SWR2	BICRD_DROME	CG17365	Bicaudal D-related protein homolog	680239	778588	701707	741028	718293	801428
sp|Q8SWR8|ATX2_DROME	Q8SWR8	ATX2_DROME	Atx2	Ataxin-2 homolog	812753	587209	992420	468340	916377	650366
sp|Q8SWV6|FICD_DROME	Q8SWV6	FICD_DROME	Fic	Adenosine monophosphate-protein transferase FICD homolog	565507	893946	549355	938792	616702	857032
sp|Q8SX68|Y0915_DROME	Q8SX68	Y0915_DROME	CG10915	Uncharacterized protein CG10915	800075	548547	807932	619657	978023	665327
sp|Q8SX86|NUTC_DROME	Q8SX86	NUTC_DROME	ntc	Protein nutcracker	815391	559230	907950	626935	958649	570297
sp|Q8SXY6|TMEDA_DROME	Q8SXY6	TMEDA_DROME	bai	Transmembrane emp24 domain-containing protein bai	819389	742180	666894	643505	806789	747069
sp|Q8SY33|GAWKY_DROME	Q8SY33	GAWKY_DROME	gw	Protein Gawky	727541	640608	742758	676976	918570	710844
sp|Q8SY61|OB56D_DROME	Q8SY61	OB56D_DROME	Obp56d	General odorant-binding protein 56d	398516	346149	930180	888727	722119	1.07001e+06
sp|Q8SY96|NFU1_DROME	Q8SY96	NFU1_DROME	CG32500	NFU1 iron-sulfur cluster scaffold homolog, mitochondrial	929163	807738	765448	728041	573576	662298
sp|Q8SYD0|TTC19_DROME	Q8SYD0	TTC19_DROME	Ttc19	Tetratricopeptide repeat protein 19 homolog, mitochondrial	736392	890855	822729	672759	622995	704491
sp|Q8SYG2|CSN3_DROME	Q8SYG2	CSN3_DROME	CSN3	COP9 signalosome complex subunit 3	752542	731382	800666	727613	711629	714094
sp|Q8SYS7|NARF_DROME	Q8SYS7	NARF_DROME	CG17683	Probable cytosolic Fe-S cluster assembly factor CG17683	858799	668498	849215	716493	708147	649864
sp|Q8SZ63|GOGA5_DROME	Q8SZ63	GOGA5_DROME	Golgin84	Golgin-84	877351	665226	767390	751684	759666	629632
sp|Q8T045|RUMI_DROME	Q8T045	RUMI_DROME	rumi	O-glucosyltransferase rumi	671742	730961	674042	809028	869984	673762
sp|Q8T079|GLYR1_DROME	Q8T079	GLYR1_DROME	CG4747	Putative oxidoreductase GLYR1 homolog	651681	818799	651591	691927	907900	700383
sp|Q8T088|WDR55_DROME	Q8T088	WDR55_DROME	CG14722	WD repeat-containing protein 55 homolog	816684	777720	779991	641936	788209	641846
sp|Q8T0R7|IDGF5_DROME	Q8T0R7	IDGF5_DROME	Idgf5	Chitinase-like protein Idgf5	648418	622244	698074	947278	1.08665e+06	445500
sp|Q8T0S6|HIPPO_DROME	Q8T0S6	HIPPO_DROME	hpo	Serine/threonine-protein kinase hippo	703622	753206	735818	789331	662267	785141
sp|Q8T3L6|FABD_DROME	Q8T3L6	FABD_DROME	beg	Probable malonyl-CoA-acyl carrier protein transacylase, mitochondrial	893064	730519	661154	859480	514187	789037
sp|Q8T3U2|RS23_DROME	Q8T3U2	RS23_DROME	RpS23	40S ribosomal protein S23	1.02971e+06	595558	827343	658553	702076	642656
sp|Q8T4E1|GPI8_DROME	Q8T4E1	GPI8_DROME	CG4406	Putative GPI-anchor transamidase	700301	760303	653648	847568	738188	732580
sp|Q8T4F7|ENA_DROME	Q8T4F7	ENA_DROME	ena	Protein enabled	428975	975194	415057	911830	819632	851750
sp|Q8T626|DLT_DROME	Q8T626	DLT_DROME	dlt	Protein disks lost	741071	696389	813802	671404	886192	627419
sp|Q8T6B9|PUF68_DROME	Q8T6B9	PUF68_DROME	pUf68	Poly(U)-binding-splicing factor half pint	623229	751718	665649	766965	846123	761345
sp|Q8T8L8|ALG10_DROME	Q8T8L8	ALG10_DROME	Alg10	Putative Dol-P-Glc:Glc(2)Man(9)GlcNAc(2)-PP-Dol alpha-1,2-glucosyltransferase	650996	784479	732621	770545	773314	718445
sp|Q8T8R1|Y3800_DROME	Q8T8R1	Y3800_DROME	CG3800	CCHC-type zinc finger protein CG3800	783408	206520	1.15063e+06	462235	879539	895212
sp|Q8T9B6|MESD_DROME	Q8T9B6	MESD_DROME	boca	LDLR chaperone boca	1.05925e+06	514389	841762	677083	819783	548840
sp|Q8WSF3|FDL_DROME	Q8WSF3	FDL_DROME	fdl	Probable beta-hexosaminidase fdl	634654	844032	665553	780911	619443	873262
sp|Q8WTC1|RT15_DROME	Q8WTC1	RT15_DROME	bonsai	28S ribosomal protein S15, mitochondrial	772540	821751	707352	859048	512300	775424
sp|Q94514|COX5A_DROME	Q94514	COX5A_DROME	CoVa	Cytochrome c oxidase subunit 5A, mitochondrial	1.01408e+06	609608	788663	744350	602344	696630
sp|Q94516|AT5F1_DROME	Q94516	AT5F1_DROME	ATPsyn-b	ATP synthase subunit b, mitochondrial	1.01015e+06	678410	797630	708415	615138	653599
sp|Q94517|HDAC1_DROME	Q94517	HDAC1_DROME	Rpd3	Histone deacetylase Rpd3	492677	778304	719641	716333	953599	744310
sp|Q94518|NACA_DROME	Q94518	NACA_DROME	Nacalpha	Nascent polypeptide-associated complex subunit alpha	821642	671890	860864	669902	703341	711609
sp|Q94521|DNAT_DROME	Q94521	DNAT_DROME	Dat	Dopamine N-acetyltransferase	928533	594434	608942	604892	796486	871335
sp|Q94523|SDHA_DROME	Q94523	SDHA_DROME	SdhA	Succinate dehydrogenase [ubiquinone] flavoprotein subunit, mitochondrial	804375	949909	557121	803346	476152	851314
sp|Q94524|DYLT_DROME	Q94524	DYLT_DROME	Dlc90F	Dynein light chain Tctex-type	677013	794462	665565	768922	742066	776145
sp|Q94526|ORK1_DROME	Q94526	ORK1_DROME	Ork1	Open rectifier potassium channel protein 1	656930	648418	930983	636504	726621	813945
sp|Q94527|NFKB1_DROME	Q94527	NFKB1_DROME	Rel	Nuclear factor NF-kappa-B p110 subunit	859535	639678	743705	722553	694490	770691
sp|Q94529|GS1_DROME	Q94529	GS1_DROME	Gs1l	Probable pseudouridine-5'-monophosphatase	883779	613857	906476	689183	636703	715010
sp|Q94547|RGA_DROME	Q94547	RGA_DROME	Rga	Regulator of gene activity	781958	596872	851870	663200	907635	630986
sp|Q94901|LARK_DROME	Q94901	LARK_DROME	lark	RNA-binding protein lark	753169	714553	740403	744142	830609	654882
sp|Q94913|REG5_DROME	Q94913	REG5_DROME	Reg-5	Rhythmically expressed gene 5 protein	872639	488443	694260	480335	1.39008e+06	488793
sp|Q94915|REG2_DROME	Q94915	REG2_DROME	Reg-2	Rhythmically expressed gene 2 protein	1.00656e+06	321151	1.27315e+06	682658	854017	348615
sp|Q95029|CATL_DROME	Q95029	CATL_DROME	Cp1	Cathepsin L	563052	883680	694911	819027	691733	775270
sp|Q95083|PSA5_DROME	Q95083	PSA5_DROME	Prosalpha5	Proteasome subunit alpha type-5	818451	680648	801943	670185	802925	664825
sp|Q95NH6|ATTC_DROME	Q95NH6	ATTC_DROME	AttC	Attacin-C	1.44149e+06	589623	535575	439739	777552	671666
sp|Q95R48|OCTL_DROME	Q95R48	OCTL_DROME	Orct2	Organic cation transporter-like protein	728279	607150	976221	545037	872984	692651
sp|Q95RA8|MOB1_DROME	Q95RA8	MOB1_DROME	mats	MOB kinase activator-like 1	898010	600621	864450	584414	901853	593311
sp|Q95RJ9|EBI_DROME	Q95RJ9	EBI_DROME	ebi	F-box-like/WD repeat-containing protein ebi	745988	747296	706503	645802	884468	695800
sp|Q95RN0|U528_DROME	Q95RN0	U528_DROME	CG10038	UPF0528 protein CG10038	723402	802598	811193	776262	649831	686058
sp|Q95RU0|CUE_DROME	Q95RU0	CUE_DROME	cue	Protein cueball	1.11071e+06	576253	609918	790659	750359	620909
sp|Q95SK3|CK5P3_DROME	Q95SK3	CK5P3_DROME	CG30291	CDK5RAP3-like protein	929080	710676	748934	739162	654936	672409
sp|Q95SP2|HRD1_DROME	Q95SP2	HRD1_DROME	sip3	E3 ubiquitin-protein ligase HRD1	885439	665633	815623	672340	806408	605305
sp|Q95SS8|TMM70_DROME	Q95SS8	TMM70_DROME	CG7506	Transmembrane protein 70 homolog, mitochondrial	1.0031e+06	678740	815730	711916	608171	647198
sp|Q95SX8|NAA60_DROME	Q95SX8	NAA60_DROME	Naa60	N-alpha-acetyltransferase 60	598277	819422	669339	778951	749115	802172
sp|Q95T12|FLOWR_DROME	Q95T12	FLOWR_DROME	fwe	Calcium channel flower	692892	753183	840995	716601	850115	591985
sp|Q95TN1|TPC13_DROME	Q95TN1	TPC13_DROME	CG4953	Probable trafficking protein particle complex subunit 13 homolog	737676	728692	746378	677503	794620	740456
sp|Q95TN4|COG4_DROME	Q95TN4	COG4_DROME	CG7456	Conserved oligomeric Golgi complex subunit 4	788355	798386	702123	690420	693694	760933
sp|Q95V55|FOXO_DROME	Q95V55	FOXO_DROME	foxo	Forkhead box protein O	775981	502480	871433	568334	1.05718e+06	639474
sp|Q960E8|TF2H1_DROME	Q960E8	TF2H1_DROME	Tfb1	General transcription factor IIH subunit 1	684551	771316	767005	702929	790741	713394
sp|Q960T2-5|SAP47_DROME	Q960T2-5	SAP47_DROME	Sap47	Isoform G of Synapse-associated protein of 47 kDa	721424	677245	702497	668558	904453	739963
sp|Q960W6|FACR3_DROME	Q960W6	FACR3_DROME	CG8306	Putative fatty acyl-CoA reductase CG8306	454370	936899	499590	805842	822787	877189
sp|Q960X8|HRS_DROME	Q960X8	HRS_DROME	Hrs	Hepatocyte growth factor-regulated tyrosine kinase substrate	861806	620700	803902	656881	823279	669593
sp|Q961D9|BCL9_DROME	Q961D9	BCL9_DROME	lgs	Protein BCL9 homolog	607596	544253	734154	670304	1.00811e+06	820012
sp|Q961G1|COG3_DROME	Q961G1	COG3_DROME	Cog3	Conserved oligomeric Golgi complex subunit 3	781934	765784	734875	705401	703132	743995
sp|Q99323|MYSN_DROME	Q99323	MYSN_DROME	zip	Myosin heavy chain, non-muscle	631144	475957	1.19436e+06	551506	1.00979e+06	563742
sp|Q9GPJ1|SKEL2_DROME	Q9GPJ1	SKEL2_DROME	Skeletor	Protein Skeletor, isoforms D/E	645831	842341	637913	906738	622787	779560
sp|Q9GQN5|ATRX_DROME	Q9GQN5	ATRX_DROME	XNP	Transcriptional regulator ATRX homolog	563176	797483	649782	742922	992169	671598
sp|Q9GU68|IF5A_DROME	Q9GU68	IF5A_DROME	eIF-5A	Eukaryotic translation initiation factor 5A	1.01973e+06	680660	834279	516939	720399	677016
sp|Q9GYU8|NUP88_DROME	Q9GYU8	NUP88_DROME	mbo	Nuclear pore complex protein Nup88	664148	779547	754300	750242	783043	701359
sp|Q9GYV5|NEMO_DROME	Q9GYV5	NEMO_DROME	key	NF-kappa-B essential modulator	766874	666274	709325	825685	686394	774705
sp|Q9I7D3|CAPR1_DROME	Q9I7D3	CAPR1_DROME	Capr	Caprin homolog	696091	681609	830657	684419	798191	732876
sp|Q9I7F7|PR2_DROME	Q9I7F7	PR2_DROME	PR2	Tyrosine-protein kinase PR2	566770	702660	651860	751669	893795	829277
sp|Q9I7I7|SIRT2_DROME	Q9I7I7	SIRT2_DROME	Sirt2	NAD-dependent protein deacetylase Sirt2	935731	527934	1.0316e+06	616968	828787	520122
sp|Q9I7K0|JUPIT_DROME	Q9I7K0	JUPIT_DROME	Jupiter	Microtubule-associated protein Jupiter	477640	270016	806013	263139	1.74184e+06	759076
sp|Q9I7K6|NASP_DROME	Q9I7K6	NASP_DROME	CG8223	Protein NASP homolog	579679	895564	511877	818768	768416	837021
sp|Q9I7M2|GTPBA_DROME	Q9I7M2	GTPBA_DROME	CG10628	GTP-binding protein 10 homolog	612867	874732	604572	942846	515245	877274
sp|Q9I7T7|Y1505_DROME	Q9I7T7	Y1505_DROME	CG11505	La-related protein CG11505	726553	577538	889167	665698	813719	745763
sp|Q9I7W5|SAS10_DROME	Q9I7W5	SAS10_DROME	Sas10	Something about silencing protein 10	722602	793302	637442	814697	616784	840700
sp|Q9N2M8|HDC_DROME	Q9N2M8	HDC_DROME	hdc	Headcase protein	1.01951e+06	615940	472660	571759	1.04922e+06	688744
sp|Q9NBD7|CLASP_DROME	Q9NBD7	CLASP_DROME	chb	CLIP-associating protein	698862	734131	766902	764208	771202	698848
sp|Q9NFP1|VNNL1_DROME	Q9NFP1	VNNL1_DROME	CG32754	Vanin-like protein 1	300548	1.55126e+06	87835.2	1.1248e+06	52176.6	1.28828e+06
sp|Q9NFU0|FMR1_DROME	Q9NFU0	FMR1_DROME	Fmr1	Fragile X mental retardation syndrome-related protein 1	602870	827268	868274	694296	814336	633426
sp|Q9NG98|TOP3A_DROME	Q9NG98	TOP3A_DROME	Top3alpha	DNA topoisomerase 3-alpha	340865	1.10584e+06	409485	1.08044e+06	424606	1.04368e+06
sp|Q9NGC3|CEG1A_DROME	Q9NGC3	CEG1A_DROME	CenG1A	Centaurin-gamma-1A	701203	333659	849975	512239	1.26816e+06	711941
sp|Q9NGX9|CP302_DROME	Q9NGX9	CP302_DROME	dib	Cytochrome P450 302a1, mitochondrial	1.03235e+06	901474	436218	361329	1.23616e+06	476885
sp|Q9NHA8|BGBP3_DROME	Q9NHA8	BGBP3_DROME	GNBP3	Gram-negative bacteria-binding protein 3	918225	658471	441376	804087	1.27328e+06	359973
sp|Q9NHB0|BGBP1_DROME	Q9NHB0	BGBP1_DROME	GNBP1	Gram-negative bacteria-binding protein 1	787497	664759	778618	654385	780103	757937
sp|Q9NHD5|SAN_DROME	Q9NHD5	SAN_DROME	san	Probable N-acetyltransferase san	796132	783535	714526	775095	579223	790624
sp|Q9NHE5|CAPS_DROME	Q9NHE5	CAPS_DROME	Caps	Calcium-dependent secretion activator	573253	456899	734751	493873	1.44773e+06	662771
sp|Q9NI63|PMYT1_DROME	Q9NI63	PMYT1_DROME	Myt1	Membrane-associated tyrosine- and threonine-specific cdc2-inhibitory kinase	755716	927643	678202	585668	582894	891947
sp|Q9NIV1|E2AK3_DROME	Q9NIV1	E2AK3_DROME	PEK	Eukaryotic translation initiation factor 2-alpha kinase	693101	810035	593239	870566	610937	847024
sp|Q9NJG9|SUZ12_DROME	Q9NJG9	SUZ12_DROME	Su(z)12	Polycomb protein Su(z)12	539915	820941	617549	811901	790308	827273
sp|Q9NJH0|EF1G_DROME	Q9NJH0	EF1G_DROME	Ef1gamma	Elongation factor 1-gamma	997641	735946	738768	755577	556337	680859
sp|Q9NK57|GTPC1_DROME	Q9NK57	GTPC1_DROME	anon-35F/36A	Putative GTP cyclohydrolase 1 type 2	826797	729209	761310	706513	746719	673542
sp|Q9TVM2|XPO1_DROME	Q9TVM2	XPO1_DROME	emb	Exportin-1	705644	718582	817015	712932	823189	658673
sp|Q9TVP3-2|JDP_DROME	Q9TVP3-2	JDP_DROME	jdp	Isoform A of J domain-containing protein	781364	208278	1.48978e+06	395239	902959	641187
sp|Q9TVQ5|SPT4H_DROME	Q9TVQ5	SPT4H_DROME	spt4	Transcription elongation factor SPT4	80165.1	1.24062e+06	77168.7	1.32488e+06	61846.7	1.55928e+06
sp|Q9U1H8|FACE2_DROME	Q9U1H8	FACE2_DROME	Sras	CAAX prenyl protease 2	670212	1.16963e+06	477502	200787	659776	1.1868e+06
sp|Q9U1H9|NXF1_DROME	Q9U1H9	NXF1_DROME	sbr	Nuclear RNA export factor 1	692725	775971	817733	676727	767095	703550
sp|Q9U3V9|XMAS2_DROME	Q9U3V9	XMAS2_DROME	xmas-2	Protein xmas-2	683262	795753	604647	817237	771952	753371
sp|Q9U3W6|MAB21_DROME	Q9U3W6	MAB21_DROME	mab-21	Protein mab-21	525165	580213	716330	641366	1.25191e+06	672237
sp|Q9U405|GRAU_DROME	Q9U405	GRAU_DROME	grau	Transcription factor grauzone	651790	714157	864992	655462	922664	622416
sp|Q9U4F3|SURF1_DROME	Q9U4F3	SURF1_DROME	Surf1	SURF1-like protein	838085	774935	617190	805059	621929	781305
sp|Q9U5L1|SRPR_DROME	Q9U5L1	SRPR_DROME	Gtp-bp	Signal recognition particle receptor subunit alpha homolog	1.08705e+06	635245	738375	666239	697013	636413
sp|Q9U5W9|TAF10_DROME	Q9U5W9	TAF10_DROME	Taf10	Transcription initiation factor TFIID subunit 10	747290	516531	754439	782093	879573	734903
sp|Q9U6M0|ECSIT_DROME	Q9U6M0	ECSIT_DROME	ECSIT	Evolutionarily conserved signaling intermediate in Toll pathway, mitochondrial	947856	894451	641459	478359	606677	860979
sp|Q9U6Y9-2|ANM5_DROME	Q9U6Y9-2	ANM5_DROME	csul	Isoform 2 of Protein arginine N-methyltransferase 5	577898	997492	628237	861446	537965	831743
sp|Q9U915|KAD2_DROME	Q9U915	KAD2_DROME	Adk2	Adenylate kinase	1.02002e+06	506186	1.04989e+06	653684	625934	609704
sp|Q9U9P7|PITC1_DROME	Q9U9P7	PITC1_DROME	rdgBbeta	Cytoplasmic phosphatidylinositol transfer protein 1	807609	697623	930500	635869	768249	611135
sp|Q9U9Q4|EIF3H_DROME	Q9U9Q4	EIF3H_DROME	eIF-3p40	Eukaryotic translation initiation factor 3 subunit H	898742	670232	838542	688527	700660	655127
sp|Q9V359|VPS28_DROME	Q9V359	VPS28_DROME	Vps28	Vacuolar protein sorting-associated protein 28 homolog	767565	614732	802868	703463	735752	794827
sp|Q9V3A6|ERO1L_DROME	Q9V3A6	ERO1L_DROME	Ero1L	Ero1-like protein	819594	607549	875796	648344	857841	629284
sp|Q9V3B4|FADD_DROME	Q9V3B4	FADD_DROME	Fadd	Fas-associated death domain protein	830785	545081	847898	710193	798096	698742
sp|Q9V3B6|CWC15_DROME	Q9V3B6	CWC15_DROME	c12.1	Protein CWC15 homolog	723442	496530	781198	644021	1.09515e+06	665620
sp|Q9V3C0|DDX41_DROME	Q9V3C0	DDX41_DROME	abs	ATP-dependent RNA helicase abstrakt	727550	758364	671500	753870	776530	740200
sp|Q9V3C5|RIC1_DROME	Q9V3C5	RIC1_DROME	Rich	Protein RIC1 homolog	780830	705823	710679	710628	732739	783543
sp|Q9V3D2|HEM6_DROME	Q9V3D2	HEM6_DROME	Coprox	Coproporphyrinogen-III oxidase	749738	831802	543770	939897	553177	819223
sp|Q9V3D4|IDGF2_DROME	Q9V3D4	IDGF2_DROME	Idgf2	Chitinase-like protein Idgf2	576133	780566	723155	881628	1.06637e+06	426490
sp|Q9V3D6|CPSF2_DROME	Q9V3D6	CPSF2_DROME	Cpsf100	Probable cleavage and polyadenylation specificity factor subunit 2	675753	773441	659024	765541	811687	738666
sp|Q9V3G1|RL8_DROME	Q9V3G1	RL8_DROME	RpL8	60S ribosomal protein L8	976505	662781	819277	662350	719447	618311
sp|Q9V3G3|PPIE_DROME	Q9V3G3	PPIE_DROME	cyp33	Peptidyl-prolyl cis-trans isomerase E	755790	735936	731430	643188	814479	742864
sp|Q9V3G6|CNO10_DROME	Q9V3G6	CNO10_DROME	CG18616	CCR4-NOT transcription complex subunit 10 homolog	891497	615166	929441	645515	767217	604115
sp|Q9V3G7|PSMD6_DROME	Q9V3G7	PSMD6_DROME	Rpn7	26S proteasome non-ATPase regulatory subunit 6	767939	654066	975690	669082	751295	629142
sp|Q9V3H2|PSDE_DROME	Q9V3H2	PSDE_DROME	Rpn11	26S proteasome non-ATPase regulatory subunit 14	795040	734868	803769	705475	714723	689326
sp|Q9V3H8|NXT1_DROME	Q9V3H8	NXT1_DROME	Nxt1	NTF2-related export protein	673675	741737	751597	775975	730432	754145
sp|Q9V3J1-2|VATH_DROME	Q9V3J1-2	VATH_DROME	VhaSFD	Isoform B of V-type proton ATPase subunit H	628774	945741	447147	948681	486335	961212
sp|Q9V3L6|NCBP2_DROME	Q9V3L6	NCBP2_DROME	Cbp20	Nuclear cap-binding protein subunit 2	769327	760594	828044	698217	766359	626828
sp|Q9V3P0|PRDX1_DROME	Q9V3P0	PRDX1_DROME	Jafrac1	Peroxiredoxin 1	627426	800846	843149	749688	525186	877270
sp|Q9V3P6|PSMD1_DROME	Q9V3P6	PSMD1_DROME	Rpn2	26S proteasome non-ATPase regulatory subunit 1	812293	749925	784574	700472	710405	687170
sp|Q9V3Q6|M3K7_DROME	Q9V3Q6	M3K7_DROME	Tak1	Mitogen-activated protein kinase kinase kinase 7	836726	723616	741134	677404	727885	729231
sp|Q9V3S0|CP4G1_DROME	Q9V3S0	CP4G1_DROME	Cyp4g1	Cytochrome P450 4g1	176914	1.44579e+06	214540	1.85036e+06	223523	598047
sp|Q9V3S9|BGM_DROME	Q9V3S9	BGM_DROME	bgm	Very long-chain-fatty-acid--CoA ligase bubblegum	1.11086e+06	624396	864448	726268	485362	663369
sp|Q9V3T9|ADRO_DROME	Q9V3T9	ADRO_DROME	dare	NADPH:adrenodoxin oxidoreductase, mitochondrial	898424	593453	906016	664255	768118	619739
sp|Q9V3U0|BGML_DROME	Q9V3U0	BGML_DROME	CG4500	Long-chain-fatty-acid--CoA ligase bubblegum-like	665012	510965	1.25852e+06	639338	879961	497885
sp|Q9V3W6|INX7_DROME	Q9V3W6	INX7_DROME	Inx7	Innexin inx7	449937	895357	453326	976956	529332	1.08172e+06
sp|Q9V3X4|BSCL2_DROME	Q9V3X4	BSCL2_DROME	Seipin	Seipin	630429	818237	650529	898587	487342	933758
sp|Q9V3Y2|DRE2_DROME	Q9V3Y2	DRE2_DROME	CIAPIN1	Anamorsin homolog	685470	605953	836802	717075	743815	821970
sp|Q9V3Y3|DFP_DROME	Q9V3Y3	DFP_DROME	l(2)34Fc	Defense protein l(2)34Fc	320785	699727	636819	905210	615983	1.17484e+06
sp|Q9V3Z6|MYO7A_DROME	Q9V3Z6	MYO7A_DROME	ck	Myosin-VIIa	691327	721149	748065	809706	726471	734848
sp|Q9V411|NOG1_DROME	Q9V411	NOG1_DROME	CG8801	Probable nucleolar GTP-binding protein 1	598564	814936	771327	773502	670261	796262
sp|Q9V419|C28A5_DROME	Q9V419	C28A5_DROME	Cyp28a5	Probable cytochrome P450 28a5	874252	808934	661906	776732	496624	824967
sp|Q9V429-2|THIO2_DROME	Q9V429-2	THIO2_DROME	Trx-2	Isoform Short of Thioredoxin-2	826712	617261	1.07604e+06	577021	766719	589185
sp|Q9V431|API5_DROME	Q9V431	API5_DROME	Aac11	Apoptosis inhibitor 5 homolog	672894	663337	875261	641799	962642	613021
sp|Q9V439|MED22_DROME	Q9V439	MED22_DROME	MED22	Mediator of RNA polymerase II transcription subunit 22	724535	627531	678575	822769	754718	807303
sp|Q9V447|KRH2_DROME	Q9V447	KRH2_DROME	Kr-h2	Krueppel homolog 2	761697	771782	658633	814999	651289	776061
sp|Q9V460|SPT5H_DROME	Q9V460	SPT5H_DROME	Spt5	Transcription elongation factor SPT5	715331	785700	701537	686640	731541	800417
sp|Q9V461|MCM6_DROME	Q9V461	MCM6_DROME	Mcm6	DNA replication licensing factor Mcm6	407109	885109	624115	765561	936657	781719
sp|Q9V468|Y9776_DROME	Q9V468	Y9776_DROME	CG9776	Zinc finger matrin-type protein CG9776	683486	637013	705351	700436	871662	805663
sp|Q9V4C8|HCF_DROME	Q9V4C8	HCF_DROME	Hcf	Host cell factor	712984	462439	956910	482346	1.20107e+06	591381
sp|Q9V4F9|MED26_DROME	Q9V4F9	MED26_DROME	MED26	Mediator of RNA polymerase II transcription subunit 26	736913	482502	839967	588444	970730	778145
sp|Q9V4I0|CP9B1_DROME	Q9V4I0	CP9B1_DROME	Cyp9b1	Cytochrome P450 9b1	1.04863e+06	706107	820635	489383	655718	726805
sp|Q9V4I1|CP9B2_DROME	Q9V4I1	CP9B2_DROME	Cyp9b2	Cytochrome P450 9b2	827603	836608	442715	981821	398240	945071
sp|Q9V4P1|ANLN_DROME	Q9V4P1	ANLN_DROME	scra	Actin-binding protein anillin	457187	737960	569402	644757	1.12226e+06	839673
sp|Q9V4Q8|RU2A_DROME	Q9V4Q8	RU2A_DROME	U2A	Probable U2 small nuclear ribonucleoprotein A'	734260	593004	796402	634266	854479	794510
sp|Q9V4S8|CSN7_DROME	Q9V4S8	CSN7_DROME	CSN7	COP9 signalosome complex subunit 7	927453	675562	920743	531159	820458	579074
sp|Q9V4T3|C4AD1_DROME	Q9V4T3	C4AD1_DROME	Cyp4ad1	Probable cytochrome P450 4ad1	719982	920673	383112	1.05642e+06	393472	956231
sp|Q9V4T5|CP4E1_DROME	Q9V4T5	CP4E1_DROME	Cyp4e1	Probable cytochrome P450 4e1	858088	655010	831025	678442	790887	632774
sp|Q9V4U7|C6A14_DROME	Q9V4U7	C6A14_DROME	Cyp6a14	Probable cytochrome P450 6a14	1.5987e+06	69755.2	1.05386e+06	86732.8	1.56052e+06	105768
sp|Q9V4U9|C6A13_DROME	Q9V4U9	C6A13_DROME	Cyp6a13	Probable cytochrome P450 6a13	614386	847621	573170	917369	588276	879283
sp|Q9V4W1|GLE1_DROME	Q9V4W1	GLE1_DROME	GLE1	Nucleoporin GLE1	674196	703045	694266	753970	826279	764665
sp|Q9V521|PRPA3_DROME	Q9V521	PRPA3_DROME	proPo-A3	Phenoloxidase subunit A3	496972	588667	1.16463e+06	460471	1.11109e+06	589401
sp|Q9V535|RBM8A_DROME	Q9V535	RBM8A_DROME	tsu	RNA-binding protein 8A	846663	733437	847956	557573	794868	661088
sp|Q9V557|CP4P2_DROME	Q9V557	CP4P2_DROME	Cyp4p2	Probable cytochrome P450 4p2	770388	615018	907685	738977	653389	749069
sp|Q9V558|CP4P1_DROME	Q9V558	CP4P1_DROME	Cyp4p1	Cytochrome P450 4p1	786872	556098	1.08186e+06	646889	743659	630197
sp|Q9V559|CP4P3_DROME	Q9V559	CP4P3_DROME	Cyp4p3	Probable cytochrome P450 4p3	338649	1.14605e+06	378364	1.08771e+06	272707	1.17305e+06
sp|Q9V564|COG6_DROME	Q9V564	COG6_DROME	CG1968	Conserved oligomeric Golgi complex subunit 6	713614	789353	707633	762213	649314	805806
sp|Q9V576|WUN_DROME	Q9V576	WUN_DROME	wun	Putative phosphatidate phosphatase	794691	661912	736311	727357	791453	718259
sp|Q9V597|RL31_DROME	Q9V597	RL31_DROME	RpL31	60S ribosomal protein L31	939268	558641	763805	645215	681356	832600
sp|Q9V5C6|PSA3_DROME	Q9V5C6	PSA3_DROME	Prosalpha7	Proteasome subunit alpha type-3	807399	770753	834017	682343	815235	550065
sp|Q9V5P6|NOP10_DROME	Q9V5P6	NOP10_DROME	CG7637	H/ACA ribonucleoprotein complex subunit 3	822051	392467	923558	504222	997540	757784
sp|Q9V5Q4|SYF2_DROME	Q9V5Q4	SYF2_DROME	Syf2	Pre-mRNA-splicing factor Syf2	650263	642643	752425	666023	959099	736444
sp|Q9V5Z7|AQP_DROME	Q9V5Z7	AQP_DROME	Drip	Aquaporin	446356	1.04253e+06	358489	991913	700866	871903
sp|Q9V637|PSMF1_DROME	Q9V637	PSMF1_DROME	PI31	Proteasome inhibitor PI31 subunit	792311	651176	873538	595355	780509	733826
sp|Q9V668|S61G1_DROME	Q9V668	S61G1_DROME	SEC61G1	Protein transport protein Sec61 gamma-1 subunit	1.56659e+06	697367	1.15498e+06	498575	520164	139129
sp|Q9V674|CP6G1_DROME	Q9V674	CP6G1_DROME	Cyp6g1	Cytochrome P450 6g1	153199	1.02954e+06	244244	1.573e+06	152920	1.23791e+06
sp|Q9V675|CP6G2_DROME	Q9V675	CP6G2_DROME	Cyp6g2	Probable cytochrome P450 6g2	641589	1.51901e+06	441698	266651	1.17197e+06	421066
sp|Q9V677|ECM29_DROME	Q9V677	ECM29_DROME	CG8858	Proteasome-associated protein ECM29 homolog	677007	823853	720950	702979	716404	783987
sp|Q9V6B9|NUP54_DROME	Q9V6B9	NUP54_DROME	Nup54	Probable nucleoporin Nup54	689221	776452	667553	781576	732041	777919
sp|Q9V6G5|TAZ_DROME	Q9V6G5	TAZ_DROME	Taz	Tafazzin homolog	454256	1.04316e+06	442170	995783	427625	1.04306e+06
sp|Q9V6H1|CP9H1_DROME	Q9V6H1	CP9H1_DROME	Cyp9h1	Probable cytochrome P450 9h1	777690	798267	545860	1.06067e+06	456179	809900
sp|Q9V6K1|TPP2_DROME	Q9V6K1	TPP2_DROME	TppII	Tripeptidyl-peptidase 2	817937	739195	727870	707681	769720	678803
sp|Q9V6L9|FBSP1_DROME	Q9V6L9	FBSP1_DROME	Fsn	F-box/SPRY domain-containing protein 1	820595	661867	805101	683097	756005	708469
sp|Q9V6U8|UBA3_DROME	Q9V6U8	UBA3_DROME	Uba3	Nedd8-activating enzyme E1 catalytic subunit	791497	742505	800236	664871	763935	677702
sp|Q9V6U9|MECR_DROME	Q9V6U9	MECR_DROME	CG16935	Probable trans-2-enoyl-CoA reductase, mitochondrial	874506	659462	862991	769460	571458	714371
sp|Q9V6X7|OFUT1_DROME	Q9V6X7	OFUT1_DROME	O-fut1	GDP-fucose protein O-fucosyltransferase 1	338437	859024	458078	947461	999816	789458
sp|Q9V6Y3|RT16_DROME	Q9V6Y3	RT16_DROME	mRpS16	Probable 28S ribosomal protein S16, mitochondrial	762839	755489	723880	779122	590837	819278
sp|Q9V719|SIN1_DROME	Q9V719	SIN1_DROME	Sin1	Stress-activated map kinase-interacting protein 1	515973	653395	912208	704613	882854	740018
sp|Q9V726|CPSF1_DROME	Q9V726	CPSF1_DROME	Cpsf160	Cleavage and polyadenylation specificity factor subunit 1	641226	783879	692213	744717	858206	704744
sp|Q9V769|C6A22_DROME	Q9V769	C6A22_DROME	Cyp6a22	Cytochrome P450 6a22	1.09971e+06	521009	1.03102e+06	451738	835814	524203
sp|Q9V770|C6A17_DROME	Q9V770	C6A17_DROME	Cyp6a17	Probable cytochrome P450 6a17	919903	375809	1.35672e+06	371142	1.00969e+06	422724
sp|Q9V771|C6A23_DROME	Q9V771	C6A23_DROME	Cyp6a23	Probable cytochrome P450 6a23	169129	1.20798e+06	152339	1.26348e+06	186234	1.38568e+06
sp|Q9V773|C6A20_DROME	Q9V773	C6A20_DROME	Cyp6a20	Probable cytochrome P450 6a20	35748.8	1.42997e+06	53255.5	1.026e+06	62159.5	1.71136e+06
sp|Q9V774|C6A21_DROME	Q9V774	C6A21_DROME	Cyp6a21	Probable cytochrome P450 6a21	1.51443e+06	372891	539900	437231	1.132e+06	461996
sp|Q9V778|ADAS_DROME	Q9V778	ADAS_DROME	CG10253	Alkyldihydroxyacetonephosphate synthase	794585	609902	1.0572e+06	641318	934395	428382
sp|Q9V784|SAM50_DROME	Q9V784	SAM50_DROME	CG7639	SAM50-like protein CG7639	765085	809380	724794	773435	670206	703235
sp|Q9V785|3BP5H_DROME	Q9V785	3BP5H_DROME	pcs	SH3 domain-binding protein 5 homolog	757289	683559	1.04148e+06	631966	724078	613880
sp|Q9V7A4|ITA4_DROME	Q9V7A4	ITA4_DROME	ItgalphaPS4	Integrin alpha-PS4	183509	1.60183e+06	167612	1.98714e+06	219528	391061
sp|Q9V7D2|VATD1_DROME	Q9V7D2	VATD1_DROME	Vha36-1	V-type proton ATPase subunit D 1	690911	790169	535668	795578	647179	944282
sp|Q9V7H4|TM131_DROME	Q9V7H4	TM131_DROME	CG8370	Transmembrane protein 131 homolog	827433	646564	753338	760584	776344	675362
sp|Q9V7N5-2|VATC_DROME	Q9V7N5-2	VATC_DROME	Vha44	Isoform A of V-type proton ATPase subunit C	649803	912900	469894	902395	501696	976656
sp|Q9V7P1|UTP18_DROME	Q9V7P1	UTP18_DROME	wcd	U3 small nucleolar RNA-associated protein 18 homolog	622197	819490	696469	658597	643679	958532
sp|Q9V7S5|PICO_DROME	Q9V7S5	PICO_DROME	Picot	Putative inorganic phosphate cotransporter	536728	996375	460396	1.04277e+06	609703	790131
sp|Q9V7Y2|SGPL_DROME	Q9V7Y2	SGPL_DROME	Sply	Sphingosine-1-phosphate lyase	926554	774908	570966	906032	449715	821734
sp|Q9V813|MTAP_DROME	Q9V813	MTAP_DROME	Mtap	S-methyl-5'-thioadenosine phosphorylase	941325	649987	906894	602302	607959	737177
sp|Q9V818|MTH3_DROME	Q9V818	MTH3_DROME	mthl3	Probable G-protein coupled receptor Mth-like 3	651800	772939	916201	703123	782977	618867
sp|Q9V831|APC10_DROME	Q9V831	APC10_DROME	APC10	Anaphase-promoting complex subunit 10	712112	782740	783648	572016	759404	806617
sp|Q9V853|SMUF1_DROME	Q9V853	SMUF1_DROME	lack	E3 ubiquitin-protein ligase Smurf1	720427	697162	723293	783797	807546	698766
sp|Q9V877|SUB_DROME	Q9V877	SUB_DROME	sub	Kinesin-like protein subito	405974	1.05664e+06	538180	247228	843389	1.23785e+06
sp|Q9V8I2|LTOR2_DROME	Q9V8I2	LTOR2_DROME	CG5189	Ragulator complex protein LAMTOR2 homolog	768338	640252	849254	750652	798801	635201
sp|Q9V8K2|EXOC3_DROME	Q9V8K2	EXOC3_DROME	sec6	Exocyst complex component 3	727036	766525	739003	658170	772365	761027
sp|Q9V8M2|C12B2_DROME	Q9V8M2	C12B2_DROME	Cyp12b2	Probable cytochrome P450 12b2, mitochondrial	510784	719650	1.23839e+06	652593	617653	700463
sp|Q9V8M5|3HIDH_DROME	Q9V8M5	3HIDH_DROME	CG15093	Probable 3-hydroxyisobutyrate dehydrogenase, mitochondrial	1.00296e+06	790958	389984	1.04289e+06	416464	814757
sp|Q9V8R9|41_DROME	Q9V8R9	41_DROME	cora	Protein 4.1 homolog	652144	741380	841768	687913	841099	667353
sp|Q9V8W3|RABEP_DROME	Q9V8W3	RABEP_DROME	Rep	Rab proteins geranylgeranyltransferase component A	586872	1.02906e+06	581653	859387	530307	846655
sp|Q9V8Y2|OB56A_DROME	Q9V8Y2	OB56A_DROME	Obp56a	General odorant-binding protein 56a	385992	362023	809112	807982	755784	1.2075e+06
sp|Q9V968|U195B_DROME	Q9V968	U195B_DROME	CG30152	MIP18 family protein CG30152	1.10228e+06	585031	570443	622572	871827	683921
sp|Q9V979|CP6U1_DROME	Q9V979	CP6U1_DROME	Cyp6u1	Probable cytochrome P450 6u1	760345	734944	630568	886582	663395	760005
sp|Q9V998|UBL5_DROME	Q9V998	UBL5_DROME	ubl	Ubiquitin-like protein 5	1.10824e+06	489289	995981	512518	879268	481813
sp|Q9V9A7|MCCB_DROME	Q9V9A7	MCCB_DROME	l(2)04524	Probable methylcrotonoyl-CoA carboxylase beta chain, mitochondrial	961983	736699	673439	834959	565892	689430
sp|Q9V9E3|PREP_DROME	Q9V9E3	PREP_DROME	CG3107	Presequence protease, mitochondrial	696982	700416	677053	985366	606846	770172
sp|Q9V9J3|SRC42_DROME	Q9V9J3	SRC42_DROME	Src42A	Tyrosine-protein kinase Src42A	589317	815882	638951	773034	800677	795712
sp|Q9V9K7|SRRT_DROME	Q9V9K7	SRRT_DROME	Ars2	Serrate RNA effector molecule homolog	723423	747294	828814	683086	781514	673874
sp|Q9V9L1|CP6W1_DROME	Q9V9L1	CP6W1_DROME	Cyp6w1	Probable cytochrome P450 6w1	758263	582927	1.11782e+06	562036	656703	753037
sp|Q9V9S8|HEMH_DROME	Q9V9S8	HEMH_DROME	FeCh	Ferrochelatase, mitochondrial	717698	780407	799786	794098	620690	730818
sp|Q9V9U4|DOHH_DROME	Q9V9U4	DOHH_DROME	nero	Deoxyhypusine hydroxylase	787192	713219	756192	649525	671069	842049
sp|Q9V9V9|NAT9_DROME	Q9V9V9	NAT9_DROME	CG11539	N-acetyltransferase 9-like protein	1.0646e+06	573546	906161	572038	736964	605785
sp|Q9V9W8|PYGO_DROME	Q9V9W8	PYGO_DROME	pygo	Protein pygopus	746860	694627	653493	652491	1.03093e+06	642869
sp|Q9V9X4|MTNA_DROME	Q9V9X4	MTNA_DROME	CG11334	Methylthioribose-1-phosphate isomerase	680279	811123	636263	803283	439420	1.03559e+06
sp|Q9V9Z1|RM32_DROME	Q9V9Z1	RM32_DROME	mRpL32	39S ribosomal protein L32, mitochondrial	845742	756352	903406	677551	701263	580723
sp|Q9V9Z9|EBP2_DROME	Q9V9Z9	EBP2_DROME	CG1542	Probable rRNA-processing protein EBP2 homolog	653020	870409	702978	716199	663705	818019
sp|Q9VA00|ZWILC_DROME	Q9VA00	ZWILC_DROME	zwilch	Protein zwilch	528443	865518	491553	883858	667480	959979
sp|Q9VA02|DHTK1_DROME	Q9VA02	DHTK1_DROME	CG1544	Probable 2-oxoglutarate dehydrogenase E1 component DHKTD1 homolog, mitochondrial	1.11226e+06	757843	542339	826105	403193	817668
sp|Q9VA38|WARTS_DROME	Q9VA38	WARTS_DROME	wts	Serine/threonine-protein kinase Warts	885677	661741	700321	739192	745847	706196
sp|Q9VA73-2|CMC_DROME	Q9VA73-2	CMC_DROME	aralar1	Isoform 2 of Calcium-binding mitochondrial carrier protein Aralar1	870189	651443	888249	712631	702280	630042
sp|Q9VA91|RS7_DROME	Q9VA91	RS7_DROME	RpS7	40S ribosomal protein S7	1.02504e+06	624257	820157	695528	636071	658617
sp|Q9VAD6|COG7_DROME	Q9VAD6	COG7_DROME	Cog7	Conserved oligomeric Golgi complex subunit 7	725630	873451	686830	686478	668192	790305
sp|Q9VAI1|CIA30_DROME	Q9VAI1	CIA30_DROME	CG7598	Probable complex I intermediate-associated protein 30, mitochondrial	783773	892383	612142	802532	537500	813114
sp|Q9VAI6|OB99B_DROME	Q9VAI6	OB99B_DROME	Obp99b	General odorant-binding protein 99b	1.45936e+06	365993	662963	712512	741370	536995
sp|Q9VAJ4|OB99A_DROME	Q9VAJ4	OB99A_DROME	Obp99a	General odorant-binding protein 99a	283736	1.17799e+06	490777	999744	341162	1.10698e+06
sp|Q9VAL0|SPCS1_DROME	Q9VAL0	SPCS1_DROME	Spase12	Signal peptidase complex subunit 1	900207	687022	745642	644900	936676	537678
sp|Q9VAM6|CISD2_DROME	Q9VAM6	CISD2_DROME	CG1458	CDGSH iron-sulfur domain-containing protein 2 homolog	786571	756648	638197	831266	599576	819633
sp|Q9VAM9|MESH1_DROME	Q9VAM9	MESH1_DROME	Mesh1	Guanosine-3',5'-bis(diphosphate) 3'-pyrophosphohydrolase MESH1	877485	545556	824246	731578	729110	725733
sp|Q9VAN0|SERC_DROME	Q9VAN0	SERC_DROME	CG11899	Probable phosphoserine aminotransferase	816168	626977	919657	678189	759531	644308
sp|Q9VAN6|SLBP_DROME	Q9VAN6	SLBP_DROME	Slbp	Histone RNA hairpin-binding protein	727087	590454	828103	660844	934549	678960
sp|Q9VAP3|CTLH2_DROME	Q9VAP3	CTLH2_DROME	CG11880	CTL-like protein 2	586078	778836	694047	817130	714727	824439
sp|Q9VAQ1|SIR7_DROME	Q9VAQ1	SIR7_DROME	Sirt7	NAD-dependent protein deacetylase Sirt7	672039	568980	724133	642994	1.14906e+06	647493
sp|Q9VAQ5|DIM1_DROME	Q9VAQ5	DIM1_DROME	CG11837	Probable dimethyladenosine transferase	658368	716205	925831	622459	783171	720375
sp|Q9VAQ7|SLU7_DROME	Q9VAQ7	SLU7_DROME	Slu7	Pre-mRNA-splicing factor Slu7	777477	566577	945171	610011	839022	688741
sp|Q9VAS7|INX3_DROME	Q9VAS7	INX3_DROME	Inx3	Innexin inx3	692863	570026	813204	666109	961481	707513
sp|Q9VAU9|ZN330_DROME	Q9VAU9	ZN330_DROME	Noa36	Zinc finger protein 330 homolog	897045	992625	857025	630169	558625	553664
sp|Q9VAW5|LARP_DROME	Q9VAW5	LARP_DROME	larp	La-related protein	933338	650612	878542	653466	664649	671723
sp|Q9VAY3|MFRN_DROME	Q9VAY3	MFRN_DROME	mfrn	Mitoferrin	622071	994051	565609	860875	526706	862452
sp|Q9VAY7|FAM50_DROME	Q9VAY7	FAM50_DROME	CG12259	Protein FAM50 homolog	694928	565412	869228	554670	889021	823112
sp|Q9VB08|RING1_DROME	Q9VB08	RING1_DROME	Sce	E3 ubiquitin-protein ligase RING1	587008	499965	704314	659112	1.13097e+06	795028
sp|Q9VB14|RS10A_DROME	Q9VB14	RS10A_DROME	RpS10a	40S ribosomal protein S10a	664412	826549	932873	711757	698974	620131
sp|Q9VB31|C6A18_DROME	Q9VB31	C6A18_DROME	Cyp6a18	Probable cytochrome P450 6a18	545026	909975	294865	1.67346e+06	254237	792036
sp|Q9VB62|DPOA2_DROME	Q9VB62	DPOA2_DROME	DNApol-alpha73	DNA polymerase alpha subunit B	569197	753960	668974	785450	802409	826064
sp|Q9VB70|LST2_DROME	Q9VB70	LST2_DROME	CG6051	Lateral signaling target protein 2 homolog	766835	575092	643633	760644	887517	775387
sp|Q9VB74|U396_DROME	Q9VB74	U396_DROME	CG6066	UPF0396 protein CG6066	741774	696479	665333	750776	830404	737901
sp|Q9VBG6|FA203_DROME	Q9VBG6	FA203_DROME	CG6073	FAM203 family protein CG6073	823850	657795	846683	683581	741620	686607
sp|Q9VBP3|TNKS_DROME	Q9VBP3	TNKS_DROME	Tnks	Tankyrase	721253	753512	714089	708268	745902	779997
sp|Q9VBP9|NPL4_DROME	Q9VBP9	NPL4_DROME	Npl4	Nuclear protein localization protein 4 homolog	814978	741991	753527	749436	637436	744153
sp|Q9VBV5|SIL1_DROME	Q9VBV5	SIL1_DROME	CG10420	Nucleotide exchange factor SIL1	778217	730378	870812	735783	634263	698602
sp|Q9VBX1|NEMF_DROME	Q9VBX1	NEMF_DROME	Clbn	Nuclear export mediator factor NEMF homolog	745946	801366	775123	748609	619659	750526
sp|Q9VBX2|MOC2B_DROME	Q9VBX2	MOC2B_DROME	Mocs2	Molybdopterin synthase catalytic subunit	958387	516465	954933	646772	769029	606434
sp|Q9VC45|ASP_DROME	Q9VC45	ASP_DROME	asp	Protein abnormal spindle	511983	791432	803280	703584	968821	642836
sp|Q9VC49|RPAB5_DROME	Q9VC49	RPAB5_DROME	Rpb10	DNA-directed RNA polymerases I, II, and III subunit RPABC5	824488	623668	746695	758089	752425	726723
sp|Q9VC57|ATLAS_DROME	Q9VC57	ATLAS_DROME	atl	Atlastin	955556	733035	772837	686782	688122	625166
sp|Q9VC61-2|CRERF_DROME	Q9VC61-2	CRERF_DROME	CG13624	Isoform 2 of Protein CREBRF homolog	892503	553062	940417	664866	784526	613149
sp|Q9VCA2|ORCT_DROME	Q9VCA2	ORCT_DROME	Orct	Organic cation transporter protein	932070	337233	1.07565e+06	449128	1.27631e+06	371801
sp|Q9VCA5|SYFB_DROME	Q9VCA5	SYFB_DROME	CG5706	Probable phenylalanine--tRNA ligase beta subunit	854735	768054	697538	712532	627352	777956
sp|Q9VCA8|ANKHM_DROME	Q9VCA8	ANKHM_DROME	mask	Ankyrin repeat and KH domain-containing protein mask	706922	619198	794646	708904	884256	706166
sp|Q9VCA9|SPCS3_DROME	Q9VCA9	SPCS3_DROME	Spase22-23	Signal peptidase complex subunit 3	905462	710218	767571	654795	885202	534634
sp|Q9VCC0|CHRD1_DROME	Q9VCC0	CHRD1_DROME	CHORD	Cysteine and histidine-rich domain-containing protein	874225	686188	747499	696405	707458	726793
sp|Q9VCC3|RT24_DROME	Q9VCC3	RT24_DROME	mRpS24	28S ribosomal protein S24, mitochondrial	821051	753996	733700	744171	621880	764919
sp|Q9VCD0|GATB_DROME	Q9VCD0	GATB_DROME	CG5463	Glutamyl-tRNA(Gln) amidotransferase subunit B, mitochondrial	719922	849116	611179	863895	565260	825025
sp|Q9VCE6|MTA70_DROME	Q9VCE6	MTA70_DROME	Ime4	Probable N6-adenosine-methyltransferase MT-A70-like protein	639719	694926	710918	720601	953677	695987
sp|Q9VCE8|U692_DROME	Q9VCE8	U692_DROME	CG33108	UPF0692 protein CG33108	622242	689975	881200	691193	744985	787279
sp|Q9VCG3|OPA32_DROME	Q9VCG3	OPA32_DROME	CG13601	Putative OPA3-like protein CG13603	811700	850103	658068	772965	557989	792063
sp|Q9VCG4|NDC1_DROME	Q9VCG4	NDC1_DROME	Ndc1	Nucleoporin Ndc1	654165	784397	668401	774534	761861	777887
sp|Q9VCI0|ORN_DROME	Q9VCI0	ORN_DROME	CG10214	Probable oligoribonuclease	804669	679810	805265	710354	719136	717640
sp|Q9VCI3|LSD1_DROME	Q9VCI3	LSD1_DROME	Lsd-1	Lipid storage droplets surface-binding protein 1	906905	404164	1.32367e+06	476912	879694	468962
sp|Q9VCK0|EI3D1_DROME	Q9VCK0	EI3D1_DROME	eIF-3p66	Eukaryotic translation initiation factor 3 subunit D-1	872092	718927	848810	692640	706590	618944
sp|Q9VCP0|ELOA1_DROME	Q9VCP0	ELOA1_DROME	EloA	Transcription elongation factor B polypeptide 3	727771	682515	678094	543825	892996	867193
sp|Q9VCR6|SAV_DROME	Q9VCR6	SAV_DROME	sav	Scaffold protein salvador	697918	779769	692811	812844	715687	735148
sp|Q9VCU5|MTG1_DROME	Q9VCU5	MTG1_DROME	CG17141	Mitochondrial ribosome-associated GTPase 1	844403	656198	679368	714802	731769	796375
sp|Q9VCU7|VRET_DROME	Q9VCU7	VRET_DROME	vret	Protein vreteno	463672	1.04744e+06	637254	882416	485614	907541
sp|Q9VCU9|DCR1_DROME	Q9VCU9	DCR1_DROME	Dcr-1	Endoribonuclease Dcr-1	794893	751117	773159	754573	677772	694741
sp|Q9VCW1|CP6D4_DROME	Q9VCW1	CP6D4_DROME	Cyp6d4	Probable cytochrome P450 6d4	479265	1.13905e+06	427363	1.0033e+06	417818	958093
sp|Q9VCX3|RM45_DROME	Q9VCX3	RM45_DROME	mRpL45	Probable 39S ribosomal protein L45, mitochondrial	847831	778163	791378	686833	658416	688211
sp|Q9VCX4|RRF2M_DROME	Q9VCX4	RRF2M_DROME	EF-G2	Ribosome-releasing factor 2, mitochondrial	779575	782690	798030	692382	648939	739189
sp|Q9VCY3|CSN6_DROME	Q9VCY3	CSN6_DROME	CSN6	COP9 signalosome complex subunit 6	918903	706026	863008	626600	742770	601266
sp|Q9VCY8-2|ADRL_DROME	Q9VCY8-2	ADRL_DROME	AdipoR	Isoform 2 of Adiponectin receptor protein	964574	732762	918214	615329	484175	743092
sp|Q9VD25|RPC6_DROME	Q9VD25	RPC6_DROME	CG5380	Probable DNA-directed RNA polymerase III subunit RPC6	798068	702808	756573	655892	789199	726709
sp|Q9VD26|ZFPL1_DROME	Q9VD26	ZFPL1_DROME	CG5382	Zinc finger protein-like 1 homolog	796940	720318	736433	708792	779559	694470
sp|Q9VD28|JMJD6_DROME	Q9VD28	JMJD6_DROME	PSR	Bifunctional arginine demethylase and lysyl-hydroxylase PSR	624369	746753	703858	787662	648501	897316
sp|Q9VD44|GLD2A_DROME	Q9VD44	GLD2A_DROME	Gld2	Poly(A) RNA polymerase gld-2 homolog A	661329	618054	1.19237e+06	662524	837817	487756
sp|Q9VD51|DDX18_DROME	Q9VD51	DDX18_DROME	pit	Probable ATP-dependent RNA helicase pitchoune	636899	821880	728143	789659	669457	782767
sp|Q9VD92|ARCH_DROME	Q9VD92	ARCH_DROME	CG6353	Protein archease-like	742574	786107	663645	856898	619711	769470
sp|Q9VDD1|DDRGK_DROME	Q9VDD1	DDRGK_DROME	CG5862	DDRGK domain-containing protein 1	1.00575e+06	615646	785661	797644	671138	592347
sp|Q9VDD7|S35B1_DROME	Q9VDD7	S35B1_DROME	meigo	Solute carrier family 35 member B1 homolog	852504	710929	843025	698555	768422	584474
sp|Q9VDD9|TRM72_DROME	Q9VDD9	TRM72_DROME	CG7009	Putative tRNA (cytidine(32)/guanosine(34)-2'-O)-methyltransferase 2	730620	745367	636323	781456	718773	808588
sp|Q9VDE5|PPAN_DROME	Q9VDE5	PPAN_DROME	ppan	Protein Peter pan	746338	801540	690527	713751	704106	773524
sp|Q9VDE6|EXOC6_DROME	Q9VDE6	EXOC6_DROME	sec15	Exocyst complex component 6	733066	781599	748209	622872	805839	734539
sp|Q9VDG2|RLIP_DROME	Q9VDG2	RLIP_DROME	Rlip	RalA-binding protein 1	604877	804816	659238	805355	818426	731020
sp|Q9VDL1|U483_DROME	Q9VDL1	U483_DROME	CG5412	UPF0483 protein CG5412	951556	638333	861262	681545	676591	646841
sp|Q9VDM6|EI3G2_DROME	Q9VDM6	EI3G2_DROME	eIF3-S4-2	Eukaryotic translation initiation factor 3 subunit G-2	793011	570407	870450	664003	869180	662914
sp|Q9VDQ7|NAA25_DROME	Q9VDQ7	NAA25_DROME	psidin	Phagocyte signaling-impaired protein	802523	703748	827041	704838	708540	695421
sp|Q9VDR1|MED25_DROME	Q9VDR1	MED25_DROME	MED25	Mediator of RNA polymerase II transcription subunit 25	597076	721294	686972	745010	865289	790848
sp|Q9VDS5|RG92B_DROME	Q9VDS5	RG92B_DROME	RhoGAP92B	Rho GTPase-activating protein 92B	788540	317890	1.06844e+06	414871	1.0132e+06	784895
sp|Q9VDS6|SURF6_DROME	Q9VDS6	SURF6_DROME	Surf6	Surfeit locus protein 6 homolog	692653	860690	661053	792890	657577	769979
sp|Q9VDT6|RRMJ1_DROME	Q9VDT6	RRMJ1_DROME	CG11447	Putative ribosomal RNA methyltransferase CG11447	728169	785550	749266	747200	657952	766147
sp|Q9VDV3|NUPL1_DROME	Q9VDV3	NUPL1_DROME	Nup58	Probable nucleoporin Nup58	990483	480159	963551	452472	990132	562409
sp|Q9VDW6|DMDA_DROME	Q9VDW6	DMDA_DROME	Dys	Dystrophin, isoforms A/C/F/G/H	599663	820012	724482	696972	813188	763521
sp|Q9VDY1|INO80_DROME	Q9VDY1	INO80_DROME	Ino80	Putative DNA helicase Ino80	640188	725347	675707	710595	940114	721359
sp|Q9VE00|C12A4_DROME	Q9VE00	C12A4_DROME	Cyp12a4	Probable cytochrome P450 12a4, mitochondrial	574117	954149	358212	1.15411e+06	419993	962917
sp|Q9VE01|C12A5_DROME	Q9VE01	C12A5_DROME	Cyp12a5	Probable cytochrome P450 12a5, mitochondrial	508819	944228	445474	964078	604972	940106
sp|Q9VE04|RM55_DROME	Q9VE04	RM55_DROME	mRpL55	39S ribosomal protein L55, mitochondrial	941110	562530	1.01771e+06	543801	620725	753155
sp|Q9VE09|GATA_DROME	Q9VE09	GATA_DROME	gatA	Glutamyl-tRNA(Gln) amidotransferase subunit A, mitochondrial	841268	762087	717064	756345	621887	745400
sp|Q9VE11|U488_DROME	Q9VE11	U488_DROME	CG14286	UPF0488 protein CG14286	844648	414879	823162	495842	816096	981102
sp|Q9VE34|EPG5_DROME	Q9VE34	EPG5_DROME	CG14299	Ectopic P granules protein 5 homolog	828160	741257	726208	721768	688944	732906
sp|Q9VE50|GOSR1_DROME	Q9VE50	GOSR1_DROME	Gos28	Golgi SNAP receptor complex member 1	807657	594806	702084	747604	639268	916206
sp|Q9VE51|CPSF3_DROME	Q9VE51	CPSF3_DROME	Cpsf73	Cleavage and polyadenylation specificity factor 73	759181	814010	656346	729742	705156	767223
sp|Q9VE61|RN181_DROME	Q9VE61	RN181_DROME	CG7694	E3 ubiquitin-protein ligase RNF181 homolog	1.06783e+06	411535	841051	570812	920747	624224
sp|Q9VEA5|RPB4_DROME	Q9VEA5	RPB4_DROME	Rpb4	DNA-directed RNA polymerase II 16 kDa polypeptide	819788	428904	812007	713630	915174	723710
sp|Q9VEB3|RPF2_DROME	Q9VEB3	RPF2_DROME	CG7993	Ribosome production factor 2 homolog	682116	908804	658438	802807	578925	805326
sp|Q9VEC1|MED17_DROME	Q9VEC1	MED17_DROME	MED17	Mediator of RNA polymerase II transcription subunit 17	662137	737514	666861	842141	820709	699974
sp|Q9VEC3|ARP5_DROME	Q9VEC3	ARP5_DROME	Arp5	Actin-related protein 5	643921	684573	630490	729241	932542	781959
sp|Q9VED0|TAPT1_DROME	Q9VED0	TAPT1_DROME	CG7218	Protein TAPT1 homolog	656269	787341	775189	700040	765401	742332
sp|Q9VEG9|NRM_DROME	Q9VEG9	NRM_DROME	nrm	Nurim homolog	669392	739252	711349	609899	859932	814619
sp|Q9VEJ2|NOP14_DROME	Q9VEJ2	NOP14_DROME	l(3)07882	Nucleolar protein 14 homolog	728316	736821	690744	741092	709048	814300
sp|Q9VEK6|SUR8_DROME	Q9VEK6	SUR8_DROME	Sur-8	Leucine-rich repeat protein soc-2 homolog	760549	743860	647937	758979	831066	690328
sp|Q9VEP1|TRM71_DROME	Q9VEP1	TRM71_DROME	CG5220	Putative tRNA (cytidine(32)/guanosine(34)-2'-O)-methyltransferase 1	898425	604237	835734	667296	688304	741995
sp|Q9VES1|AR6P1_DROME	Q9VES1	AR6P1_DROME	CG10326	ARL-6-interacting protein 1 homolog	638086	668024	933202	723356	966898	515569
sp|Q9VEX5|ASUN_DROME	Q9VEX5	ASUN_DROME	Asun	Protein asunder	670723	748081	598815	820471	782302	795989
sp|Q9VEZ5|IKKB_DROME	Q9VEZ5	IKKB_DROME	ird5	Inhibitor of nuclear factor kappa-B kinase subunit beta	881198	685632	699310	764750	672233	737417
sp|Q9VF08|TIM16_DROME	Q9VF08	TIM16_DROME	blp	Mitochondrial import inner membrane translocase subunit Tim16	987115	542987	957668	662311	694801	613907
sp|Q9VF26|SPNE_DROME	Q9VF26	SPNE_DROME	spn-E	Probable ATP-dependent RNA helicase spindle-E	218532	1.34746e+06	277191	1.0251e+06	226616	1.28668e+06
sp|Q9VF36|ACYP2_DROME	Q9VF36	ACYP2_DROME	Acyp2	Acylphosphatase-2	822841	613924	971266	651474	785236	604431
sp|Q9VF71|CUTC_DROME	Q9VF71	CUTC_DROME	CG6136	Copper homeostasis protein cutC homolog	586125	763423	821324	706839	899241	651162
sp|Q9VF78|COG2_DROME	Q9VF78	COG2_DROME	ldlCp	Conserved oligomeric Golgi complex subunit 2	756670	772341	704553	713516	711305	770832
sp|Q9VF87|CYFIP_DROME	Q9VF87	CYFIP_DROME	Sra-1	Cytoplasmic FMR1-interacting protein	634585	888230	639110	804473	757465	711517
sp|Q9VF89|RM09_DROME	Q9VF89	RM09_DROME	mRpL9	39S ribosomal protein L9, mitochondrial	855495	729714	819147	719711	674431	655849
sp|Q9VFB7|TPC10_DROME	Q9VFB7	TPC10_DROME	SIDL	Trafficking protein particle complex subunit 10	792398	683790	801605	727571	699892	730836
sp|Q9VFC0|SCC4_DROME	Q9VFC0	SCC4_DROME	CG4203	MAU2 chromatid cohesion factor homolog	625232	762838	723978	756980	838392	716306
sp|Q9VFC8|GYS_DROME	Q9VFC8	GYS_DROME	CG6904	Putative glycogen [starch] synthase	606032	732927	974501	592498	745425	768425
sp|Q9VFE4|RS5B_DROME	Q9VFE4	RS5B_DROME	RpS5b	40S ribosomal protein S5b	778523	720517	1.0382e+06	674835	738094	519238
sp|Q9VFE6|RRP15_DROME	Q9VFE6	RRP15_DROME	CG3817	RRP15-like protein	536972	965296	554341	834767	520028	994433
sp|Q9VFG8|KIBRA_DROME	Q9VFG8	KIBRA_DROME	kibra	Protein kibra	882815	552175	788975	653608	659749	876001
sp|Q9VFJ2|RM11_DROME	Q9VFJ2	RM11_DROME	mRpL11	39S ribosomal protein L11, mitochondrial	905184	809218	716691	686799	650447	686168
sp|Q9VFJ3|HTRA2_DROME	Q9VFJ3	HTRA2_DROME	HtrA2	Serine protease HTRA2, mitochondrial	679682	727759	749434	726257	632612	895187
sp|Q9VFL5|SYMM_DROME	Q9VFL5	SYMM_DROME	Aats-met	Methionine--tRNA ligase, mitochondrial	668966	923375	552097	832101	553426	893589
sp|Q9VFM9|TWF_DROME	Q9VFM9	TWF_DROME	twf	Twinfilin	772371	782342	776948	830536	683795	614370
sp|Q9VFP1|CP6D5_DROME	Q9VFP1	CP6D5_DROME	Cyp6d5	Probable cytochrome P450 6d5	812096	784133	540087	963750	482701	855554
sp|Q9VFP2|RDX_DROME	Q9VFP2	RDX_DROME	rdx	Protein roadkill	724384	753549	565007	779104	790358	803501
sp|Q9VFR0|BCCIP_DROME	Q9VFR0	BCCIP_DROME	CG9286	Protein BCCIP homolog	736958	679040	1.00364e+06	673088	727161	629072
sp|Q9VFR1|F206_DROME	Q9VFR1	F206_DROME	CG9288	FAM206 family protein CG9288	768712	666319	809983	655561	796082	729618
sp|Q9VFS5|PP4R3_DROME	Q9VFS5	PP4R3_DROME	flfl	Serine/threonine-protein phosphatase 4 regulatory subunit 3	568052	772188	694597	725474	980005	676379
sp|Q9VFS8|PSMD9_DROME	Q9VFS8	PSMD9_DROME	CG9588	26S proteasome non-ATPase regulatory subunit 9	831264	606197	878758	676924	766135	678949
sp|Q9VG17|CP304_DROME	Q9VG17	CP304_DROME	Cyp304a1	Probable cytochrome P450 304a1	460590	1.05792e+06	625115	1.22564e+06	480933	625937
sp|Q9VG73|ILF2_DROME	Q9VG73	ILF2_DROME	CG5641	Interleukin enhancer-binding factor 2 homolog	614236	836803	750678	725555	723548	773989
sp|Q9VG82|CP9F2_DROME	Q9VG82	CP9F2_DROME	Cyp9f2	Probable cytochrome P450 9f2	767239	640166	674248	730493	884356	723292
sp|Q9VG93|GSTT7_DROME	Q9VG93	GSTT7_DROME	GstD7	Glutathione S-transferase D7	546927	954393	353282	1.1004e+06	212789	1.22649e+06
sp|Q9VG94|GSTT6_DROME	Q9VG94	GSTT6_DROME	GstD6	Glutathione S-transferase D6	197618	1.30579e+06	140312	1.26627e+06	87010.7	1.38061e+06
sp|Q9VG95|GSTT5_DROME	Q9VG95	GSTT5_DROME	GstD5	Glutathione S-transferase D5	107341	2.02366e+06	77280.8	1.18364e+06	66584.4	1.00118e+06
sp|Q9VG96|GSTT4_DROME	Q9VG96	GSTT4_DROME	GstD4	Glutathione S-transferase D4	355206	1.06109e+06	212648	1.15114e+06	172912	1.41001e+06
sp|Q9VG97|GSTT3_DROME	Q9VG97	GSTT3_DROME	GstD3	Glutathione S-transferase D3	535947	1.13577e+06	299607	1.03964e+06	370795	1.03578e+06
sp|Q9VG98|GSTT2_DROME	Q9VG98	GSTT2_DROME	GstD2	Glutathione S-transferase D2	286287	1.21029e+06	111452	1.51769e+06	129585	1.15948e+06
sp|Q9VGC3|COG1_DROME	Q9VGC3	COG1_DROME	CG4848	Conserved oligomeric Golgi complex subunit 1	807842	797997	723097	712114	662477	737835
sp|Q9VGC7|EI3D2_DROME	Q9VGC7	EI3D2_DROME	eIF3-S7-2	Eukaryotic translation initiation factor 3 subunit D-2	621626	607224	1.41343e+06	591860	954056	293180
sp|Q9VGG5|CAD87_DROME	Q9VGG5	CAD87_DROME	Cad87A	Cadherin-87A	631367	816428	511133	823010	888404	746134
sp|Q9VGH1|CP315_DROME	Q9VGH1	CP315_DROME	sad	Cytochrome P450 315a1, mitochondrial	838107	1.32962e+06	351599	447138	1.01625e+06	484587
sp|Q9VGH7-6|CLCN2_DROME	Q9VGH7-6	CLCN2_DROME	ClC-a	Isoform G of Chloride channel protein 2	757897	754715	541209	946535	563919	863171
sp|Q9VGI8|BLM_DROME	Q9VGI8	BLM_DROME	Blm	Bloom syndrome protein homolog	354579	1.07729e+06	467429	918306	584177	996055
sp|Q9VGK7|ELP1_DROME	Q9VGK7	ELP1_DROME	Elp1	Putative elongator complex protein 1	696715	780345	769124	766721	654604	766095
sp|Q9VGN9|RLP24_DROME	Q9VGN9	RLP24_DROME	RpL24-like	Probable ribosome biogenesis protein RLP24	600821	880255	733102	785654	645006	785823
sp|Q9VGP1|ZFY26_DROME	Q9VGP1	ZFY26_DROME	CG5270	Zinc finger FYVE domain-containing protein 26 homolog	1.04527e+06	523792	790352	714850	745226	633472
sp|Q9VGP2|NINAG_DROME	Q9VGP2	NINAG_DROME	ninaG	Neither inactivation nor afterpotential protein G	176614	1.45489e+06	151154	1.11675e+06	128517	1.35281e+06
sp|Q9VGP6|PFD3_DROME	Q9VGP6	PFD3_DROME	CG6719	Probable prefoldin subunit 3	779406	729980	652891	780879	700494	784382
sp|Q9VGR2|NDUF7_DROME	Q9VGR2	NDUF7_DROME	CG17726	NADH dehydrogenase [ubiquinone] complex I, assembly factor 7 homolog	794317	764148	755731	778376	568488	780253
sp|Q9VGR7|Y6693_DROME	Q9VGR7	Y6693_DROME	CG6693	J domain-containing protein CG6693	540545	708149	695504	660785	1.09858e+06	696472
sp|Q9VGS2|TCTP_DROME	Q9VGS2	TCTP_DROME	Tctp	Translationally-controlled tumor protein homolog	1.04349e+06	657627	855060	661302	622720	627181
sp|Q9VGU5|TTC14_DROME	Q9VGU5	TTC14_DROME	CG6621	Tetratricopeptide repeat protein 14 homolog	732087	662990	722924	730049	855799	718631
sp|Q9VGW6|MCM5_DROME	Q9VGW6	MCM5_DROME	Mcm5	DNA replication licensing factor Mcm5	469243	772275	671086	698892	1.00051e+06	781399
sp|Q9VGX3|FAU_DROME	Q9VGX3	FAU_DROME	fau	Protein anoxia up-regulated	454685	1.50582e+06	405955	1.25266e+06	339516	553582
sp|Q9VGX3-3|FAU_DROME	Q9VGX3-3	FAU_DROME	fau	Isoform C of Protein anoxia up-regulated	553937	1.16071e+06	469360	1.22963e+06	436664	633915
sp|Q9VGZ0|C12E1_DROME	Q9VGZ0	C12E1_DROME	Cyp12e1	Probable cytochrome P450 12e1, mitochondrial	875600	658234	909864	695910	728132	591714
sp|Q9VH07|RUVB1_DROME	Q9VH07	RUVB1_DROME	pont	RuvB-like helicase 1	621386	756934	937321	702265	803829	620688
sp|Q9VH20|TAF1B_DROME	Q9VH20	TAF1B_DROME	CG6241	TATA box-binding protein-associated factor RNA polymerase I subunit B	637498	747730	764960	616552	750723	883610
sp|Q9VH38|TFB2M_DROME	Q9VH38	TFB2M_DROME	mtTFB2	Dimethyladenosine transferase 2, mitochondrial	682677	838262	662873	831366	602090	814116
sp|Q9VH39|NDUF4_DROME	Q9VH39	NDUF4_DROME	CG11722	Protein NDUFAF4 homolog	848676	659829	925248	689446	611692	712698
sp|Q9VH48|CARM1_DROME	Q9VH48	CARM1_DROME	Art4	Probable histone-arginine methyltransferase CARMER	640080	679255	795653	662973	943765	694333
sp|Q9VH69|RS29_DROME	Q9VH69	RS29_DROME	RpS29	40S ribosomal protein S29	844094	463381	874800	762392	709032	770988
sp|Q9VH78|ALG12_DROME	Q9VH78	ALG12_DROME	CG8412	Probable Dol-P-Man:Man(7)GlcNAc(2)-PP-Dol alpha-1,6-mannosyltransferase	931948	742257	647882	742169	689523	695430
sp|Q9VH95|YC17_DROME	Q9VH95	YC17_DROME	CG16817	Uncharacterized protein CG16817	832995	690764	896157	707147	686524	640540
sp|Q9VHB3|USB1_DROME	Q9VHB3	USB1_DROME	CG16790	U6 snRNA phosphodiesterase	579637	809838	633640	789942	726088	867978
sp|Q9VHB6|MTX1_DROME	Q9VHB6	MTX1_DROME	CG9393	Metaxin-1 homolog	752098	764108	784836	784556	694012	668936
sp|Q9VHB9|TRM44_DROME	Q9VHB9	TRM44_DROME	trmt44	Probable tRNA (uracil-O(2)-)-methyltransferase	756995	865227	737501	741508	558910	782647
sp|Q9VHD2|MAAI2_DROME	Q9VHD2	MAAI2_DROME	GstZ2	Probable maleylacetoacetate isomerase 2	574760	654510	663947	704785	944633	844971
sp|Q9VHD3|MAAI1_DROME	Q9VHD3	MAAI1_DROME	GstZ1	Probable maleylacetoacetate isomerase 1	740793	771269	528446	843371	597480	930564
sp|Q9VHF2|PTER_DROME	Q9VHF2	PTER_DROME	CG18473	Phosphotriesterase-related protein	284961	1.13099e+06	253540	1.19488e+06	253585	1.26342e+06
sp|Q9VHH7|ADAL_DROME	Q9VHH7	ADAL_DROME	Ada	Adenosine deaminase-like protein	528636	1.02535e+06	462276	965544	412606	1.01879e+06
sp|Q9VHH9|JHD1_DROME	Q9VHH9	JHD1_DROME	Kdm2	JmjC domain-containing histone demethylation protein 1	696497	765128	615348	757461	810896	773258
sp|Q9VHI4|SF3B5_DROME	Q9VHI4	SF3B5_DROME	CG11985	Probable splicing factor 3B subunit 5	687458	443909	790252	717077	921425	830312
sp|Q9VHM2|U505_DROME	Q9VHM2	U505_DROME	CG8202	UPF0505 protein CG8202	610007	772725	769827	721491	809171	738596
sp|Q9VHN3|CDPF1_DROME	Q9VHN3	CDPF1_DROME	CG11755	Cysteine-rich DPF motif domain-containing protein 1	793523	675798	727920	688969	893987	652413
sp|Q9VHN6|RM19_DROME	Q9VHN6	RM19_DROME	mRpL19	39S ribosomal protein L19, mitochondrial	811323	757177	748477	728850	677697	719006
sp|Q9VHN9|HPS5_DROME	Q9VHN9	HPS5_DROME	p	Hermansky-Pudlak syndrome 5 protein homolog	876505	571108	971018	643294	774781	612516
sp|Q9VHP0|DDX3_DROME	Q9VHP0	DDX3_DROME	bel	ATP-dependent RNA helicase bel	890685	737820	808512	627655	658927	721300
sp|Q9VHR6|ATG13_DROME	Q9VHR6	ATG13_DROME	Atg13	Autophagy-related protein 13 homolog	789029	659083	713803	854353	670588	748968
sp|Q9VHR8|DPP3_DROME	Q9VHR8	DPP3_DROME	DppIII	Dipeptidyl peptidase 3	686494	903549	590860	800570	564659	878798
sp|Q9VHS2|COX7A_DROME	Q9VHS2	COX7A_DROME	CG9603	Probable cytochrome c oxidase subunit 7A, mitochondrial	1.14136e+06	464876	808456	730630	626293	684388
sp|Q9VHS7|COQ2_DROME	Q9VHS7	COQ2_DROME	Coq2	4-hydroxybenzoate polyprenyltransferase, mitochondrial	649637	796008	720132	790233	582373	880676
sp|Q9VHT4|FUCT1_DROME	Q9VHT4	FUCT1_DROME	nac	GDP-fucose transporter 1	670341	835557	741038	767233	720133	704872
sp|Q9VHU1|DDX55_DROME	Q9VHU1	DDX55_DROME	CG9630	Probable ATP-dependent RNA helicase DDX55 homolog	706760	653456	889099	607719	865331	700331
sp|Q9VHV5|ARL8_DROME	Q9VHV5	ARL8_DROME	Gie	ADP-ribosylation factor-like protein 8	784203	760111	663235	781946	666186	777413
sp|Q9VI10|SMD2_DROME	Q9VI10	SMD2_DROME	SmD2	Probable small nuclear ribonucleoprotein Sm D2	636521	692210	686010	743940	828618	818115
sp|Q9VI25|NCDN_DROME	Q9VI25	NCDN_DROME	Neurochondrin	Neurochondrin homolog	506322	933007	500161	832895	736215	894299
sp|Q9VI55|UFL1_DROME	Q9VI55	UFL1_DROME	CG1104	E3 UFM1-protein ligase 1 homolog	901501	736523	675210	783636	658737	695455
sp|Q9VI74|SHQ1_DROME	Q9VI74	SHQ1_DROME	CG10055	Protein SHQ1 homolog	770332	1.12985e+06	728753	687965	529761	631470
sp|Q9VI82|NOC3L_DROME	Q9VI82	NOC3L_DROME	CG1234	Nucleolar complex protein 3 homolog	692125	897535	668971	826102	562718	792753
sp|Q9VIE6|MCM10_DROME	Q9VIE6	MCM10_DROME	Mcm10	Protein MCM10 homolog	271152	900556	406291	1.08935e+06	500192	1.19702e+06
sp|Q9VIF0|NOC2L_DROME	Q9VIF0	NOC2L_DROME	CG9246	Nucleolar complex protein 2 homolog	698104	853651	730387	766373	631246	758983
sp|Q9VIF1|MUT7_DROME	Q9VIF1	MUT7_DROME	CG9247	Probable exonuclease mut-7 homolog	740233	696347	782404	706958	820231	685902
sp|Q9VIL0|BRU_DROME	Q9VIL0	BRU_DROME	bru	Protein brunelleschi	795421	701972	821948	724696	664361	731195
sp|Q9VIM5|ARPC2_DROME	Q9VIM5	ARPC2_DROME	Arpc2	Actin-related protein 2/3 complex subunit 2	654419	810642	630836	816403	715475	795435
sp|Q9VIP8|VLS_DROME	Q9VIP8	VLS_DROME	vls	Protein valois	617039	934878	669400	858717	514433	840439
sp|Q9VIR2|TOTF_DROME	Q9VIR2	TOTF_DROME	TotF	Protein Turandot F	67758.9	1.41924e+06	85660.9	1.76942e+06	63055.2	1.037e+06
sp|Q9VIU7|DPM1_DROME	Q9VIU7	DPM1_DROME	CG10166	Probable dolichol-phosphate mannosyltransferase	911998	685886	719439	689429	857524	586835
sp|Q9VIV3|CTU2_DROME	Q9VIV3	CTU2_DROME	CG10189	Cytoplasmic tRNA 2-thiolation protein 2	786641	627025	927163	686435	821961	597499
sp|Q9VIW7|RTCB_DROME	Q9VIW7	RTCB_DROME	CG9987	tRNA-splicing ligase RtcB homolog	599523	972251	564021	839935	500308	942654
sp|Q9VJ26|EFHD2_DROME	Q9VJ26	EFHD2_DROME	Swip-1	EF-hand domain-containing protein D2 homolog	366153	1.09367e+06	366661	1.03708e+06	763534	792465
sp|Q9VJ34|GSTCD_DROME	Q9VJ34	GSTCD_DROME	CG10428	Glutathione S-transferase C-terminal domain-containing protein homolog	750205	701317	899541	697106	726604	668615
sp|Q9VJ38|RM13_DROME	Q9VJ38	RM13_DROME	mRpL13	39S ribosomal protein L13, mitochondrial	835272	798376	813858	645397	666317	690327
sp|Q9VJ62|NAF1_DROME	Q9VJ62	NAF1_DROME	CG10341	H/ACA ribonucleoprotein complex non-core subunit NAF1	511973	827750	718566	779435	718219	852683
sp|Q9VJ71|CP310_DROME	Q9VJ71	CP310_DROME	Cyp310a1	Probable cytochrome P450 310a1	728768	850694	614027	832738	365832	1.02485e+06
sp|Q9VJ79|PDE11_DROME	Q9VJ79	PDE11_DROME	Pde11	Dual 3',5'-cyclic-AMP and -GMP phosphodiesterase 11	630088	810995	683439	772802	774293	752796
sp|Q9VJ87|CWC22_DROME	Q9VJ87	CWC22_DROME	ncm	Pre-mRNA-splicing factor CWC22 homolog	541528	961198	600175	807855	630231	875768
sp|Q9VJ97|JMJD4_DROME	Q9VJ97	JMJD4_DROME	CG7200	JmjC domain-containing protein 4 homolog	876626	730892	786433	571957	756248	714514
sp|Q9VJC7|EFTS_DROME	Q9VJC7	EFTS_DROME	CG6412	Elongation factor Ts, mitochondrial	880545	813675	630886	747290	545177	822247
sp|Q9VJE4|RPB11_DROME	Q9VJE4	RPB11_DROME	Rpb11	DNA-directed RNA polymerase II subunit RPB11	716247	583251	647052	666010	934426	844031
sp|Q9VJI9|NUBP1_DROME	Q9VJI9	NUBP1_DROME	CG17904	Cytosolic Fe-S cluster assembly factor NUBP1 homolog	822522	645679	807795	660293	763051	730786
sp|Q9VJQ4|MCES_DROME	Q9VJQ4	MCES_DROME	l(2)35Bd	mRNA cap guanine-N7 methyltransferase	746837	778768	724514	707715	778897	698947
sp|Q9VJQ5|NC2B_DROME	Q9VJQ5	NC2B_DROME	NC2beta	Protein Dr1	716684	542346	968588	579560	978236	636000
sp|Q9VJY6|RL24_DROME	Q9VJY6	RL24_DROME	RpL24	60S ribosomal protein L24	965451	665224	788384	662808	682844	685230
sp|Q9VJZ7|RRP1L_DROME	Q9VJZ7	RRP1L_DROME	Nnp-1	Ribosomal RNA processing protein 1 homolog	669708	833675	631915	778172	658343	847942
sp|Q9VK89|TRM1_DROME	Q9VK89	TRM1_DROME	CG6388	Probable tRNA (guanine(26)-N(2))-dimethyltransferase	849358	580637	929622	591796	786358	695122
sp|Q9VKB4|RPF1_DROME	Q9VKB4	RPF1_DROME	CG6712	Probable ribosome production factor 1	674043	879555	589290	814007	579134	885596
sp|Q9VKB9|RBGPR_DROME	Q9VKB9	RBGPR_DROME	rab3-GAP	Rab3 GTPase-activating protein regulatory subunit	948524	742827	724932	591547	714759	719537
sp|Q9VKD3|NFS1_DROME	Q9VKD3	NFS1_DROME	CG12264	Probable cysteine desulfurase, mitochondrial	661423	926193	585382	860978	475850	916463
sp|Q9VKH0|COG8_DROME	Q9VKH0	COG8_DROME	CG6488	Conserved oligomeric Golgi complex subunit 8	927469	688012	822010	625793	746849	641032
sp|Q9VKH6|PPT2_DROME	Q9VKH6	PPT2_DROME	Ppt2	Lysosomal thioesterase PPT2 homolog	1.37488e+06	476659	646338	684285	769406	526867
sp|Q9VKJ1|MPND_DROME	Q9VKJ1	MPND_DROME	CG4751	MPN domain-containing protein CG4751	525264	631853	620811	691737	1.25871e+06	661836
sp|Q9VKJ3|NU160_DROME	Q9VKJ3	NU160_DROME	Nup160	Nuclear pore complex protein Nup160 homolog	649363	811244	654371	740005	766297	796590
sp|Q9VKK1|EDC4_DROME	Q9VKK1	EDC4_DROME	Ge-1	Enhancer of mRNA-decapping protein 4 homolog	557941	899301	585470	776384	698737	889400
sp|Q9VKK2|WDR59_DROME	Q9VKK2	WDR59_DROME	CG4705	WD repeat-containing protein 59 homolog	769377	682131	841409	724204	715058	706084
sp|Q9VKM1|PIWI_DROME	Q9VKM1	PIWI_DROME	piwi	Protein piwi	724885	654118	1.0061e+06	650816	854101	559010
sp|Q9VKM6|VPS72_DROME	Q9VKM6	VPS72_DROME	YL-1	Vacuolar protein sorting-associated protein 72 homolog	687430	642898	653812	662465	994331	760059
sp|Q9VKN7|AURKB_DROME	Q9VKN7	AURKB_DROME	ial	Aurora kinase B	278794	1.114e+06	355126	949070	752834	941809
sp|Q9VKQ6|SMG8_DROME	Q9VKQ6	SMG8_DROME	CG6729	Protein SMG8	495584	505381	1.34657e+06	445887	1.19051e+06	443433
sp|Q9VKU7|GCP4_DROME	Q9VKU7	GCP4_DROME	Grip75	Gamma-tubulin complex component 4 homolog	545337	868290	494799	901830	696728	898711
sp|Q9VKV5|CD2B2_DROME	Q9VKV5	CD2B2_DROME	holn1	CD2 antigen cytoplasmic tail-binding protein 2 homolog	866661	661027	879724	651451	823764	571564
sp|Q9VL00|OTUBL_DROME	Q9VL00	OTUBL_DROME	CG4968	Ubiquitin thioesterase otubain-like	813904	726444	807861	774546	748609	587528
sp|Q9VL13|MOB3_DROME	Q9VL13	MOB3_DROME	Mob3	MOB kinase activator-like 3	669137	754287	983045	688031	618277	728211
sp|Q9VL18|EF1D_DROME	Q9VL18	EF1D_DROME	eEF1delta	Probable elongation factor 1-delta	956778	578133	825326	822485	611419	664364
sp|Q9VL52|SOYB_DROME	Q9VL52	SOYB_DROME	SoYb	Putative ATP-dependent RNA helicase SoYb	446927	969014	536627	930653	533092	987627
sp|Q9VL59|ZGPAT_DROME	Q9VL59	ZGPAT_DROME	CG4709	Zinc finger CCCH-type with G patch domain-containing protein	762017	629129	749019	745995	741706	791904
sp|Q9VL72|SMRCD_DROME	Q9VL72	SMRCD_DROME	Etl1	SWI/SNF-related matrix-associated actin-dependent regulator of chromatin subfamily A containing DEAD/H box 1 homolog	586798	835905	636528	759687	848538	750216
sp|Q9VL78|FKB59_DROME	Q9VL78	FKB59_DROME	FKBP59	FK506-binding protein 59	774253	779039	829052	724650	649802	692087
sp|Q9VL86|CBPA1_DROME	Q9VL86	CBPA1_DROME	CG17633	Zinc carboxypeptidase A 1	555277	986767	455347	1.35856e+06	475026	644798
sp|Q9VL92|CP4E3_DROME	Q9VL92	CP4E3_DROME	Cyp4e3	Cytochrome P450 4e3	262071	659994	1.55763e+06	688950	729292	549026
sp|Q9VL96|PESC_DROME	Q9VL96	PESC_DROME	CG4364	Pescadillo homolog	656344	854349	709067	759594	666171	784463
sp|Q9VLC0|VPS54_DROME	Q9VLC0	VPS54_DROME	scat	Vacuolar protein sorting-associated protein 54	750057	690825	758765	691832	829764	706506
sp|Q9VLC1|FUCTB_DROME	Q9VLC1	FUCTB_DROME	FucTB	Alpha-(1,3)-fucosyltransferase B	568791	867319	720606	901309	607392	770707
sp|Q9VLD6|BOREA_DROME	Q9VLD6	BOREA_DROME	borr	Borealin	289575	684413	405327	685847	945714	1.29104e+06
sp|Q9VLJ0|PDE6D_DROME	Q9VLJ0	PDE6D_DROME	PrBP	Probable cGMP 3',5'-cyclic phosphodiesterase subunit delta	797543	756149	729088	688177	689036	771654
sp|Q9VLJ9|RM51_DROME	Q9VLJ9	RM51_DROME	mRpL51	39S ribosomal protein L51, mitochondrial	857492	659911	797016	712988	622840	784490
sp|Q9VLK2|Y3096_DROME	Q9VLK2	Y3096_DROME	CG13096	Ribosomal L1 domain-containing protein CG13096	720601	814003	697164	663452	748553	780139
sp|Q9VLM5|DAD1_DROME	Q9VLM5	DAD1_DROME	l(2)k12914	Dolichyl-diphosphooligosaccharide--protein glycosyltransferase subunit DAD1	694397	783958	622850	819645	674051	827011
sp|Q9VLM8|SYAC_DROME	Q9VLM8	SYAC_DROME	Aats-ala	Alanine--tRNA ligase, cytoplasmic	857029	741438	796378	703672	632017	717063
sp|Q9VLP3|MSS4_DROME	Q9VLP3	MSS4_DROME	CG7787	Guanine nucleotide exchange factor MSS4 homolog	626782	936924	650130	937843	659316	646186
sp|Q9VLP7|MET14_DROME	Q9VLP7	MET14_DROME	CG7818	Methyltransferase-like protein 14 homolog	752447	721944	696445	629859	868680	748197
sp|Q9VLP9|PORED_DROME	Q9VLP9	PORED_DROME	CG7840	Polyprenol reductase	722436	705074	822339	705940	859576	623738
sp|Q9VLQ1|ALG5_DROME	Q9VLQ1	ALG5_DROME	wol	Dolichyl-phosphate beta-glucosyltransferase	922354	683571	794245	625518	818502	606551
sp|Q9VLR5|TCP4_DROME	Q9VLR5	TCP4_DROME	Ssb-c31a	RNA polymerase II transcriptional coactivator	450447	700893	596113	1.04145e+06	509431	1.085e+06
sp|Q9VLS9|LACB2_DROME	Q9VLS9	LACB2_DROME	CG12375	Beta-lactamase-like protein 2 homolog	967071	697331	855475	728277	618223	604460
sp|Q9VLT1|MON2_DROME	Q9VLT1	MON2_DROME	mon2	Protein MON2 homolog	691404	813825	727223	713325	739247	745206
sp|Q9VLT8|CCD53_DROME	Q9VLT8	CCD53_DROME	CG7429	WASH complex subunit CCDC53 homolog	869680	689405	763257	717815	690318	712195
sp|Q9VLU5|WWOX_DROME	Q9VLU5	WWOX_DROME	Wwox	WW domain-containing oxidoreductase	1.01816e+06	644866	860432	710627	659708	578188
sp|Q9VLV5|RUXE_DROME	Q9VLV5	RUXE_DROME	SmE	Probable small nuclear ribonucleoprotein E	621600	813459	683536	805524	757252	745779
sp|Q9VM17|SOSSB_DROME	Q9VM17	SOSSB_DROME	CG5181	SOSS complex subunit B homolog	697949	755111	704940	659104	861841	739981
sp|Q9VM33|EFGM_DROME	Q9VM33	EFGM_DROME	ico	Elongation factor G, mitochondrial	848600	861009	579407	865157	478078	815642
sp|Q9VM60|MCMBP_DROME	Q9VM60	MCMBP_DROME	CG3430	Mini-chromosome maintenance complex-binding protein	621032	933553	601377	543229	726098	967070
sp|Q9VM64|IHOG_DROME	Q9VM64	IHOG_DROME	ihog	Interference hedgehog	527973	601118	700384	609448	1.41762e+06	539798
sp|Q9VM75|HEAT1_DROME	Q9VM75	HEAT1_DROME	l(2)k09022	HEAT repeat-containing protein 1 homolog	648274	867877	594210	818491	583591	904456
sp|Q9VM92|TTL3B_DROME	Q9VM92	TTL3B_DROME	TTLL3B	Tubulin glycylase 3B	838783	793103	896271	761876	645662	542186
sp|Q9VM95|AATF_DROME	Q9VM95	AATF_DROME	Aatf	Protein Aatf	703299	777519	651972	757859	596739	923945
sp|Q9VMA7|TGO1_DROME	Q9VMA7	TGO1_DROME	Tango1	Transport and Golgi organization protein 1	855121	695677	731129	725358	740429	693654
sp|Q9VMC8|PHF5_DROME	Q9VMC8	PHF5_DROME	CG9548	Uncharacterized protein CG9548	592528	956411	604972	782272	695747	794564
sp|Q9VMC9|KFA_DROME	Q9VMC9	KFA_DROME	KFase	Kynurenine formamidase	1.31289e+06	359791	1.21457e+06	439056	718397	445047
sp|Q9VMD9|TIG_DROME	Q9VMD9	TIG_DROME	Tig	Tiggrin	643756	876919	609569	889557	725630	696074
sp|Q9VMH7|N6MT2_DROME	Q9VMH7	N6MT2_DROME	CG9154	N(6)-adenine-specific DNA methyltransferase 2 homolog	982128	767096	655446	570078	702020	760830
sp|Q9VMN5|CH60C_DROME	Q9VMN5	CH60C_DROME	Hsp60C	60 kDa heat shock protein homolog 2, mitochondrial	651273	614495	1.40177e+06	604068	923827	290270
sp|Q9VMQ5|COQ6_DROME	Q9VMQ5	COQ6_DROME	CG7277	Putative ubiquinone biosynthesis monooxygenase COQ6	637810	897464	532772	937617	516021	902732
sp|Q9VMQ7|ELP4_DROME	Q9VMQ7	ELP4_DROME	CG6907	Putative elongator complex protein 4	607504	843708	652768	750232	637038	916491
sp|Q9VMS7|C4AC3_DROME	Q9VMS7	C4AC3_DROME	Cyp4ac3	Probable cytochrome P450 4ac3	767346	897475	529520	848209	550365	842383
sp|Q9VMS9|C4AC1_DROME	Q9VMS9	C4AC1_DROME	Cyp4ac1	Probable cytochrome P450 4ac1	789037	929215	513935	846039	346203	1.00215e+06
sp|Q9VMT5|C28D1_DROME	Q9VMT5	C28D1_DROME	Cyp28d1	Probable cytochrome P450 28d1	909190	676342	765458	739532	678910	680762
sp|Q9VMT6|C28D2_DROME	Q9VMT6	C28D2_DROME	Cyp28d2	Probable cytochrome P450 28d2	780042	675430	671747	806282	543313	937070
sp|Q9VMW7|ITPA_DROME	Q9VMW7	ITPA_DROME	CG8891	Inosine triphosphate pyrophosphatase	778894	719127	812119	636350	661580	816213
sp|Q9VMW8|MPU1_DROME	Q9VMW8	MPU1_DROME	CG3792	Mannose-P-dolichol utilization defect 1 protein homolog	621611	895014	656115	820654	646056	791497
sp|Q9VMW9|GMDS_DROME	Q9VMW9	GMDS_DROME	Gmd	GDP-mannose 4,6 dehydratase	676080	840794	710676	712808	726013	762239
sp|Q9VMX1|KBP_DROME	Q9VMX1	KBP_DROME	CG14043	Protein KBP homolog	720826	682252	843356	760137	766907	666042
sp|Q9VMX6|SMAL1_DROME	Q9VMX6	SMAL1_DROME	Marcal1	SWI/SNF-related matrix-associated actin-dependent regulator of chromatin subfamily A-like protein 1	421435	992371	597641	902898	568368	928049
sp|Q9VMY1|RM24_DROME	Q9VMY1	RM24_DROME	mRpL24	Probable 39S ribosomal protein L24, mitochondrial	878810	798293	735885	725274	641809	676116
sp|Q9VN03|SUV3_DROME	Q9VN03	SUV3_DROME	CG9791	ATP-dependent RNA helicase SUV3 homolog, mitochondrial	721100	905557	568571	859015	532456	847972
sp|Q9VN14|CONT_DROME	Q9VN14	CONT_DROME	Cont	Contactin	579734	738349	721016	605991	1.21278e+06	557929
sp|Q9VN19|GET4_DROME	Q9VN19	GET4_DROME	CG9853	Golgi to ER traffic protein 4 homolog	764268	781937	839849	737541	675283	654239
sp|Q9VN25|EIF3A_DROME	Q9VN25	EIF3A_DROME	eIF3-S10	Eukaryotic translation initiation factor 3 subunit A	835485	708457	838541	713686	703120	652034
sp|Q9VN27|LIPT2_DROME	Q9VN27	LIPT2_DROME	CG9804	Putative lipoyltransferase 2, mitochondrial	800335	733044	730552	619768	735030	802565
sp|Q9VN45|SPG20_DROME	Q9VN45	SPG20_DROME	spartin	Protein spartin	785420	808258	612058	785524	608620	830289
sp|Q9VN50|EI3F1_DROME	Q9VN50	EI3F1_DROME	eIF3-S5-1	Eukaryotic translation initiation factor 3 subunit F-1	841621	678956	884824	661829	745855	636302
sp|Q9VN93|CPR1_DROME	Q9VN93	CPR1_DROME	CG12163	Putative cysteine proteinase CG12163	704894	771673	616232	810617	824672	702458
sp|Q9VNA5|PSB4_DROME	Q9VNA5	PSB4_DROME	Prosbeta7	Proteasome subunit beta type-4	839780	770733	818456	711791	629491	683606
sp|Q9VND8|RHEB_DROME	Q9VND8	RHEB_DROME	Rheb	GTP-binding protein Rheb homolog	766301	729644	993621	700125	725991	549583
sp|Q9VNE2|PKRA_DROME	Q9VNE2	PKRA_DROME	kra	Protein krasavietz	870884	630174	886407	657519	766726	635661
sp|Q9VNE7|C42ES_DROME	Q9VNE7	C42ES_DROME	Spec2	CDC42 small effector protein homolog	458666	794125	623629	835793	826497	857742
sp|Q9VNE9|RL13A_DROME	Q9VNE9	RL13A_DROME	RpL13A	60S ribosomal protein L13a	989512	861421	785049	196875	718205	866330
sp|Q9VNG0|MED27_DROME	Q9VNG0	MED27_DROME	MED27	Mediator of RNA polymerase II transcription subunit 27	682014	691996	732631	700304	889540	721501
sp|Q9VNG1|GGNB2_DROME	Q9VNG1	GGNB2_DROME	CG2182	Gametogenetin-binding protein 2-like	955589	642304	745664	710050	720957	673642
sp|Q9VNH1|BN3D2_DROME	Q9VNH1	BN3D2_DROME	CG1239	Probable RNA methyltransferase CG1239	651612	802462	729561	757273	620928	857827
sp|Q9VNH6|EXOC4_DROME	Q9VNH6	EXOC4_DROME	sec8	Exocyst complex component 4	691357	747056	857509	679261	797124	664854
sp|Q9VNI3|U609_DROME	Q9VNI3	U609_DROME	CG1218	UPF0609 protein CG1218	526421	897017	599947	800146	736324	850102
sp|Q9VNJ5|DISP_DROME	Q9VNJ5	DISP_DROME	disp	Protein dispatched	578924	897984	647647	871487	722878	717429
sp|Q9VNS0|MAEL_DROME	Q9VNS0	MAEL_DROME	mael	Protein maelstrom	284895	1.3849e+06	388123	1.03043e+06	287564	1.04531e+06
sp|Q9VNT5|TRXR2_DROME	Q9VNT5	TRXR2_DROME	Trxr-2	Thioredoxin reductase 2, mitochondrial	675799	623055	1.25243e+06	610540	911107	396565
sp|Q9VNV3|DDX1_DROME	Q9VNV3	DDX1_DROME	Ddx1	ATP-dependent RNA helicase Ddx1	715848	822016	799281	710052	679701	714643
sp|Q9VP04|ORMDL_DROME	Q9VP04	ORMDL_DROME	ORMDL	ORM1-like protein	616248	618351	873317	627579	855390	810068
sp|Q9VP05|MED1_DROME	Q9VP05	MED1_DROME	MED1	Mediator of RNA polymerase II transcription subunit 1	663128	722874	726066	708317	917964	683958
sp|Q9VP47|TSR1_DROME	Q9VP47	TSR1_DROME	CG7338	Pre-rRNA-processing protein TSR1 homolog	695499	790789	846211	674806	687268	740154
sp|Q9VPC0|KP58_DROME	Q9VPC0	KP58_DROME	Pitslre	Serine/threonine-protein kinase PITSLRE	667506	666716	642603	730842	759236	926011
sp|Q9VPD2|NUBP2_DROME	Q9VPD2	NUBP2_DROME	CG4858	Cytosolic Fe-S cluster assembly factor NUBP2 homolog	839131	874635	617363	829356	550628	742898
sp|Q9VPH2|PRI2_DROME	Q9VPH2	PRI2_DROME	DNApol-alpha60	DNA primase large subunit	338781	1.00797e+06	475848	888486	640493	1.03261e+06
sp|Q9VPK7|PUS10_DROME	Q9VPK7	PUS10_DROME	Pus10	Putative tRNA pseudouridine synthase Pus10	746084	677506	870283	662842	852618	629109
sp|Q9VPL3|RM10_DROME	Q9VPL3	RM10_DROME	mRpL10	39S ribosomal protein L10, mitochondrial	804521	810762	800708	750263	555590	730446
sp|Q9VPP5|RNH2A_DROME	Q9VPP5	RNH2A_DROME	CG13690	Ribonuclease H2 subunit A	326607	1.02951e+06	391973	867368	804539	962341
sp|Q9VPR4|NLE_DROME	Q9VPR4	NLE_DROME	Nle	Protein Notchless	777555	732446	853054	639477	744428	692041
sp|Q9VPS5|CH60B_DROME	Q9VPS5	CH60B_DROME	Hsp60B	60 kDa heat shock protein homolog 1, mitochondrial	617592	668455	1.04059e+06	712722	943975	470746
sp|Q9VPT8|CPSF4_DROME	Q9VPT8	CPSF4_DROME	Clp	Cleavage and polyadenylation specificity factor subunit 4	750242	791193	548468	887148	635661	816805
sp|Q9VPU8|KRR1_DROME	Q9VPU8	KRR1_DROME	dbe	KRR1 small subunit processome component homolog	682956	826328	673718	797195	647592	801333
sp|Q9VPW1|ASTE_DROME	Q9VPW1	ASTE_DROME	ast	Protein asteroid	941887	566424	928095	561004	931127	523938
sp|Q9VQ26|RB3GP_DROME	Q9VQ26	RB3GP_DROME	CG31935	Rab3 GTPase-activating protein catalytic subunit	841204	719027	724302	690660	743493	718056
sp|Q9VQ62|NPC2_DROME	Q9VQ62	NPC2_DROME	Npc2a	Protein NPC2 homolog	765933	754972	580474	975894	576619	786274
sp|Q9VQ89|MIO_DROME	Q9VQ89	MIO_DROME	mio	WD repeat-containing protein mio	763335	704557	793790	717623	763261	694005
sp|Q9VQ93|GOLP3_DROME	Q9VQ93	GOLP3_DROME	rti	Golgi phosphoprotein 3 homolog rotini	845670	532066	755871	514256	1.01847e+06	737454
sp|Q9VQF9|SNAPN_DROME	Q9VQF9	SNAPN_DROME	snapin	SNAPIN protein homolog	910498	674033	773375	537424	723302	804611
sp|Q9VQG4|COLT_DROME	Q9VQG4	COLT_DROME	colt	Congested-like trachea protein	1.177e+06	546409	741646	654695	650744	685767
sp|Q9VQM4|TYDP1_DROME	Q9VQM4	TYDP1_DROME	gkt	Probable tyrosyl-DNA phosphodiesterase	568112	932523	572584	836565	586459	917415
sp|Q9VQQ9|EXOC2_DROME	Q9VQQ9	EXOC2_DROME	sec5	Exocyst complex component 2	764925	772680	781404	653303	761031	703086
sp|Q9VQZ6|ELP3_DROME	Q9VQZ6	ELP3_DROME	Elp3	Probable elongator complex protein 3	692343	835560	676195	776658	663859	786109
sp|Q9VR52|TILB_DROME	Q9VR52	TILB_DROME	tilB	Protein tilB	695083	764955	966279	633529	778143	610375
sp|Q9VR56|TM10A_DROME	Q9VR56	TM10A_DROME	trmt10a	tRNA methyltransferase 10 homolog A	781553	735537	858341	689987	646196	729865
sp|Q9VR59|VIP1_DROME	Q9VR59	VIP1_DROME	l(1)G0196	Inositol hexakisphosphate and diphosphoinositol-pentakisphosphate kinase	467748	984448	562696	930539	506394	960189
sp|Q9VR89|PNO1_DROME	Q9VR89	PNO1_DROME	l(1)G0004	RNA-binding protein pno1	598532	841189	873811	730746	660034	732687
sp|Q9VR91|HERC2_DROME	Q9VR91	HERC2_DROME	HERC2	Probable E3 ubiquitin-protein ligase HERC2	697983	802197	706594	679405	738218	796652
sp|Q9VR99|CATIN_DROME	Q9VR99	CATIN_DROME	cactin	Cactin	648764	931419	578160	541696	803630	895307
sp|Q9VRA2|MOCOS_DROME	Q9VRA2	MOCOS_DROME	mal	Molybdenum cofactor sulfurase	589457	1.01305e+06	467511	888799	438434	1.01531e+06
sp|Q9VRB3|CP6V1_DROME	Q9VRB3	CP6V1_DROME	Cyp6v1	Probable cytochrome P450 6v1	1.05544e+06	644161	508418	846751	661762	731231
sp|Q9VRG7|CNEP1_DROME	Q9VRG7	CNEP1_DROME	Dd	CTD nuclear envelope phosphatase 1 homolog	686343	734009	683005	762488	792344	762716
sp|Q9VRH6|GUF1_DROME	Q9VRH6	GUF1_DROME	waw	Translation factor waclaw, mitochondrial	784175	706468	743782	753724	699057	746757
sp|Q9VRI9|CP6T1_DROME	Q9VRI9	CP6T1_DROME	Cyp6t1	Probable cytochrome P450 6t1	417842	1.00852e+06	358437	1.18344e+06	399351	1.04084e+06
sp|Q9VRJ1|SYAM_DROME	Q9VRJ1	SYAM_DROME	Aats-ala-m	Alanine--tRNA ligase, mitochondrial	735571	904282	510896	935553	439074	907984
sp|Q9VRJ2|FITM_DROME	Q9VRJ2	FITM_DROME	CG10671	FIT family protein CG10671	713743	917850	996232	671399	659478	520192
sp|Q9VRL2|GOSR2_DROME	Q9VRL2	GOSR2_DROME	membrin	Probable Golgi SNAP receptor complex member 2	774736	571030	829702	709743	931261	616119
sp|Q9VRL3|PFD4_DROME	Q9VRL3	PFD4_DROME	CG10635	Probable prefoldin subunit 4	864526	441585	754998	550251	914851	863266
sp|Q9VRP5|UBP36_DROME	Q9VRP5	UBP36_DROME	scny	Ubiquitin carboxyl-terminal hydrolase 36	822402	627450	727473	736069	752158	760554
sp|Q9VRP9|BRE1_DROME	Q9VRP9	BRE1_DROME	Bre1	E3 ubiquitin-protein ligase Bre1	656480	694469	719312	706824	963068	678331
sp|Q9VRV7|PM14_DROME	Q9VRV7	PM14_DROME	CG13298	Pre-mRNA branch site p14-like protein	664838	846264	661443	807323	720174	734467
sp|Q9VS38|MED4_DROME	Q9VS38	MED4_DROME	MED4	Mediator of RNA polymerase II transcription subunit 4	692851	672197	678216	691109	962255	715898
sp|Q9VS46|RINT1_DROME	Q9VS46	RINT1_DROME	CG8605	RINT1-like protein	914210	714906	728635	550978	783129	738925
sp|Q9VS60|SMSR1_DROME	Q9VS60	SMSR1_DROME	SMSr	Sphingomyelin synthase-related 1	532519	887312	872922	764331	727833	658480
sp|Q9VS79|CP4D8_DROME	Q9VS79	CP4D8_DROME	Cyp4d8	Cytochrome P450 4d8	281540	1.05545e+06	425289	1.20639e+06	337290	1.09536e+06
sp|Q9VS97|PGPSD_DROME	Q9VS97	PGPSD_DROME	PGRP-SD	Peptidoglycan-recognition protein SD	742620	635299	553206	1.16921e+06	601497	741773
sp|Q9VSA3|ACADM_DROME	Q9VSA3	ACADM_DROME	CG12262	Probable medium-chain specific acyl-CoA dehydrogenase, mitochondrial	700782	571632	1.12069e+06	711835	770413	575583
sp|Q9VSC1|SRP09_DROME	Q9VSC1	SRP09_DROME	Srp9	Signal recognition particle 9 kDa protein	874528	455370	825169	798630	718715	755258
sp|Q9VSD7|DBR1_DROME	Q9VSD7	DBR1_DROME	ldbr	Lariat debranching enzyme	735926	758612	654541	689113	844652	739247
sp|Q9VSF2|MED24_DROME	Q9VSF2	MED24_DROME	MED24	Mediator of RNA polymerase II transcription subunit 24	632779	754398	622381	750597	929266	725035
sp|Q9VSF4|DHYS_DROME	Q9VSF4	DHYS_DROME	CG8005	Probable deoxyhypusine synthase	955807	604835	950412	558747	804932	580182
sp|Q9VSH9|U183_DROME	Q9VSH9	U183_DROME	CG7083	UPF0183 protein CG7083	964367	611680	717637	733099	710713	705738
sp|Q9VSJ8|EXOC7_DROME	Q9VSJ8	EXOC7_DROME	exo70	Exocyst complex component 7	820902	704257	850408	594113	796478	672125
sp|Q9VSS2|SRP68_DROME	Q9VSS2	SRP68_DROME	Srp68	Signal recognition particle subunit SRP68	999211	615549	837781	749312	688989	577709
sp|Q9VSY4|ATAT1_DROME	Q9VSY4	ATAT1_DROME	CG3967	Alpha-tubulin N-acetyltransferase 1	687018	455430	962977	463863	895288	912031
sp|Q9VSY6|SERB_DROME	Q9VSY6	SERB_DROME	aay	Phosphoserine phosphatase	686344	598785	1.04773e+06	828871	746057	550764
sp|Q9VSZ6|QTRD1_DROME	Q9VSZ6	QTRD1_DROME	CG3434	Queuine tRNA-ribosyltransferase subunit QTRTD1 homolog	913514	615166	893053	583696	811502	628249
sp|Q9VT57|CDK8_DROME	Q9VT57	CDK8_DROME	Cdk8	Cyclin-dependent kinase 8	642428	762014	587044	678230	979210	755835
sp|Q9VT67|LS12B_DROME	Q9VT67	LS12B_DROME	CG14164	Protein LSM12 homolog B	657596	828926	990796	686272	729068	568083
sp|Q9VTC4|U195A_DROME	Q9VTC4	U195A_DROME	CG7949	MIP18 family protein CG7949	847926	668698	761603	783791	633966	745141
sp|Q9VTF9|UFD1_DROME	Q9VTF9	UFD1_DROME	Ufd1-like	Ubiquitin fusion degradation protein 1 homolog	716381	796159	730491	778813	669363	745792
sp|Q9VTJ4|FUCO_DROME	Q9VTJ4	FUCO_DROME	Fuca	Putative alpha-L-fucosidase	862784	608748	694086	689613	891556	681517
sp|Q9VTL1|PCID2_DROME	Q9VTL1	PCID2_DROME	PCID2	PCI domain-containing protein 2 homolog	787577	709668	785847	685835	838418	633850
sp|Q9VTM0|BL1S6_DROME	Q9VTM0	BL1S6_DROME	pallidin	Biogenesis of lysosome-related organelles complex 1 subunit 6	696829	700278	716820	798354	654469	850513
sp|Q9VTM5|TFB1M_DROME	Q9VTM5	TFB1M_DROME	mtTFB1	Dimethyladenosine transferase 1, mitochondrial	675294	786136	719611	799245	633888	812861
sp|Q9VTP4|R10AB_DROME	Q9VTP4	R10AB_DROME	RpL10Ab	60S ribosomal protein L10a-2	962571	638657	839085	699168	673993	643900
sp|Q9VTT9|DEFI8_DROME	Q9VTT9	DEFI8_DROME	CG11534	Differentially expressed in FDCP 8 homolog	756418	718539	850524	667848	688526	750943
sp|Q9VTU0|KRI1_DROME	Q9VTU0	KRI1_DROME	CG5645	Protein KRI1 homolog	748171	711019	822263	769994	676003	713344
sp|Q9VTU4|EIF3L_DROME	Q9VTU4	EIF3L_DROME	CG5642	Eukaryotic translation initiation factor 3 subunit L	874368	657999	893886	652304	748365	624688
sp|Q9VTX8|ODR4_DROME	Q9VTX8	ODR4_DROME	CG10616	Protein odr-4 homolog	864142	776923	703955	768413	661115	678876
sp|Q9VTY6|UBE2C_DROME	Q9VTY6	UBE2C_DROME	vih	Ubiquitin-conjugating enzyme E2 C	748419	583389	818703	624629	1.15573e+06	501192
sp|Q9VTZ6|PMM_DROME	Q9VTZ6	PMM_DROME	CG10688	Probable phosphomannomutase	963770	613157	880051	657448	670285	667859
sp|Q9VU02|SMD1_DROME	Q9VU02	SMD1_DROME	SmD1	Probable small nuclear ribonucleoprotein Sm D1	487653	900841	614342	896586	716866	803131
sp|Q9VU41|ZMY10_DROME	Q9VU41	ZMY10_DROME	CG11253	Zinc finger MYND domain-containing protein 10 homolog	815536	493021	1.36991e+06	502947	986663	310128
sp|Q9VU58|NPLP2_DROME	Q9VU58	NPLP2_DROME	Nplp2	Neuropeptide-like 2	484855	178972	1.49727e+06	518500	1.31593e+06	417534
sp|Q9VU65|POC1_DROME	Q9VU65	POC1_DROME	Poc1	POC1 centriolar protein homolog	364165	1.00993e+06	558714	865781	733471	872522
sp|Q9VU68|WDR1_DROME	Q9VU68	WDR1_DROME	flr	Actin-interacting protein 1	610685	951535	561583	840179	624433	837672
sp|Q9VU84|DBNL_DROME	Q9VU84	DBNL_DROME	Abp1	Drebrin-like protein	648435	681929	608114	859142	768330	841658
sp|Q9VU87|VPS36_DROME	Q9VU87	VPS36_DROME	Vps36	Vacuolar protein-sorting-associated protein 36	869054	617422	838391	665166	755251	692868
sp|Q9VU95|AGT2L_DROME	Q9VU95	AGT2L_DROME	CG8745	Alanine--glyoxylate aminotransferase 2-like	1.0348e+06	464618	924747	638791	706376	676912
sp|Q9VUA0|GPTC1_DROME	Q9VUA0	GPTC1_DROME	CG8833	G patch domain-containing protein 1 homolog	790524	722617	719760	730398	793645	680776
sp|Q9VUJ0|RM39_DROME	Q9VUJ0	RM39_DROME	mRpL39	39S ribosomal protein L39, mitochondrial	1.0897e+06	628557	806315	583091	707387	642533
sp|Q9VUL1|PYRG_DROME	Q9VUL1	PYRG_DROME	CTPsyn	CTP synthase	684450	742484	833553	673439	712012	778459
sp|Q9VUM0|MSH6_DROME	Q9VUM0	MSH6_DROME	Msh6	Probable DNA mismatch repair protein Msh6	520005	899030	768753	779397	745717	718621
sp|Q9VUQ5|AGO2_DROME	Q9VUQ5	AGO2_DROME	AGO2	Protein argonaute-2	678852	963136	597278	837322	520137	840257
sp|Q9VUR0|UFSP2_DROME	Q9VUR0	UFSP2_DROME	UFSP2	Probable Ufm1-specific protease 2	868684	762600	632947	711539	721194	740063
sp|Q9VUR7|PHLP_DROME	Q9VUR7	PHLP_DROME	CG7650	Phosducin-like protein	763231	776087	745615	751714	697126	708122
sp|Q9VUV9|U520_DROME	Q9VUV9	U520_DROME	l(3)72Ab	Putative U5 small nuclear ribonucleoprotein 200 kDa helicase	712148	772461	685969	730717	793045	733150
sp|Q9VUY9|PGM_DROME	Q9VUY9	PGM_DROME	Pgm	Phosphoglucomutase	1.10776e+06	548988	1.01406e+06	428945	726240	629430
sp|Q9VUZ1|TPPC2_DROME	Q9VUZ1	TPPC2_DROME	l(3)72Dh	Probable trafficking protein particle complex subunit 2	800712	653427	868508	673049	847267	601868
sp|Q9VV41|OSGEP_DROME	Q9VV41	OSGEP_DROME	CG4933	Probable tRNA N6-adenosine threonylcarbamoyltransferase	685095	779551	712697	757793	739570	753390
sp|Q9VV74|SMN_DROME	Q9VV74	SMN_DROME	Smn	Survival motor neuron protein	715110	637862	725225	697689	961199	681382
sp|Q9VV96|PGSB2_DROME	Q9VV96	PGSB2_DROME	PGRP-SB2	Peptidoglycan-recognition protein SB2	920573	964401	382598	1.06831e+06	573387	578261
sp|Q9VVB4|CCD22_DROME	Q9VVB4	CCD22_DROME	CG9951	Coiled-coil domain-containing protein 22 homolog	726331	636649	775616	696297	778883	800035
sp|Q9VVD9|S35B3_DROME	Q9VVD9	S35B3_DROME	Papst2	Adenosine 3'-phospho 5'-phosphosulfate transporter 2	538185	942982	676178	746870	674518	839419
sp|Q9VVE2|ROGDI_DROME	Q9VVE2	ROGDI_DROME	rogdi	Protein rogdi	557706	898211	574632	796775	674140	905265
sp|Q9VVG4|EXOC1_DROME	Q9VVG4	EXOC1_DROME	sec3	Exocyst complex component 1	705718	730196	756647	722531	791468	721680
sp|Q9VVI2|EDC3_DROME	Q9VVI2	EDC3_DROME	Edc3	Enhancer of mRNA-decapping protein 3	712563	708172	800367	671234	808175	724947
sp|Q9VVL6|MED19_DROME	Q9VVL6	MED19_DROME	MED19	Mediator of RNA polymerase II transcription subunit 19	718395	651089	788588	686520	959313	624836
sp|Q9VVN2|RT26_DROME	Q9VVN2	RT26_DROME	mRpS26	Probable 28S ribosomal protein S26, mitochondrial	827739	768168	754216	789394	557147	751801
sp|Q9VVN4|ATRIP_DROME	Q9VVN4	ATRIP_DROME	mus304	ATR-interacting protein mus304	744432	719181	814085	741796	812991	613701
sp|Q9VVR9|C12C1_DROME	Q9VVR9	C12C1_DROME	Cyp12c1	Probable cytochrome P450 12c1, mitochondrial	636987	1.03306e+06	626835	815821	478346	848352
sp|Q9VVT2|INDY1_DROME	Q9VVT2	INDY1_DROME	Indy	Protein I'm not dead yet	903492	826464	886179	584771	548577	709207
sp|Q9VVU5|CSN1_DROME	Q9VVU5	CSN1_DROME	CSN1b	COP9 signalosome complex subunit 1b	795235	749996	941453	607080	699255	656669
sp|Q9VVW8|NNRD_DROME	Q9VVW8	NNRD_DROME	CG10424	ATP-dependent (S)-NAD(P)H-hydrate dehydratase	945902	603831	775528	715184	793195	616953
sp|Q9VVX0|GEMI2_DROME	Q9VVX0	GEMI2_DROME	Gem2	Protein Gemin2	467919	1.06784e+06	558921	909917	489494	927049
sp|Q9VVX5|MBOA5_DROME	Q9VVX5	MBOA5_DROME	nes	Lysophospholipid acyltransferase 5	590963	1.06883e+06	577132	792782	676261	735346
sp|Q9VW09|LTN1_DROME	Q9VW09	LTN1_DROME	l(3)76BDr	E3 ubiquitin-protein ligase listerin	816897	675961	886515	697906	773490	601688
sp|Q9VW12|U389_DROME	Q9VW12	U389_DROME	CG9231	UPF0389 protein CG9231	826585	718419	900163	614979	677496	705698
sp|Q9VW14|RMTL1_DROME	Q9VW14	RMTL1_DROME	CG14100	RNA methyltransferase-like protein 1 homolog	535278	1.00436e+06	531145	956828	432028	961413
sp|Q9VW26|OAT_DROME	Q9VW26	OAT_DROME	Oat	Ornithine aminotransferase, mitochondrial	693050	720648	407402	1.36246e+06	311189	941380
sp|Q9VW43|CP305_DROME	Q9VW43	CP305_DROME	Cyp305a1	Probable cytochrome P450 305a1	354466	1.12973e+06	411081	918636	346401	1.22038e+06
sp|Q9VW47|MED12_DROME	Q9VW47	MED12_DROME	kto	Mediator of RNA polymerase II transcription subunit 12	578896	710726	663286	671226	1.05149e+06	724901
sp|Q9VW71|FAT2_DROME	Q9VW71	FAT2_DROME	kug	Fat-like cadherin-related tumor suppressor homolog	535508	778826	543111	865072	838666	839688
sp|Q9VWA2|DCTD_DROME	Q9VWA2	DCTD_DROME	CG6951	Probable deoxycytidylate deaminase	550196	914126	550870	877856	512514	999525
sp|Q9VWB0|TECPR_DROME	Q9VWB0	TECPR_DROME	Pex23	Tectonin beta-propeller repeat-containing protein	761369	600481	750318	642266	956780	703801
sp|Q9VWD4|Y4230_DROME	Q9VWD4	Y4230_DROME	CG14230	Probable RNA-binding protein CG14230	728632	550270	810961	680947	721906	905459
sp|Q9VWE0|DOME_DROME	Q9VWE0	DOME_DROME	dome	Cytokine receptor	651312	750566	624241	680078	963817	738975
sp|Q9VWE6|ELYS_DROME	Q9VWE6	ELYS_DROME	CG14215	Protein ELYS homolog	751650	762223	648091	696435	796083	767523
sp|Q9VWK6|PGP2L_DROME	Q9VWK6	PGP2L_DROME	CG7990	Post-GPI attachment to proteins factor 2-like	488497	993768	449110	869084	733851	873660
sp|Q9VWN5|F188A_DROME	Q9VWN5	F188A_DROME	CG7332	Protein FAM188A homolog	750079	802312	739675	731769	667680	746359
sp|Q9VWP4|SUOX_DROME	Q9VWP4	SUOX_DROME	CG7280	Probable sulfite oxidase, mitochondrial	1.18414e+06	704893	457595	885561	426532	802749
sp|Q9VWR5|CP306_DROME	Q9VWR5	CP306_DROME	phm	Cytochrome P450 306a1	767213	1.5245e+06	336229	309827	976747	546911
sp|Q9VWR8|DPY19_DROME	Q9VWR8	DPY19_DROME	CG6659	C-mannosyltransferase dpy-19 homolog	636416	1.00154e+06	488315	867631	546541	886240
sp|Q9VWU1|PSH_DROME	Q9VWU1	PSH_DROME	psh	Serine protease persephone	755430	419347	1.02265e+06	617320	1.09957e+06	515922
sp|Q9VWV8|NOSIP_DROME	Q9VWV8	NOSIP_DROME	CG6179	Nitric oxide synthase-interacting protein homolog	717230	681931	801894	616791	851709	747332
sp|Q9VWW0|CREBB_DROME	Q9VWW0	CREBB_DROME	CrebB	Cyclic AMP response element-binding protein B	727816	464959	1.00704e+06	643603	883927	691453
sp|Q9VWY6|TAF8_DROME	Q9VWY6	TAF8_DROME	Taf8	Transcription initiation factor TFIID subunit 8	716781	633610	774348	702472	928051	668276
sp|Q9VX09|ARP8_DROME	Q9VX09	ARP8_DROME	Arp8	Actin-related protein 8	630342	814065	718835	749371	903117	620454
sp|Q9VX25|UBE2S_DROME	Q9VX25	UBE2S_DROME	CG8188	Ubiquitin-conjugating enzyme E2 S	604765	734374	690593	762138	973642	655808
sp|Q9VXA8|DXO_DROME	Q9VXA8	DXO_DROME	CG9125	Decapping nuclease DXO homolog	657102	810126	634735	750443	690785	868926
sp|Q9VXB5|RM22_DROME	Q9VXB5	RM22_DROME	mRpL22	39S ribosomal protein L22, mitochondrial	868622	736625	765034	698702	646746	728795
sp|Q9VXE0|RUXG_DROME	Q9VXE0	RUXG_DROME	SmG	Probable small nuclear ribonucleoprotein G	709371	780342	623606	720354	816178	769430
sp|Q9VXE5|PAKM_DROME	Q9VXE5	PAKM_DROME	mbt	Serine/threonine-protein kinase PAK mbt	663708	616827	705480	673881	1.05104e+06	695110
sp|Q9VXG1|HANG_DROME	Q9VXG1	HANG_DROME	hang	Zinc finger protein hangover	615152	646173	642589	674621	1.13245e+06	688485
sp|Q9VXG4|ANX11_DROME	Q9VXG4	ANX11_DROME	AnxB11	Annexin B11	496353	1.06695e+06	579316	856250	563553	863767
sp|Q9VXH9|WASH7_DROME	Q9VXH9	WASH7_DROME	CG13957	WASH complex subunit 7 homolog	715827	723723	821236	781849	731712	668789
sp|Q9VXJ0|DHB4_DROME	Q9VXJ0	DHB4_DROME	Mfe2	Peroxisomal multifunctional enzyme type 2	718440	768743	788116	836280	537735	790953
sp|Q9VXK0|NIPSN_DROME	Q9VXK0	NIPSN_DROME	Nipsnap	Protein NipSnap	1.0497e+06	551981	972631	607938	685957	596163
sp|Q9VXK6|IF5_DROME	Q9VXK6	IF5_DROME	eIF5	Eukaryotic translation initiation factor 5	981122	606975	890166	656728	696573	626332
sp|Q9VXN0|GTDC1_DROME	Q9VXN0	GTDC1_DROME	CG15914	Glycosyltransferase-like domain-containing protein 1-like	706353	738583	630233	846577	562630	928883
sp|Q9VXN4|SYRC_DROME	Q9VXN4	SYRC_DROME	Aats-arg	Probable arginine--tRNA ligase, cytoplasmic	972941	825725	772723	423799	693993	750763
sp|Q9VXP4|PA1B2_DROME	Q9VXP4	PA1B2_DROME	Paf-AHalpha	Platelet-activating factor acetylhydrolase IB subunit beta homolog	711625	612992	700994	897448	857583	652611
sp|Q9VXT2|DJC25_DROME	Q9VXT2	DJC25_DROME	CG7872	DnaJ homolog subfamily C member 25 homolog	747602	895773	631369	642788	737644	773584
sp|Q9VXT5|C19L2_DROME	Q9VXT5	C19L2_DROME	CG9213	CWF19-like protein 2 homolog	575014	774302	701388	719811	787422	846074
sp|Q9VXT7|ASGL1_DROME	Q9VXT7	ASGL1_DROME	CG7860	Probable isoaspartyl peptidase/L-asparaginase CG7860	774572	867078	501059	854794	530642	898629
sp|Q9VXY0|CP4S3_DROME	Q9VXY0	CP4S3_DROME	Cyp4s3	Probable cytochrome P450 4s3	1.10498e+06	335359	1.25613e+06	517086	804696	455686
sp|Q9VXY4|TMA16_DROME	Q9VXY4	TMA16_DROME	CG15027	Translation machinery-associated protein 16 homolog	618898	609743	904334	689823	746737	836508
sp|Q9VY28|RT25_DROME	Q9VY28	RT25_DROME	mRpS25	Probable 28S ribosomal protein S25, mitochondrial	805047	779588	795771	487413	653933	891305
sp|Q9VYA0|NADE_DROME	Q9VYA0	NADE_DROME	CG9940	Probable glutamine-dependent NAD(+) synthetase	853842	682098	837574	631405	727654	706458
sp|Q9VYA7|RRP12_DROME	Q9VYA7	RRP12_DROME	CG2691	RRP12-like protein	646504	782250	743436	754766	678282	816053
sp|Q9VYB0|BTHD_DROME	Q9VYB0	BTHD_DROME	BthD	Selenoprotein BthD	371780	993428	417137	1.05588e+06	491307	1.06408e+06
sp|Q9VYD7|TIM9_DROME	Q9VYD7	TIM9_DROME	Tim9a	Mitochondrial import inner membrane translocase subunit Tim9	933589	488112	661165	812591	607071	910672
sp|Q9VYF8|COQ5_DROME	Q9VYF8	COQ5_DROME	coq5	2-methoxy-6-polyprenyl-1,4-benzoquinol methylase, mitochondrial	763204	849008	636379	889627	484865	820543
sp|Q9VYG1|PSMD5_DROME	Q9VYG1	PSMD5_DROME	CG12096	26S proteasome non-ATPase regulatory subunit 5	810871	717994	906395	589259	850818	575070
sp|Q9VYG2|BAP60_DROME	Q9VYG2	BAP60_DROME	Bap60	Brahma-associated protein of 60 kDa	655808	694945	627766	712035	1.01776e+06	701546
sp|Q9VYH3|PEPE_DROME	Q9VYH3	PEPE_DROME	CG2200	Probable alpha-aspartyl dipeptidase	637659	843433	639762	818481	609663	870565
sp|Q9VYQ5|CP318_DROME	Q9VYQ5	CP318_DROME	Cyp318a1	Probable cytochrome P450 318a1	519799	558816	1.12112e+06	638534	942645	637822
sp|Q9VYQ7|CP311_DROME	Q9VYQ7	CP311_DROME	Cyp311a1	Probable cytochrome P450 311a1	1.07263e+06	474653	681292	711694	969450	539907
sp|Q9VYQ8|UBP7_DROME	Q9VYQ8	UBP7_DROME	Usp7	Ubiquitin carboxyl-terminal hydrolase 7	760118	711274	837013	675378	808376	648183
sp|Q9VYR0|LS12A_DROME	Q9VYR0	LS12A_DROME	CG15735	Protein LSM12 homolog A	722072	661616	855673	687640	831601	673074
sp|Q9VYS3|RENT1_DROME	Q9VYS3	RENT1_DROME	Upf1	Regulator of nonsense transcripts 1 homolog	767310	637677	924153	637892	772810	693682
sp|Q9VYS5|NDUF6_DROME	Q9VYS5	NDUF6_DROME	sicily	NADH dehydrogenase (ubiquinone) complex I, assembly factor 6 homolog	588947	892370	567820	921193	497089	948805
sp|Q9VYV5|FUT8_DROME	Q9VYV5	FUT8_DROME	FucT6	Alpha-(1,6)-fucosyltransferase	831624	745577	735039	665442	785615	677087
sp|Q9VYX7|PGPSA_DROME	Q9VYX7	PGPSA_DROME	PGRP-SA	Peptidoglycan-recognition protein SA	1.29844e+06	439982	676048	775550	834846	457397
sp|Q9VYY2|SPCS2_DROME	Q9VYY2	SPCS2_DROME	Spase25	Signal peptidase complex subunit 2	883802	711067	755420	693447	809064	599946
sp|Q9VYY3|UBA5_DROME	Q9VYY3	UBA5_DROME	CG1749	Ubiquitin-like modifier-activating enzyme 5	999087	625335	801221	639901	718888	665675
sp|Q9VYY9|EVI5_DROME	Q9VYY9	EVI5_DROME	Evi5	Ecotropic viral integration site 5 ortholog	723516	705613	740394	653882	822532	770558
sp|Q9VZ08|RME6_DROME	Q9VZ08	RME6_DROME	CG1657	Receptor-mediated endocytosis protein 6 homolog	677456	612717	712914	806970	815611	786191
sp|Q9VZ49|ENDOU_DROME	Q9VZ49	ENDOU_DROME	CG2145	Poly(U)-specific endoribonuclease homolog	634571	515445	899576	760273	1.1177e+06	503171
sp|Q9VZ64|6PGL_DROME	Q9VZ64	6PGL_DROME	CG17333	Probable 6-phosphogluconolactonase	1.06749e+06	553023	1.01328e+06	607249	653591	576482
sp|Q9VZD8|THUM1_DROME	Q9VZD8	THUM1_DROME	CG15014	THUMP domain-containing protein 1 homolog	805517	701021	928011	643919	755733	616938
sp|Q9VZE6|BRX1_DROME	Q9VZE6	BRX1_DROME	CG11583	Ribosome biogenesis protein BRX1 homolog	610177	817318	783712	732259	695577	785575
sp|Q9VZE7|CTLH1_DROME	Q9VZE7	CTLH1_DROME	CG1311	CTL-like protein 1	318728	1.0788e+06	425434	995299	630713	952061
sp|Q9VZF4|FBXW7_DROME	Q9VZF4	FBXW7_DROME	ago	F-box/WD repeat-containing protein 7	688774	637116	834888	727042	906006	636481
sp|Q9VZH1|CU059_DROME	Q9VZH1	CU059_DROME	CG18675	UPF0769 protein CG18675	724723	590554	1.21893e+06	633442	911142	392371
sp|Q9VZI3|UN112_DROME	Q9VZI3	UN112_DROME	Fit1	Unc-112-related protein	758109	716155	825185	740575	734445	669173
sp|Q9VZM5|PIGB_DROME	Q9VZM5	PIGB_DROME	CG12006	GPI mannosyltransferase 3	706735	702443	688379	751406	969427	613039
sp|Q9VZS3|SUI1_DROME	Q9VZS3	SUI1_DROME	CG17737	Protein translation factor SUI1 homolog	902518	547019	852162	761870	652438	725393
sp|Q9VZS6|NSMA_DROME	Q9VZS6	NSMA_DROME	CG12034	Putative neutral sphingomyelinase	796803	861527	569965	838864	586784	787649
sp|Q9VZV5|CYHR1_DROME	Q9VZV5	CYHR1_DROME	CG32486	Cysteine and histidine-rich protein 1 homolog	518142	819316	738307	754349	851190	735928
sp|Q9VZZ4|PXDN_DROME	Q9VZZ4	PXDN_DROME	Pxn	Peroxidasin	883378	761743	511253	836218	758634	692391
sp|Q9VZZ9|DOS_DROME	Q9VZZ9	DOS_DROME	dos	Protein daughter of sevenless	623677	370388	1.03588e+06	515747	1.08767e+06	750928
sp|Q9W011|C4D20_DROME	Q9W011	C4D20_DROME	Cyp4d20	Probable cytochrome P450 4d20	870255	505811	1.01371e+06	783009	716269	571563
sp|Q9W020|NOM1_DROME	Q9W020	NOM1_DROME	CG9004	Nucleolar MIF4G domain-containing protein 1 homolog	674539	837678	681502	758015	725550	753193
sp|Q9W032|SGT1_DROME	Q9W032	SGT1_DROME	ecd	Protein SGT1 homolog ecdysoneless	775943	710992	719985	751635	766878	709094
sp|Q9W088|DPOD2_DROME	Q9W088	DPOD2_DROME	CG12018	DNA polymerase delta small subunit	583812	865924	701631	794663	690140	789227
sp|Q9W0C7|OPI10_DROME	Q9W0C7	OPI10_DROME	CG13926	Protein OPI10 homolog	674104	787082	721022	822577	642749	783933
sp|Q9W0G1|PTP61_DROME	Q9W0G1	PTP61_DROME	Ptp61F	Tyrosine-protein phosphatase non-receptor type 61F	697013	891244	648737	613153	761378	807377
sp|Q9W0P3|MED30_DROME	Q9W0P3	MED30_DROME	MED30	Mediator of RNA polymerase II transcription subunit 30	626769	812866	731250	734504	816194	706811
sp|Q9W0P8|MED14_DROME	Q9W0P8	MED14_DROME	MED14	Mediator of RNA polymerase II transcription subunit 14	662740	722014	734504	700942	896721	703687
sp|Q9W0R6|MTH9_DROME	Q9W0R6	MTH9_DROME	mthl9	Probable G-protein coupled receptor Mth-like 9	554606	746430	724358	791900	1.00991e+06	599678
sp|Q9W0T5|PYX_DROME	Q9W0T5	PYX_DROME	pyx	Transient receptor potential channel pyrexia	647827	888573	548869	975821	526463	846170
sp|Q9W0Y1|TINA1_DROME	Q9W0Y1	TINA1_DROME	Tina-1	Troponin C-akin-1 protein	853124	842159	485860	751544	519733	964832
sp|Q9W0Y6|PAIN_DROME	Q9W0Y6	PAIN_DROME	pain	Transient receptor potential cation channel protein painless	746041	779301	760189	797314	675914	688293
sp|Q9W107|SYYM_DROME	Q9W107	SYYM_DROME	CG16912	Probable tyrosine--tRNA ligase, mitochondrial	909054	804950	697883	618364	632506	777007
sp|Q9W123|POF_DROME	Q9W123	POF_DROME	Pof	Protein painting of fourth	700312	704418	1.0203e+06	615493	831284	576360
sp|Q9W130|CP9C1_DROME	Q9W130	CP9C1_DROME	Cyp9c1	Cytochrome P450 9c1	671414	849610	639138	734998	793025	739006
sp|Q9W141|ATPK_DROME	Q9W141	ATPK_DROME	CG4692	Putative ATP synthase subunit f, mitochondrial	846703	711498	728401	745853	620427	783498
sp|Q9W197|5NT3B_DROME	Q9W197	5NT3B_DROME	CG3362	7-methylguanosine phosphate-specific 5'-nucleotidase	876727	683956	671495	699921	661225	831203
sp|Q9W1A2|NAA35_DROME	Q9W1A2	NAA35_DROME	CG4065	N-alpha-acetyltransferase, 35 NatC auxiliary subunit homolog	784518	702998	875786	719152	729052	638256
sp|Q9W1B0|GEK_DROME	Q9W1B0	GEK_DROME	gek	Serine/threonine-protein kinase Genghis Khan	746173	717555	820294	690295	807510	656924
sp|Q9W1C9|PEB3_DROME	Q9W1C9	PEB3_DROME	PebIII	Ejaculatory bulb-specific protein 3	403704	548429	1.05597e+06	763331	692582	923722
sp|Q9W1F4|THOC5_DROME	Q9W1F4	THOC5_DROME	thoc5	THO complex subunit 5	739516	749049	685326	658437	839112	749034
sp|Q9W1G0|TALDO_DROME	Q9W1G0	TALDO_DROME	Tal	Probable transaldolase	1.1342e+06	444362	1.15365e+06	557507	716402	475934
sp|Q9W1H4|DNLI1_DROME	Q9W1H4	DNLI1_DROME	DNA-ligI	DNA ligase 1	630223	654679	738174	718403	735194	918044
sp|Q9W1I2|BGCN_DROME	Q9W1I2	BGCN_DROME	bgcn	Benign gonial cell neoplasm protein	681242	861849	932108	752141	621663	614967
sp|Q9W1J3|GAD1_DROME	Q9W1J3	GAD1_DROME	CG5543	Gastrulation defective protein 1 homolog	749282	739227	787397	644571	838671	674220
sp|Q9W1K0|U136_DROME	Q9W1K0	U136_DROME	CG5532	UPF0136 membrane protein CG5532	729104	749077	773748	827808	728001	641847
sp|Q9W1K5|SESN_DROME	Q9W1K5	SESN_DROME	Sesn	Sestrin homolog	1.08135e+06	725324	696674	705663	576951	679607
sp|Q9W1R5|VIR_DROME	Q9W1R5	VIR_DROME	vir	Protein virilizer	652354	734990	625710	726902	926697	744573
sp|Q9W1V1|ANM7_DROME	Q9W1V1	ANM7_DROME	Art7	Protein arginine N-methyltransferase 7	735996	681389	661466	822282	691829	826289
sp|Q9W1V3|FBRL_DROME	Q9W1V3	FBRL_DROME	Fib	rRNA 2'-O-methyltransferase fibrillarin	779328	703861	749959	712185	714565	768417
sp|Q9W1V6|PRPD3_DROME	Q9W1V6	PRPD3_DROME	proPO59	Diphenoloxidase subunit A3	240200	1.88449e+06	241327	1.13021e+06	222966	767730
sp|Q9W1W9|PADC1_DROME	Q9W1W9	PADC1_DROME	CG9849	PRADC1-like protein	562879	436768	574503	1.42097e+06	528746	891408
sp|Q9W1X4|NU214_DROME	Q9W1X4	NU214_DROME	Nup214	Nuclear pore complex protein Nup214	647786	792961	720567	731932	786165	745073
sp|Q9W1X8|FCL_DROME	Q9W1X8	FCL_DROME	Gmer	Probable GDP-L-fucose synthase	817361	726926	813780	707928	662563	715157
sp|Q9W1X9|OCAD1_DROME	Q9W1X9	OCAD1_DROME	asrij	OCIA domain-containing protein 1	855132	742163	830539	718572	644274	664960
sp|Q9W1Y1|EMC89_DROME	Q9W1Y1	EMC89_DROME	CG3501	ER membrane protein complex subunit 8/9 homolog	840462	818156	575462	860125	544193	804402
sp|Q9W223|CP6D2_DROME	Q9W223	CP6D2_DROME	Cyp6d2	Probable cytochrome P450 6d2	319787	1.24198e+06	393694	956564	362408	1.12368e+06
sp|Q9W237|RS16_DROME	Q9W237	RS16_DROME	RpS16	40S ribosomal protein S16	991128	619464	897235	657352	738270	562560
sp|Q9W252|RAD50_DROME	Q9W252	RAD50_DROME	rad50	DNA repair protein RAD50	244806	1.27878e+06	338138	1.01268e+06	375984	1.14238e+06
sp|Q9W261|RTF1_DROME	Q9W261	RTF1_DROME	Rtf1	RNA polymerase-associated protein Rtf1	673234	712637	723971	688350	888329	730207
sp|Q9W265|HOT_DROME	Q9W265	HOT_DROME	T3dh	Probable hydroxyacid-oxoacid transhydrogenase, mitochondrial	1.02096e+06	466776	1.07138e+06	659921	695887	553341
sp|Q9W278|MED16_DROME	Q9W278	MED16_DROME	MED16	Mediator of RNA polymerase II transcription subunit 16	736611	605700	712388	704568	1.00038e+06	659234
sp|Q9W2D6|TIM10_DROME	Q9W2D6	TIM10_DROME	Tim10	Mitochondrial import inner membrane translocase subunit Tim10	870056	422188	793838	763266	639479	916446
sp|Q9W2D9|EIF3K_DROME	Q9W2D9	EIF3K_DROME	CG10306	Eukaryotic translation initiation factor 3 subunit K	826672	624791	867083	688686	767634	665918
sp|Q9W2F2|DCAF1_DROME	Q9W2F2	DCAF1_DROME	mahj	Protein mahjong	708389	652776	900835	547746	892673	714937
sp|Q9W2N0|CAPZA_DROME	Q9W2N0	CAPZA_DROME	cpa	F-actin-capping protein subunit alpha	661626	948829	647164	852372	672099	670484
sp|Q9W2U4|PP4R2_DROME	Q9W2U4	PP4R2_DROME	PPP4R2r	Serine/threonine-protein phosphatase 4 regulatory subunit 2	513081	899488	525010	772936	806764	880781
sp|Q9W2Y3|NNRE_DROME	Q9W2Y3	NNRE_DROME	CG2974	NAD(P)H-hydrate epimerase	808838	615763	843071	774145	670789	725988
sp|Q9W303|IDGF4_DROME	Q9W303	IDGF4_DROME	Idgf4	Chitinase-like protein Idgf4	620571	790697	793265	803043	859081	579841
sp|Q9W328|LST8_DROME	Q9W328	LST8_DROME	Lst8	Protein LST8 homolog	567870	821552	718003	716874	788706	799838
sp|Q9W334|RS28_DROME	Q9W334	RS28_DROME	RpS28b	40S ribosomal protein S28	957212	447350	898799	646110	770714	711699
sp|Q9W358|RIC8_DROME	Q9W358	RIC8_DROME	ric8a	Synembryn	731359	721305	791200	697713	727882	758256
sp|Q9W376|NEUFC_DROME	Q9W376	NEUFC_DROME	CG12056	Neuferricin homolog	687372	822773	661302	787797	744782	729242
sp|Q9W385|FRDA_DROME	Q9W385	FRDA_DROME	fh	Frataxin homolog, mitochondrial	804725	774544	744037	792899	677046	660272
sp|Q9W3C1|U202_DROME	Q9W3C1	U202_DROME	l(1)G0020	Polycomb protein l(1)G0020	634791	872577	633787	805729	627665	847935
sp|Q9W3C2|GSCR2_DROME	Q9W3C2	GSCR2_DROME	CG1785	Uncharacterized protein CG1785	664686	654334	937192	652501	823941	693760
sp|Q9W3C7|PPT1_DROME	Q9W3C7	PPT1_DROME	Ppt1	Palmitoyl-protein thioesterase 1	668532	797362	683764	882015	718851	691104
sp|Q9W3J5|SYFA_DROME	Q9W3J5	SYFA_DROME	CG2263	Probable phenylalanine--tRNA ligase alpha subunit	978926	707462	753686	690711	652419	673172
sp|Q9W3L5|DM7A_DROME	Q9W3L5	DM7A_DROME	CG15333	DM7 family protein CG15333	721779	656421	998991	639177	820995	606195
sp|Q9W3R7|ATG5_DROME	Q9W3R7	ATG5_DROME	Atg5	Autophagy protein 5	797588	771364	733048	625528	795529	710015
sp|Q9W3V8|ALG8_DROME	Q9W3V8	ALG8_DROME	CG4542	Probable dolichyl pyrophosphate Glc1Man9GlcNAc2 alpha-1,3-glucosyltransferase	599236	776844	817537	669174	688364	859386
sp|Q9W3W8|RL17_DROME	Q9W3W8	RL17_DROME	RpL17	60S ribosomal protein L17	1.04007e+06	675212	748691	667587	579203	741059
sp|Q9W3Y0|ZN593_DROME	Q9W3Y0	ZN593_DROME	CG3224	Zinc finger protein 593 homolog	708108	591440	942516	646033	889342	650589
sp|Q9W401|CISY_DROME	Q9W401	CISY_DROME	kdn	Probable citrate synthase, mitochondrial	851764	820696	769006	767289	539013	711182
sp|Q9W415|WUHO_DROME	Q9W415	WUHO_DROME	wuho	tRNA (guanine-N(7)-)-methyltransferase non-catalytic subunit wuho	822534	677422	946297	633973	758835	612444
sp|Q9W420|SPT6H_DROME	Q9W420	SPT6H_DROME	Spt6	Transcription elongation factor SPT6	628645	746434	726586	716694	903445	698753
sp|Q9W422|JOSL_DROME	Q9W422	JOSL_DROME	CG3781	Josephin-like protein	1.02492e+06	796798	577761	475573	588925	951615
sp|Q9W440|THEM6_DROME	Q9W440	THEM6_DROME	CG4666	Protein THEM6	347159	1.15206e+06	448041	1.27466e+06	583205	656274
sp|Q9W495|PGAP1_DROME	Q9W495	PGAP1_DROME	CG3160	GPI inositol-deacylase	842345	663547	645992	740908	862973	676957
sp|Q9W4C5|NAAT1_DROME	Q9W4C5	NAAT1_DROME	NAAT1	Sodium-dependent nutrient amino acid transporter 1	706748	738301	666174	646945	1.02926e+06	635106
sp|Q9W4J5|NEP1_DROME	Q9W4J5	NEP1_DROME	CG3527	Ribosomal RNA small subunit methyltransferase NEP1	618022	878052	699657	800728	608456	823056
sp|Q9W4M9|NSUN2_DROME	Q9W4M9	NSUN2_DROME	Nsun2	tRNA (cytosine(34)-C(5))-methyltransferase	936540	567937	907652	584558	817868	629418
sp|Q9W4N2|MTR1_DROME	Q9W4N2	MTR1_DROME	CG6379	Cap-specific mRNA (nucleoside-2'-O-)-methyltransferase 1	676346	739186	790076	704182	899457	625532
sp|Q9W4P5|VA0D1_DROME	Q9W4P5	VA0D1_DROME	VhaAC39-1	V-type proton ATPase subunit d 1	698273	862405	541970	902915	587467	837338
sp|Q9W4V8|TI50C_DROME	Q9W4V8	TI50C_DROME	ttm50	Mitochondrial import inner membrane translocase subunit TIM50-C	764117	875404	596939	892579	518695	797694
sp|Q9W4X7|EI3G1_DROME	Q9W4X7	EI3G1_DROME	eIF3-S4-1	Eukaryotic translation initiation factor 3 subunit G-1	848035	616874	836544	661297	783894	689012
sp|Q9W4X9|ZW10_DROME	Q9W4X9	ZW10_DROME	mit(1)15	Centromere/kinetochore protein zw10	692530	831775	674220	753323	733042	746494
sp|Q9W517|WAPL_DROME	Q9W517	WAPL_DROME	wapl	Protein wings apart-like	627931	733867	738948	655703	1.00347e+06	658245
sp|Q9W552|VPS26_DROME	Q9W552	VPS26_DROME	Vps26	Vacuolar protein sorting-associated protein 26	799341	729808	854134	675491	780473	611537
sp|Q9W589|OFUT2_DROME	Q9W589	OFUT2_DROME	O-fut2	GDP-fucose protein O-fucosyltransferase 2	671778	858770	598456	858246	528061	906784
sp|Q9W590|LSG1_DROME	Q9W590	LSG1_DROME	Ns3	Large subunit GTPase 1 homolog	802866	714542	728862	748468	702071	738999
sp|Q9W5N0|COA7_DROME	Q9W5N0	COA7_DROME	CG13865	Cytochrome c oxidase assembly factor 7 homolog	834498	697298	760929	746023	711979	692773
sp|Q9W5N2|RL38_DROME	Q9W5N2	RL38_DROME	RpL38	60S ribosomal protein L38	1.06175e+06	242663	1.1239e+06	273866	976433	727819
sp|Q9W5R8|RL5_DROME	Q9W5R8	RL5_DROME	RpL5	60S ribosomal protein L5	910177	697853	778767	652896	698902	705459
sp|Q9XTM1|EXOC5_DROME	Q9XTM1	EXOC5_DROME	sec10	Exocyst complex component 5	686803	757098	782919	727474	718909	755498
sp|Q9XY35|QCR9_DROME	Q9XY35	QCR9_DROME	ox	Cytochrome b-c1 complex subunit 9	934736	747933	852490	771179	610832	562225
sp|Q9XYF4|ICENC_DROME	Q9XYF4	ICENC_DROME	Nc	Caspase Nc	705236	768991	671796	838938	767614	685880
sp|Q9XYM0|CRK_DROME	Q9XYM0	CRK_DROME	Crk	Adapter molecule Crk	821849	711436	762487	692982	738531	710403
sp|Q9XYN7|PSB3_DROME	Q9XYN7	PSB3_DROME	Prosbeta3	Proteasome subunit beta type-3	840636	718950	868549	736332	658925	635228
sp|Q9XYP8|GCP3_DROME	Q9XYP8	GCP3_DROME	l(1)dd4	Gamma-tubulin complex component 3 homolog	460117	895472	583827	889102	707495	871338
sp|Q9XYQ2|UN119_DROME	Q9XYQ2	UN119_DROME	unc-119	Protein unc-119 homolog	847746	758111	687518	907613	579446	679962
sp|Q9XYU0|MCM7_DROME	Q9XYU0	MCM7_DROME	Mcm7	DNA replication licensing factor Mcm7	486831	783214	619861	701389	1.0114e+06	789292
sp|Q9XYU1|MCM3_DROME	Q9XYU1	MCM3_DROME	Mcm3	DNA replication licensing factor Mcm3	483949	822549	572350	764621	902120	847174
sp|Q9XYZ5|DDB1_DROME	Q9XYZ5	DDB1_DROME	pic	DNA damage-binding protein 1	642807	877499	752728	735016	665024	761005
sp|Q9XZ08|EXT3_DROME	Q9XZ08	EXT3_DROME	botv	Exostosin-3	772905	698773	715198	801939	707402	738349
sp|Q9XZ58|CSN5_DROME	Q9XZ58	CSN5_DROME	CSN5	COP9 signalosome complex subunit 5	769266	742835	801335	740480	730905	661492
sp|Q9XZ63|ARMET_DROME	Q9XZ63	ARMET_DROME	Manf	Mesencephalic astrocyte-derived neurotrophic factor homolog	1.11933e+06	585603	882364	595309	697993	587281
sp|Q9XZL8|SRA_DROME	Q9XZL8	SRA_DROME	sra	Protein sarah	493071	857062	558776	917482	498216	1.06707e+06
sp|Q9XZS3|TMA7_DROME	Q9XZS3	TMA7_DROME	CG13364	Translation machinery-associated protein 7 homolog	901604	642162	1.07363e+06	727232	718944	425977
sp|Q9XZT1|MED18_DROME	Q9XZT1	MED18_DROME	MED18	Mediator of RNA polymerase II transcription subunit 18	701374	701199	704317	681450	826147	796618
sp|Q9XZT7|TAFAB_DROME	Q9XZT7	TAFAB_DROME	Taf10b	Transcription initiation factor TFIID subunit 10b	770194	511504	888965	596147	1.01808e+06	634475
sp|Q9XZU1|XPO2_DROME	Q9XZU1	XPO2_DROME	Cas	Exportin-2	633352	883817	551091	740384	622567	970255
sp|Q9Y091|FL2D_DROME	Q9Y091	FL2D_DROME	fl(2)d	Pre-mRNA-splicing regulator female-lethal(2)D	862103	699706	857546	528748	737292	745833
sp|Q9Y0I1|EAF3_DROME	Q9Y0I1	EAF3_DROME	MRG15	NuA4 complex subunit EAF3 homolog	694733	750500	725063	728555	846230	685046
sp|Q9Y0V3|T10B_DROME	Q9Y0V3	T10B_DROME	Tim9b	Mitochondrial import inner membrane translocase subunit Tim10B	945531	711793	706454	814146	636453	647849
sp|Q9Y0Y2|PURA_DROME	Q9Y0Y2	PURA_DROME	AdSS	Adenylosuccinate synthetase	756245	909926	708041	620169	542041	889424
sp|Q9Y0Y6|NRBP_DROME	Q9Y0Y6	NRBP_DROME	Madm	Nuclear receptor-binding protein homolog	664139	804837	684695	795563	706418	772304
sp|Q9Y105|SYQ_DROME	Q9Y105	SYQ_DROME	Aats-gln	Probable glutamine--tRNA ligase	807889	763960	762529	719868	643274	743666
sp|Q9Y113|NELFB_DROME	Q9Y113	NELFB_DROME	NELF-B	Negative elongation factor B	583466	606212	677595	898555	884132	758468
sp|Q9Y117|GALT3_DROME	Q9Y117	GALT3_DROME	pgant3	Polypeptide N-acetylgalactosaminyltransferase 3	566792	905579	639642	828308	701626	784121
sp|Q9Y140|DHRS7_DROME	Q9Y140	DHRS7_DROME	CG7601	Dehydrogenase/reductase SDR family protein 7-like	789494	713265	751278	810943	707978	673706
sp|Q9Y149|MED15_DROME	Q9Y149	MED15_DROME	MED15	Mediator of RNA polymerase II transcription subunit 15	635812	613681	740046	653652	1.03549e+06	722763
sp|Q9Y1A3|TIM8_DROME	Q9Y1A3	TIM8_DROME	Tim8	Mitochondrial import inner membrane translocase subunit Tim8	932392	508035	843838	802537	579286	773539
sp|Q9Y1B2|ORC6_DROME	Q9Y1B2	ORC6_DROME	Orc6	Origin recognition complex subunit 6	458459	929374	496076	805819	827160	879037
tr|A0AQH0|A0AQH0_DROME	A0AQH0	A0AQH0_DROME	Prosbeta1	Proteasome subunit beta type	745412	800706	825433	684168	690415	697613
tr|A0T1Z4|A0T1Z4_DROME	A0T1Z4	A0T1Z4_DROME	yrt	Yurt gamma	579214	847613	696466	803348	688828	806512
tr|A1A6X2|A1A6X2_DROME	A1A6X2	A1A6X2_DROME	CG34242-RA	CG34242, isoform A	1.30041e+06	473013	974345	523214	735553	479120
tr|A1A714|A1A714_DROME	A1A714	A1A714_DROME	CG12004	CG12004, isoform C	769303	676035	924065	744622	856366	492710
tr|A1YK02|A1YK02_DROME	A1YK02	A1YK02_DROME	Nup75	Nup75	707598	780565	626584	788055	680567	836425
tr|A1Z6E6|A1Z6E6_DROME	A1Z6E6	A1Z6E6_DROME	d4	D4, isoform C	457152	644920	547955	698595	1.27313e+06	750181
tr|A1Z6F4|A1Z6F4_DROME	A1Z6F4	A1Z6F4_DROME	laccase2	CG42345, isoform E	846559	677083	1.15877e+06	574342	949488	285694
tr|A1Z6G4|A1Z6G4_DROME	A1Z6G4	A1Z6G4_DROME	CG17508-RA	CG17508	728277	726000	799301	686439	668643	814334
tr|A1Z6G6|A1Z6G6_DROME	A1Z6G6	A1Z6G6_DROME	CG1344	CG1344	837874	729068	753936	719257	719691	685043
tr|A1Z6H3|A1Z6H3_DROME	A1Z6H3	A1Z6H3_DROME	vlc	Vulcan, isoform D	854653	372584	1.02448e+06	444828	1.08498e+06	630624
tr|A1Z6H6|A1Z6H6_DROME	A1Z6H6	A1Z6H6_DROME	CG7791	CG7791	650378	926731	627854	881558	550344	802587
tr|A1Z6H7|A1Z6H7_DROME	A1Z6H7	A1Z6H7_DROME	Gp210	Gp210	602062	886255	517190	851344	678143	877746
tr|A1Z6I7|A1Z6I7_DROME	A1Z6I7	A1Z6I7_DROME	BubR1	Bub1-related kinase	335781	913447	492840	943667	667409	1.02758e+06
tr|A1Z6J2|A1Z6J2_DROME	A1Z6J2	A1Z6J2_DROME	SCAP	SCAP	674766	749091	631628	860328	679477	825288
tr|A1Z6J4|A1Z6J4_DROME	A1Z6J4	A1Z6J4_DROME	tbce	CG7861, isoform A	596050	793177	909192	658950	767329	705859
tr|A1Z6L9|A1Z6L9_DROME	A1Z6L9	A1Z6L9_DROME	Trap1	FI21274p1	792278	759509	771305	811461	561858	750678
tr|A1Z6M0|A1Z6M0_DROME	A1Z6M0	A1Z6M0_DROME	Bap170	Brahma associated protein 170kD	622167	619608	701927	678364	1.01795e+06	756942
tr|A1Z6M6|A1Z6M6_DROME	A1Z6M6	A1Z6M6_DROME	Dpit47	DNA polymerase interacting tpr containing protein of 47kD	666445	784901	694094	772927	647642	852470
tr|A1Z6M8|A1Z6M8_DROME	A1Z6M8	A1Z6M8_DROME	Hsepi	CG3194, isoform A	859723	591748	797916	670139	1.00144e+06	524408
tr|A1Z6N2|A1Z6N2_DROME	A1Z6N2	A1Z6N2_DROME	Tdc1	FI02861p	564004	916167	432663	972125	609462	917843
tr|A1Z6N5|A1Z6N5_DROME	A1Z6N5	A1Z6N5_DROME	CG3270-RA	CG3270	461592	884665	399488	1.26744e+06	383903	1.01592e+06
tr|A1Z6P3|A1Z6P3_DROME	A1Z6P3	A1Z6P3_DROME	Eb1	Eb1, isoform F	657274	729009	750260	755807	862254	674467
tr|A1Z6Q0|A1Z6Q0_DROME	A1Z6Q0	A1Z6Q0_DROME	koi	CG3287, isoform B	602902	712133	696913	809621	811729	780120
tr|A1Z6Q1|A1Z6Q1_DROME	A1Z6Q1	A1Z6Q1_DROME	koi	Klaroid	624186	1.0024e+06	565448	667432	582918	965404
tr|A1Z6R4|A1Z6R4_DROME	A1Z6R4	A1Z6R4_DROME	Spn42Dc	CG9455	1.18444e+06	531155	891591	557839	688576	611298
tr|A1Z6R8|A1Z6R8_DROME	A1Z6R8	A1Z6R8_DROME	CG3358	CG3358, isoform C	832220	697601	733431	656579	733187	773831
tr|A1Z6S6|A1Z6S6_DROME	A1Z6S6	A1Z6S6_DROME	vimar	RE54322p	550801	895601	628774	644047	864553	819869
tr|A1Z6U3|A1Z6U3_DROME	A1Z6U3	A1Z6U3_DROME	Tsp42Ek	IP01824p	1.35937e+06	341137	789163	590650	1.01768e+06	379892
tr|A1Z6U7|A1Z6U7_DROME	A1Z6U7	A1Z6U7_DROME	Tsp42Ep	Tetraspanin 42Ep	1.27509e+06	422740	724394	674008	897488	477631
tr|A1Z6V5|A1Z6V5_DROME	A1Z6V5	A1Z6V5_DROME	Spn43Ab	FI01422p	636199	773366	981240	777889	839415	460506
tr|A1Z6X0|A1Z6X0_DROME	A1Z6X0	A1Z6X0_DROME	CG12164	CG12164	377941	524026	1.38835e+06	388430	1.26959e+06	464799
tr|A1Z6X1|A1Z6X1_DROME	A1Z6X1	A1Z6X1_DROME	Dscam1	Down syndrome cell adhesion molecule, isoform D	657214	719993	513695	880696	929789	715684
tr|A1Z6X6|A1Z6X6_DROME	A1Z6X6	A1Z6X6_DROME	CG1707	CG1707	975350	657709	919655	660879	638975	613584
tr|A1Z6Z3|A1Z6Z3_DROME	A1Z6Z3	A1Z6Z3_DROME	Aldh-III	Aldehyde dehydrogenase	967170	721230	793449	679000	679771	622117
tr|A1Z6Z7|A1Z6Z7_DROME	A1Z6Z7	A1Z6Z7_DROME	CG1620	CG1620, isoform A	467166	677421	577478	586435	562015	1.44255e+06
tr|A1Z6Z8|A1Z6Z8_DROME	A1Z6Z8	A1Z6Z8_DROME	didum	Dilute class unconventional myosin, isoform C	664108	881690	623961	747444	761517	749958
tr|A1Z705|A1Z705_DROME	A1Z705	A1Z705_DROME	CG2144-RA	CG2144	677043	957421	759511	772284	668412	625925
tr|A1Z713|A1Z713_DROME	A1Z713	A1Z713_DROME	Vps13	Vacuolar protein sorting 13	708810	772247	814904	734047	658553	747765
tr|A1Z714|A1Z714_DROME	A1Z714	A1Z714_DROME	blow	Blown fuse, isoform A	584687	652691	871562	755815	826321	727584
tr|A1Z718|A1Z718_DROME	A1Z718	A1Z718_DROME	CG30492	CG30492, isoform C	1.09164e+06	418512	957655	611338	750232	622865
tr|A1Z726|A1Z726_DROME	A1Z726	A1Z726_DROME	CG30495	CG30495	1.22851e+06	590217	625212	468038	924096	610990
tr|A1Z729|A1Z729_DROME	A1Z729	A1Z729_DROME	CG2064	CG2064	562617	1.09131e+06	416760	1.01444e+06	355374	986375
tr|A1Z734|A1Z734_DROME	A1Z734	A1Z734_DROME	CG1399	CG1399, isoform B	745991	690036	728284	706446	787487	763275
tr|A1Z743|A1Z743_DROME	A1Z743	A1Z743_DROME	CG30497	CG30497, isoform A	1.06507e+06	652067	728255	597812	685091	718080
tr|A1Z757|A1Z757_DROME	A1Z757	A1Z757_DROME	phr	Photorepair, isoform B	409657	996825	476704	991775	503896	1.02173e+06
tr|A1Z768|A1Z768_DROME	A1Z768	A1Z768_DROME	rnh1	Ribonuclease H1, isoform B	677394	745857	772280	770706	674666	786070
tr|A1Z782|A1Z782_DROME	A1Z782	A1Z782_DROME	CG8726-RB	CG8726, isoform B	688796	422324	762604	658213	808874	1.02462e+06
tr|A1Z784|A1Z784_DROME	A1Z784	A1Z784_DROME	ACC	CG11198, isoform A	1.07338e+06	445494	1.24131e+06	498611	712586	503758
tr|A1Z7A6|A1Z7A6_DROME	A1Z7A6	A1Z7A6_DROME	Asap1	CG30372, isoform B	663154	717036	630639	754601	911612	736918
tr|A1Z7A8|A1Z7A8_DROME	A1Z7A8	A1Z7A8_DROME	coil	Coilin, isoform D	614360	807613	797878	819572	682575	716332
tr|A1Z7C4|A1Z7C4_DROME	A1Z7C4	A1Z7C4_DROME	LRP1	CG33087	927076	612645	688080	794548	747068	675337
tr|A1Z7E8|A1Z7E8_DROME	A1Z7E8	A1Z7E8_DROME	Mal-A4	CG8693	185025	1.6068e+06	108349	1.68326e+06	78912.5	823199
tr|A1Z7F1|A1Z7F1_DROME	A1Z7F1	A1Z7F1_DROME	Mal-A6	CG30360	1.05839e+06	794225	206646	624692	515376	1.18461e+06
tr|A1Z7F3|A1Z7F3_DROME	A1Z7F3	A1Z7F3_DROME	Mal-A8	CG8690	673507	835962	330830	1.03872e+06	418596	1.10126e+06
tr|A1Z7G2|A1Z7G2_DROME	A1Z7G2	A1Z7G2_DROME	CG14752-RA	CG14752	310270	403242	1.54185e+06	226404	1.4393e+06	470029
tr|A1Z7H2|A1Z7H2_DROME	A1Z7H2	A1Z7H2_DROME	Acsl	Lethal (2) 44DEa, isoform D	948836	765565	756301	763548	587537	645970
tr|A1Z7H7|A1Z7H7_DROME	A1Z7H7	A1Z7H7_DROME	CG8586-RA	CG8586	881294	688921	469975	1.02837e+06	578419	794153
tr|A1Z7J1|A1Z7J1_DROME	A1Z7J1	A1Z7J1_DROME	sns	Sticks and stones, isoform A	1.0268e+06	437694	757179	544349	672350	960087
tr|A1Z7J6|A1Z7J6_DROME	A1Z7J6	A1Z7J6_DROME	sec31	Sec31, isoform B	874701	659080	875129	651336	734030	653594
tr|A1Z7J7|A1Z7J7_DROME	A1Z7J7	A1Z7J7_DROME	sec31	Sec31, isoform A	904080	543952	889669	667918	687207	741910
tr|A1Z7K2|A1Z7K2_DROME	A1Z7K2	A1Z7K2_DROME	CG30349-RA	CG30349	696078	839523	696354	720942	620194	850043
tr|A1Z7K6|A1Z7K6_DROME	A1Z7K6	A1Z7K6_DROME	CG8243-RA	CG8243	793498	467919	782724	550903	982996	812755
tr|A1Z7K8|A1Z7K8_DROME	A1Z7K8	A1Z7K8_DROME	CG8235	CG8235	917707	704838	839706	652944	645955	690428
tr|A1Z7K9|A1Z7K9_DROME	A1Z7K9	A1Z7K9_DROME	CG8232	CG8232	750359	722985	703048	744917	813123	697575
tr|A1Z7L1|A1Z7L1_DROME	A1Z7L1	A1Z7L1_DROME	FANCI	CG13745	307994	1.14925e+06	304109	1.02685e+06	397062	1.19538e+06
tr|A1Z7L2|A1Z7L2_DROME	A1Z7L2	A1Z7L2_DROME	CG13748	CG13748	337818	849095	471150	1.07189e+06	621397	1.03205e+06
tr|A1Z7L8|A1Z7L8_DROME	A1Z7L8	A1Z7L8_DROME	babo	Baboon, isoform B	782570	762150	616817	852916	659501	762844
tr|A1Z7M8|A1Z7M8_DROME	A1Z7M8	A1Z7M8_DROME	Ance-4	Ance-4	872227	349699	1.02343e+06	255232	1.6892e+06	237196
tr|A1Z7N4|A1Z7N4_DROME	A1Z7N4	A1Z7N4_DROME	CG13742	CG13742	453001	863845	477760	986087	539557	1.06735e+06
tr|A1Z7N9|A1Z7N9_DROME	A1Z7N9	A1Z7N9_DROME	Vang	FI21450p1	578106	586302	730851	661867	1.23146e+06	612696
tr|A1Z7P1|A1Z7P1_DROME	A1Z7P1	A1Z7P1_DROME	Pmm45A	Phosphomannomutase 45A, isoform A	867131	766256	649194	834172	523106	804086
tr|A1Z7P3|A1Z7P3_DROME	A1Z7P3	A1Z7P3_DROME	Phax	Phosphorylated adaptor for RNA export, isoform A	816617	503877	920671	722593	788929	680613
tr|A1Z7P5|A1Z7P5_DROME	A1Z7P5	A1Z7P5_DROME	Su(var)2-10	Suppressor of variegation 2-10, isoform I	637357	730839	734683	724251	907840	687160
tr|A1Z7Q5|A1Z7Q5_DROME	A1Z7Q5	A1Z7Q5_DROME	CG18659	CG18659, isoform A	964468	246450	1.15309e+06	466196	973909	619832
tr|A1Z7Q7|A1Z7Q7_DROME	A1Z7Q7	A1Z7Q7_DROME	Hydr1	Alpha/beta hydrolase 1, isoform A	562817	1.14406e+06	558688	682311	392412	1.06782e+06
tr|A1Z7Q8|A1Z7Q8_DROME	A1Z7Q8	A1Z7Q8_DROME	alc	Alicorn	1.04057e+06	727931	665561	478091	700032	816104
tr|A1Z7R4|A1Z7R4_DROME	A1Z7R4	A1Z7R4_DROME	CG30345	CG30345	827917	775897	513713	934873	648196	743105
tr|A1Z7S0|A1Z7S0_DROME	A1Z7S0	A1Z7S0_DROME	Rme-8	Receptor mediated endocytosis 8	682981	793163	686396	814189	719688	736981
tr|A1Z7S4|A1Z7S4_DROME	A1Z7S4	A1Z7S4_DROME	CG8026	CG8026, isoform A	796327	826753	609087	1.00108e+06	443718	778841
tr|A1Z7V1|A1Z7V1_DROME	A1Z7V1	A1Z7V1_DROME	brp	Bruchpilot, isoform D	484748	404660	880503	464104	1.49354e+06	637707
tr|A1Z7V9|A1Z7V9_DROME	A1Z7V9	A1Z7V9_DROME	CG1814-RA	CG1814, isoform A	734508	808070	663649	853844	489241	881183
tr|A1Z7W1|A1Z7W1_DROME	A1Z7W1	A1Z7W1_DROME	CG1868	CG1868, isoform B	608078	858059	714923	782229	704044	762044
tr|A1Z7X7|A1Z7X7_DROME	A1Z7X7	A1Z7X7_DROME	GstT2	CG30005	909532	472741	1.10365e+06	669219	732101	571461
tr|A1Z7X8|A1Z7X8_DROME	A1Z7X8	A1Z7X8_DROME	CG12926	CG12926	1.26037e+06	448149	938409	563783	865543	408897
tr|A1Z7Z4|A1Z7Z4_DROME	A1Z7Z4	A1Z7Z4_DROME	CG1648	CG1648, isoform B	656197	437899	1.46491e+06	449536	827230	599090
tr|A1Z803|A1Z803_DROME	A1Z803	A1Z803_DROME	CG1665-RA	CG1665	876691	741640	674055	833257	560203	761895
tr|A1Z813|A1Z813_DROME	A1Z813	A1Z813_DROME	sec24	Sec24	875921	643629	838387	550327	784554	735386
tr|A1Z814|A1Z814_DROME	A1Z814	A1Z814_DROME	CG1513-RA	Oxysterol-binding protein	809017	675776	738691	704455	806624	698207
tr|A1Z830|A1Z830_DROME	A1Z830	A1Z830_DROME	CG12128	CG12128, isoform A	757852	964334	926904	291677	741040	749785
tr|A1Z833|A1Z833_DROME	A1Z833	A1Z833_DROME	CG1407	Palmitoyltransferase	669412	494723	862524	775087	833021	774125
tr|A1Z838|A1Z838_DROME	A1Z838	A1Z838_DROME	CG2292	CG2292	810233	764420	796167	679913	793656	607286
tr|A1Z840|A1Z840_DROME	A1Z840	A1Z840_DROME	cdc2rk	Cdc2-related-kinase, isoform A	761400	731450	745143	729037	816422	655904
tr|A1Z843|A1Z843_DROME	A1Z843	A1Z843_DROME	CG1371	CG1371	863414	743568	672589	786345	650925	728209
tr|A1Z847|A1Z847_DROME	A1Z847	A1Z847_DROME	CG2269	CG2269, isoform B	543899	496236	788167	473987	1.05753e+06	986632
tr|A1Z850|A1Z850_DROME	A1Z850	A1Z850_DROME	Ccs	Superoxide dismutase [Cu-Zn]	899429	702281	641125	749785	530252	902184
tr|A1Z866|A1Z866_DROME	A1Z866	A1Z866_DROME	CAP	CAP, isoform I	716862	829003	719476	757478	595583	813803
tr|A1Z869|A1Z869_DROME	A1Z869	A1Z869_DROME	CAP	CAP, isoform F	827001	689389	770080	744245	615907	788128
tr|A1Z876|A1Z876_DROME	A1Z876	A1Z876_DROME	Ndg	Nidogen/entactin, isoform B	552367	1.00826e+06	693975	838696	572230	775328
tr|A1Z893|A1Z893_DROME	A1Z893	A1Z893_DROME	CG12896-RA	CG12896	1.05145e+06	834632	444576	822199	439854	856804
tr|A1Z898|A1Z898_DROME	A1Z898	A1Z898_DROME	Caf1-105	Caf1-105	671933	829649	743044	713393	900222	585626
tr|A1Z8A4|A1Z8A4_DROME	A1Z8A4	A1Z8A4_DROME	psq	Pipsqueak, isoform A	616662	335524	737522	525059	1.41682e+06	727670
tr|A1Z8A7|A1Z8A7_DROME	A1Z8A7	A1Z8A7_DROME	CG11883	CG11883, isoform A	684210	833299	696353	719298	775950	722276
tr|A1Z8B5|A1Z8B5_DROME	A1Z8B5	A1Z8B5_DROME	CG7220-RB	CG7220, isoform B	715993	836772	606696	792477	810291	675984
tr|A1Z8C9|A1Z8C9_DROME	A1Z8C9	A1Z8C9_DROME	CG30016	CG30016	316306	1.07011e+06	326028	1.2793e+06	339363	1.07558e+06
tr|A1Z8D0|A1Z8D0_DROME	A1Z8D0	A1Z8D0_DROME	nclb	CG6751	795638	671299	879551	674761	707132	710011
tr|A1Z8D2|A1Z8D2_DROME	A1Z8D2	A1Z8D2_DROME	CG18003-RC	CG18003, isoform A	1.09456e+06	557840	792067	804240	600777	621138
tr|A1Z8F4|A1Z8F4_DROME	A1Z8F4	A1Z8F4_DROME	shn	Schnurri, isoform D	742059	308054	925857	462456	1.15426e+06	782260
tr|A1Z8F5|A1Z8F5_DROME	A1Z8F5	A1Z8F5_DROME	CG9084	CG9084	720563	772875	326773	842520	777354	952183
tr|A1Z8G7|A1Z8G7_DROME	A1Z8G7	A1Z8G7_DROME	Listericin	CG9080	704093	921200	743785	946668	693144	476818
tr|A1Z8H4|A1Z8H4_DROME	A1Z8H4	A1Z8H4_DROME	Cpr47Ec	Cuticular protein 47Ec	330367	226509	1.8359e+06	505741	1.06754e+06	457403
tr|A1Z8I0|A1Z8I0_DROME	A1Z8I0	A1Z8I0_DROME	CG9067	CG9067	752150	678962	918833	779555	766448	562572
tr|A1Z8I8|A1Z8I8_DROME	A1Z8I8	A1Z8I8_DROME	CG13211	CG42336, isoform E	1.04989e+06	518300	760493	772161	600083	745541
tr|A1Z8J7|A1Z8J7_DROME	A1Z8J7	A1Z8J7_DROME	kappaTry	KappaTry	614671	1.01416e+06	164361	1.09588e+06	538124	984806
tr|A1Z8J8|A1Z8J8_DROME	A1Z8J8	A1Z8J8_DROME	CG30025	CG30025	919071	810706	664244	348356	912024	762230
tr|A1Z8L7|A1Z8L7_DROME	A1Z8L7	A1Z8L7_DROME	CG7763	CG7763	2.03184e+06	113694	878118	165381	1.23234e+06	98842.9
tr|A1Z8L8|A1Z8L8_DROME	A1Z8L8	A1Z8L8_DROME	CG7777	CG7777, isoform A	361356	1.28494e+06	255765	1.25297e+06	537532	758714
tr|A1Z8M2|A1Z8M2_DROME	A1Z8M2	A1Z8M2_DROME	tou	Toutatis, isoform A	567878	437457	658490	554771	1.56499e+06	588422
tr|A1Z8M8|A1Z8M8_DROME	A1Z8M8	A1Z8M8_DROME	CG9003	CG9003, isoform A	774575	710716	641816	764491	741194	790010
tr|A1Z8Q0|A1Z8Q0_DROME	A1Z8Q0	A1Z8Q0_DROME	TwdlBeta	TwdlBeta	495900	611006	1.42225e+06	367198	1.11572e+06	426594
tr|A1Z8R2|A1Z8R2_DROME	A1Z8R2	A1Z8R2_DROME	CG8290	CG8290, isoform A	687650	787637	909520	610889	796714	648018
tr|A1Z8R6|A1Z8R6_DROME	A1Z8R6	A1Z8R6_DROME	CG33145	CG33145, isoform B	808914	703607	680857	623977	886470	718630
tr|A1Z8R8|A1Z8R8_DROME	A1Z8R8	A1Z8R8_DROME	rho-7	Rhomboid-7	721586	914358	575104	870609	538790	819027
tr|A1Z8S6|A1Z8S6_DROME	A1Z8S6	A1Z8S6_DROME	pds5	Pds5	640520	697245	723177	711594	999523	648136
tr|A1Z8U0|A1Z8U0_DROME	A1Z8U0	A1Z8U0_DROME	Prp8	Pre-mRNA processing factor 8	686458	793997	656258	742545	788736	755785
tr|A1Z8U4|A1Z8U4_DROME	A1Z8U4	A1Z8U4_DROME	Cct5	T-complex chaperonin 5, isoform B	596506	849663	722050	794901	710125	756154
tr|A1Z8U7|A1Z8U7_DROME	A1Z8U7	A1Z8U7_DROME	CG33964-RA	CG13175	855354	584756	723080	794807	712600	759532
tr|A1Z8U9|A1Z8U9_DROME	A1Z8U9	A1Z8U9_DROME	RpS11	Ribosomal protein S11, isoform B	901164	667020	744762	742924	632402	752949
tr|A1Z8V4|A1Z8V4_DROME	A1Z8V4	A1Z8V4_DROME	CG13169	CG13169	382797	761042	423818	846932	439447	1.46696e+06
tr|A1Z8W6|A1Z8W6_DROME	A1Z8W6	A1Z8W6_DROME	CG30046-RB	CG30046	993768	401843	820083	533238	1.31857e+06	374934
tr|A1Z8W8|A1Z8W8_DROME	A1Z8W8	A1Z8W8_DROME	garz	Gartenzwerg, isoform B	838774	680805	864649	655881	779262	628435
tr|A1Z8X3|A1Z8X3_DROME	A1Z8X3	A1Z8X3_DROME	ana3	Anastral spindle 3	741849	765136	920303	567796	899233	554349
tr|A1Z8X8|A1Z8X8_DROME	A1Z8X8	A1Z8X8_DROME	CG33012	CG33012, isoform A	686079	1.19663e+06	258378	1.30636e+06	289956	745818
tr|A1Z8Y8|A1Z8Y8_DROME	A1Z8Y8	A1Z8Y8_DROME	Cpr49Ad	Cuticular protein 49Ad	1.07857e+06	246123	800935	1.08068e+06	720596	541222
tr|A1Z8Z2|A1Z8Z2_DROME	A1Z8Z2	A1Z8Z2_DROME	Cpr49Af	Cuticular protein 49Af	522171	1.29775e+06	464013	763894	659067	738713
tr|A1Z8Z3|A1Z8Z3_DROME	A1Z8Z3	A1Z8Z3_DROME	Cpr49Ag	Cuticular protein 49Ag	616254	577315	771678	264255	608997	1.46593e+06
tr|A1Z8Z7|A1Z8Z7_DROME	A1Z8Z7	A1Z8Z7_DROME	Cpr49Ah	Cuticular protein 49Ah	277902	301792	2.13908e+06	534194	758517	441504
tr|A1Z8Z9|A1Z8Z9_DROME	A1Z8Z9	A1Z8Z9_DROME	CG8834	CG8834, isoform A	147574	118801	174206	3.47395e+06	194003	414119
tr|A1Z904|A1Z904_DROME	A1Z904	A1Z904_DROME	Dyb	Dystrobrevin	699689	529766	895715	605488	994673	685495
tr|A1Z906|A1Z906_DROME	A1Z906	A1Z906_DROME	Dyb	Dystrobrevin	451542	209239	785042	685967	1.60334e+06	619745
tr|A1Z909|A1Z909_DROME	A1Z909	A1Z909_DROME	CG8545-RA	CG8545	771632	791332	710670	747829	656567	759136
tr|A1Z910|A1Z910_DROME	A1Z910	A1Z910_DROME	CG8550	CG8550	1.54578e+06	253242	733460	443343	1.25657e+06	250043
tr|A1Z913|A1Z913_DROME	A1Z913	A1Z913_DROME	vis	Vismay, isoform B	701059	583413	1.14667e+06	665942	713910	634483
tr|A1Z920|A1Z920_DROME	A1Z920	A1Z920_DROME	fra	FI24025p1	752100	419838	789627	441087	1.22986e+06	745378
tr|A1Z933|A1Z933_DROME	A1Z933	A1Z933_DROME	CG33672-RA	CG33672	772296	334757	906425	680401	926178	778518
tr|A1Z934|A1Z934_DROME	A1Z934	A1Z934_DROME	CG8778	CG8778	727248	843295	613603	902134	499717	850072
tr|A1Z936|A1Z936_DROME	A1Z936	A1Z936_DROME	ZnT49B	CG8632, isoform A	687035	819603	678293	816646	608645	819250
tr|A1Z942|A1Z942_DROME	A1Z942	A1Z942_DROME	nemy	No extended memory, isoform E	457829	1.14046e+06	449375	1.05093e+06	332188	994821
tr|A1Z945|A1Z945_DROME	A1Z945	A1Z945_DROME	CG8771	CG8771	806045	731467	680670	775470	737416	707880
tr|A1Z971|A1Z971_DROME	A1Z971	A1Z971_DROME	CG17019	CG17019	791245	634208	856693	715288	739820	699443
tr|A1Z979|A1Z979_DROME	A1Z979	A1Z979_DROME	CG13324	CG13324	199757	731769	150659	1.77939e+06	320785	1.1969e+06
tr|A1Z987|A1Z987_DROME	A1Z987	A1Z987_DROME	Cap-G	Cap-G, isoform F	459130	735194	522662	710061	1.23423e+06	721415
tr|A1Z991|A1Z991_DROME	A1Z991	A1Z991_DROME	GLaz	Glial lazarillo	633365	835204	568758	939040	667079	786462
tr|A1Z992|A1Z992_DROME	A1Z992	A1Z992_DROME	AGBE	CG33138	975765	545001	1.07021e+06	514329	734449	614033
tr|A1Z9B8|A1Z9B8_DROME	A1Z9B8	A1Z9B8_DROME	CG4734	CG4734	649962	868433	135541	1.67905e+06	325358	805273
tr|A1Z9B9|A1Z9B9_DROME	A1Z9B9	A1Z9B9_DROME	CG17047-RA	CG17047	959989	684129	919934	359836	397285	1.08218e+06
tr|A1Z9C8|A1Z9C8_DROME	A1Z9C8	A1Z9C8_DROME	CG42321	CG42321, isoform K	809900	713045	766888	678547	773483	695034
tr|A1Z9D3|A1Z9D3_DROME	A1Z9D3	A1Z9D3_DROME	cnn	Centrosomin, isoform E	602851	729537	672862	727175	965287	713812
tr|A1Z9D7|A1Z9D7_DROME	A1Z9D7	A1Z9D7_DROME	arr	Arrow	669972	633622	626874	751634	1.12249e+06	611184
tr|A1Z9D9|A1Z9D9_DROME	A1Z9D9	A1Z9D9_DROME	bbc	Bb in a boxcar, isoform A	682601	873671	749943	718516	733883	683949
tr|A1Z9E3|A1Z9E3_DROME	A1Z9E3	A1Z9E3_DROME	EfTuM	Elongation factor Tu	858892	774284	728761	745132	593421	746566
tr|A1Z9F0|A1Z9F0_DROME	A1Z9F0	A1Z9F0_DROME	CG6145	CG6145, isoform A	995397	639533	874943	582595	759328	605077
tr|A1Z9F9|A1Z9F9_DROME	A1Z9F9	A1Z9F9_DROME	CG13335	CG13335, isoform A	817335	953472	441541	1.10363e+06	644645	526486
tr|A1Z9G2|A1Z9G2_DROME	A1Z9G2	A1Z9G2_DROME	CG6197-RA	CG6197	740348	833124	652606	685293	763091	754038
tr|A1Z9G9|A1Z9G9_DROME	A1Z9G9	A1Z9G9_DROME	CG6220	CG6220	902656	766617	930121	591030	862186	426670
tr|A1Z9I0|A1Z9I0_DROME	A1Z9I0	A1Z9I0_DROME	CG6357	CG6357	570191	693683	515198	916482	937562	770642
tr|A1Z9I5|A1Z9I5_DROME	A1Z9I5	A1Z9I5_DROME	tum	Tumbleweed	402067	788159	538501	804415	1.11614e+06	740513
tr|A1Z9I6|A1Z9I6_DROME	A1Z9I6	A1Z9I6_DROME	CG13344	CG13344	829650	506739	810476	628547	897371	740601
tr|A1Z9J0|A1Z9J0_DROME	A1Z9J0	A1Z9J0_DROME	shot	Short stop, isoform E	605701	883515	716699	862522	684597	691466
tr|A1Z9J3|A1Z9J3_DROME	A1Z9J3	A1Z9J3_DROME	shot	Short stop, isoform H	586043	894795	708778	821940	577946	838061
tr|A1Z9J6|A1Z9J6_DROME	A1Z9J6	A1Z9J6_DROME	mRpL53	Mitochondrial ribosomal protein L53	958356	652577	919676	569199	735173	620338
tr|A1Z9K0|A1Z9K0_DROME	A1Z9K0	A1Z9K0_DROME	CG6701	CG6701	845388	867121	547270	868189	534444	785900
tr|A1Z9K4|A1Z9K4_DROME	A1Z9K4	A1Z9K4_DROME	RN-tre	Tre oncogene-related protein, isoform A	570847	872114	687590	844496	661380	791248
tr|A1Z9L3|A1Z9L3_DROME	A1Z9L3	A1Z9L3_DROME	pea	FI05376p	679505	803163	614449	787463	699509	834156
tr|A1Z9L9|A1Z9L9_DROME	A1Z9L9	A1Z9L9_DROME	CG18327	CG18327	927294	592011	1.04187e+06	606799	673441	617436
tr|A1Z9M0|A1Z9M0_DROME	A1Z9M0	A1Z9M0_DROME	CG18324	CG18324, isoform B	810972	625890	1.01977e+06	656284	790925	553596
tr|A1Z9M2|A1Z9M2_DROME	A1Z9M2	A1Z9M2_DROME	CG8331	CG8331	948203	595549	969413	624918	748253	574484
tr|A1Z9M3|A1Z9M3_DROME	A1Z9M3	A1Z9M3_DROME	cg	Combgap, isoform B	789302	294167	1.01013e+06	195386	1.46405e+06	622042
tr|A1Z9M5|A1Z9M5_DROME	A1Z9M5	A1Z9M5_DROME	CG30069	CG30069	742802	682800	924849	603836	728167	745921
tr|A1Z9N0|A1Z9N0_DROME	A1Z9N0	A1Z9N0_DROME	opa1-like	Optic atrophy 1-like, isoform A	803282	788515	689844	827754	574651	761354
tr|A1Z9N6|A1Z9N6_DROME	A1Z9N6	A1Z9N6_DROME	conv	Acid labile subunit	649924	492752	877816	775141	1.19621e+06	442691
tr|A1Z9N7|A1Z9N7_DROME	A1Z9N7	A1Z9N7_DROME	Ih	I[[h]] channel, isoform E	738700	521729	1.01582e+06	682460	832403	642648
tr|A1Z9Q7|A1Z9Q7_DROME	A1Z9Q7	A1Z9Q7_DROME	CG30075-RA	CG30075	1.00303e+06	606563	817215	707592	808525	524216
tr|A1Z9R1|A1Z9R1_DROME	A1Z9R1	A1Z9R1_DROME	CG17386-RA	CG17386	311178	2.59935e+06	282463	513240	511965	334223
tr|A1Z9R6|A1Z9R6_DROME	A1Z9R6	A1Z9R6_DROME	Asx	Additional sex combs, isoform B	753503	339234	882218	457531	1.27959e+06	672325
tr|A1Z9S6|A1Z9S6_DROME	A1Z9S6	A1Z9S6_DROME	Su(var)2-HP2	Su(Var)2-HP2, isoform A	603493	435920	651641	743542	1.11175e+06	825965
tr|A1Z9W2|A1Z9W2_DROME	A1Z9W2	A1Z9W2_DROME	CG33506-RA	CG33506	667063	889384	576766	989220	493410	825090
tr|A1Z9W4|A1Z9W4_DROME	A1Z9W4	A1Z9W4_DROME	Inr-a	LD11480p	825978	743469	808720	363187	836914	828687
tr|A1Z9X0|A1Z9X0_DROME	A1Z9X0	A1Z9X0_DROME	aPKC	Atypical protein kinase C, isoform A	543322	748836	643676	791540	961883	720538
tr|A1ZA18|A1ZA18_DROME	A1ZA18	A1ZA18_DROME	Khc-73	Kinesin-73, isoform A	783482	662108	790066	729086	786594	684541
tr|A1ZA22|A1ZA22_DROME	A1ZA22	A1ZA22_DROME	eIF2B-gamma	eIF2B-gamma	839498	707666	821539	676238	714340	685150
tr|A1ZA24|A1ZA24_DROME	A1ZA24	A1ZA24_DROME	CG12963	CG12963, isoform A	632828	810113	408051	920906	434782	1.17507e+06
tr|A1ZA34|A1ZA34_DROME	A1ZA34	A1ZA34_DROME	CG30091	CG30091	1.86818e+06	171947	1.25449e+06	236730	841387	166006
tr|A1ZA51|A1ZA51_DROME	A1ZA51	A1ZA51_DROME	CG33465	CG33465	569541	1.02304e+06	571783	948540	538770	791192
tr|A1ZA52|A1ZA52_DROME	A1ZA52	A1ZA52_DROME	CG8249	CG8249	792662	784369	431902	1.10238e+06	353346	966172
tr|A1ZA67|A1ZA67_DROME	A1ZA67	A1ZA67_DROME	Strn-Mlck	Stretchin-Mlck, isoform C	254683	3.50504e+06	247449	173878	244601	192480
tr|A1ZA72|A1ZA72_DROME	A1ZA72	A1ZA72_DROME	Strn-Mlck	Stretchin-Mlck, isoform D	724552	656159	1.06972e+06	624922	736094	634420
tr|A1ZA83|A1ZA83_DROME	A1ZA83	A1ZA83_DROME	CG8397	CG8397	954512	825880	713199	653295	683216	632589
tr|A1ZA89|A1ZA89_DROME	A1ZA89	A1ZA89_DROME	Dg	Dystroglycan, isoform B	581447	839364	621113	760807	787965	820007
tr|A1ZAA5|A1ZAA5_DROME	A1ZAA5	A1ZAA5_DROME	Got1	Glutamate oxaloacetate transaminase 1, isoform B	979715	693221	675572	781752	555120	764043
tr|A1ZAA9|A1ZAA9_DROME	A1ZAA9	A1ZAA9_DROME	CG10731	CG10731	728513	738160	749773	785122	715755	719264
tr|A1ZAB1|A1ZAB1_DROME	A1ZAB1	A1ZAB1_DROME	lbk	Lambik	740055	540155	789383	582398	1.20634e+06	557882
tr|A1ZAB3|A1ZAB3_DROME	A1ZAB3	A1ZAB3_DROME	Ptp52F	FI18312p1	373033	1.18892e+06	180801	1.20923e+06	287048	1.16153e+06
tr|A1ZAC0|A1ZAC0_DROME	A1ZAC0	A1ZAC0_DROME	Tsf3	FI03676p	1.12036e+06	618309	707314	718242	635506	662438
tr|A1ZAC7|A1ZAC7_DROME	A1ZAC7	A1ZAC7_DROME	fidipidine	Fidipidine	829754	562694	900779	651955	865646	626588
tr|A1ZAE2|A1ZAE2_DROME	A1ZAE2	A1ZAE2_DROME	CG8060	CG8060	645870	857858	674457	786955	649342	812151
tr|A1ZAF5|A1ZAF5_DROME	A1ZAF5	A1ZAF5_DROME	Sema-2b	CG33960, isoform A	387435	716654	504193	766732	1.35117e+06	655632
tr|A1ZAG1|A1ZAG1_DROME	A1ZAG1	A1ZAG1_DROME	CG4398	CG4398	573078	671937	703827	1.0006e+06	658327	812750
tr|A1ZAH8|A1ZAH8_DROME	A1ZAH8	A1ZAH8_DROME	RpS15	Ribosomal protein S15, isoform B	978137	605171	870059	671833	716037	616663
tr|A1ZAJ7|A1ZAJ7_DROME	A1ZAJ7	A1ZAJ7_DROME	CG15615	CG15615	352699	1.04437e+06	985641	521543	902371	623998
tr|A1ZAJ8|A1ZAJ8_DROME	A1ZAJ8	A1ZAJ8_DROME	CG5550-RA	CG5550	270133	1.42347e+06	377933	1.31869e+06	323612	757121
tr|A1ZAK3|A1ZAK3_DROME	A1ZAK3	A1ZAK3_DROME	Dek	Dek, isoform C	690539	786621	707377	726408	792357	725244
tr|A1ZAK7|A1ZAK7_DROME	A1ZAK7	A1ZAK7_DROME	Psi	LD35640p	669746	730214	883803	676480	835739	640882
tr|A1ZAM0|A1ZAM0_DROME	A1ZAM0	A1ZAM0_DROME	CG6665	CG6665, isoform C	951248	675290	590809	767074	719212	735286
tr|A1ZAN2|A1ZAN2_DROME	A1ZAN2	A1ZAN2_DROME	Ehbp1	CG15609, isoform G	812449	478180	901253	713915	788514	729681
tr|A1ZAN6|A1ZAN6_DROME	A1ZAN6	A1ZAN6_DROME	RhoGEF2	RhoGEF2, isoform D	743493	675953	833743	708834	868041	610550
tr|A1ZAP8|A1ZAP8_DROME	A1ZAP8	A1ZAP8_DROME	CG30460	CG30460, isoform C	1.14322e+06	293030	1.05068e+06	584408	738017	639289
tr|A1ZAQ3|A1ZAQ3_DROME	A1ZAQ3	A1ZAQ3_DROME	CG30456	CG30456, isoform B	540123	848228	545696	845692	746815	877384
tr|A1ZAQ4|A1ZAQ4_DROME	A1ZAQ4	A1ZAQ4_DROME	CG15611	CG15611, isoform A	533050	935344	513145	921663	769550	753347
tr|A1ZAQ7|A1ZAQ7_DROME	A1ZAQ7	A1ZAQ7_DROME	Cda9	Chitin deacetylase-like 9	602008	777166	674423	99466.1	1.3678e+06	831740
tr|A1ZAS3|A1ZAS3_DROME	A1ZAS3	A1ZAS3_DROME	l(2)k01209	Uridine kinase	768011	686148	853627	675831	730866	719716
tr|A1ZAS8|A1ZAS8_DROME	A1ZAS8	A1ZAS8_DROME	EDTP	Egg-derived tyrosine phosphatase, isoform B	913972	579510	861211	583882	868781	631492
tr|A1ZAT2|A1ZAT2_DROME	A1ZAT2	A1ZAT2_DROME	CG10764	CG10764	659373	979535	260917	1.09207e+06	609695	831338
tr|A1ZAT5|A1ZAT5_DROME	A1ZAT5	A1ZAT5_DROME	Tes	CG6522	603935	663188	770108	695419	1.06082e+06	623560
tr|A1ZAU2|A1ZAU2_DROME	A1ZAU2	A1ZAU2_DROME	CG18431-RA	CG18431	406452	729652	602674	720979	1.22837e+06	697461
tr|A1ZAU4|A1ZAU4_DROME	A1ZAU4	A1ZAU4_DROME	CG4847-RD	CG4847, isoform D	273209	1.16005e+06	457479	1.11588e+06	702849	726119
tr|A1ZAU6|A1ZAU6_DROME	A1ZAU6	A1ZAU6_DROME	CG4853-RA	CG4853, isoform A	870715	531306	857041	667883	895096	615445
tr|A1ZAV1|A1ZAV1_DROME	A1ZAV1	A1ZAV1_DROME	CG18432	CG18432	1.73162e+06	666331	310923	999583	173904	645398
tr|A1ZAV3|A1ZAV3_DROME	A1ZAV3	A1ZAV3_DROME	MESR4	Misexpression suppressor of ras 4, isoform A	730925	672094	834469	501027	1.03489e+06	644780
tr|A1ZAW0|A1ZAW0_DROME	A1ZAW0	A1ZAW0_DROME	Dcr-2	Dicer-2	831213	734401	771986	722557	651957	730603
tr|A1ZAW6|A1ZAW6_DROME	A1ZAW6	A1ZAW6_DROME	CG30105	CG30105	306629	968731	441300	861338	869091	932628
tr|A1ZAW7|A1ZAW7_DROME	A1ZAW7	A1ZAW7_DROME	CG11423	CG11423	746605	717412	867184	836256	694246	598129
tr|A1ZAX2|A1ZAX2_DROME	A1ZAX2	A1ZAX2_DROME	CG30108	CG30108	873094	459762	750948	792660	564376	963944
tr|A1ZAX6|A1ZAX6_DROME	A1ZAX6	A1ZAX6_DROME	HPS4	CG4966, isoform B	925937	504404	879226	562165	891604	665894
tr|A1ZAY8|A1ZAY8_DROME	A1ZAY8	A1ZAY8_DROME	CG4996	CG4996	878760	662077	856180	691766	826330	544331
tr|A1ZAZ2|A1ZAZ2_DROME	A1ZAZ2	A1ZAZ2_DROME	CG6385	CG6385	937598	717788	659703	1.03571e+06	470000	656020
tr|A1ZB00|A1ZB00_DROME	A1ZB00	A1ZB00_DROME	aft	Adrift	665588	721636	720769	794207	834960	691677
tr|A1ZB17|A1ZB17_DROME	A1ZB17	A1ZB17_DROME	CG5084	CG5084	962844	411005	521985	518876	912496	1.03493e+06
tr|A1ZB21|A1ZB21_DROME	A1ZB21	A1ZB21_DROME	CG5767	CG5767	2.22806e+06	242276	162698	1.44974e+06	140496	364809
tr|A1ZB24|A1ZB24_DROME	A1ZB24	A1ZB24_DROME	Muc55B	Mucin 55B	941028	357692	125684	412871	1.78446e+06	717942
tr|A1ZB29|A1ZB29_DROME	A1ZB29	A1ZB29_DROME	CG5757	CG5757	445460	1.00169e+06	515481	919038	481268	1.03749e+06
tr|A1ZB68|A1ZB68_DROME	A1ZB68	A1ZB68_DROME	GstE3	FI01423p	714841	1.0402e+06	415719	976842	310627	977284
tr|A1ZB70|A1ZB70_DROME	A1ZB70	A1ZB70_DROME	GstE5	Glutathione S transferase E5	1.13869e+06	619087	506756	631629	730400	803097
tr|A1ZB71|A1ZB71_DROME	A1ZB71	A1ZB71_DROME	GstE6	Glutathione S transferase E6	591002	982831	267317	934149	430159	1.17919e+06
tr|A1ZB72|A1ZB72_DROME	A1ZB72	A1ZB72_DROME	GstE7	Glutathione S transferase E7	989095	748070	655330	805177	419470	833710
tr|A1ZB73|A1ZB73_DROME	A1ZB73	A1ZB73_DROME	GstE8	Glutathione S transferase E8	1.02348e+06	568505	815200	737911	561354	743760
tr|A1ZB77|A1ZB77_DROME	A1ZB77	A1ZB77_DROME	CG5174	CG5174, isoform J	781499	669707	685240	804482	726198	761411
tr|A1ZB84|A1ZB84_DROME	A1ZB84	A1ZB84_DROME	CG12263-RA	CG12263	567782	854180	489594	907646	624124	958614
tr|A1ZBA1|A1ZBA1_DROME	A1ZBA1	A1ZBA1_DROME	GEFmeso	CG30115	614098	903072	521371	882215	603707	893057
tr|A1ZBA5|A1ZBA5_DROME	A1ZBA5	A1ZBA5_DROME	mRpS28	FI07234p	826188	805975	719114	783752	522102	788801
tr|A1ZBA8|A1ZBA8_DROME	A1ZBA8	A1ZBA8_DROME	CG5493-RA	CG5493	1.17871e+06	735128	346899	1.04336e+06	269725	888218
tr|A1ZBB1|A1ZBB1_DROME	A1ZBB1	A1ZBB1_DROME	CG5335-RA	Galectin	548805	1.00668e+06	348131	875015	497526	1.11293e+06
tr|A1ZBB4|A1ZBB4_DROME	A1ZBB4	A1ZBB4_DROME	CG30122	CG30122, isoform B	629045	765907	646668	785441	827504	762554
tr|A1ZBC4|A1ZBC4_DROME	A1ZBC4	A1ZBC4_DROME	Sik3	CG18604	891262	467719	972078	570394	860155	667955
tr|A1ZBD6|A1ZBD6_DROME	A1ZBD6	A1ZBD6_DROME	Mctp	Multiple C2 domain and transmembrane region protein, isoform A	1.12019e+06	522978	892814	656596	666250	607260
tr|A1ZBD8|A1ZBD8_DROME	A1ZBD8	A1ZBD8_DROME	CG15080	CG15080	581932	1.14394e+06	1.08666e+06	440939	839273	392454
tr|A1ZBD9|A1ZBD9_DROME	A1ZBD9	A1ZBD9_DROME	MFS15	CG15094, isoform A	376264	1.05762e+06	490015	859161	536318	1.06952e+06
tr|A1ZBE9|A1ZBE9_DROME	A1ZBE9	A1ZBE9_DROME	CG15100	CG15100	750672	802376	709221	745266	661985	765647
tr|A1ZBF1|A1ZBF1_DROME	A1ZBF1	A1ZBF1_DROME	CG18190-RB	CG18190	505023	808354	845835	687038	880419	694017
tr|A1ZBG9|A1ZBG9_DROME	A1ZBG9	A1ZBG9_DROME	CG15117-RB	CG15117, isoform B	588080	852534	431395	759796	525570	1.20903e+06
tr|A1ZBH1|A1ZBH1_DROME	A1ZBH1	A1ZBH1_DROME	CG15118	CG15118, isoform D	901229	677570	697767	745018	768457	656542
tr|A1ZBH2|A1ZBH2_DROME	A1ZBH2	A1ZBH2_DROME	CG15111	CG15111, isoform A	594183	908702	566973	858392	643025	849684
tr|A1ZBH7|A1ZBH7_DROME	A1ZBH7	A1ZBH7_DROME	hppy	Happyhour, isoform A	701183	750313	714625	768608	743515	749968
tr|A1ZBI8|A1ZBI8_DROME	A1ZBI8	A1ZBI8_DROME	CG18606	CG18606	547985	764973	274438	782709	262188	1.67306e+06
tr|A1ZBI9|A1ZBI9_DROME	A1ZBI9	A1ZBI9_DROME	CG18607-RA	CG18607	699314	1.06641e+06	175534	922072	257262	1.26881e+06
tr|A1ZBJ2|A1ZBJ2_DROME	A1ZBJ2	A1ZBJ2_DROME	CG7461	CG7461	883646	609504	1.04796e+06	662765	642545	615008
tr|A1ZBJ8|A1ZBJ8_DROME	A1ZBJ8	A1ZBJ8_DROME	CG9975-RA	CG9975	684192	569997	1.36962e+06	528873	890731	421673
tr|A1ZBK1|A1ZBK1_DROME	A1ZBK1	A1ZBK1_DROME	CG10051	CG10051	359893	1.52382e+06	124637	1.03428e+06	304011	1.0742e+06
tr|A1ZBK3|A1ZBK3_DROME	A1ZBK3	A1ZBK3_DROME	CG10062	CG10062, isoform A	549148	1.11986e+06	602175	895457	513985	769464
tr|A1ZBK4|A1ZBK4_DROME	A1ZBK4	A1ZBK4_DROME	CG10073-RA	CG10073	873829	649093	1.0918e+06	615885	698269	540899
tr|A1ZBK7|A1ZBK7_DROME	A1ZBK7	A1ZBK7_DROME	cer	Crammer	821318	415284	784690	795694	917452	685585
tr|A1ZBL2|A1ZBL2_DROME	A1ZBL2	A1ZBL2_DROME	CG7744-RA	CG7744	528699	1.03137e+06	612929	784630	695965	775981
tr|A1ZBM2|A1ZBM2_DROME	A1ZBM2	A1ZBM2_DROME	TBCB	CG11242	710883	764285	749373	768738	752499	692297
tr|A1ZBN3|A1ZBN3_DROME	A1ZBN3	A1ZBN3_DROME	sm	FI03683p	715606	665176	1.23558e+06	567569	863350	423600
tr|A1ZBR1|A1ZBR1_DROME	A1ZBR1	A1ZBR1_DROME	CG16898	CG16898	266938	1.08498e+06	309239	1.32244e+06	252503	1.1622e+06
tr|A1ZBR2|A1ZBR2_DROME	A1ZBR2	A1ZBR2_DROME	18w	18 wheeler	700810	563211	816283	609029	1.10425e+06	620128
tr|A1ZBT6|A1ZBT6_DROME	A1ZBT6	A1ZBT6_DROME	CG8929	CG8929, isoform C	722209	675277	677022	612531	945707	771860
tr|A1ZBU6|A1ZBU6_DROME	A1ZBU6	A1ZBU6_DROME	CG30151	CG30151	741045	671609	774784	659830	786137	783667
tr|A1ZBU8|A1ZBU8_DROME	A1ZBU8	A1ZBU8_DROME	CG18067	CG18067	654234	484288	952111	579597	1.36694e+06	390126
tr|A1ZBU9|A1ZBU9_DROME	A1ZBU9	A1ZBU9_DROME	CG13423	CG13423	873108	922474	1.13159e+06	218141	881368	447203
tr|A1ZBW0|A1ZBW0_DROME	A1ZBW0	A1ZBW0_DROME	bl	Bancal, isoform C	728753	641407	837751	673425	832962	710390
tr|A1ZBW6|A1ZBW6_DROME	A1ZBW6	A1ZBW6_DROME	CG11180	CG11180	569550	767388	586228	898053	713885	871911
tr|A1ZBX6|A1ZBX6_DROME	A1ZBX6	A1ZBX6_DROME	CG16799	CG16799	849267	618286	732613	740079	693334	792653
tr|A1ZBX8|A1ZBX8_DROME	A1ZBX8	A1ZBX8_DROME	Lrt	CG11136	917831	604693	759383	767960	725673	671041
tr|A2RVF0|A2RVF0_DROME	A2RVF0	A2RVF0_DROME	Atet	ABC transporter expressed in trachea, isoform C	668671	901026	490956	880667	594898	885114
tr|A2VEF9|A2VEF9_DROME	A2VEF9	A2VEF9_DROME	mu2	IP15561p	855957	609305	709278	803546	691898	762175
tr|A2VEG3|A2VEG3_DROME	A2VEG3	A2VEG3_DROME	CG8671	CG8671, isoform C	786625	889203	770056	345349	800629	821707
tr|A2VEK1|A2VEK1_DROME	A2VEK1	A2VEK1_DROME	CG34213	CG34213	794781	739790	780302	733986	772776	627645
tr|A4IJ59|A4IJ59_DROME	A4IJ59	A4IJ59_DROME	mub	IP17311p	625563	725627	551398	747404	1.12021e+06	641446
tr|A4UZ51|A4UZ51_DROME	A4UZ51	A4UZ51_DROME	EcR	Ecdysone receptor, isoform E	849945	634403	897777	632840	878985	556719
tr|A4UZB1|A4UZB1_DROME	A4UZB1	A4UZB1_DROME	magu	CG2264, isoform F	1.07167e+06	554774	568351	827318	871942	562934
tr|A4UZI6|A4UZI6_DROME	A4UZI6	A4UZI6_DROME	Rho1	Rho1, isoform C	791682	721491	739628	579443	877882	713467
tr|A4UZL5|A4UZL5_DROME	A4UZL5	A4UZL5_DROME	GstS1	Glutathione S transferase S1, isoform C	727044	862897	948848	669374	698477	560902
tr|A4UZR3|A4UZR3_DROME	A4UZR3	A4UZR3_DROME	Treh	Trehalase, isoform E	548257	938752	472466	1.07424e+06	613981	787635
tr|A4UZW2|A4UZW2_DROME	A4UZW2	A4UZW2_DROME	Sam-S	S-adenosylmethionine synthase	1.13411e+06	752634	775852	751443	318900	745938
tr|A4UZX7|A4UZX7_DROME	A4UZX7	A4UZX7_DROME	crq	Croquemort, isoform B	804626	772159	612115	554660	775738	884890
tr|A4UZZ4|A4UZZ4_DROME	A4UZZ4	A4UZZ4_DROME	GlyP	Phosphorylase	617159	787748	886852	702334	613681	817500
tr|A4V013|A4V013_DROME	A4V013	A4V013_DROME	oaf	Out at first, isoform B	860259	637261	754530	767094	794196	632962
tr|A4V0B5|A4V0B5_DROME	A4V0B5	A4V0B5_DROME	nrv2	Nervana 2, isoform F	550681	667678	906460	602209	1.09555e+06	594155
tr|A4V0N4|A4V0N4_DROME	A4V0N4	A4V0N4_DROME	Vha68-2	MIP16230p	668385	860562	509126	953588	534668	897568
tr|A4V0S1|A4V0S1_DROME	A4V0S1	A4V0S1_DROME	Syx5	Syntaxin 5, isoform B	844875	707692	749700	796778	657876	692309
tr|A4V110|A4V110_DROME	A4V110	A4V110_DROME	CaMKI	Calcium/calmodulin-dependent protein kinase I, isoform I	1.11656e+06	500017	1.0643e+06	564359	749883	483674
tr|A4V164|A4V164_DROME	A4V164	A4V164_DROME	Pdk1	Phosphoinositide-dependent kinase 1, isoform F	751003	578798	997004	640586	854735	615852
tr|A4V1B2|A4V1B2_DROME	A4V1B2	A4V1B2_DROME	Patj	Patj, isoform B	651471	828194	661039	688554	779740	806133
tr|A4V1N8|A4V1N8_DROME	A4V1N8	A4V1N8_DROME	Prm	FI03688p	547798	1.27271e+06	409213	1.39792e+06	306456	575444
tr|A4V1N9|A4V1N9_DROME	A4V1N9	A4V1N9_DROME	Prm	Paramyosin, isoform D	535288	2.99971e+06	292553	396744	192217	202362
tr|A4V1P2|A4V1P2_DROME	A4V1P2	A4V1P2_DROME	orb2	Orb2, isoform B	710153	677736	1.28812e+06	598781	879988	331080
tr|A4V1Q0|A4V1Q0_DROME	A4V1Q0	A4V1Q0_DROME	bol	Boule, isoform D	342655	966548	856040	889299	970013	434017
tr|A4V1U5|A4V1U5_DROME	A4V1U5	A4V1U5_DROME	GlcAT-P	GlcAT-P, isoform C	563965	1.03386e+06	454463	820270	684564	860369
tr|A4V1Y6|A4V1Y6_DROME	A4V1Y6	A4V1Y6_DROME	Trl	Trithorax-like, isoform F	1.0535e+06	490604	545612	671792	1.02756e+06	638104
tr|A4V201|A4V201_DROME	A4V201	A4V201_DROME	Taf4	TBP-associated factor 4, isoform D	734636	679112	696412	698728	933887	679960
tr|A4V2B8|A4V2B8_DROME	A4V2B8	A4V2B8_DROME	CkIIalpha	Casein kinase IIalpha, isoform C	779094	693097	841542	729302	738127	663184
tr|A4V2F2|A4V2F2_DROME	A4V2F2	A4V2F2_DROME	mtd	L(3)82Fd, isoform U	677102	760167	653250	677960	848341	793618
tr|A4V2I0|A4V2I0_DROME	A4V2I0	A4V2I0_DROME	Ama	Amalgam, isoform C	661463	492493	564685	716584	1.25977e+06	691091
tr|A4V2J1|A4V2J1_DROME	A4V2J1	A4V2J1_DROME	Mlp84B	Muscle LIM protein at 84B, isoform B	566325	767976	489214	1.22166e+06	534350	849400
tr|A4V2J2|A4V2J2_DROME	A4V2J2	A4V2J2_DROME	alphaTub84D	Alpha-Tubulin at 84D, isoform B	641908	761202	756470	742367	736478	782851
tr|A4V2K7|A4V2K7_DROME	A4V2K7	A4V2K7_DROME	D1	D1 chromosomal protein, isoform C	680100	818193	749559	891064	660123	654834
tr|A4V2N5|A4V2N5_DROME	A4V2N5	A4V2N5_DROME	Timp	Tissue inhibitor of metalloproteases, isoform B	967409	633408	619050	808093	802711	620729
tr|A4V2P5|A4V2P5_DROME	A4V2P5	A4V2P5_DROME	PGRP-LB	Peptidoglycan recognition protein LB, isoform B	547466	986610	296120	1.23214e+06	401659	961905
tr|A4V2S3|A4V2S3_DROME	A4V2S3	A4V2S3_DROME	CtBP	C-terminal binding protein, isoform B	616729	736346	682647	745082	837113	791819
tr|A4V2Z1|A4V2Z1_DROME	A4V2Z1	A4V2Z1_DROME	wah	CG4699, isoform D	740500	563279	810630	625806	980018	692912
tr|A4V303|A4V303_DROME	A4V303	A4V303_DROME	Cctgamma	Cctgamma, isoform B	618997	866116	683674	810763	650813	798122
tr|A4V370|A4V370_DROME	A4V370	A4V370_DROME	Mvl	FI04486p	852217	778832	531967	869292	641654	766532
tr|A4V383|A4V383_DROME	A4V383	A4V383_DROME	ND42	NADH:ubiquinone reductase 42kD subunit, isoform B	949146	671723	852429	712939	630040	645158
tr|A4V391|A4V391_DROME	A4V391	A4V391_DROME	T-cp1	T-complex protein 1 subunit alpha	631146	817188	737095	771709	717468	754526
tr|A4V392|A4V392_DROME	A4V392	A4V392_DROME	AdipoR	CG5315, isoform C	864549	651951	778201	720086	741591	685442
tr|A4V3G8|A4V3G8_DROME	A4V3G8	A4V3G8_DROME	ball	Ballchen, isoform B	451454	896227	500976	835898	786530	920351
tr|A4V3G9|A4V3G9_DROME	A4V3G9	A4V3G9_DROME	Rb97D	Ribonuclear protein at 97D, isoform C	764061	727939	1.21469e+06	596045	709513	467550
tr|A4V3J5|A4V3J5_DROME	A4V3J5	A4V3J5_DROME	Hrb98DE	Heterogeneous nuclear ribonucleoprotein at 98DE, isoform C	672758	745847	910141	677569	826647	610440
tr|A4V3L3|A4V3L3_DROME	A4V3L3	A4V3L3_DROME	Trc8	Trc8, isoform B	920064	610373	744501	752976	761720	656481
tr|A4V3M5|A4V3M5_DROME	A4V3M5	A4V3M5_DROME	Axn	Axin, isoform B	725205	664545	755646	766348	741123	770543
tr|A4V3N7|A4V3N7_DROME	A4V3N7	A4V3N7_DROME	CDase	Ceramidase, isoform B	516883	909052	359042	1.17836e+06	630653	831496
tr|A4V3Q6|A4V3Q6_DROME	A4V3Q6	A4V3Q6_DROME	Ef1alpha100E	Elongation factor 1-alpha	1.10063e+06	463027	910622	525971	754948	686369
tr|A4V3W0|A4V3W0_DROME	A4V3W0	A4V3W0_DROME	egh	Egghead, isoform C	771902	684270	669439	791492	840107	676285
tr|A4V3W1|A4V3W1_DROME	A4V3W1	A4V3W1_DROME	sgg	Shaggy, isoform J	723365	759957	716994	676021	774309	771395
tr|A4V3W8|A4V3W8_DROME	A4V3W8	A4V3W8_DROME	CG32795	CG32795, isoform C	832960	762283	536457	962612	574480	775621
tr|A4V402|A4V402_DROME	A4V402	A4V402_DROME	MAPk-Ak2	LD26767p	767711	683540	717935	669492	749217	826220
tr|A4V408|A4V408_DROME	A4V408	A4V408_DROME	Efr	ER GDP-fucose transporter, isoform B	916473	845522	806077	237589	647630	952776
tr|A4V441|A4V441_DROME	A4V441	A4V441_DROME	sn	Singed, isoform B	406640	951635	499610	984830	891672	689288
tr|A4V448|A4V448_DROME	A4V448	A4V448_DROME	Gclc	Glutamate-cysteine ligase catalytic subunit, isoform B	401353	1.10298e+06	407010	949916	307853	1.2166e+06
tr|A4V449|A4V449_DROME	A4V449	A4V449_DROME	ND75	NADH:ubiquinone reductase 75kD subunit, isoform B	975760	750019	789915	733091	572562	647601
tr|A4V488|A4V488_DROME	A4V488	A4V488_DROME	ras	Inosine-5'-monophosphate dehydrogenase	808232	682948	881121	648272	674415	741264
tr|A4V4A1|A4V4A1_DROME	A4V4A1	A4V4A1_DROME	Klp10A	Klp10A, isoform B	588211	822434	628474	820968	855955	708449
tr|A4V4A5|A4V4A5_DROME	A4V4A5	A4V4A5_DROME	Ran	Ran, isoform B	802652	773863	747558	726484	660893	730631
tr|A4V4F2|A4V4F2_DROME	A4V4F2	A4V4F2_DROME	Flo-2	Flotillin-2, isoform F	644901	763273	735004	790241	768528	726842
tr|A4V4I0|A4V4I0_DROME	A4V4I0	A4V4I0_DROME	Gbeta13F	G protein beta-subunit 13F, isoform B	661871	706868	795880	745651	802318	714211
tr|A4V4I8|A4V4I8_DROME	A4V4I8	A4V4I8_DROME	shi	Shibire, isoform F	626738	846284	626041	679460	773984	854373
tr|A4V4N7|A4V4N7_DROME	A4V4N7	A4V4N7_DROME	CG4678	CG4678, isoform G	519350	781269	801447	649774	873426	780519
tr|A4V4Q7|A4V4Q7_DROME	A4V4Q7	A4V4Q7_DROME	ari-1	Ariadne, isoform C	943961	669204	880929	456005	736749	745667
tr|A4V4S5|A4V4S5_DROME	A4V4S5	A4V4S5_DROME	car	Carnation, isoform B	814741	779805	702357	767461	643485	735734
tr|A4V4T4|A4V4T4_DROME	A4V4T4	A4V4T4_DROME	sw	SD27396p	758732	678123	747291	727294	741804	771098
tr|A4V4U5|A4V4U5_DROME	A4V4U5	A4V4U5_DROME	slgA	Sluggish A, isoform F	410018	1.2284e+06	497102	821075	689892	783820
tr|A4V4V2|A4V4V2_DROME	A4V4V2	A4V4V2_DROME	DIP1	DISCO interacting protein 1, isoform B	765366	801806	675534	769167	669246	755798
tr|A4V4V8|A4V4V8_DROME	A4V4V8	A4V4V8_DROME	fog	Folded gastrulation, isoform B	477742	946723	383799	918335	694258	972323
tr|A4VCL2|A4VCL2_DROME	A4VCL2	A4VCL2_DROME	CG31145	CG31145, isoform C	1.13105e+06	507406	889332	620349	728331	587397
tr|A5XCL5|A5XCL5_DROME	A5XCL5	A5XCL5_DROME	UGP	LD36265p (Fragment)	837348	689043	982870	712845	619997	621175
tr|A8DWJ8|A8DWJ8_DROME	A8DWJ8	A8DWJ8_DROME	Nox	NADPH oxidase	1.24601e+06	339984	1.10584e+06	479803	984956	328329
tr|A8DY44|A8DY44_DROME	A8DY44	A8DY44_DROME	Nipped-A	Nipped-A, isoform D	688121	620619	743339	692372	975928	693402
tr|A8DY65|A8DY65_DROME	A8DY65	A8DY65_DROME	CG2906	CG2906	1.01838e+06	542049	938433	604559	804323	552764
tr|A8DY69|A8DY69_DROME	A8DY69	A8DY69_DROME	Lpin	CG8709, isoform B	1.01953e+06	521976	979427	647832	681878	610252
tr|A8DY78|A8DY78_DROME	A8DY78	A8DY78_DROME	Pdk	Pyruvate dehydrogenase kinase, isoform B	1.09076e+06	648633	741285	864905	457438	673506
tr|A8DY80|A8DY80_DROME	A8DY80	A8DY80_DROME	Not1	Not1, isoform D	763190	660973	814236	664676	927530	605655
tr|A8DY97|A8DY97_DROME	A8DY97	A8DY97_DROME	CG30015	CG30015, isoform C	481421	636774	490701	902114	391299	1.42969e+06
tr|A8DYB0|A8DYB0_DROME	A8DYB0	A8DYB0_DROME	CG13185	CG13185, isoform C	719857	789559	776418	718836	658221	770249
tr|A8DYC1|A8DYC1_DROME	A8DYC1	A8DYC1_DROME	CG17574	CG17574, isoform C	728607	575002	875343	745951	757228	742399
tr|A8DYE0|A8DYE0_DROME	A8DYE0	A8DYE0_DROME	CG10249-RD	CG10249, isoform D	911319	453608	1.08663e+06	563582	773324	651549
tr|A8DYF7|A8DYF7_DROME	A8DYF7	A8DYF7_DROME	mrj	Mrj, isoform E	581922	859234	774219	799633	700764	720413
tr|A8DYG9|A8DYG9_DROME	A8DYG9	A8DYG9_DROME	Pkc53E	Protein kinase C	520626	731060	638123	591898	1.01655e+06	876940
tr|A8DYI1|A8DYI1_DROME	A8DYI1	A8DYI1_DROME	CG30118	CG30118, isoform B	507196	968690	619560	897897	497028	928491
tr|A8DYI6|A8DYI6_DROME	A8DYI6	A8DYI6_DROME	l(2)03709	Lethal (2) 03709, isoform E	820704	797275	706004	746012	618345	754581
tr|A8DYJ0|A8DYJ0_DROME	A8DYJ0	A8DYJ0_DROME	endoB	Endophilin B, isoform D	661430	759128	680514	676415	923070	716324
tr|A8DYJ2|A8DYJ2_DROME	A8DYJ2	A8DYJ2_DROME	hts	CG34197	784606	707705	952942	645626	776699	586539
tr|A8DYJ3|A8DYJ3_DROME	A8DYJ3	A8DYJ3_DROME	CalpA	Calpain-A, isoform C	601381	812541	838348	808298	718940	664319
tr|A8DYK1|A8DYK1_DROME	A8DYK1	A8DYK1_DROME	Ipk1	Ipk1, isoform B	668863	869465	778492	618449	655320	831715
tr|A8DYL3|A8DYL3_DROME	A8DYL3	A8DYL3_DROME	Vrp1	Verprolin 1, isoform G	568837	349024	1.12429e+06	374645	1.21022e+06	744416
tr|A8DYP0|A8DYP0_DROME	A8DYP0	A8DYP0_DROME	Unc-89	Unc-89, isoform C	384727	2.05501e+06	341659	967876	320446	468235
tr|A8DYT1|A8DYT1_DROME	A8DYT1	A8DYT1_DROME	CG7337	CG7337, isoform D	566252	803151	741881	777544	754209	776737
tr|A8DYT6|A8DYT6_DROME	A8DYT6	A8DYT6_DROME	CG15387	CG15387	694783	637201	781201	703618	1.04568e+06	567787
tr|A8DYU1|A8DYU1_DROME	A8DYU1	A8DYU1_DROME	CG15411	CG34394, isoform D	821178	740269	675313	847925	692626	672846
tr|A8DYV5|A8DYV5_DROME	A8DYV5	A8DYV5_DROME	Ncoa6	Ncoa6, isoform F	859723	485702	787381	596370	1.05538e+06	633944
tr|A8DYW1|A8DYW1_DROME	A8DYW1	A8DYW1_DROME	CG31638	CG31638, isoform B	695439	689227	583456	721618	966729	750492
tr|A8DYW2|A8DYW2_DROME	A8DYW2	A8DYW2_DROME	CG31635	CG31635, isoform B	859432	658681	751379	636855	764003	756561
tr|A8DYW8|A8DYW8_DROME	A8DYW8	A8DYW8_DROME	RapGAP1	Rapgap1, isoform H	421982	1.09715e+06	454015	1.17256e+06	612801	693964
tr|A8DYX8|A8DYX8_DROME	A8DYX8	A8DYX8_DROME	Hnf4	Hepatocyte nuclear factor 4, isoform D	846376	671384	878138	700743	657177	693532
tr|A8DZ02|A8DZ02_DROME	A8DZ02	A8DZ02_DROME	kuz	Kuzbanian, isoform F	826405	674365	589351	757659	852467	724989
tr|A8DZ14|A8DZ14_DROME	A8DZ14	A8DZ14_DROME	Fas3	FI17828p1	381606	738694	544048	579565	1.51249e+06	617085
tr|A8DZ18|A8DZ18_DROME	A8DZ18	A8DZ18_DROME	Lar	Leukocyte-antigen-related-like, isoform B	671560	745475	659405	705103	926111	710245
tr|A8DZ20|A8DZ20_DROME	A8DZ20	A8DZ20_DROME	RtGEF	Rho-type guanine exchange factor, isoform D	708990	828794	765549	616417	767020	741786
tr|A8DZ24|A8DZ24_DROME	A8DZ24	A8DZ24_DROME	CG42748	CG42748, isoform D	550183	696004	609842	767535	810884	947637
tr|A8DZ26|A8DZ26_DROME	A8DZ26	A8DZ26_DROME	CG32000	CG32000, isoform H	832958	629843	797652	767511	715736	697133
tr|A8DZ29|A8DZ29_DROME	A8DZ29	A8DZ29_DROME	eIF4G	Eukaryotic translation initiation factor 4G, isoform B	789315	707926	836539	724011	645033	737308
tr|A8E6W0|A8E6W0_DROME	A8E6W0	A8E6W0_DROME	CG34039-RA	CG34039	773507	596660	806700	711522	790709	744005
tr|A8E702|A8E702_DROME	A8E702	A8E702_DROME	mRpL28	IP19992p	908579	728917	862714	700541	594578	665642
tr|A8JNI2|A8JNI2_DROME	A8JNI2	A8JNI2_DROME	CG7971	CG7971, isoform F	753047	654885	737712	719009	870913	690803
tr|A8JNJ2|A8JNJ2_DROME	A8JNJ2	A8JNJ2_DROME	CG11486	CG11486, isoform O	878611	626358	691917	698773	831916	703116
tr|A8JNJ6|A8JNJ6_DROME	A8JNJ6	A8JNJ6_DROME	kst	Karst, isoform E	539734	964552	531277	922107	493800	962882
tr|A8JNJ9|A8JNJ9_DROME	A8JNJ9	A8JNJ9_DROME	enc	Encore, isoform E	707097	651200	925229	664079	876917	612757
tr|A8JNK1|A8JNK1_DROME	A8JNK1	A8JNK1_DROME	ens	Ensconsin, isoform F	694972	480608	1.03185e+06	654122	779772	771883
tr|A8JNK4|A8JNK4_DROME	A8JNK4	A8JNK4_DROME	Cip4	Cip4, isoform B	621680	835480	636349	782452	793547	753576
tr|A8JNL9|A8JNL9_DROME	A8JNL9	A8JNL9_DROME	CG10274	CG10274, isoform B	662527	630653	719792	578095	1.24993e+06	569323
tr|A8JNN0|A8JNN0_DROME	A8JNN0	A8JNN0_DROME	pbl	Pebble, isoform E	511709	849629	569328	791660	947785	739230
tr|A8JNN1|A8JNN1_DROME	A8JNN1	A8JNN1_DROME	Ect4	Ectoderm-expressed 4, isoform D	598176	880717	595353	800769	619998	915454
tr|A8JNN5|A8JNN5_DROME	A8JNN5	A8JNN5_DROME	GAPcenA	GapcenA, isoform B	689485	754923	738194	638948	908910	692250
tr|A8JNP1|A8JNP1_DROME	A8JNP1	A8JNP1_DROME	Argk	Arginine kinase, isoform G	604357	756565	681180	772314	720990	870917
tr|A8JNP7|A8JNP7_DROME	A8JNP7	A8JNP7_DROME	I-2	Inhibitor-2, isoform B	905244	352906	1.10415e+06	575279	914998	584303
tr|A8JNQ4|A8JNQ4_DROME	A8JNQ4	A8JNQ4_DROME	A2bp1	Ataxin-2 binding protein 1, isoform I	795819	588531	813159	835693	833952	581865
tr|A8JNS4|A8JNS4_DROME	A8JNS4	A8JNS4_DROME	stv	Starvin, isoform E	755035	660697	921665	710339	615468	771161
tr|A8JNT1|A8JNT1_DROME	A8JNT1	A8JNT1_DROME	CG12355	CG12355, isoform B	545866	991831	437141	1.10298e+06	384009	964136
tr|A8JNT4|A8JNT4_DROME	A8JNT4	A8JNT4_DROME	Mbs	Myosin binding subunit, isoform H	644105	779675	585468	763188	904447	738487
tr|A8JNT7|A8JNT7_DROME	A8JNT7	A8JNT7_DROME	Hsc20	Lethal (3) 72Do	777273	701253	728275	814683	606036	804555
tr|A8JNU2|A8JNU2_DROME	A8JNU2	A8JNU2_DROME	Abl	Abl tyrosine kinase, isoform B	587860	569066	715651	728840	964971	821905
tr|A8JNU6|A8JNU6_DROME	A8JNU6	A8JNU6_DROME	Nc73EF	Neural conserved at 73EF, isoform I	928700	740401	790890	662833	634275	695885
tr|A8JNV2|A8JNV2_DROME	A8JNV2	A8JNV2_DROME	CG34253	CG34253	970842	334144	830517	586214	1.06629e+06	629866
tr|A8JNV5|A8JNV5_DROME	A8JNV5	A8JNV5_DROME	Rad9	Rad9, isoform B	431723	958772	651706	896384	666249	816304
tr|A8JNW4|A8JNW4_DROME	A8JNW4	A8JNW4_DROME	skd	Skuld, isoform E	718706	851074	646290	750179	716563	750578
tr|A8JNW5|A8JNW5_DROME	A8JNW5	A8JNW5_DROME	CG34261	CG34261	255068	1.25193e+06	333833	1.00859e+06	336937	1.19948e+06
tr|A8JNX0|A8JNX0_DROME	A8JNX0	A8JNX0_DROME	ArfGAP3	ADP-ribosylation factor GTPase activating protein 3, isoform H	980756	509320	949638	543226	790694	665904
tr|A8JNX2|A8JNX2_DROME	A8JNX2	A8JNX2_DROME	SPoCk	Secretory pathway calcium atpase, isoform D	769490	699703	709958	696720	817850	731603
tr|A8JQU1|A8JQU1_DROME	A8JQU1	A8JQU1_DROME	CG1208	CG1208, isoform C	262966	1.67753e+06	118755	1.66822e+06	241924	553101
tr|A8JQV8|A8JQV8_DROME	A8JQV8	A8JQV8_DROME	pyd	Polychaetoid, isoform H	648188	683421	767075	638193	959886	714580
tr|A8JQW1|A8JQW1_DROME	A8JQW1	A8JQW1_DROME	CG8176	CG8176, isoform D	625829	785403	657191	752476	730995	857201
tr|A8JQW2|A8JQW2_DROME	A8JQW2	A8JQW2_DROME	Dh44	Diuretic hormone, isoform B	819778	409089	662652	451794	1.22071e+06	806155
tr|A8JQW3|A8JQW3_DROME	A8JQW3	A8JQW3_DROME	Pnn	Pinin, isoform B	564918	532446	747065	513505	699443	1.27219e+06
tr|A8JQX3|A8JQX3_DROME	A8JQX3	A8JQX3_DROME	cu	Nocturnin, isoform D	775765	873531	580806	503635	1.04124e+06	648644
tr|A8JQZ3|A8JQZ3_DROME	A8JQZ3	A8JQZ3_DROME	CG11670	CG11670, isoform E	437673	1.05442e+06	815460	682174	534200	895540
tr|A8JR05|A8JR05_DROME	A8JR05	A8JR05_DROME	cv-c	Crossveinless c, isoform C	840482	568242	647252	929876	891023	570919
tr|A8JR25|A8JR25_DROME	A8JR25	A8JR25_DROME	Fas1	Fasciclin 1, isoform D	442937	873684	641830	612215	1.23169e+06	603152
tr|A8JR30|A8JR30_DROME	A8JR30	A8JR30_DROME	CG34279	CG34279	522351	997145	467416	703470	991075	729280
[truncated: 4,579 more rows]

## Sheet: Muscle
Reference	Uniprot_Entry	Uniprot_GeneName	GeneName	Protein_Description	Mef2>mCherry-RNAi Rep_1	Mef2>Dp-RNAi Rep_1	Mef2>mCherry-RNAi Rep_2	Mef2>Dp-RNAi Rep_2	Mef2>mCherry-RNAi Rep_3	Mef2>Dp-RNAi Rep_3	Mef2>mCherry-RNAi Rep_4	Mef2>Dp-RNAi Rep_4
sp|A1A708|Y4951_DROME	A1A708	Y4951_DROME	CG4951	Uncharacterized protein CG4951	303690	481523	289743	509754	288647	584195	289238	556634
sp|A1Z6L1|TO402_DROME	A1Z6L1	TO402_DROME	tomboy40	Mitochondrial import receptor subunit TOM40 homolog 2	446113	368613	485327	353453	476570	382002	542193	429282
sp|A1Z7G7|LPHN_DROME	A1Z7G7	LPHN_DROME	Cirl	Latrophilin Cirl	451854	389819	302745	440079	368814	453221	513523	492441
sp|A1Z7T0-2|PKN_DROME	A1Z7T0-2	PKN_DROME	Pkn	Isoform 2 of Serine/threonine-protein kinase N	426358	432880	405802	417411	386238	433255	410355	453693
sp|A1Z897|SDF2B_DROME	A1Z897	SDF2B_DROME	CG12895	Succinate dehydrogenase assembly factor 2-B, mitochondrial	491854	304163	475883	312057	567048	311004	636149	472442
sp|A1Z8J0|C19L1_DROME	A1Z8J0	C19L1_DROME	CG7741	CWF19-like protein 1 homolog	241858	543939	242315	478858	246041	619729	291937	644389
sp|A1Z8N1|TRE11_DROME	A1Z8N1	TRE11_DROME	Tret1-1	Facilitated trehalose transporter Tret1-1	327875	551898	352801	522354	291403	449248	332573	383467
sp|A1Z8P9|TPR_DROME	A1Z8P9	TPR_DROME	Mtor	Nucleoprotein TPR	437844	419157	432271	414185	411469	441875	380003	434086
sp|A1Z9A2|U587_DROME	A1Z9A2	U587_DROME	CG4646	UPF0587 protein CG4646	390365	416282	356821	394751	427524	438875	518293	509740
sp|A1Z9A8|PTCD3_DROME	A1Z9A8	PTCD3_DROME	CG4679	Protein PTCD3 homolog, mitochondrial	414862	367069	416422	398083	435940	428317	530139	478714
sp|A1Z9E2|LIN54_DROME	A1Z9E2	LIN54_DROME	mip120	Protein lin-54 homolog	454318	376760	447296	435502	462788	385375	443269	386746
sp|A1Z9P3|SHRM_DROME	A1Z9P3	SHRM_DROME	Shroom	Protein Shroom	587076	316168	418906	245944	607401	391531	617869	431990
sp|A1ZA47|ZASP_DROME	A1ZA47	ZASP_DROME	Zasp52	PDZ and LIM domain protein Zasp	462354	355147	531890	364578	499849	387873	466127	392120
sp|A1ZA47-2|ZASP_DROME	A1ZA47-2	ZASP_DROME	Zasp52	Isoform A of PDZ and LIM domain protein Zasp	321908	460200	360129	472723	359704	527719	420498	448083
sp|A1ZA47-4|ZASP_DROME	A1ZA47-4	ZASP_DROME	Zasp52	Isoform E of PDZ and LIM domain protein Zasp	434257	357983	501723	372899	543842	394379	529268	362719
sp|A1ZA92|NOL9_DROME	A1ZA92	NOL9_DROME	CG8414	Polynucleotide 5'-hydroxyl-kinase NOL9	360528	490466	368468	480720	334245	503024	303892	444256
sp|A1ZAB5|CLU_DROME	A1ZAB5	CLU_DROME	clu	Protein clueless	527183	329514	526402	318541	495028	331623	586657	391597
sp|A1ZAI3|FACR2_DROME	A1ZAI3	FACR2_DROME	CG8303	Putative fatty acyl-CoA reductase CG8303	408623	428494	447238	493874	361498	384326	417422	356436
sp|A1ZAI5|FACR1_DROME	A1ZAI5	FACR1_DROME	CG5065	Putative fatty acyl-CoA reductase CG5065	448904	464892	449095	485379	349644	325895	367673	342458
sp|A1ZAJ2|KIF1A_DROME	A1ZAJ2	KIF1A_DROME	unc-104	Kinesin-like protein unc-104	349821	409258	344540	570757	381377	434402	417381	398344
sp|A1ZAU8|SSP4_DROME	A1ZAU8	SSP4_DROME	ssp4	Short spindle protein 4	446737	388860	427294	371122	476646	437337	457088	451337
sp|A1ZAU8-3|SSP4_DROME	A1ZAU8-3	SSP4_DROME	ssp4	Isoform B of Short spindle protein 4	647317	320982	530935	332976	422834	302863	524325	337075
sp|A1ZAW5|ICLN_DROME	A1ZAW5	ICLN_DROME	icln	Methylosome subunit pICln	464986	412440	386138	348858	475613	424552	459565	480810
sp|A1ZAX1|EIF3C_DROME	A1ZAX1	EIF3C_DROME	eIF3-S8	Eukaryotic translation initiation factor 3 subunit C	452961	401766	454239	386565	458554	364768	488211	408809
sp|A1ZB86|KLD10_DROME	A1ZB86	KLD10_DROME	slim	Kelch domain-containing protein 10 homolog	480755	289098	541212	310176	576402	452467	606278	357159
sp|A1ZBE8|DOP1_DROME	A1ZBE8	DOP1_DROME	CG15099	Protein dopey-1 homolog	371954	467646	377123	501596	365475	415258	390759	399573
sp|A1ZBT5|MED8_DROME	A1ZBT5	MED8_DROME	MED8	Mediator of RNA polymerase II transcription subunit 8	401692	347474	379011	369376	500060	538371	535419	489938
sp|A1ZBW7|FAM21_DROME	A1ZBW7	FAM21_DROME	CG16742	WASH complex subunit FAM21 homolog	353612	459762	363776	471597	351776	477670	408382	454954
sp|A2VEI2-2|MICU1_DROME	A2VEI2-2	MICU1_DROME	CG4495	Isoform A of Calcium uptake protein 1 homolog, mitochondrial	406114	309275	406862	300871	454082	1.05555e+06	430311	375264
sp|A8DYE2|TRPCG_DROME	A8DYE2	TRPCG_DROME	Trpm	Transient receptor potential cation channel trpm	332743	454168	412895	533742	355820	422391	341273	414779
sp|A8DYH2|UFM1_DROME	A8DYH2	UFM1_DROME	CG34191	Ubiquitin-fold modifier 1	431164	434953	443104	459674	281506	330111	349269	522254
sp|A8JUV0|SBNO_DROME	A8JUV0	SBNO_DROME	sno	Protein strawberry notch	407732	479144	336472	437797	339307	444330	368721	501094
sp|C4NYP8|F10A1_DROME	C4NYP8	F10A1_DROME	HIP	Hsc70-interacting protein 1	500272	399285	502540	342892	464601	332780	458380	410582
sp|E1JI63|SNMP2_DROME	E1JI63	SNMP2_DROME	Snmp2	Sensory neuron membrane protein 2	402589	439162	406782	405496	472028	350567	436413	470786
sp|O01382|ICE_DROME	O01382	ICE_DROME	Ice	Caspase	366537	428403	385052	527770	337385	482329	331379	431825
sp|O01666|ATPG_DROME	O01666	ATPG_DROME	ATPsyn-gamma	ATP synthase subunit gamma, mitochondrial	482212	327190	506636	338054	560213	366451	621185	346872
sp|O02193|MOF_DROME	O02193	MOF_DROME	mof	Males-absent on the first protein	484704	345724	490582	393071	534954	342946	407600	423341
sp|O02195|EIF3I_DROME	O02195	EIF3I_DROME	Trip1	Eukaryotic translation initiation factor 3 subunit I	453309	406268	468018	386155	431573	364045	465234	422611
sp|O02373|UGDH_DROME	O02373	UGDH_DROME	sgl	UDP-glucose 6-dehydrogenase	438520	513452	526043	449604	371427	344998	315616	260119
sp|O02649|CH60_DROME	O02649	CH60_DROME	Hsp60	60 kDa heat shock protein, mitochondrial	546726	307375	508881	297585	570881	344636	632450	360724
sp|O15943|CADN_DROME	O15943	CADN_DROME	CadN	Neural-cadherin	462975	336891	416855	475805	445059	378091	499658	384079
sp|O15943-2|CADN_DROME	O15943-2	CADN_DROME	CadN	Isoform A of Neural-cadherin	566358	303777	521439	318515	513605	334705	628292	343336
sp|O16129|SYFM_DROME	O16129	SYFM_DROME	Aats-phe	Probable phenylalanine--tRNA ligase, mitochondrial	525499	256677	562447	324818	546892	304110	698818	363688
sp|O16797|RL3_DROME	O16797	RL3_DROME	RpL3	60S ribosomal protein L3	514224	349754	555106	345590	465113	322465	521072	372459
sp|O17444|VACHT_DROME	O17444	VACHT_DROME	VAChT	Vesicular acetylcholine transporter	198386	329971	292295	812305	247468	528985	369847	436804
sp|O17468|HIRA_DROME	O17468	HIRA_DROME	Hira	Protein HIRA homolog	423659	485498	389547	421754	355513	417142	374500	441840
sp|O18334|RAB6_DROME	O18334	RAB6_DROME	Rab6	Ras-related protein Rab6	417548	400591	427044	438223	394819	403195	460473	438206
sp|O18373|SPS1_DROME	O18373	SPS1_DROME	SelD	Selenide, water dikinase	450797	420909	448545	410137	405917	369115	416638	432570
sp|O18404|HCD2_DROME	O18404	HCD2_DROME	scu	3-hydroxyacyl-CoA dehydrogenase type-2	457529	380413	494298	413372	445834	353101	498976	357689
sp|O18405|SURF4_DROME	O18405	SURF4_DROME	Surf4	Surfeit locus protein 4 homolog	370997	426489	388113	486519	370629	409596	407686	468463
sp|O18408|AMYR_DROME	O18408	AMYR_DROME	Amyrel	Alpha-amylase-related protein	81456.9	858691	164976	815456	94059.4	322782	49250.2	352672
sp|O18413|PRS8_DROME	O18413	PRS8_DROME	Rpt6	26S protease regulatory subunit 8	420210	448118	432289	438437	385303	382847	401875	414341
sp|O44342|WBL_DROME	O44342	WBL_DROME	wbl	Protein windbeutel	474434	388133	446131	382439	407548	443534	445479	430614
sp|O44386-2|ITA3_DROME	O44386-2	ITA3_DROME	scb	Isoform A of Integrin alpha-PS3	354709	442060	396022	507398	373079	456301	380201	405469
sp|O46036|CTBP_DROME	O46036	CTBP_DROME	CtBP	C-terminal-binding protein	456361	412775	418911	437084	459006	431153	448252	322284
sp|O46037|VINC_DROME	O46037	VINC_DROME	Vinc	Vinculin	497670	435469	417517	400396	430434	387620	390594	387109
sp|O46040|MSTAA_DROME	O46040	MSTAA_DROME	msta	Protein msta, isoform A	489422	417814	487079	318387	504001	406163	380511	427852
sp|O46072|KZ_DROME	O46072	KZ_DROME	kz	Probable ATP-dependent RNA helicase kurz	219271	541003	224166	528994	211756	629733	216248	684795
sp|O46084|PGAM5_DROME	O46084	PGAM5_DROME	Pgam5	Serine/threonine-protein phosphatase Pgam5, mitochondrial	431805	384831	452073	406924	470276	398780	466411	414518
sp|O46098|BCN92_DROME	O46098	BCN92_DROME	bcn92	Protein bcn92	336552	522485	343102	487225	300807	425674	332790	498774
sp|O46106|NOI_DROME	O46106	NOI_DROME	noi	Splicing factor 3A subunit 3	399203	435105	394155	435208	382947	499586	343533	470898
sp|O46107|LIP1_DROME	O46107	LIP1_DROME	Lip1	Lipase 1	900403	311611	465606	204121	498938	231504	527320	307617
sp|O46339|HTH_DROME	O46339	HTH_DROME	hth	Homeobox protein homothorax	508367	329280	502452	309706	633651	396881	599085	303290
sp|O61305|DDX19_DROME	O61305	DDX19_DROME	Dbp80	DEAD-box helicase Dbp80	427097	433561	390506	368418	449019	452429	456192	460085
sp|O61345|PEN_DROME	O61345	PEN_DROME	pen	Protein penguin	216622	600710	212340	557855	188115	562616	190835	638639
sp|O61443|MK14B_DROME	O61443	MK14B_DROME	p38b	Mitogen-activated protein kinase 14B	498664	376583	501738	340577	532730	369602	486431	359417
sp|O61491|FLOT1_DROME	O61491	FLOT1_DROME	Flo-1	Flotillin-1	487863	385937	451936	412234	489092	380455	442580	347674
sp|O61613|NMT_DROME	O61613	NMT_DROME	Nmt	Glycylpeptide N-tetradecanoyltransferase	513291	359328	495083	327165	490376	346075	544325	404651
sp|O62619|KPYK_DROME	O62619	KPYK_DROME	PyK	Pyruvate kinase	640640	247901	674039	223764	720647	219254	664568	233575
sp|O62621|COPB2_DROME	O62621	COPB2_DROME	beta'Cop	Coatomer subunit beta'	426870	445741	455588	451061	384406	369644	382206	386238
sp|O76206|RIFK_DROME	O76206	RIFK_DROME	anon-84Ea	Putative riboflavin kinase	374892	481867	351077	439823	369862	496811	322648	493000
sp|O76324|DCO_DROME	O76324	DCO_DROME	dco	Discs overgrown protein kinase	525720	391895	487211	397736	397454	320335	425993	394339
sp|O76454|PHS_DROME	O76454	PHS_DROME	Pcd	Pterin-4-alpha-carbinolamine dehydratase	313178	499998	298373	513076	313512	530578	314420	501512
sp|O76464|NFT1_DROME	O76464	NFT1_DROME	NitFhit	Nitrilase and fragile histidine triad fusion protein NitFhit	435755	378688	459551	397332	478322	350020	551947	395542
sp|O76511|TYSY_DROME	O76511	TYSY_DROME	Ts	Thymidylate synthase	366222	491217	334953	391947	387257	483791	386687	539113
sp|O76767|ERD2_DROME	O76767	ERD2_DROME	KdelR	ER lumen protein retaining receptor	316487	419267	392294	578894	382986	332532	410605	433433
sp|O76879|CCCP_DROME	O76879	CCCP_DROME	anon-3B1.2	Circadian clock-controlled protein	186272	245680	361336	1.12173e+06	149418	577956	237172	121261
sp|O76932|PP4C_DROME	O76932	PP4C_DROME	Pp4-19C	Serine/threonine-protein phosphatase 4 catalytic subunit	557232	340967	589430	297954	591423	314035	491570	308604
sp|O77051|E2F2_DROME	O77051	E2F2_DROME	E2f2	Transcription factor E2F2	550504	353620	534293	326439	547497	345172	518250	301396
sp|O77264|RTCA_DROME	O77264	RTCA_DROME	CG4061	RNA 3'-terminal phosphate cyclase	605366	311952	565444	279522	612460	291985	566780	298308
sp|O77277|TORS_DROME	O77277	TORS_DROME	Torsin	Torsin-like protein	349542	447200	374747	490646	342135	455311	390387	471413
sp|O77410|EIF3E_DROME	O77410	EIF3E_DROME	eIF3-S6	Eukaryotic translation initiation factor 3 subunit E	474474	387064	501748	391164	483065	378625	505326	305098
sp|O96539|ATE1_DROME	O96539	ATE1_DROME	Ate1	Arginyl-tRNA--protein transferase 1	407982	448398	394714	420940	420698	417296	406156	448010
sp|O96539-4|ATE1_DROME	O96539-4	ATE1_DROME	Ate1	Isoform C of Arginyl-tRNA--protein transferase 1	435042	367795	468355	416205	361587	418069	499282	446036
sp|O96553|C1TC_DROME	O96553	C1TC_DROME	pug	C-1-tetrahydrofolate synthase, cytoplasmic	159548	548799	213375	805032	134371	486478	174422	482836
sp|O96651|TOP3B_DROME	O96651	TOP3B_DROME	Top3beta	DNA topoisomerase 3-beta	426941	417339	436443	421896	428009	397688	445384	406681
sp|O96827|EF1B_DROME	O96827	EF1B_DROME	Ef1beta	Probable elongation factor 1-beta	727833	204372	710308	189829	701019	193388	718344	202630
sp|O96838|FYV1_DROME	O96838	FYV1_DROME	fab1	Putative 1-phosphatidylinositol 3-phosphate 5-kinase	374920	443885	391876	437960	398445	464823	404201	456633
sp|O97125|HSP68_DROME	O97125	HSP68_DROME	Hsp68	Heat shock protein 68	400710	445457	449414	424581	352374	389214	383594	480137
sp|O97172|U729_DROME	O97172	U729_DROME	CG18508	UPF0729 protein CG18508	329297	486820	331630	474177	346207	494057	342859	512456
sp|O97422|B3GI_DROME	O97422	B3GI_DROME	GlcAT-I	Galactosylgalactosylxylosylprotein 3-beta-glucuronosyltransferase I	439741	345972	444068	413221	521274	378211	534506	394949
sp|O97477|INO1_DROME	O97477	INO1_DROME	Inos	Inositol-3-phosphate synthase	168615	961881	227058	560470	117752	405333	129508	303167
sp|P00334|ADH_DROME	P00334	ADH_DROME	Adh	Alcohol dehydrogenase	309429	559143	424622	534142	331056	392117	321945	315071
sp|P00399|COX1_DROME	P00399	COX1_DROME	mt:CoI	Cytochrome c oxidase subunit 1	389742	326948	469835	409217	599577	394010	544801	393409
sp|P00408|COX2_DROME	P00408	COX2_DROME	mt:CoII	Cytochrome c oxidase subunit 2	485851	338538	483271	346574	546418	423260	602212	319052
sp|P00417|COX3_DROME	P00417	COX3_DROME	mt:CoIII	Cytochrome c oxidase subunit 3	397326	272729	377424	371486	710533	364023	834938	374272
sp|P00850|ATP6_DROME	P00850	ATP6_DROME	mt:ATPase6	ATP synthase subunit a	398861	341141	475298	368960	586673	376643	553888	435485
sp|P00967|PUR2_DROME	P00967	PUR2_DROME	ade3	Trifunctional purine biosynthetic protein adenosine-3	247053	468620	307064	702966	207067	455417	257145	478000
sp|P02255|H1_DROME	P02255	H1_DROME	His1	Histone H1	649584	362039	631044	356672	400999	240799	386830	272943
sp|P02283|H2B_DROME	P02283	H2B_DROME	His2B	Histone H2B	531374	365155	521332	389385	479559	352337	417938	330342
sp|P02299|H3_DROME	P02299	H3_DROME	His3	Histone H3	503123	283093	569312	371425	562284	346306	505844	358661
sp|P02515|HSP22_DROME	P02515	HSP22_DROME	Hsp22	Heat shock protein 22	490316	464577	365677	288386	419109	408741	503137	509916
sp|P02517|HSP26_DROME	P02517	HSP26_DROME	Hsp26	Heat shock protein 26	542675	396841	458939	287023	457858	376856	485704	456897
sp|P02518|HSP27_DROME	P02518	HSP27_DROME	Hsp27	Heat shock protein 27	430410	453752	359825	422703	328497	408118	390767	529837
sp|P02572|ACT2_DROME	P02572	ACT2_DROME	Act42A	Actin-42A	406031	414033	455497	483057	367892	428308	380939	382216
sp|P02825|HSP71_DROME	P02825	HSP71_DROME	Hsp70Ab	Major heat shock 70 kDa protein Ab	282785	377269	348334	568032	358962	538455	366476	515553
sp|P02840|SGS3_DROME	P02840	SGS3_DROME	Sgs3	Salivary glue protein Sgs-3	754079	366682	395312	569564	278747	258028	248913	206921
sp|P02842|SGS8_DROME	P02842	SGS8_DROME	Sgs8	Salivary glue protein Sgs-8	392582	300367	438770	391839	731664	462392	508916	378074
sp|P02843|VIT1_DROME	P02843	VIT1_DROME	Yp1	Vitellogenin-1	33616.7	1.0901e+06	43910.5	670421	33738.9	550075	37380.7	313092
sp|P02844|VIT2_DROME	P02844	VIT2_DROME	Yp2	Vitellogenin-2	41606.4	1.02459e+06	67740.7	657243	44939.4	598310	66261	341815
sp|P04052|RPB1_DROME	P04052	RPB1_DROME	RpII215	DNA-directed RNA polymerase II subunit RPB1	414822	391875	456232	405193	460369	432689	442327	423694
sp|P04197|MYB_DROME	P04197	MYB_DROME	Myb	Myb protein	406176	494434	385242	434568	390175	451650	289738	443454
sp|P04359|RL32_DROME	P04359	RL32_DROME	RpL32	60S ribosomal protein L32	557771	334114	574640	307144	561073	254156	556161	338378
sp|P04388|RAS2_DROME	P04388	RAS2_DROME	Ras64B	Ras-like protein 2	389782	446852	380497	477939	396820	435396	403180	400634
sp|P05031|DDC_DROME	P05031	DDC_DROME	Ddc	Aromatic-L-amino-acid decarboxylase	394423	380526	465087	520956	396346	411096	394678	358639
sp|P05205|HP1_DROME	P05205	HP1_DROME	Su(var)205	Heterochromatin protein 1	398195	430428	389453	423255	385365	489906	420226	456341
sp|P05389|RLA2_DROME	P05389	RLA2_DROME	RpLP2	60S acidic ribosomal protein P2	612406	359522	655111	321605	406191	206838	515845	286835
sp|P05552|ADF1_DROME	P05552	ADF1_DROME	Adf1	Transcription factor Adf-1	427440	426602	435001	402283	453801	391851	416142	431616
sp|P05661-10|MYSA_DROME	P05661-10	MYSA_DROME	Mhc	Isoform 11b of Myosin heavy chain, muscle	648029	246774	691449	260438	909959	233451	329371	233075
sp|P05661-18|MYSA_DROME	P05661-18	MYSA_DROME	Mhc	Isoform E of Myosin heavy chain, muscle	376809	386914	492478	733347	333954	296801	174291	263186
sp|P05661-6|MYSA_DROME	P05661-6	MYSA_DROME	Mhc	Isoform 7c of Myosin heavy chain, muscle	918911	252698	782140	144362	949519	149609	142428	129993
sp|P05661-7|MYSA_DROME	P05661-7	MYSA_DROME	Mhc	Isoform 7d of Myosin heavy chain, muscle	625277	206315	705424	236731	692080	266348	702617	224757
sp|P05812|HSP6A_DROME	P05812	HSP6A_DROME	Hsp67Ba	Heat shock protein 67B1	408239	542005	233491	498236	228523	447940	418845	454260
sp|P05990|PYR1_DROME	P05990	PYR1_DROME	r	CAD protein	349121	559729	323287	439725	282478	433981	311473	546761
sp|P06604|TBA2_DROME	P06604	TBA2_DROME	alphaTub85E	Tubulin alpha-2 chain	414904	472567	332299	377541	408830	456439	403676	525147
sp|P06607|VIT3_DROME	P06607	VIT3_DROME	Yp3	Vitellogenin-3	183772	762551	197023	520832	266840	628847	268518	342719
sp|P06742|MLC1_DROME	P06742	MLC1_DROME	Mlc1	Myosin light chain alkali	548558	325870	618179	305810	576524	338759	456743	316868
sp|P06742-2|MLC1_DROME	P06742-2	MLC1_DROME	Mlc1	Isoform Indirect flight muscle of Myosin light chain alkali	544994	284186	577229	323274	639661	353259	555480	279668
sp|P06754-2|TPM1_DROME	P06754-2	TPM1_DROME	Tm1	Isoform A of Tropomyosin-1, isoforms 9A/A/B	488629	340097	603573	306992	563492	372994	496154	343301
sp|P07190|MAL1_DROME	P07190	MAL1_DROME	Mal-A1	Maltase A1	274547	810606	265300	553908	294997	373940	297306	155121
sp|P07192|MAL3_DROME	P07192	MAL3_DROME	Mal-A3	Maltase A3	373860	607644	455311	604841	359843	240932	192653	176804
sp|P07486|G3P1_DROME	P07486	G3P1_DROME	Gapdh1	Glyceraldehyde-3-phosphate dehydrogenase 1	647191	224375	711347	191298	776333	208118	671117	239185
sp|P07664|SRYD_DROME	P07664	SRYD_DROME	Sry-delta	Serendipity locus protein delta	464343	408563	419630	413678	469152	401134	425799	386624
sp|P07665|SRYB_DROME	P07665	SRYB_DROME	Sry-beta	Serendipity locus protein beta	484781	357096	508943	363116	504313	369210	485045	384526
sp|P07668|CLAT_DROME	P07668	CLAT_DROME	Cha	Choline O-acetyltransferase	357967	318879	316146	454586	408475	814464	559348	375169
sp|P07701|SGS5_DROME	P07701	SGS5_DROME	Sgs5	Salivary glue protein Sgs-5	664418	378814	422264	561131	374073	297826	258301	184141
sp|P07764|ALF_DROME	P07764	ALF_DROME	Ald	Fructose-bisphosphate aldolase	642417	256354	632039	192465	798222	237862	662130	249488
sp|P08120|CO4A1_DROME	P08120	CO4A1_DROME	Cg25C	Collagen alpha-1(IV) chain	318039	444167	384393	494267	385494	547969	317567	455066
sp|P08144|AMYA_DROME	P08144	AMYA_DROME	Amy-p	Alpha-amylase A	183276	686395	243661	724823	207874	443949	182467	303472
sp|P08266|RPB2_DROME	P08266	RPB2_DROME	RpII140	DNA-directed RNA polymerase II subunit RPB2	404344	444945	426116	409591	397707	463758	381321	444056
sp|P08630|BTKL_DROME	P08630	BTKL_DROME	Btk29A	Tyrosine-protein kinase Btk29A	306580	445569	336951	605846	341493	422596	319067	450991
sp|P08646|RAS1_DROME	P08646	RAS1_DROME	Ras85D	Ras-like protein 1	479256	363269	430048	416248	489661	388272	505998	362416
sp|P08736|EF1A1_DROME	P08736	EF1A1_DROME	Ef1alpha48D	Elongation factor 1-alpha 1	380222	538145	367813	676478	170458	352771	190336	316886
sp|P08841|TBB3_DROME	P08841	TBB3_DROME	betaTub60D	Tubulin beta-3 chain	370092	515641	354993	416914	341883	480028	346217	494472
sp|P08879|NDKA_DROME	P08879	NDKA_DROME	awd	Nucleoside diphosphate kinase	403394	451876	414296	385663	408875	430634	411804	481151
sp|P08953|TOLL_DROME	P08953	TOLL_DROME	Tl	Protein toll	386291	394055	363620	471259	601630	371748	488103	357155
sp|P08970|SUHW_DROME	P08970	SUHW_DROME	su(Hw)	Protein suppressor of hairy wing	490638	409302	479809	400881	435416	373104	367020	391496
sp|P09180|RL4_DROME	P09180	RL4_DROME	RpL4	60S ribosomal protein L4	512929	321571	585215	314233	544921	318640	587175	337595
sp|P09208|INSR_DROME	P09208	INSR_DROME	InR	Insulin-like receptor	422505	463238	380730	451563	375294	433060	351361	429597
sp|P09491|TPM2_DROME	P09491	TPM2_DROME	Tm2	Tropomyosin-2	559824	295402	629692	294937	575888	336069	484693	339598
sp|P0DKM0|COA3_DROME	P0DKM0	COA3_DROME	Ccdc56	Cytochrome c oxidase assembly factor 3, mitochondrial	535012	303321	523638	307065	559663	353333	605044	371268
sp|P10040|CRB_DROME	P10040	CRB_DROME	crb	Protein crumbs	416310	380164	438582	416578	472728	424180	479111	412299
sp|P10090|WHITE_DROME	P10090	WHITE_DROME	w	Protein white	541262	306890	560821	296485	567407	357616	549834	364155
sp|P10351|XDH_DROME	P10351	XDH_DROME	ry	Xanthine dehydrogenase	230019	520450	316516	699640	250756	445647	296517	359585
sp|P10379|UZIP_DROME	P10379	UZIP_DROME	uzip	Protein unzipped	344621	371815	382331	533203	421147	482947	420312	421781
sp|P10552|FMRF_DROME	P10552	FMRF_DROME	Fmrf	FMRFamide-related peptides	329986	505862	352819	614849	177462	372173	291812	463911
sp|P10987|ACT1_DROME	P10987	ACT1_DROME	Act5C	Actin-5C	393392	342958	401347	490456	441922	486832	426753	433836
sp|P11046|LAMB1_DROME	P11046	LAMB1_DROME	LanB1	Laminin subunit beta-1	431346	423634	440493	408196	415759	447351	402897	413288
sp|P11146|HSP7B_DROME	P11146	HSP7B_DROME	Hsc70-2	Heat shock 70 kDa protein cognate 2	501474	332899	491717	318587	553638	411006	550929	384854
sp|P11147|HSP7D_DROME	P11147	HSP7D_DROME	Hsc70-4	Heat shock 70 kDa protein cognate 4	452205	379673	471301	377214	476203	393314	494206	405231
sp|P11346|KRAF1_DROME	P11346	KRAF1_DROME	phl	Raf homolog serine/threonine-protein kinase phl	457373	331526	417547	439616	513806	340430	566438	389907
sp|P11584|ITBX_DROME	P11584	ITBX_DROME	mys	Integrin beta-PS	475465	419541	453999	428981	422391	410794	399149	336567
sp|P11995|LSP1A_DROME	P11995	LSP1A_DROME	Lsp1alpha	Larval serum protein 1 alpha chain	136224	668225	126355	753767	71717.5	514220	100356	581022
sp|P11996|LSP1B_DROME	P11996	LSP1B_DROME	Lsp1beta	Larval serum protein 1 beta chain	167592	615058	197362	713683	79188.5	505890	134464	591318
sp|P11997|LSP1G_DROME	P11997	LSP1G_DROME	Lsp1gamma	Larval serum protein 1 gamma chain	195816	607504	204858	676742	114362	514442	122907	597569
sp|P12024|CHAO_DROME	P12024	CHAO_DROME	chp	Chaoptin	251958	572931	340668	824030	260420	199149	228871	223986
sp|P12080|ITA2_DROME	P12080	ITA2_DROME	if	Integrin alpha-PS2	515638	397182	466397	373571	441721	363662	465344	372716
sp|P12370|KAPC_DROME	P12370	KAPC_DROME	Pka-C1	cAMP-dependent protein kinase catalytic subunit	417554	345607	477090	387635	512727	343581	571642	434903
sp|P12426|APT_DROME	P12426	APT_DROME	Aprt	Adenine phosphoribosyltransferase	439960	428050	395151	468589	399064	381019	403151	402068
sp|P12646|G6PD_DROME	P12646	G6PD_DROME	Zw	Glucose-6-phosphate 1-dehydrogenase	232231	530497	327487	687020	239224	448973	239373	395616
sp|P12881|PSA1_DROME	P12881	PSA1_DROME	Prosalpha6	Proteasome subunit alpha type-1	475605	417045	446051	403589	433656	353078	430880	401809
sp|P12982|PP12_DROME	P12982	PP12_DROME	Pp1-87B	Serine/threonine-protein phosphatase alpha-2 isoform	449363	338277	491115	363120	543878	399085	520170	406121
sp|P13002-1|ELF1_DROME	P13002-1	ELF1_DROME	grh	Isoform N of Protein grainyhead	455340	367266	449371	413942	501317	448426	387481	401784
sp|P13060|EF2_DROME	P13060	EF2_DROME	EF2	Elongation factor 2	378873	465096	387073	402064	381462	476153	402492	488579
sp|P13469|MODU_DROME	P13469	MODU_DROME	mod	DNA-binding protein modulo	272586	546491	281178	491042	233824	546122	261167	619004
sp|P13496|DCTN1_DROME	P13496	DCTN1_DROME	Gl	Dynactin subunit 1	491560	347520	508124	359588	520352	356824	536976	358760
sp|P13607|ATNA_DROME	P13607	ATNA_DROME	Atpalpha	Sodium/potassium-transporting ATPase subunit alpha	294773	432225	339843	576791	351137	491173	390483	428400
sp|P14130|RS14_DROME	P14130	RS14_DROME	RpS14a	40S ribosomal protein S14	502952	325601	539437	358189	511432	323246	589919	339844
sp|P14199|REF2P_DROME	P14199	REF2P_DROME	ref(2)P	Protein ref(2)P	203952	552668	227308	627846	228048	567775	218017	546640
sp|P14318|MP20_DROME	P14318	MP20_DROME	Mp20	Muscle-specific protein 20	383044	439165	533293	696362	267011	270765	226397	218172
sp|P15007|ENO_DROME	P15007	ENO_DROME	Eno	Enolase	625461	248199	680232	201731	755504	222409	669362	252089
sp|P15215|LAMC1_DROME	P15215	LAMC1_DROME	LanB2	Laminin subunit gamma-1	483773	380928	472587	389131	445555	409271	434885	393583
sp|P15330|DORS_DROME	P15330	DORS_DROME	dl	Embryonic polarity protein dorsal	520341	372223	504563	331424	495584	371792	511284	358616
sp|P15357|RS27A_DROME	P15357	RS27A_DROME	RpS27A	Ubiquitin-40S ribosomal protein S27a	494717	329684	555382	327392	558549	344302	541573	363088
sp|P16163|URIC_DROME	P16163	URIC_DROME	Uro	Uricase	27712.4	614694	69666.5	1.40288e+06	58681.5	230882	33688.4	33663.1
sp|P16371|GROU_DROME	P16371	GROU_DROME	gro	Protein groucho	478027	402006	436338	353709	501791	424375	467986	392440
sp|P16378|GNAO_DROME	P16378	GNAO_DROME	Galphao	G protein alpha o subunit	359402	410695	344933	565946	378631	464691	368089	406646
sp|P16620|PTP69_DROME	P16620	PTP69_DROME	Ptp69D	Tyrosine-protein phosphatase 69D	491027	346940	467279	380681	518509	370049	519930	374176
sp|P16912|KDC2_DROME	P16912	KDC2_DROME	Pka-C3	Protein kinase DC2	370084	529374	383492	654808	302194	329357	215011	267144
sp|P17210|KINH_DROME	P17210	KINH_DROME	Khc	Kinesin heavy chain	483491	421195	464022	391634	442362	376462	446492	351639
sp|P17336|CATA_DROME	P17336	CATA_DROME	Cat	Catalase	301615	468562	348106	619785	297602	437214	291986	425099
sp|P17704|RS17_DROME	P17704	RS17_DROME	RpS17	40S ribosomal protein S17	589467	332762	533384	333524	546012	315413	551051	272737
sp|P17719|DYR_DROME	P17719	DYR_DROME	Dhfr	Dihydrofolate reductase	337746	517925	334560	486101	333297	470582	277729	499620
sp|P17789|TTKB_DROME	P17789	TTKB_DROME	ttk	Protein tramtrack, beta isoform	460027	445524	450262	398312	403312	391775	383826	408102
sp|P17886|CRN_DROME	P17886	CRN_DROME	crn	Protein crooked neck	443609	423450	445055	394774	439360	427978	387287	422702
sp|P17917|PCNA_DROME	P17917	PCNA_DROME	PCNA	Proliferating cell nuclear antigen	443673	448779	426266	392675	392096	374789	438765	441472
sp|P18053|PSA4_DROME	P18053	PSA4_DROME	Prosalpha3	Proteasome subunit alpha type-4	436960	437882	378696	403192	437759	429717	420077	444379
sp|P18106|FPS_DROME	P18106	FPS_DROME	Fps85D	Tyrosine-protein kinase Fps85D	525046	369194	486977	341661	507009	367469	480063	376314
sp|P18173|DHGL_DROME	P18173	DHGL_DROME	Gld	Glucose dehydrogenase [FAD, quinone]	753342	360454	450531	320936	399031	262072	430946	357268
sp|P18432|MLR_DROME	P18432	MLR_DROME	Mlc2	Myosin regulatory light chain 2	577795	264049	644056	272233	681450	281309	597783	272033
sp|P18459|TY3H_DROME	P18459	TY3H_DROME	ple	Tyrosine 3-monooxygenase	344647	480912	403474	426475	403543	482966	316126	487863
sp|P18487|A37C_DROME	P18487	A37C_DROME	anon-37Cs	Protein anon-37Cs	626383	230198	637798	238015	745495	234006	691554	249445
sp|P18489|SYB_DROME	P18489	SYB_DROME	Syb	Synaptobrevin	379142	489046	321837	411426	388453	557425	341254	487261
sp|P18929|NU1M_DROME	P18929	NU1M_DROME	mt:ND1	NADH-ubiquinone oxidoreductase chain 1	485684	331678	591710	306620	641321	292125	589613	309337
sp|P18930|NU3M_DROME	P18930	NU3M_DROME	mt:ND3	NADH-ubiquinone oxidoreductase chain 3	541822	349391	636861	308186	531239	233866	545399	307005
sp|P18932|NU5M_DROME	P18932	NU5M_DROME	mt:ND5	NADH-ubiquinone oxidoreductase chain 5	385887	324985	500848	385163	561102	368747	626497	395836
sp|P18934|NU4LM_DROME	P18934	NU4LM_DROME	mt:ND4L	NADH-ubiquinone oxidoreductase chain 4L	577473	386438	568501	361185	537916	284324	551563	143868
sp|P18935|CYB_DROME	P18935	CYB_DROME	mt:Cyt-b	Cytochrome b	496682	278367	544849	272660	675272	312869	799214	304060
sp|P19107|ARRB_DROME	P19107	ARRB_DROME	Arr2	Phosrestin-1	221833	618445	289549	849989	206566	246069	210577	221529
sp|P19109|DDX17_DROME	P19109	DDX17_DROME	Rm62	ATP-dependent RNA helicase p62	436109	409982	425009	396594	423522	422144	432005	457335
sp|P19339-7|SXL_DROME	P19339-7	SXL_DROME	Sxl	Isoform G of Protein sex-lethal	419459	490621	374397	384826	342822	488431	352477	492552
sp|P19538|CI_DROME	P19538	CI_DROME	ci	Transcriptional activator cubitus interruptus	555937	343374	593382	262316	584495	279135	602629	313543
sp|P20007|PCKG_DROME	P20007	PCKG_DROME	Pepck	Phosphoenolpyruvate carboxykinase [GTP]	139602	794136	155852	531698	115040	556573	129561	633356
sp|P20028|RPA2_DROME	P20028	RPA2_DROME	RpI135	DNA-directed RNA polymerase I subunit RPA2	229614	565045	233233	504278	220181	620706	222902	659893
sp|P20227|TBP_DROME	P20227	TBP_DROME	Tbp	TATA-box-binding protein	439596	433556	475141	378673	411062	498587	346619	404924
sp|P20240|OTE_DROME	P20240	OTE_DROME	Ote	Otefin	452869	437921	410371	409984	422854	432730	344013	439232
sp|P20348|JANA_DROME	P20348	JANA_DROME	janA	Sex-regulated protein janus-A	512133	367223	499800	316920	530951	350974	464209	428805
sp|P20351|T23O_DROME	P20351	T23O_DROME	v	Tryptophan 2,3-dioxygenase	211801	512039	247523	641782	236416	527871	250798	554930
sp|P20353|GNAI_DROME	P20353	GNAI_DROME	Galphai	G protein alpha i subunit	403229	434992	384879	435547	432531	434390	438916	418632
sp|P20354|GNAS_DROME	P20354	GNAS_DROME	Galphas	G protein alpha s subunit	380760	435241	356539	483286	400957	439537	419635	431048
sp|P20432|GSTT1_DROME	P20432	GSTT1_DROME	GstD1	Glutathione S-transferase 1-1	320344	572257	394170	556289	288870	352512	280500	363539
sp|P20478|GLNA2_DROME	P20478	GLNA2_DROME	Gs2	Glutamine synthetase 2 cytoplasmic	249980	550434	297264	590076	255211	519542	275220	451031
sp|P20478-3|GLNA2_DROME	P20478-3	GLNA2_DROME	Gs2	Isoform B of Glutamine synthetase 2 cytoplasmic	261513	723528	305991	510140	308473	510275	266516	256837
sp|P21187|PABP_DROME	P21187	PABP_DROME	pAbp	Polyadenylate-binding protein	452850	366703	476283	356729	492104	390220	508791	434603
sp|P21461|SINA_DROME	P21461	SINA_DROME	sina	E3 ubiquitin-protein ligase sina	536000	419320	437142	394705	380988	329303	436876	395532
sp|P21521|SY65_DROME	P21521	SY65_DROME	Syt1	Synaptotagmin 1	203322	429801	231919	780349	231981	518029	278267	473434
sp|P21914|SDHB_DROME	P21914	SDHB_DROME	SdhB	Succinate dehydrogenase [ubiquinone] iron-sulfur subunit, mitochondrial	519968	295675	574298	303765	598580	309625	653071	321277
sp|P22293|SUS_DROME	P22293	SUS_DROME	su(s)	Protein suppressor of sable	395074	393168	390181	406344	450754	443214	461510	504366
sp|P22464|ANXB9_DROME	P22464	ANXB9_DROME	AnxB9	Annexin B9	439997	425302	429731	428751	426600	407389	409135	392592
sp|P22465|ANX10_DROME	P22465	ANX10_DROME	AnxB10	Annexin B10	396811	419820	416944	482901	390889	440671	386225	398799
sp|P22700|ATC1_DROME	P22700	ATC1_DROME	Ca-P60A	Calcium-transporting ATPase sarcoplasmic/endoplasmic reticulum type	530992	317167	589834	333565	606683	293356	521438	302941
sp|P22700-2|ATC1_DROME	P22700-2	ATC1_DROME	Ca-P60A	Isoform A of Calcium-transporting ATPase sarcoplasmic/endoplasmic reticulum type	664994	314466	643852	281259	800863	225229	311479	217144
sp|P22769|PSA71_DROME	P22769	PSA71_DROME	Prosalpha4	Proteasome subunit alpha type-7-1	415543	432100	415347	405923	439527	423501	442270	423654
sp|P22813|HSF_DROME	P22813	HSF_DROME	Hsf	Heat shock factor protein	505605	474181	464080	383386	393095	358928	331003	380404
sp|P22817|IDE_DROME	P22817	IDE_DROME	Ide	Insulin-degrading enzyme	430281	414671	410430	380260	464703	417398	495291	430206
sp|P22979|HSP6C_DROME	P22979	HSP6C_DROME	Hsp67Bc	Heat shock protein 67B3	363558	442600	336921	636881	292472	338785	388836	375383
sp|P23128|DDX6_DROME	P23128	DDX6_DROME	me31B	Putative ATP-dependent RNA helicase me31b	489067	380697	440993	359187	497680	378013	478340	426203
sp|P23226|MA205_DROME	P23226	MA205_DROME	Map205	205 kDa microtubule-associated protein	495126	424075	442995	346150	379563	379139	436248	482242
sp|P23380|VATL_DROME	P23380	VATL_DROME	Vha16-1	V-type proton ATPase 16 kDa proteolipid subunit	319200	387896	409191	492690	388296	531718	411498	462785
sp|P23625-2|GNAQ_DROME	P23625-2	GNAQ_DROME	Galphaq	Isoform A of G protein alpha q subunit	469900	356553	462086	401811	509025	345277	532837	371331
sp|P23696|PP2A_DROME	P23696	PP2A_DROME	mts	Serine/threonine-protein phosphatase PP2A	457696	353995	499135	326076	606903	368130	534981	389262
sp|P23779|CYTL_DROME	P23779	CYTL_DROME	Cys	Cystatin-like protein	361916	407926	384119	501972	445019	440032	499176	349540
sp|P24156|L2CC_DROME	P24156	L2CC_DROME	l(2)37Cc	Protein l(2)37Cc	463890	368910	439774	347755	517607	409666	557241	406431
sp|P24785|MLE_DROME	P24785	MLE_DROME	mle	Dosage compensation regulator	331985	483527	340241	486635	306732	498047	311461	531487
sp|P25007|PPIA_DROME	P25007	PPIA_DROME	Cyp1	Peptidyl-prolyl cis-trans isomerase	466947	380147	467741	370088	490058	385200	503474	390575
sp|P25160|ARL1_DROME	P25160	ARL1_DROME	Arl1	ADP-ribosylation factor-like protein 1	362491	400538	410244	440121	389492	462758	460101	487109
sp|P25167|RPC2_DROME	P25167	RPC2_DROME	RpIII128	DNA-directed RNA polymerase III subunit RPC2	447570	512514	419676	447183	359169	402425	353611	313877
sp|P25171|RCC1_DROME	P25171	RCC1_DROME	Rcc1	Regulator of chromosome condensation	435265	525820	438316	460509	357182	431523	288129	292274
sp|P25228|RAB3_DROME	P25228	RAB3_DROME	Rab3	Ras-related protein Rab-3	216088	377101	245155	780572	307490	487281	360187	436329
sp|P25822|PUM_DROME	P25822	PUM_DROME	pum	Maternal protein pumilio	466227	371031	483081	332087	546609	371959	581730	366688
sp|P25823|TUD_DROME	P25823	TUD_DROME	tud	Maternal protein tudor	470695	368264	443157	349592	503370	403920	528424	426318
sp|P25867|UBCD1_DROME	P25867	UBCD1_DROME	eff	Ubiquitin-conjugating enzyme E2-17 kDa	409151	462036	441145	370828	381588	377512	419019	504351
sp|P25991|SUF_DROME	P25991	SUF_DROME	su(f)	Protein suppressor of forked	396054	431790	402142	420068	400146	450715	397377	480919
sp|P26019|DPOLA_DROME	P26019	DPOLA_DROME	DNApol-alpha180	DNA polymerase alpha catalytic subunit	135710	648368	193857	501726	154591	688425	152268	744279
sp|P26270|PSMD7_DROME	P26270	PSMD7_DROME	Rpn8	26S proteasome non-ATPase regulatory subunit 7	435226	422715	451686	391549	393000	387592	451772	449290
sp|P26675|SOS_DROME	P26675	SOS_DROME	Sos	Protein son of sevenless	447915	373194	494706	409092	488733	349998	502553	357126
sp|P26686|SRR55_DROME	P26686	SRR55_DROME	B52	Serine-arginine protein 55	437250	413274	374473	415044	438187	427223	427288	464694
sp|P26802|DDX51_DROME	P26802	DDX51_DROME	Dbp73D	Probable ATP-dependent RNA helicase Dbp73D	296689	497129	293449	482959	272506	562170	297137	602969
sp|P28668|SYEP_DROME	P28668	SYEP_DROME	Aats-glupro	Bifunctional glutamate/proline--tRNA ligase	482775	363654	481754	325751	524996	371376	556151	403217
sp|P29310-2|1433Z_DROME	P29310-2	1433Z_DROME	14-3-3zeta	Isoform VI' of 14-3-3 protein zeta	455425	416709	454904	375394	466907	400089	426572	412080
sp|P29310-3|1433Z_DROME	P29310-3	1433Z_DROME	14-3-3zeta	Isoform C of 14-3-3 protein zeta	567168	354954	522574	329845	511809	303471	522842	336692
sp|P29327|RS6_DROME	P29327	RS6_DROME	RpS6	40S ribosomal protein S6	536246	332336	590199	317844	524541	303044	518275	352485
sp|P29349|CSW_DROME	P29349	CSW_DROME	csw	Tyrosine-protein phosphatase corkscrew	455325	364714	477827	341526	528490	419261	518345	405216
sp|P29413|CALR_DROME	P29413	CALR_DROME	Crc	Calreticulin	373582	445535	395538	493819	354953	408939	376694	447515
sp|P29613|TPIS_DROME	P29613	TPIS_DROME	Tpi	Triosephosphate isomerase	623566	262376	639303	218760	753903	247123	605302	277161
sp|P29615|LYSP_DROME	P29615	LYSP_DROME	LysP	Lysozyme P	64617.8	947859	101313	644032	86125.8	910710	68807.9	170784
sp|P29742|CLH_DROME	P29742	CLH_DROME	Chc	Clathrin heavy chain	405608	421798	427141	450630	411368	410344	425426	406174
sp|P29843|HSP7A_DROME	P29843	HSP7A_DROME	Hsc70-1	Heat shock 70 kDa protein cognate 1	401253	353695	498312	389415	503828	428954	519527	399688
sp|P29844|HSP7C_DROME	P29844	HSP7C_DROME	Hsc70-3	Heat shock 70 kDa protein cognate 3	454410	412495	447675	420125	395485	369742	453274	407083
sp|P29845|HSP7E_DROME	P29845	HSP7E_DROME	Hsc70-5	Heat shock 70 kDa protein cognate 5	438372	330804	445528	360943	519020	408541	603053	439717
sp|P29993|ITPR_DROME	P29993	ITPR_DROME	Itp-r83A	Inositol 1,4,5-trisphosphate receptor	323102	483150	351655	555593	337119	440184	318155	428950
sp|P30430|FUR1C_DROME	P30430	FUR1C_DROME	Fur1	Furin-like protease 1, isoform 1-CRR	354662	431569	380420	450729	440380	473116	445575	428765
sp|P31396|HR3_DROME	P31396	HR3_DROME	Hr46	Probable nuclear hormone receptor HR3	849937	356203	385589	256752	402610	246095	492367	384900
sp|P32100|RL7_DROME	P32100	RL7_DROME	RpL7	60S ribosomal protein L7	529666	276886	581029	336150	538328	299352	648180	331199
sp|P32234|128UP_DROME	P32234	128UP_DROME	128up	GTP-binding protein 128up	434778	394940	434362	396684	418307	409353	456523	468254
sp|P32392|ARP3_DROME	P32392	ARP3_DROME	Arp3	Actin-related protein 3	411783	443120	399526	457374	400663	422662	365428	424295
sp|P32748|PYRD_DROME	P32748	PYRD_DROME	Dhod	Dihydroorotate dehydrogenase (quinone), mitochondrial	398062	413352	407505	433264	414936	435813	443161	447572
sp|P32866|GPRK2_DROME	P32866	GPRK2_DROME	Gprk2	G protein-coupled receptor kinase 2	416932	431558	397557	437119	428804	418466	438519	403920
sp|P33269|CP4D1_DROME	P33269	CP4D1_DROME	Cyp4d1	Cytochrome P450 4d1	151237	640556	184481	810008	70349.5	450490	93861.9	497436
sp|P33269-2|CP4D1_DROME	P33269-2	CP4D1_DROME	Cyp4d1	Isoform Short of Cytochrome P450 4d1	200039	602035	274783	737965	84306.6	407247	172848	482367
sp|P33270|CP6A2_DROME	P33270	CP6A2_DROME	Cyp6a2	Cytochrome P450 6a2	112278	643095	178030	755375	141425	571530	127900	482785
sp|P35220|CTNA_DROME	P35220	CTNA_DROME	alpha-Cat	Catenin alpha	478999	375623	454629	428669	437558	397238	445757	368309
sp|P35381|ATPA_DROME	P35381	ATPA_DROME	blw	ATP synthase subunit alpha, mitochondrial	434782	357130	463621	368076	554604	393978	591971	362320
sp|P35421|PUR4_DROME	P35421	PUR4_DROME	ade2	Phosphoribosylformylglycinamidine synthase	240492	525010	279481	642112	238700	493174	240326	491140
sp|P35600|RFC1_DROME	P35600	RFC1_DROME	Gnf1	Replication factor C subunit 1	474006	392175	444049	399511	461507	385970	474728	379142
sp|P35832|PTP99_DROME	P35832	PTP99_DROME	Ptp99A	Tyrosine-protein phosphatase 99A	479326	376249	417052	384502	546455	359409	527860	373056
sp|P35875|PARP_DROME	P35875	PARP_DROME	Parp	Poly [ADP-ribose] polymerase	242568	598881	242482	524121	216019	506196	217291	632216
sp|P36241|RL19_DROME	P36241	RL19_DROME	RpL19	60S ribosomal protein L19	573199	407858	593522	363458	449739	293534	440995	217978
sp|P36872|2ABA_DROME	P36872	2ABA_DROME	tws	Protein phosphatase PP2A 55 kDa regulatory subunit	451240	380257	438181	457726	460302	376259	395072	399744
sp|P36951|HYI_DROME	P36951	HYI_DROME	Gip	Putative hydroxypyruvate isomerase	362122	452945	399766	492157	431720	415698	429391	351534
sp|P36958|RPB9_DROME	P36958	RPB9_DROME	RpII15	DNA-directed RNA polymerase II subunit RPB9	429852	409616	446553	383882	440398	459613	407140	442541
sp|P37161|LYSX_DROME	P37161	LYSX_DROME	LysX	Lysozyme X	603286	244108	668148	217770	837447	246966	533925	292161
sp|P38040|GBG1_DROME	P38040	GBG1_DROME	Ggamma1	Guanine nucleotide-binding protein subunit gamma-1	478137	407244	504526	441058	355863	296682	450472	368474
sp|P38979|RSSA_DROME	P38979	RSSA_DROME	sta	40S ribosomal protein SA	504180	381879	511285	348470	499988	332612	490716	366444
sp|P39205|CIN_DROME	P39205	CIN_DROME	cin	Molybdenum cofactor synthesis protein cinnamon	434961	457367	384041	445278	367518	474467	344876	411096
sp|P39769|PHP_DROME	P39769	PHP_DROME	ph-p	Polyhomeotic-proximal chromatin protein	432100	408177	416566	419871	437692	445292	397765	433228
sp|P39770|SALM_DROME	P39770	SALM_DROME	salm	Homeotic protein spalt-major	632429	282231	595063	232087	638845	270497	598620	331761
sp|P40301|PSA2_DROME	P40301	PSA2_DROME	Prosalpha2	Proteasome subunit alpha type-2	462126	449015	425507	363216	537448	380627	389191	393396
sp|P40304|PSB1_DROME	P40304	PSB1_DROME	Prosbeta6	Proteasome subunit beta type-1	411789	444835	407617	417842	412914	405631	412236	449261
sp|P40320|METK_DROME	P40320	METK_DROME	Sam-S	S-adenosylmethionine synthase	612723	239402	697930	190618	718728	267410	715531	244496
sp|P40417|ERKA_DROME	P40417	ERKA_DROME	rl	Mitogen-activated protein kinase ERK-A	398196	416355	409671	432588	442737	431129	439642	426997
sp|P40423|SQH_DROME	P40423	SQH_DROME	sqh	Myosin regulatory light chain sqh	387187	488641	419188	492148	313644	438367	301549	399200
sp|P40791|MEF2_DROME	P40791	MEF2_DROME	Mef2	Myocyte-specific enhancer factor 2	595942	350855	406340	275106	581554	350475	544193	428653
sp|P40796|LA_DROME	P40796	LA_DROME	La	La protein homolog	324118	550140	287552	408857	302007	508375	296707	630017
sp|P40797|PNUT_DROME	P40797	PNUT_DROME	pnut	Protein peanut	505419	375221	454515	360743	455824	364653	516514	409175
sp|P40946|ARF3_DROME	P40946	ARF3_DROME	Arf51F	ADP-ribosylation factor 3	409883	403096	445218	457615	417824	436158	443871	363390
sp|P41042|RS4_DROME	P41042	RS4_DROME	RpS4	40S ribosomal protein S4	564713	356945	588982	315438	514173	299927	496537	306539
sp|P41044|CAB32_DROME	P41044	CAB32_DROME	Cbp53E	Calbindin-32	336624	349545	372241	756559	329582	405848	342300	278493
sp|P41093|RL18A_DROME	P41093	RL18A_DROME	RpL18A	60S ribosomal protein L18a	525228	307199	574210	303131	604270	305500	583596	344532
sp|P41094|RS18_DROME	P41094	RS18_DROME	RpS18	40S ribosomal protein S18	552082	314229	609412	304957	536021	277225	570434	334815
sp|P41374|IF2A_DROME	P41374	IF2A_DROME	eIF-2alpha	Eukaryotic translation initiation factor 2 subunit 1	402428	423175	431393	411012	392956	439080	418013	468260
sp|P41375|IF2B_DROME	P41375	IF2B_DROME	eIF-2beta	Eukaryotic translation initiation factor 2 subunit 2	365330	425503	349332	461173	353602	467418	435376	515332
sp|P41572|6PGD_DROME	P41572	6PGD_DROME	Pgd	6-phosphogluconate dehydrogenase, decarboxylating	241584	501477	334675	651410	244224	496024	222577	457295
sp|P41900|T2FB_DROME	P41900	T2FB_DROME	TfIIFbeta	General transcription factor IIF subunit 2	355086	501961	342763	491944	328483	484246	306059	458154
sp|P42207|SEPT1_DROME	P42207	SEPT1_DROME	42614	Septin-1	476882	400724	399162	367498	446061	366348	507548	467002
sp|P42787-3|CBPD_DROME	P42787-3	CBPD_DROME	svr	Isoform 3 of Carboxypeptidase D	357887	506711	336666	518802	277000	442715	312614	470121
sp|P42787-5|CBPD_DROME	P42787-5	CBPD_DROME	svr	Isoform 5 of Carboxypeptidase D	356514	458579	281047	563582	264207	444289	349314	518017
sp|P43332|SNRPA_DROME	P43332	SNRPA_DROME	snf	U1 small nuclear ribonucleoprotein A	413191	465866	392450	399770	455496	446640	385016	420485
sp|P45437|COPB_DROME	P45437	COPB_DROME	betaCop	Coatomer subunit beta	401083	444683	445991	477503	380989	383779	366131	391215
sp|P45594|CADF_DROME	P45594	CADF_DROME	tsr	Cofilin/actin-depolymerizing factor homolog	449504	468963	420579	374484	437867	395252	342330	458536
sp|P45888|ARP2_DROME	P45888	ARP2_DROME	Arp2	Actin-related protein 2	372748	427718	383997	475756	373607	501626	385271	436114
sp|P45889|ACTZ_DROME	P45889	ACTZ_DROME	Arp1	Actin-related protein 1	489024	389258	497224	364292	467327	366007	485778	366792
sp|P45891|ACTY_DROME	P45891	ACTY_DROME	Arp53D	Actin-like protein 53D	189173	516027	236663	546019	246209	659803	256895	646986
sp|P45975|SUV39_DROME	P45975	SUV39_DROME	Su(var)3-9	Histone-lysine N-methyltransferase Su(var)3-9	405857	430074	391155	415349	399997	444988	397027	495479
sp|P46222|RL11_DROME	P46222	RL11_DROME	RpL11	60S ribosomal protein L11	501076	299767	557702	308452	592562	323275	614791	371117
sp|P46223|RL7A_DROME	P46223	RL7A_DROME	RpL7A	60S ribosomal protein L7a	561750	317975	568350	322297	535817	274295	552540	347378
sp|P46415|ADHX_DROME	P46415	ADHX_DROME	Fdh	Alcohol dehydrogenase class-3	397556	526088	358807	471544	317271	415638	315295	430737
sp|P47947|TNNC1_DROME	P47947	TNNC1_DROME	TpnC41C	Troponin C, isoform 1	707234	311821	689442	269873	731826	232862	274827	205758
sp|P47948|TNNC2_DROME	P47948	TNNC2_DROME	TpnC47D	Troponin C, isoform 2	505399	834714	347087	357313	370278	210012	193540	191407
sp|P47949|TNNC3_DROME	P47949	TNNC3_DROME	TpnC73F	Troponin C, isoform 3	432061	547118	529932	517589	252094	272248	200142	313580
sp|P48159|RL23_DROME	P48159	RL23_DROME	RpL23	60S ribosomal protein L23	529786	319959	580580	320096	510600	310454	590070	342201
sp|P48375|FKB12_DROME	P48375	FKB12_DROME	FK506-bp2	12 kDa FK506-binding protein	485641	370504	465628	388728	497479	354312	462261	398083
sp|P48456|PP2B1_DROME	P48456	PP2B1_DROME	CanA1	Serine/threonine-protein phosphatase 2B catalytic subunit 1	592169	255223	645887	253489	751127	302651	577662	246056
sp|P48461|PP11_DROME	P48461	PP11_DROME	Pp1alpha-96A	Serine/threonine-protein phosphatase alpha-1 isoform	347211	422735	371302	441520	378018	642458	402580	434880
sp|P48555|RALA_DROME	P48555	RALA_DROME	Rala	Ras-related protein Ral-a	427821	391897	438855	458794	408481	373671	456275	405039
sp|P48588|RS25_DROME	P48588	RS25_DROME	RpS25	40S ribosomal protein S25	551846	323346	571229	323673	490108	319418	568526	336279
sp|P48591|RIR1_DROME	P48591	RIR1_DROME	RnrL	Ribonucleoside-diphosphate reductase large subunit	212796	640481	210931	476450	210089	620514	197132	657221
sp|P48596|GCH1_DROME	P48596	GCH1_DROME	Pu	GTP cyclohydrolase 1	300955	555710	374874	634316	276275	334786	237738	356825
sp|P48601|PRS4_DROME	P48601	PRS4_DROME	Rpt2	26S protease regulatory subunit 4	429461	458484	419309	429375	407304	371112	406505	404441
sp|P48604|GRPE_DROME	P48604	GRPE_DROME	Roe1	GrpE protein homolog, mitochondrial	477717	355515	468391	357825	513526	404914	527560	388591
sp|P48607-5|SPZ_DROME	P48607-5	SPZ_DROME	spz	Isoform 8.29 of Protein spaetzle	401086	420608	488976	425379	513809	305048	455935	366202
sp|P48609|CDK5_DROME	P48609	CDK5_DROME	Cdk5	Cyclin-dependent kinase 5 homolog	443476	369905	459542	383660	491434	387212	507293	418475
sp|P48610-2|KARG_DROME	P48610-2	KARG_DROME	Argk	Isoform A of Arginine kinase	546548	325000	532949	279343	556282	311361	638727	366017
sp|P48611|PTPS_DROME	P48611	PTPS_DROME	pr	6-pyruvoyl tetrahydrobiopterin synthase	339607	519704	324399	463397	340067	476353	319805	505377
sp|P48612|PELO_DROME	P48612	PELO_DROME	pelo	Protein pelota	429395	401782	428316	408838	476813	414977	443449	413503
sp|P49028|MGN_DROME	P49028	MGN_DROME	mago	Protein mago nashi	462023	426564	437171	353228	459330	427805	400298	449074
sp|P49455|TPM4_DROME	P49455	TPM4_DROME	Tm1	Tropomyosin-1, isoforms 33/34	565465	270448	675509	262542	619280	338955	541175	303283
sp|P49455-2|TPM4_DROME	P49455-2	TPM4_DROME	Tm1	Isoform 34 of Tropomyosin-1, isoforms 33/34	454831	365520	535035	343957	535359	442224	448672	364928
sp|P49630|RL36_DROME	P49630	RL36_DROME	RpL36	60S ribosomal protein L36	517538	303347	550036	314354	489917	333552	613529	410472
sp|P49657|MNB_DROME	P49657	MNB_DROME	mnb	Serine/threonine-protein kinase minibrain	430778	474495	411448	403476	355875	471057	345171	439400
sp|P49735|MCM2_DROME	P49735	MCM2_DROME	Mcm2	DNA replication licensing factor Mcm2	349353	524116	316936	458751	358150	567778	355002	400276
sp|P49846|TAF5_DROME	P49846	TAF5_DROME	Taf5	Transcription initiation factor TFIID subunit 5	440159	397163	458356	395736	459826	439370	396260	424047
sp|P49847|TAF6_DROME	P49847	TAF6_DROME	Taf6	Transcription initiation factor TFIID subunit 6	526238	441362	502892	388942	481578	435541	354025	220840
sp|P49906|TAF11_DROME	P49906	TAF11_DROME	Taf11	Transcription initiation factor TFIID subunit 11	568932	323042	471311	370977	473906	438360	380315	406176
sp|P49963|SRP19_DROME	P49963	SRP19_DROME	Srp19	Signal recognition particle 19 kDa protein	452082	454280	434622	436425	367967	330808	414644	404106
sp|P50245|SAHH2_DROME	P50245	SAHH2_DROME	Ahcy89E	Putative adenosylhomocysteinase 2	342042	358397	418522	480285	394441	521376	469215	453663
sp|P50882|RL9_DROME	P50882	RL9_DROME	RpL9	60S ribosomal protein L9	539053	287829	587264	311579	564520	322720	602568	332581
sp|P50887|RL22_DROME	P50887	RL22_DROME	RpL22	60S ribosomal protein L22	545069	280438	550018	311355	529201	317302	631068	387610
sp|P51406|BYS_DROME	P51406	BYS_DROME	bys	Bystin	267651	518191	284778	474860	241850	570345	275313	661397
sp|P51592|HYD_DROME	P51592	HYD_DROME	hyd	E3 ubiquitin-protein ligase hyd	420357	467264	392253	406281	367383	436268	393449	463190
sp|P52029|G6PI_DROME	P52029	G6PI_DROME	Pgi	Glucose-6-phosphate isomerase	641081	279725	668551	242402	616920	241744	617519	248688
sp|P52034|K6PF_DROME	P52034	K6PF_DROME	Pfk	6-phosphofructokinase	537888	246265	706512	252995	762110	230877	713847	211050
sp|P52304|POLO_DROME	P52304	POLO_DROME	polo	Serine/threonine-protein kinase polo	251528	564348	247084	456015	344184	542912	336723	583763
sp|P52485|UBCD2_DROME	P52485	UBCD2_DROME	UbcD2	Ubiquitin-conjugating enzyme E2-24 kDa	347289	462952	352969	414528	374465	501823	390120	545287
sp|P52486|UBCD4_DROME	P52486	UBCD4_DROME	UbcD4	Ubiquitin-conjugating enzyme E2-22 kDa	549694	374684	517076	342091	509897	321309	465979	341732
sp|P52656|T2AG_DROME	P52656	T2AG_DROME	TfIIA-S	Transcription initiation factor IIA subunit 2	449626	426084	426419	375188	460783	419123	404566	442869
sp|P53034|RFC2_DROME	P53034	RFC2_DROME	RfC4	Replication factor C subunit 2	413188	454420	428644	409775	396982	411862	416812	426279
sp|P53624|MA121_DROME	P53624	MA121_DROME	alpha-Man-I	Mannosyl-oligosaccharide alpha-1,2-mannosidase isoform A	442996	400530	361101	438419	396409	457427	418916	468208
sp|P53777|MLP1_DROME	P53777	MLP1_DROME	Mlp60A	Muscle LIM protein 1	558680	393753	525404	573242	326449	220863	288400	228932
sp|P53997|SET_DROME	P53997	SET_DROME	Set	Protein SET	596265	348517	508750	316837	484216	310277	507719	372417
sp|P54351|NSF2_DROME	P54351	NSF2_DROME	Nsf2	Vesicle-fusing ATPase 2	391488	415799	404436	479233	439523	417659	413308	394161
sp|P54352-2|EAS_DROME	P54352-2	EAS_DROME	eas	Isoform A of Ethanolamine kinase	243475	532225	345757	605211	242609	527369	227273	446759
sp|P54353|DOD_DROME	P54353	DOD_DROME	dod	Putative peptidyl-prolyl cis-trans isomerase dodo	433146	403151	456008	391716	452942	384060	452545	437027
sp|P54358|DPOD1_DROME	P54358	DPOD1_DROME	DNApol-delta	DNA polymerase delta catalytic subunit	208222	604048	218028	493332	228373	612796	257252	635583
sp|P54359|SEPT2_DROME	P54359	SEPT2_DROME	42615	Septin-2	488254	359070	455697	368980	449325	358402	559109	421345
sp|P54361|OAZ_DROME	P54361	OAZ_DROME	Oda	Ornithine decarboxylase antizyme	449523	371431	430841	465885	445579	453942	407829	357994
sp|P54362|AP3D_DROME	P54362	AP3D_DROME	g	AP-3 complex subunit delta	402243	412438	394603	448967	402671	414559	421439	470453
sp|P54385|DHE3_DROME	P54385	DHE3_DROME	Gdh	Glutamate dehydrogenase, mitochondrial	439691	335046	486784	357708	511959	410531	612906	387796
sp|P54397|FKB39_DROME	P54397	FKB39_DROME	FK506-bp1	39 kDa FK506-binding nuclear protein	262632	534924	284223	505338	260085	585479	254342	581380
sp|P54398|FBP2_DROME	P54398	FBP2_DROME	Fbp2	Fat body protein 2	194592	555456	265063	676012	200942	562410	142410	507771
sp|P54399|PDI_DROME	P54399	PDI_DROME	Pdi	Protein disulfide-isomerase	350662	475305	351321	555567	289628	422643	326179	447356
sp|P54611|VATE_DROME	P54611	VATE_DROME	Vha26	V-type proton ATPase subunit E	356694	456734	444651	481905	378963	455276	373783	369298
sp|P54622|SSBP_DROME	P54622	SSBP_DROME	mtSSB	Single-stranded DNA-binding protein, mitochondrial	455161	406123	475631	424588	410064	351625	447054	384416
sp|P55162|HEM_DROME	P55162	HEM_DROME	Hem	Membrane-associated protein Hem	414545	398924	400695	443786	413520	429451	444903	443633
sp|P55824|FAF_DROME	P55824	FAF_DROME	faf	Probable ubiquitin carboxyl-terminal hydrolase FAF	452750	412898	464602	366685	496123	383247	459662	393080
sp|P55828|RS20_DROME	P55828	RS20_DROME	RpS20	40S ribosomal protein S20	525032	330884	545142	334248	523466	299943	578418	352442
sp|P55830|RS3A_DROME	P55830	RS3A_DROME	RpS3A	40S ribosomal protein S3a	554841	301282	590254	296446	547910	290052	619921	335391
sp|P55841|RL14_DROME	P55841	RL14_DROME	RpL14	60S ribosomal protein L14	530021	309490	554934	314568	562901	312328	604828	347019
sp|P55935|RS9_DROME	P55935	RS9_DROME	RpS9	40S ribosomal protein S9	545925	327491	622772	303474	489701	254159	590854	344382
sp|P56079|CDSA_DROME	P56079	CDSA_DROME	CdsA	Phosphatidate cytidylyltransferase, photoreceptor-specific	382458	440328	390939	471166	390780	430802	414837	419774
sp|P56175|RCL1_DROME	P56175	RCL1_DROME	Rtc1	Probable RNA 3'-terminal phosphate cyclase-like protein	240334	587906	230718	518263	214771	560723	212029	642072
sp|P56538|IF6_DROME	P56538	IF6_DROME	eIF6	Eukaryotic translation initiation factor 6	306562	507268	301831	477918	248280	507497	296398	629328
sp|P61851|SODC_DROME	P61851	SODC_DROME	Sod	Superoxide dismutase [Cu-Zn]	454127	408174	463747	393413	459505	384514	440830	393667
sp|P61855|AKH_DROME	P61855	AKH_DROME	Akh	Adipokinetic hormone	615833	834261	364503	247433	243305	219199	332553	203004
sp|P61857|TBB2_DROME	P61857	TBB2_DROME	betaTub85D	Tubulin beta-2 chain	454272	374226	427134	387598	537678	437781	434235	409312
sp|P62152|CALM_DROME	P62152	CALM_DROME	Cam	Calmodulin	537954	425552	516417	379999	371748	291442	467285	331815
sp|P80455|RS12_DROME	P80455	RS12_DROME	RpS12	40S ribosomal protein S12	535465	314161	558596	335908	537094	303428	566951	343952
sp|P81900|KAPR2_DROME	P81900	KAPR2_DROME	Pka-R2	cAMP-dependent protein kinase type II regulatory subunit	494629	318028	553638	348827	554805	350260	556263	336128
sp|P81928|140U_DROME	P81928	140U_DROME	140up	RPII140-upstream gene protein	432161	478289	407590	379767	422236	440511	373861	429001
sp|P82147|L2EFL_DROME	P82147	L2EFL_DROME	l(2)efl	Protein lethal(2)essential for life	180543	950004	219944	633143	126011	330355	118404	246923
sp|P82712|CCD1P_DROME	P82712	CCD1P_DROME	Cyp12d1-p	Probable cytochrome P450 12d1 proximal, mitochondrial	256912	428857	452171	674034	351413	435094	360722	254820
sp|P82713|CP392_DROME	P82713	CP392_DROME	Cyp309a2	Probable cytochrome P450 309a2	312870	417420	332120	622680	287198	456110	457927	383794
sp|P82804|WIBG_DROME	P82804	WIBG_DROME	wibg	Partner of Y14 and mago	478847	389735	511439	349386	434618	363498	507594	398513
sp|P82890|PPAC1_DROME	P82890	PPAC1_DROME	primo-1	Low molecular weight phosphotyrosine protein phosphatase 1	448421	400777	478118	373589	451789	380491	473091	416084
sp|P83094|STIM_DROME	P83094	STIM_DROME	Stim	Stromal interaction molecule homolog	354475	455729	388626	419109	414860	483168	418914	464241
sp|P83098|STLK_DROME	P83098	STLK_DROME	Stlk	Putative serine/threonine-protein kinase STE20-like	387065	408555	313137	565428	402941	354282	420418	433475
sp|P83100|MK14C_DROME	P83100	MK14C_DROME	p38c	Putative mitogen-activated protein kinase 14C	295715	463542	422895	575197	335784	358811	335748	429474
sp|P83102|DYRK3_DROME	P83102	DYRK3_DROME	Dyrk3	Putative dual specificity tyrosine-phosphorylation-regulated kinase 3 homolog	475933	389201	456561	422922	441793	315361	532410	351470
sp|P83501|MSTAB_DROME	P83501	MSTAB_DROME	msta	Protein msta, isoform B	561426	368716	478303	278653	527950	342228	571352	384265
sp|P83967|ACT6_DROME	P83967	ACT6_DROME	Act88F	Actin, indirect flight muscle	500284	310702	535271	339586	608301	389886	515306	338845
sp|P84029|CYC2_DROME	P84029	CYC2_DROME	Cyt-c-p	Cytochrome c-2	504911	280807	617067	307697	598368	287620	697416	295128
sp|P84040|H4_DROME	P84040	H4_DROME	His4	Histone H4	518506	366476	555326	364670	506350	351702	385813	352271
sp|P84051|H2A_DROME	P84051	H2A_DROME	His2A	Histone H2A	478552	446073	501362	193273	525910	980939	283642	241229
sp|P84345|ATP8_DROME	P84345	ATP8_DROME	mt:ATPase8	ATP synthase protein 8	595579	320021	595570	334810	513617	256638	553493	277069
sp|P91660|L259_DROME	P91660	L259_DROME	l(2)03659	Probable multidrug resistance-associated protein lethal(2)03659	378971	452415	482284	418873	439027	433249	374454	383319
sp|P91679|PEPT1_DROME	P91679	PEPT1_DROME	yin	Peptide transporter family 1	335552	420077	415377	515606	280353	406695	459642	476205
sp|P91875|RPA1_DROME	P91875	RPA1_DROME	RpI1	DNA-directed RNA polymerase I subunit RPA1	231624	565435	238469	503877	214650	610506	223947	661939
sp|P91926|AP2A_DROME	P91926	AP2A_DROME	AP-2alpha	AP-2 complex subunit alpha	401423	377867	411366	439599	468065	423210	490627	422612
sp|P91927|A60DA_DROME	P91927	A60DA_DROME	Letm1	LETM1 and EF-hand domain-containing protein anon-60Da, mitochondrial	423562	334862	495706	385551	555315	390089	566235	367909
sp|P91928|IMMT_DROME	P91928	IMMT_DROME	CG6455	Putative mitochondrial inner membrane protein	468442	342214	510751	340294	522780	375366	579893	381818
sp|P91931|DCAM_DROME	P91931	DCAM_DROME	SamDC	S-adenosylmethionine decarboxylase proenzyme	359587	463383	371608	497449	346166	511426	358067	405044
sp|P91938|TRXR1_DROME	P91938	TRXR1_DROME	Trxr-1	Thioredoxin reductase 1, mitochondrial	499972	394727	517193	380060	440065	340387	459022	351614
sp|P92029|DNJ60_DROME	P92029	DNJ60_DROME	DnaJ-60	DnaJ-like protein 60	375429	373155	437659	405281	477558	450802	518166	446803
sp|P92177|1433E_DROME	P92177	1433E_DROME	14-3-3epsilon	14-3-3 protein epsilon	382046	476240	360540	501176	354103	415987	334270	439034
sp|P92201|LCP8_DROME	P92201	LCP8_DROME	Lcp65Ag1	Larval cuticle protein 8	254328	450547	200399	1.27167e+06	115627	112378	97441.1	78162.1
sp|P92204|NELFE_DROME	P92204	NELFE_DROME	Nelf-E	Negative elongation factor E	458337	391440	443740	402582	458465	436138	418446	402220
sp|Q00174|LAMA_DROME	Q00174	LAMA_DROME	LanA	Laminin subunit alpha	433999	421320	450536	405838	418900	444792	399202	408542
sp|Q00449|MDR49_DROME	Q00449	MDR49_DROME	Mdr49	Multidrug resistance protein homolog 49	270153	497905	268711	647432	253856	458089	269221	492818
sp|Q00637|SODM_DROME	Q00637	SODM_DROME	Sod2	Superoxide dismutase [Mn], mitochondrial	522688	318536	559569	334841	538811	312034	627237	304675
sp|Q00748|MDR65_DROME	Q00748	MDR65_DROME	Mdr65	Multidrug resistance protein homolog 65	397181	420835	376200	457274	350970	511626	403594	451877
sp|Q01637|UMPS_DROME	Q01637	UMPS_DROME	r-l	Uridine 5'-monophosphate synthase	454631	509642	456778	388876	306495	346956	345259	448806
sp|Q01989|MYS9_DROME	Q01989	MYS9_DROME	jar	Myosin heavy chain 95F	382305	483337	400025	545348	306450	436351	285414	363778
sp|Q02645-2|HTS_DROME	Q02645-2	HTS_DROME	hts	Isoform B of Protein hu-li tai shao	439858	430823	439511	425719	393553	421505	372310	417909
sp|Q02645-3|HTS_DROME	Q02645-3	HTS_DROME	hts	Isoform C of Protein hu-li tai shao	489751	357291	467298	425753	475652	384512	497048	320318
sp|Q02910|CPN_DROME	Q02910	CPN_DROME	Cpn	Calphotin	51757.4	1.04377e+06	95225.7	717412	98429.3	368434	45349.2	303113
sp|Q03042|KGP1_DROME	Q03042	KGP1_DROME	Pkg21D	cGMP-dependent protein kinase, isozyme 1	355381	476662	392996	473165	359998	436752	360331	446831
sp|Q03043|KGP24_DROME	Q03043	KGP24_DROME	for	cGMP-dependent protein kinase, isozyme 2 forms cD4/T1/T3A/T3B	417608	460027	404265	412777	446427	433944	388311	402369
sp|Q03334|RS13_DROME	Q03334	RS13_DROME	RpS13	40S ribosomal protein S13	559782	313498	574681	312156	548881	281034	572321	339158
sp|Q03427|LAMC_DROME	Q03427	LAMC_DROME	LamC	Lamin-C	393134	449419	425573	465670	404701	461356	355584	372398
sp|Q03720|SLO_DROME	Q03720	SLO_DROME	slo	Calcium-activated potassium channel slowpoke	443774	431067	422295	408606	447483	394907	448407	386700
sp|Q04047|NONA_DROME	Q04047	NONA_DROME	nonA	Protein no-on-transient A	460272	416900	487452	386622	444338	402048	383001	396056
sp|Q04164|SAS_DROME	Q04164	SAS_DROME	sas	Putative epidermal cell surface receptor	479237	383278	462386	397812	449461	381273	476841	379750
sp|Q04448|MTDC_DROME	Q04448	MTDC_DROME	Nmdmc	Bifunctional methylenetetrahydrofolate dehydrogenase/cyclohydrolase, mitochondrial	383233	454790	411887	425619	410256	459511	415988	413932
sp|Q04688|ELG_DROME	Q04688	ELG_DROME	Ets97D	DNA-binding protein Ets97D	405617	437382	435195	425436	362016	435734	359035	478822
sp|Q04691|FBP1_DROME	Q04691	FBP1_DROME	Fbp1	Fat-body protein 1	153721	682856	160281	715772	83974.5	534016	95574.5	541916
sp|Q05344|SSRP1_DROME	Q05344	SSRP1_DROME	Ssrp	FACT complex subunit Ssrp1	298400	575693	297593	522100	238336	515200	227079	510732
sp|Q05913|T2FA_DROME	Q05913	T2FA_DROME	TfIIFalpha	General transcription factor IIF subunit 1	353162	489590	329356	479626	327811	493646	360585	471791
sp|Q06559|RS3_DROME	Q06559	RS3_DROME	RpS3	40S ribosomal protein S3	546422	342937	561597	330454	484284	312686	531978	345541
sp|Q06943|HMGZ_DROME	Q06943	HMGZ_DROME	HmgZ	High mobility group protein Z	856742	355458	596398	368476	277697	242267	306457	179333
sp|Q07171|GELS_DROME	Q07171	GELS_DROME	Gel	Gelsolin	305623	532220	338752	553725	315088	436977	251983	454480
sp|Q07407|FGFR1_DROME	Q07407	FGFR1_DROME	htl	Fibroblast growth factor receptor homolog 1	563011	372594	457762	324159	642636	295758	534411	297908
sp|Q07886|DDX49_DROME	Q07886	DDX49_DROME	Dbp45A	Probable ATP-dependent RNA helicase Dbp45A	212685	590044	211176	532953	185843	587136	221956	666681
sp|Q08012|DRK_DROME	Q08012	DRK_DROME	drk	Protein enhancer of sevenless 2B	489235	443874	460221	406076	429053	383091	291320	401293
sp|Q08473|SQD_DROME	Q08473	SQD_DROME	sqd	RNA-binding protein squid	442835	406736	405804	399818	414590	412345	462819	461451
sp|Q09147|FGFR2_DROME	Q09147	FGFR2_DROME	btl	Fibroblast growth factor receptor homolog 2	693956	335690	463105	270460	463822	310347	566913	368803
sp|Q09332|UGGG_DROME	Q09332	UGGG_DROME	Ugt	UDP-glucose:glycoprotein glucosyltransferase	413046	419490	399309	452473	388428	426713	415214	440257
sp|Q0E9B6|RS11_DROME	Q0E9B6	RS11_DROME	RpS11	40S ribosomal protein S11	357510	529014	400118	472063	316017	412808	273233	463343
sp|Q0E9G3|KTU_DROME	Q0E9G3	KTU_DROME	Nop17l	Protein kintoun	745114	264368	499145	258851	686320	308141	531407	262995
sp|Q0KHT7|DAPKR_DROME	Q0KHT7	DAPKR_DROME	Drak	Death-associated protein kinase related	416680	465708	345882	455824	354868	478720	371831	433057
sp|Q0KHU5|PCAT1_DROME	Q0KHU5	PCAT1_DROME	CG32699	1-acylglycerophosphocholine O-acyltransferase 1	336035	506049	346923	415394	357616	514960	433336	468536
sp|Q0KHY3|MESH_DROME	Q0KHY3	MESH_DROME	mesh	Protein mesh	220886	613936	421071	972956	128239	121012	113041	90093.4
sp|Q0KI50|DMDD_DROME	Q0KI50	DMDD_DROME	Dys	Dystrophin, isoform D	486630	367849	448612	357386	447181	438970	491629	429123
sp|Q10714|ACE_DROME	Q10714	ACE_DROME	Ance	Angiotensin-converting enzyme	326372	377105	476880	490742	515656	383569	368815	440734
sp|Q1LZ08|WDR48_DROME	Q1LZ08	WDR48_DROME	CG9062	WD repeat-containing protein 48 homolog	432631	408208	428293	414099	448190	421294	490439	373567
sp|Q23976|KU70_DROME	Q23976	KU70_DROME	Irbp	ATP-dependent DNA helicase 2 subunit 1	214360	587498	227662	525002	243314	564029	284670	594537
sp|Q23979|MY61F_DROME	Q23979	MY61F_DROME	Myo61F	Myosin-IB	409576	410415	459822	409604	448546	403214	432489	425289
sp|Q23983|SNAP_DROME	Q23983	SNAP_DROME	Snap	Soluble NSF attachment protein	395242	380683	382352	530347	431401	403464	417083	397485
sp|Q23997|C5210_DROME	Q23997	C5210_DROME	CG5210	Chitinase-like protein CG5210	322936	562826	371281	553545	285108	411365	268465	375309
sp|Q24020|FLII_DROME	Q24020	FLII_DROME	fliI	Protein flightless-1	541749	430351	509766	411790	406050	345490	344509	296609
sp|Q24114|DALY_DROME	Q24114	DALY_DROME	dally	Division abnormally delayed protein	407785	352887	481515	359827	586173	398257	497964	437966
sp|Q24133|DNAJ1_DROME	Q24133	DNAJ1_DROME	DnaJ-1	DnaJ protein homolog 1	449699	358958	486769	425883	462787	400724	483348	355007
sp|Q24134|NELFD_DROME	Q24134	NELFD_DROME	TH1	Negative elongation factor D	449634	403310	438428	398981	421792	477198	453613	379457
sp|Q24143|HR96_DROME	Q24143	HR96_DROME	Hr96	Nuclear hormone receptor HR96	364511	457616	377876	380428	441073	399479	479096	522561
sp|Q24145|SHARK_DROME	Q24145	SHARK_DROME	shark	Tyrosine-protein kinase shark	452781	399523	457958	383386	464748	407781	463725	396487
sp|Q24151-2|STAT_DROME	Q24151-2	STAT_DROME	Stat92E	Isoform C of Signal transducer and transcription activator	469184	421115	454970	392527	466623	364056	441748	373198
sp|Q24157|BRN_DROME	Q24157	BRN_DROME	brn	Beta-1,3-galactosyltransferase brn	385268	482999	386019	469196	290490	544804	445104	327900
sp|Q24179|SLY1_DROME	Q24179	SLY1_DROME	Slh	Protein sly1 homolog	366515	451746	383746	450916	375063	475100	406515	450142
sp|Q24185|HOOK_DROME	Q24185	HOOK_DROME	hk	Protein hook	419842	414517	412734	388892	456017	440172	441314	454976
sp|Q24186|RS5A_DROME	Q24186	RS5A_DROME	RpS5a	40S ribosomal protein S5a	514191	339350	530268	326244	540428	333952	565300	355893
sp|Q24192|RHOL_DROME	Q24192	RHOL_DROME	RhoL	Ras-like GTP-binding protein RhoL	355741	456754	378912	508961	344437	473362	344784	430362
sp|Q24208|IF2G_DROME	Q24208	IF2G_DROME	eIF-2gamma	Eukaryotic translation initiation factor 2 subunit 3	384135	446720	408933	436158	368283	431784	398110	473450
sp|Q24210|CSKP_DROME	Q24210	CSKP_DROME	CASK	Peripheral plasma membrane protein CASK	310395	386800	367686	621066	385583	429374	408545	381786
sp|Q24212|STNB_DROME	Q24212	STNB_DROME	stnB	Protein stoned-B	222772	324196	233558	824261	272620	498816	362355	467760
sp|Q24214|CANB2_DROME	Q24214	CANB2_DROME	CanB2	Calcineurin subunit B type 2	698175	315602	661326	284815	560273	248056	397084	244964
sp|Q24238|APH4_DROME	Q24238	APH4_DROME	Aph-4	Alkaline phosphatase 4	303076	266398	448818	603562	335217	514937	548745	402714
sp|Q24247|ITA1_DROME	Q24247	ITA1_DROME	mew	Integrin alpha-PS1	423806	408142	410321	451467	409551	427891	417350	416579
sp|Q24251|ATP5H_DROME	Q24251	ATP5H_DROME	ATPsyn-d	ATP synthase subunit d, mitochondrial	443337	330017	488107	353371	563063	373312	626545	376590
sp|Q24276|CDC37_DROME	Q24276	CDC37_DROME	Cdc37	Hsp90 co-chaperone Cdc37	505043	332141	505487	338608	528719	352775	553502	389468
sp|Q24297|RUXF_DROME	Q24297	RUXF_DROME	SmF	Small nuclear ribonucleoprotein F	459552	382112	476199	358567	514496	414710	510831	363545
sp|Q24298|CADE_DROME	Q24298	CADE_DROME	shg	DE-cadherin	471055	463049	367477	463657	394097	376870	304740	420024
sp|Q24307|IAP2_DROME	Q24307	IAP2_DROME	Iap2	Apoptosis 2 inhibitor	500073	363483	497639	301496	558678	369348	555358	382034
sp|Q24311|CUL1_DROME	Q24311	CUL1_DROME	lin19	Cullin homolog 1	480921	371500	460760	370415	476445	396396	483212	409815
sp|Q24314|VPS18_DROME	Q24314	VPS18_DROME	dor	Vacuolar protein sorting-associated protein 18 homolog	425862	416061	428820	412237	411203	407233	458370	431145
sp|Q24318|TFDP_DROME	Q24318	TFDP_DROME	Dp	Transcription factor Dp	593028	288641	616201	300715	591809	291619	553253	284517
sp|Q24319|OST48_DROME	Q24319	OST48_DROME	Ost48	Dolichyl-diphosphooligosaccharide--protein glycosyltransferase 48 kDa subunit	391397	465970	411761	456737	361352	408108	381597	428586
sp|Q24323|SEM2A_DROME	Q24323	SEM2A_DROME	Sema-2a	Semaphorin-2A	439156	435175	422995	424246	388330	450662	413081	387449
sp|Q24324|DSOR1_DROME	Q24324	DSOR1_DROME	Dsor1	Dual specificity mitogen-activated protein kinase kinase dSOR1	411840	436472	369420	439521	449845	441249	404978	422061
sp|Q24368|ISWI_DROME	Q24368	ISWI_DROME	Iswi	Chromatin-remodeling complex ATPase chain Iswi	444814	436989	420533	400685	401557	448401	358503	449751
sp|Q24372|LACH_DROME	Q24372	LACH_DROME	Lac	Lachesin	402832	393701	396616	463628	405122	436491	433694	447293
sp|Q24388|LSP2_DROME	Q24388	LSP2_DROME	Lsp2	Larval serum protein 2	428585	472057	494093	502488	338170	300509	315149	341357
sp|Q24407|ATP5J_DROME	Q24407	ATP5J_DROME	ATPsyn-Cf6	ATP synthase-coupling factor 6, mitochondrial	625540	350241	617462	311860	481254	249473	524117	253142
sp|Q24423|NOC_DROME	Q24423	NOC_DROME	noc	Zinc finger protein Noc	413923	323736	472181	295384	672926	458950	563266	444762
sp|Q24439|ATPO_DROME	Q24439	ATPO_DROME	Oscp	ATP synthase subunit O, mitochondrial	452225	353388	480592	360978	534511	371635	580882	376855
sp|Q24451|MAN2_DROME	Q24451	MAN2_DROME	alpha-Man-II	Alpha-mannosidase 2	470232	392133	440676	419171	418054	378829	448268	409635
sp|Q24472|RBF_DROME	Q24472	RBF_DROME	Rbf	Retinoblastoma family protein	514209	332600	548576	308003	542592	374427	568473	345029
sp|Q24478|CP190_DROME	Q24478	CP190_DROME	Cp190	Centrosome-associated zinc finger protein CP190	491218	375156	466579	408295	465449	375516	392050	406932
sp|Q24491|RX21_DROME	Q24491	RX21_DROME	Rsf1	RNA-binding protein Rsf1	554611	359680	513186	326489	480738	298156	515499	392555
sp|Q24492|RFA1_DROME	Q24492	RFA1_DROME	RpA-70	Replication protein A 70 kDa DNA-binding subunit	286649	577600	284628	472517	256511	523273	271317	570697
sp|Q24498-3|RY44_DROME	Q24498-3	RY44_DROME	Rya-r44F	Isoform B of Ryanodine receptor 44F	560101	298074	558319	284344	643837	309633	606838	315712
sp|Q24522|BUN1_DROME	Q24522	BUN1_DROME	bun	Protein bunched, class 1/class 3/D/E isoforms	431597	406525	388601	413716	428910	426882	435294	470742
sp|Q24523|BUN2_DROME	Q24523	BUN2_DROME	bun	Protein bunched, class 2/F/G isoform	427470	424277	433056	502312	361741	379029	391916	361827
sp|Q24535|SRF_DROME	Q24535	SRF_DROME	bs	Serum response factor homolog	627293	323810	537647	287420	503841	327246	470828	389351
sp|Q24547|STX1A_DROME	Q24547	STX1A_DROME	Syx1A	Syntaxin-1A	367798	324212	346905	587145	421173	413695	458790	438457
sp|Q24560|TBB1_DROME	Q24560	TBB1_DROME	betaTub56D	Tubulin beta-1 chain	505549	388618	457633	388706	458888	400890	406186	386756
sp|Q24564|MERH_DROME	Q24564	MERH_DROME	Mer	Moesin/ezrin/radixin homolog 2	512215	310551	525305	305730	627044	355099	556907	373261
sp|Q24574|UBPE_DROME	Q24574	UBPE_DROME	Ubp64E	Ubiquitin carboxyl-terminal hydrolase 64E	375192	462534	366887	406582	399808	494037	367985	510604
sp|Q24583|VATF1_DROME	Q24583	VATF1_DROME	Vha14-1	V-type proton ATPase subunit F 1	328000	382151	362331	552748	333692	502155	431579	457677
sp|Q24592|JAK_DROME	Q24592	JAK_DROME	hop	Tyrosine-protein kinase hopscotch	480021	336869	471837	381231	513002	369681	542297	387144
sp|Q26365|ADT_DROME	Q26365	ADT_DROME	sesB	ADP,ATP carrier protein	314403	434928	428837	458024	419905	447443	480130	417931
sp|Q26454|MCM4_DROME	Q26454	MCM4_DROME	dpa	DNA replication licensing factor MCM4	344428	467948	370170	385856	438905	538061	396309	493937
sp|Q27237|TID_DROME	Q27237	TID_DROME	l(2)tid	Protein tumorous imaginal discs, mitochondrial	558273	360200	485645	316982	555780	402154	490194	324380
sp|Q27268|DX39B_DROME	Q27268	DX39B_DROME	Hel25E	ATP-dependent RNA helicase WM6	431058	440411	392751	388659	430786	471808	402668	444574
sp|Q27272|TAF9_DROME	Q27272	TAF9_DROME	e(y)1	Transcription initiation factor TFIID subunit 9	443206	399952	476384	418376	461428	424906	369995	385005
sp|Q27294|CAZ_DROME	Q27294	CAZ_DROME	caz	RNA-binding protein cabeza	438543	423424	420523	413189	378737	406450	424378	458307
sp|Q27333|NT56_DROME	Q27333	NT56_DROME	l(2)not	Lethal(2)neighbour of tid protein	361735	421942	394995	391492	388223	477487	500977	514248
sp|Q27415|NLP_DROME	Q27415	NLP_DROME	Nlp	Nucleoplasmin-like protein	382924	501138	362778	432798	302795	430527	337950	534505
sp|Q27421|OSP_DROME	Q27421	OSP_DROME	osp	Protein outspread	656910	387417	406537	337833	375307	361630	488123	366052
sp|Q27580|SAHH_DROME	Q27580	SAHH_DROME	Ahcy13	Adenosylhomocysteinase	359428	527795	329860	422174	327623	466312	337166	533861
sp|Q27589|CP4D2_DROME	Q27589	CP4D2_DROME	Cyp4d2	Cytochrome P450 4d2	279603	577610	319180	579068	290722	467421	252934	389838
sp|Q27591|ITBN_DROME	Q27591	ITBN_DROME	Itgbetanu	Integrin beta-nu	252110	516077	319959	630749	375046	352831	453933	315065
sp|Q27593|CP6A8_DROME	Q27593	CP6A8_DROME	Cyp6a8	Cytochrome P450 6a8	191525	589691	270426	700187	192106	434622	220147	451450
sp|Q27594|CP6A9_DROME	Q27594	CP6A9_DROME	Cyp6a9	Cytochrome P450 6a9	177007	641291	211610	678845	194220	583016	204594	393887
sp|Q27601|PUR1_DROME	Q27601	PUR1_DROME	Prat	Amidophosphoribosyltransferase	397701	427397	414494	449748	428089	431572	387956	422166
sp|Q27606|CP4E2_DROME	Q27606	CP4E2_DROME	Cyp4e2	Cytochrome P450 4e2	348163	450762	391089	508030	390501	392009	403478	420375
sp|Q27607|DPOG1_DROME	Q27607	DPOG1_DROME	tam	DNA polymerase subunit gamma-1, mitochondrial	440039	354656	471188	355584	507096	445949	558559	393462
sp|Q27869|PIMT_DROME	Q27869	PIMT_DROME	Pcmt	Protein-L-isoaspartate(D-aspartate) O-methyltransferase	424584	418196	415201	383368	512201	416982	466035	407885
sp|Q2PE14|ZCHC8_DROME	Q2PE14	ZCHC8_DROME	CG4622	Zinc finger CCHC domain-containing protein 8 homolog	549597	354076	520466	339277	495940	334833	505918	348614
sp|Q32KD2|SETB1_DROME	Q32KD2	SETB1_DROME	egg	Histone-lysine N-methyltransferase eggless	418211	571929	401709	475239	314658	427397	312678	272329
sp|Q45VV3|YORKI_DROME	Q45VV3	YORKI_DROME	yki	Protein yorkie	514942	339899	513652	381757	539101	382778	483062	303615
sp|Q4V5I9|SDF2A_DROME	Q4V5I9	SDF2A_DROME	CG14757	Succinate dehydrogenase assembly factor 2-A, mitochondrial	649662	251028	698330	189527	783475	247151	627516	208658
sp|Q4V6M7|UFSP1_DROME	Q4V6M7	UFSP1_DROME	UFSP1	Probable Ufm1-specific protease 1	346199	364727	395574	384346	505433	413179	456787	628813
sp|Q4Z8K6|RBP9X_DROME	Q4Z8K6	RBP9X_DROME	RanBPM	Ran-binding proteins 9/10 homolog	451536	414760	445331	401585	439868	409099	432807	395686
sp|Q5EAK6|ATM_DROME	Q5EAK6	ATM_DROME	tefu	Serine/threonine-protein kinase ATM	231949	539209	241439	529869	243477	604204	241060	628362
sp|Q6AWN0|MTND_DROME	Q6AWN0	MTND_DROME	CG32068	1,2-dihydroxy-3-keto-5-methylthiopentene dioxygenase	368391	502610	391153	426619	400146	461367	340940	435997
sp|Q6NN40|NTM1_DROME	Q6NN40	NTM1_DROME	Ntmt	Alpha N-terminal protein methyltransferase 1	425682	411767	470758	358963	429307	397577	482029	458448
sp|Q6WV17|GALT5_DROME	Q6WV17	GALT5_DROME	pgant5	Polypeptide N-acetylgalactosaminyltransferase 5	405115	447136	459153	463033	365559	420284	344606	392501
sp|Q6WV19|GALT2_DROME	Q6WV19	GALT2_DROME	pgant2	Polypeptide N-acetylgalactosaminyltransferase 2	591668	458126	459585	394294	402046	301903	377013	283183
sp|Q70PP2|SMG1_DROME	Q70PP2	SMG1_DROME	nonC	Serine/threonine-protein kinase Smg1	436074	391470	432579	437481	438102	414933	431113	405240
sp|Q70PY2|PGSB1_DROME	Q70PY2	PGSB1_DROME	PGRP-SB1	Peptidoglycan-recognition protein SB1	139245	723291	175266	645322	138334	632959	134046	462084
sp|Q7JQW6|LIAS_DROME	Q7JQW6	LIAS_DROME	Las	Lipoyl synthase, mitochondrial	512828	310472	542928	320263	550689	331684	621757	354756
sp|Q7JUR6|GDAP2_DROME	Q7JUR6	GDAP2_DROME	CG18812	Protein GDAP2 homolog	441046	552213	443473	483977	381635	317792	364442	205739
sp|Q7JUX9|MRRP1_DROME	Q7JUX9	MRRP1_DROME	trmt10c	Mitochondrial ribonuclease P protein 1 homolog	525268	369583	508528	333159	467941	367924	501978	378359
sp|Q7JVI3|EIF3M_DROME	Q7JVI3	EIF3M_DROME	Tango7	Eukaryotic translation initiation factor 3 subunit M	458396	390266	467715	383718	462126	383782	484217	397088
sp|Q7JW12|TMX2_DROME	Q7JW12	TMX2_DROME	CG11007	Thioredoxin-related transmembrane protein 2 homolog	515509	448647	474296	359673	468073	331578	404830	350544
sp|Q7JW27|WASH1_DROME	Q7JW27	WASH1_DROME	wash	WAS protein family homolog 1	471997	411520	392885	418922	419211	456255	399440	408764
sp|Q7JWD3|ASNA_DROME	Q7JWD3	ASNA_DROME	CG1598	ATPase ASNA1 homolog	399973	428133	406812	401529	456851	403075	452920	461222
sp|Q7JWG9|RM52_DROME	Q7JWG9	RM52_DROME	mRpL52	39S ribosomal protein L52, mitochondrial	610887	357505	556105	296430	479178	269274	488564	366678
sp|Q7JWR9|ZC3HF_DROME	Q7JWR9	ZC3HF_DROME	CG8635	Zinc finger CCCH domain-containing protein 15 homolog	485879	368286	498349	362949	470864	357804	477510	414503
sp|Q7JYV7|KAD6_DROME	Q7JYV7	KAD6_DROME	Ak6	Adenylate kinase isoenzyme 6 homolog	327384	549807	298294	365564	288097	516917	303172	686686
sp|Q7JZM8|RM41_DROME	Q7JZM8	RM41_DROME	mRpL41	39S ribosomal protein L41, mitochondrial	524368	297277	546208	315759	542789	318113	608637	389373
sp|Q7K0E3|MOB4_DROME	Q7K0E3	MOB4_DROME	Mob4	MOB kinase activator-like 4	420983	417333	424831	418209	413146	439779	436275	421098
sp|Q7K0Y1|BOP1_DROME	Q7K0Y1	BOP1_DROME	CG5033	Ribosome biogenesis protein BOP1 homolog	337257	472185	329399	494866	292014	490797	314198	554858
sp|Q7K1Y4|CIAO1_DROME	Q7K1Y4	CIAO1_DROME	Ciao1	Probable cytosolic iron-sulfur protein assembly protein Ciao1	370562	430153	385875	411103	445087	482578	389412	500337
sp|Q7K1Z5|UFC1_DROME	Q7K1Z5	UFC1_DROME	CG8386	Ubiquitin-fold modifier-conjugating enzyme 1	408787	456346	394094	396201	421357	430731	411909	462544
sp|Q7K284|CLP1_DROME	Q7K284	CLP1_DROME	cbc	Protein CLP1 homolog	499990	374357	571113	286112	555113	444519	468858	319791
sp|Q7K2B0|RRP8_DROME	Q7K2B0	RRP8_DROME	CG7137	Ribosomal RNA-processing protein 8	224208	567174	236767	522032	213912	658786	210036	616646
sp|Q7K2D2|DCTN2_DROME	Q7K2D2	DCTN2_DROME	Dmn	Probable dynactin subunit 2	471148	381502	485558	373103	471113	364810	491727	394335
sp|Q7K2G1-2|ADRM1_DROME	Q7K2G1-2	ADRM1_DROME	Rpn13	Isoform 2 of Proteasomal ubiquitin receptor ADRM1 homolog	422191	421122	377138	470044	412613	435917	370212	428499
sp|Q7K486|ARMC6_DROME	Q7K486	ARMC6_DROME	CG5721	Armadillo repeat-containing protein 6 homolog	482312	444252	461429	403698	430962	387190	402791	330038
sp|Q7K4B3|ELP2_DROME	Q7K4B3	ELP2_DROME	Elp2	Probable elongator complex protein 2	405598	438204	411304	400819	452982	391661	420552	467429
sp|Q7K4V4|AKTP1_DROME	Q7K4V4	AKTP1_DROME	cbx	Protein crossbronx	377012	408217	400567	362252	479421	450260	507440	508263
sp|Q7K4W1|CDKAL_DROME	Q7K4W1	CDKAL_DROME	CG6550	Threonylcarbamoyladenosine tRNA methylthiotransferase	330518	485906	326604	468617	318411	490976	365629	533518
sp|Q7K550|EIF3J_DROME	Q7K550	EIF3J_DROME	Adam	Eukaryotic translation initiation factor 3 subunit J	367960	488207	399038	431338	380823	455671	342240	460043
sp|Q7K7A9|FEN1_DROME	Q7K7A9	FEN1_DROME	Fen1	Flap endonuclease 1	218505	569384	240463	536932	195018	567703	246055	643381
sp|Q7KKH3|SDA1_DROME	Q7KKH3	SDA1_DROME	Mys45A	Protein SDA1 homolog	264726	529293	248134	506133	230128	556613	285282	646444
sp|Q7KLV9|PSD11_DROME	Q7KLV9	PSD11_DROME	Rpn6	26S proteasome non-ATPase regulatory subunit 11	385594	442379	391429	433092	389102	438737	397027	483946
sp|Q7KML2|ACOX1_DROME	Q7KML2	ACOX1_DROME	CG5009	Probable peroxisomal acyl-coenzyme A oxidase 1	336686	469401	350883	511379	349893	429656	370831	469913
sp|Q7KN62|TERA_DROME	Q7KN62	TERA_DROME	TER94	Transitional endoplasmic reticulum ATPase TER94	411231	457394	403082	429483	399959	427746	398893	418514
sp|Q7KN79|LTV1_DROME	Q7KN79	LTV1_DROME	CG7686	Protein LTV1 homolog	340841	483758	334368	390765	301467	534576	334632	649238
sp|Q7KN90|SYCC_DROME	Q7KN90	SYCC_DROME	Aats-cys	Cysteine--tRNA ligase, cytoplasmic	463650	404817	446077	379496	460226	409223	459086	399160
sp|Q7KNA0|DYM_DROME	Q7KNA0	DYM_DROME	CG8230	Dymeclin	322804	377608	353790	412226	492710	550991	517708	507988
sp|Q7KNS3|LIS1_DROME	Q7KNS3	LIS1_DROME	Lis-1	Lissencephaly-1 homolog	479450	336329	547178	362597	549005	340871	565900	314313
sp|Q7KQM6|PERQ1_DROME	Q7KQM6	PERQ1_DROME	CG11148	PERQ amino acid-rich with GYF domain-containing protein CG11148	475308	382297	480552	344125	506751	368324	500571	407545
sp|Q7KQZ4|LOLA3_DROME	Q7KQZ4	LOLA3_DROME	lola	Longitudinals lacking protein, isoforms A/B/D/L	464873	407563	444330	375083	499463	396587	421697	409200
sp|Q7KR04|RS15B_DROME	Q7KR04	RS15B_DROME	RpS15Ab	40S ribosomal protein S15Ab	814722	121764	836816	112277	821867	94057.2	836557	113149
sp|Q7KRR5|NGLY1_DROME	Q7KRR5	NGLY1_DROME	Pngl	Peptide-N(4)-(N-acetyl-beta-glucosaminyl)asparagine amidase	350895	495985	311219	484878	314879	498076	332040	501892
sp|Q7KRW8|PRP39_DROME	Q7KRW8	PRP39_DROME	CG1646	Pre-mRNA-processing factor 39	473957	395650	454157	349191	491083	411222	488755	398139
sp|Q7KRW8-6|PRP39_DROME	Q7KRW8-6	PRP39_DROME	CG1646	Isoform H of Pre-mRNA-processing factor 39	445230	399582	550213	404100	410168	443742	462799	284163
sp|Q7KT91|C3390_DROME	Q7KT91	C3390_DROME	CG33090	Non-lysosomal glucosylceramidase	322541	449747	345974	503418	356107	510505	393217	461889
sp|Q7KUT2|LONM_DROME	Q7KUT2	LONM_DROME	Lon	Lon protease homolog, mitochondrial	397188	414649	401146	418021	388026	442498	458335	483364
sp|Q7KVA1|XYLT_DROME	Q7KVA1	XYLT_DROME	oxt	Xylosyltransferase oxt	438032	412851	400171	421940	424046	423623	441092	427413
sp|Q7KVQ0|GAR1_DROME	Q7KVQ0	GAR1_DROME	CG4038	Probable H/ACA ribonucleoprotein complex subunit 1	370825	515922	353886	493315	320683	405188	285369	476163
sp|Q7KW39|MMSA_DROME	Q7KW39	MMSA_DROME	CG17896	Probable methylmalonate-semialdehyde dehydrogenase [acylating], mitochondrial	215735	492820	273522	705228	266815	500141	290189	415339
sp|Q7PLI7|DCLK_DROME	Q7PLI7	DCLK_DROME	CG17528	Serine/threonine-protein kinase CG17528	482373	379821	482523	390850	469809	340734	485697	378116
sp|Q7PLS8|INT3_DROME	Q7PLS8	INT3_DROME	IntS3	Integrator complex subunit 3 homolog	386635	466778	376982	440499	375073	473634	355409	461823
sp|Q7YU24|MARF_DROME	Q7YU24	MARF_DROME	Marf	Transmembrane GTPase Marf	515774	404772	428756	347944	433306	393289	487926	414600
sp|Q7YZA2|Y7065_DROME	Q7YZA2	Y7065_DROME	CG7065	Uncharacterized protein CG7065	388457	475150	337618	428945	367318	515560	356204	484736
sp|Q867Z4-2|LOLA4_DROME	Q867Z4-2	LOLA4_DROME	lola	Isoform F of Longitudinals lacking protein, isoforms F/I/K/T	557816	310612	538383	294122	615724	380305	508273	344028
sp|Q868Z9|PPN_DROME	Q868Z9	PPN_DROME	Ppn	Papilin	387281	448175	457318	459672	377639	483388	354573	361718
sp|Q86B47|Y8611_DROME	Q86B47	Y8611_DROME	CG8611	Probable ATP-dependent RNA helicase CG8611	234893	538568	289707	498583	284245	592891	300211	561835
sp|Q86B61|TBH1_DROME	Q86B61	TBH1_DROME	Tbh	Tyramine beta-hydroxylase	275347	431751	292714	681872	289833	478291	333326	423106
sp|Q86B79|UNK_DROME	Q86B79	UNK_DROME	unk	RING finger protein unkempt	441372	376620	430487	385386	492514	435144	486168	420171
sp|Q86B87-13|MMD4_DROME	Q86B87-13	MMD4_DROME	mod(mdg4)	Isoform 55.6 of Modifier of mdg4	367210	465320	357143	478509	353272	512255	289155	482420
sp|Q86B87-4|MMD4_DROME	Q86B87-4	MMD4_DROME	mod(mdg4)	Isoform 62.3 of Modifier of mdg4	440817	391813	403280	424475	518925	376272	413699	433727
sp|Q86B87-9|MMD4_DROME	Q86B87-9	MMD4_DROME	mod(mdg4)	Isoform C of Modifier of mdg4	413938	430199	382192	423296	422381	385796	386708	513864
sp|Q86BA1|MICAL_DROME	Q86BA1	MICAL_DROME	Mical	Protein-methionine sulfoxide oxidase Mical	560897	279258	589282	312036	591331	330230	531286	340496
sp|Q86BL4|GATC_DROME	Q86BL4	GATC_DROME	CG33649	Glutamyl-tRNA(Gln) amidotransferase subunit C, mitochondrial	492925	342490	502384	356550	457515	388934	538711	398210
sp|Q86BN8|PTPM1_DROME	Q86BN8	PTPM1_DROME	Plip	Phosphatidylglycerophosphatase and protein-tyrosine phosphatase 1	522119	329636	498036	326766	571855	332768	590159	356843
sp|Q86BS6-3|METL_DROME	Q86BS6-3	METL_DROME	metl	Isoform 3 of Methyltransferase-like protein	403586	426203	353906	412192	385005	494433	438672	498282
sp|Q86BY9|RIG_DROME	Q86BY9	RIG_DROME	rig	Protein rigor mortis	411823	430414	380300	426061	405686	423328	394807	493854
sp|Q86NP2|NELFA_DROME	Q86NP2	NELFA_DROME	Nelf-A	Negative elongation factor A	438922	392794	456586	414356	481529	400808	452070	375590
sp|Q86P48|ATBP_DROME	Q86P48	ATBP_DROME	ATbp	AT-rich binding protein	400999	430052	447675	431606	396023	415612	355734	464215
sp|Q8I0G5|COPG_DROME	Q8I0G5	COPG_DROME	gammaCop	Coatomer subunit gamma	417233	420217	447374	442526	393153	370112	428748	423871
sp|Q8I8V0|TAD2B_DROME	Q8I8V0	TAD2B_DROME	Ada2b	Transcriptional adapter 2B	473059	377616	428089	387981	445589	471812	364174	469631
sp|Q8IGJ0|EFR3_DROME	Q8IGJ0	EFR3_DROME	stmA	Protein EFR3 homolog cmp44E	391058	409889	431633	425688	422835	437521	465592	425596
sp|Q8IH00|NOL6_DROME	Q8IH00	NOL6_DROME	Mat89Ba	Nucleolar protein 6	225350	575563	237079	534360	213743	561220	218541	642972
sp|Q8IH24|MED31_DROME	Q8IH24	MED31_DROME	MED31	Mediator of RNA polymerase II transcription subunit 31	426212	431805	434164	381847	426643	400386	369910	506043
sp|Q8IMP6|SPT2_DROME	Q8IMP6	SPT2_DROME	CG5815	Protein SPT2 homolog	393856	508886	367552	404834	312364	535013	268814	518133
sp|Q8IMX7|MIRO_DROME	Q8IMX7	MIRO_DROME	Miro	Mitochondrial Rho GTPase	486957	322774	514347	341623	513184	378064	570692	394460
sp|Q8IN43|TOTC_DROME	Q8IN43	TOTC_DROME	TotC	Protein Turandot C	16068.4	1.13814e+06	36490.3	642692	23149.2	604753	24435.1	291794
sp|Q8IN44|TOTA_DROME	Q8IN44	TOTA_DROME	TotA	Protein Turandot A	68746	758834	93432.8	833086	60367.4	499362	61132.2	471659
sp|Q8IN78|TIM22_DROME	Q8IN78	TIM22_DROME	Tim22	Mitochondrial import inner membrane translocase subunit Tim22	476296	369562	483675	350850	474842	379681	531098	405707
sp|Q8INB9|AKT1_DROME	Q8INB9	AKT1_DROME	Akt1	RAC serine/threonine-protein kinase	483615	487868	418939	357870	400007	380565	374651	428893
sp|Q8INK9|MSRB_DROME	Q8INK9	MSRB_DROME	SelR	Methionine-R-sulfoxide reductase B1	359272	496287	460779	421335	452198	425630	370273	356631
sp|Q8INM3|SLE_DROME	Q8INM3	SLE_DROME	sle	Protein slender lobes	377194	488136	346790	467126	314526	450269	292886	532104
sp|Q8INR6|DOT1L_DROME	Q8INR6	DOT1L_DROME	gpp	Histone-lysine N-methyltransferase, H3 lysine-79 specific	526465	317268	458025	394247	486661	478056	402580	393283
sp|Q8IPK4|GLT25_DROME	Q8IPK4	GLT25_DROME	CG31915	Glycosyltransferase 25 family member	374578	468224	354462	514464	359697	470365	347987	394335
sp|Q8IQ56|TMM11_DROME	Q8IQ56	TMM11_DROME	Pmi	Transmembrane protein 11 homolog, mitochondrial	458246	325059	487759	359472	528727	398140	597023	383573
sp|Q8IQF1|MOCS1_DROME	Q8IQF1	MOCS1_DROME	Mocs1	Molybdenum cofactor biosynthesis protein 1	323576	488821	341485	533897	324952	460415	373615	422757
sp|Q8IRE4|TRM5_DROME	Q8IRE4	TRM5_DROME	CG32281	tRNA (guanine(37)-N1)-methyltransferase	587783	327055	522325	290788	560566	323950	514337	377281
sp|Q8IRG6|SPT16_DROME	Q8IRG6	SPT16_DROME	dre4	FACT complex subunit spt16	301970	569772	289340	498401	264367	502741	255353	534712
sp|Q8IRJ8|THOC7_DROME	Q8IRJ8	THOC7_DROME	thoc7	THO complex protein 7	378969	406347	409009	397019	487505	458073	423179	488696
sp|Q8IRR5|SIR4_DROME	Q8IRR5	SIR4_DROME	Sirt4	NAD-dependent protein deacetylase Sirt4	477175	316423	504867	347905	570763	362769	640080	337820
sp|Q8IRW8-2|TRR_DROME	Q8IRW8-2	TRR_DROME	trr	Isoform 2 of Histone-lysine N-methyltransferase trr	465667	406595	452865	370796	477486	444626	422243	389401
sp|Q8IRY7|CASP8_DROME	Q8IRY7	CASP8_DROME	Dredd	Caspase-8	474977	403033	459973	362552	422878	376075	505237	418310
sp|Q8MKL1|U598_DROME	Q8MKL1	U598_DROME	CG30010	UPF0598 protein CG30010	419747	399688	439771	378541	470688	430000	515464	411032
sp|Q8MKN0|COQ9_DROME	Q8MKN0	COQ9_DROME	Coq9	Ubiquinone biosynthesis protein COQ9, mitochondrial	471374	316514	481752	306635	596279	404380	667639	373261
sp|Q8MKW7|RNZ_DROME	Q8MKW7	RNZ_DROME	JhI-1	Ribonuclease Z, mitochondrial	362128	444785	379348	417974	407026	483669	438256	475903
sp|Q8MLL3|COQ10_DROME	Q8MLL3	COQ10_DROME	Coq10	Coenzyme Q-binding protein COQ10, mitochondrial	463238	344280	488470	321992	618209	369326	667179	314913
sp|Q8MLV1|LBR_DROME	Q8MLV1	LBR_DROME	LBR	Lamin-B receptor	598084	312414	588266	318719	533201	292328	499527	319861
sp|Q8MLY8|RS8_DROME	Q8MLY8	RS8_DROME	RpS8	40S ribosomal protein S8	558573	318939	572328	326549	547267	299635	552974	312122
sp|Q8MLZ7|IDGF3_DROME	Q8MLZ7	IDGF3_DROME	Idgf3	Chitinase-like protein Idgf3	306192	489730	348701	548087	369096	488939	334540	387457
sp|Q8MM24|IDGF1_DROME	Q8MM24	IDGF1_DROME	Idgf1	Chitinase-like protein Idgf1	146141	629838	263225	576859	226966	734440	291359	376077
sp|Q8MMC4|CDV3_DROME	Q8MMC4	CDV3_DROME	CG3760	Protein CDV3 homolog	460582	392786	462134	311002	490756	392846	503377	478097
sp|Q8MMC4-2|CDV3_DROME	Q8MMC4-2	CDV3_DROME	CG3760	Isoform B of Protein CDV3 homolog	447611	402975	435262	337996	466905	412186	531623	446784
sp|Q8MR45|ASPG1_DROME	Q8MR45	ASPG1_DROME	CG1827	Putative N(4)-(beta-N-acetylglucosaminyl)-L-asparaginase CG1827	321420	448664	350970	551336	407285	414370	373435	423167
sp|Q8MRC9|GALT9_DROME	Q8MRC9	GALT9_DROME	pgant9	Putative polypeptide N-acetylgalactosaminyltransferase 9	353845	508246	463851	520414	285643	402794	295676	362929
sp|Q8MRQ4|LMBD2_DROME	Q8MRQ4	LMBD2_DROME	CG8135	LMBR1 domain-containing protein 2 homolog	391422	405463	451054	464713	400518	418522	439697	392712
sp|Q8MS27|RM35_DROME	Q8MS27	RM35_DROME	mRpL35	39S ribosomal protein L35, mitochondrial	474414	374525	511625	339882	484266	348874	600084	354106
sp|Q8MSG8|APTX_DROME	Q8MSG8	APTX_DROME	CG5316	Aprataxin-like protein	348477	523426	296447	439815	315943	454885	360922	562120
sp|Q8MSS1|LVA_DROME	Q8MSS1	LVA_DROME	lva	Protein lava lamp	375199	425522	406798	458388	393664	473940	422446	419278
sp|Q8MSU3|FRRS1_DROME	Q8MSU3	FRRS1_DROME	CG8399	Putative ferric-chelate reductase 1 homolog	508664	404760	467152	442681	402898	399095	423179	285413
sp|Q8MSU4|SYMPK_DROME	Q8MSU4	SYMPK_DROME	Sym	Symplekin	354460	447608	358450	446636	369812	510169	356215	521973
sp|Q8MSV2|SHEP_DROME	Q8MSV2	SHEP_DROME	shep	Protein alan shepard	532811	346477	512869	307151	542537	354628	515219	390839
sp|Q8MSY4|VPS51_DROME	Q8MSY4	VPS51_DROME	CG15087	Vacuolar protein sorting-associated protein 51 homolog	411413	387109	392597	415572	467881	469201	441288	458532
sp|Q8MT06|GNL3_DROME	Q8MT06	GNL3_DROME	Ns1	Guanine nucleotide-binding protein-like 3 homolog	446943	421047	410308	406561	378656	430540	377896	489487
sp|Q8MV48|GALT7_DROME	Q8MV48	GALT7_DROME	GalNAc-T2	N-acetylgalactosaminyltransferase 7	382939	458948	422816	471339	368370	425417	371892	403651
sp|Q8MVS5|GLT35_DROME	Q8MVS5	GLT35_DROME	Pgant35A	Polypeptide N-acetylgalactosaminyltransferase 35A	416371	429620	462093	459963	361342	353735	406548	414229
sp|Q8MZC4|CRLS1_DROME	Q8MZC4	CRLS1_DROME	CLS	Probable cardiolipin synthase	358102	374153	403706	476607	418595	453322	451404	472809
sp|Q8ST83|PHO_DROME	Q8ST83	PHO_DROME	pho	Polycomb protein PHO	574223	328998	569013	324871	518251	306280	501229	334777
sp|Q8SWR8|ATX2_DROME	Q8SWR8	ATX2_DROME	Atx2	Ataxin-2 homolog	471370	378746	463448	372907	463998	374553	482973	427719
sp|Q8SX68|Y0915_DROME	Q8SX68	Y0915_DROME	CG10915	Uncharacterized protein CG10915	477579	349173	464669	360610	548205	402834	491852	399822
sp|Q8SX86|NUTC_DROME	Q8SX86	NUTC_DROME	ntc	Protein nutcracker	516732	324508	505761	321048	593477	378801	531295	366504
sp|Q8SXY6|TMEDA_DROME	Q8SXY6	TMEDA_DROME	bai	Transmembrane emp24 domain-containing protein bai	458335	412200	444498	466959	394060	389922	393871	355879
sp|Q8SY33|GAWKY_DROME	Q8SY33	GAWKY_DROME	gw	Protein Gawky	458636	371181	469441	352784	484550	413834	515993	418067
sp|Q8SY61|OB56D_DROME	Q8SY61	OB56D_DROME	Obp56d	General odorant-binding protein 56d	366544	628823	386909	578778	272965	303280	178500	300663
sp|Q8SY96|NFU1_DROME	Q8SY96	NFU1_DROME	CG32500	NFU1 iron-sulfur cluster scaffold homolog, mitochondrial	484309	321369	516421	340959	534824	364383	617287	360301
sp|Q8SYD0|TTC19_DROME	Q8SYD0	TTC19_DROME	Ttc19	Tetratricopeptide repeat protein 19 homolog, mitochondrial	489999	319163	483336	325085	591183	365460	644648	359233
sp|Q8SYG2|CSN3_DROME	Q8SYG2	CSN3_DROME	CSN3	COP9 signalosome complex subunit 3	439065	432698	433842	372037	460081	400693	440872	430905
sp|Q8SYS7|NARF_DROME	Q8SYS7	NARF_DROME	CG17683	Probable cytosolic Fe-S cluster assembly factor CG17683	541489	345225	542110	328697	527096	309645	506421	361857
sp|Q8SZ63|GOGA5_DROME	Q8SZ63	GOGA5_DROME	Golgin84	Golgin-84	458650	416950	436154	404489	442194	409003	423790	392983
sp|Q8T045|RUMI_DROME	Q8T045	RUMI_DROME	rumi	O-glucosyltransferase rumi	406426	442298	395783	444845	365489	416665	396508	465504
sp|Q8T079|GLYR1_DROME	Q8T079	GLYR1_DROME	CG4747	Putative oxidoreductase GLYR1 homolog	515876	387467	487229	350655	465064	433402	413433	374209
sp|Q8T088|WDR55_DROME	Q8T088	WDR55_DROME	CG14722	WD repeat-containing protein 55 homolog	448736	415404	428717	331466	436174	433526	436673	517259
sp|Q8T0B1|NEPR1_DROME	Q8T0B1	NEPR1_DROME	CG8009	Nuclear envelope phosphatase-regulatory subunit 1 homolog	416517	460134	358878	424281	405116	472612	379930	443156
sp|Q8T0R7|IDGF5_DROME	Q8T0R7	IDGF5_DROME	Idgf5	Chitinase-like protein Idgf5	325759	447856	349435	516873	409019	428791	431655	426383
sp|Q8T0S6|HIPPO_DROME	Q8T0S6	HIPPO_DROME	hpo	Serine/threonine-protein kinase hippo	463987	410178	420301	376333	446511	398490	451653	446534
sp|Q8T3L6|FABD_DROME	Q8T3L6	FABD_DROME	beg	Probable malonyl-CoA-acyl carrier protein transacylase, mitochondrial	362143	440889	372150	455415	382227	496681	380648	476345
sp|Q8T3U2|RS23_DROME	Q8T3U2	RS23_DROME	RpS23	40S ribosomal protein S23	534188	312523	541187	330510	539654	303744	551973	384962
sp|Q8T4E1|GPI8_DROME	Q8T4E1	GPI8_DROME	CG4406	Putative GPI-anchor transamidase	436221	468635	445041	432764	370040	409748	339644	391932
sp|Q8T4F7|ENA_DROME	Q8T4F7	ENA_DROME	ena	Protein enabled	384068	415344	403678	460922	351961	445966	403883	486004
sp|Q8T626|DLT_DROME	Q8T626	DLT_DROME	dlt	Protein disks lost	321848	474485	295015	482462	343575	522921	368588	532209
sp|Q8T6B9|PUF68_DROME	Q8T6B9	PUF68_DROME	pUf68	Poly(U)-binding-splicing factor half pint	474893	396186	453815	397107	442018	369252	454795	404464
sp|Q8T8R1|Y3800_DROME	Q8T8R1	Y3800_DROME	CG3800	CCHC-type zinc finger protein CG3800	531747	468429	484775	472500	280777	240156	326282	350723
sp|Q8T9B6|MESD_DROME	Q8T9B6	MESD_DROME	boca	LDLR chaperone boca	499236	350001	470251	369053	528539	378095	531018	354309
sp|Q8WSF3|FDL_DROME	Q8WSF3	FDL_DROME	fdl	Probable beta-hexosaminidase fdl	398421	457125	367545	473066	390381	415139	395832	419451
sp|Q8WTC1|RT15_DROME	Q8WTC1	RT15_DROME	bonsai	28S ribosomal protein S15, mitochondrial	444626	351888	442490	362281	469916	414630	558199	461451
sp|Q94514|COX5A_DROME	Q94514	COX5A_DROME	CoVa	Cytochrome c oxidase subunit 5A, mitochondrial	470399	367662	505443	340659	549058	349150	563575	354458
sp|Q94516|AT5F1_DROME	Q94516	AT5F1_DROME	ATPsyn-b	ATP synthase subunit b, mitochondrial	483528	395825	537547	388053	476288	323030	461461	319382
sp|Q94517|HDAC1_DROME	Q94517	HDAC1_DROME	Rpd3	Histone deacetylase Rpd3	409872	450680	411976	373658	402383	454075	396369	496557
sp|Q94518|NACA_DROME	Q94518	NACA_DROME	Nacalpha	Nascent polypeptide-associated complex subunit alpha	570192	372195	549207	305210	511358	299387	511246	328286
sp|Q94521|DNAT_DROME	Q94521	DNAT_DROME	Dat	Dopamine N-acetyltransferase	316038	479401	435190	668045	271555	354579	252306	315994
sp|Q94523|SDHA_DROME	Q94523	SDHA_DROME	SdhA	Succinate dehydrogenase [ubiquinone] flavoprotein subunit, mitochondrial	508950	345660	553832	370025	496224	346839	557440	281313
sp|Q94524|DYLT_DROME	Q94524	DYLT_DROME	Dlc90F	Dynein light chain Tctex-type	434652	418321	424191	409567	420929	413490	430574	433858
sp|Q94527|NFKB1_DROME	Q94527	NFKB1_DROME	Rel	Nuclear factor NF-kappa-B p110 subunit	268946	637744	275976	481651	258890	521450	222993	524497
sp|Q94529|GS1_DROME	Q94529	GS1_DROME	Gs1l	Probable pseudouridine-5'-monophosphatase	382113	475685	380811	421123	403223	441252	395069	456204
sp|Q94546|ATU_DROME	Q94546	ATU_DROME	Atu	Another transcription unit protein	356635	460339	401081	441141	388126	496714	309120	489914
sp|Q94547|RGA_DROME	Q94547	RGA_DROME	Rga	Regulator of gene activity	512893	328094	485084	362367	549618	328819	564743	362339
sp|Q94901|LARK_DROME	Q94901	LARK_DROME	lark	RNA-binding protein lark	452438	404402	463484	393733	437967	412381	420107	412223
sp|Q94913|REG5_DROME	Q94913	REG5_DROME	Reg-5	Rhythmically expressed gene 5 protein	494563	468873	352418	525829	206746	396786	329353	396666
sp|Q94915|REG2_DROME	Q94915	REG2_DROME	Reg-2	Rhythmically expressed gene 2 protein	188243	560741	227000	728578	161913	479495	169440	528472
sp|Q95029|CATL_DROME	Q95029	CATL_DROME	Cp1	Cathepsin L	284499	538188	290829	601675	240498	437265	280673	478149
sp|Q95083|PSA5_DROME	Q95083	PSA5_DROME	Prosalpha5	Proteasome subunit alpha type-5	482535	479545	466250	340484	503486	385900	329103	373999
sp|Q95R48|OCTL_DROME	Q95R48	OCTL_DROME	Orct2	Organic cation transporter-like protein	298801	541609	307184	573605	232618	508954	283580	436842
sp|Q95RA8|MOB1_DROME	Q95RA8	MOB1_DROME	mats	MOB kinase activator-like 1	451845	417283	439457	448390	394595	386802	413085	381178
sp|Q95RJ9|EBI_DROME	Q95RJ9	EBI_DROME	ebi	F-box-like/WD repeat-containing protein ebi	436414	432846	387252	387686	459151	433732	397191	467515
sp|Q95RN0|U528_DROME	Q95RN0	U528_DROME	CG10038	UPF0528 protein CG10038	487644	378818	428225	351863	538559	407984	524451	374806
sp|Q95RU0|CUE_DROME	Q95RU0	CUE_DROME	cue	Protein cueball	455317	296336	543610	363198	518930	364476	607087	388967
sp|Q95SK3|CK5P3_DROME	Q95SK3	CK5P3_DROME	CG30291	CDK5RAP3-like protein	412729	445541	395326	427930	400499	437479	406071	434603
sp|Q95SP2|HRD1_DROME	Q95SP2	HRD1_DROME	sip3	E3 ubiquitin-protein ligase HRD1	468752	364326	457939	437540	339244	384567	415489	482030
sp|Q95SS8|TMM70_DROME	Q95SS8	TMM70_DROME	CG7506	Transmembrane protein 70 homolog, mitochondrial	648757	289034	625994	290608	535118	256894	597798	252214
sp|Q95T12|FLOWR_DROME	Q95T12	FLOWR_DROME	fwe	Calcium channel flower	344911	390803	397524	396232	441616	554660	468545	505460
sp|Q95T64-2|PGPLA_DROME	Q95T64-2	PGPLA_DROME	PGRP-LA	Isoform 2 of Peptidoglycan-recognition protein LA	521223	363642	486444	367191	399109	362257	491879	421079
sp|Q95TN1|TPC13_DROME	Q95TN1	TPC13_DROME	CG4953	Probable trafficking protein particle complex subunit 13 homolog	427474	339436	509278	445639	411168	447033	449074	385780
sp|Q95TN4|COG4_DROME	Q95TN4	COG4_DROME	CG7456	Conserved oligomeric Golgi complex subunit 4	417007	424960	432294	400291	424225	427616	476583	408098
sp|Q960E8|TF2H1_DROME	Q960E8	TF2H1_DROME	Tfb1	General transcription factor IIH subunit 1	445442	425518	408112	390702	444386	441861	403679	439944
sp|Q960T2-5|SAP47_DROME	Q960T2-5	SAP47_DROME	Sap47	Isoform G of Synapse-associated protein of 47 kDa	291146	402508	275426	775764	270289	428883	258752	411999
sp|Q960W6|FACR3_DROME	Q960W6	FACR3_DROME	CG8306	Putative fatty acyl-CoA reductase CG8306	438566	435936	448437	414961	367345	393482	434415	414574
sp|Q960X8|HRS_DROME	Q960X8	HRS_DROME	Hrs	Hepatocyte growth factor-regulated tyrosine kinase substrate	408711	493944	394861	470308	363514	425738	333321	377167
sp|Q961D9|BCL9_DROME	Q961D9	BCL9_DROME	lgs	Protein BCL9 homolog	487599	365643	492330	317229	604149	407807	562994	309095
sp|Q961G1|COG3_DROME	Q961G1	COG3_DROME	Cog3	Conserved oligomeric Golgi complex subunit 3	423858	416464	420175	414781	432961	432057	442598	416376
sp|Q9GPJ1|SKEL2_DROME	Q9GPJ1	SKEL2_DROME	Skeletor	Protein Skeletor, isoforms D/E	493735	383061	415127	559052	389183	302336	336459	339827
sp|Q9GQN5|ATRX_DROME	Q9GQN5	ATRX_DROME	XNP	Transcriptional regulator ATRX homolog	439770	369727	392727	433700	430002	424426	471351	456911
sp|Q9GQQ0-2|SPIN_DROME	Q9GQQ0-2	SPIN_DROME	spin	Isoform B of Protein spinster	438251	352339	435490	386902	487096	410580	558433	425621
sp|Q9GU68|IF5A_DROME	Q9GU68	IF5A_DROME	eIF-5A	Eukaryotic translation initiation factor 5A	398036	421747	393228	364201	469466	441394	522848	466893
sp|Q9GYU8|NUP88_DROME	Q9GYU8	NUP88_DROME	mbo	Nuclear pore complex protein Nup88	359347	481806	373548	466409	338856	464930	340291	475908
sp|Q9GYV5|NEMO_DROME	Q9GYV5	NEMO_DROME	key	NF-kappa-B essential modulator	324279	472490	352933	430879	363734	526644	405046	512154
sp|Q9I7D3|CAPR1_DROME	Q9I7D3	CAPR1_DROME	Capr	Caprin homolog	480751	381251	473503	378072	449939	346396	487576	418401
sp|Q9I7F7|PR2_DROME	Q9I7F7	PR2_DROME	PR2	Tyrosine-protein kinase PR2	398264	498745	339595	490959	297066	461207	324434	438757
sp|Q9I7I7|SIRT2_DROME	Q9I7I7	SIRT2_DROME	Sirt2	NAD-dependent protein deacetylase Sirt2	423400	407465	434761	388063	474888	419710	422601	452512
sp|Q9I7K0|JUPIT_DROME	Q9I7K0	JUPIT_DROME	Jupiter	Microtubule-associated protein Jupiter	525502	445534	479448	350871	357594	338840	432920	406709
sp|Q9I7K6|NASP_DROME	Q9I7K6	NASP_DROME	CG8223	Protein NASP homolog	537068	464724	377018	380305	402560	369340	354711	425886
sp|Q9I7M2|GTPBA_DROME	Q9I7M2	GTPBA_DROME	CG10628	GTP-binding protein 10 homolog	338199	432796	349432	488403	337260	497886	377270	523892
sp|Q9I7T7|Y1505_DROME	Q9I7T7	Y1505_DROME	CG11505	La-related protein CG11505	511404	345227	513791	351974	487123	332873	522992	393873
sp|Q9I7W5|SAS10_DROME	Q9I7W5	SAS10_DROME	Sas10	Something about silencing protein 10	212357	548893	215865	542689	209517	642819	229937	650120
sp|Q9N2M8|HDC_DROME	Q9N2M8	HDC_DROME	hdc	Headcase protein	513059	434587	387065	386889	401582	400979	384009	441160
sp|Q9NBD7|CLASP_DROME	Q9NBD7	CLASP_DROME	chb	CLIP-associating protein	493971	393111	464511	383513	427737	362770	479801	393152
sp|Q9NFU0|FMR1_DROME	Q9NFU0	FMR1_DROME	Fmr1	Fragile X mental retardation syndrome-related protein 1	449467	437203	430629	371122	442847	426947	425120	420476
sp|Q9NG98|TOP3A_DROME	Q9NG98	TOP3A_DROME	Top3alpha	DNA topoisomerase 3-alpha	200561	599177	214698	550588	199637	636698	218661	591864
sp|Q9NGC3|CEG1A_DROME	Q9NGC3	CEG1A_DROME	CenG1A	Centaurin-gamma-1A	418954	370661	476749	394833	487035	427174	458985	420105
sp|Q9NHA8|BGBP3_DROME	Q9NHA8	BGBP3_DROME	GNBP3	Gram-negative bacteria-binding protein 3	312944	548726	370950	518335	484831	329625	245405	399486
sp|Q9NHD5|SAN_DROME	Q9NHD5	SAN_DROME	san	Probable N-acetyltransferase san	421424	392534	430111	361455	455261	425864	494256	488589
sp|Q9NHE5|CAPS_DROME	Q9NHE5	CAPS_DROME	Caps	Calcium-dependent secretion activator	344193	350381	312600	625352	445560	442346	415584	393267
sp|Q9NI63|PMYT1_DROME	Q9NI63	PMYT1_DROME	Myt1	Membrane-associated tyrosine- and threonine-specific cdc2-inhibitory kinase	373189	431806	297202	455435	444714	466406	382597	534314
sp|Q9NIV1|E2AK3_DROME	Q9NIV1	E2AK3_DROME	PEK	Eukaryotic translation initiation factor 2-alpha kinase	353487	445459	343692	465476	376338	499218	397362	485533
sp|Q9NJH0|EF1G_DROME	Q9NJH0	EF1G_DROME	Ef1gamma	Elongation factor 1-gamma	379993	450683	399109	424249	356022	455722	395619	497152
sp|Q9NK57|GTPC1_DROME	Q9NK57	GTPC1_DROME	anon-35F/36A	Putative GTP cyclohydrolase 1 type 2	445734	462634	399800	380738	429751	397065	424933	432849
sp|Q9TVM2|XPO1_DROME	Q9TVM2	XPO1_DROME	emb	Exportin-1	335366	513137	334434	442159	357208	466605	331977	531871
sp|Q9TVP3-2|JDP_DROME	Q9TVP3-2	JDP_DROME	jdp	Isoform A of J domain-containing protein	359204	406749	356615	766022	206068	334457	255831	358362
sp|Q9TVQ5|SPT4H_DROME	Q9TVQ5	SPT4H_DROME	spt4	Transcription elongation factor SPT4	485997	502138	338445	434030	358995	401078	374456	379491
sp|Q9U1H9|NXF1_DROME	Q9U1H9	NXF1_DROME	sbr	Nuclear RNA export factor 1	300103	483153	322031	479251	304000	524722	330285	575872
sp|Q9U3V9|XMAS2_DROME	Q9U3V9	XMAS2_DROME	xmas-2	Protein xmas-2	428171	423505	422004	428425	408889	441887	404501	411727
sp|Q9U3W6|MAB21_DROME	Q9U3W6	MAB21_DROME	mab-21	Protein mab-21	495361	376055	505093	317374	443832	417641	435039	466276
sp|Q9U405|GRAU_DROME	Q9U405	GRAU_DROME	grau	Transcription factor grauzone	389264	475217	378497	428677	362380	480957	344777	474531
sp|Q9U4F3|SURF1_DROME	Q9U4F3	SURF1_DROME	Surf1	SURF1-like protein	504313	295092	540299	298733	656672	370226	668061	293732
sp|Q9U5L1|SRPR_DROME	Q9U5L1	SRPR_DROME	Gtp-bp	Signal recognition particle receptor subunit alpha homolog	433513	419220	430773	435116	401316	396185	433012	408232
sp|Q9U6M0|ECSIT_DROME	Q9U6M0	ECSIT_DROME	ECSIT	Evolutionarily conserved signaling intermediate in Toll pathway, mitochondrial	426296	366537	440458	388768	481419	420306	525097	430207
sp|Q9U6Y9-2|ANM5_DROME	Q9U6Y9-2	ANM5_DROME	csul	Isoform 2 of Protein arginine N-methyltransferase 5	259227	573591	247992	475108	290729	528251	272137	619915
sp|Q9U915|KAD2_DROME	Q9U915	KAD2_DROME	Adk2	Adenylate kinase	459227	330207	521352	340140	550309	411824	578488	357170
sp|Q9U9P7|PITC1_DROME	Q9U9P7	PITC1_DROME	rdgBbeta	Cytoplasmic phosphatidylinositol transfer protein 1	512385	356906	492479	319733	553294	323361	556415	387096
sp|Q9U9Q4|EIF3H_DROME	Q9U9Q4	EIF3H_DROME	eIF-3p40	Eukaryotic translation initiation factor 3 subunit H	442987	365631	491844	357537	495494	383915	500653	438105
sp|Q9V359|VPS28_DROME	Q9V359	VPS28_DROME	Vps28	Vacuolar protein sorting-associated protein 28 homolog	424729	423953	457665	392830	416740	416541	431392	428971
sp|Q9V3A6|ERO1L_DROME	Q9V3A6	ERO1L_DROME	Ero1L	Ero1-like protein	408327	435591	431677	431887	400486	433167	446470	384149
sp|Q9V3B6|CWC15_DROME	Q9V3B6	CWC15_DROME	c12.1	Protein CWC15 homolog	513023	384123	433904	371894	491485	348901	482461	398272
sp|Q9V3C0|DDX41_DROME	Q9V3C0	DDX41_DROME	abs	ATP-dependent RNA helicase abstrakt	421439	424987	424026	428614	421029	412391	398362	431604
sp|Q9V3C5|RIC1_DROME	Q9V3C5	RIC1_DROME	Rich	Protein RIC1 homolog	511159	364679	456066	380042	516177	316954	507306	380828
sp|Q9V3D2|HEM6_DROME	Q9V3D2	HEM6_DROME	Coprox	Coproporphyrinogen-III oxidase	340319	466103	347058	485190	319174	467689	392217	499361
sp|Q9V3D4|IDGF2_DROME	Q9V3D4	IDGF2_DROME	Idgf2	Chitinase-like protein Idgf2	315093	451073	462299	461124	484903	427526	451942	335633
sp|Q9V3D6|CPSF2_DROME	Q9V3D6	CPSF2_DROME	Cpsf100	Probable cleavage and polyadenylation specificity factor subunit 2	426676	516835	396779	492726	379073	472221	287445	265907
sp|Q9V3G1|RL8_DROME	Q9V3G1	RL8_DROME	RpL8	60S ribosomal protein L8	566041	311923	581740	314369	530137	283030	573044	333720
sp|Q9V3G3|PPIE_DROME	Q9V3G3	PPIE_DROME	cyp33	Peptidyl-prolyl cis-trans isomerase E	427746	434528	398148	411182	396784	460812	373184	467335
sp|Q9V3G6|CNO10_DROME	Q9V3G6	CNO10_DROME	CG18616	CCR4-NOT transcription complex subunit 10 homolog	420066	422855	387114	401519	439460	416456	486543	445308
sp|Q9V3G7|PSMD6_DROME	Q9V3G7	PSMD6_DROME	Rpn7	26S proteasome non-ATPase regulatory subunit 6	396409	461839	381849	412731	418105	426498	418194	456364
sp|Q9V3H2|PSDE_DROME	Q9V3H2	PSDE_DROME	Rpn11	26S proteasome non-ATPase regulatory subunit 14	489255	387391	424871	375888	540221	359310	465354	396473
sp|Q9V3H8|NXT1_DROME	Q9V3H8	NXT1_DROME	Nxt1	NTF2-related export protein	341624	376834	401579	388575	452468	581633	506259	487453
sp|Q9V3J1-2|VATH_DROME	Q9V3J1-2	VATH_DROME	VhaSFD	Isoform B of V-type proton ATPase subunit H	324886	470934	373958	504141	392997	490102	360498	403193
sp|Q9V3L6|NCBP2_DROME	Q9V3L6	NCBP2_DROME	Cbp20	Nuclear cap-binding protein subunit 2	456186	382280	503529	349487	469603	395547	473898	424215
sp|Q9V3P0|PRDX1_DROME	Q9V3P0	PRDX1_DROME	Jafrac1	Peroxiredoxin 1	375070	486896	362081	424758	408627	431046	392096	467201
sp|Q9V3P6|PSMD1_DROME	Q9V3P6	PSMD1_DROME	Rpn2	26S proteasome non-ATPase regulatory subunit 1	384700	443316	400866	443609	397195	413094	413583	455987
sp|Q9V3S0|CP4G1_DROME	Q9V3S0	CP4G1_DROME	Cyp4g1	Cytochrome P450 4g1	289581	459926	385019	811864	271341	309284	142383	304100
sp|Q9V3S9|BGM_DROME	Q9V3S9	BGM_DROME	bgm	Very long-chain-fatty-acid--CoA ligase bubblegum	359914	464552	347704	526266	362072	432739	348392	431068
sp|Q9V3T9|ADRO_DROME	Q9V3T9	ADRO_DROME	dare	NADPH:adrenodoxin oxidoreductase, mitochondrial	469933	362326	473715	381791	503081	402499	525927	351913
sp|Q9V3U0|BGML_DROME	Q9V3U0	BGML_DROME	CG4500	Long-chain-fatty-acid--CoA ligase bubblegum-like	208918	512264	262697	691063	220080	518928	221581	497226
sp|Q9V3W6|INX7_DROME	Q9V3W6	INX7_DROME	Inx7	Innexin inx7	490412	354517	528143	427881	589481	335658	442671	243092
sp|Q9V3Y2|DRE2_DROME	Q9V3Y2	DRE2_DROME	CIAPIN1	Anamorsin homolog	389964	513430	356678	391418	362736	446851	329831	532965
sp|Q9V3Y3|DFP_DROME	Q9V3Y3	DFP_DROME	l(2)34Fc	Defense protein l(2)34Fc	408126	371118	316387	682292	364809	372713	274559	383357
sp|Q9V3Z6|MYO7A_DROME	Q9V3Z6	MYO7A_DROME	ck	Myosin-VIIa	619414	334441	528139	313205	489057	341698	501681	328640
sp|Q9V411|NOG1_DROME	Q9V411	NOG1_DROME	CG8801	Probable nucleolar GTP-binding protein 1	267195	553456	272628	482700	225258	564323	272516	623751
sp|Q9V419|C28A5_DROME	Q9V419	C28A5_DROME	Cyp28a5	Probable cytochrome P450 28a5	151977	624492	193524	810469	145982	547297	174685	332805
sp|Q9V429-2|THIO2_DROME	Q9V429-2	THIO2_DROME	Trx-2	Isoform Short of Thioredoxin-2	507904	381751	495391	358512	540655	319629	468739	357691
sp|Q9V431|API5_DROME	Q9V431	API5_DROME	Aac11	Apoptosis inhibitor 5 homolog	514432	419760	442213	378279	461866	382392	443073	344827
sp|Q9V447|KRH2_DROME	Q9V447	KRH2_DROME	Kr-h2	Krueppel homolog 2	440635	417937	454564	389364	411225	392231	461314	427423
sp|Q9V460|SPT5H_DROME	Q9V460	SPT5H_DROME	Spt5	Transcription elongation factor SPT5	472457	483888	427432	412264	376442	399584	371771	354667
sp|Q9V461|MCM6_DROME	Q9V461	MCM6_DROME	Mcm6	DNA replication licensing factor Mcm6	340360	394181	356081	412569	548535	558959	450026	457164
sp|Q9V468|Y9776_DROME	Q9V468	Y9776_DROME	CG9776	Zinc finger matrin-type protein CG9776	450733	383441	442090	409731	439267	406932	444825	430477
sp|Q9V4C8|HCF_DROME	Q9V4C8	HCF_DROME	Hcf	Host cell factor	500885	378784	466407	366898	504674	374207	459945	383472
sp|Q9V4F9|MED26_DROME	Q9V4F9	MED26_DROME	MED26	Mediator of RNA polymerase II transcription subunit 26	451942	370281	413015	381122	522646	463139	436955	436373
sp|Q9V4I0|CP9B1_DROME	Q9V4I0	CP9B1_DROME	Cyp9b1	Cytochrome P450 9b1	223211	553622	280328	699029	229502	491907	217974	394102
sp|Q9V4I1|CP9B2_DROME	Q9V4I1	CP9B2_DROME	Cyp9b2	Cytochrome P450 9b2	116419	660270	209403	757182	105486	534644	131830	461051
sp|Q9V4Q8|RU2A_DROME	Q9V4Q8	RU2A_DROME	U2A	Probable U2 small nuclear ribonucleoprotein A'	456941	421392	448718	377517	391316	450218	406256	439604
sp|Q9V4T5|CP4E1_DROME	Q9V4T5	CP4E1_DROME	Cyp4e1	Probable cytochrome P450 4e1	569624	264438	622109	274126	589863	283089	697332	298208
sp|Q9V4U7|C6A14_DROME	Q9V4U7	C6A14_DROME	Cyp6a14	Probable cytochrome P450 6a14	176091	528849	298011	829165	200226	357005	213615	374926
sp|Q9V4U9|C6A13_DROME	Q9V4U9	C6A13_DROME	Cyp6a13	Probable cytochrome P450 6a13	111675	624437	151320	693523	130954	619766	145641	608379
sp|Q9V4W1|GLE1_DROME	Q9V4W1	GLE1_DROME	GLE1	Nucleoporin GLE1	339206	507698	317373	471665	314553	561099	313137	482949
sp|Q9V521|PRPA3_DROME	Q9V521	PRPA3_DROME	proPo-A3	Phenoloxidase subunit A3	386884	444699	390686	530012	479034	334675	311446	384354
sp|Q9V535|RBM8A_DROME	Q9V535	RBM8A_DROME	tsu	RNA-binding protein 8A	479567	419528	397249	386335	475568	386551	405740	439661
sp|Q9V558|CP4P1_DROME	Q9V558	CP4P1_DROME	Cyp4p1	Cytochrome P450 4p1	282241	492547	291748	517617	337793	514511	341323	527922
sp|Q9V564|COG6_DROME	Q9V564	COG6_DROME	CG1968	Conserved oligomeric Golgi complex subunit 6	434301	386741	415718	403526	459582	402850	498880	436321
sp|Q9V576|WUN_DROME	Q9V576	WUN_DROME	wun	Putative phosphatidate phosphatase	554202	303430	581096	321896	519395	324417	592385	315997
sp|Q9V597|RL31_DROME	Q9V597	RL31_DROME	RpL31	60S ribosomal protein L31	581619	298024	593169	298778	550422	275860	578935	335765
sp|Q9V5C6|PSA3_DROME	Q9V5C6	PSA3_DROME	Prosalpha7	Proteasome subunit alpha type-3	419463	457957	402063	446882	383781	379187	398572	424732
sp|Q9V5P6|NOP10_DROME	Q9V5P6	NOP10_DROME	CG7637	H/ACA ribonucleoprotein complex subunit 3	321473	483638	333580	507764	274890	427387	365936	550956
sp|Q9V5Z7|AQP_DROME	Q9V5Z7	AQP_DROME	Drip	Aquaporin	237795	560675	322663	599385	234643	551582	224602	434413
sp|Q9V637|PSMF1_DROME	Q9V637	PSMF1_DROME	PI31	Proteasome inhibitor PI31 subunit	468273	429535	464347	476763	382689	411379	347894	302191
sp|Q9V668|S61G1_DROME	Q9V668	S61G1_DROME	SEC61G1	Protein transport protein Sec61 gamma-1 subunit	350092	505941	370329	470742	366404	523454	317996	400203
sp|Q9V674|CP6G1_DROME	Q9V674	CP6G1_DROME	Cyp6g1	Cytochrome P450 6g1	115427	582720	216552	906158	125459	443579	117209	388300
sp|Q9V677|ECM29_DROME	Q9V677	ECM29_DROME	CG8858	Proteasome-associated protein ECM29 homolog	431578	431367	427405	412813	433315	374356	440863	419058
sp|Q9V6B9|NUP54_DROME	Q9V6B9	NUP54_DROME	Nup54	Probable nucleoporin Nup54	351070	458485	371828	472750	344907	526340	311410	488238
sp|Q9V6D6|CP301_DROME	Q9V6D6	CP301_DROME	Cyp301a1	Probable cytochrome P450 301a1, mitochondrial	481887	405038	423717	368322	469642	380687	453707	435720
sp|Q9V6G5|TAZ_DROME	Q9V6G5	TAZ_DROME	Taz	Tafazzin homolog	494822	324724	516454	329981	537356	348419	589432	388574
sp|Q9V6K1|TPP2_DROME	Q9V6K1	TPP2_DROME	TppII	Tripeptidyl-peptidase 2	431719	415581	440501	415633	453363	394719	443107	394757
sp|Q9V6U8|UBA3_DROME	Q9V6U8	UBA3_DROME	Uba3	Nedd8-activating enzyme E1 catalytic subunit	473543	426194	445207	362150	440840	383047	431629	433637
sp|Q9V6U9|MECR_DROME	Q9V6U9	MECR_DROME	CG16935	Probable trans-2-enoyl-CoA reductase, mitochondrial	567362	254874	615398	291129	602242	291900	694001	282612
sp|Q9V6X7|OFUT1_DROME	Q9V6X7	OFUT1_DROME	O-fut1	GDP-fucose protein O-fucosyltransferase 1	422481	400659	426513	412025	416097	442631	454114	437874
sp|Q9V6Y3|RT16_DROME	Q9V6Y3	RT16_DROME	mRpS16	Probable 28S ribosomal protein S16, mitochondrial	471344	331113	438240	348248	561707	403970	560758	428123
sp|Q9V719|SIN1_DROME	Q9V719	SIN1_DROME	Sin1	Stress-activated map kinase-interacting protein 1	425045	377828	438462	417783	430007	472485	459637	413608
sp|Q9V726|CPSF1_DROME	Q9V726	CPSF1_DROME	Cpsf160	Cleavage and polyadenylation specificity factor subunit 1	382669	445410	364789	466739	389485	459063	349876	474345
sp|Q9V770|C6A17_DROME	Q9V770	C6A17_DROME	Cyp6a17	Probable cytochrome P450 6a17	229661	504058	302970	681973	295862	506599	288259	361698
sp|Q9V771|C6A23_DROME	Q9V771	C6A23_DROME	Cyp6a23	Probable cytochrome P450 6a23	102091	564816	174976	898292	121690	535036	155495	405503
sp|Q9V773|C6A20_DROME	Q9V773	C6A20_DROME	Cyp6a20	Probable cytochrome P450 6a20	64886.5	721469	90329	726249	72808.2	733087	100363	519790
sp|Q9V774|C6A21_DROME	Q9V774	C6A21_DROME	Cyp6a21	Probable cytochrome P450 6a21	288270	417605	406642	656109	398980	389615	301191	352078
sp|Q9V778|ADAS_DROME	Q9V778	ADAS_DROME	CG10253	Alkyldihydroxyacetonephosphate synthase	475889	449865	482472	361852	460801	486391	305566	353476
sp|Q9V784|SAM50_DROME	Q9V784	SAM50_DROME	CG7639	SAM50-like protein CG7639	545992	332985	486880	322185	545620	379804	550306	354698
sp|Q9V785|3BP5H_DROME	Q9V785	3BP5H_DROME	pcs	SH3 domain-binding protein 5 homolog	372168	380135	405522	496138	450706	537655	343700	403569
sp|Q9V7D2|VATD1_DROME	Q9V7D2	VATD1_DROME	Vha36-1	V-type proton ATPase subunit D 1	393226	417733	495037	441215	450624	418628	424556	335846
sp|Q9V7G5|C4AA1_DROME	Q9V7G5	C4AA1_DROME	Cyp4aa1	Probable cytochrome P450 4aa1	496396	823827	871818	378265	103363	40716.5	32276.6	28285.3
sp|Q9V7H4|TM131_DROME	Q9V7H4	TM131_DROME	CG8370	Transmembrane protein 131 homolog	388206	440304	374552	422357	425532	453745	417937	469229
sp|Q9V7N5-2|VATC_DROME	Q9V7N5-2	VATC_DROME	Vha44	Isoform A of V-type proton ATPase subunit C	308875	461526	409740	540818	343841	476785	346667	392191
sp|Q9V7P1|UTP18_DROME	Q9V7P1	UTP18_DROME	wcd	U3 small nucleolar RNA-associated protein 18 homolog	249212	595690	238194	527095	211005	539706	221395	605875
sp|Q9V7S5|PICO_DROME	Q9V7S5	PICO_DROME	Picot	Putative inorganic phosphate cotransporter	319198	425799	338850	493546	385035	437520	497193	486491
sp|Q9V7U0|RESIL_DROME	Q9V7U0	RESIL_DROME	resilin	Pro-resilin	426963	398975	524972	481631	470430	317373	377118	311168
sp|Q9V7Y2|SGPL_DROME	Q9V7Y2	SGPL_DROME	Sply	Sphingosine-1-phosphate lyase	269569	513743	328517	612850	255472	452800	274456	458883
sp|Q9V813|MTAP_DROME	Q9V813	MTAP_DROME	Mtap	S-methyl-5'-thioadenosine phosphorylase	355066	505607	367149	509575	331478	418856	304594	440276
sp|Q9V818|MTH3_DROME	Q9V818	MTH3_DROME	mthl3	Probable G-protein coupled receptor Mth-like 3	365076	428436	435959	435850	404585	428860	400873	471911
sp|Q9V831|APC10_DROME	Q9V831	APC10_DROME	APC10	Anaphase-promoting complex subunit 10	435956	434261	347361	349822	494215	544143	338388	512270
sp|Q9V8I2|LTOR2_DROME	Q9V8I2	LTOR2_DROME	CG5189	Ragulator complex protein LAMTOR2 homolog	401009	448247	408515	421011	412612	434699	392848	444831
sp|Q9V8K2|EXOC3_DROME	Q9V8K2	EXOC3_DROME	sec6	Exocyst complex component 3	425873	408078	435072	392156	473366	396693	474947	421681
sp|Q9V8M2|C12B2_DROME	Q9V8M2	C12B2_DROME	Cyp12b2	Probable cytochrome P450 12b2, mitochondrial	309183	497343	339255	536420	355919	450930	349464	427022
sp|Q9V8M5|3HIDH_DROME	Q9V8M5	3HIDH_DROME	CG15093	Probable 3-hydroxyisobutyrate dehydrogenase, mitochondrial	317889	444315	374144	597409	342326	401161	350199	404042
sp|Q9V8R9|41_DROME	Q9V8R9	41_DROME	cora	Protein 4.1 homolog	446097	381601	469120	399385	461900	407305	447728	408251
sp|Q9V8W3|RABEP_DROME	Q9V8W3	RABEP_DROME	Rep	Rab proteins geranylgeranyltransferase component A	419129	441775	410006	416312	434815	476760	421174	372922
sp|Q9V8Y2|OB56A_DROME	Q9V8Y2	OB56A_DROME	Obp56a	General odorant-binding protein 56a	612512	567226	510426	274660	497053	188521	265269	314530
sp|Q9V979|CP6U1_DROME	Q9V979	CP6U1_DROME	Cyp6u1	Probable cytochrome P450 6u1	415541	380272	438487	406483	516007	448679	505833	363152
sp|Q9V9A7|MCCB_DROME	Q9V9A7	MCCB_DROME	l(2)04524	Probable methylcrotonoyl-CoA carboxylase beta chain, mitochondrial	357920	442616	383263	551400	356956	415524	384238	377968
sp|Q9V9E3|PREP_DROME	Q9V9E3	PREP_DROME	CG3107	Presequence protease, mitochondrial	332103	429444	357111	476114	378694	498054	420334	489137
sp|Q9V9J3|SRC42_DROME	Q9V9J3	SRC42_DROME	Src42A	Tyrosine-protein kinase Src42A	433621	390899	373762	404191	427374	431991	488582	485904
sp|Q9V9K7|SRRT_DROME	Q9V9K7	SRRT_DROME	Ars2	Serrate RNA effector molecule homolog	418672	449338	405272	410583	393489	448395	373157	459426
sp|Q9V9S7|SYDE_DROME	Q9V9S7	SYDE_DROME	RhoGAP100F	Rho GTPase-activating protein 100F	308341	335011	349730	679749	281190	455634	420847	437309
sp|Q9V9S8|HEMH_DROME	Q9V9S8	HEMH_DROME	FeCh	Ferrochelatase, mitochondrial	452033	364930	450994	396825	488274	402909	525069	381682
sp|Q9V9X4|MTNA_DROME	Q9V9X4	MTNA_DROME	CG11334	Methylthioribose-1-phosphate isomerase	416464	501772	385358	510203	328742	385096	289374	382350
sp|Q9V9Z1|RM32_DROME	Q9V9Z1	RM32_DROME	mRpL32	39S ribosomal protein L32, mitochondrial	561654	313781	471728	342021	543305	353707	496919	406078
sp|Q9V9Z9|EBP2_DROME	Q9V9Z9	EBP2_DROME	CG1542	Probable rRNA-processing protein EBP2 homolog	164328	587781	183855	584649	155726	657097	169297	685736
sp|Q9VA02|DHTK1_DROME	Q9VA02	DHTK1_DROME	CG1544	Probable 2-oxoglutarate dehydrogenase E1 component DHKTD1 homolog, mitochondrial	236036	488374	264962	682519	247438	519958	265693	461198
sp|Q9VA38|WARTS_DROME	Q9VA38	WARTS_DROME	wts	Serine/threonine-protein kinase Warts	376657	325875	417708	406556	497780	520044	621744	405694
sp|Q9VA73-2|CMC_DROME	Q9VA73-2	CMC_DROME	aralar1	Isoform 2 of Calcium-binding mitochondrial carrier protein Aralar1	227996	551466	287503	644681	239930	505602	267508	422968
sp|Q9VA91|RS7_DROME	Q9VA91	RS7_DROME	RpS7	40S ribosomal protein S7	546272	303416	584886	318837	530882	294271	600486	334278
sp|Q9VAD6|COG7_DROME	Q9VAD6	COG7_DROME	Cog7	Conserved oligomeric Golgi complex subunit 7	463866	470120	511990	439414	422781	344020	470257	185197
sp|Q9VAI1|CIA30_DROME	Q9VAI1	CIA30_DROME	CG7598	Probable complex I intermediate-associated protein 30, mitochondrial	562781	304242	543676	336515	578243	275693	621103	292000
sp|Q9VAI6|OB99B_DROME	Q9VAI6	OB99B_DROME	Obp99b	General odorant-binding protein 99b	303166	525762	327781	643157	269046	378390	237488	414279
sp|Q9VAJ4|OB99A_DROME	Q9VAJ4	OB99A_DROME	Obp99a	General odorant-binding protein 99a	369032	453049	485917	462285	432008	353264	258895	459967
sp|Q9VAL0|SPCS1_DROME	Q9VAL0	SPCS1_DROME	Spase12	Signal peptidase complex subunit 1	382630	458532	406597	452264	380695	421121	391921	434788
sp|Q9VAM6|CISD2_DROME	Q9VAM6	CISD2_DROME	CG1458	CDGSH iron-sulfur domain-containing protein 2 homolog	441553	370548	421849	400035	443813	465047	489238	426746
sp|Q9VAM9|MESH1_DROME	Q9VAM9	MESH1_DROME	Mesh1	Guanosine-3',5'-bis(diphosphate) 3'-pyrophosphohydrolase MESH1	447290	444669	461412	329320	493632	402954	394794	448752
sp|Q9VAN0|SERC_DROME	Q9VAN0	SERC_DROME	CG11899	Probable phosphoserine aminotransferase	330540	488509	388142	590158	278435	438043	269038	390541
sp|Q9VAN6|SLBP_DROME	Q9VAN6	SLBP_DROME	Slbp	Histone RNA hairpin-binding protein	470674	436774	365643	354038	424096	430206	465998	477086
sp|Q9VAP3|CTLH2_DROME	Q9VAP3	CTLH2_DROME	CG11880	CTL-like protein 2	361499	536464	354436	448219	394133	461943	363509	383001
sp|Q9VAQ5|DIM1_DROME	Q9VAQ5	DIM1_DROME	CG11837	Probable dimethyladenosine transferase	327144	503171	311767	452175	289437	539788	300889	586246
sp|Q9VAQ7|SLU7_DROME	Q9VAQ7	SLU7_DROME	Slu7	Pre-mRNA-splicing factor Slu7	506295	387034	475468	374995	412509	381021	426177	424968
sp|Q9VAS7|INX3_DROME	Q9VAS7	INX3_DROME	Inx3	Innexin inx3	478252	341451	508279	367160	546764	373657	473459	386394
sp|Q9VAU9|ZN330_DROME	Q9VAU9	ZN330_DROME	Noa36	Zinc finger protein 330 homolog	478640	319471	526215	318413	563005	320498	621567	404995
sp|Q9VAW5|LARP_DROME	Q9VAW5	LARP_DROME	larp	La-related protein	529072	290000	553241	318830	562779	303764	623804	367061
sp|Q9VAY3|MFRN_DROME	Q9VAY3	MFRN_DROME	mfrn	Mitoferrin	616091	264849	595917	247234	648754	262060	676274	298771
sp|Q9VAY7|FAM50_DROME	Q9VAY7	FAM50_DROME	CG12259	Protein FAM50 homolog	469528	417001	395091	384539	428783	439003	409222	456725
sp|Q9VB08|RING1_DROME	Q9VB08	RING1_DROME	Sce	E3 ubiquitin-protein ligase RING1	504872	418335	468153	368642	390227	379353	424232	413877
sp|Q9VBG6|FA203_DROME	Q9VBG6	FA203_DROME	CG6073	FAM203 family protein CG6073	485803	418975	460180	357178	457651	370055	411921	431960
sp|Q9VBP3|TNKS_DROME	Q9VBP3	TNKS_DROME	Tnks	Tankyrase	696628	290601	652392	231810	643167	220795	589197	210848
sp|Q9VBP9|NPL4_DROME	Q9VBP9	NPL4_DROME	Npl4	Nuclear protein localization protein 4 homolog	339021	489232	360798	471327	363538	454877	367604	466126
sp|Q9VBV5|SIL1_DROME	Q9VBV5	SIL1_DROME	CG10420	Nucleotide exchange factor SIL1	459758	341346	500904	332905	624689	393370	535319	362808
sp|Q9VBX1|NEMF_DROME	Q9VBX1	NEMF_DROME	Clbn	Nuclear export mediator factor NEMF homolog	352463	513401	365569	473332	322249	447588	329382	462954
sp|Q9VC49|RPAB5_DROME	Q9VC49	RPAB5_DROME	Rpb10	DNA-directed RNA polymerases I, II, and III subunit RPABC5	356156	512353	336890	443911	310093	447537	327597	551056
sp|Q9VC57|ATLAS_DROME	Q9VC57	ATLAS_DROME	atl	Atlastin	444172	397456	442647	396732	440422	367422	501431	424786
sp|Q9VC61-2|CRERF_DROME	Q9VC61-2	CRERF_DROME	CG13624	Isoform 2 of Protein CREBRF homolog	357004	475271	418672	489851	412849	479679	321820	349397
sp|Q9VCA2|ORCT_DROME	Q9VCA2	ORCT_DROME	Orct	Organic cation transporter protein	232665	559307	245554	693952	185317	445681	203396	494144
sp|Q9VCA5|SYFB_DROME	Q9VCA5	SYFB_DROME	CG5706	Probable phenylalanine--tRNA ligase beta subunit	426408	436326	421364	409794	405293	421321	395419	448704
sp|Q9VCA8|ANKHM_DROME	Q9VCA8	ANKHM_DROME	mask	Ankyrin repeat and KH domain-containing protein mask	509851	362817	462993	342863	494757	372797	508414	415929
sp|Q9VCA9|SPCS3_DROME	Q9VCA9	SPCS3_DROME	Spase22-23	Signal peptidase complex subunit 3	382007	452988	415056	477805	366902	392132	393768	421157
sp|Q9VCC0|CHRD1_DROME	Q9VCC0	CHRD1_DROME	CHORD	Cysteine and histidine-rich domain-containing protein	511834	415073	465065	354780	417163	343331	493406	394180
sp|Q9VCC3|RT24_DROME	Q9VCC3	RT24_DROME	mRpS24	28S ribosomal protein S24, mitochondrial	489172	314168	487601	366008	499491	411678	535727	404944
sp|Q9VCD0|GATB_DROME	Q9VCD0	GATB_DROME	CG5463	Glutamyl-tRNA(Gln) amidotransferase subunit B, mitochondrial	448567	338284	452229	365041	482469	439101	566238	431047
sp|Q9VCE1|BECN1_DROME	Q9VCE1	BECN1_DROME	Atg6	Beclin-1-like protein	457488	366399	515465	361920	511229	400108	479704	376698
sp|Q9VCE8|U692_DROME	Q9VCE8	U692_DROME	CG33108	UPF0692 protein CG33108	561267	367905	519043	309042	549021	355538	505139	311504
sp|Q9VCG3|OPA32_DROME	Q9VCG3	OPA32_DROME	CG13601	Putative OPA3-like protein CG13603	514600	380819	498746	331237	520304	365362	525986	335332
sp|Q9VCG4|NDC1_DROME	Q9VCG4	NDC1_DROME	Ndc1	Nucleoporin Ndc1	297447	489126	296648	523501	291371	534475	272700	566075
sp|Q9VCI0|ORN_DROME	Q9VCI0	ORN_DROME	CG10214	Probable oligoribonuclease	436691	377880	407378	403360	457429	427812	511478	432290
sp|Q9VCI3|LSD1_DROME	Q9VCI3	LSD1_DROME	Lsd-1	Lipid storage droplets surface-binding protein 1	339435	474246	400884	524042	318480	456560	286729	444706
sp|Q9VCK0|EI3D1_DROME	Q9VCK0	EI3D1_DROME	eIF-3p66	Eukaryotic translation initiation factor 3 subunit D-1	390639	391660	412150	376651	500855	437398	483814	490369
sp|Q9VCP0|ELOA1_DROME	Q9VCP0	ELOA1_DROME	EloA	Transcription elongation factor B polypeptide 3	310121	503774	297407	489348	348496	576603	316147	481704
sp|Q9VCR6|SAV_DROME	Q9VCR6	SAV_DROME	sav	Scaffold protein salvador	435101	387423	424256	388782	493100	453664	432449	436311
sp|Q9VCU5|MTG1_DROME	Q9VCU5	MTG1_DROME	CG17141	Mitochondrial ribosome-associated GTPase 1	461997	324512	449642	379451	435899	455734	569116	434496
sp|Q9VCU7|VRET_DROME	Q9VCU7	VRET_DROME	vret	Protein vreteno	656787	269079	714642	269023	482353	199999	661405	245375
sp|Q9VCU9|DCR1_DROME	Q9VCU9	DCR1_DROME	Dcr-1	Endoribonuclease Dcr-1	379066	449268	360173	470671	368322	446634	372563	479369
sp|Q9VCW1|CP6D4_DROME	Q9VCW1	CP6D4_DROME	Cyp6d4	Probable cytochrome P450 6d4	381265	446665	385903	526366	351736	380399	370185	418630
sp|Q9VCX3|RM45_DROME	Q9VCX3	RM45_DROME	mRpL45	Probable 39S ribosomal protein L45, mitochondrial	492650	358946	484496	351618	488275	364545	579437	366564
sp|Q9VCX4|RRF2M_DROME	Q9VCX4	RRF2M_DROME	EF-G2	Ribosome-releasing factor 2, mitochondrial	440154	377201	441364	371033	477825	430606	538272	410182
sp|Q9VCY3|CSN6_DROME	Q9VCY3	CSN6_DROME	CSN6	COP9 signalosome complex subunit 6	338188	417766	365503	433544	464557	477844	424021	511850
sp|Q9VCY8-2|ADRL_DROME	Q9VCY8-2	ADRL_DROME	AdipoR	Isoform 2 of Adiponectin receptor protein	644918	378537	683030	243918	665006	271661	391609	168926
sp|Q9VD25|RPC6_DROME	Q9VD25	RPC6_DROME	CG5380	Probable DNA-directed RNA polymerase III subunit RPC6	385157	490771	369678	429747	362912	446319	388696	455883
sp|Q9VD26|ZFPL1_DROME	Q9VD26	ZFPL1_DROME	CG5382	Zinc finger protein-like 1 homolog	395922	419012	419143	455423	393593	421337	415319	436140
sp|Q9VD51|DDX18_DROME	Q9VD51	DDX18_DROME	pit	Probable ATP-dependent RNA helicase pitchoune	212013	578267	222532	536667	207353	603445	211166	648307
sp|Q9VD92|ARCH_DROME	Q9VD92	ARCH_DROME	CG6353	Protein archease-like	230722	627634	227539	500779	253910	529933	223164	608995
sp|Q9VDD1|DDRGK_DROME	Q9VDD1	DDRGK_DROME	CG5862	DDRGK domain-containing protein 1	413167	446157	432137	426004	361858	402598	388140	460329
sp|Q9VDD7|S35B1_DROME	Q9VDD7	S35B1_DROME	meigo	Solute carrier family 35 member B1 homolog	379670	473708	394516	449193	407286	328344	446601	440116
sp|Q9VDD9|TRM72_DROME	Q9VDD9	TRM72_DROME	CG7009	Putative tRNA (cytidine(32)/guanosine(34)-2'-O)-methyltransferase 2	394292	420554	352437	399656	458678	468281	407406	529002
sp|Q9VDE5|PPAN_DROME	Q9VDE5	PPAN_DROME	ppan	Protein Peter pan	218402	544960	226261	556272	221162	605380	246946	620194
sp|Q9VDE6|EXOC6_DROME	Q9VDE6	EXOC6_DROME	sec15	Exocyst complex component 6	443063	406284	416115	403430	465261	434247	492368	371898
sp|Q9VDG2|RLIP_DROME	Q9VDG2	RLIP_DROME	Rlip	RalA-binding protein 1	489538	341838	484774	366004	550204	370441	504381	377315
sp|Q9VDL1|U483_DROME	Q9VDL1	U483_DROME	CG5412	UPF0483 protein CG5412	495875	417991	424073	318113	471622	434732	452041	442785
sp|Q9VDM6|EI3G2_DROME	Q9VDM6	EI3G2_DROME	eIF3-S4-2	Eukaryotic translation initiation factor 3 subunit G-2	488900	323707	482725	347090	532218	353144	551741	433204
sp|Q9VDQ7|NAA25_DROME	Q9VDQ7	NAA25_DROME	psidin	Phagocyte signaling-impaired protein	424706	409962	418289	367265	418196	423906	472778	502816
sp|Q9VDR1|MED25_DROME	Q9VDR1	MED25_DROME	MED25	Mediator of RNA polymerase II transcription subunit 25	473545	355859	445709	381992	479812	433428	444408	440508
sp|Q9VDS5|RG92B_DROME	Q9VDS5	RG92B_DROME	RhoGAP92B	Rho GTPase-activating protein 92B	350996	419605	412248	478252	379239	495598	364582	456334
sp|Q9VDS6|SURF6_DROME	Q9VDS6	SURF6_DROME	Surf6	Surfeit locus protein 6 homolog	223633	561475	233918	538348	202156	618092	219775	632388
sp|Q9VDT6|RRMJ1_DROME	Q9VDT6	RRMJ1_DROME	CG11447	Putative ribosomal RNA methyltransferase CG11447	487738	300013	490083	347524	489852	518315	572536	364536
sp|Q9VDV3|NUPL1_DROME	Q9VDV3	NUPL1_DROME	Nup58	Probable nucleoporin Nup58	293244	479003	304068	498219	339937	588944	273301	548494
sp|Q9VDW6|DMDA_DROME	Q9VDW6	DMDA_DROME	Dys	Dystrophin, isoforms A/C/F/G/H	468945	394798	436527	371888	438943	428475	483639	416499
sp|Q9VDY1|INO80_DROME	Q9VDY1	INO80_DROME	Ino80	Putative DNA helicase Ino80	503731	397599	431157	369861	477396	400895	409131	420192
sp|Q9VE00|C12A4_DROME	Q9VE00	C12A4_DROME	Cyp12a4	Probable cytochrome P450 12a4, mitochondrial	99808.4	709486	166679	872392	131869	493688	126847	270305
sp|Q9VE01|C12A5_DROME	Q9VE01	C12A5_DROME	Cyp12a5	Probable cytochrome P450 12a5, mitochondrial	208947	855445	202723	498838	253132	445961	258550	336291
sp|Q9VE04|RM55_DROME	Q9VE04	RM55_DROME	mRpL55	39S ribosomal protein L55, mitochondrial	616997	363944	572216	290937	479330	297063	506519	307785
sp|Q9VE09|GATA_DROME	Q9VE09	GATA_DROME	gatA	Glutamyl-tRNA(Gln) amidotransferase subunit A, mitochondrial	521508	289250	531285	346811	509137	342696	616844	371690
sp|Q9VE11|U488_DROME	Q9VE11	U488_DROME	CG14286	UPF0488 protein CG14286	548086	340859	562359	291616	514977	325436	559980	360464
sp|Q9VE34|EPG5_DROME	Q9VE34	EPG5_DROME	CG14299	Ectopic P granules protein 5 homolog	349577	461084	377132	486757	367361	456113	412475	418753
sp|Q9VE50|GOSR1_DROME	Q9VE50	GOSR1_DROME	Gos28	Golgi SNAP receptor complex member 1	376413	463546	368222	478868	356018	420454	331400	493138
sp|Q9VE51|CPSF3_DROME	Q9VE51	CPSF3_DROME	Cpsf73	Cleavage and polyadenylation specificity factor 73	426052	400034	464792	421280	409219	440307	404497	417679
sp|Q9VEA5|RPB4_DROME	Q9VEA5	RPB4_DROME	Rpb4	DNA-directed RNA polymerase II 16 kDa polypeptide	438361	391246	507728	377232	492382	421049	409548	392323
sp|Q9VEB3|RPF2_DROME	Q9VEB3	RPF2_DROME	CG7993	Ribosome production factor 2 homolog	301652	522334	290848	472399	278074	594603	275705	565020
sp|Q9VEC1|MED17_DROME	Q9VEC1	MED17_DROME	MED17	Mediator of RNA polymerase II transcription subunit 17	396576	398890	429146	419799	421824	393723	487541	464759
sp|Q9VEC3|ARP5_DROME	Q9VEC3	ARP5_DROME	Arp5	Actin-related protein 5	467668	432543	470134	440201	403415	471669	490839	196062
sp|Q9VED0|TAPT1_DROME	Q9VED0	TAPT1_DROME	CG7218	Protein TAPT1 homolog	281194	456368	322320	705820	405027	369644	311092	311428
sp|Q9VEG9|NRM_DROME	Q9VEG9	NRM_DROME	nrm	Nurim homolog	466728	386348	539352	402095	491952	398770	365203	333814
sp|Q9VEJ2|NOP14_DROME	Q9VEJ2	NOP14_DROME	l(3)07882	Nucleolar protein 14 homolog	259634	536851	258725	495548	249029	605846	246048	626345
sp|Q9VEP1|TRM71_DROME	Q9VEP1	TRM71_DROME	CG5220	Putative tRNA (cytidine(32)/guanosine(34)-2'-O)-methyltransferase 1	412005	430509	387278	403032	425225	365522	460013	505074
sp|Q9VES1|AR6P1_DROME	Q9VES1	AR6P1_DROME	CG10326	ARL-6-interacting protein 1 homolog	389522	417576	386945	446620	464660	462964	384458	438355
sp|Q9VEX5|ASUN_DROME	Q9VEX5	ASUN_DROME	Asun	Protein asunder	396142	413320	389992	455781	393862	479283	382261	459113
sp|Q9VEX9|SAP18_DROME	Q9VEX9	SAP18_DROME	Bin1	Histone deacetylase complex subunit SAP18	438805	392975	437307	407855	465040	402887	399597	454844
sp|Q9VEZ5|IKKB_DROME	Q9VEZ5	IKKB_DROME	ird5	Inhibitor of nuclear factor kappa-B kinase subunit beta	406536	439705	391735	426366	388061	458673	403186	454738
sp|Q9VF08|TIM16_DROME	Q9VF08	TIM16_DROME	blp	Mitochondrial import inner membrane translocase subunit Tim16	442936	373262	475512	344989	486825	408382	537030	428768
sp|Q9VF26|SPNE_DROME	Q9VF26	SPNE_DROME	spn-E	Probable ATP-dependent RNA helicase spindle-E	117340	623343	145024	526632	146054	741553	167981	778411
sp|Q9VF71|CUTC_DROME	Q9VF71	CUTC_DROME	CG6136	Copper homeostasis protein cutC homolog	548713	390901	451866	326414	516046	375932	464925	373570
sp|Q9VF78|COG2_DROME	Q9VF78	COG2_DROME	ldlCp	Conserved oligomeric Golgi complex subunit 2	430356	419677	438290	403157	427026	408452	423383	436525
sp|Q9VF87|CYFIP_DROME	Q9VF87	CYFIP_DROME	Sra-1	Cytoplasmic FMR1-interacting protein	407802	408064	399147	474917	395920	394068	428291	436112
sp|Q9VF89|RM09_DROME	Q9VF89	RM09_DROME	mRpL9	39S ribosomal protein L9, mitochondrial	494678	317707	500294	336812	522228	362698	608316	394171
sp|Q9VFB7|TPC10_DROME	Q9VFB7	TPC10_DROME	SIDL	Trafficking protein particle complex subunit 10	472158	386158	458216	401945	449079	362409	497707	380772
sp|Q9VFC0|SCC4_DROME	Q9VFC0	SCC4_DROME	CG4203	MAU2 chromatid cohesion factor homolog	443855	385682	451716	415787	414012	436058	429912	423223
sp|Q9VFC8|GYS_DROME	Q9VFC8	GYS_DROME	CG6904	Putative glycogen [starch] synthase	371597	367729	442665	443199	562366	400909	524435	360551
sp|Q9VFE6|RRP15_DROME	Q9VFE6	RRP15_DROME	CG3817	RRP15-like protein	169541	621091	176923	584305	147968	605156	163747	679521
sp|Q9VFJ2|RM11_DROME	Q9VFJ2	RM11_DROME	mRpL11	39S ribosomal protein L11, mitochondrial	506560	329386	490449	349021	519697	329755	585116	391566
sp|Q9VFJ3|HTRA2_DROME	Q9VFJ3	HTRA2_DROME	HtrA2	Serine protease HTRA2, mitochondrial	394506	396939	380167	483959	408758	442038	407211	448911
sp|Q9VFL5|SYMM_DROME	Q9VFL5	SYMM_DROME	Aats-met	Methionine--tRNA ligase, mitochondrial	492653	338786	534157	309109	531904	464135	556195	330597
sp|Q9VFM9|TWF_DROME	Q9VFM9	TWF_DROME	twf	Twinfilin	530407	370080	544094	337396	514263	353437	443595	342029
sp|Q9VFP1|CP6D5_DROME	Q9VFP1	CP6D5_DROME	Cyp6d5	Probable cytochrome P450 6d5	80873.7	636649	121649	943455	110458	590861	110332	301335
sp|Q9VFP2|RDX_DROME	Q9VFP2	RDX_DROME	rdx	Protein roadkill	408517	382263	498301	377072	440235	470446	451550	429616
sp|Q9VFR0|BCCIP_DROME	Q9VFR0	BCCIP_DROME	CG9286	Protein BCCIP homolog	369129	501261	369066	394718	337294	449086	334656	573511
sp|Q9VFR1|F206_DROME	Q9VFR1	F206_DROME	CG9288	FAM206 family protein CG9288	483340	388113	451270	344952	469006	370110	480739	458718
sp|Q9VFS5|PP4R3_DROME	Q9VFS5	PP4R3_DROME	flfl	Serine/threonine-protein phosphatase 4 regulatory subunit 3	499377	360819	457358	371168	481469	354371	512473	410956
sp|Q9VFS8|PSMD9_DROME	Q9VFS8	PSMD9_DROME	CG9588	26S proteasome non-ATPase regulatory subunit 9	422611	426551	391004	430580	403744	423758	405235	460539
sp|Q9VG73|ILF2_DROME	Q9VG73	ILF2_DROME	CG5641	Interleukin enhancer-binding factor 2 homolog	422293	420282	398018	409060	393955	483445	401999	467024
sp|Q9VG76|MYCBP_DROME	Q9VG76	MYCBP_DROME	CG17202	C-Myc-binding protein homolog	433609	425046	412148	426631	405594	379255	437802	438989
sp|Q9VG82|CP9F2_DROME	Q9VG82	CP9F2_DROME	Cyp9f2	Probable cytochrome P450 9f2	191669	617427	274096	691955	186469	510711	183451	393068
sp|Q9VG93|GSTT7_DROME	Q9VG93	GSTT7_DROME	GstD7	Glutathione S-transferase D7	188474	529072	215959	783176	167558	457053	189299	497308
sp|Q9VG95|GSTT5_DROME	Q9VG95	GSTT5_DROME	GstD5	Glutathione S-transferase D5	394339	524807	601629	514451	263216	281066	222472	294141
sp|Q9VG97|GSTT3_DROME	Q9VG97	GSTT3_DROME	GstD3	Glutathione S-transferase D3	679200	314397	583428	238821	575659	259952	553554	305881
sp|Q9VG98|GSTT2_DROME	Q9VG98	GSTT2_DROME	GstD2	Glutathione S-transferase D2	317092	497853	408128	544773	347537	375399	388375	357368
sp|Q9VGC3|COG1_DROME	Q9VGC3	COG1_DROME	CG4848	Conserved oligomeric Golgi complex subunit 1	409437	423834	442824	413509	425886	417413	444650	414085
sp|Q9VGH1|CP315_DROME	Q9VGH1	CP315_DROME	sad	Cytochrome P450 315a1, mitochondrial	556155	443257	375110	373246	411420	379225	430548	383397
sp|Q9VGH7-6|CLCN2_DROME	Q9VGH7-6	CLCN2_DROME	ClC-a	Isoform G of Chloride channel protein 2	183344	520751	254510	646731	183294	675431	182152	544826
sp|Q9VGI8|BLM_DROME	Q9VGI8	BLM_DROME	Blm	Bloom syndrome protein homolog	177602	609768	183820	506057	225905	667547	202529	684144
sp|Q9VGK7|ELP1_DROME	Q9VGK7	ELP1_DROME	Elp1	Putative elongator complex protein 1	348858	497100	329383	446394	363212	472032	334089	529133
sp|Q9VGN9|RLP24_DROME	Q9VGN9	RLP24_DROME	RpL24-like	Probable ribosome biogenesis protein RLP24	285844	525797	319093	495711	243690	524046	290271	573319
sp|Q9VGP1|ZFY26_DROME	Q9VGP1	ZFY26_DROME	CG5270	Zinc finger FYVE domain-containing protein 26 homolog	347112	420418	410375	459507	425232	462094	416074	447781
sp|Q9VGP6|PFD3_DROME	Q9VGP6	PFD3_DROME	CG6719	Probable prefoldin subunit 3	444941	435985	475393	321949	400382	407826	470498	473524
sp|Q9VGQ9|DPH3_DROME	Q9VGQ9	DPH3_DROME	CG14701	DPH3 homolog	284587	551110	280972	467877	349185	496848	349998	524313
sp|Q9VGR2|NDUF7_DROME	Q9VGR2	NDUF7_DROME	CG17726	NADH dehydrogenase [ubiquinone] complex I, assembly factor 7 homolog	447646	378648	463842	363920	468140	393986	546425	412137
sp|Q9VGR7|Y6693_DROME	Q9VGR7	Y6693_DROME	CG6693	J domain-containing protein CG6693	460458	412166	470573	350843	419473	439986	412338	453077
sp|Q9VGS2|TCTP_DROME	Q9VGS2	TCTP_DROME	Tctp	Translationally-controlled tumor protein homolog	466790	404184	457256	329840	499987	363669	489804	448779
sp|Q9VGU5|TTC14_DROME	Q9VGU5	TTC14_DROME	CG6621	Tetratricopeptide repeat protein 14 homolog	353895	404216	354029	481617	424788	460565	400207	502782
sp|Q9VGW6|MCM5_DROME	Q9VGW6	MCM5_DROME	Mcm5	DNA replication licensing factor Mcm5	426002	430096	404507	411767	360110	492173	348435	490543
sp|Q9VGX3|FAU_DROME	Q9VGX3	FAU_DROME	fau	Protein anoxia up-regulated	613223	328025	666257	417904	667847	225115	205688	177870
sp|Q9VGX3-3|FAU_DROME	Q9VGX3-3	FAU_DROME	fau	Isoform C of Protein anoxia up-regulated	466211	372140	583672	537611	513765	292685	264846	209319
sp|Q9VGY5|MET15_DROME	Q9VGY5	MET15_DROME	CG14683	Probable methyltransferase-like protein 15 homolog	463809	380339	422020	363088	524433	417475	535770	386720
sp|Q9VGZ0|C12E1_DROME	Q9VGZ0	C12E1_DROME	Cyp12e1	Probable cytochrome P450 12e1, mitochondrial	268855	522065	283458	546551	352807	497908	280711	501516
sp|Q9VGZ1|CK5P1_DROME	Q9VGZ1	CK5P1_DROME	CG6345	CDK5RAP1-like protein	541947	337575	461928	331097	535022	355808	573755	373181
sp|Q9VH07|RUVB1_DROME	Q9VH07	RUVB1_DROME	pont	RuvB-like helicase 1	445290	444793	409050	426454	410922	389024	393190	416494
sp|Q9VH38|TFB2M_DROME	Q9VH38	TFB2M_DROME	mtTFB2	Dimethyladenosine transferase 2, mitochondrial	454084	374708	464829	367745	430072	438221	509338	425164
sp|Q9VH39|NDUF4_DROME	Q9VH39	NDUF4_DROME	CG11722	Protein NDUFAF4 homolog	537273	405786	541005	335991	506626	313447	474508	293421
sp|Q9VH48|CARM1_DROME	Q9VH48	CARM1_DROME	Art4	Probable histone-arginine methyltransferase CARMER	431636	439442	393076	400937	432924	411044	425448	449376
sp|Q9VH69|RS29_DROME	Q9VH69	RS29_DROME	RpS29	40S ribosomal protein S29	562597	292943	723676	284638	488360	225781	565677	336780
sp|Q9VH78|ALG12_DROME	Q9VH78	ALG12_DROME	CG8412	Probable Dol-P-Man:Man(7)GlcNAc(2)-PP-Dol alpha-1,6-mannosyltransferase	417054	402310	454523	397334	454094	394615	499551	410227
sp|Q9VH90|TRBID_DROME	Q9VH90	TRBID_DROME	trbd	Ubiquitin thioesterase trabid	479710	329558	477631	340076	489824	450366	535598	427021
sp|Q9VH95|YC17_DROME	Q9VH95	YC17_DROME	CG16817	Uncharacterized protein CG16817	476505	393989	462732	328665	518579	382795	492035	420229
sp|Q9VHA0|SCM_DROME	Q9VHA0	SCM_DROME	Scm	Polycomb protein Scm	513661	359345	477006	330439	531928	442902	475381	369288
sp|Q9VHB3|USB1_DROME	Q9VHB3	USB1_DROME	CG16790	U6 snRNA phosphodiesterase	349174	510481	293654	418612	356466	480656	343584	585607
sp|Q9VHB6|MTX1_DROME	Q9VHB6	MTX1_DROME	CG9393	Metaxin-1 homolog	441629	407996	423336	396559	455011	407475	483946	406524
sp|Q9VHD3|MAAI1_DROME	Q9VHD3	MAAI1_DROME	GstZ1	Probable maleylacetoacetate isomerase 1	420052	414392	396503	426838	392582	476182	444938	427224
sp|Q9VHF2|PTER_DROME	Q9VHF2	PTER_DROME	CG18473	Phosphotriesterase-related protein	88886.3	616710	226879	972934	156038	340113	127989	287024
sp|Q9VHH7|ADAL_DROME	Q9VHH7	ADAL_DROME	Ada	Adenosine deaminase-like protein	416144	362328	502964	321488	547832	467459	537218	404528
sp|Q9VHH9|JHD1_DROME	Q9VHH9	JHD1_DROME	Kdm2	JmjC domain-containing histone demethylation protein 1	408702	389724	425029	446006	408294	435900	454499	427837
sp|Q9VHI4|SF3B5_DROME	Q9VHI4	SF3B5_DROME	CG11985	Probable splicing factor 3B subunit 5	520369	401590	507247	396406	421952	262850	419677	392622
sp|Q9VHN6|RM19_DROME	Q9VHN6	RM19_DROME	mRpL19	39S ribosomal protein L19, mitochondrial	492544	329880	502122	331686	518133	361188	586939	402912
sp|Q9VHP0|DDX3_DROME	Q9VHP0	DDX3_DROME	bel	ATP-dependent RNA helicase bel	534681	333171	547919	347264	517995	294675	558081	333270
sp|Q9VHR8|DPP3_DROME	Q9VHR8	DPP3_DROME	DppIII	Dipeptidyl peptidase 3	407043	436159	389605	427998	407626	445580	439977	428695
sp|Q9VHS2|COX7A_DROME	Q9VHS2	COX7A_DROME	CG9603	Probable cytochrome c oxidase subunit 7A, mitochondrial	468781	510104	415830	576834	263831	297718	257034	286470
sp|Q9VHS7|COQ2_DROME	Q9VHS7	COQ2_DROME	Coq2	4-hydroxybenzoate polyprenyltransferase, mitochondrial	534956	280522	479208	286659	620077	349423	698046	385478
sp|Q9VHU1|DDX55_DROME	Q9VHU1	DDX55_DROME	CG9630	Probable ATP-dependent RNA helicase DDX55 homolog	342651	530736	332311	390337	337598	487843	312508	596501
sp|Q9VHV5|ARL8_DROME	Q9VHV5	ARL8_DROME	Gie	ADP-ribosylation factor-like protein 8	401691	407857	466618	427966	458381	347622	495327	388982
sp|Q9VI10|SMD2_DROME	Q9VI10	SMD2_DROME	SmD2	Probable small nuclear ribonucleoprotein Sm D2	461548	408744	451355	406544	426244	387435	418846	412187
sp|Q9VI25|NCDN_DROME	Q9VI25	NCDN_DROME	Neurochondrin	Neurochondrin homolog	570876	368470	533578	307438	538389	307995	458184	358552
sp|Q9VI55|UFL1_DROME	Q9VI55	UFL1_DROME	CG1104	E3 UFM1-protein ligase 1 homolog	401158	400262	418437	428301	416109	419580	456294	462150
sp|Q9VI82|NOC3L_DROME	Q9VI82	NOC3L_DROME	CG1234	Nucleolar complex protein 3 homolog	259485	587499	245953	488244	212473	562185	235101	636094
sp|Q9VIF0|NOC2L_DROME	Q9VIF0	NOC2L_DROME	CG9246	Nucleolar complex protein 2 homolog	235411	563929	246914	505069	209129	581030	214979	678978
sp|Q9VIF1|MUT7_DROME	Q9VIF1	MUT7_DROME	CG9247	Probable exonuclease mut-7 homolog	486988	380018	502736	375372	473651	364248	503751	343652
sp|Q9VIL0|BRU_DROME	Q9VIL0	BRU_DROME	bru	Protein brunelleschi	426164	379753	464570	406515	492909	373209	478574	409829
sp|Q9VIM5|ARPC2_DROME	Q9VIM5	ARPC2_DROME	Arpc2	Actin-related protein 2/3 complex subunit 2	400309	414426	397602	452879	400926	438040	405639	455777
sp|Q9VIP8|VLS_DROME	Q9VIP8	VLS_DROME	vls	Protein valois	257331	485899	227933	445141	430848	604076	419617	578530
sp|Q9VIU7|DPM1_DROME	Q9VIU7	DPM1_DROME	CG10166	Probable dolichol-phosphate mannosyltransferase	406899	451876	423981	446315	377337	398453	454972	379117
sp|Q9VIW7|RTCB_DROME	Q9VIW7	RTCB_DROME	CG9987	tRNA-splicing ligase RtcB homolog	416816	437487	392867	401708	412607	439207	412383	474664
sp|Q9VJ26|EFHD2_DROME	Q9VJ26	EFHD2_DROME	Swip-1	EF-hand domain-containing protein D2 homolog	475552	418780	412851	504844	271168	449556	366921	360379
sp|Q9VJ34|GSTCD_DROME	Q9VJ34	GSTCD_DROME	CG10428	Glutathione S-transferase C-terminal domain-containing protein homolog	412852	420918	405870	391046	456127	415418	433121	480616
sp|Q9VJ38|RM13_DROME	Q9VJ38	RM13_DROME	mRpL13	39S ribosomal protein L13, mitochondrial	512180	314785	482189	328952	533530	366423	617531	392347
sp|Q9VJ87|CWC22_DROME	Q9VJ87	CWC22_DROME	ncm	Pre-mRNA-splicing factor CWC22 homolog	329620	465138	357420	485652	378813	494385	362489	461590
sp|Q9VJ97|JMJD4_DROME	Q9VJ97	JMJD4_DROME	CG7200	JmjC domain-containing protein 4 homolog	423029	417111	418873	361299	460179	451170	472774	453543
sp|Q9VJC7|EFTS_DROME	Q9VJC7	EFTS_DROME	CG6412	Elongation factor Ts, mitochondrial	618102	326320	586507	324301	491353	291220	512515	286185
sp|Q9VJI9|NUBP1_DROME	Q9VJI9	NUBP1_DROME	CG17904	Cytosolic Fe-S cluster assembly factor NUBP1 homolog	382181	507872	325994	396829	385374	488611	379578	496487
sp|Q9VJQ4|MCES_DROME	Q9VJQ4	MCES_DROME	l(2)35Bd	mRNA cap guanine-N7 methyltransferase	429192	425509	410490	350497	460035	424207	454819	491024
sp|Q9VJY6|RL24_DROME	Q9VJY6	RL24_DROME	RpL24	60S ribosomal protein L24	579687	324117	622056	299504	506391	260715	565741	314723
sp|Q9VJZ7|RRP1L_DROME	Q9VJZ7	RRP1L_DROME	Nnp-1	Ribosomal RNA processing protein 1 homolog	285828	548232	272225	506032	252824	557396	257447	564914
sp|Q9VK89|TRM1_DROME	Q9VK89	TRM1_DROME	CG6388	Probable tRNA (guanine(26)-N(2))-dimethyltransferase	471682	355072	475405	355196	522733	399992	474831	427415
sp|Q9VKB4|RPF1_DROME	Q9VKB4	RPF1_DROME	CG6712	Probable ribosome production factor 1	461795	414246	370937	369420	446067	460795	463272	457723
sp|Q9VKB9|RBGPR_DROME	Q9VKB9	RBGPR_DROME	rab3-GAP	Rab3 GTPase-activating protein regulatory subunit	367122	453377	387949	469190	407715	454971	395891	409353
sp|Q9VKD3|NFS1_DROME	Q9VKD3	NFS1_DROME	CG12264	Probable cysteine desulfurase, mitochondrial	328161	506051	330015	485066	308017	508188	349099	479843
sp|Q9VKH0|COG8_DROME	Q9VKH0	COG8_DROME	CG6488	Conserved oligomeric Golgi complex subunit 8	405345	403502	438192	405431	433351	466002	446451	430121
sp|Q9VKH6|PPT2_DROME	Q9VKH6	PPT2_DROME	Ppt2	Lysosomal thioesterase PPT2 homolog	323354	539358	358255	388354	326636	572002	355185	501400
sp|Q9VKJ0|HGD_DROME	Q9VKJ0	HGD_DROME	hgo	Homogentisate 1,2-dioxygenase	313061	372959	416431	566110	407799	470850	445256	368242
sp|Q9VKJ3|NU160_DROME	Q9VKJ3	NU160_DROME	Nup160	Nuclear pore complex protein Nup160 homolog	320373	496279	310745	509882	318124	524895	281220	513758
sp|Q9VKK1|EDC4_DROME	Q9VKK1	EDC4_DROME	Ge-1	Enhancer of mRNA-decapping protein 4 homolog	382252	483071	364310	482841	355829	422416	358525	431705
sp|Q9VKK2|WDR59_DROME	Q9VKK2	WDR59_DROME	CG4705	WD repeat-containing protein 59 homolog	305033	444011	360014	473888	426783	475731	432753	473352
sp|Q9VKN7|AURKB_DROME	Q9VKN7	AURKB_DROME	ial	Aurora kinase B	29246.8	753272	47059.3	695268	32335.1	649418	41719.4	743151
sp|Q9VKQ6|SMG8_DROME	Q9VKQ6	SMG8_DROME	CG6729	Protein SMG8	378421	500019	381105	428563	388448	496440	388591	385698
sp|Q9VKV5|CD2B2_DROME	Q9VKV5	CD2B2_DROME	holn1	CD2 antigen cytoplasmic tail-binding protein 2 homolog	438238	443113	389936	406087	406303	433610	438526	424093
sp|Q9VL13|MOB3_DROME	Q9VL13	MOB3_DROME	Mob3	MOB kinase activator-like 3	421278	358873	370785	375917	522201	418502	541612	507941
sp|Q9VL18|EF1D_DROME	Q9VL18	EF1D_DROME	eEF1delta	Probable elongation factor 1-delta	515471	363888	494659	329414	525443	360488	506071	382617
sp|Q9VL72|SMRCD_DROME	Q9VL72	SMRCD_DROME	Etl1	SWI/SNF-related matrix-associated actin-dependent regulator of chromatin subfamily A containing DEAD/H box 1 homolog	348512	439961	398223	405647	405380	497581	409744	512418
sp|Q9VL78|FKB59_DROME	Q9VL78	FKB59_DROME	FKBP59	FK506-binding protein 59	419158	452257	400493	404527	403208	407671	394184	476288
sp|Q9VL92|CP4E3_DROME	Q9VL92	CP4E3_DROME	Cyp4e3	Cytochrome P450 4e3	358740	604701	284585	590099	335075	446677	236367	258241
sp|Q9VL96|PESC_DROME	Q9VL96	PESC_DROME	CG4364	Pescadillo homolog	274369	563171	247596	489045	212010	598953	242843	622075
sp|Q9VLC1|FUCTB_DROME	Q9VLC1	FUCTB_DROME	FucTB	Alpha-(1,3)-fucosyltransferase B	373217	401723	412395	474170	390103	441297	392138	473941
sp|Q9VLD6|BOREA_DROME	Q9VLD6	BOREA_DROME	borr	Borealin	96093.9	702213	106923	620861	100446	635317	132053	695278
sp|Q9VLJ9|RM51_DROME	Q9VLJ9	RM51_DROME	mRpL51	39S ribosomal protein L51, mitochondrial	571268	436520	486960	293517	536063	380420	386690	324801
sp|Q9VLK2|Y3096_DROME	Q9VLK2	Y3096_DROME	CG13096	Ribosomal L1 domain-containing protein CG13096	316437	529366	315309	456486	280990	543535	289879	557981
sp|Q9VLL0|ACSF4_DROME	Q9VLL0	ACSF4_DROME	U26	Acyl-CoA synthetase family member 4 homolog	318838	547126	321227	516181	298291	402953	319342	484693
sp|Q9VLM5|DAD1_DROME	Q9VLM5	DAD1_DROME	l(2)k12914	Dolichyl-diphosphooligosaccharide--protein glycosyltransferase subunit DAD1	371855	523170	370373	444346	361784	417990	316547	466769
sp|Q9VLM8|SYAC_DROME	Q9VLM8	SYAC_DROME	Aats-ala	Alanine--tRNA ligase, cytoplasmic	469653	423997	442898	332068	495445	375969	419514	469271
sp|Q9VLP3|MSS4_DROME	Q9VLP3	MSS4_DROME	CG7787	Guanine nucleotide exchange factor MSS4 homolog	514624	375931	456260	357183	478442	350672	523491	388795
sp|Q9VLP9|PORED_DROME	Q9VLP9	PORED_DROME	CG7840	Polyprenol reductase	417662	436677	387180	417575	369685	459983	477143	425673
sp|Q9VLR5|TCP4_DROME	Q9VLR5	TCP4_DROME	Ssb-c31a	RNA polymerase II transcriptional coactivator	303643	619579	280135	528279	216698	451944	222964	505096
sp|Q9VLS9|LACB2_DROME	Q9VLS9	LACB2_DROME	CG12375	Beta-lactamase-like protein 2 homolog	348762	446469	368001	470229	369723	472816	388636	484437
sp|Q9VLT1|MON2_DROME	Q9VLT1	MON2_DROME	mon2	Protein MON2 homolog	386563	438965	413558	437285	396700	435054	414385	441607
sp|Q9VLT8|CCD53_DROME	Q9VLT8	CCD53_DROME	CG7429	WASH complex subunit CCDC53 homolog	499539	384039	448017	361796	455679	383503	483666	417925
sp|Q9VLU5|WWOX_DROME	Q9VLU5	WWOX_DROME	Wwox	WW domain-containing oxidoreductase	375294	437696	395279	438418	437778	456236	449956	407178
sp|Q9VLV5|RUXE_DROME	Q9VLV5	RUXE_DROME	SmE	Probable small nuclear ribonucleoprotein E	440507	385977	436088	403138	403273	429064	434323	475133
sp|Q9VM17|SOSSB_DROME	Q9VM17	SOSSB_DROME	CG5181	SOSS complex subunit B homolog	383350	463092	369155	415189	464443	476422	379826	439644
sp|Q9VM33|EFGM_DROME	Q9VM33	EFGM_DROME	ico	Elongation factor G, mitochondrial	467408	351730	466159	341715	529894	398324	575415	396786
sp|Q9VM75|HEAT1_DROME	Q9VM75	HEAT1_DROME	l(2)k09022	HEAT repeat-containing protein 1 homolog	216990	581869	233904	514704	208935	610523	207035	657206
sp|Q9VM95|AATF_DROME	Q9VM95	AATF_DROME	Aatf	Protein Aatf	158150	629009	171694	580377	122275	658806	146174	687207
sp|Q9VMA7|TGO1_DROME	Q9VMA7	TGO1_DROME	Tango1	Transport and Golgi organization protein 1	395915	409032	422678	440096	410543	426658	453202	431557
sp|Q9VMC8|PHF5_DROME	Q9VMC8	PHF5_DROME	CG9548	Uncharacterized protein CG9548	511553	389211	514644	375683	467492	357794	396080	367819
sp|Q9VMC9|KFA_DROME	Q9VMC9	KFA_DROME	KFase	Kynurenine formamidase	427928	391449	446976	461032	453479	377999	464391	351725
sp|Q9VMD9|TIG_DROME	Q9VMD9	TIG_DROME	Tig	Tiggrin	203057	566605	241385	649146	198533	534741	188378	539166
sp|Q9VMN5|CH60C_DROME	Q9VMN5	CH60C_DROME	Hsp60C	60 kDa heat shock protein homolog 2, mitochondrial	99808.6	57449.8	2.50263e+06	206022	76592.7	123263	158636	128116
sp|Q9VMQ5|COQ6_DROME	Q9VMQ5	COQ6_DROME	CG7277	Putative ubiquinone biosynthesis monooxygenase COQ6	480320	343827	501531	347882	522275	346309	611319	360067
sp|Q9VMQ7|ELP4_DROME	Q9VMQ7	ELP4_DROME	CG6907	Putative elongator complex protein 4	498395	382260	486622	354747	533322	365153	500058	336729
sp|Q9VMT5|C28D1_DROME	Q9VMT5	C28D1_DROME	Cyp28d1	Probable cytochrome P450 28d1	231797	476674	336366	718552	222674	493430	244918	396874
sp|Q9VMW7|ITPA_DROME	Q9VMW7	ITPA_DROME	CG8891	Inosine triphosphate pyrophosphatase	351657	526412	348969	477860	319838	490060	308820	440316
sp|Q9VMW8|MPU1_DROME	Q9VMW8	MPU1_DROME	CG3792	Mannose-P-dolichol utilization defect 1 protein homolog	512028	280741	521213	345550	567569	330823	644031	357961
sp|Q9VMW9|GMDS_DROME	Q9VMW9	GMDS_DROME	Gmd	GDP-mannose 4,6 dehydratase	377959	464728	387270	535207	336732	396462	316339	414792
sp|Q9VMX1|KBP_DROME	Q9VMX1	KBP_DROME	CG14043	Protein KBP homolog	447358	416047	415888	381802	516274	374108	431568	434991
sp|Q9VMX6|SMAL1_DROME	Q9VMX6	SMAL1_DROME	Marcal1	SWI/SNF-related matrix-associated actin-dependent regulator of chromatin subfamily A-like protein 1	229079	642369	254611	502813	187643	561760	217120	583867
sp|Q9VMY1|RM24_DROME	Q9VMY1	RM24_DROME	mRpL24	Probable 39S ribosomal protein L24, mitochondrial	457384	336774	471351	344787	491962	403307	583150	441284
sp|Q9VN03|SUV3_DROME	Q9VN03	SUV3_DROME	CG9791	ATP-dependent RNA helicase SUV3 homolog, mitochondrial	396945	424962	403694	422271	399348	428104	448717	465776
sp|Q9VN12|NCKXH_DROME	Q9VN12	NCKXH_DROME	CG1090	Probable sodium/potassium/calcium exchanger CG1090	297275	407570	250299	652130	291276	540347	339774	481674
sp|Q9VN14|CONT_DROME	Q9VN14	CONT_DROME	Cont	Contactin	408992	426237	415887	448371	423455	437300	379794	415307
sp|Q9VN19|GET4_DROME	Q9VN19	GET4_DROME	CG9853	Golgi to ER traffic protein 4 homolog	450678	390673	471772	348069	492974	386157	508717	420691
sp|Q9VN25|EIF3A_DROME	Q9VN25	EIF3A_DROME	eIF3-S10	Eukaryotic translation initiation factor 3 subunit A	443589	378661	460662	383353	453029	392346	487399	441572
sp|Q9VN27|LIPT2_DROME	Q9VN27	LIPT2_DROME	CG9804	Putative lipoyltransferase 2, mitochondrial	465255	360291	474003	366139	464612	399821	542921	404894
sp|Q9VN45|SPG20_DROME	Q9VN45	SPG20_DROME	spartin	Protein spartin	407291	471869	384480	390222	472235	448950	470071	370105
sp|Q9VN50|EI3F1_DROME	Q9VN50	EI3F1_DROME	eIF3-S5-1	Eukaryotic translation initiation factor 3 subunit F-1	440868	361190	440836	374208	515316	396474	502671	451939
sp|Q9VN93|CPR1_DROME	Q9VN93	CPR1_DROME	CG12163	Putative cysteine proteinase CG12163	346709	461856	380682	540955	353705	441226	346014	393030
sp|Q9VNA5|PSB4_DROME	Q9VNA5	PSB4_DROME	Prosbeta7	Proteasome subunit beta type-4	423722	409243	442954	359333	486011	439177	475922	429490
[truncated: 4,622 more rows]
