# Supplementary material for: E2F/Dp inactivation in fat body cells triggers systemic metabolic changes
Source: eLife. 2021 Jul 12;10:e67753. doi: 10.7554/eLife.67753 (PMC8298092; doi:10.7554/eLife.67753)
Supplement: Supplementary file 2. — Tandem-mass tag-mass spectrometry (TMT-MS) data were log transformed and fold change was calculated between E2f/Dp-depleted tissue and control. Only 5024 proteins detected in both tissue are displayed here. Third instar larval fat body from w1118 and Dp-/- was collected. Mef2>mCherry-RNAi and Mef2>Dp-RNAi were collected at pharate stage and thoracic muscles were dissected [file elife-67753-supp2.xls]

## Sheet: Legend
Proteomic effect of E2F/Dp loss in larval fat body and thoracic muscles.
TMT-MS data were log transformed and fold change was calculated between E2f/Dp-depleted tissue and control
Only 5024 proteins detected in both tissue are displayed here
Third instar larval fat body from w[1118] and Dp-/- were collected.
Mef2>mCherry-RNAi and Mef2>Dp-RNAi were collected at pharate stage and thoracic muscles were dissected

## Sheet: Fat body
UniprotEntry	UniprotGeneName	GeneName	ProteinDescription	logFC	P.Value	adj.P.Val
A0AQH0	A0AQH0_DROME	Prosbeta1	Proteasome_subunit_beta_type	-0.0508673	0.570071	0.677691
A0T1Z4	A0T1Z4_DROME	yrt	Yurt_gamma	0.327612	0.0524104	0.110033
A1A708	Y4951_DROME	CG4951	Uncharacterized_protein_CG4951	0.943595	4.25549e-05	0.000584141
A1A714	A1A714_DROME	CG12004	CG12004,_isoform_C	-0.431809	0.00854161	0.0274205
A1YK02	A1YK02_DROME	Nup75	Nup75	0.256625	0.0113301	0.0337218
A1Z6E6	A1Z6E6_DROME	d4	D4,_isoform_C	0.0279237	0.921738	0.950856
A1Z6F4	A1Z6F4_DROME	laccase2	CG42345,_isoform_E	-1.02252	0.01406	0.0393961
A1Z6G4	A1Z6G4_DROME	CG17508-RA	CG17508	0.0200865	0.867933	0.914826
A1Z6G6	A1Z6G6_DROME	CG1344	CG1344	-0.113266	0.239696	0.353978
A1Z6H3	A1Z6H3_DROME	vlc	Vulcan,_isoform_D	-1.06139	1.37298e-05	0.00026239
A1Z6H6	A1Z6H6_DROME	CG7791	CG7791	0.51494	0.000246495	0.00200387
A1Z6H7	A1Z6H7_DROME	Gp210	Gp210	0.54969	9.71743e-05	0.00101921
A1Z6I7	A1Z6I7_DROME	BubR1	Bub1-related_kinase	1.00119	0.00023556	0.00194967
A1Z6J2	A1Z6J2_DROME	SCAP	SCAP	0.292346	0.0150433	0.0415634
A1Z6J4	A1Z6J4_DROME	tbce	CG7861,_isoform_A	-0.0575574	0.710157	0.796568
A1Z6L1	TO402_DROME	tomboy40	Mitochondrial_import_receptor_subunit_TOM40_homolog_2	0.387017	0.0403577	0.0896501
A1Z6L9	A1Z6L9_DROME	Trap1	FI21274p1	0.143423	0.286126	0.403792
A1Z6M0	A1Z6M0_DROME	Bap170	Brahma_associated_protein_170kD	-0.160875	0.348197	0.467574
A1Z6M6	A1Z6M6_DROME	Dpit47	DNA_polymerase_interacting_tpr_containing_protein_of_47kD	0.262559	0.0359459	0.0821247
A1Z6N5	A1Z6N5_DROME	CG3270-RA	CG3270	1.33606	0.00044108	0.00304813
A1Z6P3	A1Z6P3_DROME	Eb1	Eb1,_isoform_F	-0.0647647	0.596604	0.701131
A1Z6Q0	A1Z6Q0_DROME	koi	CG3287,_isoform_B	0.133063	0.26739	0.383053
A1Z6Q1	A1Z6Q1_DROME	koi	Klaroid	0.55016	0.00152711	0.00755136
A1Z6R8	A1Z6R8_DROME	CG3358	CG3358,_isoform_C	-0.11214	0.387112	0.507
A1Z6S6	A1Z6S6_DROME	vimar	RE54322p	0.219796	0.246607	0.360771
A1Z6U3	A1Z6U3_DROME	Tsp42Ek	IP01824p	-1.27805	0.00167294	0.00810494
A1Z6U7	A1Z6U7_DROME	Tsp42Ep	Tetraspanin_42Ep	-0.868922	0.0178893	0.0471822
A1Z6V5	A1Z6V5_DROME	Spn43Ab	FI01422p	-0.30651	0.216273	0.327572
A1Z6X0	A1Z6X0_DROME	CG12164	CG12164	-0.938616	0.0268929	0.065747
A1Z6X1	A1Z6X1_DROME	Dscam1	Down_syndrome_cell_adhesion_molecule,_isoform_D	0.177256	0.380093	0.500023
A1Z6X6	A1Z6X6_DROME	CG1707	CG1707	-0.367892	0.0171125	0.0457303
A1Z6Z3	A1Z6Z3_DROME	Aldh-III	Aldehyde_dehydrogenase	-0.258634	0.159097	0.258423
A1Z6Z7	A1Z6Z7_DROME	CG1620	CG1620,_isoform_A	0.639422	0.0278763	0.0672996
A1Z713	A1Z713_DROME	Vps13	Vacuolar_protein_sorting_13	0.0520643	0.616944	0.719482
A1Z729	A1Z729_DROME	CG2064	CG2064	1.23734	1.21404e-06	4.55173e-05
A1Z734	A1Z734_DROME	CG1399	CG1399,_isoform_B	-0.0671539	0.514763	0.627863
A1Z743	A1Z743_DROME	CG30497	CG30497,_isoform_A	-0.308252	0.0726646	0.140735
A1Z757	A1Z757_DROME	phr	Photorepair,_isoform_B	1.11989	2.44737e-08	2.36454e-06
A1Z768	A1Z768_DROME	rnh1	Ribonuclease_H1,_isoform_B	0.118815	0.178227	0.282375
A1Z784	A1Z784_DROME	ACC	CG11198,_isoform_A	-1.02829	0.00141395	0.00714656
A1Z7A8	A1Z7A8_DROME	coil	Coilin,_isoform_D	0.167641	0.125505	0.215053
A1Z7C4	A1Z7C4_DROME	LRP1	CG33087	-0.17857	0.196099	0.303887
A1Z7F1	A1Z7F1_DROME	Mal-A6	CG30360	0.794148	0.0801446	0.151942
A1Z7F3	A1Z7F3_DROME	Mal-A8	CG8690	1.11931	0.0823135	0.155234
A1Z7G2	A1Z7G2_DROME	CG14752-RA	CG14752	-1.3347	0.0161748	0.0437836
A1Z7G7	LPHN_DROME	Cirl	Latrophilin_Cirl	0.297849	0.232782	0.347602
A1Z7H2	A1Z7H2_DROME	Acsl	Lethal_(2)_44DEa,_isoform_D	-0.0530296	0.743475	0.823466
A1Z7H7	A1Z7H7_DROME	CG8586-RA	CG8586	0.410571	0.092966	0.170169
A1Z7J6	A1Z7J6_DROME	sec31	Sec31,_isoform_B	-0.333959	0.00219782	0.00984636
A1Z7J7	A1Z7J7_DROME	sec31	Sec31,_isoform_A	-0.345356	0.025657	0.0635292
A1Z7K2	A1Z7K2_DROME	CG30349-RA	CG30349	0.258399	0.031993	0.0750036
A1Z7K6	A1Z7K6_DROME	CG8243-RA	CG8243	-0.514346	0.00693649	0.0233103
A1Z7K8	A1Z7K8_DROME	CG8235	CG8235	-0.21587	0.120747	0.208896
A1Z7K9	A1Z7K9_DROME	CG8232	CG8232	-0.0637614	0.436478	0.552916
A1Z7L1	A1Z7L1_DROME	FANCI	CG13745	1.74844	6.79559e-08	5.02074e-06
A1Z7M8	A1Z7M8_DROME	Ance-4	Ance-4	-2.05144	2.97799e-07	1.61926e-05
A1Z7P1	A1Z7P1_DROME	Pmm45A	Phosphomannomutase_45A,_isoform_A	0.26784	0.072208	0.140078
A1Z7P3	A1Z7P3_DROME	Phax	Phosphorylated_adaptor_for_RNA_export,_isoform_A	-0.419717	0.0211582	0.0540685
A1Z7P5	A1Z7P5_DROME	Su(var)2-10	Suppressor_of_variegation_2-10,_isoform_I	-0.0749907	0.52882	0.640654
A1Z7Q7	A1Z7Q7_DROME	Hydr1	Alpha/beta_hydrolase_1,_isoform_A	0.918681	0.0005515	0.00363348
A1Z7Q8	A1Z7Q8_DROME	alc	Alicorn	-0.257151	0.275319	0.391398
A1Z7S0	A1Z7S0_DROME	Rme-8	Receptor_mediated_endocytosis_8	0.16545	0.0556833	0.115031
A1Z7S4	A1Z7S4_DROME	CG8026	CG8026,_isoform_A	0.527537	0.0110908	0.0332659
A1Z7T0-2	PKN_DROME	Pkn	Isoform_2_of_Serine/threonine-protein_kinase_N	-0.253551	0.00612929	0.0212369
A1Z7V1	A1Z7V1_DROME	brp	Bruchpilot,_isoform_D	-0.804057	0.0361709	0.0824388
A1Z7V9	A1Z7V9_DROME	CG1814-RA	CG1814,_isoform_A	0.45005	0.00393952	0.015213
A1Z7X7	A1Z7X7_DROME	GstT2	CG30005	-0.674397	0.000416986	0.00292589
A1Z7X8	A1Z7X8_DROME	CG12926	CG12926	-1.10291	6.26717e-06	0.000154546
A1Z7Z4	A1Z7Z4_DROME	CG1648	CG1648,_isoform_B	-0.917784	0.00415743	0.0158474
A1Z803	A1Z803_DROME	CG1665-RA	CG1665	0.169396	0.208971	0.319511
A1Z813	A1Z813_DROME	sec24	Sec24	-0.381756	0.00214762	0.0097029
A1Z814	A1Z814_DROME	CG1513-RA	Oxysterol-binding_protein	-0.178776	0.0232687	0.0583926
A1Z830	A1Z830_DROME	CG12128	CG12128,_isoform_A	-0.434502	0.192914	0.299969
A1Z833	A1Z833_DROME	CG1407	Palmitoyltransferase	-0.232089	0.157856	0.25674
A1Z843	A1Z843_DROME	CG1371	CG1371	0.057237	0.575783	0.68122
A1Z847	A1Z847_DROME	CG2269	CG2269,_isoform_B	-0.322029	0.315617	0.435741
A1Z850	A1Z850_DROME	Ccs	Superoxide_dismutase_[Cu-Zn]	0.211884	0.199998	0.309357
A1Z866	A1Z866_DROME	CAP	CAP,_isoform_I	0.244772	0.0701837	0.137467
A1Z869	A1Z869_DROME	CAP	CAP,_isoform_F	0.0146387	0.936644	0.961524
A1Z876	A1Z876_DROME	Ndg	Nidogen/entactin,_isoform_B	0.52655	0.000415413	0.00291893
A1Z893	A1Z893_DROME	CG12896-RA	CG12896	0.505278	0.131387	0.222551
A1Z8A4	A1Z8A4_DROME	psq	Pipsqueak,_isoform_A	-0.776524	0.0176764	0.0467895
A1Z8A7	A1Z8A7_DROME	CG11883	CG11883,_isoform_A	0.0759168	0.682777	0.773339
A1Z8B5	A1Z8B5_DROME	CG7220-RB	CG7220,_isoform_B	0.116278	0.32925	0.449743
A1Z8D0	A1Z8D0_DROME	nclb	CG6751	-0.207229	0.104381	0.185435
A1Z8D2	A1Z8D2_DROME	CG18003-RC	CG18003,_isoform_A	-0.300782	0.250561	0.365087
A1Z8F4	A1Z8F4_DROME	shn	Schnurri,_isoform_D	-0.943691	0.00253315	0.0107943
A1Z8G7	A1Z8G7_DROME	Listericin	CG9080	0.065334	0.875618	0.920122
A1Z8H4	A1Z8H4_DROME	Cpr47Ec	Cuticular_protein_47Ec	-1.20909	0.0292992	0.0699949
A1Z8I0	A1Z8I0_DROME	CG9067	CG9067	-0.276997	0.0657602	0.131051
A1Z8J0	C19L1_DROME	CG7741	CWF19-like_protein_1_homolog	0.466746	0.00220902	0.00984672
A1Z8J8	A1Z8J8_DROME	CG30025	CG30025	-0.456998	0.48822	0.603591
A1Z8L7	A1Z8L7_DROME	CG7763	CG7763	-3.40276	3.90276e-09	5.7669e-07
A1Z8L8	A1Z8L8_DROME	CG7777	CG7777,_isoform_A	1.53996	2.47588e-05	0.0003973
A1Z8M2	A1Z8M2_DROME	tou	Toutatis,_isoform_A	-0.678312	0.0272824	0.0663929
A1Z8M8	A1Z8M8_DROME	CG9003	CG9003,_isoform_A	0.0734099	0.557471	0.667159
A1Z8N1	TRE11_DROME	Tret1-1	Facilitated_trehalose_transporter_Tret1-1	0.164151	0.324722	0.44594
A1Z8P9	TPR_DROME	Mtor	Nucleoprotein_TPR	0.107655	0.260724	0.37597
A1Z8Q0	A1Z8Q0_DROME	TwdlBeta	TwdlBeta	-1.01315	0.00658124	0.0224468
A1Z8R2	A1Z8R2_DROME	CG8290	CG8290,_isoform_A	-0.225456	0.0621821	0.125312
A1Z8R6	A1Z8R6_DROME	CG33145	CG33145,_isoform_B	-0.209966	0.0913452	0.167979
A1Z8R8	A1Z8R8_DROME	rho-7	Rhomboid-7	0.514659	0.000470855	0.00323608
A1Z8S6	A1Z8S6_DROME	pds5	Pds5	-0.175272	0.236246	0.350738
A1Z8U0	A1Z8U0_DROME	Prp8	Pre-mRNA_processing_factor_8	0.108871	0.241644	0.355529
A1Z8U4	A1Z8U4_DROME	Cct5	T-complex_chaperonin_5,_isoform_B	0.246546	0.0413637	0.0914663
A1Z8U9	A1Z8U9_DROME	RpS11	Ribosomal_protein_S11,_isoform_B	-0.0619716	0.641909	0.740687
A1Z8W8	A1Z8W8_DROME	garz	Gartenzwerg,_isoform_B	-0.336689	0.000684888	0.0042133
A1Z8Z3	A1Z8Z3_DROME	Cpr49Ag	Cuticular_protein_49Ag	-0.124308	0.79667	0.86364
A1Z904	A1Z904_DROME	Dyb	Dystrobrevin	-0.501126	0.00126219	0.00660545
A1Z909	A1Z909_DROME	CG8545-RA	CG8545	0.106438	0.225571	0.339201
A1Z910	A1Z910_DROME	CG8550	CG8550	-1.88843	4.01941e-06	0.000110787
A1Z920	A1Z920_DROME	fra	FI24025p1	-0.801219	0.00772084	0.0252043
A1Z933	A1Z933_DROME	CG33672-RA	CG33672	-0.623468	0.0643244	0.128598
A1Z934	A1Z934_DROME	CG8778	CG8778	0.512034	0.000515619	0.00343564
A1Z936	A1Z936_DROME	ZnT49B	CG8632,_isoform_A	0.317015	0.00735917	0.0243669
A1Z942	A1Z942_DROME	nemy	No_extended_memory,_isoform_E	1.37495	1.65433e-05	0.000293428
A1Z945	A1Z945_DROME	CG8771	CG8771	-0.00364139	0.965962	0.979413
A1Z979	A1Z979_DROME	CG13324	CG13324	2.44493	8.89306e-06	0.000191754
A1Z987	A1Z987_DROME	Cap-G	Cap-G,_isoform_F	0.115523	0.674967	0.767203
A1Z992	A1Z992_DROME	AGBE	CG33138	-0.71858	0.00043687	0.00302736
A1Z9A2	U587_DROME	CG4646	UPF0587_protein_CG4646	-0.370791	0.0282863	0.0680604
A1Z9A8	PTCD3_DROME	CG4679	Protein_PTCD3_homolog,_mitochondrial	0.126134	0.394837	0.513817
A1Z9C8	A1Z9C8_DROME	CG42321	CG42321,_isoform_K	-0.171535	0.0948437	0.172331
A1Z9D3	A1Z9D3_DROME	cnn	Centrosomin,_isoform_E	-0.0160802	0.916788	0.94792
A1Z9D7	A1Z9D7_DROME	arr	Arrow	-0.231884	0.234767	0.349059
A1Z9E2	LIN54_DROME	mip120	Protein_lin-54_homolog	-1.5202	2.40471e-05	0.00038722
A1Z9E3	A1Z9E3_DROME	EfTuM	Elongation_factor_Tu	0.071217	0.604563	0.708496
A1Z9F9	A1Z9F9_DROME	CG13335	CG13335,_isoform_A	0.417264	0.327728	0.448222
A1Z9G2	A1Z9G2_DROME	CG6197-RA	CG6197	0.0745399	0.431801	0.549069
A1Z9I0	A1Z9I0_DROME	CG6357	CG6357	0.276986	0.14648	0.242635
A1Z9J0	A1Z9J0_DROME	shot	Short_stop,_isoform_E	0.275415	0.0208808	0.0535004
A1Z9J3	A1Z9J3_DROME	shot	Short_stop,_isoform_H	0.453457	0.000321955	0.00241418
A1Z9J6	A1Z9J6_DROME	mRpL53	Mitochondrial_ribosomal_protein_L53	-0.497212	0.000667345	0.00415457
A1Z9K0	A1Z9K0_DROME	CG6701	CG6701	0.419561	0.0271331	0.0662052
A1Z9L3	A1Z9L3_DROME	pea	FI05376p	0.284368	0.010914	0.0328729
A1Z9L9	A1Z9L9_DROME	CG18327	CG18327	-0.517514	0.00518106	0.0186459
A1Z9M0	A1Z9M0_DROME	CG18324	CG18324,_isoform_B	-0.5081	0.000853654	0.00495238
A1Z9M2	A1Z9M2_DROME	CG8331	CG8331	-0.561893	6.57611e-05	0.000778313
A1Z9M3	A1Z9M3_DROME	cg	Combgap,_isoform_B	-1.67632	0.000154124	0.00142338
A1Z9M5	A1Z9M5_DROME	CG30069	CG30069	-0.233941	0.0601331	0.121916
A1Z9N0	A1Z9N0_DROME	opa1-like	Optic_atrophy_1-like,_isoform_A	0.214015	0.067125	0.133132
A1Z9N6	A1Z9N6_DROME	conv	Acid_labile_subunit	-0.670991	0.00715668	0.0238429
A1Z9P3	SHRM_DROME	Shroom	Protein_Shroom	0.165281	0.403793	0.522176
A1Z9R1	A1Z9R1_DROME	CG17386-RA	CG17386	1.10289	0.113954	0.199619
A1Z9R6	A1Z9R6_DROME	Asx	Additional_sex_combs,_isoform_B	-1.00902	0.000497696	0.00336077
A1Z9S6	A1Z9S6_DROME	Su(var)2-HP2	Su(Var)2-HP2,_isoform_A	-0.235873	0.341414	0.461465
A1Z9W2	A1Z9W2_DROME	CG33506-RA	CG33506	0.645017	0.000190067	0.00166069
A1Z9W4	A1Z9W4_DROME	Inr-a	LD11480p	-0.440337	0.0671488	0.133132
A1Z9X0	A1Z9X0_DROME	aPKC	Atypical_protein_kinase_C,_isoform_A	0.114794	0.515726	0.628885
A1ZA18	A1ZA18_DROME	Khc-73	Kinesin-73,_isoform_A	-0.186399	0.0417625	0.0921846
A1ZA22	A1ZA22_DROME	eIF2B-gamma	eIF2B-gamma	-0.195816	0.0214508	0.0546218
A1ZA47	ZASP_DROME	Zasp52	PDZ_and_LIM_domain_protein_Zasp	0.650116	0.0139961	0.039283
A1ZA47-2	ZASP_DROME	Zasp52	Isoform_A_of_PDZ_and_LIM_domain_protein_Zasp	-0.0216519	0.898102	0.933401
A1ZA47-4	ZASP_DROME	Zasp52	Isoform_E_of_PDZ_and_LIM_domain_protein_Zasp	0.874854	0.227198	0.341034
A1ZA67	A1ZA67_DROME	Strn-Mlck	Stretchin-Mlck,_isoform_C	0.975956	0.242434	0.356345
A1ZA72	A1ZA72_DROME	Strn-Mlck	Stretchin-Mlck,_isoform_D	-0.377658	0.0103139	0.0315381
A1ZA83	A1ZA83_DROME	CG8397	CG8397	-0.148825	0.316439	0.436276
A1ZA89	A1ZA89_DROME	Dg	Dystroglycan,_isoform_B	0.293276	0.0160762	0.0436106
A1ZA92	NOL9_DROME	CG8414	Polynucleotide_5'-hydroxyl-kinase_NOL9	0.641167	2.23405e-05	0.000365599
A1ZAA5	A1ZAA5_DROME	Got1	Glutamate_oxaloacetate_transaminase_1,_isoform_B	0.05747	0.773276	0.84713
A1ZAA9	A1ZAA9_DROME	CG10731	CG10731	0.0308328	0.754223	0.832429
A1ZAB1	A1ZAB1_DROME	lbk	Lambik	-0.668527	0.0035273	0.0139977
A1ZAB3	A1ZAB3_DROME	Ptp52F	FI18312p1	2.14352	9.58836e-08	6.59889e-06
A1ZAB5	CLU_DROME	clu	Protein_clueless	0.458668	0.00546606	0.0194762
A1ZAC0	A1ZAC0_DROME	Tsf3	FI03676p	-0.258522	0.148567	0.244885
A1ZAC7	A1ZAC7_DROME	fidipidine	Fidipidine	-0.497664	2.03299e-05	0.000340457
A1ZAE2	A1ZAE2_DROME	CG8060	CG8060	0.318273	0.00221081	0.00984672
A1ZAF5	A1ZAF5_DROME	Sema-2b	CG33960,_isoform_A	0.149605	0.64711	0.744124
A1ZAG1	A1ZAG1_DROME	CG4398	CG4398	0.347058	0.0219107	0.0556932
A1ZAH8	A1ZAH8_DROME	RpS15	Ribosomal_protein_S15,_isoform_B	-0.427085	0.00121005	0.00643312
A1ZAI3	FACR2_DROME	CG8303	Putative_fatty_acyl-CoA_reductase_CG8303	0.550546	0.0702526	0.137548
A1ZAI5	FACR1_DROME	CG5065	Putative_fatty_acyl-CoA_reductase_CG5065	-0.565221	0.0160226	0.0435308
A1ZAJ2	KIF1A_DROME	unc-104	Kinesin-like_protein_unc-104	-0.0148676	0.922656	0.950856
A1ZAJ7	A1ZAJ7_DROME	CG15615	CG15615	0.038556	0.912967	0.944747
A1ZAJ8	A1ZAJ8_DROME	CG5550-RA	CG5550	1.80894	1.28407e-06	4.7089e-05
A1ZAK3	A1ZAK3_DROME	Dek	Dek,_isoform_C	0.0328548	0.739168	0.820137
A1ZAK7	A1ZAK7_DROME	Psi	LD35640p	-0.214656	0.13759	0.230879
A1ZAN2	A1ZAN2_DROME	Ehbp1	CG15609,_isoform_G	-0.404258	0.0369796	0.0838004
A1ZAN6	A1ZAN6_DROME	RhoGEF2	RhoGEF2,_isoform_D	-0.293069	0.00655343	0.0223976
A1ZAP8	A1ZAP8_DROME	CG30460	CG30460,_isoform_C	-1.00582	0.00110703	0.00600862
A1ZAQ3	A1ZAQ3_DROME	CG30456	CG30456,_isoform_B	0.505219	0.0706689	0.138098
A1ZAQ4	A1ZAQ4_DROME	CG15611	CG15611,_isoform_A	0.5418	0.00353572	0.014009
A1ZAS3	A1ZAS3_DROME	l(2)k01209	Uridine_kinase	-0.17391	0.257836	0.37309
A1ZAT5	A1ZAT5_DROME	Tes	CG6522	-0.259577	0.113727	0.199359
A1ZAU2	A1ZAU2_DROME	CG18431-RA	CG18431	0.0953801	0.78343	0.853415
A1ZAU4	A1ZAU4_DROME	CG4847-RD	CG4847,_isoform_D	1.13984	0.00234707	0.0102358
A1ZAU8	SSP4_DROME	ssp4	Short_spindle_protein_4	-0.399272	0.017551	0.0465279
A1ZAV3	A1ZAV3_DROME	MESR4	Misexpression_suppressor_of_ras_4,_isoform_A	-0.513209	0.00423569	0.0160724
A1ZAW0	A1ZAW0_DROME	Dcr-2	Dicer-2	-0.036601	0.697615	0.78601
A1ZAW7	A1ZAW7_DROME	CG11423	CG11423	-0.108309	0.428449	0.546426
A1ZAX1	EIF3C_DROME	eIF3-S8	Eukaryotic_translation_initiation_factor_3_subunit_C	-0.320844	0.0141398	0.0395536
A1ZAX2	A1ZAX2_DROME	CG30108	CG30108	-0.0249892	0.939873	0.962675
A1ZAZ2	A1ZAZ2_DROME	CG6385	CG6385	0.248801	0.263806	0.379433
A1ZB00	A1ZB00_DROME	aft	Adrift	-0.0049968	0.973536	0.982547
A1ZB29	A1ZB29_DROME	CG5757	CG5757	1.03715	1.95243e-08	2.04354e-06
A1ZB68	A1ZB68_DROME	GstE3	FI01423p	1.14242	0.00269122	0.0113879
A1ZB70	A1ZB70_DROME	GstE5	Glutathione_S_transferase_E5	-0.141495	0.642598	0.740982
A1ZB71	A1ZB71_DROME	GstE6	Glutathione_S_transferase_E6	1.33124	6.8125e-05	0.000799673
A1ZB72	A1ZB72_DROME	GstE7	Glutathione_S_transferase_E7	0.295041	0.316603	0.436382
A1ZB77	A1ZB77_DROME	CG5174	CG5174,_isoform_J	0.0256838	0.762717	0.839775
A1ZB84	A1ZB84_DROME	CG12263-RA	CG12263	0.699621	1.15313e-05	0.000231732
A1ZB86	KLD10_DROME	slim	Kelch_domain-containing_protein_10_homolog	-0.0729253	0.649529	0.745713
A1ZBA5	A1ZBA5_DROME	mRpS28	FI07234p	0.227924	0.217521	0.328966
A1ZBB1	A1ZBB1_DROME	CG5335-RA	Galectin	1.12215	1.77884e-05	0.000307672
A1ZBB4	A1ZBB4_DROME	CG30122	CG30122,_isoform_B	0.148852	0.220134	0.332517
A1ZBD8	A1ZBD8_DROME	CG15080	CG15080	-0.474259	0.183399	0.288567
A1ZBD9	A1ZBD9_DROME	MFS15	CG15094,_isoform_A	1.09897	2.18936e-05	0.000360634
A1ZBE8	DOP1_DROME	CG15099	Protein_dopey-1_homolog	-0.193762	0.0899764	0.165887
A1ZBE9	A1ZBE9_DROME	CG15100	CG15100	0.125832	0.236766	0.350888
A1ZBG9	A1ZBG9_DROME	CG15117-RB	CG15117,_isoform_B	0.851413	0.00380952	0.014848
A1ZBH1	A1ZBH1_DROME	CG15118	CG15118,_isoform_D	-0.181357	0.201778	0.311229
A1ZBH2	A1ZBH2_DROME	CG15111	CG15111,_isoform_A	0.537769	2.84201e-05	0.000436644
A1ZBH7	A1ZBH7_DROME	hppy	Happyhour,_isoform_A	0.0717429	0.286416	0.404087
A1ZBJ2	A1ZBJ2_DROME	CG7461	CG7461	-0.420014	0.0113965	0.0338593
A1ZBK7	A1ZBK7_DROME	cer	Crammer	-0.461349	0.0839369	0.157468
A1ZBM2	A1ZBM2_DROME	TBCB	CG11242	0.00700257	0.929785	0.956534
A1ZBN3	A1ZBN3_DROME	sm	FI03683p	-0.751664	0.00226502	0.0100083
A1ZBR1	A1ZBR1_DROME	CG16898	CG16898	2.10733	1.89787e-10	7.33454e-08
A1ZBR2	A1ZBR2_DROME	18w	18_wheeler	-0.523448	0.00200084	0.0092307
A1ZBT5	MED8_DROME	MED8	Mediator_of_RNA_polymerase_II_transcription_subunit_8	-0.0608566	0.753955	0.832316
A1ZBT6	A1ZBT6_DROME	CG8929	CG8929,_isoform_C	-0.178137	0.447347	0.564408
A1ZBU8	A1ZBU8_DROME	CG18067	CG18067	-0.986319	0.00973805	0.0301772
A1ZBW0	A1ZBW0_DROME	bl	Bancal,_isoform_C	-0.242945	0.00906975	0.0287485
A1ZBW7	FAM21_DROME	CG16742	WASH_complex_subunit_FAM21_homolog	0.00445866	0.973317	0.982547
A1ZBX8	A1ZBX8_DROME	Lrt	CG11136	-0.232914	0.120232	0.208435
A2RVF0	A2RVF0_DROME	Atet	ABC_transporter_expressed_in_trachea,_isoform_C	0.615498	6.12811e-05	0.000738313
A2VEI2-2	MICU1_DROME	CG4495	Isoform_A_of_Calcium_uptake_protein_1_homolog,_mitochondrial	0.34486	0.339266	0.459303
A4IJ59	A4IJ59_DROME	mub	IP17311p	-0.0504995	0.818635	0.879936
A4UZB1	A4UZB1_DROME	magu	CG2264,_isoform_F	-0.3465	0.120687	0.208864
A4UZI6	A4UZI6_DROME	Rho1	Rho1,_isoform_C	-0.261751	0.0288945	0.0692586
A4UZL5	A4UZL5_DROME	GstS1	Glutathione_S_transferase_S1,_isoform_C	-0.190894	0.231724	0.346667
A4UZR3	A4UZR3_DROME	Treh	Trehalase,_isoform_E	0.773419	0.000192088	0.00167109
A4UZW2	A4UZW2_DROME	Sam-S	S-adenosylmethionine_synthase	0.196098	0.535857	0.646741
A4UZX7	A4UZX7_DROME	crq	Croquemort,_isoform_B	-0.00389628	0.981969	0.988525
A4UZZ4	A4UZZ4_DROME	GlyP	Phosphorylase	0.143095	0.365376	0.484596
A4V0B5	A4V0B5_DROME	nrv2	Nervana_2,_isoform_F	-0.398262	0.0559485	0.115341
A4V0N4	A4V0N4_DROME	Vha68-2	MIP16230p	0.672441	0.000151004	0.00139971
A4V0S1	A4V0S1_DROME	Syx5	Syntaxin_5,_isoform_B	-0.0313837	0.777389	0.848416
A4V110	A4V110_DROME	CaMKI	Calcium/calmodulin-dependent_protein_kinase_I,_isoform_I	-0.902285	0.000104245	0.00106808
A4V164	A4V164_DROME	Pdk1	Phosphoinositide-dependent_kinase_1,_isoform_F	-0.49562	0.000626648	0.00397189
A4V1B2	A4V1B2_DROME	Patj	Patj,_isoform_B	0.151042	0.14726	0.243527
A4V1N8	A4V1N8_DROME	Prm	FI03688p	1.29918	0.000473533	0.00324561
A4V1N9	A4V1N9_DROME	Prm	Paramyosin,_isoform_D	1.00005	0.183814	0.288769
A4V1P2	A4V1P2_DROME	orb2	Orb2,_isoform_B	-0.86096	0.00328528	0.0132735
A4V1Q0	A4V1Q0_DROME	bol	Boule,_isoform_D	0.130274	0.719102	0.80373
A4V1U5	A4V1U5_DROME	GlcAT-P	GlcAT-P,_isoform_C	0.685355	0.000760764	0.00454468
A4V1Y6	A4V1Y6_DROME	Trl	Trithorax-like,_isoform_F	-0.496593	0.232422	0.347373
A4V201	A4V201_DROME	Taf4	TBP-associated_factor_4,_isoform_D	-0.188795	0.115791	0.202131
A4V2B8	A4V2B8_DROME	CkIIalpha	Casein_kinase_IIalpha,_isoform_C	-0.176574	0.0361773	0.0824388
A4V2F2	A4V2F2_DROME	mtd	L(3)82Fd,_isoform_U	0.0414363	0.799374	0.865529
A4V2I0	A4V2I0_DROME	Ama	Amalgam,_isoform_C	-0.316029	0.233822	0.348376
A4V2J1	A4V2J1_DROME	Mlp84B	Muscle_LIM_protein_at_84B,_isoform_B	0.809466	0.003777	0.01479
A4V2J2	A4V2J2_DROME	alphaTub84D	Alpha-Tubulin_at_84D,_isoform_B	0.102286	0.237415	0.351539
A4V2K7	A4V2K7_DROME	D1	D1_chromosomal_protein,_isoform_C	0.168193	0.457181	0.573703
A4V2N5	A4V2N5_DROME	Timp	Tissue_inhibitor_of_metalloproteases,_isoform_B	-0.199147	0.204768	0.314507
A4V2S3	A4V2S3_DROME	CtBP	C-terminal_binding_protein,_isoform_B	0.100585	0.404295	0.522678
A4V2Z1	A4V2Z1_DROME	wah	CG4699,_isoform_D	-0.422705	0.00470721	0.017389
A4V303	A4V303_DROME	Cctgamma	Cctgamma,_isoform_B	0.341654	0.00510414	0.0184483
A4V370	A4V370_DROME	Mvl	FI04486p	0.278382	0.0556837	0.115031
A4V383	A4V383_DROME	ND42	NADH:ubiquinone_reductase_42kD_subunit,_isoform_B	-0.240786	0.0916327	0.168323
A4V391	A4V391_DROME	T-cp1	T-complex_protein_1_subunit_alpha	0.170519	0.130347	0.221238
A4V392	A4V392_DROME	AdipoR	CG5315,_isoform_C	-0.210915	0.114539	0.200503
A4V3G8	A4V3G8_DROME	ball	Ballchen,_isoform_B	0.651518	0.00145183	0.0072987
A4V3G9	A4V3G9_DROME	Rb97D	Ribonuclear_protein_at_97D,_isoform_C	-0.566226	0.0139959	0.039283
A4V3J5	A4V3J5_DROME	Hrb98DE	Heterogeneous_nuclear_ribonucleoprotein_at_98DE,_isoform_C	-0.238118	0.0744782	0.143584
A4V3N7	A4V3N7_DROME	CDase	Ceramidase,_isoform_B	0.97598	0.000260478	0.00208051
A4V3Q6	A4V3Q6_DROME	Ef1alpha100E	Elongation_factor_1-alpha	-0.72614	0.000263401	0.00209387
A4V3W0	A4V3W0_DROME	egh	Egghead,_isoform_C	-0.0817239	0.512624	0.626014
A4V3W1	A4V3W1_DROME	sgg	Shaggy,_isoform_J	-0.0063799	0.932606	0.958358
A4V3W8	A4V3W8_DROME	CG32795	CG32795,_isoform_C	0.382889	0.0623471	0.125544
A4V402	A4V402_DROME	MAPk-Ak2	LD26767p	-0.042395	0.668987	0.762242
A4V408	A4V408_DROME	Efr	ER_GDP-fucose_transporter,_isoform_B	-0.440577	0.352236	0.472154
A4V441	A4V441_DROME	sn	Singed,_isoform_B	0.611441	0.0175591	0.0465279
A4V448	A4V448_DROME	Gclc	Glutamate-cysteine_ligase_catalytic_subunit,_isoform_B	1.55458	1.94395e-08	2.04354e-06
A4V449	A4V449_DROME	ND75	NADH:ubiquinone_reductase_75kD_subunit,_isoform_B	-0.103211	0.532743	0.644008
A4V488	A4V488_DROME	ras	Inosine-5'-monophosphate_dehydrogenase	-0.183129	0.10644	0.188445
A4V4A1	A4V4A1_DROME	Klp10A	Klp10A,_isoform_B	0.198722	0.123075	0.211756
A4V4A5	A4V4A5_DROME	Ran	Ran,_isoform_B	0.0169254	0.847385	0.900626
A4V4F2	A4V4F2_DROME	Flo-2	Flotillin-2,_isoform_F	0.089069	0.332511	0.453211
A4V4I0	A4V4I0_DROME	Gbeta13F	G_protein_beta-subunit_13F,_isoform_B	-0.0556607	0.555733	0.665873
A4V4I8	A4V4I8_DROME	shi	Shibire,_isoform_F	0.231325	0.111971	0.196761
A4V4N7	A4V4N7_DROME	CG4678	CG4678,_isoform_G	0.0413972	0.811678	0.875079
A4V4Q7	A4V4Q7_DROME	ari-1	Ariadne,_isoform_C	-0.4763	0.00971554	0.0301488
A4V4S5	A4V4S5_DROME	car	Carnation,_isoform_B	0.0859804	0.402278	0.520913
A4V4T4	A4V4T4_DROME	sw	SD27396p	-0.0484328	0.727473	0.810202
A4V4U5	A4V4U5_DROME	slgA	Sluggish_A,_isoform_F	0.830381	0.000567746	0.00369476
A4V4V2	A4V4V2_DROME	DIP1	DISCO_interacting_protein_1,_isoform_B	0.143278	0.118965	0.206381
A4VCL2	A4VCL2_DROME	CG31145	CG31145,_isoform_C	-0.662118	0.000307434	0.00233547
A5XCL5	A5XCL5_DROME	UGP	LD36265p_(Fragment)	-0.247302	0.121161	0.209452
A8DWJ8	A8DWJ8_DROME	Nox	NADPH_oxidase	-1.55444	8.63434e-06	0.00019108
A8DY44	A8DY44_DROME	Nipped-A	Nipped-A,_isoform_D	-0.24817	0.0545323	0.113024
A8DY69	A8DY69_DROME	Lpin	CG8709,_isoform_B	-0.574093	0.00760272	0.0249322
A8DY78	A8DY78_DROME	Pdk	Pyruvate_dehydrogenase_kinase,_isoform_B	0.0102572	0.966568	0.97983
A8DY80	A8DY80_DROME	Not1	Not1,_isoform_D	-0.371714	0.00116266	0.00624175
A8DY97	A8DY97_DROME	CG30015	CG30015,_isoform_C	1.05043	0.000400091	0.00282578
A8DYB0	A8DYB0_DROME	CG13185	CG13185,_isoform_C	0.0829723	0.439154	0.555606
A8DYE0	A8DYE0_DROME	CG10249-RD	CG10249,_isoform_D	-0.733623	0.000334667	0.00247537
A8DYE2	TRPCG_DROME	Trpm	Transient_receptor_potential_cation_channel_trpm	-0.0120304	0.914114	0.945739
A8DYF7	A8DYF7_DROME	mrj	Mrj,_isoform_E	0.216239	0.0983752	0.176766
A8DYG9	A8DYG9_DROME	Pkc53E	Protein_kinase_C	0.0560401	0.795807	0.863155
A8DYH2	UFM1_DROME	CG34191	Ubiquitin-fold_modifier_1	-0.983961	0.000300414	0.00229798
A8DYI1	A8DYI1_DROME	CG30118	CG30118,_isoform_B	0.790119	4.61154e-06	0.000121718
A8DYI6	A8DYI6_DROME	l(2)03709	Lethal_(2)_03709,_isoform_E	0.108334	0.301109	0.419516
A8DYJ0	A8DYJ0_DROME	endoB	Endophilin_B,_isoform_D	-0.0585964	0.761212	0.838301
A8DYJ3	A8DYJ3_DROME	CalpA	Calpain-A,_isoform_C	0.0891686	0.493985	0.609324
A8DYL3	A8DYL3_DROME	Vrp1	Verprolin_1,_isoform_G	-0.997064	0.0117047	0.0344491
A8DYP0	A8DYP0_DROME	Unc-89	Unc-89,_isoform_C	1.48888	0.00100287	0.00558581
A8DYT1	A8DYT1_DROME	CG7337	CG7337,_isoform_D	0.204809	0.0686428	0.135081
A8DYU1	A8DYU1_DROME	CG15411	CG34394,_isoform_D	0.045645	0.648721	0.745636
A8DYW2	A8DYW2_DROME	CG31635	CG31635,_isoform_B	-0.212167	0.160815	0.260288
A8DYW8	A8DYW8_DROME	RapGAP1	Rapgap1,_isoform_H	0.975602	0.000333063	0.00246801
A8DYX8	A8DYX8_DROME	Hnf4	Hepatocyte_nuclear_factor_4,_isoform_D	-0.194014	0.143126	0.23818
A8DZ02	A8DZ02_DROME	kuz	Kuzbanian,_isoform_F	-0.0548608	0.699437	0.787533
A8DZ14	A8DZ14_DROME	Fas3	FI17828p1	-0.0830845	0.813862	0.87593
A8DZ18	A8DZ18_DROME	Lar	Leukocyte-antigen-related-like,_isoform_B	-0.0451841	0.715275	0.800878
A8DZ20	A8DZ20_DROME	RtGEF	Rho-type_guanine_exchange_factor,_isoform_D	-0.0451999	0.643233	0.741533
A8DZ24	A8DZ24_DROME	CG42748	CG42748,_isoform_D	0.298607	0.0610988	0.123476
A8DZ26	A8DZ26_DROME	CG32000	CG32000,_isoform_H	-0.165607	0.095859	0.173548
A8DZ29	A8DZ29_DROME	eIF4G	Eukaryotic_translation_initiation_factor_4G,_isoform_B	-0.0575095	0.616159	0.718732
A8E702	A8E702_DROME	mRpL28	IP19992p	-0.151796	0.271896	0.38796
A8JNI2	A8JNI2_DROME	CG7971	CG7971,_isoform_F	-0.190934	0.175315	0.279259
A8JNJ2	A8JNJ2_DROME	CG11486	CG11486,_isoform_O	-0.238895	0.14071	0.234972
A8JNJ6	A8JNJ6_DROME	kst	Karst,_isoform_E	0.865505	1.65137e-08	1.8806e-06
A8JNJ9	A8JNJ9_DROME	enc	Encore,_isoform_E	-0.371462	0.0148838	0.0412445
A8JNK1	A8JNK1_DROME	ens	Ensconsin,_isoform_F	-0.401455	0.0321813	0.0753748
A8JNK4	A8JNK4_DROME	Cip4	Cip4,_isoform_B	0.216685	0.0558408	0.115213
A8JNN0	A8JNN0_DROME	pbl	Pebble,_isoform_E	0.282864	0.266339	0.382092
A8JNN1	A8JNN1_DROME	Ect4	Ectoderm-expressed_4,_isoform_D	0.515991	0.000341294	0.00249951
A8JNN5	A8JNN5_DROME	GAPcenA	GapcenA,_isoform_B	-0.156779	0.231129	0.345902
A8JNP1	A8JNP1_DROME	Argk	Arginine_kinase,_isoform_G	0.259257	0.0598029	0.12159
A8JNP7	A8JNP7_DROME	I-2	Inhibitor-2,_isoform_B	-0.982227	8.30669e-05	0.000910221
A8JNQ4	A8JNQ4_DROME	A2bp1	Ataxin-2_binding_protein_1,_isoform_I	-0.305056	0.0872954	0.162194
A8JNS4	A8JNS4_DROME	stv	Starvin,_isoform_E	-0.0809802	0.521239	0.633915
A8JNT4	A8JNT4_DROME	Mbs	Myosin_binding_subunit,_isoform_H	0.121854	0.424468	0.541938
A8JNT7	A8JNT7_DROME	Hsc20	Lethal_(3)_72Do	0.140686	0.188502	0.29475
A8JNU2	A8JNU2_DROME	Abl	Abl_tyrosine_kinase,_isoform_B	-0.0840149	0.617367	0.719619
A8JNU6	A8JNU6_DROME	Nc73EF	Neural_conserved_at_73EF,_isoform_I	-0.149332	0.287485	0.405141
A8JNV2	A8JNV2_DROME	CG34253	CG34253	-0.933609	0.00743337	0.0245209
A8JNV5	A8JNV5_DROME	Rad9	Rad9,_isoform_B	0.634674	0.00243936	0.0105196
A8JNW5	A8JNW5_DROME	CG34261	CG34261	1.9074	6.28013e-09	8.30299e-07
A8JNX0	A8JNX0_DROME	ArfGAP3	ADP-ribosylation_factor_GTPase_activating_protein_3,_isoform_H	-0.666318	0.000107629	0.00109459
A8JNX2	A8JNX2_DROME	SPoCk	Secretory_pathway_calcium_atpase,_isoform_D	-0.108363	0.412781	0.530794
A8JQU1	A8JQU1_DROME	CG1208	CG1208,_isoform_C	2.55955	5.58454e-05	0.000689355
A8JQV8	A8JQV8_DROME	pyd	Polychaetoid,_isoform_H	-0.204927	0.141136	0.23557
A8JQW1	A8JQW1_DROME	CG8176	CG8176,_isoform_D	0.250923	0.013044	0.037362
A8JQW3	A8JQW3_DROME	Pnn	Pinin,_isoform_B	0.0789251	0.77154	0.846336
A8JQX3	A8JQX3_DROME	cu	Nocturnin,_isoform_D	-0.239078	0.300328	0.418775
A8JR05	A8JR05_DROME	cv-c	Crossveinless_c,_isoform_C	-0.228059	0.249745	0.364637
A8JR25	A8JR25_DROME	Fas1	Fasciclin_1,_isoform_D	-0.0393977	0.890968	0.929786
A8JR46	A8JR46_DROME	Ire1	Ire-1,_isoform_B	-0.763557	0.000410861	0.00289099
A8JR58	A8JR58_DROME	CG5630	CG5630,_isoform_B	-0.0284501	0.83726	0.893647
A8JR84	A8JR84_DROME	CG7029	CG7029,_isoform_C	0.231103	0.0726069	0.140678
A8JR87	A8JR87_DROME	Irk1	FI16807p1	-0.23557	0.114078	0.199766
A8JR89	A8JR89_DROME	Pli	Pellino,_isoform_B	0.127995	0.454194	0.571039
A8JR94	A8JR94_DROME	CG31140	CG31140,_isoform_D	-0.251129	0.240521	0.354676
A8JRA4	A8JRA4_DROME	CG6422	CG6422,_isoform_C	-1.66354	0.000113446	0.00112639
A8JRA6	A8JRA6_DROME	CG11819	CG34349,_isoform_B	0.577368	0.00229509	0.0101145
A8JRB1	A8JRB1_DROME	CHKov1	CHKov1,_isoform_F	0.617064	0.00135232	0.00693978
A8JRC4	A8JRC4_DROME	LpR2	LpR2,_isoform_C	0.383333	0.0526293	0.110447
A8JRD0	A8JRD0_DROME	LpR1	LpR1,_isoform_K	0.362634	0.0886821	0.164224
A8JRD6	A8JRD6_DROME	CG34291	CG34291	-1.88008	5.01494e-05	0.000638048
A8JRD7	A8JRD7_DROME	sda	Slamdance,_isoform_B	0.191102	0.241119	0.355169
A8JRE3	A8JRE3_DROME	woc	Without_children,_isoform_B	-0.115039	0.407992	0.526522
A8JRF7	A8JRF7_DROME	Doa	Darkener_of_apricot,_isoform_Q	0.752845	0.000338418	0.00249489
A8JRG9	A8JRG9_DROME	CG15531	CG15531,_isoform_B	1.51747	0.00407491	0.0156277
A8JRH3	A8JRH3_DROME	tmod	FI20012p1	-0.105531	0.534153	0.645402
A8JTM7	A8JTM7_DROME	mgl	Megalin,_isoform_A	0.0741822	0.713453	0.799372
A8JUP7	A8JUP7_DROME	Hayan	CG6361,_isoform_B	-1.3727	1.63803e-05	0.000292863
A8JUQ2	A8JUQ2_DROME	CG7378	CG7378,_isoform_B	1.00379	0.000252634	0.00203403
A8JUQ9	A8JUQ9_DROME	Vav	Vav,_isoform_C	0.0712209	0.385013	0.504777
A8JUU1	A8JUU1_DROME	Sec16	Sec16,_isoform_E	-0.568911	1.01793e-05	0.000212202
A8JUV0	SBNO_DROME	sno	Protein_strawberry_notch	-0.442599	0.00122155	0.0064632
A8JUV2	A8JUV2_DROME	Tango13	Transport_and_golgi_organization_13,_isoform_C	-0.166489	0.138081	0.231548
A8JUV3	A8JUV3_DROME	NFAT	NFAT_homolog,_isoform_B	-0.232502	0.302446	0.420911
A8JUY0	A8JUY0_DROME	Rnp4F	RNA-binding_protein_4F,_isoform_D	0.0263724	0.737884	0.819074
A8JUY3	A8JUY3_DROME	CG17209	DNA-directed_RNA_polymerase	-0.0857183	0.243433	0.357209
A8JV04	A8JV04_DROME	CG3632	CG3632,_isoform_F	-0.249216	0.105113	0.186472
A8JV09	A8JV09_DROME	pod1	Coronin	0.622721	0.00109835	0.00597845
A8JV18	A8JV18_DROME	Nup153	Nucleoporin_153,_isoform_B	-0.186307	0.197933	0.306541
A8JV19	A8JV19_DROME	CG4829	CG4829,_isoform_E	0.93387	1.54819e-06	5.40147e-05
A8JV22	A8JV22_DROME	CG1440-RC	AT08049p	0.0471066	0.676151	0.7682
A8JV30	A8JV30_DROME	CG34327-RA	CG34327	-1.0657	0.00271323	0.0114452
A8QI34	A8QI34_DROME	CG40625	CG40625	0.124822	0.407845	0.526468
A8WHF7	A8WHF7_DROME	CG6393	CG42257,_isoform_G	-0.178002	0.0773153	0.148087
A8WHL4	A8WHL4_DROME	bon	Bonus,_isoform_B	-0.016962	0.912102	0.944395
A8Y4Z5	A8Y4Z5_DROME	CG41378	CG41378,_isoform_C	0.356947	0.0122859	0.0356583
A8Y516	A8Y516_DROME	uex	Unextended,_isoform_E	-0.202645	0.0636869	0.127755
A8Y560	A8Y560_DROME	RpL15	Ribosomal_protein_L15	-0.166826	0.146466	0.242635
A8Y582	A8Y582_DROME	CG41099	CG41099,_isoform_D	0.157143	0.171936	0.275001
A8Y589	A8Y589_DROME	Alg-2	Apoptosis-linked_gene-2,_isoform_C	-0.259322	0.0459285	0.0990747
A8Y592	A8Y592_DROME	spok	Spookier	-0.584105	0.148313	0.244865
A8Y596	A8Y596_DROME	Gfat1	Glutamine:fructose-6-phosphate_aminotransferase_1,_isoform_H	-0.110809	0.77417	0.84737
B3DNL7	B3DNL7_DROME	how	Held_out_wings,_isoform_D	-0.264472	0.0814078	0.153872
B5RIM9	B5RIM9_DROME	Gpdh	FI03663p	-0.756301	0.00923159	0.0291329
B5RIR1	B5RIR1_DROME	nrv1	FI04125p	0.618509	6.7381e-05	0.000794653
B5RIU6	B5RIU6_DROME	endoA	AT06279p	-0.0234057	0.865645	0.913656
B5RJQ0	B5RJQ0_DROME	ImpL3	L-lactate_dehydrogenase	0.523987	0.107306	0.189691
B5RJS0	B5RJS0_DROME	CG4040-RA	CG42388,_isoform_E	0.643653	1.23845e-05	0.000246904
B6IDQ5	B6IDQ5_DROME	CG4603-RA	CG4603,_isoform_C	-0.371915	0.00333923	0.013421
B6IDV6	B6IDV6_DROME	Pvr	PDGF-and_VEGF-receptor_related,_isoform_G	-0.440997	0.00287784	0.0119787
B7YZD8	B7YZD8_DROME	CAP	CAP,_isoform_Q	0.369949	0.00736247	0.0243669
B7YZH7	B7YZH7_DROME	CG8446-RD	CG8446,_isoform_D	-0.35854	0.00268471	0.0113727
B7YZJ0	B7YZJ0_DROME	mbl	Muscleblind,_isoform_E	-0.602974	0.00956551	0.0298857
B7YZJ4	B7YZJ4_DROME	CG4975	CG4975,_isoform_C	0.299638	0.103787	0.184511
B7YZK4	B7YZK4_DROME	Jabba	CG42351,_isoform_E	-1.00201	9.26842e-05	0.000984451
B7YZL9	B7YZL9_DROME	Fak	Focal_adhesion_kinase,_isoform_D	-0.129718	0.226405	0.340073
B7YZM3	B7YZM3_DROME	CG30386	CG30387,_isoform_E	0.158493	0.140323	0.234681
B7YZN0	B7YZN0_DROME	Sdc	Syndecan	-0.851685	0.00180123	0.00855329
B7YZN1	B7YZN1_DROME	CG42362	CG42362	2.07238	3.28202e-10	1.03056e-07
B7YZP1	B7YZP1_DROME	MED23	Mediator_complex_subunit_23,_isoform_B	-0.119445	0.38598	0.50578
B7YZP4	B7YZP4_DROME	St3	CG5431,_isoform_B	1.46897	9.81972e-06	0.000205559
B7YZP9	B7YZP9_DROME	Mlp60A	Muscle_LIM_protein_at_60A,_isoform_B	0.886411	0.160247	0.259509
B7YZQ1	B7YZQ1_DROME	slik	Sterile20-like_kinase,_isoform_F	-0.00098084	0.990479	0.993644
B7YZQ7	B7YZQ7_DROME	Nurf-38	Nucleosome_remodeling_factor-38kD,_isoform_B	-0.0425144	0.77374	0.847269
B7YZR2	B7YZR2_DROME	Pal1	CG12130,_isoform_B	-1.18328	2.62902e-05	0.000416662
B7YZR9	B7YZR9_DROME	Updo	Uroporphyrinogen_decarboxylase	0.0632815	0.643758	0.741628
B7YZT2	B7YZT2_DROME	Fis1	CG17510,_isoform_C	0.0497783	0.654502	0.750049
B7YZU7	B7YZU7_DROME	lectin-22C	Lectin-22C	-1.50601	0.000108941	0.00110204
B7YZV6	B7YZV6_DROME	Sfmbt	Scm-related_gene_containing_four_mbt_domains,_isoform_C	-0.152952	0.430225	0.548035
B7YZW3	B7YZW3_DROME	CG13260	CG42389,_isoform_E	-0.0759474	0.510701	0.624273
B7YZX6	B7YZX6_DROME	CG10600	CG10600,_isoform_B	-0.0476982	0.701291	0.788384
B7YZX9	B7YZX9_DROME	CG31688	CG31688,_isoform_B	0.0948634	0.430864	0.548293
B7YZY0	B7YZY0_DROME	CG31678	CG31678,_isoform_C	0.124316	0.209944	0.320568
B7YZY9	B7YZY9_DROME	Su(dx)	E3_ubiquitin-protein_ligase	0.461757	0.000243869	0.00198896
B7YZZ0	B7YZZ0_DROME	CG42371-RA	CG42371	-0.110195	0.535524	0.646741
B7YZZ9	B7YZZ9_DROME	Rrp1	Recombination_repair_protein_1,_isoform_B	1.24958	1.06496e-05	0.000219277
B7Z001	B7Z001_DROME	CG3523	CG3523,_isoform_C	-0.735236	0.0608238	0.123019
B7Z002	B7Z002_DROME	kis	Kismet,_isoform_C	-0.528783	0.0150282	0.0415528
B7Z005	B7Z005_DROME	drongo	Drongo,_isoform_I	-0.335827	0.0182048	0.0478101
B7Z006	B7Z006_DROME	pgant4	Polypeptide_GalNAc_transferase_4,_isoform_B	-0.746336	0.264849	0.380607
B7Z010	B7Z010_DROME	capu	Cappuccino,_isoform_E	0.840445	0.000138682	0.00130475
B7Z025	B7Z025_DROME	PDZ-GEF	Dizzy_isoform_BII	-0.271432	0.0112538	0.0335934
B7Z028	B7Z028_DROME	CG9527	Acyl-coenzyme_A_oxidase	0.399736	0.00251878	0.0107422
B7Z031	B7Z031_DROME	pes	Peste,_isoform_C	0.0683123	0.635745	0.735432
B7Z036	B7Z036_DROME	uif	Uninflatable,_isoform_B	-0.306823	0.32043	0.44081
B7Z063	B7Z063_DROME	Rbp6	RNA-binding_protein_6,_isoform_D	-0.260073	0.226878	0.340655
B7Z066	B7Z066_DROME	frc	Fringe_connection,_isoform_B	0.899718	3.49563e-07	1.79205e-05
B7Z067	B7Z067_DROME	Nedd4	Nedd4,_isoform_I	0.263228	0.0531982	0.11113
B7Z072	B7Z072_DROME	fz2	Frizzled_2,_isoform_D	-0.0696468	0.684847	0.775002
B7Z078	B7Z078_DROME	CG8786-RC	CG8786,_isoform_C	-0.417257	0.00220526	0.00984659
B7Z090	B7Z090_DROME	Psn	Presenilin,_isoform_C	0.384796	0.00743161	0.0245209
B7Z098	B7Z098_DROME	CG7414	CG7414,_isoform_D	0.0396526	0.795665	0.863155
B7Z0A9	B7Z0A9_DROME	sowah	Sosondowah,_isoform_H	0.0727658	0.591256	0.69615
B7Z0B2	B7Z0B2_DROME	CG10359	CG10359,_isoform_E	0.689567	0.000196522	0.00169936
B7Z0B7	B7Z0B7_DROME	CG10625	CG10625,_isoform_J	0.135731	0.603144	0.707494
B7Z0B9	B7Z0B9_DROME	CG10625	CG10625,_isoform_H	-0.111084	0.617257	0.719619
B7Z0D3	B7Z0D3_DROME	CG7546	CG7546,_isoform_D	-0.11256	0.191366	0.298022
B7Z0E2	B7Z0E2_DROME	Unr	FI18812p1	-0.129595	0.327644	0.448222
B7Z0G1	B7Z0G1_DROME	hay	Haywire,_isoform_B	0.268231	0.00674967	0.0228199
B7Z0G3	B7Z0G3_DROME	CG7394	CG7394,_isoform_B	-0.555481	0.000339243	0.0024954
B7Z0I8	B7Z0I8_DROME	CG14896	CG42232	-0.025784	0.895808	0.932352
B7Z0J4	B7Z0J4_DROME	CG42375-RA	CG42375	-0.391247	0.22553	0.339201
B7Z0M9	B7Z0M9_DROME	CG15684	Oxysterol-binding_protein	0.297898	0.0420334	0.0925729
B7Z0P8	B7Z0P8_DROME	CG6364	CG6364,_isoform_B	0.00798205	0.939326	0.962311
B7Z0Q8	B7Z0Q8_DROME	Lerp	Lysosomal_enzyme_receptor_protein,_isoform_D	0.650659	0.00317479	0.0129361
B7Z0R2	B7Z0R2_DROME	spg	CG31048,_isoform_C	-0.118618	0.257133	0.372287
B7Z0T0	B7Z0T0_DROME	MP1	Melanization_protease_1,_isoform_C	-0.40991	0.0599629	0.121719
B7Z0T1	B7Z0T1_DROME	CG31534	CG31534,_isoform_D	-0.90483	3.84015e-06	0.000106591
B7Z0U6	B7Z0U6_DROME	Best1	Bestrophin_1,_isoform_B	0.712766	1.10095e-05	0.000223934
B7Z0U7	B7Z0U7_DROME	lap	Like-AP180,_isoform_C	-0.190383	0.110967	0.195408
B7Z0V1	B7Z0V1_DROME	Taf7	TBP-associated_factor_7,_isoform_B	-0.271071	0.00731231	0.0242649
B7Z0V2	B7Z0V2_DROME	CG2698	CG2698,_isoform_B	-0.737581	8.81986e-05	0.000946816
B7Z0V3	B7Z0V3_DROME	CG2767	CG2767,_isoform_B	-0.951067	2.13988e-05	0.000354618
B7Z0W3	B7Z0W3_DROME	Dmtn	CG1021,_isoform_G	0.104318	0.579232	0.683756
B7Z0X1	B7Z0X1_DROME	CG3011	Serine_hydroxymethyltransferase	0.305736	0.0976324	0.175871
B7Z0X3	B7Z0X3_DROME	rg	Rugose,_isoform_D	0.436206	0.0128438	0.0369362
B7Z0Z0	B7Z0Z0_DROME	Dsp1	Dorsal_switch_protein_1,_isoform_F	-0.561525	0.0350078	0.0805591
B7Z107	B7Z107_DROME	cin-RB	CG42376,_isoform_A	-0.20377	0.338121	0.45837
B7Z134	B7Z134_DROME	CG7766	CG7766,_isoform_D	-0.585069	4.73277e-05	0.000623035
B7Z138	B7Z138_DROME	CG2967	CG34408,_isoform_D	-0.0189247	0.853269	0.904202
B7Z143	B7Z143_DROME	CG11138	CG11138,_isoform_D	-0.891759	0.000109692	0.0011044
B7Z145	B7Z145_DROME	Ten-a	Tenascin_accessory,_isoform_E	-0.430349	0.0119996	0.0350907
B7Z155	B7Z155_DROME	CG4928	CG4928,_isoform_B	0.938189	0.00516879	0.018615
C0MIY4	C0MIY4_DROME	asf1	Anti-silencing_factor_1,_isoform_B	0.568674	0.00605834	0.0210475
C0PDF4	C0PDF4_DROME	CG18815-RA	CG18815,_isoform_D	-0.625514	7.21516e-05	0.000835229
C0PUY1	C0PUY1_DROME	CG11168-RA	AT25426p	-0.33916	0.00515143	0.0185792
C0PVB3	C0PVB3_DROME	Alr	Sulfhydryl_oxidase	0.434795	0.00421415	0.0160029
C4NYP8	F10A1_DROME	HIP	Hsc70-interacting_protein_1	-0.293906	0.017723	0.0468634
C6SV09	C6SV09_DROME	Lint-1	IP16414p	0.536234	0.0134843	0.0381664
C6SV36	C6SV36_DROME	CG3884-RB	CG3884,_isoform_C	1.94272	4.34285e-07	2.1183e-05
C6SV41	C6SV41_DROME	Trp1	AT13927p	-0.292442	0.0415057	0.0917398
C7LAG1	C7LAG1_DROME	CoRest	CoRest,_isoform_G	-0.0880768	0.483721	0.599461
C9QP21	C9QP21_DROME	Est-6	Esterase_6,_isoform_B	0.445549	0.0552653	0.114307
C9QP42	C9QP42_DROME	eIF-4a	Eukaryotic_initiation_factor_4a,_isoform_E	0.00392972	0.970765	0.982039
C9QPE7	C9QPE7_DROME	CG5171-RC	CG5171,_isoform_D	1.10134	0.0229002	0.0576276
D0IQG7	D0IQG7_DROME	Cht2	Chitinase_2,_isoform_B	0.92603	0.00712684	0.0237998
D1YSG0	D1YSG0_DROME	bt	Bent,_isoform_F	0.900857	0.000174468	0.00156803
D1YSG7	D1YSG7_DROME	CaMKII	Calcium/calmodulin-dependent_protein_kinase_II,_isoform_I	0.0799095	0.626043	0.726431
D1Z3A1	D1Z3A1_DROME	RpL28	MIP15344p	-0.311485	0.0175212	0.0465173
D2A6L8	D2A6L8_DROME	fdy	Flagrante_delicto_Y_(Fragment)	-0.731117	0.00218414	0.00982375
D2NUK9	D2NUK9_DROME	hoip	Hoi-polloi,_isoform_B	-0.418855	0.000257247	0.00206455
D3DMJ6	D3DMJ6_DROME	CG12272-RA	CG12272,_isoform_B	-0.0641305	0.399975	0.51875
D3DML3	D3DML3_DROME	Cka	Connector_of_kinase_to_AP-1,_isoform_E	-0.323107	0.00173488	0.0083089
D3DML7	D3DML7_DROME	sky	MIP14691p	0.601952	8.79799e-05	0.000946491
D3DMP8	D3DMP8_DROME	tko	MIP16231p	0.00921703	0.952108	0.971049
D3PFG8	D3PFG8_DROME	LysB	Lysozyme_B,_isoform_B	0.710964	0.264806	0.380607
D3PFH9	D3PFH9_DROME	ssh	AT10562p	-0.365288	0.0974687	0.175639
D5A7R5	D5A7R5_DROME	CG9240	CG9240,_isoform_B	0.320498	0.0498971	0.105863
D5AEK7	D5AEK7_DROME	CG4729	CG4729,_isoform_E	0.162954	0.0522119	0.109662
D5SHN1	D5SHN1_DROME	CG13284-RB	CG13284,_isoform_C	-0.130682	0.578743	0.683338
D5SHT6	D5SHT6_DROME	CG5707-RA	CG5707,_isoform_B	-1.26453	5.30013e-05	0.000664036
D6W4K8	D6W4K8_DROME	CG17323-RA	CG17323,_isoform_B	0.129326	0.573024	0.680179
E0R7R0	E0R7R0_DROME	CG32264-RE	CG32264,_isoform_K	-0.558859	0.00249352	0.0106708
E1JGK5	E1JGK5_DROME	Mapmodulin	Mapmodulin,_isoform_D	-0.189053	0.0910535	0.167627
E1JGK6	E1JGK6_DROME	stau	Staufen,_isoform_C	-0.422847	0.000924888	0.00525044
E1JGK7	E1JGK7_DROME	lolal	Lola_like,_isoform_E	-0.184426	0.135821	0.228521
E1JGN0	E1JGN0_DROME	par-1	Par-1,_isoform_P	-0.012779	0.869381	0.915867
E1JGN9	E1JGN9_DROME	exu	AT02443p	-0.680405	0.0417803	0.0921846
E1JGP0	E1JGP0_DROME	Act57B	Actin_57B,_isoform_C	0.742952	8.42308e-05	0.000919947
E1JGP2	E1JGP2_DROME	RIC-3	CG30296,_isoform_N	0.209556	0.256369	0.371503
E1JGV6	E1JGV6_DROME	Nop60B	Nucleolar_protein_at_60B,_isoform_C	-0.0546565	0.559544	0.668844
E1JGW3	E1JGW3_DROME	ITP	Ion_transport_peptide,_isoform_E	0.698595	0.0120268	0.0351463
E1JGX2	E1JGX2_DROME	Gprk1	G_protein-coupled_receptor_kinase_1,_isoform_B	-0.0615163	0.536947	0.647844
E1JGX3	E1JGX3_DROME	Nipped-B	Nipped-B,_isoform_G	0.0381353	0.737477	0.818803
E1JGY6	E1JGY6_DROME	l(2)01289	Lethal_(2)_01289,_isoform_F	1.33714	0.000152616	0.00141205
E1JGZ1	E1JGZ1_DROME	Eaf	ELL-associated_factor,_isoform_C	-0.0485836	0.700807	0.788278
E1JGZ9	E1JGZ9_DROME	CG30382	Proteasome_subunit_alpha_type	-0.111175	0.505737	0.619713
E1JH01	E1JH01_DROME	CSN4	COP9_complex_homolog_subunit_4,_isoform_B	-0.228987	0.0268478	0.0656687
E1JH02	E1JH02_DROME	lig	Lingerer,_isoform_E	-0.764367	0.00275752	0.0116195
E1JH30	E1JH30_DROME	stan	Starry_night,_isoform_B	-0.20684	0.342363	0.462374
E1JH51	E1JH51_DROME	Su(z)2	Suppressor_2_of_zeste_h29	-0.564005	0.0172137	0.045806
E1JH67	E1JH67_DROME	AttB	Attacin-B,_isoform_B	0.850573	0.0161232	0.0436989
E1JHA4	E1JHA4_DROME	Hrb27C	Heterogeneous_nuclear_ribonucleoprotein_at_27C,_isoform_D	-0.0870618	0.297595	0.415998
E1JHB2	E1JHB2_DROME	cdc14	Cdc14,_isoform_C	-0.140152	0.1734	0.276648
E1JHB4	E1JHB4_DROME	Piezo	Piezo,_isoform_G	0.00251286	0.987727	0.992039
E1JHC8	E1JHC8_DROME	GlcAT-S	FI18306p1	0.00280566	0.983871	0.989782
E1JHD6	E1JHD6_DROME	bsk	Basket,_isoform_E	0.0135611	0.877042	0.921043
E1JHE1	E1JHE1_DROME	Klp31E	Klp31E,_isoform_E	-0.342832	0.00168655	0.00814734
E1JHE4	E1JHE4_DROME	Fatp	Fatty_acid_(Long_chain)_transport_protein,_isoform_D	0.537651	0.00700149	0.0234816
E1JHJ9	E1JHJ9_DROME	CLIP-190	Cytoplasmic_linker_protein_190,_isoform_M	0.339903	0.00329776	0.0133076
E1JHK1	E1JHK1_DROME	Dif	Dorsal-related_immunity_factor,_isoform_D	0.0189414	0.924003	0.951854
E1JHM0	E1JHM0_DROME	CdGAPr	CdGAPr,_isoform_C	-0.754844	0.00291396	0.0120989
E1JHN0	E1JHN0_DROME	CG14397-RA	CG14397	-0.796412	0.00604856	0.0210443
E1JHN2	E1JHN2_DROME	CG9249	CG9249,_isoform_B	0.150459	0.358589	0.4785
E1JHQ1	E1JHQ1_DROME	Gs1	Glutamine_synthetase	-1.36481	3.21698e-05	0.000483237
E1JHT5	E1JHT5_DROME	CG2950	CG2950,_isoform_D	-0.18078	0.102552	0.182529
E1JHT6	E1JHT6_DROME	Rtnl1	Reticulon-like_protein	0.288553	0.0196372	0.0507758
E1JHV6	E1JHV6_DROME	E(bx)	Enhancer_of_bithorax,_isoform_E	-0.397439	0.0161997	0.0438273
E1JHX5	E1JHX5_DROME	CG7611	CG7611,_isoform_B	-0.263497	0.00408519	0.0156552
E1JHY0	E1JHY0_DROME	CG5946	CG5946,_isoform_E	-0.914575	0.000266354	0.00210403
E1JHY7	E1JHY7_DROME	Pop2	Pop2,_isoform_D	-0.163462	0.208875	0.319511
E1JI13	E1JI13_DROME	Dab	Disabled,_isoform_F	-0.057795	0.843461	0.897634
E1JI20	E1JI20_DROME	Nca	Neurocalcin,_isoform_B	-0.484666	0.00095322	0.00537403
E1JI40	E1JI40_DROME	verm	Vermiform,_isoform_E	0.356449	0.143705	0.239065
E1JI46	E1JI46_DROME	Mi-2	Mi-2,_isoform_C	0.0396367	0.78641	0.855396
E1JI58	E1JI58_DROME	Sin	Sex-lethal_interactor,_isoform_C	-0.564001	0.00121837	0.0064632
E1JI71	E1JI71_DROME	CG32352	CG43078,_isoform_E	1.21021	4.4591e-06	0.000119244
E1JI84	E1JI84_DROME	CG5021	CG5021,_isoform_C	-0.339635	0.0456611	0.0986248
E1JI93	E1JI93_DROME	Tequila	Tequila,_isoform_E	-0.36959	0.0545686	0.113039
E1JIB4	E1JIB4_DROME	CG2162	CG2162,_isoform_B	-0.233704	0.294669	0.412516
E1JIC5	E1JIC5_DROME	CG14995	CG14995,_isoform_G	-0.368929	0.0378153	0.0854245
E1JIC9	E1JIC9_DROME	TfIIEbeta	Transcription_factor_IIEbeta,_isoform_B	-0.621857	0.014288	0.0398351
E1JID7	E1JID7_DROME	shep	Alan_shepard,_isoform_E	0.134837	0.127985	0.218557
E1JIE1	E1JIE1_DROME	mp	Multiplexin,_isoform_B	1.08891	6.12411e-07	2.84885e-05
E1JIF5	E1JIF5_DROME	CG9837	CG9837,_isoform_C	-0.20648	0.465418	0.581512
E1JIH2	E1JIH2_DROME	Unc-115a	CG31352,_isoform_C	-0.302984	0.015591	0.042663
E1JIH5	E1JIH5_DROME	MED6	Mediator_of_RNA_polymerase_II_transcription_subunit_6	-0.00132939	0.991372	0.994143
E1JIJ5	E1JIJ5_DROME	Vha55	Vacuolar_H[+]-ATPase_55kD_B_subunit,_isoform_C	0.59815	0.00086088	0.00498279
E1JIJ7	E1JIJ7_DROME	CG7518	CG7518,_isoform_C	-0.375461	0.00621682	0.0214662
E1JIJ8	E1JIJ8_DROME	Ace	Acetylcholine_esterase,_isoform_B	0.0963366	0.606111	0.709318
E1JIK0	E1JIK0_DROME	Hrb87F	Heterogeneous_nuclear_ribonucleoprotein_at_87F,_isoform_C	-0.0649571	0.564658	0.672371
E1JIL4	E1JIL4_DROME	Caf1	Chromatin_assembly_factor_1_subunit,_isoform_B	0.104069	0.424373	0.541938
E1JIL5	E1JIL5_DROME	mRpS10	Mitochondrial_ribosomal_protein_S10,_isoform_D	0.200835	0.123988	0.212817
E1JIM4	E1JIM4_DROME	msps	Mini_spindles,_isoform_B	0.12799	0.366674	0.485933
E1JIN0	E1JIN0_DROME	Pxd	Peroxidase,_isoform_B	0.136908	0.848822	0.90128
E1JIN6	E1JIN6_DROME	osa	Osa,_isoform_D	-0.0385443	0.812481	0.87557
E1JIQ4	E1JIQ4_DROME	CG4662	CG4662,_isoform_C	-0.0305582	0.772134	0.84651
E1JIR1	E1JIR1_DROME	CG4159	tRNA_pseudouridine_synthase	0.0217048	0.828085	0.887247
E1JIS1	E1JIS1_DROME	CG7956	CG7956,_isoform_D	0.417164	0.00207958	0.00949392
E1JIT4	E1JIT4_DROME	CG7048	CG7048,_isoform_B	-0.163233	0.135965	0.228687
E1JIU5	E1JIU5_DROME	Irk2	Inwardly_rectifying_potassium_channel_2,_isoform_C	1.49668	0.00186552	0.00875924
E1JIV8	E1JIV8_DROME	nct	Nicastrin,_isoform_C	0.160439	0.0946581	0.172056
E1JIX8	E1JIX8_DROME	CG4743	CG4743,_isoform_B	-0.230426	0.0759824	0.145868
E1JIZ0	E1JIZ0_DROME	scrib	Scribbled,_isoform_L	0.0695351	0.636468	0.7361
E1JIZ7	E1JIZ7_DROME	CG42487	CG42487	-0.291444	0.0122257	0.035504
E1JJ32	E1JJ32_DROME	cpx	Complexin,_isoform_S	0.0777475	0.802242	0.867699
E1JJ49	E1JJ49_DROME	UbcD6	Ubiquitin_conjugating_enzyme,_isoform_B	-0.240863	0.12246	0.211189
E1JJ50	E1JJ50_DROME	CG12173	CG12173,_isoform_B	0.637726	2.09983e-05	0.000349323
E1JJ51	E1JJ51_DROME	Pi4KIIalpha	Pi4KIIalpha,_isoform_D	0.0663469	0.601395	0.705607
E1JJ55	E1JJ55_DROME	CG2082	CG2082,_isoform_H	1.85722	1.15418e-08	1.34851e-06
E1JJ72	E1JJ72_DROME	Taf1	FI22504p1	-0.358957	0.000656406	0.00410683
E1JJ73	E1JJ73_DROME	CG1307	CG1307,_isoform_C	0.22071	0.0391111	0.0874863
E1JJ89	E1JJ89_DROME	CG18249	CG18249,_isoform_B	-0.470447	0.0072988	0.0242361
E1JJC3	E1JJC3_DROME	sdk	Sidekick,_isoform_B_(Fragment)	-0.168425	0.115136	0.201128
E1JJD5	E1JJD5_DROME	norpA	No_receptor_potential_A,_isoform_E	0.370065	0.0352359	0.0808968
E1JJE0	E1JJE0_DROME	rb	Ruby,_isoform_B	-0.260511	0.0045445	0.0169248
E1JJF3	E1JJF3_DROME	Inx2	Innexin	-0.896248	3.60288e-05	0.000521639
E1JJF4	E1JJF4_DROME	sws	FI19439p1	0.0954197	0.454945	0.571552
E1JJF8	E1JJF8_DROME	Nrg	Neuroglian,_isoform_E	-0.433852	0.00099138	0.00553411
E1JJG4	E1JJG4_DROME	APC4	Anaphase_promoting_complex_4,_isoform_C	0.315316	0.00756773	0.0248661
E1JJI5	E1JJI5_DROME	CkIalpha	Casein_kinase_ialpha,_isoform_D	-0.244982	0.0104363	0.0318384
E1JJJ8	E1JJJ8_DROME	fs(1)h	Female_sterile_(1)_homeotic,_isoform_F	-0.228835	0.0666395	0.132331
E1JJK6	E1JJK6_DROME	rdgB	Retinal_degeneration_B,_isoform_H	0.85525	0.00013422	0.00128687
E1JJL4	E1JJL4_DROME	Fur2	Furin_2,_isoform_I	-0.43844	0.00286539	0.0119566
E1JJM9	E1JJM9_DROME	RpS15Aa	Ribosomal_protein_S15Aa,_isoform_F	-0.217812	0.0977698	0.175993
E1JJN1	E1JJN1_DROME	ben	Bendless,_isoform_B	-0.273177	0.0104311	0.0318384
E1JJN6	E1JJN6_DROME	X11L	X11L,_isoform_B	-0.310527	0.0194712	0.0504459
E1JJP0	E1JJP0_DROME	up	Upheld,_isoform_H	0.928085	0.00377993	0.01479
E1JJP7	E1JJP7_DROME	NetB	Netrin-B,_isoform_B	-0.789862	0.000647453	0.00407109
E1JJQ3	E1JJQ3_DROME	Grip84	Gamma-tubulin_ring_protein_84,_isoform_E	0.175201	0.269282	0.385324
E1JJR3	E1JJR3_DROME	pcm	Pacman,_isoform_B	-0.137693	0.13983	0.234013
E1JJR9	E1JJR9_DROME	CG17065	CG17065,_isoform_B	1.20651	1.20097e-06	4.53661e-05
E1JJS1	E1JJS1_DROME	GstT3	Glutathione_S_transferase_T3,_isoform_B	1.97647	1.05519e-07	6.7965e-06
E1NZB4	E1NZB4_DROME	fne	Found_in_neurons,_isoform_D_(Fragment)	-0.609084	0.101981	0.181814
E1NZC4	E1NZC4_DROME	CG18769-RC	CG18769,_isoform_G	0.300788	0.0263007	0.0646769
E2QC56	E2QC56_DROME	CG10417	CG10417,_isoform_B	-0.0916996	0.414465	0.531966
E2QC61	E2QC61_DROME	bin3	Bicoid-interacting_protein_3,_isoform_B	-0.0196351	0.882581	0.924652
E2QC83	E2QC83_DROME	Pabp2	Pabp2,_isoform_B	-0.166794	0.12173	0.210234
E2QC90	E2QC90_DROME	ced-6	Ced-6,_isoform_B	-0.784136	8.67642e-06	0.00019108
E2QCG7	E2QCG7_DROME	eIF3-S9	Eukaryotic_translation_initiation_factor_3_subunit_B	-0.136493	0.161192	0.260814
E2QCK0	E2QCK0_DROME	Tango11	Transport_and_golgi_organization,_isoform_B	0.241683	0.0371077	0.0840527
E2QCN9	E2QCN9_DROME	Gs1l	GS1-like,_isoform_B	-0.389687	0.00747721	0.024617
E2QCP0	E2QCP0_DROME	His3.3B	Histone_H3	-0.44338	0.00190255	0.00888329
E2QCQ3	E2QCQ3_DROME	milt	FI19826p1	-0.150262	0.142255	0.237044
E2QCS8	E2QCS8_DROME	tho2	Tho2,_isoform_B	0.0525836	0.577823	0.682573
E2QCY2	E2QCY2_DROME	CG3961-RD	CG3961,_isoform_D	-1.16264	2.10391e-08	2.12658e-06
E2QCY4	E2QCY4_DROME	fry	Furry,_isoform_C	-0.0729052	0.452293	0.569313
E2QCZ3	E2QCZ3_DROME	CG7705-RA	CG7705,_isoform_A	-0.228391	0.0587213	0.120072
E2QCZ5	E2QCZ5_DROME	CG7706	CG7706	-0.330163	0.00381568	0.0148604
E2QCZ8	E2QCZ8_DROME	CG31531	CG31531,_isoform_B	-1.18222	7.75698e-06	0.000181261
E2QCZ9	E2QCZ9_DROME	CG1129	CG1129,_isoform_B	0.0893954	0.325043	0.44594
E2QD00	E2QD00_DROME	jagn	Jagunal,_isoform_B	-0.0409663	0.718723	0.803486
E2QD64	E2QD64_DROME	CG2982	CG2982	0.277195	0.00916493	0.0289771
E2QD65	E2QD65_DROME	RpS19a	Ribosomal_protein_S19a,_isoform_C	-0.277151	0.0331749	0.0770909
E2QD73	E2QD73_DROME	dnc	Dunce,_isoform_J	0.209128	0.178923	0.28321
E2QD75	E2QD75_DROME	Cbp80	Cap_binding_protein_80,_isoform_B	0.0357087	0.719531	0.804031
E2QD98	E2QD98_DROME	sdt	Stardust,_isoform_G	-0.109571	0.582203	0.686599
E4NKJ3	E4NKJ3_DROME	wupA	GH04081p	1.11841	0.203138	0.312406
E4NKP2	E4NKP2_DROME	l(1)G0156	LP13001p1	0.285556	0.087608	0.162534
E6EK15	E6EK15_DROME	PMCA	Plasma_membrane_calcium_ATPase,_isoform_P	0.0912684	0.306991	0.426409
E6PBV6	E6PBV6_DROME	CG1354-RA	AT07526p	-0.636786	0.000565746	0.00368652
E8NH13	E8NH13_DROME	dlg1	Discs_large_1,_isoform_P	0.187908	0.0826747	0.155664
E8NH67	E8NH67_DROME	CG9572-RB	CG9572,_isoform_B	1.27411	0.00497253	0.0180898
E8NHA2	E8NHA2_DROME	CG9153-RB	CG9153,_isoform_C	-0.114622	0.23451	0.348883
E8NHB1	E8NHB1_DROME	Taf2	LD23043p	-0.0995068	0.300899	0.419408
F0JAF7	F0JAF7_DROME	Rab35	MIP14774p	0.013755	0.888755	0.929069
F0JAN1	F0JAN1_DROME	ade5	Ade5,_isoform_B	-1.30677	2.60166e-05	0.000414944
F0JAP7	F0JAP7_DROME	CG15347-RB	CG15347,_isoform_B	1.42435	0.0100157	0.0308514
F0JAQ9	F0JAQ9_DROME	Wbp2	MIP27169p	0.0368995	0.725974	0.809071
F2FB81	F2FB81_DROME	SCAR	MIP02973p	-0.162697	0.216087	0.327488
F3YDK4	F3YDK4_DROME	Pur-alpha	Purine-rich_binding_protein-alpha,_isoform_G	0.392309	0.00185147	0.00872589
H0RNK3	H0RNK3_DROME	Sclp	FI16115p1	0.219486	0.339694	0.45956
H5V864	H5V864_DROME	Spn	FI18374p1	-0.709463	0.000179632	0.00159166
H5V895	H5V895_DROME	flw	FI18647p1	0.329391	0.00164352	0.00797011
H9XVL5	H9XVL5_DROME	plexB	Plexin_B,_isoform_B	-0.392323	0.0153097	0.0420306
H9XVM3	H9XVM3_DROME	CG2219	CG2219,_isoform_B	-0.304694	0.00960891	0.0299474
H9XVM5	H9XVM5_DROME	CG31998	CG31998,_isoform_B	-0.818037	3.70186e-05	0.000531375
H9XVM9	H9XVM9_DROME	CG1674	CG1674,_isoform_L	0.673722	0.0700627	0.137284
L0MLQ9	L0MLQ9_DROME	CG32016	CG32016,_isoform_H	-0.558245	0.00658767	0.0224535
L0MN91	L0MN91_DROME	bt	Bent,_isoform_I	-0.332782	0.0497702	0.105727
L0MNA8	L0MNA8_DROME	Arf102F	ADP_ribosylation_factor_102F,_isoform_B	-0.257426	0.0897608	0.165611
L0MPS3	L0MPS3_DROME	Rfabg	Retinoid-and_fatty_acid-binding_glycoprotein,_isoform_B	-1.14913	7.30337e-05	0.000840304
L0MPZ1	L0MPZ1_DROME	bt	Bent,_isoform_H	0.83804	0.077062	0.147658
L0MQ04	L0MQ04_DROME	ATPsyn-beta	ATP_synthase_subunit_beta	-0.03452	0.834962	0.891825
L0MQ08	L0MQ08_DROME	Cals	Calsyntenin-1,_isoform_C	0.228277	0.123676	0.212353
M9MQH9	M9MQH9_DROME	Pp2A-29B	Protein_phosphatase_2A_at_29B,_isoform_C	-0.166329	0.0338803	0.0785123
M9MRC9	M9MRC9_DROME	RpL27A	Ribosomal_protein_L27A,_isoform_C	-0.565832	0.000206715	0.00177225
M9MRD0	M9MRD0_DROME	Uch	Ubiquitin_carboxy-terminal_hydrolase,_isoform_B	0.0582006	0.47077	0.586449
M9MRD4	M9MRD4_DROME	Msp-300	Muscle-specific_protein_300,_isoform_B	0.324455	0.00234377	0.0102303
M9MRD6	M9MRD6_DROME	Msp-300	Muscle-specific_protein_300,_isoform_I	0.179919	0.0816822	0.154275
M9MRF2	M9MRF2_DROME	RpL37A	Ribosomal_protein_L37A,_isoform_C	-0.0757033	0.561548	0.670282
M9MRG1	M9MRG1_DROME	CG18661	CG18661,_isoform_B	0.731285	0.000228009	0.0018997
M9MRG2	M9MRG2_DROME	CG4747	CG4747,_isoform_B	-0.252112	0.0238075	0.0595735
M9MRG5	M9MRG5_DROME	tai	Taiman,_isoform_F	-0.647068	0.00504049	0.0182708
M9MRH0	M9MRH0_DROME	RluA-2	RluA-2,_isoform_C	-0.210365	0.283796	0.401066
M9MRH8	M9MRH8_DROME	Cnot4	Cnot_4_homologue,_isoform_H	-0.233012	0.118855	0.206332
M9MRH9	M9MRH9_DROME	CG42711	CG42711	1.97517	3.41743e-08	3.12167e-06
M9MRI2	M9MRI2_DROME	Sema-1a	Sema-1a,_isoform_F	-0.0293184	0.890467	0.929786
M9MRJ4	M9MRJ4_DROME	Msp-300	Muscle-specific_protein_300,_isoform_G	-0.0748277	0.420265	0.538625
M9MRK7	M9MRK7_DROME	tweek	Tweek,_isoform_H	-0.270825	0.0308228	0.0729411
M9MRL9	M9MRL9_DROME	SmB	Small_nuclear_ribonucleoprotein-associated_protein	0.146365	0.430661	0.548293
M9MRM3	M9MRM3_DROME	Lip4	Lipase	-0.428238	0.0363762	0.0828066
M9MRM4	M9MRM4_DROME	Sac1	Sac1,_isoform_B	0.182625	0.0351704	0.0808414
M9MRN5	M9MRN5_DROME	CG33231	CG42669,_isoform_G	0.123739	0.375166	0.495097
M9MRP5	M9MRP5_DROME	Eip63F-1	Ecdysone-induced_protein_63F_1,_isoform_C	0.409707	0.0820925	0.154933
M9MRQ9	M9MRQ9_DROME	Scsalpha	Succinyl_coenzyme_A_synthetase_alpha_subunit,_isoform_B	-0.275428	0.0711965	0.138801
M9MRS6	M9MRS6_DROME	CG18490	CG42671,_isoform_D	-0.60519	0.0435615	0.0949471
M9MRS7	M9MRS7_DROME	Myo31DF	Myosin_31DF,_isoform_C	0.62641	0.000776256	0.00461245
M9MRT2	M9MRT2_DROME	Hsp67Bb	Heat_shock_gene_67Bb,_isoform_C	3.01545	3.87817e-08	3.24732e-06
M9MRT6	M9MRT6_DROME	R	Roughened,_isoform_B	-0.407063	0.00220686	0.00984659
M9MRV7	M9MRV7_DROME	CG1332	CG43367,_isoform_C	0.538138	2.8621e-05	0.000437057
M9MRX4	M9MRX4_DROME	Ank2	Ankyrin_2,_isoform_U	-0.232008	0.394874	0.513817
M9MRX8	M9MRX8_DROME	Fdxh	Ferredoxin,_isoform_B	0.286508	0.092668	0.16979
M9MRY3	M9MRY3_DROME	Pka-R1	cAMP-dependent_protein_kinase_R1,_isoform_AA	0.810271	0.000103007	0.00105829
M9MRY7	M9MRY7_DROME	CG12024	CG12024,_isoform_C	-0.598885	0.00145576	0.00730322
M9MS06	M9MS06_DROME	Actn	Alpha_actinin,_isoform_D	1.05672	0.000181269	0.00160333
M9MS14	M9MS14_DROME	moody	Moody,_isoform_C	-0.383538	0.0326055	0.0760846
M9MS15	M9MS15_DROME	Nrt	Neurotactin,_isoform_C	-0.170573	0.510348	0.624145
M9MS41	M9MS41_DROME	Hr78	Hormone-receptor-like_in_78,_isoform_E	-0.203063	0.190183	0.29664
M9MS42	M9MS42_DROME	l(1)G0232	Lethal_(1)_G0232,_isoform_G	0.0128314	0.892808	0.930583
M9MS48	M9MS48_DROME	Rbp1-like	Rbp1-like,_isoform_B	-0.0606407	0.50123	0.615402
M9MS55	M9MS55_DROME	AMPdeam	CG32626,_isoform_H	-0.84177	0.000101182	0.00104461
M9MS57	M9MS57_DROME	Ranbp16	Ranbp16,_isoform_E	-0.104409	0.261862	0.377285
M9MS70	M9MS70_DROME	CG15786	CG42749,_isoform_C	-1.07152	0.00112538	0.00608979
M9MSF0	M9MSF0_DROME	CG6762	Sulfiredoxin	-0.13371	0.544262	0.654783
M9MSF6	M9MSF6_DROME	CG42854	CG42854	1.18546	0.00103171	0.00570541
M9MSI4	M9MSI4_DROME	CG18095	CG18095,_isoform_B	0.671954	0.128497	0.219091
M9MSJ7	M9MSJ7_DROME	CG13923	CG42676,_isoform_C	-0.451435	0.00957706	0.0298857
M9MSK3	M9MSK3_DROME	Src64B	Src_oncogene_at_64B,_isoform_G	0.76387	5.15154e-06	0.000133265
M9MSK4	M9MSK4_DROME	Sh3beta	Sh3beta,_isoform_D	-0.00581086	0.970823	0.982039
M9MSL3	M9MSL3_DROME	Hsc70Cb	Hsc70Cb,_isoform_G	0.070174	0.432087	0.549103
M9MSM4	M9MSM4_DROME	Nopp140	Nopp140,_isoform_F	0.219831	0.172469	0.275512
M9MSM5	M9MSM5_DROME	DAAM	Dishevelled_associated_activator_of_morphogenesis,_isoform_D	0.751628	0.0025057	0.0107137
M9MSQ1	M9MSQ1_DROME	CG5004	CG5004,_isoform_B	-0.276334	0.0887605	0.164248
M9NCP5	M9NCP5_DROME	CG5001	CG5001,_isoform_C	0.601762	0.000169548	0.00153203
M9NCR7	M9NCR7_DROME	Oscillin	Oscillin,_isoform_E	0.0586733	0.74348	0.823466
M9NCS7	M9NCS7_DROME	CG8086	CG8086,_isoform_G	-0.619719	0.0186108	0.0486983
M9NCS8	M9NCS8_DROME	Glt	Glutactin,_isoform_D	0.400329	0.0108924	0.0328273
M9NCV1	M9NCV1_DROME	fws	Four_way_stop,_isoform_D	-0.0486561	0.535905	0.646741
M9NCX1	M9NCX1_DROME	l(2)gl	Lethal_(2)_giant_larvae,_isoform_G	0.114431	0.234961	0.349244
M9NCZ5	M9NCZ5_DROME	dia	Diaphanous,_isoform_D	-0.156334	0.085268	0.159311
M9ND00	M9ND00_DROME	Dap160	Dynamin_associated_protein_160,_isoform_D	0.134797	0.333857	0.454306
M9ND06	M9ND06_DROME	CG18317	CG18317,_isoform_C	-0.306705	0.0175273	0.0465173
M9ND16	M9ND16_DROME	Chd1	Chromodomain-helicase-DNA-binding_protein_1,_isoform_B	-0.213208	0.0539012	0.112132
M9ND17	M9ND17_DROME	mthl10	Methuselah-like_10,_isoform_C	0.410009	0.0198492	0.0512448
M9ND19	M9ND19_DROME	Gale	UDP-galactose_4'-epimerase,_isoform_B	0.301074	0.133868	0.225614
M9ND26	M9ND26_DROME	CG16758	CG16758,_isoform_G	0.815652	0.0230475	0.0579243
M9ND86	M9ND86_DROME	spel1	Spellchecker1,_isoform_D	0.240463	0.384704	0.504503
M9ND93	M9ND93_DROME	cp309	Cp309,_isoform_P	0.131852	0.339088	0.459303
M9ND95	M9ND95_DROME	Mhc	Myosin_heavy_chain,_isoform_U	1.24495	0.00484414	0.0177642
M9NDA6	M9NDA6_DROME	Lasp	Lasp,_isoform_C	-0.431462	0.0320239	0.0750411
M9NDC3	M9NDC3_DROME	Fs(2)Ket	Female_sterile_(2)_ketel,_isoform_B	-0.122031	0.1485	0.244885
M9NDC7	M9NDC7_DROME	Cdlc2	Cytoplasmic_dynein_light_chain_2,_isoform_C	-0.441634	0.0114716	0.0340019
M9NDD2	M9NDD2_DROME	Ac76E	Adenylyl_cyclase_76E,_isoform_B	1.03206	1.52698e-05	0.000284187
M9NDE0	M9NDE0_DROME	fbl	Fumble,_isoform_G	0.0348205	0.796272	0.863473
M9NDE3	M9NDE3_DROME	CG3921	CG3921,_isoform_B	0.136937	0.485987	0.601527
M9NDG5	M9NDG5_DROME	CG12009	CG12009,_isoform_B	-0.516151	0.145631	0.241708
M9NDG8	M9NDG8_DROME	CG11236	CG11236,_isoform_B	1.45647	2.64575e-05	0.000417995
M9NDH8	M9NDH8_DROME	mRpS6	Mitochondrial_ribosomal_protein_S6,_isoform_B	0.261202	0.0516246	0.108793
M9NDI3	M9NDI3_DROME	Snx6	Snx6,_isoform_B	0.15835	0.182276	0.287421
M9NDL7	M9NDL7_DROME	Reps	Reps,_isoform_B	-0.0153073	0.849777	0.901834
M9NDM4	M9NDM4_DROME	wds	Will_die_slowly,_isoform_B	-0.139216	0.307204	0.42647
M9NDP0	M9NDP0_DROME	CG9932	CG9932,_isoform_C	-0.274594	0.143952	0.239199
M9NDP1	M9NDP1_DROME	ctp	Cut_up,_isoform_E	-0.252806	0.150521	0.247291
M9NDR2	M9NDR2_DROME	BicD	Bicaudal_D,_isoform_B	0.439669	0.00230987	0.0101537
M9NDR9	M9NDR9_DROME	CG7427	Defective_in_cullin_neddylation_protein	-0.295802	0.111172	0.195701
M9NDU6	M9NDU6_DROME	CkIIbeta	Casein_kinase_II_beta_subunit,_isoform_I	0.00496928	0.956241	0.973881
M9NDU8	M9NDU8_DROME	CG32174	Ubiquinone_biosynthesis_protein_COQ4_homolog,_mitochondrial	0.447164	0.000556825	0.00364256
M9NDV5	M9NDV5_DROME	CG17715	CG17715,_isoform_G	0.165732	0.187685	0.293748
M9NDW0	M9NDW0_DROME	Tango2	Transport_and_golgi_organization_2,_isoform_B	0.310893	0.184208	0.289286
M9NDW1	M9NDW1_DROME	DIP2	DISCO_interacting_protein_2,_isoform_B	-0.195878	0.0619912	0.124977
M9NDW6	M9NDW6_DROME	CG17233	CG17233,_isoform_F	-0.967234	0.0134238	0.0380593
M9NDX3	M9NDX3_DROME	Top1	Topoisomerase_1,_isoform_D	0.087241	0.343966	0.46379
M9NDZ4	M9NDZ4_DROME	U2af50	U2_small_nuclear_riboprotein_auxiliary_factor_50,_isoform_D	0.0165257	0.861537	0.910659
M9NE01	M9NE01_DROME	Pp2B-14D	Protein_phosphatase_2B_at_14D,_isoform_B	0.0188532	0.808237	0.872305
M9NE05	M9NE05_DROME	nrm	Neuromusculin,_isoform_E	1.06225	4.21117e-05	0.000581809
M9NE07	M9NE07_DROME	CG9132	CG9132,_isoform_C	-0.325001	0.00161886	0.00786571
M9NE19	M9NE19_DROME	ewg	Erect_wing,_isoform_J	-0.790322	2.32031e-05	0.00037604
M9NE25	M9NE25_DROME	Hmt4-20	Histone_methyltransferase_4-20,_isoform_B	0.0932506	0.408116	0.526548
M9NE66	M9NE66_DROME	nwk	Nervous_wreck,_isoform_B	-0.498077	0.154749	0.252833
M9NE68	M9NE68_DROME	Hsp23	Heat_shock_protein_23,_isoform_B	-0.292992	0.313977	0.433833
M9NE73	M9NE73_DROME	CalpB	Calpain-B,_isoform_B	0.035309	0.726501	0.809303
M9NE89	M9NE89_DROME	Lam	Lamin,_isoform_B	0.489112	0.045018	0.0974872
M9NE98	M9NE98_DROME	CG5114	CG5114,_isoform_B	-0.541185	0.000958168	0.0053846
M9NEA1	M9NEA1_DROME	stai	Stathmin,_isoform_D	-0.544425	0.0936821	0.171024
M9NED8	M9NED8_DROME	rudhira	CG43154,_isoform_D	-0.271578	0.210826	0.321453
M9NEE8	M9NEE8_DROME	Rab8	Rab8,_isoform_B	-0.320632	0.00324455	0.0131396
M9NEL1	M9NEL1_DROME	CanA-14F	Calcineurin_A_at_14F,_isoform_C	0.42128	0.0257732	0.0636601
M9NEN6	M9NEN6_DROME	CG3638	Protein_tweety_homolog	-0.370881	0.00825168	0.0266258
M9NEP1	M9NEP1_DROME	Mhc	Myosin_heavy_chain,_isoform_T	0.640532	0.00756006	0.0248572
M9NEQ1	M9NEQ1_DROME	CG9664	CG9664,_isoform_D	-0.663203	0.00135402	0.00694145
M9NEQ5	M9NEQ5_DROME	CG5110	CG5110,_isoform_B	-0.307834	0.00356122	0.0140879
M9NEQ7	M9NEQ7_DROME	Adar	Adenosine_deaminase_acting_on_RNA,_isoform_E	-0.136028	0.349784	0.469368
M9NEQ9	M9NEQ9_DROME	RpS10b	Ribosomal_protein_S10b,_isoform_D	-0.448291	0.0047312	0.0174391
M9NER9	M9NER9_DROME	CG3191	CG3191,_isoform_B	0.0108179	0.938511	0.962065
M9NES6	M9NES6_DROME	trol	Terribly_reduced_optic_lobes,_isoform_AB	0.0474396	0.755002	0.83295
M9NEU5	M9NEU5_DROME	chic	Profilin	0.137966	0.182618	0.287699
M9NEV0	M9NEV0_DROME	lid	Little_imaginal_discs,_isoform_C	-0.200948	0.126629	0.216609
M9NEW0	M9NEW0_DROME	CG43346-RA	CG43346,_isoform_A	-0.323738	0.0226115	0.0571142
M9NEW1	M9NEW1_DROME	Mlc-c	Myosin_light_chain_cytoplasmic,_isoform_B	0.4391	0.0346324	0.0798867
M9NEW2	M9NEW2_DROME	chm	Chameau,_isoform_B	-0.166721	0.313474	0.433506
M9NEX3	M9NEX3_DROME	CG3566	CG3566,_isoform_D	-0.00378885	0.982469	0.988767
M9NEZ0	M9NEZ0_DROME	l(2)gd1	Lethal_(2)_giant_discs_1,_isoform_B	-0.338532	0.000663112	0.00413335
M9NF02	M9NF02_DROME	Pde1c	Pde1c,_isoform_H	-0.403238	0.0208774	0.0535004
M9NF13	M9NF13_DROME	CG32245	CG42540,_isoform_G	-1.01341	0.0010943	0.00596286
M9NF15	M9NF15_DROME	axo	Axotactin,_isoform_D	-0.0378079	0.829988	0.888906
M9NF18	M9NF18_DROME	CG2247	CG2247,_isoform_D	-0.275873	0.0277005	0.0670041
M9NF32	M9NF32_DROME	CG3793	CG3793,_isoform_B	0.569658	0.00128086	0.0066823
M9NF33	M9NF33_DROME	CG7185	CG7185,_isoform_B	0.0175422	0.845912	0.899632
M9NF51	M9NF51_DROME	rut	Rutabaga,_isoform_B	0.718962	0.0104584	0.0318384
M9NFA7	M9NFA7_DROME	CG9086	CG9086,_isoform_B	-0.465934	7.43901e-05	0.000847474
M9NFF8	M9NFF8_DROME	Cdc42	Cdc42,_isoform_C	0.17677	0.0730055	0.141232
M9NFH8	M9NFH8_DROME	CG9674	CG9674,_isoform_F	0.238777	0.0164117	0.0442816
M9NFL0	M9NFL0_DROME	ash1	Absent,_small,_or_homeotic_discs_1,_isoform_C	-0.166368	0.387879	0.507474
M9NFM7	M9NFM7_DROME	DOR	DOR,_isoform_G	-1.31924	0.00129725	0.006732
M9NFP7	M9NFP7_DROME	elav	Embryonic_lethal_abnormal_vision,_isoform_D	-0.450314	0.159462	0.258849
M9NFR5	M9NFR5_DROME	yps	Ypsilon_schachtel,_isoform_B	-0.0980046	0.488949	0.6043
M9NFW6	M9NFW6_DROME	CanB	Calcineurin_B,_isoform_B	0.311904	0.029704	0.07076
M9NFZ9	M9NFZ9_DROME	CG45057	CG4893,_isoform_B	-0.820379	0.000268827	0.0021169
M9NG39	M9NG39_DROME	Pep	Protein_on_ecdysone_puffs,_isoform_D	0.0302666	0.785447	0.854871
M9NG50	M9NG50_DROME	Moe	Moesin,_isoform_L	0.358737	0.00429448	0.0162222
M9NGB9	M9NGB9_DROME	mub	Mushroom-body_expressed,_isoform_H	0.186174	0.470461	0.586209
M9NGF7	M9NGF7_DROME	HDAC6	HDAC6,_isoform_E	-0.479114	0.00246948	0.010604
M9NGG5	M9NGG5_DROME	futsch	Futsch,_isoform_F	-0.471666	0.136717	0.229644
M9NGY4	M9NGY4_DROME	ZAP3	ZAP3,_isoform_E	-1.4251	2.48313e-05	0.0003973
M9NH07	M9NH07_DROME	up	Upheld,_isoform_N	1.34759	0.00858292	0.0274828
M9NHD5	M9NHD5_DROME	CG14231	CG14231,_isoform_B	0.630555	0.000223935	0.00187508
M9PAY6	M9PAY6_DROME	CG17078	CG17078,_isoform_D	0.126861	0.329224	0.449743
M9PAZ4	M9PAZ4_DROME	IA-2	IA-2_ortholog,_isoform_E	-0.558049	0.128112	0.218626
M9PB12	M9PB12_DROME	CG9886	CG9886,_isoform_B	-0.100216	0.620518	0.722141
M9PB19	M9PB19_DROME	CG3558	CG3558,_isoform_D	-0.04861	0.651059	0.747126
M9PB21	M9PB21_DROME	v(2)k05816	V(2)k05816,_isoform_B	0.303695	0.237603	0.35161
M9PB30	M9PB30_DROME	dp	Dumpy,_isoform_Q	-0.0904167	0.706193	0.793008
M9PB35	M9PB35_DROME	Cf2	Chorion_factor_2,_isoform_F	-0.480256	0.000482874	0.0032837
M9PB50	M9PB50_DROME	retm	Real-time,_isoform_B	-0.146836	0.417836	0.535649
M9PB52	M9PB52_DROME	Galt	Galactose-1-phosphate_uridylyltransferase	0.656779	0.00670181	0.0227346
M9PB54	M9PB54_DROME	homer	Homer,_isoform_F	0.0986046	0.411492	0.529898
M9PB59	M9PB59_DROME	Ndae1	Na[+]-driven_anion_exchanger_1,_isoform_D	0.63662	0.0275175	0.0666255
M9PB60	M9PB60_DROME	Ndae1	Na[+]-driven_anion_exchanger_1,_isoform_I	0.621385	0.00663028	0.0225556
M9PB68	M9PB68_DROME	poe	Purity_of_essence,_isoform_B	-0.161222	0.0746749	0.143888
M9PB84	M9PB84_DROME	RpS2	Ribosomal_protein_S2,_isoform_B	-0.37285	0.0121408	0.0353523
M9PB90	M9PB90_DROME	Cand1	Cullin-associated_and_neddylation-dissociated_1,_isoform_B	-0.0612835	0.413227	0.531013
M9PB96	M9PB96_DROME	CG6724	Ribosome_biogenesis_protein_WDR12_homolog	0.0346968	0.735699	0.817552
M9PBA6	M9PBA6_DROME	CG5446	CG5446,_isoform_B	-0.477956	0.0851288	0.159215
M9PBB3	M9PBB3_DROME	CG18507	CG18507,_isoform_D	0.322931	0.22894	0.343239
M9PBB5	M9PBB5_DROME	vas	Vasa,_isoform_C	0.602032	0.00480538	0.0176737
M9PBD6	M9PBD6_DROME	l(2)37Cg	Lethal_(2)_37Cg,_isoform_D	-0.30131	0.0273025	0.0663929
M9PBE1	M9PBE1_DROME	CG10188	CG10188,_isoform_C	-0.30792	0.0590083	0.120462
M9PBH7	M9PBH7_DROME	Rac1	Rac1,_isoform_B	0.146317	0.312753	0.432976
M9PBH8	M9PBH8_DROME	CG2199	CG2199,_isoform_C	-0.102597	0.282923	0.400165
M9PBH9	M9PBH9_DROME	CG12084	CG12084,_isoform_B	-0.106676	0.297388	0.415831
M9PBI3	M9PBI3_DROME	drpr	Draper,_isoform_F	-0.735203	0.000420198	0.00293205
M9PBI5	M9PBI5_DROME	alpha-Spec	Alpha_spectrin,_isoform_C	-0.0193452	0.86321	0.912236
M9PBJ1	M9PBJ1_DROME	zormin	Zormin,_isoform_J	0.551544	0.0016179	0.00786571
M9PBK1	M9PBK1_DROME	pgant6	FI21231p1	0.178258	0.399556	0.5187
M9PBK5	M9PBK5_DROME	RpLP1	Ribosomal_protein_LP1,_isoform_B	-0.457105	0.0047066	0.017389
M9PBK6	M9PBK6_DROME	prominin-like	Prominin-like,_isoform_F	0.518573	0.000321674	0.00241418
M9PBL3	M9PBL3_DROME	Hsp83	Heat_shock_protein_83,_isoform_B	-0.249647	0.0214229	0.0545785
M9PBM0	M9PBM0_DROME	kraken	Kraken,_isoform_B	0.0481715	0.793458	0.861359
M9PBM1	M9PBM1_DROME	U2af38	U2_small_nuclear_riboprotein_auxiliary_factor_38,_isoform_B	-0.16267	0.108212	0.191092
M9PBM3	M9PBM3_DROME	Atg4	Autophagy-specific_gene_4,_isoform_B	-0.55801	1.73755e-05	0.000302056
M9PBM4	M9PBM4_DROME	CG14977	CG14977,_isoform_B	-0.265603	0.183036	0.288267
M9PBN2	M9PBN2_DROME	NLaz	Neural_lazarillo,_isoform_B	0.246325	0.376816	0.496293
M9PBN7	M9PBN7_DROME	cpb	Capping_protein_beta,_isoform_B	0.442424	0.00321504	0.0130471
M9PBP5	M9PBP5_DROME	Der-1	Derlin-1,_isoform_B	-0.562683	0.000231756	0.00192772
M9PBQ0	M9PBQ0_DROME	Dhc64C	Dynein_heavy_chain_64C,_isoform_D	-0.0509476	0.501239	0.615402
M9PBQ4	M9PBQ4_DROME	AIF	Apoptosis_inducing_factor,_isoform_C	0.230854	0.0479408	0.102274
M9PBR6	M9PBR6_DROME	CG33523	CG33523,_isoform_F	0.43044	0.0434946	0.0948423
M9PBS9	M9PBS9_DROME	CG10103	CG10103,_isoform_F	0.10055	0.289986	0.407407
M9PBU2	M9PBU2_DROME	Rac2	Rac2,_isoform_B	0.338108	0.0611437	0.123517
M9PBU4	M9PBU4_DROME	CG3077	CG3077,_isoform_B	0.143044	0.217438	0.328959
M9PBV1	M9PBV1_DROME	Hn	Henna,_isoform_C	-0.428611	0.0712805	0.138857
M9PBV2	M9PBV2_DROME	NTPase	NTPase,_isoform_F	1.37461	4.27511e-07	2.1057e-05
M9PBV5	M9PBV5_DROME	syd	Sunday_driver,_isoform_I	-0.186472	0.102549	0.182529
M9PBV6	M9PBV6_DROME	CG7927	CG7927,_isoform_B	-0.572514	0.00090236	0.00513998
M9PBV8	M9PBV8_DROME	Eogt	EGF-domain_O-GlcNAc_transferase,_isoform_B	0.196878	0.123446	0.212104
M9PBW0	M9PBW0_DROME	Ubc12	Ubiquitin_conjugating_enzyme_12,_isoform_B	-0.0846502	0.402385	0.520913
M9PBX3	M9PBX3_DROME	CG31689	CG31689,_isoform_H	0.0732277	0.662478	0.756723
M9PBZ9	M9PBZ9_DROME	eIF-4E	Eukaryotic_initiation_factor_4E,_isoform_H	-0.111836	0.270914	0.386924
M9PC05	M9PC05_DROME	Plc21C	Phospholipase_C_at_21C,_isoform_G	0.563707	0.00464291	0.0172148
M9PC18	M9PC18_DROME	CG3326-RA	CG3326,_isoform_B	-0.163112	0.149593	0.24625
M9PC25	M9PC25_DROME	Saf6	SAGA_factor-like_TAF6,_isoform_B	-0.122529	0.325582	0.446309
M9PC64	M9PC64_DROME	fd68A	Forkhead_domain_68A,_isoform_P	-1.05009	0.00453817	0.0169138
M9PC65	M9PC65_DROME	CG34126	CG34126,_isoform_D	-0.0747072	0.491486	0.606689
M9PC68	M9PC68_DROME	CG6175	CG6175,_isoform_D	0.577182	0.00119388	0.00635384
M9PC73	M9PC73_DROME	Liprin-alpha	Liprin-alpha,_isoform_C	-0.150715	0.33834	0.458543
M9PC74	M9PC74_DROME	CG31650	CG31650,_isoform_G	0.183333	0.240267	0.354539
M9PC85	M9PC85_DROME	x16	X16,_isoform_B	0.137888	0.558543	0.668124
M9PC89	M9PC89_DROME	snRNP-U1-70K	Small_ribonucleoprotein_particle_U1_subunit_70K,_isoform_B	0.0117632	0.923464	0.951494
M9PC96	M9PC96_DROME	RhoGAP68F	RhoGAP68F,_isoform_D	-0.277825	0.0956534	0.17327
M9PC99	M9PC99_DROME	gho	Ghost,_isoform_C	-0.543927	0.000500069	0.0033619
M9PCA6	M9PCA6_DROME	Gal	Beta_galactosidase,_isoform_B	1.69566	2.60079e-06	8.06566e-05
M9PCA7	M9PCA7_DROME	Ncc69	Sodium_chloride_cotransporter_69,_isoform_C	0.724769	0.0030063	0.0124004
M9PCB7	M9PCB7_DROME	tral	Trailer_hitch,_isoform_G	-0.867805	0.00087442	0.00502641
M9PCC1	M9PCC1_DROME	Rack1	Receptor_of_activated_protein_kinase_C_1,_isoform_C	-0.229464	0.115879	0.202214
M9PCC3	M9PCC3_DROME	MED20	Mediator_complex_subunit_20,_isoform_B	-0.243924	0.019095	0.0497411
M9PCC4	M9PCC4_DROME	Sap130	Sin3A-associated_protein_130,_isoform_G	-0.522664	0.00251407	0.0107313
M9PCC5	M9PCC5_DROME	Cyp309a1	Cyp309a1,_isoform_C	1.91959	6.81255e-06	0.000163762
M9PCC6	M9PCC6_DROME	CG11329	CG11329,_isoform_B	1.31677	1.99807e-06	6.56099e-05
M9PCE0	M9PCE0_DROME	Pgk	Phosphoglycerate_kinase	-0.901543	6.49773e-05	0.00077174
M9PCE5	M9PCE5_DROME	Hml	Hemolectin,_isoform_B	0.18833	0.570318	0.677691
M9PCE7	M9PCE7_DROME	CG13784	CG13784,_isoform_E	-0.987378	0.000855847	0.00495937
M9PCE8	M9PCE8_DROME	Acer	Angiotensin-converting_enzyme-related,_isoform_B	-0.395456	0.0449755	0.0974373
M9PCF6	M9PCF6_DROME	lilli	Lilliputian,_isoform_H	-0.396739	0.00116287	0.00624175
M9PCF8	M9PCF8_DROME	CG32138	CG32138,_isoform_D	1.09354	1.60545e-05	0.000290135
M9PCH8	M9PCH8_DROME	baf	Barrier_to_autointegration_factor,_isoform_B	-0.0933157	0.664707	0.758629
M9PCI2	M9PCI2_DROME	NHP2	NHP2,_isoform_B	-0.344427	0.00124162	0.006525
M9PCI5	M9PCI5_DROME	CG8475	CG8475,_isoform_C	-0.609192	6.37953e-05	0.000759496
M9PCI6	M9PCI6_DROME	ed	Echinoid,_isoform_C	-0.336848	0.287641	0.405247
M9PCK6	M9PCK6_DROME	Sps2	Selenophosphate_synthetase_2,_isoform_C	-0.347003	0.0191639	0.0498341
M9PCK7	M9PCK7_DROME	CG13090	Adenylyltransferase_and_sulfurtransferase_MOCS3	0.191132	0.0519555	0.109307
M9PCL4	M9PCL4_DROME	CG3887	CG3887,_isoform_B	0.0838543	0.443567	0.560201
M9PCL5	M9PCL5_DROME	mRpS7	Mitochondrial_ribosomal_protein_S7,_isoform_B	0.150278	0.329792	0.45036
M9PCL6	M9PCL6_DROME	Eip71CD	Ecdysone-induced_protein_28/29kD,_isoform_G	0.639689	0.000161828	0.00148362
M9PCM4	M9PCM4_DROME	TfIIB	Transcription_factor_IIB,_isoform_B	-0.214143	0.0614454	0.124026
M9PCN6	M9PCN6_DROME	numb	Numb,_isoform_D	0.00579474	0.979401	0.986971
M9PCP3	M9PCP3_DROME	CG9044	CG9044,_isoform_C	-0.631792	1.45522e-05	0.000275888
M9PCQ1	M9PCQ1_DROME	Cpr	NADPH--cytochrome_P450_reductase	0.362017	0.0386906	0.0869326
M9PCQ8	M9PCQ8_DROME	chico	Chico,_isoform_B	-0.451571	0.00192293	0.00897012
M9PCV1	M9PCV1_DROME	Edem2	Edem2,_isoform_B	-0.33232	0.0165546	0.0445195
M9PCW5	M9PCW5_DROME	Bsg	Basigin,_isoform_J	-0.278516	0.00436054	0.0163854
M9PCW9	M9PCW9_DROME	CG32196	CG32196,_isoform_C	0.115817	0.335601	0.455692
M9PCY7	M9PCY7_DROME	Gbs-76A	Glycogen_binding_subunit_76A,_isoform_B	-0.75626	9.654e-05	0.00101468
M9PD03	M9PD03_DROME	CG9586	CG9586,_isoform_C	-0.554908	0.118942	0.206381
M9PD06	M9PD06_DROME	CG8334	Ubiquitin_carboxyl-terminal_hydrolase	0.265812	0.00830664	0.026786
M9PD08	M9PD08_DROME	Elf	Ef1alpha-like_factor,_isoform_C	-0.225921	0.0889652	0.164505
M9PD09	M9PD09_DROME	CG7770	CG7770,_isoform_B	-0.494311	0.0132933	0.0378516
M9PD14	M9PD14_DROME	fln	Flightin,_isoform_B	1.1542	0.154582	0.252711
M9PD17	M9PD17_DROME	gig	Gigas,_isoform_B	-0.0432333	0.614816	0.7175
M9PD18	M9PD18_DROME	Vha68-1	Vacuolar_H[+]_ATPase_subunit_68-1,_isoform_B	-0.544925	0.00131704	0.00679342
M9PD22	M9PD22_DROME	Cyt-c-d	Cytochrome_c_distal,_isoform_B	-0.331837	0.234228	0.34867
M9PD23	M9PD23_DROME	DnaJ-H	DnaJ_homolog,_isoform_C	0.0525604	0.669721	0.76262
M9PD26	M9PD26_DROME	Cyt-b5-r	Cytochrome_b5-related,_isoform_B	-0.777662	0.0219159	0.0556932
M9PD27	M9PD27_DROME	eRF1	Eukaryotic_release_factor_1,_isoform_H	0.0560347	0.651475	0.747434
M9PD43	M9PD43_DROME	CG16865	CG16865,_isoform_B	-0.446005	0.0282094	0.067908
M9PD57	M9PD57_DROME	stc	Shuttle_craft,_isoform_D	0.0113231	0.934144	0.959546
M9PD65	M9PD65_DROME	RanGAP	Ran_GTPase_activating_protein,_isoform_C	0.421865	0.000140737	0.00131914
M9PD73	M9PD73_DROME	Tep4	Thioester-containing_protein_4,_isoform_B	0.0459769	0.764472	0.84097
M9PD75	M9PD75_DROME	porin	Porin,_isoform_D	0.366677	0.0157641	0.0430663
M9PD88	M9PD88_DROME	Atox1	Atox1,_isoform_B	0.451555	0.00243096	0.0105014
M9PD90	M9PD90_DROME	CG6509	CG6509,_isoform_D	0.172861	0.129934	0.220836
M9PD95	M9PD95_DROME	cact	Cactus,_isoform_E	0.0678068	0.573236	0.680179
M9PDA6	M9PDA6_DROME	CG2614	CG2614,_isoform_C	0.0358871	0.76764	0.843169
M9PDB2	M9PDB2_DROME	vari	Varicose,_isoform_E	-0.406072	0.0929768	0.170169
M9PDC4	M9PDC4_DROME	MESR3	Misexpression_suppressor_of_ras_3,_isoform_B	0.282943	0.238593	0.352763
M9PDF2	M9PDF2_DROME	swm	Second_mitotic_wave_missing,_isoform_C	-0.703109	0.0014107	0.00713731
M9PDF5	M9PDF5_DROME	adat	Adat,_isoform_B	-0.661738	0.000132638	0.00127758
M9PDG9	M9PDG9_DROME	CG12773	CG12773,_isoform_B	0.37271	0.0107515	0.0324738
M9PDI0	M9PDI0_DROME	miple2	Miple2,_isoform_D	0.222389	0.542107	0.652659
M9PDM4	M9PDM4_DROME	PI4KIIIalpha	Phosphatidylinositol_4-kinase_III_alpha,_isoform_D	0.354947	0.00183578	0.00866004
M9PDM5	M9PDM5_DROME	cta	Concertina,_isoform_B	-0.0178789	0.883578	0.925195
M9PDP3	M9PDP3_DROME	fon	Fondue,_isoform_D	-1.71694	1.27175e-06	4.698e-05
M9PDQ1	M9PDQ1_DROME	Top2	DNA_topoisomerase_2	0.132554	0.475602	0.591149
M9PDQ9	M9PDQ9_DROME	CG31974	CG31974,_isoform_D	0.435951	0.152398	0.249804
M9PDR9	M9PDR9_DROME	Fas2	Fasciclin_2,_isoform_E	0.200774	0.0953635	0.172978
M9PDU4	M9PDU4_DROME	mtacp1	Acyl_carrier_protein	-0.678631	0.00159406	0.00779799
M9PDV3	M9PDV3_DROME	CG12090	CG12090,_isoform_E	0.0436456	0.587362	0.691889
M9PDW0	M9PDW0_DROME	n-syb	N-synaptobrevin,_isoform_K	-0.0980491	0.761166	0.838301
M9PDW8	M9PDW8_DROME	CG34417	CG34417,_isoform_T	0.00177538	0.989072	0.992827
M9PDX8	M9PDX8_DROME	nrv3	Nervana_3,_isoform_E	-0.393082	0.328762	0.449443
M9PDY5	M9PDY5_DROME	Girdin	Girdin,_isoform_C	-0.72426	0.000144658	0.00135086
M9PDZ8	M9PDZ8_DROME	CG1530	CG42593,_isoform_B	-0.2684	0.00695829	0.0233524
M9PE01	M9PE01_DROME	Eip63E	Ecdysone-induced_protein_63E,_isoform_N	-0.612451	0.00457169	0.0170009
M9PE14	M9PE14_DROME	mRpL23	Mitochondrial_ribosomal_protein_L23,_isoform_C	-0.0343355	0.85071	0.902633
M9PE30	M9PE30_DROME	Chd64	Chd64,_isoform_C	0.739367	4.92695e-05	0.000633068
M9PE35	M9PE35_DROME	RabX6	RabX6,_isoform_B	-0.251581	0.00757638	0.0248783
M9PEA0	M9PEA0_DROME	sls	Sallimus,_isoform_P	1.22312	6.80331e-07	3.10726e-05
M9PEA6	M9PEA6_DROME	RpS21	40S_ribosomal_protein_S21	-0.340631	0.00379499	0.0148189
M9PEB6	M9PEB6_DROME	Ptp10D	Protein_tyrosine_phosphatase_10D,_isoform_I	-0.0537207	0.579949	0.68444
M9PEC5	M9PEC5_DROME	CG33232	CG33232,_isoform_E	0.112822	0.247767	0.362065
M9PEE1	M9PEE1_DROME	smid	Smallminded,_isoform_H	0.090395	0.452368	0.569313
M9PEF6	M9PEF6_DROME	CG3714	CG3714,_isoform_H	-0.0905641	0.446456	0.563425
M9PEF9	M9PEF9_DROME	hep	Hemipterous,_isoform_D	-0.0034194	0.97355	0.982547
M9PEG6	M9PEG6_DROME	ZnT63C	ZnT63C,_isoform_F	0.0405437	0.803065	0.868216
M9PEH8	M9PEH8_DROME	CG10289	CG10289,_isoform_D	-0.00375725	0.968134	0.980739
M9PEI9	M9PEI9_DROME	CG11134	Probable_methylthioribulose-1-phosphate_dehydratase	0.292045	0.034827	0.0802383
M9PEJ9	M9PEJ9_DROME	CG5989	CG5989,_isoform_B	-0.538175	0.00112608	0.00608979
M9PEL1	M9PEL1_DROME	Rop	Ras_opposite,_isoform_B	0.23465	0.0696833	0.1367
M9PEL3	M9PEL3_DROME	qm	Quemao,_isoform_C	0.295271	0.00318445	0.0129439
M9PEL7	M9PEL7_DROME	ImpL2	Ecdysone-inducible_gene_L2,_isoform_D	-0.191636	0.355882	0.476178
M9PEP5	M9PEP5_DROME	CG6767	CG6767,_isoform_F	-0.297767	0.0197088	0.0509346
M9PEQ4	M9PEQ4_DROME	CG8177	CG8177,_isoform_M	0.204972	0.62471	0.72601
M9PER1	M9PER1_DROME	Atg18	Autophagy-specific_gene_18,_isoform_E	-0.556282	0.000216352	0.00182988
M9PES6	M9PES6_DROME	foi	Fear-of-intimacy,_isoform_B	0.164453	0.254431	0.369187
M9PET3	M9PET3_DROME	simj	Simjang,_isoform_D	0.0192025	0.897814	0.933401
M9PEU5	M9PEU5_DROME	APP-BP1	Beta-Amyloid_protein_binding_protein_1,_isoform_B	0.13333	0.235559	0.350029
M9PEV2	M9PEV2_DROME	CG5087	CG5087,_isoform_B	-0.62061	0.000396096	0.0028132
M9PEW8	M9PEW8_DROME	CG4452	CG4452,_isoform_E	-0.388906	0.00449982	0.0168083
M9PEX7	M9PEX7_DROME	CG3408	CG3408,_isoform_B	-0.172889	0.233718	0.348324
M9PEY6	M9PEY6_DROME	Rat1	Rat1,_isoform_B	-0.343752	0.00103229	0.00570541
M9PEY7	M9PEY7_DROME	Atg18	Autophagy-specific_gene_18,_isoform_D	-0.513728	4.70658e-05	0.000623035
M9PEZ2	M9PEZ2_DROME	CG10158	CG10158,_isoform_B	-0.386589	0.00681808	0.0229893
M9PEZ4	M9PEZ4_DROME	thoc6	Thoc6,_isoform_B	0.104724	0.384227	0.504219
M9PF14	M9PF14_DROME	tral	Trailer_hitch,_isoform_C	-0.903569	0.00029596	0.00227008
M9PF16	M9PF16_DROME	beta-Spec	Beta_spectrin,_isoform_B	-0.307208	0.0163021	0.0440094
M9PF24	M9PF24_DROME	Klc	Kinesin_light_chain,_isoform_B	-0.0693681	0.42164	0.539699
M9PF36	M9PF36_DROME	CG3529	CG3529,_isoform_C	0.0176534	0.86758	0.914826
M9PF40	M9PF40_DROME	l(3)01239	Lethal_(3)_01239,_isoform_B	-0.113643	0.323681	0.444796
M9PF57	M9PF57_DROME	CG33205	CG43897,_isoform_M	0.29952	0.128544	0.219091
M9PF60	M9PF60_DROME	Meics	Meiotic_central_spindle,_isoform_B	0.879613	1.52532e-05	0.000284187
M9PF68	M9PF68_DROME	Klp68D	Kinesin-like_protein_at_68D,_isoform_B	0.244591	0.217451	0.328959
M9PF88	M9PF88_DROME	SuUR	Suppressor_of_Under-Replication,_isoform_B	0.080772	0.431733	0.549069
M9PF96	M9PF96_DROME	Pmp70	Pmp70,_isoform_C	-0.333864	0.0329577	0.076793
M9PFB5	M9PFB5_DROME	alien	Alien,_isoform_D	-0.261185	0.0117803	0.0346105
M9PFE4	M9PFE4_DROME	Hip14	Palmitoyltransferase	0.543115	0.000479975	0.00327635
M9PFE5	M9PFE5_DROME	CG10732	CG10732,_isoform_D	-0.738054	4.71975e-05	0.000623035
M9PFF0	M9PFF0_DROME	RpL13	60S_ribosomal_protein_L13	-0.192699	0.190011	0.296465
M9PFG1	M9PFG1_DROME	l(3)72Dn	Lethal_(3)_72Dn,_isoform_B	0.333739	0.0094858	0.0297111
M9PFM5	M9PFM5_DROME	brm	Brahma,_isoform_F	-0.051067	0.752804	0.831941
M9PFN0	M9PFN0_DROME	CG5830	CG5830,_isoform_B	0.131619	0.266801	0.382427
M9PFN1	M9PFN1_DROME	rept	Reptin,_isoform_B	-0.170052	0.148482	0.244885
M9PFR6	M9PFR6_DROME	mbf1	Multiprotein_bridging_factor_1,_isoform_E	-1.36903	0.00239573	0.010385
M9PFR8	M9PFR8_DROME	CG32164	CG32164,_isoform_B	-0.19569	0.212296	0.323107
M9PFS0	M9PFS0_DROME	Tor	Target_of_rapamycin,_isoform_B	-0.244157	0.00957721	0.0298857
M9PFS8	M9PFS8_DROME	CG9705	CG9705,_isoform_C	-0.143597	0.205473	0.315397
M9PFT2	M9PFT2_DROME	CG3634	CG3634,_isoform_B	-0.171908	0.313918	0.433833
M9PFT9	M9PFT9_DROME	CycT	Cyclin_T,_isoform_C	-0.617306	0.0979277	0.176202
M9PFU7	M9PFU7_DROME	MED10	Mediator_complex_subunit_10,_isoform_C	-0.328575	0.0115696	0.0341514
M9PFV8	M9PFV8_DROME	rgn	Regeneration,_isoform_B	0.575123	0.0256469	0.0635292
M9PFV9	M9PFV9_DROME	TfIIS	RNA_polymerase_II_elongation_factor,_isoform_B	-0.375669	0.000643931	0.00405402
M9PFY2	M9PFY2_DROME	CG6479	CG6479,_isoform_C	0.350514	0.0698687	0.136957
M9PFZ1	M9PFZ1_DROME	Nopp140	Nopp140,_isoform_E	0.420989	0.0915337	0.168202
M9PFZ6	M9PFZ6_DROME	Act79B	Actin_79B,_isoform_B	1.71786	0.00671352	0.0227436
M9PG09	M9PG09_DROME	CG11370	CG11370,_isoform_B	-1.8705	0.00047741	0.00326328
M9PG20	M9PG20_DROME	CG3680	CG3680,_isoform_C	-0.403466	0.00440684	0.0165101
M9PG22	M9PG22_DROME	Arf79F	ADP_ribosylation_factor_79F,_isoform_J	-0.57731	7.73078e-05	0.000868891
M9PG40	M9PG40_DROME	CG40045	CG40045,_isoform_D	0.173468	0.0812722	0.153674
M9PG43	M9PG43_DROME	trc	Tricornered,_isoform_B	-0.0350883	0.772373	0.84651
M9PG47	M9PG47_DROME	RpS26	Ribosomal_protein_S26,_isoform_D	-0.439033	0.00572817	0.0201106
M9PG50	M9PG50_DROME	Cdk12	Cdk12,_isoform_C	-0.426734	0.0071346	0.023801
M9PG62	M9PG62_DROME	Rpn3	Regulatory_particle_non-ATPase_3,_isoform_B	-0.284606	0.00225199	0.00997705
M9PG72	M9PG72_DROME	su(w[a])	Suppressor_of_white-apricot,_isoform_K	-0.0450259	0.755027	0.83295
M9PG76	M9PG76_DROME	RpLP0	Ribosomal_protein_LP0,_isoform_B	-0.267693	0.063811	0.127826
M9PG81	M9PG81_DROME	CG11448	CG11448,_isoform_B	-0.0846835	0.489559	0.604756
M9PG98	M9PG98_DROME	Edem1	Edem1,_isoform_E	0.0293148	0.775947	0.847837
M9PGB6	M9PGB6_DROME	CG7519	CG7519,_isoform_B	-0.267036	0.0786931	0.149699
M9PGB8	M9PGB8_DROME	CG4293	CG4293,_isoform_E	0.30252	0.00219526	0.00984636
M9PGC4	M9PGC4_DROME	sgg	Shaggy,_isoform_P	0.123006	0.46921	0.585231
M9PGC5	M9PGC5_DROME	Wnk	Wnk,_isoform_E	-0.19	0.0182216	0.0478294
M9PGE3	M9PGE3_DROME	Syn1	Syntrophin-like_1,_isoform_C	0.263015	0.0847584	0.158766
M9PGF7	M9PGF7_DROME	Ten-m	Tenascin_major,_isoform_E	-0.023102	0.892982	0.930583
M9PGG4	M9PGG4_DROME	arm	Armadillo,_isoform_F	-0.0461241	0.843498	0.897634
M9PGG7	M9PGG7_DROME	CG11596	CG11596,_isoform_D	-0.0230093	0.846303	0.899857
M9PGH3	M9PGH3_DROME	Cht3	Chitinase_3,_isoform_B	-0.893445	0.0150568	0.0415634
M9PGI3	M9PGI3_DROME	PpV	Protein_phosphatase_V,_isoform_B	-0.0964327	0.288529	0.405815
M9PGI7	M9PGI7_DROME	CG7028	CG7028,_isoform_B	-0.179806	0.0394797	0.0880754
M9PGK3	M9PGK3_DROME	CG33692	CG43736,_isoform_I	0.0686798	0.629487	0.729201
M9PGL2	M9PGL2_DROME	CG11412	CG11412,_isoform_D	-0.132566	0.182616	0.287699
M9PGL7	M9PGL7_DROME	Tom40	Translocase_of_outer_membrane_40,_isoform_C	-0.140125	0.412133	0.530413
M9PGQ6	M9PGQ6_DROME	Bx42	Bx42,_isoform_B	-0.507727	0.00146701	0.00733357
M9PGS2	M9PGS2_DROME	usp	Ultraspiracle,_isoform_B	-0.189769	0.0451799	0.0977958
M9PGW0	M9PGW0_DROME	ogre	Innexin	-0.926858	0.00011479	0.00113748
M9PGW8	M9PGW8_DROME	bif	Bifocal,_isoform_D	-0.553366	0.0998133	0.178902
M9PGX7	M9PGX7_DROME	CG1140	Succinyl-CoA:3-ketoacid-coenzyme_A_transferase	0.926136	0.00028489	0.00220198
M9PGZ8	M9PGZ8_DROME	Smr	Smrter,_isoform_G	-0.183458	0.253352	0.368086
M9PH10	M9PH10_DROME	comt	Comatose,_isoform_B	-0.406416	0.0436844	0.0951736
M9PH13	M9PH13_DROME	CG15743	CG15743,_isoform_B	-0.00449078	0.979538	0.986971
M9PH19	M9PH19_DROME	msn	Misshapen,_isoform_F	0.170683	0.170746	0.273716
M9PH32	M9PH32_DROME	mei-P26	Mei-P26,_isoform_C	-0.494529	0.00548038	0.0195134
M9PH35	M9PH35_DROME	CtsB1	Cathepsin_B1,_isoform_B	0.359188	0.021347	0.0544679
M9PH59	M9PH59_DROME	RpL37a	Ribosomal_protein_L37	-0.343348	0.10238	0.182397
M9PH73	M9PH73_DROME	sog	Dorsal-ventral_patterning_protein_Sog	-0.5922	0.0174826	0.0464723
M9PH85	M9PH85_DROME	CG2061	CG2061,_isoform_D	-0.247756	0.0675707	0.133506
M9PH99	M9PH99_DROME	Gad1	Glutamic_acid_decarboxylase_1,_isoform_D	-0.519514	0.298941	0.417259
M9PHB3	M9PHB3_DROME	Sxl	Sex_lethal,_isoform_Y	-0.583448	0.00205684	0.00941124
M9PHC2	M9PHC2_DROME	CG1299	CG1299,_isoform_B	-0.496949	0.0527166	0.110584
M9PHC7	M9PHC7_DROME	CG2233	CG2233,_isoform_B	-0.327187	0.243247	0.357122
M9PHG0	M9PHG0_DROME	RhoGAPp190	RhoGAPp190,_isoform_D	-0.393697	0.00575469	0.0201451
M9PHI2	M9PHI2_DROME	Aats-his	Histidyl-tRNA_synthetase,_isoform_C	0.137095	0.313481	0.433506
M9PHI7	M9PHI7_DROME	CG5537	CG5537,_isoform_B	-0.0757634	0.604364	0.708477
M9PHK2	M9PHK2_DROME	Tao	Tao,_isoform_I	0.315855	0.00294653	0.012214
M9PHL0	M9PHL0_DROME	e(y)3	Enhancer_of_yellow_3,_isoform_B	-0.00872776	0.950775	0.970084
M9PHM6	M9PHM6_DROME	RpL18	60S_ribosomal_protein_L18	-0.146098	0.215014	0.326255
M9PHP6	M9PHP6_DROME	CG32521	CG32521,_isoform_G	-1.54539	3.23211e-05	0.000483237
M9PHP7	M9PHP7_DROME	frac	Faulty_attraction,_isoform_F	0.0577206	0.76428	0.840942
M9PHS1	M9PHS1_DROME	Clic	Chloride_intracellular_channel,_isoform_B	0.264591	0.322696	0.443685
M9PHS8	M9PHS8_DROME	CG9784	CG9784,_isoform_C	-0.451384	0.00146287	0.00732186
M9PHV1	M9PHV1_DROME	exd	Extradenticle,_isoform_D	0.0880942	0.625231	0.726235
M9PHV4	M9PHV4_DROME	CG42354	CG42354,_isoform_F	0.0322317	0.832331	0.890378
M9PHY9	M9PHY9_DROME	CG6674	CG6674,_isoform_B	-0.395135	0.068342	0.134647
M9PHZ8	M9PHZ8_DROME	NijA	Ninjurin_A,_isoform_D	1.16022	0.000327855	0.00244385
M9PI05	M9PI05_DROME	JIL-1	JIL-1,_isoform_C	0.0679042	0.768993	0.844464
M9PI14	M9PI14_DROME	NAA20	CG14222,_isoform_B	-0.470537	0.00362168	0.014282
M9PI17	M9PI17_DROME	CG6084	CG6084,_isoform_D	1.78099	2.80208e-07	1.56418e-05
M9PI40	M9PI40_DROME	CG10660	CG10660,_isoform_B	0.0858263	0.599922	0.704537
M9PI58	M9PI58_DROME	stwl	Stonewall,_isoform_B	0.0830387	0.561442	0.670282
M9PI59	M9PI59_DROME	shd	Shade,_isoform_D	-0.35174	0.0472713	0.101275
M9PI73	M9PI73_DROME	mib1	Mind_bomb_1,_isoform_B	-0.0757129	0.448893	0.565932
M9PI74	M9PI74_DROME	th	Thread,_isoform_D	-0.016865	0.891107	0.929786
M9PI82	M9PI82_DROME	Mo25	Mo25,_isoform_B	-0.125112	0.195449	0.303218
M9PI96	M9PI96_DROME	CG18135	CG18135,_isoform_E	-0.925863	0.00639382	0.0219872
M9PI97	M9PI97_DROME	MESR6	Misexpression_suppressor_of_ras_6,_isoform_B	0.59936	8.31591e-05	0.000910221
M9PIC3	M9PIC3_DROME	CG4825	CG4825,_isoform_B	-0.189544	0.386988	0.50697
M9PIG4	M9PIG4_DROME	Glg1	Golgi_complex-localized_glycoprotein_1,_isoform_B	-0.235639	0.0269673	0.0658647
M9PIG8	M9PIG8_DROME	Rpn10	Proteasome_54kD_subunit,_isoform_B	-0.182264	0.046287	0.0997623
M9PIM0	M9PIM0_DROME	RpL10	Ribosomal_protein_L10,_isoform_E	-0.303885	0.326928	0.447787
M9PIU6	M9PIU6_DROME	z	Zeste,_isoform_C	-1.02347	0.00137991	0.00704538
M9PJJ5	M9PJJ5_DROME	CG10352	CG10352,_isoform_B	-1.22036	0.00129083	0.00672033
M9PJM2	M9PJM2_DROME	HDAC4	HDAC4,_isoform_I	0.151707	0.106854	0.18896
M9PJN7	M9PJN7_DROME	l(1)G0136	Lethal_(1)_G0136,_isoform_B	0.00699705	0.970063	0.981788
M9PJN8	M9PJN8_DROME	Gapdh2	Glyceraldehyde_3_phosphate_dehydrogenase_2,_isoform_C	-0.654807	0.000381989	0.00273378
O01382	ICE_DROME	Ice	Caspase	-0.199251	0.0888494	0.164352
O01666	ATPG_DROME	ATPsyn-gamma	ATP_synthase_subunit_gamma,_mitochondrial	-0.0881472	0.565413	0.672817
O02193	MOF_DROME	mof	Males-absent_on_the_first_protein	0.873611	3.58417e-05	0.00052043
O02195	EIF3I_DROME	Trip1	Eukaryotic_translation_initiation_factor_3_subunit_I	-0.246236	0.0187423	0.048966
O02373	UGDH_DROME	sgl	UDP-glucose_6-dehydrogenase	0.600316	0.0257276	0.0635787
O02649	CH60_DROME	Hsp60	60_kDa_heat_shock_protein,_mitochondrial	0.360085	0.028319	0.0681066
O15943	CADN_DROME	CadN	Neural-cadherin	0.293483	0.13202	0.222947
O15971	O15971_DROME	Rab10	LD39986p	-0.235143	0.047982	0.102318
O16129	SYFM_DROME	Aats-phe	Probable_phenylalanine--tRNA_ligase,_mitochondrial	0.216547	0.311256	0.43126
O16158	O16158_DROME	Scp2	Calcium-binding_protein	0.848652	0.00108506	0.00593187
O16797	RL3_DROME	RpL3	60S_ribosomal_protein_L3	-0.148257	0.237316	0.351497
O17432	O17432_DROME	Cdk9	Cyclin-dependent_kinase_9	0.115785	0.178827	0.283148
O17452	O17452_DROME	Peritrophin-A	LD20793p	-0.46267	0.0205744	0.0529267
O17468	HIRA_DROME	Hira	Protein_HIRA_homolog	-0.0951747	0.339241	0.459303
O18332	O18332_DROME	Rab1	FI01544p	-0.322013	0.00816425	0.0264798
O18333	O18333_DROME	Rab2	GH01619p	0.187291	0.117268	0.204213
O18334	RAB6_DROME	Rab6	Ras-related_protein_Rab6	-0.160209	0.149959	0.246772
O18335	O18335_DROME	Rab11	Drab11	-0.122093	0.550223	0.6599
O18336	O18336_DROME	Rab14	MIP20481p	0.465228	0.000150796	0.00139971
O18339	O18339_DROME	Rab19	RE48347p	-0.63361	5.13651e-05	0.000646762
O18373	SPS1_DROME	SelD	Selenide,_water_dikinase	-0.011418	0.911707	0.944395
O18399	O18399_DROME	0	EG:152A3.5_protein_(Fbgn0003116	0.237972	0.0296226	0.07064
O18404	HCD2_DROME	scu	3-hydroxyacyl-CoA_dehydrogenase_type-2	-0.188112	0.266701	0.382393
O18405	SURF4_DROME	Surf4	Surfeit_locus_protein_4_homolog	-0.461324	0.000242612	0.00198515
O18408	AMYR_DROME	Amyrel	Alpha-amylase-related_protein	2.633	0.000104384	0.00106808
O18413	PRS8_DROME	Rpt6	26S_protease_regulatory_subunit_8	-0.215358	0.0215709	0.0548998
O18645	O18645_DROME	SNF1A	EG:132E8.2_protein	-0.198814	0.0670416	0.133024
O18680	O18680_DROME	Alas	5-aminolevulinate_synthase	0.723604	0.00409762	0.0156909
O44226	O44226_DROME	Elongin-B	Elongin_B	-0.470043	0.00280934	0.0117912
O44342	WBL_DROME	wbl	Protein_windbeutel	0.0883007	0.711705	0.797948
O44386-2	ITA3_DROME	scb	Isoform_A_of_Integrin_alpha-PS3	0.38404	0.00565339	0.0199597
O44434	O44434_DROME	qkr58E-3	QKR58E-3	-0.904939	3.73643e-05	0.000533291
O46037	VINC_DROME	Vinc	Vinculin	0.307507	0.0368303	0.0835752
O46048	O46048_DROME	east	EG:133E12.4_protein	-0.209858	0.359592	0.478758
O46050	O46050_DROME	Nmd3	EG:152A3.1_protein	-0.631461	0.000290344	0.00223383
O46052	O46052_DROME	EG:152A3.3	CG3630,_isoform_A	-0.565381	0.0296255	0.07064
O46067	O46067_DROME	EG:25E8.1	CG2918,_isoform_A	-0.125243	0.281422	0.398495
O46072	KZ_DROME	kz	Probable_ATP-dependent_RNA_helicase_kurz	0.249817	0.0278628	0.0672996
O46079	O46079_DROME	EG:39E1.2	CG3587	-0.60595	0.00575802	0.0201451
O46084	PGAM5_DROME	Pgam5	Serine/threonine-protein_phosphatase_Pgam5,_mitochondrial	-0.068563	0.368656	0.487915
O46085	O46085_DROME	Pex5	GH08708p	-1.21625	1.14541e-05	0.000231105
O46094	O46094_DROME	Ocrl	EG:86E4.5_protein	-0.121972	0.245223	0.359289
O46102	O46102_DROME	fs(1)N	CG11418,_isoform_A	0.257197	0.0884569	0.163927
O46106	NOI_DROME	noi	Splicing_factor_3A_subunit_3	-0.0319266	0.742908	0.823377
O46307	O46307_DROME	fs(1)N	CG11417	-0.100056	0.259631	0.374927
O46339	HTH_DROME	hth	Homeobox_protein_homothorax	-0.488461	0.202375	0.311881
O61305	DDX19_DROME	Dbp80	DEAD-box_helicase_Dbp80	0.991768	2.45417e-06	7.65823e-05
O61345	PEN_DROME	pen	Protein_penguin	0.257138	0.0109988	0.0330294
O61348	O61348_DROME	bbx	Bobby_sox	-0.266854	0.271281	0.387192
O61360	O61360_DROME	crol	CROL_ALPHA	-0.852811	0.0120396	0.0351463
O61443	MK14B_DROME	p38b	Mitogen-activated_protein_kinase_14B	0.402966	7.99851e-05	0.000891009
O61444	O61444_DROME	Mkk4	MAP_kinase_kinase_4,_isoform_A	-0.143162	0.137908	0.231336
O61491	FLOT1_DROME	Flo-1	Flotillin-1	0.0998428	0.246973	0.361116
O61602	O61602_DROME	apt	Apontic	0.0306004	0.848897	0.90128
O61604	O61604_DROME	Fim	Fimbrin	0.486756	0.00370682	0.0145606
O61613	NMT_DROME	Nmt	Glycylpeptide_N-tetradecanoyltransferase	-0.0277804	0.790052	0.858581
O61722	O61722_DROME	PRL-1	PRL-1,_isoform_A	-0.109933	0.238189	0.35227
O62526	O62526_DROME	Ant2	ADP/ATP_translocase	0.0364428	0.810227	0.87389
O62530	O62530_DROME	AP-2mu	AP-50,_isoform_A	0.106862	0.312249	0.432397
O62531	O62531_DROME	AP-1mu	AP-47	0.312779	0.00177113	0.00845831
O62602	O62602_DROME	lic	Licorne	0.0784349	0.496342	0.611032
O62609	O62609_DROME	Med	LD22279p	-0.159877	0.241666	0.355529
O62619	KPYK_DROME	PyK	Pyruvate_kinase	-0.475946	0.00552543	0.0196182
O62621	COPB2_DROME	beta'Cop	Coatomer_subunit_beta'	-0.214373	0.0778865	0.148502
O76206	RIFK_DROME	anon-84Ea	Putative_riboflavin_kinase	0.0859934	0.57687	0.681768
O76324	DCO_DROME	dco	Discs_overgrown_protein_kinase	0.00719079	0.952026	0.971049
O76454	PHS_DROME	Pcd	Pterin-4-alpha-carbinolamine_dehydratase	-0.377752	0.0181348	0.0476761
O76462	O76462_DROME	Bem46	Bem46	0.353043	0.00519528	0.018657
O76464	NFT1_DROME	NitFhit	Nitrilase_and_fragile_histidine_triad_fusion_protein_NitFhit	-1.01411	1.23883e-06	4.61027e-05
O76511	TYSY_DROME	Ts	Thymidylate_synthase	0.642365	0.000876495	0.00503258
O76513	O76513_DROME	CycH	Cyclin_H	0.460855	0.0150977	0.0416534
O76521	O76521_DROME	Kap-alpha1	Importin_subunit_alpha	-0.298541	0.0100697	0.0309611
O76742	O76742_DROME	Rab7	CG5915_protein	-0.327376	0.0105841	0.0321192
O76752	O76752_DROME	Sptr	CG12117-PA	1.24884	2.06906e-06	6.70095e-05
O76767	ERD2_DROME	KdelR	ER_lumen_protein_retaining_receptor	-0.214217	0.337141	0.457289
O76861	O76861_DROME	CG2685-RA	CG2685	-0.288937	0.00239916	0.0103908
O76863	O76863_DROME	eIF2B-beta	EG:100G10.3_protein	0.0588435	0.475333	0.590961
O76874	O76874_DROME	EG:125H10.1	CG3777,_isoform_A	-1.25424	0.00411247	0.0157118
O76877	O76877_DROME	EG:132E8.3	CG3719	0.394636	0.00741242	0.0245
O76895	O76895_DROME	arg	Arginase	0.502723	0.0588566	0.12025
O76902	O76902_DROME	rush	EG:80H7.5_protein	-0.340231	0.00417101	0.0158751
O76912	O76912_DROME	crm	CG2701	0.956522	8.06274e-06	0.000183198
O76928	O76928_DROME	cm	Carmine,_isoform_A	-0.145428	0.0859072	0.160326
O76932	PP4C_DROME	Pp4-19C	Serine/threonine-protein_phosphatase_4_catalytic_subunit	-0.209139	0.0543653	0.112743
O76994	O76994_DROME	Ip259	GM13959p	0.319347	0.00818664	0.0265011
O77051	E2F2_DROME	E2f2	Transcription_factor_E2F2	-0.9809	2.37024e-06	7.44255e-05
O77062	O77062_DROME	Eaat1	Excitatory_amino_acid_transporter_1,_isoform_A	-1.03821	0.000492409	0.00333153
O77134	O77134_DROME	c550	9_kD_basic_protein	-0.167509	0.553486	0.663568
O77259	O77259_DROME	mod(r)	EG:115C2.5_protein	-0.512635	0.000568774	0.00369576
O77264	RTCA_DROME	CG4061	RNA_3'-terminal_phosphate_cyclase	-0.974208	6.44567e-06	0.00015644
O77277	TORS_DROME	Torsin	Torsin-like_protein	-0.128885	0.250335	0.364969
O77410	EIF3E_DROME	eIF3-S6	Eukaryotic_translation_initiation_factor_3_subunit_E	-0.497838	0.000730912	0.00442199
O77425	O77425_DROME	Dredd	CG13369	0.619317	0.000661839	0.00413086
O77430	O77430_DROME	skpA	EG:115C2.4_protein	-0.137377	0.126962	0.217106
O77434	O77434_DROME	Sec22	EG:34F3.8_protein	0.0573014	0.5758	0.68122
O77436	O77436_DROME	EG:34F3.5	CG13360	-0.884357	0.0674129	0.133287
O77477	O77477_DROME	CG4882	CG4882	-0.0304996	0.822152	0.882584
O96299	O96299_DROME	Sodh-2	LD47736p	0.736496	0.000311933	0.00236017
O96539	ATE1_DROME	Ate1	Arginyl-tRNA--protein_transferase_1	-0.318767	0.00767061	0.0250893
O96539-4	ATE1_DROME	Ate1	Isoform_C_of_Arginyl-tRNA--protein_transferase_1	0.211976	0.0930987	0.170319
O96553	C1TC_DROME	pug	C-1-tetrahydrofolate_synthase,_cytoplasmic	-0.482216	0.101045	0.180456
O96651	TOP3B_DROME	Top3beta	DNA_topoisomerase_3-beta	-0.253946	0.00507998	0.0183875
O96660	O96660_DROME	Smox	LD15813p	-0.21504	0.0169134	0.0453138
O96676	O96676_DROME	CBP	BcDNA.GH12350	-0.0314595	0.89185	0.930175
O96689	O96689_DROME	vtd	FI11703p	-0.0398497	0.812909	0.875644
O96692	O96692_DROME	Rap2l	RE63021p	0.0066989	0.940762	0.962997
O96824	O96824_DROME	EG:131F2.3	CG14812,_isoform_A	-0.177364	0.0892243	0.164863
O96827	EF1B_DROME	Ef1beta	Probable_elongation_factor_1-beta	-0.170253	0.240274	0.354539
O96838	FYV1_DROME	fab1	Putative_1-phosphatidylinositol_3-phosphate_5-kinase	0.0332141	0.660433	0.755296
O96880	O96880_DROME	TfIIEalpha	GH11150p	0.176975	0.228681	0.342953
O97061	O97061_DROME	Ccp84Ad	Ccp84Ad	-0.167542	0.684914	0.775002
O97062	O97062_DROME	Ccp84Ae	Ccp84Ae	-1.38493	0.00299981	0.0123939
O97063	O97063_DROME	Ccp84Af	Ccp84Af	-0.418688	0.0911587	0.167759
O97064	O97064_DROME	Ccp84Ag	Ccp84Ag	-2.0265	0.000277642	0.00215591
O97066	O97066_DROME	twr	GM04682p	-0.359901	0.00445889	0.0166802
O97102	O97102_DROME	smt3	LD07775p	-0.533636	0.0279684	0.0674896
O97125	HSP68_DROME	Hsp68	Heat_shock_protein_68	0.0260397	0.851993	0.903231
O97172	U729_DROME	CG18508	UPF0729_protein_CG18508	-0.228318	0.0517317	0.108973
O97182	O97182_DROME	Arpc1	Actin_related_complex_p41_subunit	0.157521	0.265835	0.381663
O97183	O97183_DROME	RpII33	GH07456p	-0.00876545	0.937354	0.96186
O97365	O97365_DROME	BM-40-SPARC	BM-40_(Precursor)	0.435014	0.0276835	0.0669952
O97418	O97418_DROME	CG3621-RA	CG3621	-0.128969	0.288479	0.405815
O97422	B3GI_DROME	GlcAT-I	Galactosylgalactosylxylosylprotein_3-beta-glucuronosyltransferase_I	-0.310259	0.0286389	0.0687443
O97428	O97428_DROME	cib	Ciboulot,_isoform_A	0.163029	0.7417	0.822583
O97454	O97454_DROME	l(1)10Bb	L(1)10Bb	0.123377	0.45358	0.57041
O97477	INO1_DROME	Inos	Inositol-3-phosphate_synthase	1.50997	0.00314849	0.0128706
O97479	O97479_DROME	Sodh-1	FI05212p	0.622938	0.0576982	0.118413
P00334	ADH_DROME	Adh	Alcohol_dehydrogenase	-0.501447	0.135324	0.227761
P00399	COX1_DROME	mt:CoI	Cytochrome_c_oxidase_subunit_1	0.148216	0.346642	0.466311
P00408	COX2_DROME	mt:CoII	Cytochrome_c_oxidase_subunit_2	-0.169707	0.307854	0.4269
P00417	COX3_DROME	mt:CoIII	Cytochrome_c_oxidase_subunit_3	-0.562821	0.0464394	0.0999622
P00967	PUR2_DROME	ade3	Trifunctional_purine_biosynthetic_protein_adenosine-3	0.449559	0.0874104	0.162347
P02255	H1_DROME	His1	Histone_H1	-0.972916	0.000895792	0.00511416
P02283	H2B_DROME	His2B	Histone_H2B	-0.162896	0.260564	0.375846
P02515	HSP22_DROME	Hsp22	Heat_shock_protein_22	0.945049	0.000273645	0.00213559
P02517	HSP26_DROME	Hsp26	Heat_shock_protein_26	0.155849	0.375504	0.495165
P02518	HSP27_DROME	Hsp27	Heat_shock_protein_27	0.0373005	0.800532	0.866596
P02572	ACT2_DROME	Act42A	Actin-42A	0.458243	0.00478347	0.0176189
P02825	HSP71_DROME	Hsp70Ab	Major_heat_shock_70_kDa_protein_Ab	2.0701	2.83459e-09	4.5475e-07
P02840	SGS3_DROME	Sgs3	Salivary_glue_protein_Sgs-3	-0.922152	0.0858716	0.160319
P02842	SGS8_DROME	Sgs8	Salivary_glue_protein_Sgs-8	-1.75276	0.0011703	0.00625487
P02843	VIT1_DROME	Yp1	Vitellogenin-1	0.551446	0.272878	0.388919
P02844	VIT2_DROME	Yp2	Vitellogenin-2	2.57055	0.0105871	0.0321192
P04052	RPB1_DROME	RpII215	DNA-directed_RNA_polymerase_II_subunit_RPB1	-0.203875	0.0395281	0.0881444
P04197	MYB_DROME	Myb	Myb_protein	-0.274583	0.168049	0.270158
P04359	RL32_DROME	RpL32	60S_ribosomal_protein_L32	-0.368242	0.0116412	0.0343224
P04388	RAS2_DROME	Ras64B	Ras-like_protein_2	0.245488	0.0498018	0.10575
P05205	HP1_DROME	Su(var)205	Heterochromatin_protein_1	-0.130988	0.384287	0.504219
P05389	RLA2_DROME	RpLP2	60S_acidic_ribosomal_protein_P2	-0.739519	0.0104596	0.0318384
P05552	ADF1_DROME	Adf1	Transcription_factor_Adf-1	-0.520667	0.0184233	0.0483083
P05661-10	MYSA_DROME	Mhc	Isoform_11b_of_Myosin_heavy_chain,_muscle	1.43374	0.000845317	0.00491536
P05661-18	MYSA_DROME	Mhc	Isoform_E_of_Myosin_heavy_chain,_muscle	1.49307	0.00292354	0.0121287
P05812	HSP6A_DROME	Hsp67Ba	Heat_shock_protein_67B1	0.901083	0.0231031	0.058035
P05990	PYR1_DROME	r	CAD_protein	-0.213879	0.180085	0.284512
P06604	TBA2_DROME	alphaTub85E	Tubulin_alpha-2_chain	2.56449	6.22709e-05	0.000744878
P06607	VIT3_DROME	Yp3	Vitellogenin-3	2.78782	0.000138094	0.0013041
P06742	MLC1_DROME	Mlc1	Myosin_light_chain_alkali	1.01733	0.0159991	0.0434954
P06742-2	MLC1_DROME	Mlc1	Isoform_Indirect_flight_muscle_of_Myosin_light_chain_alkali	1.14633	0.251515	0.366264
P06754-2	TPM1_DROME	Tm1	Isoform_A_of_Tropomyosin-1,_isoforms_9A/A/B	0.018568	0.891604	0.930112
P07190	MAL1_DROME	Mal-A1	Maltase_A1	1.67922	0.0191081	0.0497411
P07192	MAL3_DROME	Mal-A3	Maltase_A3	2.81597	7.31637e-05	0.000840304
P07486	G3P1_DROME	Gapdh1	Glyceraldehyde-3-phosphate_dehydrogenase_1	-0.426437	0.0152201	0.041876
P07664	SRYD_DROME	Sry-delta	Serendipity_locus_protein_delta	0.317114	0.0138147	0.0389479
P07665	SRYB_DROME	Sry-beta	Serendipity_locus_protein_beta	-0.0473746	0.78644	0.855396
P07701	SGS5_DROME	Sgs5	Salivary_glue_protein_Sgs-5	-0.979471	0.131974	0.222947
P07764	ALF_DROME	Ald	Fructose-bisphosphate_aldolase	-0.88369	2.27729e-05	0.000371464
P08120	CO4A1_DROME	Cg25C	Collagen_alpha-1(IV)_chain	0.553884	0.00597986	0.0208486
P08144	AMYA_DROME	Amy-p	Alpha-amylase_A	1.43909	0.000626932	0.00397189
P08266	RPB2_DROME	RpII140	DNA-directed_RNA_polymerase_II_subunit_RPB2	-0.00414715	0.962618	0.977601
P08630	BTKL_DROME	Btk29A	Tyrosine-protein_kinase_Btk29A	0.2631	0.0728529	0.140991
P08646	RAS1_DROME	Ras85D	Ras-like_protein_1	0.159197	0.143818	0.239173
P08736	EF1A1_DROME	Ef1alpha48D	Elongation_factor_1-alpha_1	-1.19978	0.015957	0.0434278
P08841	TBB3_DROME	betaTub60D	Tubulin_beta-3_chain	0.21343	0.0329788	0.076793
P08879	NDKA_DROME	awd	Nucleoside_diphosphate_kinase	-0.351684	0.0285652	0.0686659
P08953	TOLL_DROME	Tl	Protein_toll	-0.238638	0.240332	0.354539
P08970	SUHW_DROME	su(Hw)	Protein_suppressor_of_hairy_wing	-0.362575	0.0143201	0.039874
P09180	RL4_DROME	RpL4	60S_ribosomal_protein_L4	-0.311866	0.00433088	0.0163228
P09208	INSR_DROME	InR	Insulin-like_receptor	-0.543107	0.00282256	0.011827
P09491	TPM2_DROME	Tm2	Tropomyosin-2	0.739694	0.0223967	0.0566002
P0DKM0	COA3_DROME	Ccdc56	Cytochrome_c_oxidase_assembly_factor_3,_mitochondrial	-0.0980798	0.500086	0.614587
P10040	CRB_DROME	crb	Protein_crumbs	-0.283728	0.101076	0.180456
P10090	WHITE_DROME	w	Protein_white	3.66247	7.11847e-14	3.57632e-10
P10351	XDH_DROME	ry	Xanthine_dehydrogenase	1.35476	5.95075e-05	0.000723887
P10379	UZIP_DROME	uzip	Protein_unzipped	-0.232396	0.298991	0.417259
P10987	ACT1_DROME	Act5C	Actin-5C	0.63457	0.0016962	0.00817037
P11046	LAMB1_DROME	LanB1	Laminin_subunit_beta-1	0.630758	1.10042e-05	0.000223934
P11147	HSP7D_DROME	Hsc70-4	Heat_shock_70_kDa_protein_cognate_4	0.174332	0.063347	0.127302
P11346	KRAF1_DROME	phl	Raf_homolog_serine/threonine-protein_kinase_phl	-0.0255242	0.858891	0.909201
P11584	ITBX_DROME	mys	Integrin_beta-PS	0.336428	0.0127518	0.0367345
P11995	LSP1A_DROME	Lsp1alpha	Larval_serum_protein_1_alpha_chain	-0.163319	0.662886	0.756723
P11996	LSP1B_DROME	Lsp1beta	Larval_serum_protein_1_beta_chain	-0.696211	0.0501487	0.106307
P11997	LSP1G_DROME	Lsp1gamma	Larval_serum_protein_1_gamma_chain	-1.53667	0.000183212	0.00161768
P12080	ITA2_DROME	if	Integrin_alpha-PS2	-0.00457518	0.968506	0.980805
P12370	KAPC_DROME	Pka-C1	cAMP-dependent_protein_kinase_catalytic_subunit	0.20617	0.120582	0.208755
P12426	APT_DROME	Aprt	Adenine_phosphoribosyltransferase	-0.335824	0.0477108	0.101956
P12646	G6PD_DROME	Zw	Glucose-6-phosphate_1-dehydrogenase	-0.637215	0.0180381	0.0474965
P12881	PSA1_DROME	Prosalpha6	Proteasome_subunit_alpha_type-1	-0.395186	0.000560996	0.00366508
P12982	PP12_DROME	Pp1-87B	Serine/threonine-protein_phosphatase_alpha-2_isoform	-0.172024	0.166908	0.269023
P13002-1	ELF1_DROME	grh	Isoform_N_of_Protein_grainyhead	-1.26683	6.18207e-06	0.000153756
P13060	EF2_DROME	EF2	Elongation_factor_2	-0.0161674	0.905765	0.939035
P13469	MODU_DROME	mod	DNA-binding_protein_modulo	0.185677	0.122752	0.211369
P13496	DCTN1_DROME	Gl	Dynactin_subunit_1	-0.0558253	0.434016	0.550352
P13607	ATNA_DROME	Atpalpha	Sodium/potassium-transporting_ATPase_subunit_alpha	0.295166	0.0694256	0.136248
P14130	RS14_DROME	RpS14a	40S_ribosomal_protein_S14	-0.5167	0.000669773	0.00416453
P14199	REF2P_DROME	ref(2)P	Protein_ref(2)P	-0.247818	0.189888	0.29646
P14318	MP20_DROME	Mp20	Muscle-specific_protein_20	0.710585	0.105198	0.186557
P15007	ENO_DROME	Eno	Enolase	-0.579403	0.000815835	0.00478827
P15215	LAMC1_DROME	LanB2	Laminin_subunit_gamma-1	0.569675	2.20248e-05	0.000361611
P15330	DORS_DROME	dl	Embryonic_polarity_protein_dorsal	0.598059	0.000394369	0.00280639
P15357	RS27A_DROME	RpS27A	Ubiquitin-40S_ribosomal_protein_S27a	-0.283298	0.00416787	0.0158751
P16163	URIC_DROME	Uro	Uricase	3.38	0.00385033	0.014949
P16371	GROU_DROME	gro	Protein_groucho	-0.0236877	0.875061	0.919922
P16378	GNAO_DROME	Galphao	G_protein_alpha_o_subunit	0.222973	0.154278	0.252391
P16620	PTP69_DROME	Ptp69D	Tyrosine-protein_phosphatase_69D	-0.184443	0.0874836	0.162423
P17210	KINH_DROME	Khc	Kinesin_heavy_chain	-0.1273	0.255233	0.37007
P17336	CATA_DROME	Cat	Catalase	0.564762	0.0796899	0.151308
P17704	RS17_DROME	RpS17	40S_ribosomal_protein_S17	-0.0818049	0.541891	0.652555
P17719	DYR_DROME	Dhfr	Dihydrofolate_reductase	-0.170166	0.0758062	0.145585
P17789	TTKB_DROME	ttk	Protein_tramtrack,_beta_isoform	-0.102548	0.334815	0.455117
P17886	CRN_DROME	crn	Protein_crooked_neck	-0.075625	0.348354	0.467574
P17917	PCNA_DROME	PCNA	Proliferating_cell_nuclear_antigen	-0.608246	0.000814411	0.0047855
P18053	PSA4_DROME	Prosalpha3	Proteasome_subunit_alpha_type-4	-0.0403667	0.646781	0.743916
P18106	FPS_DROME	Fps85D	Tyrosine-protein_kinase_Fps85D	-0.166743	0.0528275	0.11077
P18173	DHGL_DROME	Gld	Glucose_dehydrogenase_[FAD,_quinone]	0.374401	0.0843798	0.158181
P18432	MLR_DROME	Mlc2	Myosin_regulatory_light_chain_2	1.35612	0.00330441	0.0133237
P18489	SYB_DROME	Syb	Synaptobrevin	-0.33076	0.0242327	0.0604036
P18929	NU1M_DROME	mt:ND1	NADH-ubiquinone_oxidoreductase_chain_1	0.276275	0.0316011	0.0743277
P18930	NU3M_DROME	mt:ND3	NADH-ubiquinone_oxidoreductase_chain_3	-0.1622	0.478111	0.593827
P18934	NU4LM_DROME	mt:ND4L	NADH-ubiquinone_oxidoreductase_chain_4L	-0.350485	0.390909	0.509846
P18935	CYB_DROME	mt:Cyt-b	Cytochrome_b	-0.389822	0.0311491	0.0735055
P19109	DDX17_DROME	Rm62	ATP-dependent_RNA_helicase_p62	0.122357	0.176032	0.280045
P19339-7	SXL_DROME	Sxl	Isoform_G_of_Protein_sex-lethal	-1.48831	0.000138613	0.00130475
P19538	CI_DROME	ci	Transcriptional_activator_cubitus_interruptus	-0.190508	0.108279	0.191143
P20007	PCKG_DROME	Pepck	Phosphoenolpyruvate_carboxykinase_[GTP]	-1.15518	0.0123652	0.0358263
P20028	RPA2_DROME	RpI135	DNA-directed_RNA_polymerase_I_subunit_RPA2	0.0809521	0.400003	0.51875
P20240	OTE_DROME	Ote	Otefin	-1.14634	0.0001371	0.0013001
P20348	JANA_DROME	janA	Sex-regulated_protein_janus-A	-2.0855	2.95163e-11	2.11842e-08
P20351	T23O_DROME	v	Tryptophan_2,3-dioxygenase	-0.01439	0.938352	0.962065
P20353	GNAI_DROME	Galphai	G_protein_alpha_i_subunit	0.316334	0.0140424	0.039369
P20354	GNAS_DROME	Galphas	G_protein_alpha_s_subunit	-0.0175295	0.847019	0.900429
P20432	GSTT1_DROME	GstD1	Glutathione_S-transferase_1-1	1.42485	4.82491e-05	0.000626366
P20478	GLNA2_DROME	Gs2	Glutamine_synthetase_2_cytoplasmic	1.51614	1.52728e-05	0.000284187
P20478-3	GLNA2_DROME	Gs2	Isoform_B_of_Glutamine_synthetase_2_cytoplasmic	0.298813	0.573673	0.680179
P21187	PABP_DROME	pAbp	Polyadenylate-binding_protein	-0.540402	0.000192571	0.00167109
P21461	SINA_DROME	sina	E3_ubiquitin-protein_ligase_sina	-0.221538	0.0830178	0.156093
P21521	SY65_DROME	Syt1	Synaptotagmin_1	-1.64914	2.00276e-05	0.000337813
P21914	SDHB_DROME	SdhB	Succinate_dehydrogenase_[ubiquinone]_iron-sulfur_subunit,_mitochondrial	0.631669	0.000735995	0.00443483
P22293	SUS_DROME	su(s)	Protein_suppressor_of_sable	-0.209577	0.102564	0.182529
P22464	ANXB9_DROME	AnxB9	Annexin_B9	0.136406	0.216241	0.327572
P22465	ANX10_DROME	AnxB10	Annexin_B10	-0.0830302	0.548649	0.658641
P22700	ATC1_DROME	Ca-P60A	Calcium-transporting_ATPase_sarcoplasmic/endoplasmic_reticulum_type	0.384706	0.0228459	0.0575617
P22769	PSA71_DROME	Prosalpha4	Proteasome_subunit_alpha_type-7-1	0.0163563	0.829238	0.888293
P22813	HSF_DROME	Hsf	Heat_shock_factor_protein	-0.154498	0.431659	0.549069
P22817	IDE_DROME	Ide	Insulin-degrading_enzyme	-0.0619205	0.564771	0.672371
P23128	DDX6_DROME	me31B	Putative_ATP-dependent_RNA_helicase_me31b	-0.22907	0.027867	0.0672996
P23226	MA205_DROME	Map205	205_kDa_microtubule-associated_protein	-0.257507	0.276869	0.393268
P23380	VATL_DROME	Vha16-1	V-type_proton_ATPase_16_kDa_proteolipid_subunit	0.710715	0.000226309	0.00188867
P23625-2	GNAQ_DROME	Galphaq	Isoform_A_of_G_protein_alpha_q_subunit	-0.432586	0.00101885	0.00565604
P23696	PP2A_DROME	mts	Serine/threonine-protein_phosphatase_PP2A	-0.0108183	0.922424	0.950856
P23779	CYTL_DROME	Cys	Cystatin-like_protein	-0.0279061	0.859541	0.909336
P24156	L2CC_DROME	l(2)37Cc	Protein_l(2)37Cc	0.000879219	0.994443	0.996029
P24785	MLE_DROME	mle	Dosage_compensation_regulator	-0.0392557	0.680254	0.771746
P25007	PPIA_DROME	Cyp1	Peptidyl-prolyl_cis-trans_isomerase	-0.0263252	0.778877	0.849561
P25160	ARL1_DROME	Arl1	ADP-ribosylation_factor-like_protein_1	-0.212113	0.0697407	0.136759
P25167	RPC2_DROME	RpIII128	DNA-directed_RNA_polymerase_III_subunit_RPC2	-0.156335	0.33582	0.455866
P25171	RCC1_DROME	Rcc1	Regulator_of_chromosome_condensation	0.0491343	0.82133	0.881928
P25228	RAB3_DROME	Rab3	Ras-related_protein_Rab-3	-0.526381	0.171656	0.27465
P25822	PUM_DROME	pum	Maternal_protein_pumilio	0.184614	0.301577	0.42005
P25823	TUD_DROME	tud	Maternal_protein_tudor	-0.407292	0.00817618	0.0264945
P25867	UBCD1_DROME	eff	Ubiquitin-conjugating_enzyme_E2-17_kDa	-0.161324	0.200785	0.310383
P25991	SUF_DROME	su(f)	Protein_suppressor_of_forked	0.166472	0.053187	0.11113
P26019	DPOLA_DROME	DNApol-alpha180	DNA_polymerase_alpha_catalytic_subunit	0.427968	0.0353732	0.0811094
P26270	PSMD7_DROME	Rpn8	26S_proteasome_non-ATPase_regulatory_subunit_7	-0.416499	0.000685165	0.0042133
P26675	SOS_DROME	Sos	Protein_son_of_sevenless	-0.259538	0.0253106	0.0627952
P26686	SRR55_DROME	B52	Serine-arginine_protein_55	-0.0147071	0.886234	0.927012
P26802	DDX51_DROME	Dbp73D	Probable_ATP-dependent_RNA_helicase_Dbp73D	0.055288	0.562555	0.671325
P28668	SYEP_DROME	Aats-glupro	Bifunctional_glutamate/proline--tRNA_ligase	-0.447849	0.00145657	0.00730322
P29310-2	1433Z_DROME	14-3-3zeta	Isoform_VI'_of_14-3-3_protein_zeta	-0.309032	0.00102062	0.0056596
P29327	RS6_DROME	RpS6	40S_ribosomal_protein_S6	-0.390611	0.00703348	0.0235732
P29349	CSW_DROME	csw	Tyrosine-protein_phosphatase_corkscrew	-0.403967	0.00568223	0.0199773
P29413	CALR_DROME	Crc	Calreticulin	-0.307106	0.0535056	0.11154
P29613	TPIS_DROME	Tpi	Triosephosphate_isomerase	-0.49798	0.0158194	0.0431145
P29742	CLH_DROME	Chc	Clathrin_heavy_chain	0.203352	0.0151822	0.0417948
P29843	HSP7A_DROME	Hsc70-1	Heat_shock_70_kDa_protein_cognate_1	1.084	0.0410314	0.0909315
P29844	HSP7C_DROME	Hsc70-3	Heat_shock_70_kDa_protein_cognate_3	-0.714049	1.94797e-05	0.000332877
P29845	HSP7E_DROME	Hsc70-5	Heat_shock_70_kDa_protein_cognate_5	-0.0276495	0.882722	0.924652
P29993	ITPR_DROME	Itp-r83A	Inositol_1,4,5-trisphosphate_receptor	0.181287	0.134116	0.225879
P30430	FUR1C_DROME	Fur1	Furin-like_protease_1,_isoform_1-CRR	-0.252039	0.12534	0.214844
P32100	RL7_DROME	RpL7	60S_ribosomal_protein_L7	-0.153554	0.209203	0.319756
P32234	128UP_DROME	128up	GTP-binding_protein_128up	-0.353768	0.00376401	0.0147542
P32392	ARP3_DROME	Arp3	Actin-related_protein_3	0.410743	0.000650558	0.00407531
P32748	PYRD_DROME	Dhod	Dihydroorotate_dehydrogenase_(quinone),_mitochondrial	-0.0320112	0.699811	0.787777
P32866	GPRK2_DROME	Gprk2	G_protein-coupled_receptor_kinase_2	-0.298179	0.0016912	0.00815412
P33269	CP4D1_DROME	Cyp4d1	Cytochrome_P450_4d1	-2.35971	5.37954e-06	0.000137892
P33269-2	CP4D1_DROME	Cyp4d1	Isoform_Short_of_Cytochrome_P450_4d1	-2.40213	8.5781e-06	0.00019108
P33270	CP6A2_DROME	Cyp6a2	Cytochrome_P450_6a2	1.31868	0.000328344	0.00244385
P35220	CTNA_DROME	alpha-Cat	Catenin_alpha	0.0368431	0.852744	0.903837
P35381	ATPA_DROME	blw	ATP_synthase_subunit_alpha,_mitochondrial	-0.0491479	0.751152	0.830499
P35421	PUR4_DROME	ade2	Phosphoribosylformylglycinamidine_synthase	0.323084	0.0821587	0.155
P35600	RFC1_DROME	Gnf1	Replication_factor_C_subunit_1	0.0228339	0.844348	0.898349
P35832	PTP99_DROME	Ptp99A	Tyrosine-protein_phosphatase_99A	-0.0939037	0.423199	0.541006
P35875	PARP_DROME	Parp	Poly_[ADP-ribose]_polymerase	1.22167	2.20259e-07	1.25748e-05
P36241	RL19_DROME	RpL19	60S_ribosomal_protein_L19	-0.509255	0.0263753	0.0647651
P36872	2ABA_DROME	tws	Protein_phosphatase_PP2A_55_kDa_regulatory_subunit	-0.0709207	0.470225	0.586206
P36951	HYI_DROME	Gip	Putative_hydroxypyruvate_isomerase	0.16862	0.272204	0.388185
P36958	RPB9_DROME	RpII15	DNA-directed_RNA_polymerase_II_subunit_RPB9	-0.00632398	0.94712	0.967412
P37161	LYSX_DROME	LysX	Lysozyme_X	3.39791	9.94113e-12	1.21481e-08
P38040	GBG1_DROME	Ggamma1	Guanine_nucleotide-binding_protein_subunit_gamma-1	-0.240295	0.243553	0.357259
P38979	RSSA_DROME	sta	40S_ribosomal_protein_SA	-0.354369	0.00194139	0.00903106
P39205	CIN_DROME	cin	Molybdenum_cofactor_synthesis_protein_cinnamon	-0.328709	0.0083308	0.0268467
P39769	PHP_DROME	ph-p	Polyhomeotic-proximal_chromatin_protein	-0.4989	0.123126	0.211772
P40301	PSA2_DROME	Prosalpha2	Proteasome_subunit_alpha_type-2	-0.211213	0.10645	0.188445
P40304	PSB1_DROME	Prosbeta6	Proteasome_subunit_beta_type-1	0.0054206	0.943898	0.965224
P40320	METK_DROME	Sam-S	S-adenosylmethionine_synthase	0.575006	0.0102991	0.0315121
P40417	ERKA_DROME	rl	Mitogen-activated_protein_kinase_ERK-A	-0.0346293	0.662655	0.756723
P40423	SQH_DROME	sqh	Myosin_regulatory_light_chain_sqh	0.34033	0.0508996	0.107717
P40796	LA_DROME	La	La_protein_homolog	0.336699	0.0229861	0.057799
P40797	PNUT_DROME	pnut	Protein_peanut	0.547508	0.00126905	0.00662995
P40946	ARF3_DROME	Arf51F	ADP-ribosylation_factor_3	-0.156903	0.155652	0.254113
P41042	RS4_DROME	RpS4	40S_ribosomal_protein_S4	-0.230363	0.0542019	0.112618
P41044	CAB32_DROME	Cbp53E	Calbindin-32	-0.234697	0.492938	0.608183
P41093	RL18A_DROME	RpL18A	60S_ribosomal_protein_L18a	-0.196534	0.090094	0.166043
P41094	RS18_DROME	RpS18	40S_ribosomal_protein_S18	-0.00744542	0.957913	0.974629
P41374	IF2A_DROME	eIF-2alpha	Eukaryotic_translation_initiation_factor_2_subunit_1	-0.198477	0.0782318	0.149072
P41375	IF2B_DROME	eIF-2beta	Eukaryotic_translation_initiation_factor_2_subunit_2	-0.121421	0.283966	0.401194
P41572	6PGD_DROME	Pgd	6-phosphogluconate_dehydrogenase,_decarboxylating	-1.28867	1.54706e-05	0.000286806
P41900	T2FB_DROME	TfIIFbeta	General_transcription_factor_IIF_subunit_2	-0.00267884	0.977191	0.985627
P42207	SEPT1_DROME	42614	Septin-1	0.58766	0.00244713	0.010535
P42787-3	CBPD_DROME	svr	Isoform_3_of_Carboxypeptidase_D	-0.558246	0.00410558	0.0157094
P42787-5	CBPD_DROME	svr	Isoform_5_of_Carboxypeptidase_D	-1.14118	2.04421e-05	0.0003412
P43332	SNRPA_DROME	snf	U1_small_nuclear_ribonucleoprotein_A	-0.241842	0.0673865	0.133287
P45437	COPB_DROME	betaCop	Coatomer_subunit_beta	-0.196163	0.0827015	0.155664
P45594	CADF_DROME	tsr	Cofilin/actin-depolymerizing_factor_homolog	0.413813	0.00395717	0.0152577
P45888	ARP2_DROME	Arp2	Actin-related_protein_2	0.169077	0.0467217	0.100441
P45889	ACTZ_DROME	Arp1	Actin-related_protein_1	-0.123701	0.0782447	0.149072
P45891	ACTY_DROME	Arp53D	Actin-like_protein_53D	1.11629	2.76123e-05	0.000427624
P45975	SUV39_DROME	Su(var)3-9	Histone-lysine_N-methyltransferase_Su(var)3-9	0.204125	0.0420092	0.0925676
P46222	RL11_DROME	RpL11	60S_ribosomal_protein_L11	-0.317705	0.0178068	0.0470279
P46223	RL7A_DROME	RpL7A	60S_ribosomal_protein_L7a	-0.140868	0.225384	0.339201
P46415	ADHX_DROME	Fdh	Alcohol_dehydrogenase_class-3	0.37788	0.0238104	0.0595735
P47948	TNNC2_DROME	TpnC47D	Troponin_C,_isoform_2	0.596691	0.23094	0.345721
P47949	TNNC3_DROME	TpnC73F	Troponin_C,_isoform_3	1.0349	0.0176285	0.0466872
P48159	RL23_DROME	RpL23	60S_ribosomal_protein_L23	-0.411755	0.00188934	0.00884626
P48375	FKB12_DROME	FK506-bp2	12_kDa_FK506-binding_protein	-0.327458	0.021118	0.0540103
P48461	PP11_DROME	Pp1alpha-96A	Serine/threonine-protein_phosphatase_alpha-1_isoform	-0.373673	0.0213595	0.0544722
P48555	RALA_DROME	Rala	Ras-related_protein_Ral-a	0.817372	1.99201e-05	0.000337813
P48588	RS25_DROME	RpS25	40S_ribosomal_protein_S25	-0.383864	0.0108111	0.032602
P48591	RIR1_DROME	RnrL	Ribonucleoside-diphosphate_reductase_large_subunit	0.668085	0.000131378	0.00126932
P48596	GCH1_DROME	Pu	GTP_cyclohydrolase_1	0.300053	0.253736	0.368536
P48601	PRS4_DROME	Rpt2	26S_protease_regulatory_subunit_4	-0.316775	0.00232432	0.0101571
P48604	GRPE_DROME	Roe1	GrpE_protein_homolog,_mitochondrial	-0.296086	0.0446562	0.0968291
P48607-5	SPZ_DROME	spz	Isoform_8.29_of_Protein_spaetzle	0.424127	0.0189455	0.0494195
P48609	CDK5_DROME	Cdk5	Cyclin-dependent_kinase_5_homolog	-0.177524	0.038205	0.0861498
P48610-2	KARG_DROME	Argk	Isoform_A_of_Arginine_kinase	0.135061	0.274162	0.390296
P48611	PTPS_DROME	pr	6-pyruvoyl_tetrahydrobiopterin_synthase	-0.285693	0.0582136	0.119276
P48612	PELO_DROME	pelo	Protein_pelota	0.0442366	0.613774	0.716617
P49028	MGN_DROME	mago	Protein_mago_nashi	-0.998511	0.100191	0.179382
P49455	TPM4_DROME	Tm1	Tropomyosin-1,_isoforms_33/34	1.51247	0.000344573	0.00251985
P49455-2	TPM4_DROME	Tm1	Isoform_34_of_Tropomyosin-1,_isoforms_33/34	1.27054	0.222372	0.335294
P49630	RL36_DROME	RpL36	60S_ribosomal_protein_L36	-0.447717	0.00380575	0.0148448
P49657	MNB_DROME	mnb	Serine/threonine-protein_kinase_minibrain	-0.0916204	0.575944	0.68122
P49735	MCM2_DROME	Mcm2	DNA_replication_licensing_factor_Mcm2	0.185184	0.342799	0.46259
P49846	TAF5_DROME	Taf5	Transcription_initiation_factor_TFIID_subunit_5	-0.276767	0.0151567	0.0417473
P49847	TAF6_DROME	Taf6	Transcription_initiation_factor_TFIID_subunit_6	-0.0391028	0.86342	0.912265
P49906	TAF11_DROME	Taf11	Transcription_initiation_factor_TFIID_subunit_11	-0.313317	0.0956563	0.17327
P49963	SRP19_DROME	Srp19	Signal_recognition_particle_19_kDa_protein	-0.467956	0.00600178	0.0209105
P50245	SAHH2_DROME	Ahcy89E	Putative_adenosylhomocysteinase_2	0.433816	0.00952539	0.0297805
P50882	RL9_DROME	RpL9	60S_ribosomal_protein_L9	-0.244951	0.025723	0.0635787
P50887	RL22_DROME	RpL22	60S_ribosomal_protein_L22	0.172239	0.244463	0.358427
P51406	BYS_DROME	bys	Bystin	-0.302868	0.0421493	0.0926713
P51592	HYD_DROME	hyd	E3_ubiquitin-protein_ligase_hyd	-0.0403813	0.690048	0.780108
P52029	G6PI_DROME	Pgi	Glucose-6-phosphate_isomerase	-0.909372	0.00011298	0.00112399
P52034	K6PF_DROME	Pfk	6-phosphofructokinase	0.19285	0.151684	0.248959
P52304	POLO_DROME	polo	Serine/threonine-protein_kinase_polo	0.725735	0.0133967	0.0380131
P52485	UBCD2_DROME	UbcD2	Ubiquitin-conjugating_enzyme_E2-24_kDa	0.409374	0.00307297	0.0126235
P52486	UBCD4_DROME	UbcD4	Ubiquitin-conjugating_enzyme_E2-22_kDa	0.0037953	0.969548	0.981465
P52656	T2AG_DROME	TfIIA-S	Transcription_initiation_factor_IIA_subunit_2	0.241045	0.0807703	0.152955
P53034	RFC2_DROME	RfC4	Replication_factor_C_subunit_2	0.0669331	0.645041	0.742766
P53624	MA121_DROME	alpha-Man-I	Mannosyl-oligosaccharide_alpha-1,2-mannosidase_isoform_A	0.283213	0.0144426	0.0401548
P53777	MLP1_DROME	Mlp60A	Muscle_LIM_protein_1	-0.0100014	0.98286	0.988963
P53997	SET_DROME	Set	Protein_SET	0.0802468	0.556295	0.666069
P54351	NSF2_DROME	Nsf2	Vesicle-fusing_ATPase_2	0.247817	0.0350201	0.0805591
P54352-2	EAS_DROME	eas	Isoform_A_of_Ethanolamine_kinase	1.21918	5.58908e-06	0.000142536
P54353	DOD_DROME	dod	Putative_peptidyl-prolyl_cis-trans_isomerase_dodo	0.0481463	0.513938	0.627314
P54358	DPOD1_DROME	DNApol-delta	DNA_polymerase_delta_catalytic_subunit	0.431049	0.00560943	0.0198324
P54359	SEPT2_DROME	42615	Septin-2	0.302968	0.0355336	0.0813519
P54361	OAZ_DROME	Oda	Ornithine_decarboxylase_antizyme	-0.343959	0.0651784	0.130098
P54362	AP3D_DROME	g	AP-3_complex_subunit_delta	-0.259371	0.00897846	0.0284951
P54385	DHE3_DROME	Gdh	Glutamate_dehydrogenase,_mitochondrial	1.64947	1.64977e-05	0.000293428
P54397	FKB39_DROME	FK506-bp1	39_kDa_FK506-binding_nuclear_protein	0.203289	0.0342905	0.0792071
P54398	FBP2_DROME	Fbp2	Fat_body_protein_2	-1.81413	3.39872e-06	9.70181e-05
P54399	PDI_DROME	Pdi	Protein_disulfide-isomerase	-0.385994	0.0390087	0.0872961
P54611	VATE_DROME	Vha26	V-type_proton_ATPase_subunit_E	0.451305	0.00516745	0.018615
P54622	SSBP_DROME	mtSSB	Single-stranded_DNA-binding_protein,_mitochondrial	0.465868	0.000204695	0.00176094
P55162	HEM_DROME	Hem	Membrane-associated_protein_Hem	0.0925553	0.34236	0.462374
P55824	FAF_DROME	faf	Probable_ubiquitin_carboxyl-terminal_hydrolase_FAF	0.00730228	0.924574	0.952052
P55828	RS20_DROME	RpS20	40S_ribosomal_protein_S20	0.0590919	0.666621	0.760469
P55830	RS3A_DROME	RpS3A	40S_ribosomal_protein_S3a	-0.19516	0.0576143	0.11829
P55841	RL14_DROME	RpL14	60S_ribosomal_protein_L14	-0.427811	0.00175672	0.00840397
P55935	RS9_DROME	RpS9	40S_ribosomal_protein_S9	-0.186823	0.195486	0.303218
P56079	CDSA_DROME	CdsA	Phosphatidate_cytidylyltransferase,_photoreceptor-specific	-0.454548	0.00130634	0.00675905
P56175	RCL1_DROME	Rtc1	Probable_RNA_3'-terminal_phosphate_cyclase-like_protein	0.449867	0.000612182	0.00392296
P56538	IF6_DROME	eIF6	Eukaryotic_translation_initiation_factor_6	0.35314	0.00945579	0.0296368
P61851	SODC_DROME	Sod	Superoxide_dismutase_[Cu-Zn]	-0.0154738	0.87459	0.91962
P61855	AKH_DROME	Akh	Adipokinetic_hormone	0.0332756	0.946236	0.967221
P61857	TBB2_DROME	betaTub85D	Tubulin_beta-2_chain	-0.527407	0.0149039	0.0412547
P62152	CALM_DROME	Cam	Calmodulin	-0.483132	0.0416117	0.0919336
P80455	RS12_DROME	RpS12	40S_ribosomal_protein_S12	-0.299144	0.00909824	0.0288207
P81900	KAPR2_DROME	Pka-R2	cAMP-dependent_protein_kinase_type_II_regulatory_subunit	0.232213	0.0202981	0.0522427
P81928	140U_DROME	140up	RPII140-upstream_gene_protein	-0.0451806	0.706565	0.793111
P82147	L2EFL_DROME	l(2)efl	Protein_lethal(2)essential_for_life	1.43412	0.00886375	0.0282202
P82712	CCD1P_DROME	Cyp12d1-p	Probable_cytochrome_P450_12d1_proximal,_mitochondrial	0.99368	0.00389039	0.015058
P82713	CP392_DROME	Cyp309a2	Probable_cytochrome_P450_309a2	1.99601	9.72624e-08	6.60333e-06
P82804	WIBG_DROME	wibg	Partner_of_Y14_and_mago	-0.819211	0.00574613	0.0201451
P82890	PPAC1_DROME	primo-1	Low_molecular_weight_phosphotyrosine_protein_phosphatase_1	-0.19119	0.136387	0.229243
P83094	STIM_DROME	Stim	Stromal_interaction_molecule_homolog	0.261469	0.0309422	0.0731336
P83098	STLK_DROME	Stlk	Putative_serine/threonine-protein_kinase_STE20-like	-0.00667056	0.971873	0.982172
P83100	MK14C_DROME	p38c	Putative_mitogen-activated_protein_kinase_14C	-0.826582	0.00384488	0.0149394
P83102	DYRK3_DROME	Dyrk3	Putative_dual_specificity_tyrosine-phosphorylation-regulated_kinase_3_homolog	0.0539477	0.659929	0.755063
P83967	ACT6_DROME	Act88F	Actin,_indirect_flight_muscle	0.957868	0.181983	0.287059
P84029	CYC2_DROME	Cyt-c-p	Cytochrome_c-2	-0.0753947	0.641358	0.740222
P84040	H4_DROME	His4	Histone_H4	-0.52068	0.0247411	0.0615647
P84051	H2A_DROME	His2A	Histone_H2A	-0.330697	0.489305	0.604591
P84345	ATP8_DROME	mt:ATPase8	ATP_synthase_protein_8	-0.580281	0.00179749	0.00854362
P91634	P91634_DROME	Pi3K92E	PI-3_kinase	-0.705573	9.35836e-06	0.000199222
P91660	L259_DROME	l(2)03659	Probable_multidrug_resistance-associated_protein_lethal(2)03659	-0.150306	0.30953	0.428987
P91875	RPA1_DROME	RpI1	DNA-directed_RNA_polymerase_I_subunit_RPA1	0.0162817	0.871569	0.917018
P91926	AP2A_DROME	AP-2alpha	AP-2_complex_subunit_alpha	0.011712	0.901252	0.935515
P91927	A60DA_DROME	Letm1	LETM1_and_EF-hand_domain-containing_protein_anon-60Da,_mitochondrial	0.24485	0.128603	0.219091
P91928	IMMT_DROME	CG6455	Putative_mitochondrial_inner_membrane_protein	0.138983	0.27519	0.391327
P91931	DCAM_DROME	SamDC	S-adenosylmethionine_decarboxylase_proenzyme	-0.068404	0.655801	0.751367
P91938	TRXR1_DROME	Trxr-1	Thioredoxin_reductase_1,_mitochondrial	0.487723	0.000132742	0.00127758
P92177	1433E_DROME	14-3-3epsilon	14-3-3_protein_epsilon	-0.139893	0.202918	0.312239
P92201	LCP8_DROME	Lcp65Ag1	Larval_cuticle_protein_8	-0.372708	0.673586	0.766151
P92204	NELFE_DROME	Nelf-E	Negative_elongation_factor_E	-1.1411	0.0016885	0.00814892
Q00174	LAMA_DROME	LanA	Laminin_subunit_alpha	0.592237	4.21534e-05	0.000581809
Q00449	MDR49_DROME	Mdr49	Multidrug_resistance_protein_homolog_49	1.35189	1.60125e-06	5.53497e-05
Q00637	SODM_DROME	Sod2	Superoxide_dismutase_[Mn],_mitochondrial	0.0468305	0.641335	0.740222
Q00748	MDR65_DROME	Mdr65	Multidrug_resistance_protein_homolog_65	-0.556643	0.0352474	0.0808968
Q01637	UMPS_DROME	r-l	Uridine_5'-monophosphate_synthase	0.209149	0.268686	0.384691
Q01989	MYS9_DROME	jar	Myosin_heavy_chain_95F	0.181096	0.250423	0.364992
Q02645-2	HTS_DROME	hts	Isoform_B_of_Protein_hu-li_tai_shao	-0.0989811	0.375413	0.495165
Q02645-3	HTS_DROME	hts	Isoform_C_of_Protein_hu-li_tai_shao	-0.710109	0.000793633	0.00469084
Q02910	CPN_DROME	Cpn	Calphotin	-1.06506	0.0376172	0.08513
Q03042	KGP1_DROME	Pkg21D	cGMP-dependent_protein_kinase,_isozyme_1	1.3311	8.12477e-10	1.79081e-07
Q03043	KGP24_DROME	for	cGMP-dependent_protein_kinase,_isozyme_2_forms_cD4/T1/T3A/T3B	-0.798572	4.20696e-07	2.1057e-05
Q03334	RS13_DROME	RpS13	40S_ribosomal_protein_S13	-0.358607	0.00245611	0.0105556
Q03427	LAMC_DROME	LamC	Lamin-C	0.988809	7.61938e-07	3.29998e-05
Q04047	NONA_DROME	nonA	Protein_no-on-transient_A	0.16709	0.159911	0.259327
Q04164	SAS_DROME	sas	Putative_epidermal_cell_surface_receptor	-0.0897287	0.757218	0.834793
Q04448	MTDC_DROME	Nmdmc	Bifunctional_methylenetetrahydrofolate_dehydrogenase/cyclohydrolase,_mitochondrial	0.457446	0.000706545	0.00430533
Q04688	ELG_DROME	Ets97D	DNA-binding_protein_Ets97D	-0.161077	0.237199	0.351427
Q04691	FBP1_DROME	Fbp1	Fat-body_protein_1	-0.601621	0.132294	0.223261
Q05344	SSRP1_DROME	Ssrp	FACT_complex_subunit_Ssrp1	0.285125	0.0537266	0.111815
Q05913	T2FA_DROME	TfIIFalpha	General_transcription_factor_IIF_subunit_1	0.204437	0.0471377	0.101119
Q059A4	Q059A4_DROME	CG4627	CG4627	-0.461329	0.00704957	0.0235956
Q06559	RS3_DROME	RpS3	40S_ribosomal_protein_S3	-0.302504	0.0261917	0.0645669
Q06943	HMGZ_DROME	HmgZ	High_mobility_group_protein_Z	-0.869359	0.0546829	0.113196
Q07171	GELS_DROME	Gel	Gelsolin	-0.369153	0.0160718	0.0436106
Q07886	DDX49_DROME	Dbp45A	Probable_ATP-dependent_RNA_helicase_Dbp45A	0.81096	0.0207638	0.0533319
Q08012	DRK_DROME	drk	Protein_enhancer_of_sevenless_2B	-0.388574	0.0396939	0.0883964
Q08473	SQD_DROME	sqd	RNA-binding_protein_squid	-0.184156	0.0694172	0.136248
Q09332	UGGG_DROME	Ugt	UDP-glucose:glycoprotein_glucosyltransferase	-0.0298169	0.753771	0.832316
Q0E8C8	Q0E8C8_DROME	Spn77Ba	FI21492p1	-0.927616	0.000350893	0.00255491
Q0E8E8	Q0E8E8_DROME	Mpcp	MIP08013p1	0.144656	0.438729	0.555348
Q0E8F0	Q0E8F0_DROME	caps	Capricious,_isoform_D	-0.564217	0.201718	0.311229
Q0E8F2	Q0E8F2_DROME	CG32103-RB	CG32103,_isoform_B	0.172856	0.0589591	0.120411
Q0E8G6	Q0E8G6_DROME	CG3689	CG3689,_isoform_C	-0.0703291	0.514388	0.627558
Q0E8H7	Q0E8H7_DROME	SP1173	FI19426p1	-0.671814	1.71507e-05	0.000299184
Q0E8H9	Q0E8H9_DROME	Hexo1	Beta-hexosaminidase	0.366608	0.0106142	0.0321626
Q0E8J0	Q0E8J0_DROME	MEP-1	MEP-1,_isoform_A	-0.163273	0.359007	0.478726
Q0E8K5	Q0E8K5_DROME	mri	AT10158p	-0.328678	0.00386731	0.0149918
Q0E8P1	Q0E8P1_DROME	CG17549	CG17549,_isoform_B	0.0967026	0.545732	0.656236
Q0E8Q7	Q0E8Q7_DROME	CG31731	CG31731,_isoform_B	-0.156028	0.151051	0.248082
Q0E8R3	Q0E8R3_DROME	bru-2	Bruno-2,_isoform_E	0.336471	0.0412793	0.0914002
Q0E8R4	Q0E8R4_DROME	Mt2	Methyltransferase_2,_isoform_C	0.0741394	0.521916	0.634431
Q0E8U4	Q0E8U4_DROME	CG17224-RB	CG17224,_isoform_A	0.889803	5.103e-06	0.000132837
Q0E8V7	Q0E8V7_DROME	Tim13	CG34132	-0.178708	0.410446	0.528935
Q0E8X6	Q0E8X6_DROME	eIF2B-delta	eIF2B-delta,_isoform_B	-0.180963	0.0432566	0.0944874
Q0E8X7	Q0E8X7_DROME	CG30415	CG30415,_isoform_A	-0.00704133	0.952902	0.971465
Q0E8X8	Q0E8X8_DROME	CG13551	CG13551,_isoform_A	-0.511058	0.364884	0.484071
Q0E8X9	Q0E8X9_DROME	yip3	FI08136p	-0.836056	0.000278538	0.00215953
Q0E908	Q0E908_DROME	Hil	Hillarin,_isoform_A	0.447442	0.0306548	0.0726482
Q0E910	Q0E910_DROME	CG8920	CG8920,_isoform_B	-0.399798	0.00363288	0.0143038
Q0E931	Q0E931_DROME	Dgp-1	Dgp-1,_isoform_A	-0.215496	0.252848	0.367673
Q0E965	Q0E965_DROME	SRPK	SRPK,_isoform_A	-0.206436	0.033073	0.076961
Q0E980	Q0E980_DROME	CG8547	CG8547,_isoform_C	-0.17937	0.215312	0.326608
Q0E981	Q0E981_DROME	CG8485	CG8485,_isoform_A	-0.0866839	0.397439	0.516753
Q0E993	Q0E993_DROME	Aats-val	Valyl-tRNA_synthetase,_isoform_A	0.040231	0.774156	0.84737
Q0E9A5	Q0E9A5_DROME	muskelin	FI21269p1	0.0956038	0.462661	0.578679
Q0E9B5	Q0E9B5_DROME	CG8841	CG8841,_isoform_A	0.177878	0.159581	0.258959
Q0E9B6	RS11_DROME	RpS11	40S_ribosomal_protein_S11	-0.258199	0.279698	0.396584
Q0E9C3	Q0E9C3_DROME	Sod3	Superoxide_dismutase_[Cu-Zn]	-0.21029	0.204548	0.314362
Q0E9E2	Q0E9E2_DROME	CG1516	Pyruvate_carboxylase	-0.652892	0.00154131	0.00757683
Q0E9F9	Q0E9F9_DROME	CG2915-RB	CG2915,_isoform_A	0.338785	0.0471829	0.101129
Q0E9G3	KTU_DROME	Nop17l	Protein_kintoun	-0.515804	0.00493815	0.0180038
Q0E9G4	Q0E9G4_DROME	Drat	CG1600,_isoform_A	-0.115023	0.491806	0.606935
Q0E9Q5	Q0E9Q5_DROME	p120ctn	Adherens_junction_protein_p120,_isoform_B	0.0894167	0.474788	0.590576
Q0KHQ1	Q0KHQ1_DROME	CG33714	CG33714,_isoform_A	0.45678	0.0121681	0.0353981
Q0KHR3	Q0KHR3_DROME	baz	Bazooka,_isoform_B	0.309149	0.116047	0.202437
Q0KHR5	Q0KHR5_DROME	RhoGAP15B	RhoGAP15B,_isoform_B	-0.19028	0.163121	0.263427
Q0KHR7	Q0KHR7_DROME	42617	Septin_4,_isoform_A	0.898193	8.94105e-05	0.000955741
Q0KHS0	Q0KHS0_DROME	kat80	Katanin_p80_WD40_repeat-containing_subunit_B1	-0.212547	0.278867	0.395659
Q0KHS6	Q0KHS6_DROME	Lsd-2	Lipid_storage_droplets_surface-binding_protein	-0.716006	0.00226496	0.0100083
Q0KHU2	Q0KHU2_DROME	Imp	IGF-II_mRNA-binding_protein,_isoform_K	0.119745	0.330787	0.45135
Q0KHU5	PCAT1_DROME	CG32699	1-acylglycerophosphocholine_O-acyltransferase_1	0.187676	0.342783	0.46259
Q0KHX7	Q0KHX7_DROME	CG13366-RB	CG13366,_isoform_B	0.359211	0.0272505	0.0663929
Q0KHY3	MESH_DROME	mesh	Protein_mesh	0.991051	0.220915	0.333396
Q0KHZ4	Q0KHZ4_DROME	CG34133	CG34133,_isoform_B	0.0507451	0.671728	0.764312
Q0KHZ6	Q0KHZ6_DROME	CG7834	CG7834,_isoform_A	-0.796836	0.000884984	0.00507552
Q0KHZ9	Q0KHZ9_DROME	Cnx99A	Calnexin_99A,_isoform_C	0.119947	0.359641	0.478758
Q0KI00	Q0KI00_DROME	SP1029	FI20034p1	-0.289646	0.190867	0.297338
Q0KI15	Q0KI15_DROME	CG34150	CG34150	-0.121601	0.412191	0.530413
Q0KI39	Q0KI39_DROME	CG17271-RB	CG17271,_isoform_B	-0.830646	0.0252303	0.062627
Q0KI50	DMDD_DROME	Dys	Dystrophin,_isoform_D	0.282766	0.0433353	0.0946183
Q0KI58	Q0KI58_DROME	PP2A-B'	PP2A-B',_isoform_D	-0.084903	0.330733	0.45135
Q0KI66	Q0KI66_DROME	Mhcl	Myosin_heavy_chain-like,_isoform_F	0.0298194	0.826912	0.886746
Q0KI81	Q0KI81_DROME	CG14713	CG42327	-0.508437	0.000112514	0.00112399
Q0KI87	Q0KI87_DROME	CG11872	CG11870,_isoform_A	0.455769	0.0014308	0.00722445
Q0KI92	Q0KI92_DROME	CG12814	CG12814,_isoform_B	-0.678849	0.00690804	0.0232458
Q0KI96	Q0KI96_DROME	ps	Pasilla,_isoform_K	0.0334635	0.812146	0.875397
Q0KI97	Q0KI97_DROME	CG34117	CG34117	0.251173	0.114717	0.200606
Q0KI98	Q0KI98_DROME	Aats-trp	FI06027p	0.27998	0.0479325	0.102274
Q0KIA8	Q0KIA8_DROME	CG1041	CG1041,_isoform_B	0.432735	0.0241767	0.0603397
Q0KIE6	Q0KIE6_DROME	CG12582	CG12582,_isoform_B	0.911171	3.01449e-05	0.000457546
Q0KIE7	Q0KIE7_DROME	Ank	Ankyrin,_isoform_B	0.115903	0.26432	0.380063
Q0KIF4	Q0KIF4_DROME	Eph	Eph_receptor_tyrosine_kinase,_isoform_A	-0.385119	0.046438	0.0999622
Q10714	ACE_DROME	Ance	Angiotensin-converting_enzyme	0.646549	0.00207166	0.00947043
Q1LZ08	WDR48_DROME	CG9062	WD_repeat-containing_protein_48_homolog	0.0294081	0.777489	0.848416
Q1RL12	Q1RL12_DROME	nrv2	IP16413p	-0.172678	0.398087	0.517462
Q1WWH6	Q1WWH6_DROME	stumps	RE42507p	-0.332899	0.0391877	0.0875797
Q23976	KU70_DROME	Irbp	ATP-dependent_DNA_helicase_2_subunit_1	1.70975	1.47152e-09	2.84343e-07
Q23979	MY61F_DROME	Myo61F	Myosin-IB	0.911405	7.68259e-05	0.000868891
Q23983	SNAP_DROME	Snap	Soluble_NSF_attachment_protein	-0.0777334	0.509466	0.62337
Q23997	C5210_DROME	CG5210	Chitinase-like_protein_CG5210	-0.458086	0.0534087	0.111384
Q24007	Q24007_DROME	Gp150	Gp150_protein	-0.439202	0.0793713	0.150817
Q24020	FLII_DROME	fliI	Protein_flightless-1	0.0745441	0.65874	0.754047
Q24050	Q24050_DROME	anon-i1	Anon-i1_protein	0.11452	0.28263	0.399868
Q24090	Q24090_DROME	Snr1	GH08712p	0.048804	0.756638	0.834361
Q24114	DALY_DROME	dally	Division_abnormally_delayed_protein	0.203175	0.289623	0.407126
Q24133	DNAJ1_DROME	DnaJ-1	DnaJ_protein_homolog_1	-0.528636	0.000155612	0.00143448
Q24134	NELFD_DROME	TH1	Negative_elongation_factor_D	-0.214706	0.0703287	0.137644
Q24145	SHARK_DROME	shark	Tyrosine-protein_kinase_shark	-0.0222271	0.772582	0.846555
Q24151-2	STAT_DROME	Stat92E	Isoform_C_of_Signal_transducer_and_transcription_activator	-0.357044	0.0166906	0.0447697
Q24157	BRN_DROME	brn	Beta-1,3-galactosyltransferase_brn	-0.233273	0.344594	0.464334
Q24179	SLY1_DROME	Slh	Protein_sly1_homolog	-0.334245	0.00244177	0.010521
Q24185	HOOK_DROME	hk	Protein_hook	0.0924506	0.343117	0.462895
Q24186	RS5A_DROME	RpS5a	40S_ribosomal_protein_S5a	-0.06372	0.569299	0.67696
Q24192	RHOL_DROME	RhoL	Ras-like_GTP-binding_protein_RhoL	0.70737	4.29756e-05	0.000586336
Q24208	IF2G_DROME	eIF-2gamma	Eukaryotic_translation_initiation_factor_2_subunit_3	-0.181398	0.0743108	0.143399
Q24210	CSKP_DROME	CASK	Peripheral_plasma_membrane_protein_CASK	0.4556	0.0292852	0.0699946
Q24212	STNB_DROME	stnB	Protein_stoned-B	-0.532777	0.178693	0.283024
Q24214	CANB2_DROME	CanB2	Calcineurin_subunit_B_type_2	-0.201726	0.281042	0.398182
Q24216	Q24216_DROME	Cdk7	Cyclin-dependent_kinase_7	0.070249	0.525617	0.637697
Q24238	APH4_DROME	Aph-4	Alkaline_phosphatase_4	1.62681	6.16392e-05	0.00074085
Q24247	ITA1_DROME	mew	Integrin_alpha-PS1	0.191674	0.0667233	0.132445
Q24251	ATP5H_DROME	ATPsyn-d	ATP_synthase_subunit_d,_mitochondrial	-0.284401	0.0944715	0.171841
Q24253	Q24253_DROME	AP-1-2beta	Beta_adaptin	-0.0770337	0.358093	0.478156
Q24276	CDC37_DROME	Cdc37	Hsp90_co-chaperone_Cdc37	-0.371188	0.00157862	0.00773003
Q24297	RUXF_DROME	SmF	Small_nuclear_ribonucleoprotein_F	0.68593	2.78754e-06	8.59179e-05
Q24298	CADE_DROME	shg	DE-cadherin	-0.211071	0.379764	0.49972
Q24307	IAP2_DROME	Iap2	Apoptosis_2_inhibitor	-0.190842	0.152766	0.250243
Q24311	CUL1_DROME	lin19	Cullin_homolog_1	-0.199347	0.015523	0.0425464
Q24314	VPS18_DROME	dor	Vacuolar_protein_sorting-associated_protein_18_homolog	-0.0620643	0.464348	0.58032
Q24318	TFDP_DROME	Dp	Transcription_factor_Dp	-2.99019	1.14712e-10	5.76315e-08
Q24319	OST48_DROME	Ost48	Dolichyl-diphosphooligosaccharide--protein_glycosyltransferase_48_kDa_subunit	0.0592809	0.540077	0.650995
Q24323	SEM2A_DROME	Sema-2a	Semaphorin-2A	-0.00483922	0.986748	0.991909
Q24324	DSOR1_DROME	Dsor1	Dual_specificity_mitogen-activated_protein_kinase_kinase_dSOR1	0.00575597	0.941881	0.963553
Q24368	ISWI_DROME	Iswi	Chromatin-remodeling_complex_ATPase_chain_Iswi	-0.00529423	0.980071	0.987145
Q24372	LACH_DROME	Lac	Lachesin	0.21307	0.141314	0.235789
Q24388	LSP2_DROME	Lsp2	Larval_serum_protein_2	-2.16269	3.32622e-06	9.65949e-05
Q24407	ATP5J_DROME	ATPsyn-Cf6	ATP_synthase-coupling_factor_6,_mitochondrial	-0.686646	0.00231685	0.0101571
Q24439	ATPO_DROME	Oscp	ATP_synthase_subunit_O,_mitochondrial	-0.254049	0.0676341	0.133567
Q24451	MAN2_DROME	alpha-Man-II	Alpha-mannosidase_2	-0.0341714	0.717887	0.802908
Q24468	Q24468_DROME	put	Punt	0.140797	0.15153	0.248786
Q24472	RBF_DROME	Rbf	Retinoblastoma_family_protein	0.173748	0.0862815	0.160905
Q24478	CP190_DROME	Cp190	Centrosome-associated_zinc_finger_protein_CP190	-0.672911	0.00283854	0.0118642
Q24491	RX21_DROME	Rsf1	RNA-binding_protein_Rsf1	-0.454445	0.0112639	0.0335934
Q24492	RFA1_DROME	RpA-70	Replication_protein_A_70_kDa_DNA-binding_subunit	0.712179	7.34262e-05	0.000840304
Q24498-3	RY44_DROME	Rya-r44F	Isoform_B_of_Ryanodine_receptor_44F	1.05155	0.00221807	0.0098616
Q24522	BUN1_DROME	bun	Protein_bunched,_class_1/class_3/D/E_isoforms	0.05174	0.575479	0.68122
Q24523	BUN2_DROME	bun	Protein_bunched,_class_2/F/G_isoform	-1.02768	0.000262962	0.00209387
Q24547	STX1A_DROME	Syx1A	Syntaxin-1A	0.296916	0.118192	0.205324
Q24560	TBB1_DROME	betaTub56D	Tubulin_beta-1_chain	0.0219247	0.827267	0.886875
Q24564	MERH_DROME	Mer	Moesin/ezrin/radixin_homolog_2	-0.0895612	0.373029	0.492794
Q24574	UBPE_DROME	Ubp64E	Ubiquitin_carboxyl-terminal_hydrolase_64E	0.00157785	0.987892	0.992039
Q24583	VATF1_DROME	Vha14-1	V-type_proton_ATPase_subunit_F_1	0.609958	0.00209636	0.00954862
Q24592	JAK_DROME	hop	Tyrosine-protein_kinase_hopscotch	-0.276496	0.0171224	0.0457327
Q26365	ADT_DROME	sesB	ADP,ATP_carrier_protein	0.344106	0.0603469	0.1223
Q26454	MCM4_DROME	dpa	DNA_replication_licensing_factor_MCM4	0.153798	0.467234	0.582911
Q26459	Q26459_DROME	Msr-110	LD44960p	1.43125	0.0111836	0.0334244
Q27237	TID_DROME	l(2)tid	Protein_tumorous_imaginal_discs,_mitochondrial	-0.152661	0.360195	0.479369
Q27268	DX39B_DROME	Hel25E	ATP-dependent_RNA_helicase_WM6	-0.332878	0.00300273	0.0123958
Q27272	TAF9_DROME	e(y)1	Transcription_initiation_factor_TFIID_subunit_9	-0.314482	0.03966	0.08836
Q27294	CAZ_DROME	caz	RNA-binding_protein_cabeza	-0.968035	1.0841e-06	4.20777e-05
Q27333	NT56_DROME	l(2)not	Lethal(2)neighbour_of_tid_protein	-0.159457	0.226264	0.340073
Q27411	Q27411_DROME	Rlb1	Rlb1	0.31399	0.0127205	0.0366654
Q27415	NLP_DROME	Nlp	Nucleoplasmin-like_protein	0.825984	1.57389e-05	0.000287535
Q27421	OSP_DROME	osp	Protein_outspread	0.0345332	0.841562	0.896904
Q27580	SAHH_DROME	Ahcy13	Adenosylhomocysteinase	0.608707	0.0113885	0.0338554
Q27589	CP4D2_DROME	Cyp4d2	Cytochrome_P450_4d2	-0.203488	0.388022	0.507529
Q27591	ITBN_DROME	Itgbetanu	Integrin_beta-nu	-0.939538	0.00688462	0.0231825
Q27593	CP6A8_DROME	Cyp6a8	Cytochrome_P450_6a8	3.97306	1.20901e-11	1.21481e-08
Q27594	CP6A9_DROME	Cyp6a9	Cytochrome_P450_6a9	-1.12345	0.00187235	0.00878307
Q27601	PUR1_DROME	Prat	Amidophosphoribosyltransferase	-0.562765	3.55602e-05	0.00052043
Q27606	CP4E2_DROME	Cyp4e2	Cytochrome_P450_4e2	-0.930764	0.000105987	0.00108227
Q27607	DPOG1_DROME	tam	DNA_polymerase_subunit_gamma-1,_mitochondrial	0.215033	0.0628265	0.126408
Q27869	PIMT_DROME	Pcmt	Protein-L-isoaspartate(D-aspartate)_O-methyltransferase	0.273519	0.0147194	0.0408339
Q29QE1	Q29QE1_DROME	RhoGAP1A	GH15984p	-0.618573	8.67102e-05	0.000936843
Q29QQ9	Q29QQ9_DROME	Rrp42	IP10364p	-0.203341	0.0177573	0.0469293
Q29R02	Q29R02_DROME	CG4360	CG4360,_isoform_B	-0.589419	0.00290742	0.0120918
Q29R16	Q29R16_DROME	ome	LP13067p	0.714799	1.6855e-05	0.00029505
Q2M1E6	Q2M1E6_DROME	Cdep	Cdep,_isoform_E	0.18944	0.0192857	0.0501248
Q2PDM3	Q2PDM3_DROME	CG33978	CG33978,_isoform_C	-0.360663	0.0102465	0.0313702
Q2PDU0	Q2PDU0_DROME	NimB3	Nimrod_B3	-2.06527	1.62946e-05	0.000292371
Q2PDX2	Q2PDX2_DROME	CG34001	CG34001,_isoform_B	0.0156503	0.902465	0.936386
Q2PDY3	Q2PDY3_DROME	CG7255	CG7255,_isoform_F	-0.881382	0.0128647	0.0369566
Q2PE14	ZCHC8_DROME	CG4622	Zinc_finger_CCHC_domain-containing_protein_8_homolog	-0.289514	0.00129312	0.00672255
Q2PE16	Q2PE16_DROME	CG13516-RA	CG13516	0.708978	5.35934e-05	0.000668122
Q32KD2	SETB1_DROME	egg	Histone-lysine_N-methyltransferase_eggless	-0.192531	0.415518	0.533086
Q32KD3	Q32KD3_DROME	CG2747	CG2747,_isoform_D	-0.147713	0.044484	0.0965389
Q32KD4	Q32KD4_DROME	AGO1	Argonaute-1,_isoform_A	-0.325915	0.00143292	0.00722791
Q3KN54	Q3KN54_DROME	CG14435	CG14435,_isoform_B	-0.590669	0.000269317	0.00211745
Q3YMU0	Q3YMU0_DROME	ERp60	ERp60_(Fragment)	0.342387	0.0262816	0.064675
Q45VV3	YORKI_DROME	yki	Protein_yorkie	-0.18203	0.241813	0.355641
Q494G8	Q494G8_DROME	fbl6	Fbl6,_isoform_A	-0.301504	0.0960782	0.17382
Q4AB31	Q4AB31_DROME	gish	Gilgamesh,_isoform_G	-0.0558955	0.508331	0.622284
Q4LDP6	Q4LDP6_DROME	mus201	Mutagen-sensitive_201,_isoform_A	0.282502	0.0795851	0.151167
Q4QPU3	Q4QPU3_DROME	CG15908	CG15908,_isoform_A	0.0529855	0.766662	0.842825
Q4QQ12	Q4QQ12_DROME	CG11110	CG11110	0.422632	0.00491971	0.0179589
Q4U2G8	Q4U2G8_DROME	CG11961	CG11961,_isoform_A	0.805736	0.000137152	0.0013001
Q4V3Z5	Q4V3Z5_DROME	CG11788	CG11788	0.0839327	0.399388	0.518616
Q4V429	Q4V429_DROME	CG13018	CG13018	-0.899896	0.0191083	0.0497411
Q4V4D1	Q4V4D1_DROME	CG18765	CG18765	0.611618	0.448806	0.565932
Q4V4P1	Q4V4P1_DROME	CG12868	CG12868	1.49029	5.23211e-08	3.98275e-06
Q4V5H1	Q4V5H1_DROME	CG17266	Peptidyl-prolyl_cis-trans_isomerase	0.0870027	0.679544	0.771184
Q4V604	Q4V604_DROME	CG32202	CG32202	-0.282695	0.129075	0.219672
Q4V6J1	Q4V6J1_DROME	GstE10	Glutathione_S_transferase_E10	0.37651	0.297757	0.415998
Q4V6M1	Q4V6M1_DROME	Apf	Diadenosine_tetraphosphate_hydrolase	-0.701329	0.16163	0.261439
Q4V6M7	UFSP1_DROME	UFSP1	Probable_Ufm1-specific_protease_1	-0.883231	0.000615622	0.00392498
Q4V6X9	Q4V6X9_DROME	CG17385	CG17385	-0.336201	0.0325256	0.0759334
Q4Z8K6	RBP9X_DROME	RanBPM	Ran-binding_proteins_9/10_homolog	-0.23328	0.00320344	0.0130106
Q500Y7	Q500Y7_DROME	CG14482	CG14482	-0.0693181	0.724559	0.808391
Q58CJ5	Q58CJ5_DROME	sals	CG31374,_isoform_D	0.866367	0.000166834	0.00151023
Q59DP9	Q59DP9_DROME	PMCA	Plasma_membrane_calcium_ATPase,_isoform_J	0.265375	0.15774	0.256663
Q59DT9	Q59DT9_DROME	Nf1	Neurofibromin_1,_isoform_D	-0.207044	0.161917	0.261818
Q59E01	Q59E01_DROME	CG9795-RD	CG9795,_isoform_D	-0.253952	0.103382	0.18392
Q59E06	Q59E06_DROME	CG1161	CG1161,_isoform_B	0.460584	0.00126088	0.00660545
Q59E09	Q59E09_DROME	AcCoAS	Acetyl_coenzyme_A_synthase,_isoform_D	-0.565484	0.175712	0.279739
Q59E30	Q59E30_DROME	fax	Failed_axon_connections,_isoform_C	0.0794845	0.777093	0.848352
Q59E33	Q59E33_DROME	scaf6	LD21442p	0.0673406	0.481452	0.597151
Q59E58	Q59E58_DROME	zip	Zipper,_isoform_C	0.407064	0.0307583	0.0728226
Q5BI50	Q5BI50_DROME	Cul-4	Cullin-4,_isoform_A	-0.165533	0.29469	0.412516
Q5BIA9	Q5BIA9_DROME	CG8613	CG8613	-0.509361	0.00011266	0.00112399
Q5BIE4	Q5BIE4_DROME	CG15096	CG15096,_isoform_A	1.19058	0.000770257	0.00459048
Q5BIL9	Q5BIL9_DROME	CG18278	CG18278	-0.21769	0.102259	0.182246
Q5EAK6	ATM_DROME	tefu	Serine/threonine-protein_kinase_ATM	1.39022	4.75966e-08	3.70881e-06
Q5KTT4	Q5KTT4_DROME	NAT1	NAT1,_isoform_C_(Fragment)	-0.175865	0.0443717	0.0963369
Q5LJP6	Q5LJP6_DROME	CG17698	CG17698,_isoform_D	0.0319816	0.758499	0.835862
Q5LJZ2	Q5LJZ2_DROME	Set1	Set1,_isoform_A	-0.134464	0.257068	0.372287
Q5U0V7	Q5U0V7_DROME	synj	GH06496p	0.192227	0.145829	0.241797
Q5U0X8	Q5U0X8_DROME	CG12325	CG12325	0.45361	0.000569371	0.00369576
Q5U0Y0	Q5U0Y0_DROME	Sin3A	LD13852p	-0.307848	0.036719	0.0833979
Q5U117	Q5U117_DROME	Egm	Enigma	0.327745	0.0290201	0.0694601
Q5U124	Q5U124_DROME	Mal-A5	CG30359,_isoform_A	-0.950252	2.30035e-06	7.31452e-05
Q5U127	Q5U127_DROME	Dcp2	Decapping_protein_2,_isoform_E	-0.225733	0.091026	0.167627
Q5U156	Q5U156_DROME	row	RE01954p	-0.521188	0.00231927	0.0101571
Q5U191	Q5U191_DROME	CG1882	CG1882,_isoform_A	0.355032	0.106819	0.18896
Q5U1B0	Q5U1B0_DROME	CG10131	CG10131	0.119706	0.335301	0.455531
Q6AWN0	MTND_DROME	CG32068	1,2-dihydroxy-3-keto-5-methylthiopentene_dioxygenase	-0.467706	0.00912591	0.0288901
Q6IDE2	Q6IDE2_DROME	CG3907	CG3907,_isoform_A	-0.643452	0.00740315	0.0244855
Q6IDF5	Q6IDF5_DROME	CG12859	CG12859	-0.0559887	0.725405	0.808796
Q6IGN6	Q6IGN6_DROME	CG34228	CG34228	0.275342	0.0211822	0.0541025
Q6IGW6	Q6IGW6_DROME	CG34200	CG34200	-0.034647	0.801989	0.867612
Q6II06	Q6II06_DROME	CG33635	CG33635	-0.261383	0.078415	0.149226
Q6IIA4	Q6IIA4_DROME	CG34015-RA	CG34015	0.0149058	0.932038	0.95797
Q6IJR5	Q6IJR5_DROME	CG34284	CG34284	2.13996	0.00153598	0.00757287
Q6IL18	Q6IL18_DROME	CG43085	CG43085,_isoform_A	-1.87068	1.12864e-05	0.000228641
Q6IM52	Q6IM52_DROME	CG34199	CG34199	1.42554	0.223777	0.33731
Q6NL44	Q6NL44_DROME	CG31188	CG33722,_isoform_B	-0.0199088	0.84856	0.90128
Q6NLA3	Q6NLA3_DROME	Vha100-1	RE25460p	-0.150008	0.270372	0.386404
Q6NN40	NTM1_DROME	Ntmt	Alpha_N-terminal_protein_methyltransferase_1	-0.132499	0.307749	0.4269
Q6NNB2	Q6NNB2_DROME	CG8777	CG8777	-0.675831	5.13562e-05	0.000646762
Q6NND8	Q6NND8_DROME	sm	RE74969p	-0.525511	0.00148227	0.00738456
Q6NNF2	Q6NNF2_DROME	Pde8	Phosphodiesterase_8,_isoform_A	0.213964	0.0502418	0.106459
Q6NP69	Q6NP69_DROME	gfzf	GST-containing_FLYWCH_zinc-finger_protein	-0.347738	0.0141756	0.0396097
Q6NP72	Q6NP72_DROME	CG13220	CG13220	0.113645	0.254477	0.369187
Q6NP91	Q6NP91_DROME	CG11210	CG11210	0.154852	0.109612	0.193157
Q6NPA6	Q6NPA6_DROME	par-1	Par-1,_isoform_L	-0.245491	0.167436	0.269582
Q6NPB2	Q6NPB2_DROME	CG8317	CG8317	-4.06457	2.93678e-07	1.61926e-05
Q6NQY9	Q6NQY9_DROME	CG9143	CG9143	0.230808	0.0180223	0.0474799
Q6NR30	Q6NR30_DROME	BEST:LD13441	CG14478,_isoform_A	-0.0955558	0.605068	0.708862
Q6NR46	Q6NR46_DROME	Spt-I	RE58623p	0.750566	0.000391559	0.00279431
Q6WV17	GALT5_DROME	pgant5	Polypeptide_N-acetylgalactosaminyltransferase_5	0.00686504	0.964682	0.978865
Q6WV19	GALT2_DROME	pgant2	Polypeptide_N-acetylgalactosaminyltransferase_2	0.368052	0.293296	0.411253
Q6XPX3	Q6XPX3_DROME	sPLA2	FI07253p	-1.36264	1.38483e-05	0.000263537
Q709R6	Q709R6_DROME	bocksbeutel	Bocksbeutel_alpha	-0.104305	0.46404	0.580079
Q70PP2	SMG1_DROME	nonC	Serine/threonine-protein_kinase_Smg1	0.100614	0.177272	0.281349
Q70PY2	PGSB1_DROME	PGRP-SB1	Peptidoglycan-recognition_protein_SB1	0.0339851	0.834975	0.891825
Q76NQ0	Q76NQ0_DROME	CG33303	CG33303,_isoform_A	0.083216	0.429992	0.547877
Q76NR6	Q76NR6_DROME	regucalcin	Regucalcin,_isoform_D	-0.518755	0.00966279	0.0300594
Q76NS2	Q76NS2_DROME	CG10353	Anoctamin	0.476828	0.000776698	0.00461245
Q7JMZ0	Q7JMZ0_DROME	Ric	RIC_(Ras_which_interacts_with_Calmodulin)	-0.784238	0.00606204	0.0210475
Q7JN06	Q7JN06_DROME	BEAF-32	Boundary_element_associated_factor	-0.344743	0.0830829	0.156157
Q7JNE1	Q7JNE1_DROME	prod	Non-histone_chromosomal_protein_Prod	-0.522261	0.00494582	0.0180187
Q7JQ32	Q7JQ32_DROME	Gyc76C	Guanylate_cyclase	-0.0588051	0.516935	0.630036
Q7JQG5	Q7JQG5_DROME	ckn	CG12424,_isoform_A	0.778234	0.000871334	0.00501441
Q7JQH9	Q7JQH9_DROME	whd	LD31742p	-0.545503	0.000403408	0.00284253
Q7JQI1	Q7JQI1_DROME	CG8830	CG8830,_isoform_A	-0.515116	0.000192451	0.00167109
Q7JQL5	Q7JQL5_DROME	Atg9	Autophagy-specific_gene_9	-0.208566	0.0922163	0.169086
Q7JQN4	Q7JQN4_DROME	Rs1	LD15481p	0.176098	0.0815905	0.15416
Q7JQR3	Q7JQR3_DROME	CG4670	Sulfhydryl_oxidase	-0.272396	0.0395914	0.0882463
Q7JQT9	Q7JQT9_DROME	CG1671	CG1671	0.542365	7.70804e-05	0.000868891
Q7JQW6	LIAS_DROME	Las	Lipoyl_synthase,_mitochondrial	0.693073	0.00345456	0.0137863
Q7JQX9	Q7JQX9_DROME	SNF4Agamma	FI14001p1	0.0745916	0.432909	0.549291
Q7JR49	Q7JR49_DROME	VhaAC45	CG8029,_isoform_A	0.400955	0.0727304	0.140808
Q7JR58	Q7JR58_DROME	CG6543	CG6543,_isoform_A	-0.68521	0.00567321	0.0199644
Q7JR71	Q7JR71_DROME	Sod3	Superoxide_dismutase_[Cu-Zn]	-0.640672	0.0767237	0.147122
Q7JR91	Q7JR91_DROME	Nmda1	GH12715p	-0.743291	0.000175262	0.00157235
Q7JR99	Q7JR99_DROME	CG30094-RA	CG30094	-0.921429	0.00219818	0.00984636
Q7JRC3	Q7JRC3_DROME	Jheh1	Juvenile_hormone_epoxide_hydrolase_1	-0.22501	0.256139	0.371276
Q7JRC9	Q7JRC9_DROME	CG30493	CG30496	0.417918	0.000989578	0.00553411
Q7JRE1	Q7JRE1_DROME	CG9171	CG9171,_isoform_C	0.55585	0.000523009	0.00347107
Q7JRE4	Q7JRE4_DROME	MAN1	MAN1,_isoform_A	-0.095372	0.275831	0.391904
Q7JRF9	Q7JRF9_DROME	CG8708	CG8708,_isoform_B	1.11339	0.00441578	0.0165312
Q7JRJ9	Q7JRJ9_DROME	Incenp	Inner_centromere_protein	-0.186606	0.649103	0.745713
Q7JRM5	Q7JRM5_DROME	CG11127	CG11127	0.130685	0.43229	0.549103
Q7JUN3	Q7JUN3_DROME	CG2316	CG2316,_isoform_A	0.155062	0.198651	0.307368
Q7JUP3	Q7JUP3_DROME	casp	Caspar,_isoform_A	0.00489435	0.946627	0.967235
Q7JUR6	GDAP2_DROME	CG18812	Protein_GDAP2_homolog	0.483771	0.182327	0.287421
Q7JUS1	Q7JUS1_DROME	CG30491	AT09608p	-0.0451636	0.699223	0.787468
Q7JUS9	Q7JUS9_DROME	CG9090-RA	CG9090	0.676555	0.0560598	0.115523
Q7JUV6	Q7JUV6_DROME	tn	Another_B-box_affiliate,_isoform_A	0.801604	0.00555917	0.0197071
Q7JUX9	MRRP1_DROME	trmt10c	Mitochondrial_ribonuclease_P_protein_1_homolog	0.420921	0.000240724	0.00197568
Q7JV09	Q7JV09_DROME	jp	GH28348p	1.34496	4.34757e-08	3.49578e-06
Q7JV69	Q7JV69_DROME	Spn55B	SD11922p	0.123495	0.531648	0.643305
Q7JV70	Q7JV70_DROME	Arc2	Arc2	2.02458	4.35585e-05	0.000588274
Q7JVG2	Q7JVG2_DROME	Aps	Aps,_isoform_A	-0.111716	0.248043	0.362364
Q7JVG6	Q7JVG6_DROME	CG1550	CG1550	-0.0472992	0.702518	0.789409
Q7JVH6	Q7JVH6_DROME	CG9436	CG9436	-0.433258	0.0132595	0.0377855
Q7JVI3	EIF3M_DROME	Tango7	Eukaryotic_translation_initiation_factor_3_subunit_M	-0.29332	0.00296517	0.0122702
Q7JVI6	Q7JVI6_DROME	GstE13	CG11784	0.448309	0.00968073	0.0300908
Q7JVK1	Q7JVK1_DROME	mRpL18	HL07956p	-0.132301	0.401321	0.520051
Q7JVK6	Q7JVK6_DROME	trsn	GM27569p	-0.374089	0.0022142	0.00985307
Q7JVK8	Q7JVK8_DROME	CG5323	CG5323	0.328051	0.0279896	0.0675082
Q7JVL3	Q7JVL3_DROME	Prp38	GM13395p	0.078489	0.57056	0.677819
Q7JVP2	Q7JVP2_DROME	Rcd-1	GH15157p	-0.116452	0.27119	0.387172
Q7JVY0	Q7JVY0_DROME	coro	Coronin	-0.270053	0.00360833	0.0142518
Q7JVZ8	Q7JVZ8_DROME	GstE11	CG5224	0.0750546	0.669633	0.76262
Q7JW03	Q7JW03_DROME	Ubc-E2H	CG2257	-0.545176	0.00606051	0.0210475
Q7JW07	Q7JW07_DROME	CG12935	CG12935	-0.133189	0.300949	0.419408
Q7JW12	TMX2_DROME	CG11007	Thioredoxin-related_transmembrane_protein_2_homolog	0.23273	0.0676627	0.133571
Q7JW27	WASH1_DROME	wash	WAS_protein_family_homolog_1	-0.335556	0.0065016	0.0222356
Q7JW61	Q7JW61_DROME	CG8494	Ubiquitin_carboxyl-terminal_hydrolase	-0.12209	0.3535	0.473469
Q7JW66	Q7JW66_DROME	CG12129	CG12129	-0.392906	0.0175028	0.0465014
Q7JW73	Q7JW73_DROME	CG8080	CG8080	-0.0293474	0.821365	0.881928
Q7JWD3	ASNA_DROME	CG1598	ATPase_ASNA1_homolog	-0.237795	0.0541433	0.112543
Q7JWD6	Q7JWD6_DROME	Elongin-C	Elongin_C,_isoform_A	-0.0272266	0.822388	0.882649
Q7JWF1	Q7JWF1_DROME	Etf-QO	CG12140	-0.271363	0.0851818	0.159215
Q7JWG9	RM52_DROME	mRpL52	39S_ribosomal_protein_L52,_mitochondrial	-0.759052	0.000541059	0.00357669
Q7JWH6	Q7JWH6_DROME	CG1888	CG1888	0.669165	0.000300512	0.00229798
Q7JWP5	Q7JWP5_DROME	Tsp42Eg	RE11685p	1.66494	2.92582e-06	8.96301e-05
Q7JWQ7	Q7JWQ7_DROME	Swim	CG3074,_isoform_A	-1.3669	9.52903e-06	0.000200418
Q7JWR4	Q7JWR4_DROME	CG13319	CG13319,_isoform_A	-0.216162	0.03392	0.0785318
Q7JWR9	ZC3HF_DROME	CG8635	Zinc_finger_CCCH_domain-containing_protein_15_homolog	-0.342077	0.00673494	0.0228008
Q7JWS8	Q7JWS8_DROME	Mtl	AT17867p	0.115237	0.361849	0.480807
Q7JWU9	Q7JWU9_DROME	CG14480	AT07420p	-0.287631	0.187516	0.293575
Q7JWV7	Q7JWV7_DROME	Tsp42Ed	SD10395p	0.884718	0.0165748	0.0445195
Q7JWW6	Q7JWW6_DROME	Ady43A	Ady43A	0.68555	0.00114075	0.00614271
Q7JWX3	Q7JWX3_DROME	nec	GH10112p	-0.737251	5.61268e-05	0.00069113
Q7JX87	Q7JX87_DROME	Prx2540-2	Peroxiredoxin_2540	0.00280669	0.992906	0.995085
Q7JX94	Q7JX94_DROME	CG30503	CG30503,_isoform_A	-0.971838	0.000137961	0.0013041
Q7JX95	Q7JX95_DROME	CG11123	CG11123	0.0584365	0.564022	0.672277
Q7JXA2	Q7JXA2_DROME	L	LOBE	-0.127063	0.268355	0.384326
Q7JXB5	Q7JXB5_DROME	CG10924	CG10924,_isoform_A	0.2622	0.299786	0.418135
Q7JXB9	Q7JXB9_DROME	EndoG	Endonuclease_G	0.0758818	0.637037	0.736451
Q7JXC4	Q7JXC4_DROME	P32	CG6459	0.208924	0.12257	0.211197
Q7JXF5	Q7JXF5_DROME	Nup62	GH12838p	0.0151614	0.867668	0.914826
Q7JXF7	Q7JXF7_DROME	sel	CG12918	-0.669364	0.00055616	0.00364256
Q7JXU4	Q7JXU4_DROME	Ns2	Nuclear_GTP_binding_protein	-0.0909166	0.467231	0.582911
Q7JXZ2	Q7JXZ2_DROME	Eip55E	Eip55E	0.217364	0.454731	0.571427
Q7JY94	Q7JY94_DROME	Atg7	Autophagy-specific_gene_7,_isoform_A	-0.682124	9.99333e-05	0.00104277
Q7JY99	Q7JY99_DROME	CG8298	CG8298,_isoform_A	0.733532	1.31162e-05	0.000256946
Q7JYH3	Q7JYH3_DROME	CG9350	CG9350	0.149508	0.414183	0.53178
Q7JYK2	Q7JYK2_DROME	CG1941	CG1941	1.0311	0.000898694	0.0051249
Q7JYV7	KAD6_DROME	Ak6	Adenylate_kinase_isoenzyme_6_homolog	-0.44424	0.0220563	0.0559934
Q7JYW9	Q7JYW9_DROME	Hex-C	Hexokinase_C	-0.709739	0.0394611	0.0880732
Q7JYX2	Q7JYX2_DROME	CG2065	CG2065	-2.32009	1.19727e-09	2.50629e-07
Q7JYX5	Q7JYX5_DROME	Vamp7	CG1599	-0.467013	0.0141625	0.0395952
Q7JYZ0	Q7JYZ0_DROME	CG6426	CG6426	0.788471	0.000520838	0.00346123
Q7JZ25	Q7JZ25_DROME	ClC-b	CG8594	-0.12258	0.262925	0.378274
Q7JZ37	Q7JZ37_DROME	CG12134	CG12134,_isoform_A	-0.00399457	0.972201	0.982172
Q7JZ53	Q7JZ53_DROME	mRpS4	CG4866,_isoform_A	0.113138	0.564022	0.672277
Q7JZ56	Q7JZ56_DROME	S2P	Metallo_endopeptidase	0.460775	0.000917675	0.00521539
Q7JZB1	Q7JZB1_DROME	CG12338	CG12338	-0.759404	3.89074e-05	0.000549075
Q7JZD3	Q7JZD3_DROME	Eb1	Eb1,_isoform_A	-0.322117	0.0119584	0.0350314
Q7JZE1	Q7JZE1_DROME	Pex11	CG8315	0.00701638	0.956815	0.974268
Q7JZE8	Q7JZE8_DROME	CG8323	CG8323	0.775389	2.71857e-05	0.000422852
Q7JZF5	Q7JZF5_DROME	Rpb5	RE34924p	0.0430739	0.667242	0.760721
Q7JZK1	Q7JZK1_DROME	CG7712	CG7712	0.0280358	0.870432	0.916298
Q7JZM8	RM41_DROME	mRpL41	39S_ribosomal_protein_L41,_mitochondrial	-0.322887	0.0361424	0.0824388
Q7JZR5	Q7JZR5_DROME	CG6796	CG6796	0.227955	0.0132019	0.0376622
Q7JZW0	Q7JZW0_DROME	Cpr51A	Cuticular_protein_51A	-0.292371	0.41335	0.531013
Q7JZZ3	Q7JZZ3_DROME	CG13321	CG13321	0.967955	0.202623	0.312072
Q7K012	Q7K012_DROME	Bap55	Brahma_associated_protein_55kD	0.07511	0.574691	0.681115
Q7K025	Q7K025_DROME	CG11892	CG11892,_isoform_A	2.39835	0.00368251	0.0144878
Q7K084	Q7K084_DROME	Obp44a	Obp44a	-1.29362	0.000316429	0.00238598
Q7K0A0	Q7K0A0_DROME	mRpL42	Mitochondrial_ribosomal_protein_L42	-0.148345	0.25791	0.37309
Q7K0B6	Q7K0B6_DROME	GstT1	CG30000	-0.0381078	0.769798	0.845163
Q7K0D3	Q7K0D3_DROME	CG12909	CG12909	0.0720805	0.562907	0.671585
Q7K0D8	Q7K0D8_DROME	Nup50	CG2158	-0.30406	0.0776879	0.148343
Q7K0E3	MOB4_DROME	Mob4	MOB_kinase_activator-like_4	-0.0276173	0.775293	0.847528
Q7K0E6	Q7K0E6_DROME	Aats-asp	Aspartyl-tRNA_synthetase	-0.525362	0.00995768	0.0306917
Q7K0F7	Q7K0F7_DROME	CG11200	CG11200,_isoform_A	0.00499709	0.979179	0.986971
Q7K0H4	Q7K0H4_DROME	stj	SD07723p	0.51583	0.00498533	0.0181101
Q7K0I7	Q7K0I7_DROME	CG8034	CG8034,_isoform_B	-0.32607	0.109408	0.193
Q7K0K1	Q7K0K1_DROME	CG2063	CG2063	-1.05587	0.000480845	0.00327784
Q7K0L5	Q7K0L5_DROME	veil	LP01562p	0.344304	0.0344964	0.0796094
Q7K0L7	Q7K0L7_DROME	Tpc1	CG6608,_isoform_A	0.738649	2.03065e-06	6.62466e-05
Q7K0L8	Q7K0L8_DROME	FLASH	CG4616,_isoform_A	0.171416	0.238937	0.353169
Q7K0P0	Q7K0P0_DROME	JhI-26	Juvenile_hormone-inducible_protein_26	0.512085	0.00300898	0.0124012
Q7K0Q2	Q7K0Q2_DROME	Ranbp11	LD41918p	0.24822	0.0273282	0.0664232
Q7K0S1	Q7K0S1_DROME	CG14764	CG14764	0.0762511	0.436253	0.55291
Q7K0S5	Q7K0S5_DROME	Gint3	GDI_interacting_protein_3,_isoform_B	0.196126	0.027455	0.0665704
Q7K0V7	Q7K0V7_DROME	CG8272	CG8272	-0.265769	0.106172	0.188084
Q7K0W1	Q7K0W1_DROME	CG8531	CG8531	-0.111488	0.318498	0.438513
Q7K0X3	Q7K0X3_DROME	CG2469	CG2469,_isoform_A	0.0637437	0.510921	0.624389
Q7K0X9	Q7K0X9_DROME	Syx7	LD23667p	0.0369365	0.641345	0.740222
Q7K0Y1	BOP1_DROME	CG5033	Ribosome_biogenesis_protein_BOP1_homolog	0.297881	0.00284493	0.0118811
Q7K110	Q7K110_DROME	OstDelta	CG6370	0.35116	0.00944965	0.0296368
Q7K112	Q7K112_DROME	twin	LD18435p	-0.11309	0.169232	0.271723
Q7K126	Q7K126_DROME	Not3	LD13864p	-0.851142	2.14578e-05	0.000354618
Q7K127	Q7K127_DROME	CG7997	CG7997,_isoform_A	0.292081	0.387639	0.507319
Q7K130	Q7K130_DROME	CG12042	CG12042	-0.23268	0.00679432	0.02294
Q7K137	Q7K137_DROME	Lnk	LD10453p	-0.254707	0.0748807	0.144138
Q7K148	Q7K148_DROME	Prosbeta5	Proteasome_subunit_beta_type	-0.252745	0.00969085	0.0300908
Q7K159	Q7K159_DROME	mip40	LD06557p	-0.608944	0.000243034	0.00198537
Q7K161	Q7K161_DROME	CG6805	CG6805	-0.0630588	0.607725	0.710545
Q7K172	Q7K172_DROME	ste24a	LD04933p	0.00159556	0.986776	0.991909
Q7K180	Q7K180_DROME	Map60	LD02709p	-0.386911	0.150212	0.246965
Q7K1C0	Q7K1C0_DROME	CG3436	CG11455,_isoform_A	0.0247766	0.876356	0.920706
Q7K1C3	Q7K1C3_DROME	CG6984	CG6984	0.629504	0.00351428	0.0139903
Q7K1C5	Q7K1C5_DROME	CG6406	CG6406,_isoform_A	0.297606	0.00485424	0.0177753
Q7K1H0	Q7K1H0_DROME	CG6491	CG32066,_isoform_B	0.687165	3.49154e-06	9.91046e-05
Q7K1H5	Q7K1H5_DROME	CG11808	CG11808	0.0484574	0.576136	0.68122
Q7K1I4	Q7K1I4_DROME	Tsp42Ea	GH05668p	0.966768	0.00610103	0.0211682
Q7K1L4	Q7K1L4_DROME	CG8468	CG8468,_isoform_A	-0.0989457	0.795765	0.863155
Q7K1M4	Q7K1M4_DROME	CG1902	CG1902,_isoform_A	0.317956	0.00963514	0.0300105
Q7K1Q7	Q7K1Q7_DROME	RpLP0-like	CG1381	0.184313	0.122465	0.211189
Q7K1R6	Q7K1R6_DROME	CG10916	CG10916	-0.145027	0.156003	0.254519
Q7K1S1	Q7K1S1_DROME	CG8067	CG8067	-0.0316049	0.773557	0.847253
Q7K1U0	Q7K1U0_DROME	Arc1	Arc1	2.56008	1.86258e-08	2.03426e-06
Q7K1V1	Q7K1V1_DROME	CG8441	CG8441	-0.611273	0.0105702	0.0321192
Q7K1W4	Q7K1W4_DROME	Jheh3	Juvenile_hormone_epoxide_hydrolase_3	-0.323333	0.0725064	0.140537
Q7K1W5	Q7K1W5_DROME	CG8187	CG8187	0.0829688	0.306162	0.425493
Q7K1Y4	CIAO1_DROME	Ciao1	Probable_cytosolic_iron-sulfur_protein_assembly_protein_Ciao1	0.00684619	0.957717	0.974629
Q7K1Z5	UFC1_DROME	CG8386	Ubiquitin-fold_modifier-conjugating_enzyme_1	-0.301485	0.0106683	0.0322847
Q7K204	Q7K204_DROME	barc	Barricade,_isoform_A	-0.141638	0.211826	0.322587
Q7K209	Q7K209_DROME	CG8525	CG8525	-0.473638	0.0232471	0.0583675
Q7K231	Q7K231_DROME	CG7747	CG7747	-1.23237	0.00204322	0.00938311
Q7K274	Q7K274_DROME	l(2)k09913	LD15586p	0.024634	0.890152	0.929786
Q7K284	CLP1_DROME	cbc	Protein_CLP1_homolog	-0.0549894	0.725061	0.808592
Q7K2B0	RRP8_DROME	CG7137	Ribosomal_RNA-processing_protein_8	0.0279871	0.798762	0.865053
Q7K2D2	DCTN2_DROME	Dmn	Probable_dynactin_subunit_2	0.0187261	0.778619	0.849464
Q7K2E1	Q7K2E1_DROME	CG8839	CG8839,_isoform_A	-0.0495608	0.7328	0.815232
Q7K2G1-2	ADRM1_DROME	Rpn13	Isoform_2_of_Proteasomal_ubiquitin_receptor_ADRM1_homolog	-0.541199	0.00151963	0.00752922
Q7K2L1	Q7K2L1_DROME	lat	AT22044p1	0.100273	0.770473	0.845719
Q7K2L7	Q7K2L7_DROME	CG17765	CG17765	0.610712	0.134032	0.225814
Q7K2N0	Q7K2N0_DROME	CG8735	CG8735	-0.220292	0.0313754	0.0739352
Q7K2Q8	Q7K2Q8_DROME	CG10153	CG10153	-0.334614	0.0104609	0.0318384
Q7K2V9	Q7K2V9_DROME	CG16804	CG33671	0.333905	0.00470051	0.017389
Q7K2W3	Q7K2W3_DROME	CG8785	CG8785,_isoform_A	1.17702	0.0223661	0.0565798
Q7K2W6	Q7K2W6_DROME	proPO-A1	GH04080p	-0.403002	0.26564	0.381525
Q7K2X5	Q7K2X5_DROME	CG14762	CG14762	0.297461	0.335589	0.455692
Q7K2X8	Q7K2X8_DROME	Nup44A	Nup44A,_isoform_A	-0.0754464	0.283575	0.400867
Q7K332	Q7K332_DROME	CG3364	CG30159,_isoform_A	-0.000212006	0.998079	0.998676
Q7K3B7	Q7K3B7_DROME	CG11208	CG11208	0.640553	0.00404849	0.015562
Q7K3D4	Q7K3D4_DROME	CG5482	CG5482	0.0863345	0.541407	0.652355
Q7K3D8	Q7K3D8_DROME	DMAP1	DMAP1	0.00453302	0.978535	0.986784
Q7K3E2	Q7K3E2_DROME	CG5080	CG5080,_isoform_A	0.0651205	0.365728	0.484934
Q7K3H0	Q7K3H0_DROME	Pi3K68D	LD28067p	0.036089	0.736719	0.818305
Q7K3J0	Q7K3J0_DROME	CG8258	CG8258	0.204467	0.0388623	0.0871236
Q7K3M5	Q7K3M5_DROME	CG11107	CG11107	-0.0870987	0.324998	0.44594
Q7K3M6	Q7K3M6_DROME	CG8654-RA	CG8654	-1.57519	0.000741289	0.0044442
Q7K3N4	Q7K3N4_DROME	CG8888	CG8888	1.26438	0.00112129	0.006077
Q7K3P0	Q7K3P0_DROME	CG8257	CG8257	0.0331556	0.741087	0.822085
Q7K3U4	Q7K3U4_DROME	Fmo-2	Flavin-containing_monooxygenase_2	-0.0441452	0.868149	0.914826
Q7K3V6	Q7K3V6_DROME	CG12736	AT01345p	0.198128	0.144998	0.240736
Q7K3W2	Q7K3W2_DROME	CG8728-RA	CG8728	0.27309	0.0994457	0.178406
Q7K3W4	Q7K3W4_DROME	qsm	GH08941p	-0.0139848	0.938902	0.962073
Q7K3Z3	Q7K3Z3_DROME	p47	GH01724p	-0.136521	0.13172	0.222867
Q7K3Z8	Q7K3Z8_DROME	CG17292	CG17292,_isoform_A	-0.121941	0.290696	0.408252
Q7K483	Q7K483_DROME	CG7943	CG7943,_isoform_A	0.0262022	0.804673	0.869393
Q7K485	Q7K485_DROME	cathD	CathD	-0.253141	0.0434002	0.0947187
Q7K486	ARMC6_DROME	CG5721	Armadillo_repeat-containing_protein_6_homolog	0.0129312	0.905293	0.938739
Q7K4B2	Q7K4B2_DROME	CG7845	CG7845	0.657663	0.000112922	0.00112399
Q7K4B3	ELP2_DROME	Elp2	Probable_elongator_complex_protein_2	-0.31493	0.0101074	0.0310387
Q7K4C2	Q7K4C2_DROME	CG7737	CG7737	0.472702	0.00639397	0.0219872
Q7K4C7	Q7K4C7_DROME	Cct1	CTP:phosphocholine_cytidylyltransferase_1,_isoform_A	0.47257	0.0863499	0.160973
Q7K4G8	Q7K4G8_DROME	CG12391	CG12391	-0.327605	0.0961942	0.173876
Q7K4I5	Q7K4I5_DROME	CG8892-RB	AT08017p	-0.222859	0.0238493	0.0596409
Q7K4L8	Q7K4L8_DROME	CG7878	CG7878	-0.236143	0.0413286	0.0914663
Q7K4L9	Q7K4L9_DROME	CG8405	CG8405	-0.469429	6.94431e-05	0.000810793
Q7K4Q9	Q7K4Q9_DROME	Hmgs	HMG_coenzyme_A_synthase,_isoform_A	0.511017	0.0353885	0.0811094
Q7K4T8	Q7K4T8_DROME	CG8520	CG8520	0.749617	0.00217043	0.00977958
Q7K4V4	AKTP1_DROME	cbx	Protein_crossbronx	0.157984	0.249939	0.364709
Q7K4W1	CDKAL_DROME	CG6550	Threonylcarbamoyladenosine_tRNA_methylthiotransferase	-0.337875	0.0104132	0.0318224
Q7K4Y0	Q7K4Y0_DROME	desat1	Desat1,_isoform_A	-1.09521	0.00222314	0.00987536
Q7K511	Q7K511_DROME	EG:87B1.3	CG3835,_isoform_A	0.306543	0.208641	0.319511
Q7K519	Q7K519_DROME	RagC-D	GH16429p	-0.00837933	0.941713	0.963553
Q7K533	Q7K533_DROME	CG11395	CG11395	-2.03077	3.9688e-05	0.000556962
Q7K549	Q7K549_DROME	mlt	CG12214,_isoform_A	0.796344	0.000171266	0.00154478
Q7K550	EIF3J_DROME	Adam	Eukaryotic_translation_initiation_factor_3_subunit_J	-0.24162	0.0331197	0.0770341
Q7K561	Q7K561_DROME	CG8503	CG8503	-1.29342	0.00110748	0.00600862
Q7K566	Q7K566_DROME	Bmcp	Bmcp,_isoform_A	0.135653	0.176441	0.280608
Q7K569	Q7K569_DROME	Gpo-1	GH10595p	-0.243225	0.139658	0.233958
Q7K579	Q7K579_DROME	Dgkepsilon	Diacyl_glycerol_kinase_epsilon	-0.072946	0.428527	0.546426
Q7K581	Q7K581_DROME	CG8963	CG8963,_isoform_A	-0.216978	0.0463684	0.0998949
Q7K5J8	Q7K5J8_DROME	Cpr57A	Cuticular_protein_57A,_isoform_A	-1.03874	0.000373228	0.00269328
Q7K5K3	Q7K5K3_DROME	CG11876	CG11876,_isoform_A	-0.343337	0.0486887	0.103693
Q7K5M0	Q7K5M0_DROME	scaf	GH05918p	0.661231	0.00817932	0.0264945
Q7K5M2	Q7K5M2_DROME	CG10139	CG10139	-0.358481	0.0264103	0.0648195
Q7K5M6	Q7K5M6_DROME	Sip1	GH04176p	-1.03938	0.0131753	0.0376198
Q7K738	Q7K738_DROME	UbcD10	EG:52C10.4_protein	-0.324497	0.0183973	0.0482654
Q7K7A9	FEN1_DROME	Fen1	Flap_endonuclease_1	0.093545	0.455058	0.571552
Q7K7G0	Q7K7G0_DROME	deltaCOP	Delta-coatomer_protein,_isoform_B	-0.387843	0.00973462	0.0301772
Q7K7W5	Q7K7W5_DROME	adp	Adipose	-0.288153	0.0069292	0.0233014
Q7K860	Q7K860_DROME	TpnC4	FI07231p	0.91194	0.432505	0.549129
[truncated: 3,025 more rows]

## Sheet: Muscle
UniprotEntry	UniprotGeneName	GeneName	ProteinDescription	logFC	P.Value	adj.P.Val
A0AQH0	A0AQH0_DROME	Prosbeta1	Proteasome_subunit_beta_type	0.000615801	0.993624	0.995606
A0T1Z4	A0T1Z4_DROME	yrt	Yurt_gamma	-0.267739	0.0651307	0.109952
A1A708	Y4951_DROME	CG4951	Uncharacterized_protein_CG4951	0.860412	2.55742e-05	0.000149401
A1A714	A1A714_DROME	CG12004	CG12004,_isoform_C	0.417982	0.00424459	0.0105936
A1YK02	A1YK02_DROME	Nup75	Nup75	0.599516	2.47171e-06	2.41124e-05
A1Z6E6	A1Z6E6_DROME	d4	D4,_isoform_C	-0.258481	0.303855	0.393041
A1Z6F4	A1Z6F4_DROME	laccase2	CG42345,_isoform_E	0.0993446	0.755303	0.813718
A1Z6G4	A1Z6G4_DROME	CG17508-RA	CG17508	0.0436169	0.677607	0.750507
A1Z6G6	A1Z6G6_DROME	CG1344	CG1344	0.000305001	0.997001	0.998392
A1Z6H3	A1Z6H3_DROME	vlc	Vulcan,_isoform_D	0.323455	0.0333318	0.0619989
A1Z6H6	A1Z6H6_DROME	CG7791	CG7791	-0.0456008	0.617549	0.700037
A1Z6H7	A1Z6H7_DROME	Gp210	Gp210	0.554501	2.21042e-05	0.000132837
A1Z6I7	A1Z6I7_DROME	BubR1	Bub1-related_kinase	1.07088	3.25737e-05	0.000180829
A1Z6J2	A1Z6J2_DROME	SCAP	SCAP	0.382151	0.000997602	0.00310915
A1Z6J4	A1Z6J4_DROME	tbce	CG7861,_isoform_A	0.108027	0.425207	0.518631
A1Z6L1	TO402_DROME	tomboy40	Mitochondrial_import_receptor_subunit_TOM40_homolog_2	-0.347183	0.0346833	0.0642748
A1Z6L9	A1Z6L9_DROME	Trap1	FI21274p1	0.0499846	0.661732	0.738295
A1Z6M0	A1Z6M0_DROME	Bap170	Brahma_associated_protein_170kD	0.0431926	0.76761	0.82368
A1Z6M6	A1Z6M6_DROME	Dpit47	DNA_polymerase_interacting_tpr_containing_protein_of_47kD	1.01859	1.10085e-07	2.16041e-06
A1Z6N5	A1Z6N5_DROME	CG3270-RA	CG3270	1.09803	0.000680203	0.00226164
A1Z6P3	A1Z6P3_DROME	Eb1	Eb1,_isoform_F	-0.384384	0.00260335	0.00706084
A1Z6Q0	A1Z6Q0_DROME	koi	CG3287,_isoform_B	-0.216028	0.0489959	0.0863703
A1Z6Q1	A1Z6Q1_DROME	koi	Klaroid	0.234864	0.0703494	0.117459
A1Z6R8	A1Z6R8_DROME	CG3358	CG3358,_isoform_C	0.306805	0.0143315	0.0299631
A1Z6S6	A1Z6S6_DROME	vimar	RE54322p	-0.780492	0.000258484	0.00100668
A1Z6U3	A1Z6U3_DROME	Tsp42Ek	IP01824p	2.21854	2.59568e-06	2.51189e-05
A1Z6U7	A1Z6U7_DROME	Tsp42Ep	Tetraspanin_42Ep	2.38939	1.04201e-06	1.21746e-05
A1Z6V5	A1Z6V5_DROME	Spn43Ab	FI01422p	1.24885	3.78894e-05	0.000203155
A1Z6X0	A1Z6X0_DROME	CG12164	CG12164	0.352274	0.299154	0.38866
A1Z6X1	A1Z6X1_DROME	Dscam1	Down_syndrome_cell_adhesion_molecule,_isoform_D	0.233937	0.189516	0.267002
A1Z6X6	A1Z6X6_DROME	CG1707	CG1707	0.0304685	0.797807	0.847933
A1Z6Z3	A1Z6Z3_DROME	Aldh-III	Aldehyde_dehydrogenase	0.604871	0.00143253	0.00420387
A1Z6Z7	A1Z6Z7_DROME	CG1620	CG1620,_isoform_A	-0.223007	0.336834	0.427229
A1Z713	A1Z713_DROME	Vps13	Vacuolar_protein_sorting_13	0.368622	0.00107429	0.00329302
A1Z729	A1Z729_DROME	CG2064	CG2064	0.419274	0.00554904	0.0133262
A1Z734	A1Z734_DROME	CG1399	CG1399,_isoform_B	0.190348	0.0472875	0.0839203
A1Z743	A1Z743_DROME	CG30497	CG30497,_isoform_A	-0.370426	0.0178765	0.0365237
A1Z757	A1Z757_DROME	phr	Photorepair,_isoform_B	2.73786	5.8539e-14	2.941e-10
A1Z768	A1Z768_DROME	rnh1	Ribonuclease_H1,_isoform_B	0.495919	1.19103e-05	8.10802e-05
A1Z784	A1Z784_DROME	ACC	CG11198,_isoform_A	1.21423	0.000102556	0.000466703
A1Z7A8	A1Z7A8_DROME	coil	Coilin,_isoform_D	0.517633	5.93144e-05	0.000294753
A1Z7C4	A1Z7C4_DROME	LRP1	CG33087	0.307762	0.0178366	0.0364718
A1Z7F1	A1Z7F1_DROME	Mal-A6	CG30360	-0.262845	0.480948	0.572851
A1Z7F3	A1Z7F3_DROME	Mal-A8	CG8690	1.60869	0.00808957	0.0183734
A1Z7G2	A1Z7G2_DROME	CG14752-RA	CG14752	0.284958	0.507598	0.598633
A1Z7G7	LPHN_DROME	Cirl	Latrophilin_Cirl	0.140862	0.50625	0.597463
A1Z7H2	A1Z7H2_DROME	Acsl	Lethal_(2)_44DEa,_isoform_D	-0.603888	0.000733579	0.00240725
A1Z7H7	A1Z7H7_DROME	CG8586-RA	CG8586	0.459124	0.0358511	0.0661787
A1Z7J6	A1Z7J6_DROME	sec31	Sec31,_isoform_B	-0.0219837	0.776812	0.830539
A1Z7J7	A1Z7J7_DROME	sec31	Sec31,_isoform_A	0.0794636	0.514771	0.605244
A1Z7K2	A1Z7K2_DROME	CG30349-RA	CG30349	1.44025	1.03517e-09	6.50086e-08
A1Z7K6	A1Z7K6_DROME	CG8243-RA	CG8243	-0.24857	0.0970458	0.152731
A1Z7K8	A1Z7K8_DROME	CG8235	CG8235	0.0857987	0.459526	0.551783
A1Z7K9	A1Z7K9_DROME	CG8232	CG8232	0.133683	0.0739907	0.122199
A1Z7L1	A1Z7L1_DROME	FANCI	CG13745	3.07577	1.14646e-11	4.1129e-09
A1Z7M8	A1Z7M8_DROME	Ance-4	Ance-4	-0.148765	0.435075	0.528102
A1Z7P1	A1Z7P1_DROME	Pmm45A	Phosphomannomutase_45A,_isoform_A	0.160192	0.199535	0.278928
A1Z7P3	A1Z7P3_DROME	Phax	Phosphorylated_adaptor_for_RNA_export,_isoform_A	-0.413727	0.0105924	0.0230252
A1Z7P5	A1Z7P5_DROME	Su(var)2-10	Suppressor_of_variegation_2-10,_isoform_I	-0.0500694	0.626176	0.708219
A1Z7Q7	A1Z7Q7_DROME	Hydr1	Alpha/beta_hydrolase_1,_isoform_A	-0.569987	0.00623524	0.0146246
A1Z7Q8	A1Z7Q8_DROME	alc	Alicorn	0.0614878	0.758141	0.816135
A1Z7S0	A1Z7S0_DROME	Rme-8	Receptor_mediated_endocytosis_8	0.0298858	0.668221	0.743629
A1Z7S4	A1Z7S4_DROME	CG8026	CG8026,_isoform_A	0.0910865	0.565055	0.651716
A1Z7T0-2	PKN_DROME	Pkn	Isoform_2_of_Serine/threonine-protein_kinase_N	0.0932919	0.188137	0.265805
A1Z7V1	A1Z7V1_DROME	brp	Bruchpilot,_isoform_D	0.647818	0.0488381	0.0861828
A1Z7V9	A1Z7V9_DROME	CG1814-RA	CG1814,_isoform_A	-0.377624	0.00485286	0.0118757
A1Z7X7	A1Z7X7_DROME	GstT2	CG30005	-1.24558	1.82334e-07	3.19344e-06
A1Z7X8	A1Z7X8_DROME	CG12926	CG12926	0.697727	0.000139661	0.000602797
A1Z7Z4	A1Z7Z4_DROME	CG1648	CG1648,_isoform_B	-0.354504	0.145489	0.214603
A1Z803	A1Z803_DROME	CG1665-RA	CG1665	0.363928	0.00601483	0.0142339
A1Z813	A1Z813_DROME	sec24	Sec24	0.0592287	0.505789	0.597059
A1Z814	A1Z814_DROME	CG1513-RA	Oxysterol-binding_protein	-0.00196368	0.974467	0.982879
A1Z830	A1Z830_DROME	CG12128	CG12128,_isoform_A	1.12105	0.00128811	0.00383835
A1Z833	A1Z833_DROME	CG1407	Palmitoyltransferase	-0.0905624	0.511264	0.601825
A1Z843	A1Z843_DROME	CG1371	CG1371	-0.0405311	0.646608	0.726259
A1Z847	A1Z847_DROME	CG2269	CG2269,_isoform_B	0.71575	0.0190108	0.0383575
A1Z850	A1Z850_DROME	Ccs	Superoxide_dismutase_[Cu-Zn]	0.505619	0.00259001	0.00703743
A1Z866	A1Z866_DROME	CAP	CAP,_isoform_I	0.450267	0.00106885	0.00328034
A1Z869	A1Z869_DROME	CAP	CAP,_isoform_F	-0.357865	0.0396594	0.0721655
A1Z876	A1Z876_DROME	Ndg	Nidogen/entactin,_isoform_B	0.213944	0.0458081	0.0817258
A1Z893	A1Z893_DROME	CG12896-RA	CG12896	1.48626	0.000109927	0.00049487
A1Z8A4	A1Z8A4_DROME	psq	Pipsqueak,_isoform_A	-1.03827	0.0010624	0.00326653
A1Z8A7	A1Z8A7_DROME	CG11883	CG11883,_isoform_A	-0.237011	0.155866	0.227109
A1Z8B5	A1Z8B5_DROME	CG7220-RB	CG7220,_isoform_B	-0.125978	0.227041	0.310466
A1Z8D0	A1Z8D0_DROME	nclb	CG6751	0.973658	3.53281e-07	5.25113e-06
A1Z8D2	A1Z8D2_DROME	CG18003-RC	CG18003,_isoform_A	1.43087	1.75121e-05	0.000110807
A1Z8F4	A1Z8F4_DROME	shn	Schnurri,_isoform_D	0.000122949	0.99956	0.99956
A1Z8G7	A1Z8G7_DROME	Listericin	CG9080	-0.242828	0.505321	0.596788
A1Z8H4	A1Z8H4_DROME	Cpr47Ec	Cuticular_protein_47Ec	-0.337681	0.443649	0.535921
A1Z8I0	A1Z8I0_DROME	CG9067	CG9067	0.23498	0.0707689	0.118003
A1Z8J0	C19L1_DROME	CG7741	CWF19-like_protein_1_homolog	1.15675	7.07611e-08	1.55844e-06
A1Z8J8	A1Z8J8_DROME	CG30025	CG30025	-0.00479593	0.993233	0.995413
A1Z8L7	A1Z8L7_DROME	CG7763	CG7763	0.446516	0.0556737	0.0964832
A1Z8L8	A1Z8L8_DROME	CG7777	CG7777,_isoform_A	-1.02434	0.000293592	0.00111912
A1Z8M2	A1Z8M2_DROME	tou	Toutatis,_isoform_A	0.103171	0.669296	0.743822
A1Z8M8	A1Z8M8_DROME	CG9003	CG9003,_isoform_A	-0.0589763	0.585967	0.670134
A1Z8N1	TRE11_DROME	Tret1-1	Facilitated_trehalose_transporter_Tret1-1	0.53684	0.00197001	0.00555406
A1Z8P9	TPR_DROME	Mtor	Nucleoprotein_TPR	0.0425582	0.600443	0.683886
A1Z8Q0	A1Z8Q0_DROME	TwdlBeta	TwdlBeta	-0.0464913	0.866609	0.902574
A1Z8R2	A1Z8R2_DROME	CG8290	CG8290,_isoform_A	-0.0478686	0.625136	0.707202
A1Z8R6	A1Z8R6_DROME	CG33145	CG33145,_isoform_B	-0.364971	0.00290467	0.00774039
A1Z8R8	A1Z8R8_DROME	rho-7	Rhomboid-7	-0.136733	0.178295	0.254187
A1Z8S6	A1Z8S6_DROME	pds5	Pds5	-0.0620495	0.620156	0.702359
A1Z8U0	A1Z8U0_DROME	Prp8	Pre-mRNA_processing_factor_8	0.0269979	0.73095	0.794868
A1Z8U4	A1Z8U4_DROME	Cct5	T-complex_chaperonin_5,_isoform_B	-0.0353492	0.713735	0.781051
A1Z8U9	A1Z8U9_DROME	RpS11	Ribosomal_protein_S11,_isoform_B	-1.08243	3.03787e-07	4.78963e-06
A1Z8W8	A1Z8W8_DROME	garz	Gartenzwerg,_isoform_B	0.0494813	0.465261	0.55771
A1Z8Z3	A1Z8Z3_DROME	Cpr49Ag	Cuticular_protein_49Ag	-0.243338	0.562406	0.649098
A1Z904	A1Z904_DROME	Dyb	Dystrobrevin	0.648295	3.71177e-05	0.000200482
A1Z909	A1Z909_DROME	CG8545-RA	CG8545	1.10274	1.25796e-09	7.43528e-08
A1Z910	A1Z910_DROME	CG8550	CG8550	0.229222	0.305763	0.395
A1Z920	A1Z920_DROME	fra	FI24025p1	0.701882	0.00720051	0.0165638
A1Z933	A1Z933_DROME	CG33672-RA	CG33672	-0.361002	0.199474	0.278919
A1Z934	A1Z934_DROME	CG8778	CG8778	-0.878019	5.68201e-07	7.63274e-06
A1Z936	A1Z936_DROME	ZnT49B	CG8632,_isoform_A	-0.015117	0.863909	0.901034
A1Z942	A1Z942_DROME	nemy	No_extended_memory,_isoform_E	2.17833	1.92417e-08	5.58788e-07
A1Z945	A1Z945_DROME	CG8771	CG8771	0.663329	5.2541e-07	7.20507e-06
A1Z979	A1Z979_DROME	CG13324	CG13324	1.34982	0.000607868	0.00206626
A1Z987	A1Z987_DROME	Cap-G	Cap-G,_isoform_F	-0.101769	0.669733	0.744082
A1Z992	A1Z992_DROME	AGBE	CG33138	-0.581962	0.000758759	0.00248016
A1Z9A2	U587_DROME	CG4646	UPF0587_protein_CG4646	0.06307	0.635814	0.716295
A1Z9A8	PTCD3_DROME	CG4679	Protein_PTCD3_homolog,_mitochondrial	-0.103554	0.419214	0.512566
A1Z9C8	A1Z9C8_DROME	CG42321	CG42321,_isoform_K	0.139017	0.115637	0.17669
A1Z9D3	A1Z9D3_DROME	cnn	Centrosomin,_isoform_E	-0.347675	0.0197288	0.0396218
A1Z9D7	A1Z9D7_DROME	arr	Arrow	-0.0414749	0.800916	0.850339
A1Z9E2	LIN54_DROME	mip120	Protein_lin-54_homolog	-0.192373	0.366576	0.459043
A1Z9E3	A1Z9E3_DROME	EfTuM	Elongation_factor_Tu	-0.204757	0.101672	0.158781
A1Z9F9	A1Z9F9_DROME	CG13335	CG13335,_isoform_A	1.47047	0.0011805	0.00356935
A1Z9G2	A1Z9G2_DROME	CG6197-RA	CG6197	0.319499	0.00148571	0.0043416
A1Z9I0	A1Z9I0_DROME	CG6357	CG6357	-0.0948985	0.551644	0.639469
A1Z9J0	A1Z9J0_DROME	shot	Short_stop,_isoform_E	0.149153	0.124148	0.187868
A1Z9J3	A1Z9J3_DROME	shot	Short_stop,_isoform_H	0.165507	0.0617882	0.104979
A1Z9J6	A1Z9J6_DROME	mRpL53	Mitochondrial_ribosomal_protein_L53	-0.456321	0.000412257	0.00148685
A1Z9K0	A1Z9K0_DROME	CG6701	CG6701	-0.281394	0.0759462	0.12465
A1Z9L3	A1Z9L3_DROME	pea	FI05376p	0.424236	0.000202258	0.00082146
A1Z9L9	A1Z9L9_DROME	CG18327	CG18327	-0.347986	0.0217882	0.043147
A1Z9M0	A1Z9M0_DROME	CG18324	CG18324,_isoform_B	-0.548493	0.000128858	0.000562454
A1Z9M2	A1Z9M2_DROME	CG8331	CG8331	-0.0100049	0.90726	0.931931
A1Z9M3	A1Z9M3_DROME	cg	Combgap,_isoform_B	-0.330428	0.251601	0.337618
A1Z9M5	A1Z9M5_DROME	CG30069	CG30069	0.334005	0.00481799	0.0118134
A1Z9N0	A1Z9N0_DROME	opa1-like	Optic_atrophy_1-like,_isoform_A	-0.4486	0.000330301	0.00123103
A1Z9N6	A1Z9N6_DROME	conv	Acid_labile_subunit	-0.221876	0.245003	0.330265
A1Z9P3	SHRM_DROME	Shroom	Protein_Shroom	-0.702745	0.000983205	0.00307182
A1Z9R1	A1Z9R1_DROME	CG17386-RA	CG17386	-1.54002	0.0171495	0.0352245
A1Z9R6	A1Z9R6_DROME	Asx	Additional_sex_combs,_isoform_B	-0.565871	0.0106053	0.0230316
A1Z9S6	A1Z9S6_DROME	Su(var)2-HP2	Su(Var)2-HP2,_isoform_A	0.266655	0.219869	0.302553
A1Z9W2	A1Z9W2_DROME	CG33506-RA	CG33506	-0.879166	2.01802e-06	2.06908e-05
A1Z9W4	A1Z9W4_DROME	Inr-a	LD11480p	0.0247876	0.898636	0.925722
A1Z9X0	A1Z9X0_DROME	aPKC	Atypical_protein_kinase_C,_isoform_A	0.305572	0.0607932	0.103697
A1ZA18	A1ZA18_DROME	Khc-73	Kinesin-73,_isoform_A	0.546824	3.76315e-06	3.31514e-05
A1ZA22	A1ZA22_DROME	eIF2B-gamma	eIF2B-gamma	0.199193	0.00896537	0.020014
A1ZA47	ZASP_DROME	Zasp52	PDZ_and_LIM_domain_protein_Zasp	-0.385204	0.0741208	0.122333
A1ZA47-2	ZASP_DROME	Zasp52	Isoform_A_of_PDZ_and_LIM_domain_protein_Zasp	0.388181	0.0181556	0.0369437
A1ZA47-4	ZASP_DROME	Zasp52	Isoform_E_of_PDZ_and_LIM_domain_protein_Zasp	-0.428878	0.485694	0.577408
A1ZA67	A1ZA67_DROME	Strn-Mlck	Stretchin-Mlck,_isoform_C	-0.869213	0.230018	0.313915
A1ZA72	A1ZA72_DROME	Strn-Mlck	Stretchin-Mlck,_isoform_D	-0.566846	0.000175305	0.000724884
A1ZA83	A1ZA83_DROME	CG8397	CG8397	-0.0205411	0.87065	0.905996
A1ZA89	A1ZA89_DROME	Dg	Dystroglycan,_isoform_B	-0.199858	0.0485671	0.0857348
A1ZA92	NOL9_DROME	CG8414	Polynucleotide_5'-hydroxyl-kinase_NOL9	0.491315	7.3873e-05	0.000354139
A1ZAA5	A1ZAA5_DROME	Got1	Glutamate_oxaloacetate_transaminase_1,_isoform_B	0.119191	0.49359	0.584858
A1ZAA9	A1ZAA9_DROME	CG10731	CG10731	-0.907381	7.25283e-08	1.58332e-06
A1ZAB1	A1ZAB1_DROME	lbk	Lambik	-0.477919	0.0116008	0.0248964
A1ZAB3	A1ZAB3_DROME	Ptp52F	FI18312p1	0.396565	0.0412292	0.0745896
A1ZAB5	CLU_DROME	clu	Protein_clueless	-0.640942	0.000129673	0.000565029
A1ZAC0	A1ZAC0_DROME	Tsf3	FI03676p	0.429773	0.0113565	0.0244542
A1ZAC7	A1ZAC7_DROME	fidipidine	Fidipidine	-0.367981	9.46587e-05	0.000437417
A1ZAE2	A1ZAE2_DROME	CG8060	CG8060	-0.648781	6.69763e-07	8.6501e-06
A1ZAF5	A1ZAF5_DROME	Sema-2b	CG33960,_isoform_A	-0.0616858	0.826913	0.87186
A1ZAG1	A1ZAG1_DROME	CG4398	CG4398	-0.253163	0.0471543	0.0837409
A1ZAH8	A1ZAH8_DROME	RpS15	Ribosomal_protein_S15,_isoform_B	-0.7952	7.46251e-07	9.34954e-06
A1ZAI3	FACR2_DROME	CG8303	Putative_fatty_acyl-CoA_reductase_CG8303	0.01802	0.941691	0.958743
A1ZAI5	FACR1_DROME	CG5065	Putative_fatty_acyl-CoA_reductase_CG5065	-0.0103496	0.954205	0.968274
A1ZAJ2	KIF1A_DROME	unc-104	Kinesin-like_protein_unc-104	0.268765	0.0594382	0.101813
A1ZAJ7	A1ZAJ7_DROME	CG15615	CG15615	0.0261334	0.931824	0.951134
A1ZAJ8	A1ZAJ8_DROME	CG5550-RA	CG5550	0.447397	0.0314337	0.0589924
A1ZAK3	A1ZAK3_DROME	Dek	Dek,_isoform_C	0.0394191	0.645268	0.725241
A1ZAK7	A1ZAK7_DROME	Psi	LD35640p	0.0728289	0.545925	0.634304
A1ZAN2	A1ZAN2_DROME	Ehbp1	CG15609,_isoform_G	-0.109926	0.478284	0.570353
A1ZAN6	A1ZAN6_DROME	RhoGEF2	RhoGEF2,_isoform_D	-0.319793	0.00132549	0.00394039
A1ZAP8	A1ZAP8_DROME	CG30460	CG30460,_isoform_C	0.0750968	0.724783	0.790557
A1ZAQ3	A1ZAQ3_DROME	CG30456	CG30456,_isoform_B	0.414798	0.0846709	0.135863
A1ZAQ4	A1ZAQ4_DROME	CG15611	CG15611,_isoform_A	0.0421189	0.75453	0.813293
A1ZAS3	A1ZAS3_DROME	l(2)k01209	Uridine_kinase	1.27779	1.81667e-07	3.19344e-06
A1ZAT5	A1ZAT5_DROME	Tes	CG6522	0.213392	0.131449	0.197135
A1ZAU2	A1ZAU2_DROME	CG18431-RA	CG18431	-0.914345	0.00840056	0.0189342
A1ZAU4	A1ZAU4_DROME	CG4847-RD	CG4847,_isoform_D	1.20716	0.000493058	0.00172502
A1ZAU8	SSP4_DROME	ssp4	Short_spindle_protein_4	-0.136487	0.302378	0.391735
A1ZAV3	A1ZAV3_DROME	MESR4	Misexpression_suppressor_of_ras_4,_isoform_A	-0.00951221	0.942043	0.958743
A1ZAW0	A1ZAW0_DROME	Dcr-2	Dicer-2	0.259342	0.00636825	0.0149018
A1ZAW7	A1ZAW7_DROME	CG11423	CG11423	-0.842842	5.84111e-06	4.62137e-05
A1ZAX1	EIF3C_DROME	eIF3-S8	Eukaryotic_translation_initiation_factor_3_subunit_C	-0.24799	0.0252263	0.049142
A1ZAX2	A1ZAX2_DROME	CG30108	CG30108	-0.593013	0.0551955	0.0957204
A1ZAZ2	A1ZAZ2_DROME	CG6385	CG6385	0.763389	0.00118078	0.00356935
A1ZB00	A1ZB00_DROME	aft	Adrift	-0.296664	0.03746	0.0686607
A1ZB29	A1ZB29_DROME	CG5757	CG5757	1.32563	1.67663e-10	1.58932e-08
A1ZB68	A1ZB68_DROME	GstE3	FI01423p	1.39682	0.000167242	0.00069902
A1ZB70	A1ZB70_DROME	GstE5	Glutathione_S_transferase_E5	-0.414503	0.132145	0.19806
A1ZB71	A1ZB71_DROME	GstE6	Glutathione_S_transferase_E6	0.592438	0.0111636	0.0240815
A1ZB72	A1ZB72_DROME	GstE7	Glutathione_S_transferase_E7	0.749901	0.0092266	0.0204836
A1ZB77	A1ZB77_DROME	CG5174	CG5174,_isoform_J	-0.0784663	0.296551	0.385777
A1ZB84	A1ZB84_DROME	CG12263-RA	CG12263	-0.523005	5.02828e-05	0.00025804
A1ZB86	KLD10_DROME	slim	Kelch_domain-containing_protein_10_homolog	-0.662382	0.000306989	0.00115702
A1ZBA5	A1ZBA5_DROME	mRpS28	FI07234p	-0.442302	0.0123633	0.0263043
A1ZBB1	A1ZBB1_DROME	CG5335-RA	Galectin	0.626083	0.000959733	0.00301168
A1ZBB4	A1ZBB4_DROME	CG30122	CG30122,_isoform_B	0.182826	0.090801	0.14418
A1ZBD8	A1ZBD8_DROME	CG15080	CG15080	-0.761155	0.0218891	0.0432786
A1ZBD9	A1ZBD9_DROME	MFS15	CG15094,_isoform_A	0.460939	0.00802156	0.0182354
A1ZBE8	DOP1_DROME	CG15099	Protein_dopey-1_homolog	0.239549	0.0214248	0.0424944
A1ZBE9	A1ZBE9_DROME	CG15100	CG15100	-0.164143	0.0844855	0.135609
A1ZBG9	A1ZBG9_DROME	CG15117-RB	CG15117,_isoform_B	0.0922917	0.666872	0.74271
A1ZBH1	A1ZBH1_DROME	CG15118	CG15118,_isoform_D	0.234095	0.0664304	0.111733
A1ZBH2	A1ZBH2_DROME	CG15111	CG15111,_isoform_A	0.0983206	0.20669	0.287649
A1ZBH7	A1ZBH7_DROME	hppy	Happyhour,_isoform_A	-0.285516	0.000204521	0.00082864
A1ZBJ2	A1ZBJ2_DROME	CG7461	CG7461	-0.094385	0.458124	0.550363
A1ZBK7	A1ZBK7_DROME	cer	Crammer	0.457807	0.0514944	0.090268
A1ZBM2	A1ZBM2_DROME	TBCB	CG11242	0.632269	4.03394e-07	5.84049e-06
A1ZBN3	A1ZBN3_DROME	sm	FI03683p	-0.611558	0.00350424	0.00909834
A1ZBR1	A1ZBR1_DROME	CG16898	CG16898	-1.30399	1.16462e-08	3.84937e-07
A1ZBR2	A1ZBR2_DROME	18w	18_wheeler	0.0565913	0.63813	0.718294
A1ZBT5	MED8_DROME	MED8	Mediator_of_RNA_polymerase_II_transcription_subunit_8	-0.0669766	0.690753	0.761708
A1ZBT6	A1ZBT6_DROME	CG8929	CG8929,_isoform_C	-0.211166	0.303026	0.392381
A1ZBU8	A1ZBU8_DROME	CG18067	CG18067	1.78407	2.7105e-05	0.000156165
A1ZBW0	A1ZBW0_DROME	bl	Bancal,_isoform_C	-0.184446	0.0186935	0.0378389
A1ZBW7	FAM21_DROME	CG16742	WASH_complex_subunit_FAM21_homolog	0.337596	0.0106764	0.0231699
A1ZBX8	A1ZBX8_DROME	Lrt	CG11136	0.601736	0.000264582	0.00102566
A2RVF0	A2RVF0_DROME	Atet	ABC_transporter_expressed_in_trachea,_isoform_C	0.469105	0.000199993	0.000814236
A2VEI2-2	MICU1_DROME	CG4495	Isoform_A_of_Calcium_uptake_protein_1_homolog,_mitochondrial	0.0477778	0.876322	0.910955
A4IJ59	A4IJ59_DROME	mub	IP17311p	-0.699622	0.00248388	0.00678732
A4UZB1	A4UZB1_DROME	magu	CG2264,_isoform_F	-0.0521762	0.777249	0.830829
A4UZI6	A4UZI6_DROME	Rho1	Rho1,_isoform_C	0.14279	0.145716	0.214623
A4UZL5	A4UZL5_DROME	GstS1	Glutathione_S_transferase_S1,_isoform_C	-0.766807	6.12797e-05	0.000301832
A4UZR3	A4UZR3_DROME	Treh	Trehalase,_isoform_E	-0.482477	0.00266419	0.00719073
A4UZW2	A4UZW2_DROME	Sam-S	S-adenosylmethionine_synthase	-0.928592	0.00412222	0.0103395
A4UZX7	A4UZX7_DROME	crq	Croquemort,_isoform_B	0.503341	0.00445536	0.0110646
A4UZZ4	A4UZZ4_DROME	GlyP	Phosphorylase	-0.888577	1.46073e-05	9.51843e-05
A4V0B5	A4V0B5_DROME	nrv2	Nervana_2,_isoform_F	0.536295	0.00619311	0.0145598
A4V0N4	A4V0N4_DROME	Vha68-2	MIP16230p	0.509726	0.000483105	0.00169492
A4V0S1	A4V0S1_DROME	Syx5	Syntaxin_5,_isoform_B	0.211379	0.0429038	0.0773407
A4V110	A4V110_DROME	CaMKI	Calcium/calmodulin-dependent_protein_kinase_I,_isoform_I	0.75529	0.000142571	0.000613777
A4V164	A4V164_DROME	Pdk1	Phosphoinositide-dependent_kinase_1,_isoform_F	-0.330537	0.00433	0.0107853
A4V1B2	A4V1B2_DROME	Patj	Patj,_isoform_B	0.0457037	0.599249	0.682837
A4V1N8	A4V1N8_DROME	Prm	FI03688p	-0.599179	0.0282728	0.0540703
A4V1N9	A4V1N9_DROME	Prm	Paramyosin,_isoform_D	0.606831	0.343204	0.43465
A4V1P2	A4V1P2_DROME	orb2	Orb2,_isoform_B	0.0499682	0.81331	0.861132
A4V1Q0	A4V1Q0_DROME	bol	Boule,_isoform_D	-0.581513	0.0807171	0.130561
A4V1U5	A4V1U5_DROME	GlcAT-P	GlcAT-P,_isoform_C	0.35673	0.02086	0.0415546
A4V1Y6	A4V1Y6_DROME	Trl	Trithorax-like,_isoform_F	-0.291434	0.411291	0.504227
A4V201	A4V201_DROME	Taf4	TBP-associated_factor_4,_isoform_D	-0.128824	0.20704	0.287976
A4V2B8	A4V2B8_DROME	CkIIalpha	Casein_kinase_IIalpha,_isoform_C	-0.266809	0.00132241	0.00393357
A4V2F2	A4V2F2_DROME	mtd	L(3)82Fd,_isoform_U	0.29971	0.0495364	0.0872007
A4V2I0	A4V2I0_DROME	Ama	Amalgam,_isoform_C	0.252341	0.270361	0.358077
A4V2J1	A4V2J1_DROME	Mlp84B	Muscle_LIM_protein_at_84B,_isoform_B	-0.195215	0.344504	0.436187
A4V2J2	A4V2J2_DROME	alphaTub84D	Alpha-Tubulin_at_84D,_isoform_B	-0.0662977	0.370797	0.463173
A4V2K7	A4V2K7_DROME	D1	D1_chromosomal_protein,_isoform_C	-0.225146	0.257471	0.343934
A4V2N5	A4V2N5_DROME	Timp	Tissue_inhibitor_of_metalloproteases,_isoform_B	-0.160669	0.235546	0.319834
A4V2S3	A4V2S3_DROME	CtBP	C-terminal_binding_protein,_isoform_B	-0.0757991	0.466542	0.558963
A4V2Z1	A4V2Z1_DROME	wah	CG4699,_isoform_D	0.0125349	0.908884	0.932836
A4V303	A4V303_DROME	Cctgamma	Cctgamma,_isoform_B	0.0541877	0.548284	0.636456
A4V370	A4V370_DROME	Mvl	FI04486p	-0.255143	0.0445179	0.0796701
A4V383	A4V383_DROME	ND42	NADH:ubiquinone_reductase_42kD_subunit,_isoform_B	-0.868583	4.12196e-06	3.57047e-05
A4V391	A4V391_DROME	T-cp1	T-complex_protein_1_subunit_alpha	-0.0245083	0.79284	0.844083
A4V392	A4V392_DROME	AdipoR	CG5315,_isoform_C	-0.785362	6.45648e-06	4.98738e-05
A4V3G8	A4V3G8_DROME	ball	Ballchen,_isoform_B	0.08363	0.560757	0.647791
A4V3G9	A4V3G9_DROME	Rb97D	Ribonuclear_protein_at_97D,_isoform_C	0.994992	6.74484e-05	0.000328991
A4V3J5	A4V3J5_DROME	Hrb98DE	Heterogeneous_nuclear_ribonucleoprotein_at_98DE,_isoform_C	0.189228	0.0985046	0.154459
A4V3N7	A4V3N7_DROME	CDase	Ceramidase,_isoform_B	0.252439	0.161546	0.234094
A4V3Q6	A4V3Q6_DROME	Ef1alpha100E	Elongation_factor_1-alpha	-0.311931	0.02861	0.0546527
A4V3W0	A4V3W0_DROME	egh	Egghead,_isoform_C	-0.0552396	0.608133	0.691392
A4V3W1	A4V3W1_DROME	sgg	Shaggy,_isoform_J	-0.946096	1.83183e-09	9.58658e-08
A4V3W8	A4V3W8_DROME	CG32795	CG32795,_isoform_C	0.360414	0.0451677	0.0807267
A4V402	A4V402_DROME	MAPk-Ak2	LD26767p	-0.10079	0.251325	0.337407
A4V408	A4V408_DROME	Efr	ER_GDP-fucose_transporter,_isoform_B	-0.171289	0.671984	0.745594
A4V441	A4V441_DROME	sn	Singed,_isoform_B	-0.233833	0.25106	0.337253
A4V448	A4V448_DROME	Gclc	Glutamate-cysteine_ligase_catalytic_subunit,_isoform_B	0.453747	0.00128507	0.00383611
A4V449	A4V449_DROME	ND75	NADH:ubiquinone_reductase_75kD_subunit,_isoform_B	-1.03087	5.46373e-06	4.39197e-05
A4V488	A4V488_DROME	ras	Inosine-5'-monophosphate_dehydrogenase	0.536682	5.62778e-05	0.000281613
A4V4A1	A4V4A1_DROME	Klp10A	Klp10A,_isoform_B	-0.0283946	0.789765	0.841522
A4V4A5	A4V4A5_DROME	Ran	Ran,_isoform_B	0.200421	0.0188173	0.0380282
A4V4F2	A4V4F2_DROME	Flo-2	Flotillin-2,_isoform_F	-0.477389	3.15708e-05	0.000176825
A4V4I0	A4V4I0_DROME	Gbeta13F	G_protein_beta-subunit_13F,_isoform_B	-0.0227284	0.780006	0.832713
A4V4I8	A4V4I8_DROME	shi	Shibire,_isoform_F	0.295481	0.0259076	0.0502354
A4V4N7	A4V4N7_DROME	CG4678	CG4678,_isoform_G	-0.492503	0.0053589	0.0129128
A4V4Q7	A4V4Q7_DROME	ari-1	Ariadne,_isoform_C	-0.639647	0.000422974	0.00152004
A4V4S5	A4V4S5_DROME	car	Carnation,_isoform_B	0.373262	0.000812194	0.00262747
A4V4T4	A4V4T4_DROME	sw	SD27396p	-0.286277	0.0303956	0.0573442
A4V4U5	A4V4U5_DROME	slgA	Sluggish_A,_isoform_F	-0.939364	5.15632e-05	0.000263534
A4V4V2	A4V4V2_DROME	DIP1	DISCO_interacting_protein_1,_isoform_B	1.15409	9.83928e-10	6.33751e-08
A4VCL2	A4VCL2_DROME	CG31145	CG31145,_isoform_C	0.164617	0.184932	0.261939
A5XCL5	A5XCL5_DROME	UGP	LD36265p_(Fragment)	-1.39999	7.42902e-08	1.60877e-06
A8DWJ8	A8DWJ8_DROME	Nox	NADPH_oxidase	-0.135023	0.490374	0.582007
A8DY44	A8DY44_DROME	Nipped-A	Nipped-A,_isoform_D	-0.0441733	0.671073	0.745163
A8DY69	A8DY69_DROME	Lpin	CG8709,_isoform_B	0.902697	7.06676e-05	0.000342366
A8DY78	A8DY78_DROME	Pdk	Pyruvate_dehydrogenase_kinase,_isoform_B	0.841198	0.00140331	0.00412776
A8DY80	A8DY80_DROME	Not1	Not1,_isoform_D	-0.222742	0.013225	0.0278934
A8DY97	A8DY97_DROME	CG30015	CG30015,_isoform_C	-0.89231	0.000470816	0.00165875
A8DYB0	A8DYB0_DROME	CG13185	CG13185,_isoform_C	1.21227	5.6176e-09	2.23991e-07
A8DYE0	A8DYE0_DROME	CG10249-RD	CG10249,_isoform_D	0.0689514	0.608981	0.692199
A8DYE2	TRPCG_DROME	Trpm	Transient_receptor_potential_cation_channel_trpm	0.337009	0.00354008	0.00915357
A8DYF7	A8DYF7_DROME	mrj	Mrj,_isoform_E	0.536409	0.000207226	0.000837575
A8DYG9	A8DYG9_DROME	Pkc53E	Protein_kinase_C	-0.188861	0.322794	0.411917
A8DYH2	UFM1_DROME	CG34191	Ubiquitin-fold_modifier_1	0.218946	0.23109	0.314974
A8DYI1	A8DYI1_DROME	CG30118	CG30118,_isoform_B	-0.136536	0.15797	0.229641
A8DYI6	A8DYI6_DROME	l(2)03709	Lethal_(2)_03709,_isoform_E	-0.390303	0.000628419	0.00211749
A8DYJ0	A8DYJ0_DROME	endoB	Endophilin_B,_isoform_D	0.552479	0.00497768	0.0121221
A8DYJ3	A8DYJ3_DROME	CalpA	Calpain-A,_isoform_C	0.460989	0.00105044	0.00323173
A8DYL3	A8DYL3_DROME	Vrp1	Verprolin_1,_isoform_G	0.0438558	0.883859	0.916325
A8DYP0	A8DYP0_DROME	Unc-89	Unc-89,_isoform_C	-0.485216	0.135853	0.201991
A8DYT1	A8DYT1_DROME	CG7337	CG7337,_isoform_D	0.227892	0.024198	0.0473406
A8DYU1	A8DYU1_DROME	CG15411	CG34394,_isoform_D	-0.0766023	0.38268	0.475534
A8DYW2	A8DYW2_DROME	CG31635	CG31635,_isoform_B	-0.490518	0.00161489	0.00466545
A8DYW8	A8DYW8_DROME	RapGAP1	Rapgap1,_isoform_H	-0.423895	0.0307339	0.0578737
A8DYX8	A8DYX8_DROME	Hnf4	Hepatocyte_nuclear_factor_4,_isoform_D	-0.573948	0.00014079	0.000607149
A8DZ02	A8DZ02_DROME	kuz	Kuzbanian,_isoform_F	0.120666	0.334431	0.42461
A8DZ14	A8DZ14_DROME	Fas3	FI17828p1	-0.13831	0.651816	0.730476
A8DZ18	A8DZ18_DROME	Lar	Leukocyte-antigen-related-like,_isoform_B	0.124701	0.256096	0.342384
A8DZ20	A8DZ20_DROME	RtGEF	Rho-type_guanine_exchange_factor,_isoform_D	0.153876	0.085166	0.136483
A8DZ24	A8DZ24_DROME	CG42748	CG42748,_isoform_D	-0.0551729	0.668873	0.743822
A8DZ26	A8DZ26_DROME	CG32000	CG32000,_isoform_H	0.323751	0.00138162	0.00407829
A8DZ29	A8DZ29_DROME	eIF4G	Eukaryotic_translation_initiation_factor_4G,_isoform_B	-0.114108	0.260485	0.346853
A8E702	A8E702_DROME	mRpL28	IP19992p	-0.653302	7.43885e-05	0.000355931
A8JNI2	A8JNI2_DROME	CG7971	CG7971,_isoform_F	0.516494	0.000630404	0.00212133
A8JNJ2	A8JNJ2_DROME	CG11486	CG11486,_isoform_O	-0.207359	0.139885	0.207371
A8JNJ6	A8JNJ6_DROME	kst	Karst,_isoform_E	0.287356	0.000407395	0.00147143
A8JNJ9	A8JNJ9_DROME	enc	Encore,_isoform_E	-0.869217	4.1433e-06	3.57048e-05
A8JNK1	A8JNK1_DROME	ens	Ensconsin,_isoform_F	0.00231348	0.987501	0.99154
A8JNK4	A8JNK4_DROME	Cip4	Cip4,_isoform_B	-0.0909417	0.32726	0.416663
A8JNN0	A8JNN0_DROME	pbl	Pebble,_isoform_E	1.10872	0.000158149	0.00066712
A8JNN1	A8JNN1_DROME	Ect4	Ectoderm-expressed_4,_isoform_D	0.708032	3.86485e-06	3.38275e-05
A8JNN5	A8JNN5_DROME	GAPcenA	GapcenA,_isoform_B	-0.128498	0.255721	0.342233
A8JNP1	A8JNP1_DROME	Argk	Arginine_kinase,_isoform_G	-0.696073	2.43311e-05	0.00014394
A8JNP7	A8JNP7_DROME	I-2	Inhibitor-2,_isoform_B	0.353536	0.0358051	0.0661585
A8JNQ4	A8JNQ4_DROME	A2bp1	Ataxin-2_binding_protein_1,_isoform_I	-0.703855	0.000280882	0.00107804
A8JNS4	A8JNS4_DROME	stv	Starvin,_isoform_E	0.373675	0.00385192	0.00979353
A8JNT4	A8JNT4_DROME	Mbs	Myosin_binding_subunit,_isoform_H	-0.737962	6.69128e-05	0.000327013
A8JNT7	A8JNT7_DROME	Hsc20	Lethal_(3)_72Do	-0.960527	6.67046e-08	1.50957e-06
A8JNU2	A8JNU2_DROME	Abl	Abl_tyrosine_kinase,_isoform_B	-0.349677	0.0287731	0.0549016
A8JNU6	A8JNU6_DROME	Nc73EF	Neural_conserved_at_73EF,_isoform_I	-0.546919	0.000429154	0.00153676
A8JNV2	A8JNV2_DROME	CG34253	CG34253	0.637724	0.02667	0.0514752
A8JNV5	A8JNV5_DROME	Rad9	Rad9,_isoform_B	0.415388	0.0140936	0.0295519
A8JNW5	A8JNW5_DROME	CG34261	CG34261	0.799604	2.20553e-05	0.000132701
A8JNX0	A8JNX0_DROME	ArfGAP3	ADP-ribosylation_factor_GTPase_activating_protein_3,_isoform_H	0.231984	0.046247	0.0823335
A8JNX2	A8JNX2_DROME	SPoCk	Secretory_pathway_calcium_atpase,_isoform_D	0.280504	0.0252449	0.0491591
A8JQU1	A8JQU1_DROME	CG1208	CG1208,_isoform_C	-0.0471412	0.902449	0.928698
A8JQV8	A8JQV8_DROME	pyd	Polychaetoid,_isoform_H	-0.0982127	0.401485	0.494621
A8JQW1	A8JQW1_DROME	CG8176	CG8176,_isoform_D	0.045113	0.560655	0.647791
A8JQW3	A8JQW3_DROME	Pnn	Pinin,_isoform_B	0.636843	0.016222	0.033525
A8JQX3	A8JQX3_DROME	cu	Nocturnin,_isoform_D	1.48458	3.35949e-06	3.03497e-05
A8JR05	A8JR05_DROME	cv-c	Crossveinless_c,_isoform_C	-0.197061	0.250756	0.336934
A8JR25	A8JR25_DROME	Fas1	Fasciclin_1,_isoform_D	0.17478	0.486627	0.578381
A8JR46	A8JR46_DROME	Ire1	Ire-1,_isoform_B	0.370086	0.0205159	0.0409504
A8JR58	A8JR58_DROME	CG5630	CG5630,_isoform_B	0.131782	0.282704	0.37104
A8JR84	A8JR84_DROME	CG7029	CG7029,_isoform_C	-0.680606	1.64895e-05	0.000106757
A8JR87	A8JR87_DROME	Irk1	FI16807p1	-0.93759	3.12422e-06	2.89596e-05
A8JR89	A8JR89_DROME	Pli	Pellino,_isoform_B	0.430739	0.0103322	0.0225495
A8JR94	A8JR94_DROME	CG31140	CG31140,_isoform_D	0.285265	0.130741	0.196248
A8JRA4	A8JRA4_DROME	CG6422	CG6422,_isoform_C	-0.232951	0.394078	0.487047
A8JRA6	A8JRA6_DROME	CG11819	CG34349,_isoform_B	-0.386641	0.0118499	0.0253335
A8JRB1	A8JRB1_DROME	CHKov1	CHKov1,_isoform_F	2.57659	5.45549e-11	8.21921e-09
A8JRC4	A8JRC4_DROME	LpR2	LpR2,_isoform_C	0.518388	0.00545155	0.0131109
A8JRD0	A8JRD0_DROME	LpR1	LpR1,_isoform_K	0.175506	0.3224	0.411519
A8JRD6	A8JRD6_DROME	CG34291	CG34291	0.156436	0.577771	0.662873
A8JRD7	A8JRD7_DROME	sda	Slamdance,_isoform_B	0.69607	0.000185013	0.000757541
A8JRE3	A8JRE3_DROME	woc	Without_children,_isoform_B	-0.0898141	0.454568	0.547399
A8JRF7	A8JRF7_DROME	Doa	Darkener_of_apricot,_isoform_Q	-0.670836	0.000264267	0.00102523
A8JRG9	A8JRG9_DROME	CG15531	CG15531,_isoform_B	0.462851	0.241714	0.326795
A8JRH3	A8JRH3_DROME	tmod	FI20012p1	0.398855	0.0154727	0.0321483
A8JTM7	A8JTM7_DROME	mgl	Megalin,_isoform_A	-0.418003	0.0297355	0.0563528
A8JUP7	A8JUP7_DROME	Hayan	CG6361,_isoform_B	0.525581	0.0115419	0.0248018
A8JUQ2	A8JUQ2_DROME	CG7378	CG7378,_isoform_B	0.292149	0.117606	0.179318
A8JUQ9	A8JUQ9_DROME	Vav	Vav,_isoform_C	0.00412773	0.952937	0.967182
A8JUU1	A8JUU1_DROME	Sec16	Sec16,_isoform_E	-0.131798	0.0852587	0.136588
A8JUV0	SBNO_DROME	sno	Protein_strawberry_notch	0.36105	0.00191327	0.00541231
A8JUV2	A8JUV2_DROME	Tango13	Transport_and_golgi_organization_13,_isoform_C	-0.0466888	0.617355	0.699975
A8JUV3	A8JUV3_DROME	NFAT	NFAT_homolog,_isoform_B	-0.0840504	0.661328	0.738008
A8JUY0	A8JUY0_DROME	Rnp4F	RNA-binding_protein_4F,_isoform_D	-0.205878	0.00879727	0.0196567
A8JUY3	A8JUY3_DROME	CG17209	DNA-directed_RNA_polymerase	0.0962742	0.137093	0.203594
A8JV04	A8JV04_DROME	CG3632	CG3632,_isoform_F	0.297987	0.0318273	0.0596421
A8JV09	A8JV09_DROME	pod1	Coronin	-0.103989	0.435036	0.528102
A8JV18	A8JV18_DROME	Nup153	Nucleoporin_153,_isoform_B	0.0693683	0.569574	0.655462
A8JV19	A8JV19_DROME	CG4829	CG4829,_isoform_E	0.55553	7.41131e-05	0.000354952
A8JV22	A8JV22_DROME	CG1440-RC	AT08049p	0.276061	0.0126752	0.0268579
A8JV30	A8JV30_DROME	CG34327-RA	CG34327	-0.0262484	0.917871	0.940523
A8QI34	A8QI34_DROME	CG40625	CG40625	0.357002	0.0143945	0.0300823
A8WHF7	A8WHF7_DROME	CG6393	CG42257,_isoform_G	0.157555	0.0717264	0.119204
A8WHL4	A8WHL4_DROME	bon	Bonus,_isoform_B	-0.033235	0.802973	0.851622
A8Y4Z5	A8Y4Z5_DROME	CG41378	CG41378,_isoform_C	-0.498493	0.000430598	0.0015398
A8Y516	A8Y516_DROME	uex	Unextended,_isoform_E	0.205766	0.0335478	0.0623776
A8Y560	A8Y560_DROME	RpL15	Ribosomal_protein_L15	-0.759226	1.98856e-06	2.05191e-05
A8Y582	A8Y582_DROME	CG41099	CG41099,_isoform_D	0.0242335	0.800822	0.850339
A8Y589	A8Y589_DROME	Alg-2	Apoptosis-linked_gene-2,_isoform_C	-0.186458	0.0898854	0.142861
A8Y592	A8Y592_DROME	spok	Spookier	-0.16267	0.629315	0.71033
A8Y596	A8Y596_DROME	Gfat1	Glutamine:fructose-6-phosphate_aminotransferase_1,_isoform_H	0.249787	0.459356	0.551711
B3DNL7	B3DNL7_DROME	how	Held_out_wings,_isoform_D	-0.815773	1.44998e-05	9.47297e-05
B5RIM9	B5RIM9_DROME	Gpdh	FI03663p	-1.15932	0.000121615	0.000535961
B5RIR1	B5RIR1_DROME	nrv1	FI04125p	0.227285	0.0295695	0.0561016
B5RIU6	B5RIU6_DROME	endoA	AT06279p	0.293816	0.0266064	0.0513723
B5RJQ0	B5RJQ0_DROME	ImpL3	L-lactate_dehydrogenase	0.0284162	0.91536	0.938141
B5RJS0	B5RJS0_DROME	CG4040-RA	CG42388,_isoform_E	-0.180484	0.0454987	0.0812725
B6IDQ5	B6IDQ5_DROME	CG4603-RA	CG4603,_isoform_C	-0.904267	1.75396e-07	3.12828e-06
B6IDV6	B6IDV6_DROME	Pvr	PDGF-and_VEGF-receptor_related,_isoform_G	0.62772	4.38711e-05	0.000230071
B7YZD8	B7YZD8_DROME	CAP	CAP,_isoform_Q	0.86096	1.15115e-06	1.30845e-05
B7YZH7	B7YZH7_DROME	CG8446-RD	CG8446,_isoform_D	-0.912965	7.10357e-08	1.55844e-06
B7YZJ0	B7YZJ0_DROME	mbl	Muscleblind,_isoform_E	0.127667	0.470813	0.56278
B7YZJ4	B7YZJ4_DROME	CG4975	CG4975,_isoform_C	0.788028	0.000143447	0.000616206
B7YZK4	B7YZK4_DROME	Jabba	CG42351,_isoform_E	0.840323	0.000124897	0.000547065
B7YZL9	B7YZL9_DROME	Fak	Focal_adhesion_kinase,_isoform_D	-0.0514029	0.571091	0.656639
B7YZM3	B7YZM3_DROME	CG30386	CG30387,_isoform_E	0.14083	0.131121	0.196701
B7YZN0	B7YZN0_DROME	Sdc	Syndecan	1.239	1.84517e-05	0.000115014
B7YZN1	B7YZN1_DROME	CG42362	CG42362	2.62599	2.76959e-12	2.34606e-09
B7YZP1	B7YZP1_DROME	MED23	Mediator_complex_subunit_23,_isoform_B	-0.0512727	0.663855	0.740411
B7YZP4	B7YZP4_DROME	St3	CG5431,_isoform_B	0.618486	0.00479494	0.0117626
B7YZP9	B7YZP9_DROME	Mlp60A	Muscle_LIM_protein_at_60A,_isoform_B	-0.58314	0.278281	0.366279
B7YZQ1	B7YZQ1_DROME	slik	Sterile20-like_kinase,_isoform_F	-0.416134	4.88286e-05	0.000252382
B7YZQ7	B7YZQ7_DROME	Nurf-38	Nucleosome_remodeling_factor-38kD,_isoform_B	0.246286	0.0714493	0.118861
B7YZR2	B7YZR2_DROME	Pal1	CG12130,_isoform_B	1.10561	1.21665e-05	8.22539e-05
B7YZR9	B7YZR9_DROME	Updo	Uroporphyrinogen_decarboxylase	-0.790751	1.24571e-05	8.37812e-05
B7YZT2	B7YZT2_DROME	Fis1	CG17510,_isoform_C	-0.183119	0.0737677	0.121911
B7YZU7	B7YZU7_DROME	lectin-22C	Lectin-22C	1.54226	2.14919e-05	0.000129558
B7YZV6	B7YZV6_DROME	Sfmbt	Scm-related_gene_containing_four_mbt_domains,_isoform_C	-0.690346	0.000972011	0.00304261
B7YZW3	B7YZW3_DROME	CG13260	CG42389,_isoform_E	-0.0254889	0.797349	0.847653
B7YZX6	B7YZX6_DROME	CG10600	CG10600,_isoform_B	1.15112	6.78435e-08	1.51487e-06
B7YZX9	B7YZX9_DROME	CG31688	CG31688,_isoform_B	0.0366743	0.722476	0.788555
B7YZY0	B7YZY0_DROME	CG31678	CG31678,_isoform_C	0.207192	0.0247947	0.0483759
B7YZY9	B7YZY9_DROME	Su(dx)	E3_ubiquitin-protein_ligase	0.341726	0.000907933	0.00287607
B7YZZ0	B7YZZ0_DROME	CG42371-RA	CG42371	-0.512264	0.00463087	0.0114383
B7YZZ9	B7YZZ9_DROME	Rrp1	Recombination_repair_protein_1,_isoform_B	1.07698	1.11929e-05	7.74564e-05
B7Z001	B7Z001_DROME	CG3523	CG3523,_isoform_C	1.83306	5.27406e-05	0.000267645
B7Z002	B7Z002_DROME	kis	Kismet,_isoform_C	-0.232132	0.17907	0.254971
B7Z005	B7Z005_DROME	drongo	Drongo,_isoform_I	0.0467013	0.671504	0.745225
B7Z006	B7Z006_DROME	pgant4	Polypeptide_GalNAc_transferase_4,_isoform_B	0.162199	0.774544	0.82882
B7Z010	B7Z010_DROME	capu	Cappuccino,_isoform_E	0.800351	5.69024e-05	0.000284455
B7Z025	B7Z025_DROME	PDZ-GEF	Dizzy_isoform_BII	0.0761582	0.356104	0.447827
B7Z028	B7Z028_DROME	CG9527	Acyl-coenzyme_A_oxidase	0.225434	0.0302659	0.0571639
B7Z031	B7Z031_DROME	pes	Peste,_isoform_C	-0.180461	0.162939	0.236046
B7Z036	B7Z036_DROME	uif	Uninflatable,_isoform_B	-0.853621	0.00558259	0.013394
B7Z063	B7Z063_DROME	Rbp6	RNA-binding_protein_6,_isoform_D	-0.893013	0.000234839	0.000931109
B7Z066	B7Z066_DROME	frc	Fringe_connection,_isoform_B	0.428381	0.00017031	0.000707724
B7Z067	B7Z067_DROME	Nedd4	Nedd4,_isoform_I	-0.0208385	0.848804	0.888504
B7Z072	B7Z072_DROME	fz2	Frizzled_2,_isoform_D	1.21519	1.43573e-06	1.5853e-05
B7Z078	B7Z078_DROME	CG8786-RC	CG8786,_isoform_C	0.104214	0.29234	0.381385
B7Z090	B7Z090_DROME	Psn	Presenilin,_isoform_C	-0.188037	0.0970972	0.152731
B7Z098	B7Z098_DROME	CG7414	CG7414,_isoform_D	0.144935	0.28484	0.373346
B7Z0A9	B7Z0A9_DROME	sowah	Sosondowah,_isoform_H	-0.454903	0.00160474	0.00464362
B7Z0B2	B7Z0B2_DROME	CG10359	CG10359,_isoform_E	0.277441	0.0331365	0.0617237
B7Z0B7	B7Z0B7_DROME	CG10625	CG10625,_isoform_J	0.100539	0.656098	0.734003
B7Z0B9	B7Z0B9_DROME	CG10625	CG10625,_isoform_H	-0.089512	0.641714	0.721731
B7Z0D3	B7Z0D3_DROME	CG7546	CG7546,_isoform_D	-0.225202	0.00722015	0.0166014
B7Z0E2	B7Z0E2_DROME	Unr	FI18812p1	-0.0737539	0.51553	0.605854
B7Z0G1	B7Z0G1_DROME	hay	Haywire,_isoform_B	0.504317	9.80885e-06	6.93104e-05
B7Z0G3	B7Z0G3_DROME	CG7394	CG7394,_isoform_B	-0.155262	0.143722	0.212308
B7Z0I8	B7Z0I8_DROME	CG14896	CG42232	-0.21751	0.215993	0.298528
B7Z0J4	B7Z0J4_DROME	CG42375-RA	CG42375	2.55465	3.06408e-07	4.79562e-06
B7Z0M9	B7Z0M9_DROME	CG15684	Oxysterol-binding_protein	0.402566	0.00379588	0.00968539
B7Z0P8	B7Z0P8_DROME	CG6364	CG6364,_isoform_B	-0.0173143	0.848889	0.888504
B7Z0Q8	B7Z0Q8_DROME	Lerp	Lysosomal_enzyme_receptor_protein,_isoform_D	0.328953	0.0549317	0.0954277
B7Z0R2	B7Z0R2_DROME	spg	CG31048,_isoform_C	0.146222	0.115476	0.176498
B7Z0T0	B7Z0T0_DROME	MP1	Melanization_protease_1,_isoform_C	0.89552	0.000174621	0.000722647
B7Z0T1	B7Z0T1_DROME	CG31534	CG31534,_isoform_D	-0.0261487	0.802754	0.85157
B7Z0U6	B7Z0U6_DROME	Best1	Bestrophin_1,_isoform_B	-0.317057	0.00358102	0.00922618
B7Z0U7	B7Z0U7_DROME	lap	Like-AP180,_isoform_C	0.340287	0.0037207	0.00952743
B7Z0V1	B7Z0V1_DROME	Taf7	TBP-associated_factor_7,_isoform_B	0.0982068	0.206591	0.287646
B7Z0V2	B7Z0V2_DROME	CG2698	CG2698,_isoform_B	-0.406275	0.00350394	0.00909834
B7Z0V3	B7Z0V3_DROME	CG2767	CG2767,_isoform_B	0.392028	0.0087781	0.0196354
B7Z0W3	B7Z0W3_DROME	Dmtn	CG1021,_isoform_G	0.557099	0.00389351	0.00986433
B7Z0X1	B7Z0X1_DROME	CG3011	Serine_hydroxymethyltransferase	0.598274	0.00143443	0.004207
B7Z0X3	B7Z0X3_DROME	rg	Rugose,_isoform_D	-0.112704	0.405077	0.49819
B7Z0Z0	B7Z0Z0_DROME	Dsp1	Dorsal_switch_protein_1,_isoform_F	-0.222833	0.300242	0.389771
B7Z107	B7Z107_DROME	cin-RB	CG42376,_isoform_A	-0.542246	0.00924375	0.0205126
B7Z134	B7Z134_DROME	CG7766	CG7766,_isoform_D	-0.568084	1.51352e-05	9.83692e-05
B7Z138	B7Z138_DROME	CG2967	CG34408,_isoform_D	-0.298925	0.00441875	0.0109791
B7Z143	B7Z143_DROME	CG11138	CG11138,_isoform_D	0.259758	0.0887643	0.141213
B7Z145	B7Z145_DROME	Ten-a	Tenascin_accessory,_isoform_E	0.173773	0.196559	0.275303
B7Z155	B7Z155_DROME	CG4928	CG4928,_isoform_B	1.3828	7.26746e-05	0.000350737
C0MIY4	C0MIY4_DROME	asf1	Anti-silencing_factor_1,_isoform_B	0.514385	0.00458218	0.0113348
C0PDF4	C0PDF4_DROME	CG18815-RA	CG18815,_isoform_D	-0.0753157	0.440658	0.533334
C0PUY1	C0PUY1_DROME	CG11168-RA	AT25426p	0.076009	0.400253	0.493466
C0PVB3	C0PVB3_DROME	Alr	Sulfhydryl_oxidase	0.370135	0.00471781	0.011615
C4NYP8	F10A1_DROME	HIP	Hsc70-interacting_protein_1	-0.379268	0.00140097	0.00412572
C6SV09	C6SV09_DROME	Lint-1	IP16414p	-0.199373	0.24147	0.326641
C6SV36	C6SV36_DROME	CG3884-RB	CG3884,_isoform_C	0.871012	0.000342124	0.00126851
C6SV41	C6SV41_DROME	Trp1	AT13927p	0.577426	0.0001874	0.000766693
C7LAG1	C7LAG1_DROME	CoRest	CoRest,_isoform_G	-0.0641373	0.55482	0.642114
C9QP21	C9QP21_DROME	Est-6	Esterase_6,_isoform_B	1.20944	1.76374e-05	0.00011132
C9QP42	C9QP42_DROME	eIF-4a	Eukaryotic_initiation_factor_4a,_isoform_E	0.244786	0.0187195	0.0378763
C9QPE7	C9QPE7_DROME	CG5171-RC	CG5171,_isoform_D	0.812778	0.0466579	0.0830062
D0IQG7	D0IQG7_DROME	Cht2	Chitinase_2,_isoform_B	-0.52009	0.0590514	0.101358
D1YSG0	D1YSG0_DROME	bt	Bent,_isoform_F	-1.03084	1.17189e-05	8.01649e-05
D1YSG7	D1YSG7_DROME	CaMKII	Calcium/calmodulin-dependent_protein_kinase_II,_isoform_I	-0.22883	0.122916	0.186339
D1Z3A1	D1Z3A1_DROME	RpL28	MIP15344p	-0.858199	9.75071e-07	1.15537e-05
D2A6L8	D2A6L8_DROME	fdy	Flagrante_delicto_Y_(Fragment)	-0.386886	0.0367504	0.0675078
D2NUK9	D2NUK9_DROME	hoip	Hoi-polloi,_isoform_B	0.406622	9.12482e-05	0.000424473
D3DMJ6	D3DMJ6_DROME	CG12272-RA	CG12272,_isoform_B	-0.00855649	0.895393	0.923626
D3DML3	D3DML3_DROME	Cka	Connector_of_kinase_to_AP-1,_isoform_E	-0.360596	0.000219612	0.000877749
D3DML7	D3DML7_DROME	sky	MIP14691p	0.288907	0.00842003	0.0189654
D3DMP8	D3DMP8_DROME	tko	MIP16231p	-0.731283	8.69619e-05	0.000407553
D3PFG8	D3PFG8_DROME	LysB	Lysozyme_B,_isoform_B	-0.802761	0.152647	0.22326
D3PFH9	D3PFH9_DROME	ssh	AT10562p	0.131445	0.471138	0.563035
D5A7R5	D5A7R5_DROME	CG9240	CG9240,_isoform_B	-0.908187	8.6418e-06	6.33167e-05
D5AEK7	D5AEK7_DROME	CG4729	CG4729,_isoform_E	-0.324029	0.000291034	0.00111106
D5SHN1	D5SHN1_DROME	CG13284-RB	CG13284,_isoform_C	0.227295	0.273427	0.361119
D5SHT6	D5SHT6_DROME	CG5707-RA	CG5707,_isoform_B	1.02165	0.000102393	0.000466385
D6W4K8	D6W4K8_DROME	CG17323-RA	CG17323,_isoform_B	-1.08053	9.16327e-05	0.000425474
E0R7R0	E0R7R0_DROME	CG32264-RE	CG32264,_isoform_K	-0.133334	0.321552	0.410854
E1JGK5	E1JGK5_DROME	Mapmodulin	Mapmodulin,_isoform_D	-0.292736	0.0061993	0.0145675
E1JGK6	E1JGK6_DROME	stau	Staufen,_isoform_C	-0.415901	0.000323033	0.00120933
E1JGK7	E1JGK7_DROME	lolal	Lola_like,_isoform_E	-0.20348	0.0638577	0.107967
E1JGN0	E1JGN0_DROME	par-1	Par-1,_isoform_P	-0.366215	9.60688e-05	0.000441667
E1JGN9	E1JGN9_DROME	exu	AT02443p	0.327511	0.231371	0.315187
E1JGP0	E1JGP0_DROME	Act57B	Actin_57B,_isoform_C	-0.729316	2.49299e-05	0.00014666
E1JGP2	E1JGP2_DROME	RIC-3	CG30296,_isoform_N	-0.12473	0.429162	0.522693
E1JGV6	E1JGV6_DROME	Nop60B	Nucleolar_protein_at_60B,_isoform_C	0.846129	8.6338e-08	1.80734e-06
E1JGW3	E1JGW3_DROME	ITP	Ion_transport_peptide,_isoform_E	0.0890427	0.674517	0.747908
E1JGX2	E1JGX2_DROME	Gprk1	G_protein-coupled_receptor_kinase_1,_isoform_B	-0.368057	0.000753168	0.00246509
E1JGX3	E1JGX3_DROME	Nipped-B	Nipped-B,_isoform_G	0.164571	0.111787	0.171824
E1JGY6	E1JGY6_DROME	l(2)01289	Lethal_(2)_01289,_isoform_F	-0.779421	0.00356974	0.00920184
E1JGZ1	E1JGZ1_DROME	Eaf	ELL-associated_factor,_isoform_C	-0.016218	0.881966	0.915072
E1JGZ9	E1JGZ9_DROME	CG30382	Proteasome_subunit_alpha_type	0.00811851	0.954854	0.968542
E1JH01	E1JH01_DROME	CSN4	COP9_complex_homolog_subunit_4,_isoform_B	-0.0224065	0.782314	0.834646
E1JH02	E1JH02_DROME	lig	Lingerer,_isoform_E	-0.433284	0.0313446	0.0588473
E1JH30	E1JH30_DROME	stan	Starry_night,_isoform_B	-0.351828	0.0750505	0.123488
E1JH51	E1JH51_DROME	Su(z)2	Suppressor_2_of_zeste_h29	-0.856562	0.000359525	0.00132618
E1JH67	E1JH67_DROME	AttB	Attacin-B,_isoform_B	0.700492	0.0208683	0.0415547
E1JHA4	E1JHA4_DROME	Hrb27C	Heterogeneous_nuclear_ribonucleoprotein_at_27C,_isoform_D	-0.108582	0.142196	0.210301
E1JHB2	E1JHB2_DROME	cdc14	Cdc14,_isoform_C	-0.182728	0.0493211	0.0868522
E1JHB4	E1JHB4_DROME	Piezo	Piezo,_isoform_G	0.521162	0.00242729	0.00664199
E1JHC8	E1JHC8_DROME	GlcAT-S	FI18306p1	-0.601702	0.000206715	0.000836854
E1JHD6	E1JHD6_DROME	bsk	Basket,_isoform_E	-0.0416917	0.584903	0.669374
E1JHE1	E1JHE1_DROME	Klp31E	Klp31E,_isoform_E	-0.190145	0.0252832	0.0492146
E1JHE4	E1JHE4_DROME	Fatp	Fatty_acid_(Long_chain)_transport_protein,_isoform_D	0.0948021	0.525944	0.615943
E1JHJ9	E1JHJ9_DROME	CLIP-190	Cytoplasmic_linker_protein_190,_isoform_M	-0.00681854	0.934916	0.953903
E1JHK1	E1JHK1_DROME	Dif	Dorsal-related_immunity_factor,_isoform_D	0.755837	0.000627505	0.00211583
E1JHM0	E1JHM0_DROME	CdGAPr	CdGAPr,_isoform_C	-0.0763099	0.676265	0.749351
E1JHN0	E1JHN0_DROME	CG14397-RA	CG14397	0.0856914	0.69051	0.761708
E1JHN2	E1JHN2_DROME	CG9249	CG9249,_isoform_B	-0.430915	0.00775423	0.0176998
E1JHQ1	E1JHQ1_DROME	Gs1	Glutamine_synthetase	0.415664	0.0477391	0.0845702
E1JHT5	E1JHT5_DROME	CG2950	CG2950,_isoform_D	-0.525339	5.41634e-05	0.000274035
E1JHT6	E1JHT6_DROME	Rtnl1	Reticulon-like_protein	0.405481	0.000844499	0.0027145
E1JHV6	E1JHV6_DROME	E(bx)	Enhancer_of_bithorax,_isoform_E	-0.167625	0.201496	0.281433
E1JHX5	E1JHX5_DROME	CG7611	CG7611,_isoform_B	-0.38876	5.10138e-05	0.000260991
E1JHY0	E1JHY0_DROME	CG5946	CG5946,_isoform_E	0.443651	0.0157615	0.0326766
E1JHY7	E1JHY7_DROME	Pop2	Pop2,_isoform_D	-0.214291	0.0667155	0.112118
E1JI13	E1JI13_DROME	Dab	Disabled,_isoform_F	0.323564	0.215502	0.297931
E1JI20	E1JI20_DROME	Nca	Neurocalcin,_isoform_B	0.0435243	0.666383	0.742495
E1JI40	E1JI40_DROME	verm	Vermiform,_isoform_E	-0.648505	0.00613493	0.0144432
E1JI46	E1JI46_DROME	Mi-2	Mi-2,_isoform_C	-0.0681644	0.5921	0.676378
E1JI58	E1JI58_DROME	Sin	Sex-lethal_interactor,_isoform_C	0.227957	0.0766871	0.125497
E1JI71	E1JI71_DROME	CG32352	CG43078,_isoform_E	-0.462473	0.00552461	0.0132739
E1JI84	E1JI84_DROME	CG5021	CG5021,_isoform_C	0.407937	0.00906083	0.020178
E1JI93	E1JI93_DROME	Tequila	Tequila,_isoform_E	0.269449	0.0986939	0.154659
E1JIB4	E1JIB4_DROME	CG2162	CG2162,_isoform_B	-0.435248	0.0354156	0.0654921
E1JIC5	E1JIC5_DROME	CG14995	CG14995,_isoform_G	0.234836	0.11297	0.173301
E1JIC9	E1JIC9_DROME	TfIIEbeta	Transcription_factor_IIEbeta,_isoform_B	0.116865	0.549896	0.637669
E1JID7	E1JID7_DROME	shep	Alan_shepard,_isoform_E	-0.519671	6.82601e-06	5.18818e-05
E1JIE1	E1JIE1_DROME	mp	Multiplexin,_isoform_B	0.76926	5.68675e-06	4.52061e-05
E1JIF5	E1JIF5_DROME	CG9837	CG9837,_isoform_C	0.835675	0.00383726	0.00976121
E1JIH2	E1JIH2_DROME	Unc-115a	CG31352,_isoform_C	-0.0293912	0.760167	0.817965
E1JIH5	E1JIH5_DROME	MED6	Mediator_of_RNA_polymerase_II_transcription_subunit_6	0.06745	0.529656	0.620133
E1JIJ5	E1JIJ5_DROME	Vha55	Vacuolar_H[+]-ATPase_55kD_B_subunit,_isoform_C	0.082388	0.505187	0.596788
E1JIJ7	E1JIJ7_DROME	CG7518	CG7518,_isoform_C	-0.471143	0.000401689	0.00145815
E1JIJ8	E1JIJ8_DROME	Ace	Acetylcholine_esterase,_isoform_B	0.632977	0.00150392	0.00438728
E1JIK0	E1JIK0_DROME	Hrb87F	Heterogeneous_nuclear_ribonucleoprotein_at_87F,_isoform_C	0.0249445	0.797374	0.847653
E1JIL4	E1JIL4_DROME	Caf1	Chromatin_assembly_factor_1_subunit,_isoform_B	-0.105292	0.352858	0.444635
E1JIL5	E1JIL5_DROME	mRpS10	Mitochondrial_ribosomal_protein_S10,_isoform_D	-0.666067	2.82516e-05	0.000161108
E1JIM4	E1JIM4_DROME	msps	Mini_spindles,_isoform_B	0.168843	0.177852	0.2537
E1JIN0	E1JIN0_DROME	Pxd	Peroxidase,_isoform_B	0.943285	0.145944	0.214833
E1JIN6	E1JIN6_DROME	osa	Osa,_isoform_D	-0.128487	0.368433	0.460863
E1JIQ4	E1JIQ4_DROME	CG4662	CG4662,_isoform_C	0.286579	0.00698736	0.0161252
E1JIR1	E1JIR1_DROME	CG4159	tRNA_pseudouridine_synthase	0.562226	1.69807e-05	0.000108631
E1JIS1	E1JIS1_DROME	CG7956	CG7956,_isoform_D	0.640372	1.30313e-05	8.6829e-05
E1JIT4	E1JIT4_DROME	CG7048	CG7048,_isoform_B	-0.448609	0.000228591	0.000908578
E1JIU5	E1JIU5_DROME	Irk2	Inwardly_rectifying_potassium_channel_2,_isoform_C	1.36703	0.00125126	0.00375079
E1JIV8	E1JIV8_DROME	nct	Nicastrin,_isoform_C	0.0271194	0.730488	0.794538
E1JIX8	E1JIX8_DROME	CG4743	CG4743,_isoform_B	-0.435334	0.00103804	0.0032093
E1JIZ0	E1JIZ0_DROME	scrib	Scribbled,_isoform_L	0.0707642	0.579256	0.664425
E1JIZ7	E1JIZ7_DROME	CG42487	CG42487	1.0384	2.30228e-08	6.39042e-07
E1JJ32	E1JJ32_DROME	cpx	Complexin,_isoform_S	0.636582	0.031188	0.058641
E1JJ49	E1JJ49_DROME	UbcD6	Ubiquitin_conjugating_enzyme,_isoform_B	-0.0358731	0.780728	0.833308
E1JJ50	E1JJ50_DROME	CG12173	CG12173,_isoform_B	0.237124	0.0154964	0.0321842
E1JJ51	E1JJ51_DROME	Pi4KIIalpha	Pi4KIIalpha,_isoform_D	0.620749	6.49827e-05	0.000318821
E1JJ55	E1JJ55_DROME	CG2082	CG2082,_isoform_H	0.0848146	0.51527	0.60569
E1JJ72	E1JJ72_DROME	Taf1	FI22504p1	-0.2065	0.0111073	0.0239703
E1JJ73	E1JJ73_DROME	CG1307	CG1307,_isoform_C	0.493378	5.16718e-05	0.000263552
E1JJ89	E1JJ89_DROME	CG18249	CG18249,_isoform_B	1.33316	1.20582e-07	2.339e-06
E1JJC3	E1JJC3_DROME	sdk	Sidekick,_isoform_B_(Fragment)	0.268933	0.00826848	0.0186784
E1JJD5	E1JJD5_DROME	norpA	No_receptor_potential_A,_isoform_E	0.434763	0.00715357	0.0164634
E1JJE0	E1JJE0_DROME	rb	Ruby,_isoform_B	-0.168201	0.024073	0.0471512
E1JJF3	E1JJF3_DROME	Inx2	Innexin	0.381871	0.00982434	0.0216196
E1JJF4	E1JJF4_DROME	sws	FI19439p1	0.966989	6.22886e-07	8.18126e-06
E1JJF8	E1JJF8_DROME	Nrg	Neuroglian,_isoform_E	-0.373364	0.00104155	0.0032139
E1JJG4	E1JJG4_DROME	APC4	Anaphase_promoting_complex_4,_isoform_C	0.322762	0.00252014	0.00687733
E1JJI5	E1JJI5_DROME	CkIalpha	Casein_kinase_ialpha,_isoform_D	-0.44976	2.63407e-05	0.000152989
E1JJJ8	E1JJJ8_DROME	fs(1)h	Female_sterile_(1)_homeotic,_isoform_F	0.018118	0.857553	0.89552
E1JJK6	E1JJK6_DROME	rdgB	Retinal_degeneration_B,_isoform_H	0.523523	0.00230045	0.00632938
E1JJL4	E1JJL4_DROME	Fur2	Furin_2,_isoform_I	0.00292643	0.977876	0.984933
E1JJM9	E1JJM9_DROME	RpS15Aa	Ribosomal_protein_S15Aa,_isoform_F	-0.752471	8.11273e-06	6.02934e-05
E1JJN1	E1JJN1_DROME	ben	Bendless,_isoform_B	-0.421928	0.000137643	0.000595622
E1JJN6	E1JJN6_DROME	X11L	X11L,_isoform_B	-0.016951	0.869107	0.904764
E1JJP0	E1JJP0_DROME	up	Upheld,_isoform_H	-0.939831	0.00122438	0.00368121
E1JJP7	E1JJP7_DROME	NetB	Netrin-B,_isoform_B	0.0221064	0.887496	0.91815
E1JJQ3	E1JJQ3_DROME	Grip84	Gamma-tubulin_ring_protein_84,_isoform_E	0.446011	0.00484723	0.0118677
E1JJR3	E1JJR3_DROME	pcm	Pacman,_isoform_B	0.174077	0.0390221	0.0712122
E1JJR9	E1JJR9_DROME	CG17065	CG17065,_isoform_B	0.797955	2.09766e-05	0.000126971
E1JJS1	E1JJS1_DROME	GstT3	Glutathione_S_transferase_T3,_isoform_B	0.198404	0.244294	0.329662
E1NZB4	E1NZB4_DROME	fne	Found_in_neurons,_isoform_D_(Fragment)	-0.35459	0.257969	0.344416
E1NZC4	E1NZC4_DROME	CG18769-RC	CG18769,_isoform_G	0.305185	0.0116005	0.0248964
E2QC56	E2QC56_DROME	CG10417	CG10417,_isoform_B	-0.637963	1.3607e-05	8.98309e-05
E2QC61	E2QC61_DROME	bin3	Bicoid-interacting_protein_3,_isoform_B	-0.680057	4.39485e-05	0.000230237
E2QC83	E2QC83_DROME	Pabp2	Pabp2,_isoform_B	-0.000185907	0.998332	0.999127
E2QC90	E2QC90_DROME	ced-6	Ced-6,_isoform_B	0.407731	0.000965223	0.00302702
E2QCG7	E2QCG7_DROME	eIF3-S9	Eukaryotic_translation_initiation_factor_3_subunit_B	-0.115191	0.171342	0.246371
E2QCK0	E2QCK0_DROME	Tango11	Transport_and_golgi_organization,_isoform_B	-0.30307	0.00511725	0.0124198
E2QCN9	E2QCN9_DROME	Gs1l	GS1-like,_isoform_B	-0.0483067	0.657819	0.735235
E2QCP0	E2QCP0_DROME	His3.3B	Histone_H3	-0.467151	0.000403387	0.00146037
E2QCQ3	E2QCQ3_DROME	milt	FI19826p1	-0.780359	4.01257e-07	5.82634e-06
E2QCS8	E2QCS8_DROME	tho2	Tho2,_isoform_B	0.316082	0.00164167	0.00473465
E2QCY2	E2QCY2_DROME	CG3961-RD	CG3961,_isoform_D	0.025684	0.763144	0.820289
E2QCY4	E2QCY4_DROME	fry	Furry,_isoform_C	0.0516885	0.536852	0.626369
E2QCZ3	E2QCZ3_DROME	CG7705-RA	CG7705,_isoform_A	-0.0575103	0.557056	0.644109
E2QCZ5	E2QCZ5_DROME	CG7706	CG7706	-0.0589809	0.480942	0.572851
E2QCZ8	E2QCZ8_DROME	CG31531	CG31531,_isoform_B	0.483869	0.00497562	0.0121221
E2QCZ9	E2QCZ9_DROME	CG1129	CG1129,_isoform_B	0.182761	0.0312975	0.0588028
E2QD00	E2QD00_DROME	jagn	Jagunal,_isoform_B	-0.437189	0.000568028	0.00195196
E2QD64	E2QD64_DROME	CG2982	CG2982	0.935322	2.41677e-08	6.52788e-07
E2QD65	E2QD65_DROME	RpS19a	Ribosomal_protein_S19a,_isoform_C	-0.78418	3.12409e-06	2.89596e-05
E2QD73	E2QD73_DROME	dnc	Dunce,_isoform_J	0.133726	0.313212	0.403063
E2QD75	E2QD75_DROME	Cbp80	Cap_binding_protein_80,_isoform_B	0.206452	0.0293047	0.0557465
E2QD98	E2QD98_DROME	sdt	Stardust,_isoform_G	-0.0188834	0.912311	0.935822
E4NKJ3	E4NKJ3_DROME	wupA	GH04081p	-0.950861	0.211008	0.292823
E4NKP2	E4NKP2_DROME	l(1)G0156	LP13001p1	-1.21387	5.80217e-07	7.75269e-06
E6EK15	E6EK15_DROME	PMCA	Plasma_membrane_calcium_ATPase,_isoform_P	-0.238851	0.00683349	0.0158282
E6PBV6	E6PBV6_DROME	CG1354-RA	AT07526p	-0.690022	7.7491e-05	0.000367972
E8NH13	E8NH13_DROME	dlg1	Discs_large_1,_isoform_P	-0.356823	0.00121241	0.00364738
E8NH67	E8NH67_DROME	CG9572-RB	CG9572,_isoform_B	1.62334	0.000260301	0.00101141
E8NHA2	E8NHA2_DROME	CG9153-RB	CG9153,_isoform_C	-0.0600486	0.464143	0.556528
E8NHB1	E8NHB1_DROME	Taf2	LD23043p	-0.399261	0.000251058	0.000980804
F0JAF7	F0JAF7_DROME	Rab35	MIP14774p	0.0763457	0.377288	0.469647
F0JAN1	F0JAN1_DROME	ade5	Ade5,_isoform_B	1.21852	1.22896e-05	8.28765e-05
F0JAP7	F0JAP7_DROME	CG15347-RB	CG15347,_isoform_B	0.79026	0.0756692	0.124317
F0JAQ9	F0JAQ9_DROME	Wbp2	MIP27169p	-0.153834	0.108475	0.167893
F2FB81	F2FB81_DROME	SCAR	MIP02973p	0.00109849	0.992064	0.994439
F3YDK4	F3YDK4_DROME	Pur-alpha	Purine-rich_binding_protein-alpha,_isoform_G	-0.150867	0.10718	0.166093
H0RNK3	H0RNK3_DROME	Sclp	FI16115p1	-0.764313	0.00157097	0.00456302
H5V864	H5V864_DROME	Spn	FI18374p1	-0.677089	7.31991e-05	0.000352309
H5V895	H5V895_DROME	flw	FI18647p1	-0.566462	2.7992e-06	2.6787e-05
H9XVL5	H9XVL5_DROME	plexB	Plexin_B,_isoform_B	-0.385891	0.00740273	0.0169668
H9XVM3	H9XVM3_DROME	CG2219	CG2219,_isoform_B	-0.58867	1.35992e-05	8.98309e-05
H9XVM5	H9XVM5_DROME	CG31998	CG31998,_isoform_B	0.0726535	0.540442	0.629323
H9XVM9	H9XVM9_DROME	CG1674	CG1674,_isoform_L	-0.427179	0.172042	0.247166
L0MLQ9	L0MLQ9_DROME	CG32016	CG32016,_isoform_H	-0.346493	0.0375647	0.0688276
L0MN91	L0MN91_DROME	bt	Bent,_isoform_I	-0.915657	1.16501e-05	7.99592e-05
L0MNA8	L0MNA8_DROME	Arf102F	ADP_ribosylation_factor_102F,_isoform_B	0.290689	0.0327072	0.0611086
L0MPS3	L0MPS3_DROME	Rfabg	Retinoid-and_fatty_acid-binding_glycoprotein,_isoform_B	-0.126842	0.479368	0.57151
L0MPZ1	L0MPZ1_DROME	bt	Bent,_isoform_H	-0.883498	0.0360962	0.0665495
L0MQ04	L0MQ04_DROME	ATPsyn-beta	ATP_synthase_subunit_beta	-0.64753	0.000502044	0.0017518
L0MQ08	L0MQ08_DROME	Cals	Calsyntenin-1,_isoform_C	-0.434428	0.00314782	0.00830601
M9MQH9	M9MQH9_DROME	Pp2A-29B	Protein_phosphatase_2A_at_29B,_isoform_C	-0.776411	1.04793e-08	3.6309e-07
M9MRC9	M9MRC9_DROME	RpL27A	Ribosomal_protein_L27A,_isoform_C	-0.929589	2.76742e-07	4.51412e-06
M9MRD0	M9MRD0_DROME	Uch	Ubiquitin_carboxy-terminal_hydrolase,_isoform_B	0.0574878	0.41217	0.505022
M9MRD4	M9MRD4_DROME	Msp-300	Muscle-specific_protein_300,_isoform_B	0.320316	0.000872052	0.00279111
M9MRD6	M9MRD6_DROME	Msp-300	Muscle-specific_protein_300,_isoform_I	0.3478	0.00102641	0.00318116
M9MRF2	M9MRF2_DROME	RpL37A	Ribosomal_protein_L37A,_isoform_C	-0.808245	5.84032e-06	4.62137e-05
M9MRG1	M9MRG1_DROME	CG18661	CG18661,_isoform_B	-0.756533	4.35834e-05	0.000229041
M9MRG2	M9MRG2_DROME	CG4747	CG4747,_isoform_B	-0.0478327	0.584396	0.668946
M9MRG5	M9MRG5_DROME	tai	Taiman,_isoform_F	-0.0759111	0.655339	0.733442
M9MRH0	M9MRH0_DROME	RluA-2	RluA-2,_isoform_C	-0.567699	0.00406718	0.0102424
M9MRH8	M9MRH8_DROME	Cnot4	Cnot_4_homologue,_isoform_H	-0.181743	0.156496	0.227961
M9MRH9	M9MRH9_DROME	CG42711	CG42711	0.513673	0.00411556	0.010328
M9MRI2	M9MRI2_DROME	Sema-1a	Sema-1a,_isoform_F	-0.595452	0.00586314	0.0139274
M9MRJ4	M9MRJ4_DROME	Msp-300	Muscle-specific_protein_300,_isoform_G	0.750985	2.88364e-07	4.6434e-06
M9MRK7	M9MRK7_DROME	tweek	Tweek,_isoform_H	0.433145	0.000635042	0.00213408
M9MRL9	M9MRL9_DROME	SmB	Small_nuclear_ribonucleoprotein-associated_protein	-0.000913973	0.995409	0.996997
M9MRM3	M9MRM3_DROME	Lip4	Lipase	1.10406	1.04402e-05	7.32561e-05
M9MRM4	M9MRM4_DROME	Sac1	Sac1,_isoform_B	-0.0943156	0.184203	0.261275
M9MRN5	M9MRN5_DROME	CG33231	CG42669,_isoform_G	-0.612551	0.000160259	0.000673758
M9MRP5	M9MRP5_DROME	Eip63F-1	Ecdysone-induced_protein_63F_1,_isoform_C	-0.588567	0.00807241	0.0183427
M9MRQ9	M9MRQ9_DROME	Scsalpha	Succinyl_coenzyme_A_synthetase_alpha_subunit,_isoform_B	-0.898608	5.36047e-06	4.33411e-05
M9MRS6	M9MRS6_DROME	CG18490	CG42671,_isoform_D	-0.412426	0.101995	0.159188
M9MRS7	M9MRS7_DROME	Myo31DF	Myosin_31DF,_isoform_C	-0.393608	0.00746978	0.0171049
M9MRT2	M9MRT2_DROME	Hsp67Bb	Heat_shock_gene_67Bb,_isoform_C	0.879705	0.00199022	0.00560475
M9MRT6	M9MRT6_DROME	R	Roughened,_isoform_B	-0.192387	0.0583123	0.100314
M9MRV7	M9MRV7_DROME	CG1332	CG43367,_isoform_C	-0.0277061	0.714382	0.781418
M9MRX4	M9MRX4_DROME	Ank2	Ankyrin_2,_isoform_U	0.0350857	0.880231	0.913505
M9MRX8	M9MRX8_DROME	Fdxh	Ferredoxin,_isoform_B	-0.321965	0.034935	0.0646935
M9MRY3	M9MRY3_DROME	Pka-R1	cAMP-dependent_protein_kinase_R1,_isoform_AA	0.577608	0.00056967	0.00195627
M9MRY7	M9MRY7_DROME	CG12024	CG12024,_isoform_C	-0.182729	0.179634	0.255661
M9MS06	M9MS06_DROME	Actn	Alpha_actinin,_isoform_D	-0.217549	0.240182	0.325074
M9MS14	M9MS14_DROME	moody	Moody,_isoform_C	0.580299	0.00109177	0.00333843
M9MS15	M9MS15_DROME	Nrt	Neurotactin,_isoform_C	0.00777147	0.972133	0.98151
M9MS41	M9MS41_DROME	Hr78	Hormone-receptor-like_in_78,_isoform_E	-0.398208	0.00801355	0.0182255
M9MS42	M9MS42_DROME	l(1)G0232	Lethal_(1)_G0232,_isoform_G	-0.0324436	0.694795	0.765494
M9MS48	M9MS48_DROME	Rbp1-like	Rbp1-like,_isoform_B	-0.37017	0.000308066	0.00116021
M9MS55	M9MS55_DROME	AMPdeam	CG32626,_isoform_H	0.140011	0.308481	0.397693
M9MS57	M9MS57_DROME	Ranbp16	Ranbp16,_isoform_E	0.246612	0.00702038	0.0161768
M9MS70	M9MS70_DROME	CG15786	CG42749,_isoform_C	-0.264644	0.256295	0.342545
M9MSF0	M9MSF0_DROME	CG6762	Sulfiredoxin	0.782054	0.00104258	0.0032139
M9MSF6	M9MSF6_DROME	CG42854	CG42854	3.32669	4.78019e-09	2.01812e-07
M9MSI4	M9MSI4_DROME	CG18095	CG18095,_isoform_B	1.23124	0.0044631	0.0110784
M9MSJ7	M9MSJ7_DROME	CG13923	CG42676,_isoform_C	0.234236	0.0919583	0.145787
M9MSK3	M9MSK3_DROME	Src64B	Src_oncogene_at_64B,_isoform_G	0.0324578	0.721216	0.787522
M9MSK4	M9MSK4_DROME	Sh3beta	Sh3beta,_isoform_D	0.107832	0.438706	0.531739
M9MSL3	M9MSL3_DROME	Hsc70Cb	Hsc70Cb,_isoform_G	-0.262395	0.0039407	0.00996379
M9MSM4	M9MSM4_DROME	Nopp140	Nopp140,_isoform_F	1.751	6.6295e-09	2.50426e-07
M9MSM5	M9MSM5_DROME	DAAM	Dishevelled_associated_activator_of_morphogenesis,_isoform_D	0.0603454	0.734442	0.79763
M9MSQ1	M9MSQ1_DROME	CG5004	CG5004,_isoform_B	-0.036636	0.782574	0.834746
M9NCP5	M9NCP5_DROME	CG5001	CG5001,_isoform_C	-0.137235	0.192799	0.270868
M9NCR7	M9NCR7_DROME	Oscillin	Oscillin,_isoform_E	0.513827	0.00496117	0.0121054
M9NCS7	M9NCS7_DROME	CG8086	CG8086,_isoform_G	-0.017569	0.931163	0.950668
M9NCS8	M9NCS8_DROME	Glt	Glutactin,_isoform_D	0.31526	0.0182244	0.0370236
M9NCV1	M9NCV1_DROME	fws	Four_way_stop,_isoform_D	0.102626	0.145555	0.214603
M9NCX1	M9NCX1_DROME	l(2)gl	Lethal_(2)_giant_larvae,_isoform_G	-0.151606	0.0791698	0.128721
M9NCZ5	M9NCZ5_DROME	dia	Diaphanous,_isoform_D	-0.0870302	0.252453	0.338457
M9ND00	M9ND00_DROME	Dap160	Dynamin_associated_protein_160,_isoform_D	0.307307	0.0203832	0.0407665
M9ND06	M9ND06_DROME	CG18317	CG18317,_isoform_C	-0.0892963	0.376872	0.469245
M9ND16	M9ND16_DROME	Chd1	Chromodomain-helicase-DNA-binding_protein_1,_isoform_B	-0.575211	1.75695e-05	0.000111031
M9ND17	M9ND17_DROME	mthl10	Methuselah-like_10,_isoform_C	0.847145	2.66425e-05	0.000153871
M9ND19	M9ND19_DROME	Gale	UDP-galactose_4'-epimerase,_isoform_B	0.680734	0.00110238	0.00336883
M9ND26	M9ND26_DROME	CG16758	CG16758,_isoform_G	1.92688	9.23947e-06	6.6313e-05
M9ND86	M9ND86_DROME	spel1	Spellchecker1,_isoform_D	0.643133	0.0157344	0.0326382
M9ND93	M9ND93_DROME	cp309	Cp309,_isoform_P	0.255626	0.044757	0.080021
M9ND95	M9ND95_DROME	Mhc	Myosin_heavy_chain,_isoform_U	-0.886729	0.0153737	0.0319765
M9NDA6	M9NDA6_DROME	Lasp	Lasp,_isoform_C	0.197554	0.226337	0.309589
M9NDC3	M9NDC3_DROME	Fs(2)Ket	Female_sterile_(2)_ketel,_isoform_B	-0.0816704	0.256393	0.342584
M9NDC7	M9NDC7_DROME	Cdlc2	Cytoplasmic_dynein_light_chain_2,_isoform_C	0.117591	0.381951	0.474864
M9NDD2	M9NDD2_DROME	Ac76E	Adenylyl_cyclase_76E,_isoform_B	0.450521	0.00500882	0.0121802
M9NDE0	M9NDE0_DROME	fbl	Fumble,_isoform_G	0.255317	0.0440063	0.0789997
M9NDE3	M9NDE3_DROME	CG3921	CG3921,_isoform_B	0.284116	0.109595	0.169157
M9NDG5	M9NDG5_DROME	CG12009	CG12009,_isoform_B	-0.917667	0.00730701	0.0167781
M9NDG8	M9NDG8_DROME	CG11236	CG11236,_isoform_B	0.701693	0.00374091	0.00956455
M9NDH8	M9NDH8_DROME	mRpS6	Mitochondrial_ribosomal_protein_S6,_isoform_B	-0.791531	4.66494e-06	3.90333e-05
M9NDI3	M9NDI3_DROME	Snx6	Snx6,_isoform_B	0.415502	0.000924583	0.0029223
M9NDL7	M9NDL7_DROME	Reps	Reps,_isoform_B	-0.0130659	0.851909	0.891108
M9NDM4	M9NDM4_DROME	wds	Will_die_slowly,_isoform_B	-0.0230731	0.84195	0.883151
M9NDP0	M9NDP0_DROME	CG9932	CG9932,_isoform_C	-0.181708	0.255969	0.342382
M9NDP1	M9NDP1_DROME	ctp	Cut_up,_isoform_E	-0.230621	0.131556	0.197235
M9NDR2	M9NDR2_DROME	BicD	Bicaudal_D,_isoform_B	-0.148478	0.164225	0.237429
M9NDR9	M9NDR9_DROME	CG7427	Defective_in_cullin_neddylation_protein	-0.345861	0.0381658	0.0697254
M9NDU6	M9NDU6_DROME	CkIIbeta	Casein_kinase_II_beta_subunit,_isoform_I	-0.336108	0.000771227	0.00251764
M9NDU8	M9NDU8_DROME	CG32174	Ubiquinone_biosynthesis_protein_COQ4_homolog,_mitochondrial	-0.349692	0.00125486	0.00375864
M9NDV5	M9NDV5_DROME	CG17715	CG17715,_isoform_G	-0.463572	0.000614862	0.00208439
M9NDW0	M9NDW0_DROME	Tango2	Transport_and_golgi_organization_2,_isoform_B	0.464717	0.0309281	0.0581957
M9NDW1	M9NDW1_DROME	DIP2	DISCO_interacting_protein_2,_isoform_B	0.182535	0.0467499	0.0831396
M9NDW6	M9NDW6_DROME	CG17233	CG17233,_isoform_F	-0.605826	0.0590815	0.101375
M9NDX3	M9NDX3_DROME	Top1	Topoisomerase_1,_isoform_D	-0.160537	0.0572475	0.0985984
M9NDZ4	M9NDZ4_DROME	U2af50	U2_small_nuclear_riboprotein_auxiliary_factor_50,_isoform_D	-0.0948281	0.259679	0.345963
M9NE01	M9NE01_DROME	Pp2B-14D	Protein_phosphatase_2B_at_14D,_isoform_B	-0.469102	8.14506e-06	6.04443e-05
M9NE05	M9NE05_DROME	nrm	Neuromusculin,_isoform_E	-0.774586	0.0002099	0.000846338
M9NE07	M9NE07_DROME	CG9132	CG9132,_isoform_C	0.124644	0.102352	0.159645
M9NE19	M9NE19_DROME	ewg	Erect_wing,_isoform_J	-0.0366872	0.736027	0.798595
M9NE25	M9NE25_DROME	Hmt4-20	Histone_methyltransferase_4-20,_isoform_B	-0.703068	5.07712e-06	4.17471e-05
M9NE66	M9NE66_DROME	nwk	Nervous_wreck,_isoform_B	0.761486	0.0194197	0.0391041
M9NE68	M9NE68_DROME	Hsp23	Heat_shock_protein_23,_isoform_B	0.858058	0.00363918	0.00935204
M9NE73	M9NE73_DROME	CalpB	Calpain-B,_isoform_B	-0.121635	0.178724	0.254582
M9NE89	M9NE89_DROME	Lam	Lamin,_isoform_B	-0.269154	0.182136	0.258854
M9NE98	M9NE98_DROME	CG5114	CG5114,_isoform_B	0.575462	0.000168843	0.000703372
M9NEA1	M9NEA1_DROME	stai	Stathmin,_isoform_D	-0.119977	0.652827	0.731431
M9NED8	M9NED8_DROME	rudhira	CG43154,_isoform_D	-0.172437	0.352089	0.443778
M9NEE8	M9NEE8_DROME	Rab8	Rab8,_isoform_B	-0.560885	6.44239e-06	4.98714e-05
M9NEL1	M9NEL1_DROME	CanA-14F	Calcineurin_A_at_14F,_isoform_C	-0.559111	0.00199391	0.00560885
M9NEN6	M9NEN6_DROME	CG3638	Protein_tweety_homolog	-0.0849796	0.424691	0.518379
M9NEP1	M9NEP1_DROME	Mhc	Myosin_heavy_chain,_isoform_T	-0.759286	0.000833293	0.00268363
M9NEQ1	M9NEQ1_DROME	CG9664	CG9664,_isoform_D	1.08712	3.55721e-06	3.1575e-05
M9NEQ5	M9NEQ5_DROME	CG5110	CG5110,_isoform_B	0.12467	0.120542	0.183072
M9NEQ7	M9NEQ7_DROME	Adar	Adenosine_deaminase_acting_on_RNA,_isoform_E	0.704261	6.345e-05	0.000311911
M9NEQ9	M9NEQ9_DROME	RpS10b	Ribosomal_protein_S10b,_isoform_D	-0.707474	3.2837e-05	0.000181732
M9NER9	M9NER9_DROME	CG3191	CG3191,_isoform_B	0.100117	0.41588	0.508736
M9NES6	M9NES6_DROME	trol	Terribly_reduced_optic_lobes,_isoform_AB	0.699209	0.000118863	0.000527066
M9NEU5	M9NEU5_DROME	chic	Profilin	0.147118	0.10667	0.165455
M9NEV0	M9NEV0_DROME	lid	Little_imaginal_discs,_isoform_C	-0.0851067	0.438989	0.531766
M9NEW0	M9NEW0_DROME	CG43346-RA	CG43346,_isoform_A	-0.366205	0.00496742	0.0121089
M9NEW1	M9NEW1_DROME	Mlc-c	Myosin_light_chain_cytoplasmic,_isoform_B	-0.0513376	0.755022	0.813649
M9NEW2	M9NEW2_DROME	chm	Chameau,_isoform_B	-0.129329	0.364717	0.457056
M9NEX3	M9NEX3_DROME	CG3566	CG3566,_isoform_D	0.388536	0.0200033	0.0401012
M9NEZ0	M9NEZ0_DROME	l(2)gd1	Lethal_(2)_giant_discs_1,_isoform_B	0.0135046	0.840719	0.882527
M9NF02	M9NF02_DROME	Pde1c	Pde1c,_isoform_H	-0.253911	0.078269	0.127546
M9NF13	M9NF13_DROME	CG32245	CG42540,_isoform_G	0.394471	0.0830294	0.133613
M9NF15	M9NF15_DROME	axo	Axotactin,_isoform_D	1.15572	3.37221e-06	3.0362e-05
M9NF18	M9NF18_DROME	CG2247	CG2247,_isoform_D	-0.219729	0.0401569	0.0729651
M9NF32	M9NF32_DROME	CG3793	CG3793,_isoform_B	-0.222515	0.0877447	0.139791
M9NF33	M9NF33_DROME	CG7185	CG7185,_isoform_B	-0.183779	0.0322836	0.0603845
M9NF51	M9NF51_DROME	rut	Rutabaga,_isoform_B	-0.101848	0.632719	0.713531
M9NFA7	M9NFA7_DROME	CG9086	CG9086,_isoform_B	0.0971641	0.192988	0.270981
M9NFF8	M9NFF8_DROME	Cdc42	Cdc42,_isoform_C	-0.0161293	0.840283	0.882426
M9NFH8	M9NFH8_DROME	CG9674	CG9674,_isoform_F	0.225211	0.0102589	0.0223993
M9NFL0	M9NFL0_DROME	ash1	Absent,_small,_or_homeotic_discs_1,_isoform_C	0.133248	0.423565	0.51713
M9NFM7	M9NFM7_DROME	DOR	DOR,_isoform_G	-0.162379	0.571161	0.656639
M9NFP7	M9NFP7_DROME	elav	Embryonic_lethal_abnormal_vision,_isoform_D	0.144376	0.589889	0.674006
M9NFR5	M9NFR5_DROME	yps	Ypsilon_schachtel,_isoform_B	-0.595025	0.000250751	0.00098037
M9NFW6	M9NFW6_DROME	CanB	Calcineurin_B,_isoform_B	-1.02965	4.31131e-07	6.15341e-06
M9NFZ9	M9NFZ9_DROME	CG45057	CG4893,_isoform_B	0.229547	0.133623	0.199561
M9NG39	M9NG39_DROME	Pep	Protein_on_ecdysone_puffs,_isoform_D	0.135004	0.17601	0.251785
M9NG50	M9NG50_DROME	Moe	Moesin,_isoform_L	0.0985154	0.293082	0.381957
M9NGB9	M9NGB9_DROME	mub	Mushroom-body_expressed,_isoform_H	-0.818286	0.00234683	0.00644992
M9NGF7	M9NGF7_DROME	HDAC6	HDAC6,_isoform_E	0.555428	0.000241283	0.000947774
M9NGG5	M9NGG5_DROME	futsch	Futsch,_isoform_F	0.621593	0.0313224	0.0588276
M9NGY4	M9NGY4_DROME	ZAP3	ZAP3,_isoform_E	-0.393683	0.0627809	0.106378
M9NH07	M9NH07_DROME	up	Upheld,_isoform_N	-0.716491	0.0799475	0.129566
M9NHD5	M9NHD5_DROME	CG14231	CG14231,_isoform_B	-0.245548	0.0406622	0.0736966
M9PAY6	M9PAY6_DROME	CG17078	CG17078,_isoform_D	-0.0360162	0.744921	0.805929
M9PAZ4	M9PAZ4_DROME	IA-2	IA-2_ortholog,_isoform_E	0.333032	0.282939	0.371242
M9PB12	M9PB12_DROME	CG9886	CG9886,_isoform_B	1.03475	4.23423e-05	0.000223454
M9PB19	M9PB19_DROME	CG3558	CG3558,_isoform_D	-0.237415	0.021639	0.0428856
M9PB21	M9PB21_DROME	v(2)k05816	V(2)k05816,_isoform_B	-0.0806808	0.710194	0.778193
M9PB30	M9PB30_DROME	dp	Dumpy,_isoform_Q	-0.022408	0.913869	0.936804
M9PB35	M9PB35_DROME	Cf2	Chorion_factor_2,_isoform_F	-0.0980285	0.295469	0.384668
M9PB50	M9PB50_DROME	retm	Real-time,_isoform_B	0.618694	0.00133826	0.00396754
M9PB52	M9PB52_DROME	Galt	Galactose-1-phosphate_uridylyltransferase	1.09752	3.20663e-05	0.000178604
M9PB54	M9PB54_DROME	homer	Homer,_isoform_F	-0.034495	0.737233	0.799279
M9PB59	M9PB59_DROME	Ndae1	Na[+]-driven_anion_exchanger_1,_isoform_D	0.0752848	0.739927	0.801508
M9PB60	M9PB60_DROME	Ndae1	Na[+]-driven_anion_exchanger_1,_isoform_I	0.232816	0.18586	0.262958
M9PB68	M9PB68_DROME	poe	Purity_of_essence,_isoform_B	0.339791	0.000408813	0.00147549
M9PB84	M9PB84_DROME	RpS2	Ribosomal_protein_S2,_isoform_B	-0.871993	2.79115e-06	2.67609e-05
M9PB90	M9PB90_DROME	Cand1	Cullin-associated_and_neddylation-dissociated_1,_isoform_B	-0.339763	0.000121397	0.000535468
M9PB96	M9PB96_DROME	CG6724	Ribosome_biogenesis_protein_WDR12_homolog	0.878178	1.74e-07	3.12205e-06
M9PBA6	M9PBA6_DROME	CG5446	CG5446,_isoform_B	-0.0693548	0.75971	0.817648
M9PBB3	M9PBB3_DROME	CG18507	CG18507,_isoform_D	-0.42618	0.0766002	0.125396
M9PBB5	M9PBB5_DROME	vas	Vasa,_isoform_C	1.64889	8.28088e-08	1.77035e-06
M9PBD6	M9PBD6_DROME	l(2)37Cg	Lethal_(2)_37Cg,_isoform_D	0.954552	5.59038e-07	7.55002e-06
M9PBE1	M9PBE1_DROME	CG10188	CG10188,_isoform_C	-0.26298	0.0621312	0.105455
M9PBH7	M9PBH7_DROME	Rac1	Rac1,_isoform_B	-0.152152	0.229483	0.313379
M9PBH8	M9PBH8_DROME	CG2199	CG2199,_isoform_C	0.325822	0.00124968	0.0037483
M9PBH9	M9PBH9_DROME	CG12084	CG12084,_isoform_B	0.0607704	0.487759	0.579452
M9PBI3	M9PBI3_DROME	drpr	Draper,_isoform_F	0.295137	0.0483498	0.0854412
M9PBI5	M9PBI5_DROME	alpha-Spec	Alpha_spectrin,_isoform_C	0.142508	0.158941	0.230852
M9PBJ1	M9PBJ1_DROME	zormin	Zormin,_isoform_J	-0.00146586	0.990463	0.993597
M9PBK1	M9PBK1_DROME	pgant6	FI21231p1	0.162544	0.375808	0.468269
M9PBK5	M9PBK5_DROME	RpLP1	Ribosomal_protein_LP1,_isoform_B	-0.75701	2.01258e-05	0.000123007
M9PBK6	M9PBK6_DROME	prominin-like	Prominin-like,_isoform_F	0.33731	0.00299693	0.00794125
M9PBL3	M9PBL3_DROME	Hsp83	Heat_shock_protein_83,_isoform_B	-0.369856	0.000634283	0.00213296
M9PBM0	M9PBM0_DROME	kraken	Kraken,_isoform_B	-0.184126	0.259372	0.345737
M9PBM1	M9PBM1_DROME	U2af38	U2_small_nuclear_riboprotein_auxiliary_factor_38,_isoform_B	-0.0919258	0.280597	0.368843
M9PBM3	M9PBM3_DROME	Atg4	Autophagy-specific_gene_4,_isoform_B	-0.0624419	0.408382	0.501739
M9PBM4	M9PBM4_DROME	CG14977	CG14977,_isoform_B	0.150843	0.373085	0.465568
M9PBN2	M9PBN2_DROME	NLaz	Neural_lazarillo,_isoform_B	2.01614	9.88537e-07	1.16857e-05
M9PBN7	M9PBN7_DROME	cpb	Capping_protein_beta,_isoform_B	-0.483023	0.000555961	0.00191574
M9PBP5	M9PBP5_DROME	Der-1	Derlin-1,_isoform_B	-0.0918941	0.359475	0.451614
M9PBQ0	M9PBQ0_DROME	Dhc64C	Dynein_heavy_chain_64C,_isoform_D	-0.452027	8.4993e-06	6.26106e-05
M9PBQ4	M9PBQ4_DROME	AIF	Apoptosis_inducing_factor,_isoform_C	0.0219477	0.814208	0.861901
M9PBR6	M9PBR6_DROME	CG33523	CG33523,_isoform_F	0.561844	0.00503846	0.0122464
M9PBS9	M9PBS9_DROME	CG10103	CG10103,_isoform_F	-0.121145	0.148898	0.218753
M9PBU2	M9PBU2_DROME	Rac2	Rac2,_isoform_B	0.00341676	0.981273	0.98684
M9PBU4	M9PBU4_DROME	CG3077	CG3077,_isoform_B	0.0141679	0.884398	0.916505
M9PBV1	M9PBV1_DROME	Hn	Henna,_isoform_C	1.29791	1.17412e-05	8.01649e-05
M9PBV2	M9PBV2_DROME	NTPase	NTPase,_isoform_F	-0.0656814	0.615789	0.698516
M9PBV5	M9PBV5_DROME	syd	Sunday_driver,_isoform_I	-0.107263	0.264247	0.351026
M9PBV6	M9PBV6_DROME	CG7927	CG7927,_isoform_B	-0.264921	0.0395737	0.0720878
M9PBV8	M9PBV8_DROME	Eogt	EGF-domain_O-GlcNAc_transferase,_isoform_B	-0.191706	0.0868665	0.138765
M9PBW0	M9PBW0_DROME	Ubc12	Ubiquitin_conjugating_enzyme_12,_isoform_B	-0.26227	0.00854622	0.0191937
M9PBX3	M9PBX3_DROME	CG31689	CG31689,_isoform_H	0.871745	3.64724e-05	0.000197667
M9PBZ9	M9PBZ9_DROME	eIF-4E	Eukaryotic_initiation_factor_4E,_isoform_H	-0.0514117	0.552086	0.639834
M9PC05	M9PC05_DROME	Plc21C	Phospholipase_C_at_21C,_isoform_G	-0.242587	0.113594	0.173887
M9PC18	M9PC18_DROME	CG3326-RA	CG3326,_isoform_B	0.13347	0.171529	0.24657
M9PC25	M9PC25_DROME	Saf6	SAGA_factor-like_TAF6,_isoform_B	-0.14189	0.195114	0.273527
M9PC64	M9PC64_DROME	fd68A	Forkhead_domain_68A,_isoform_P	-0.699012	0.0207018	0.0412722
M9PC65	M9PC65_DROME	CG34126	CG34126,_isoform_D	0.120622	0.209723	0.291305
M9PC68	M9PC68_DROME	CG6175	CG6175,_isoform_D	0.35446	0.0117623	0.0251784
M9PC73	M9PC73_DROME	Liprin-alpha	Liprin-alpha,_isoform_C	-0.00897008	0.946567	0.962078
M9PC74	M9PC74_DROME	CG31650	CG31650,_isoform_G	-0.999739	3.29147e-06	2.99179e-05
M9PC85	M9PC85_DROME	x16	X16,_isoform_B	0.0179333	0.929523	0.949486
M9PC89	M9PC89_DROME	snRNP-U1-70K	Small_ribonucleoprotein_particle_U1_subunit_70K,_isoform_B	-0.166032	0.134518	0.200585
M9PC96	M9PC96_DROME	RhoGAP68F	RhoGAP68F,_isoform_D	0.210841	0.139376	0.206739
M9PC99	M9PC99_DROME	gho	Ghost,_isoform_C	-0.170032	0.120394	0.182902
M9PCA6	M9PCA6_DROME	Gal	Beta_galactosidase,_isoform_B	0.6559	0.00367178	0.00941175
M9PCA7	M9PCA7_DROME	Ncc69	Sodium_chloride_cotransporter_69,_isoform_C	0.267928	0.144062	0.212689
M9PCB7	M9PCB7_DROME	tral	Trailer_hitch,_isoform_G	-0.403446	0.0381429	0.069709
M9PCC1	M9PCC1_DROME	Rack1	Receptor_of_activated_protein_kinase_C_1,_isoform_C	-0.624271	0.000148451	0.000631513
M9PCC3	M9PCC3_DROME	MED20	Mediator_complex_subunit_20,_isoform_B	-0.0854302	0.29875	0.388236
M9PCC4	M9PCC4_DROME	Sap130	Sin3A-associated_protein_130,_isoform_G	0.037406	0.762357	0.819619
M9PCC5	M9PCC5_DROME	Cyp309a1	Cyp309a1,_isoform_C	1.3659	4.97421e-05	0.000255787
M9PCC6	M9PCC6_DROME	CG11329	CG11329,_isoform_B	1.78492	1.13624e-08	3.82172e-07
M9PCE0	M9PCE0_DROME	Pgk	Phosphoglycerate_kinase	-2.80858	2.5819e-11	5.87581e-09
M9PCE5	M9PCE5_DROME	Hml	Hemolectin,_isoform_B	-0.563933	0.0653585	0.110225
M9PCE7	M9PCE7_DROME	CG13784	CG13784,_isoform_E	0.485231	0.0294703	0.0559769
M9PCE8	M9PCE8_DROME	Acer	Angiotensin-converting_enzyme-related,_isoform_B	0.243622	0.138512	0.205518
M9PCF6	M9PCF6_DROME	lilli	Lilliputian,_isoform_H	-0.414087	0.000248677	0.000973016
M9PCF8	M9PCF8_DROME	CG32138	CG32138,_isoform_D	0.546083	0.00205762	0.00575264
M9PCH8	M9PCH8_DROME	baf	Barrier_to_autointegration_factor,_isoform_B	0.998022	0.000108706	0.000490691
M9PCI2	M9PCI2_DROME	NHP2	NHP2,_isoform_B	0.865553	2.40256e-08	6.52458e-07
M9PCI5	M9PCI5_DROME	CG8475	CG8475,_isoform_C	-0.478533	0.000158299	0.000667193
M9PCI6	M9PCI6_DROME	ed	Echinoid,_isoform_C	-0.269974	0.323561	0.412581
M9PCK6	M9PCK6_DROME	Sps2	Selenophosphate_synthetase_2,_isoform_C	-0.337385	0.0102362	0.0223593
M9PCK7	M9PCK7_DROME	CG13090	Adenylyltransferase_and_sulfurtransferase_MOCS3	0.248071	0.00690838	0.0159796
M9PCL4	M9PCL4_DROME	CG3887	CG3887,_isoform_B	-0.121511	0.208936	0.290292
M9PCL5	M9PCL5_DROME	mRpS7	Mitochondrial_ribosomal_protein_S7,_isoform_B	-0.571251	0.000671168	0.00223752
M9PCL6	M9PCL6_DROME	Eip71CD	Ecdysone-induced_protein_28/29kD,_isoform_G	0.0159585	0.882239	0.915072
M9PCM4	M9PCM4_DROME	TfIIB	Transcription_factor_IIB,_isoform_B	-0.0188726	0.838145	0.880376
M9PCN6	M9PCN6_DROME	numb	Numb,_isoform_D	0.425879	0.0438083	0.078689
M9PCP3	M9PCP3_DROME	CG9044	CG9044,_isoform_C	0.222418	0.0170881	0.0351272
M9PCQ1	M9PCQ1_DROME	Cpr	NADPH--cytochrome_P450_reductase	0.220959	0.128974	0.194118
M9PCQ8	M9PCQ8_DROME	chico	Chico,_isoform_B	0.158204	0.140765	0.208491
M9PCV1	M9PCV1_DROME	Edem2	Edem2,_isoform_B	0.0879842	0.41544	0.508395
M9PCW5	M9PCW5_DROME	Bsg	Basigin,_isoform_J	-0.362351	0.000180915	0.000743188
M9PCW9	M9PCW9_DROME	CG32196	CG32196,_isoform_C	-0.50884	0.000217791	0.000871163
M9PCY7	M9PCY7_DROME	Gbs-76A	Glycogen_binding_subunit_76A,_isoform_B	-0.463491	0.0017594	0.00503085
M9PD03	M9PD03_DROME	CG9586	CG9586,_isoform_C	-0.668178	0.0372238	0.0682527
M9PD06	M9PD06_DROME	CG8334	Ubiquitin_carboxyl-terminal_hydrolase	-0.058486	0.44337	0.535921
M9PD08	M9PD08_DROME	Elf	Ef1alpha-like_factor,_isoform_C	-0.280142	0.0207411	0.041334
M9PD09	M9PD09_DROME	CG7770	CG7770,_isoform_B	-0.491494	0.00588741	0.0139784
M9PD14	M9PD14_DROME	fln	Flightin,_isoform_B	-1.08217	0.125738	0.189692
M9PD17	M9PD17_DROME	gig	Gigas,_isoform_B	0.198762	0.0170285	0.0350242
M9PD18	M9PD18_DROME	Vha68-1	Vacuolar_H[+]_ATPase_subunit_68-1,_isoform_B	-0.50008	0.000838201	0.00269598
M9PD22	M9PD22_DROME	Cyt-c-d	Cytochrome_c_distal,_isoform_B	-1.03544	0.000611507	0.00207582
M9PD23	M9PD23_DROME	DnaJ-H	DnaJ_homolog,_isoform_C	-0.48213	0.000485948	0.0017037
M9PD26	M9PD26_DROME	Cyt-b5-r	Cytochrome_b5-related,_isoform_B	2.34736	5.75686e-07	7.71266e-06
M9PD27	M9PD27_DROME	eRF1	Eukaryotic_release_factor_1,_isoform_H	-0.107808	0.323136	0.412249
M9PD43	M9PD43_DROME	CG16865	CG16865,_isoform_B	0.761744	0.000310645	0.0011673
M9PD57	M9PD57_DROME	stc	Shuttle_craft,_isoform_D	1.20911	1.22731e-07	2.35344e-06
M9PD65	M9PD65_DROME	RanGAP	Ran_GTPase_activating_protein,_isoform_C	0.721116	1.06946e-07	2.12371e-06
M9PD73	M9PD73_DROME	Tep4	Thioester-containing_protein_4,_isoform_B	0.0207552	0.875733	0.91053
M9PD75	M9PD75_DROME	porin	Porin,_isoform_D	-0.644216	8.33712e-05	0.000392556
M9PD88	M9PD88_DROME	Atox1	Atox1,_isoform_B	0.319214	0.00909346	0.0202417
M9PD90	M9PD90_DROME	CG6509	CG6509,_isoform_D	-0.176032	0.0797209	0.129241
M9PD95	M9PD95_DROME	cact	Cactus,_isoform_E	-0.476199	0.000432964	0.00154709
M9PDA6	M9PDA6_DROME	CG2614	CG2614,_isoform_C	-0.0739404	0.485596	0.577408
M9PDB2	M9PDB2_DROME	vari	Varicose,_isoform_E	0.00326368	0.986826	0.991166
M9PDC4	M9PDC4_DROME	MESR3	Misexpression_suppressor_of_ras_3,_isoform_B	-0.378549	0.0787445	0.128196
M9PDF2	M9PDF2_DROME	swm	Second_mitotic_wave_missing,_isoform_C	-0.118339	0.446099	0.538621
M9PDF5	M9PDF5_DROME	adat	Adat,_isoform_B	-0.918762	1.06271e-06	1.23304e-05
M9PDG9	M9PDG9_DROME	CG12773	CG12773,_isoform_B	0.326694	0.0100316	0.021989
M9PDI0	M9PDI0_DROME	miple2	Miple2,_isoform_D	0.080753	0.797038	0.847653
M9PDM4	M9PDM4_DROME	PI4KIIIalpha	Phosphatidylinositol_4-kinase_III_alpha,_isoform_D	0.023269	0.77231	0.827663
M9PDM5	M9PDM5_DROME	cta	Concertina,_isoform_B	-0.134089	0.218515	0.301103
M9PDP3	M9PDP3_DROME	fon	Fondue,_isoform_D	1.57101	6.88651e-07	8.81258e-06
M9PDQ1	M9PDQ1_DROME	Top2	DNA_topoisomerase_2	-0.245772	0.139859	0.207371
M9PDQ9	M9PDQ9_DROME	CG31974	CG31974,_isoform_D	1.22377	0.000280722	0.00107804
M9PDR9	M9PDR9_DROME	Fas2	Fasciclin_2,_isoform_E	-0.0267487	0.786308	0.838194
M9PDU4	M9PDU4_DROME	mtacp1	Acyl_carrier_protein	-0.92528	2.99688e-05	0.000169362
M9PDV3	M9PDV3_DROME	CG12090	CG12090,_isoform_E	0.0715162	0.311652	0.401369
M9PDW0	M9PDW0_DROME	n-syb	N-synaptobrevin,_isoform_K	-0.241955	0.392528	0.485898
M9PDW8	M9PDW8_DROME	CG34417	CG34417,_isoform_T	0.316653	0.0130693	0.0276116
M9PDX8	M9PDX8_DROME	nrv3	Nervana_3,_isoform_E	0.95717	0.0136349	0.02871
M9PDY5	M9PDY5_DROME	Girdin	Girdin,_isoform_C	-0.077185	0.524929	0.615029
M9PDZ8	M9PDZ8_DROME	CG1530	CG42593,_isoform_B	0.0116738	0.874626	0.909567
M9PE01	M9PE01_DROME	Eip63E	Ecdysone-induced_protein_63E,_isoform_N	0.0934979	0.556606	0.643884
M9PE14	M9PE14_DROME	mRpL23	Mitochondrial_ribosomal_protein_L23,_isoform_C	-0.623654	0.00145498	0.00425733
M9PE30	M9PE30_DROME	Chd64	Chd64,_isoform_C	-0.376969	0.00391003	0.00990121
M9PE35	M9PE35_DROME	RabX6	RabX6,_isoform_B	0.153543	0.0443623	0.0794567
M9PEA0	M9PEA0_DROME	sls	Sallimus,_isoform_P	-0.360858	0.00941626	0.0207789
M9PEA6	M9PEA6_DROME	RpS21	40S_ribosomal_protein_S21	-0.6253	4.93529e-06	4.07811e-05
M9PEB6	M9PEB6_DROME	Ptp10D	Protein_tyrosine_phosphatase_10D,_isoform_I	-0.0656603	0.437469	0.530624
M9PEC5	M9PEC5_DROME	CG33232	CG33232,_isoform_E	0.138746	0.109481	0.169076
M9PEE1	M9PEE1_DROME	smid	Smallminded,_isoform_H	0.741898	5.8635e-06	4.63179e-05
M9PEF6	M9PEF6_DROME	CG3714	CG3714,_isoform_H	-0.0822812	0.424987	0.518489
M9PEF9	M9PEF9_DROME	hep	Hemipterous,_isoform_D	-0.268049	0.00918784	0.0204247
M9PEG6	M9PEG6_DROME	ZnT63C	ZnT63C,_isoform_F	-0.0487101	0.729667	0.794125
M9PEH8	M9PEH8_DROME	CG10289	CG10289,_isoform_D	-0.26625	0.00544236	0.013095
M9PEI9	M9PEI9_DROME	CG11134	Probable_methylthioribulose-1-phosphate_dehydratase	0.208357	0.0742055	0.122372
M9PEJ9	M9PEJ9_DROME	CG5989	CG5989,_isoform_B	-0.566742	0.000221555	0.000884107
M9PEL1	M9PEL1_DROME	Rop	Ras_opposite,_isoform_B	0.185348	0.0945955	0.149402
M9PEL3	M9PEL3_DROME	qm	Quemao,_isoform_C	0.114726	0.129168	0.194293
M9PEL7	M9PEL7_DROME	ImpL2	Ecdysone-inducible_gene_L2,_isoform_D	0.84823	0.000299048	0.00113476
M9PEP5	M9PEP5_DROME	CG6767	CG6767,_isoform_F	-0.0337327	0.733428	0.796874
M9PEQ4	M9PEQ4_DROME	CG8177	CG8177,_isoform_M	1.00652	0.0139596	0.0292953
M9PER1	M9PER1_DROME	Atg18	Autophagy-specific_gene_18,_isoform_E	0.240618	0.0249381	0.0485993
M9PES6	M9PES6_DROME	foi	Fear-of-intimacy,_isoform_B	-0.237306	0.0685169	0.114743
M9PET3	M9PET3_DROME	simj	Simjang,_isoform_D	0.121529	0.356074	0.447827
M9PEU5	M9PEU5_DROME	APP-BP1	Beta-Amyloid_protein_binding_protein_1,_isoform_B	0.130172	0.184324	0.261373
M9PEV2	M9PEV2_DROME	CG5087	CG5087,_isoform_B	-0.218813	0.0761023	0.124746
M9PEW8	M9PEW8_DROME	CG4452	CG4452,_isoform_E	0.498951	0.000213899	0.000858329
M9PEX7	M9PEX7_DROME	CG3408	CG3408,_isoform_B	0.104104	0.400897	0.494139
M9PEY6	M9PEY6_DROME	Rat1	Rat1,_isoform_B	-0.0761644	0.300979	0.390526
M9PEY7	M9PEY7_DROME	Atg18	Autophagy-specific_gene_18,_isoform_D	0.161496	0.0491172	0.0865538
M9PEZ2	M9PEZ2_DROME	CG10158	CG10158,_isoform_B	-0.16539	0.136382	0.202657
M9PEZ4	M9PEZ4_DROME	thoc6	Thoc6,_isoform_B	0.164825	0.125767	0.189692
M9PF14	M9PF14_DROME	tral	Trailer_hitch,_isoform_C	-0.0465939	0.775108	0.829247
M9PF16	M9PF16_DROME	beta-Spec	Beta_spectrin,_isoform_B	0.166007	0.108861	0.168367
M9PF24	M9PF24_DROME	Klc	Kinesin_light_chain,_isoform_B	-0.307713	0.00095907	0.00301148
M9PF36	M9PF36_DROME	CG3529	CG3529,_isoform_C	0.282068	0.00790769	0.0180255
M9PF40	M9PF40_DROME	l(3)01239	Lethal_(3)_01239,_isoform_B	0.240207	0.0264763	0.0511406
M9PF57	M9PF57_DROME	CG33205	CG43897,_isoform_M	0.720584	0.000595049	0.00202817
M9PF60	M9PF60_DROME	Meics	Meiotic_central_spindle,_isoform_B	0.996571	8.55462e-07	1.04317e-05
M9PF68	M9PF68_DROME	Klp68D	Kinesin-like_protein_at_68D,_isoform_B	-0.0257975	0.876966	0.911382
M9PF88	M9PF88_DROME	SuUR	Suppressor_of_Under-Replication,_isoform_B	0.530449	3.56787e-05	0.000194204
M9PF96	M9PF96_DROME	Pmp70	Pmp70,_isoform_C	0.5904	0.000309112	0.00116241
M9PFB5	M9PFB5_DROME	alien	Alien,_isoform_D	-0.0102453	0.896458	0.924087
M9PFE4	M9PFE4_DROME	Hip14	Palmitoyltransferase	0.15118	0.160746	0.233003
M9PFE5	M9PFE5_DROME	CG10732	CG10732,_isoform_D	-0.526021	0.000284555	0.00108881
M9PFF0	M9PFF0_DROME	RpL13	60S_ribosomal_protein_L13	-0.833368	1.11146e-05	7.70204e-05
M9PFG1	M9PFG1_DROME	l(3)72Dn	Lethal_(3)_72Dn,_isoform_B	0.911675	3.05395e-07	4.79471e-06
M9PFM5	M9PFM5_DROME	brm	Brahma,_isoform_F	-0.0863932	0.540637	0.629323
M9PFN0	M9PFN0_DROME	CG5830	CG5830,_isoform_B	0.456067	0.000467866	0.00164951
M9PFN1	M9PFN1_DROME	rept	Reptin,_isoform_B	0.203409	0.0537052	0.0937182
M9PFR6	M9PFR6_DROME	mbf1	Multiprotein_bridging_factor_1,_isoform_E	0.197055	0.542604	0.631028
M9PFR8	M9PFR8_DROME	CG32164	CG32164,_isoform_B	-0.572123	0.000690234	0.00228743
M9PFS0	M9PFS0_DROME	Tor	Target_of_rapamycin,_isoform_B	-0.134307	0.0758931	0.124604
M9PFS8	M9PFS8_DROME	CG9705	CG9705,_isoform_C	-0.234161	0.0261705	0.0506629
M9PFT2	M9PFT2_DROME	CG3634	CG3634,_isoform_B	0.0902297	0.536466	0.626209
M9PFT9	M9PFT9_DROME	CycT	Cyclin_T,_isoform_C	2.07992	1.05835e-05	7.39517e-05
M9PFU7	M9PFU7_DROME	MED10	Mediator_complex_subunit_10,_isoform_C	-0.431634	0.000654363	0.00218876
M9PFV8	M9PFV8_DROME	rgn	Regeneration,_isoform_B	0.0405796	0.840447	0.882426
M9PFV9	M9PFV9_DROME	TfIIS	RNA_polymerase_II_elongation_factor,_isoform_B	-0.0492746	0.510544	0.601259
M9PFY2	M9PFY2_DROME	CG6479	CG6479,_isoform_C	0.731582	0.000377456	0.00138419
M9PFZ1	M9PFZ1_DROME	Nopp140	Nopp140,_isoform_E	0.477405	0.0329871	0.0614715
M9PFZ6	M9PFZ6_DROME	Act79B	Actin_79B,_isoform_B	-0.854095	0.087246	0.139195
M9PG09	M9PG09_DROME	CG11370	CG11370,_isoform_B	-0.140667	0.694056	0.764847
M9PG20	M9PG20_DROME	CG3680	CG3680,_isoform_C	-0.0542397	0.602108	0.6854
M9PG22	M9PG22_DROME	Arf79F	ADP_ribosylation_factor_79F,_isoform_J	0.50246	7.37481e-05	0.00035391
M9PG40	M9PG40_DROME	CG40045	CG40045,_isoform_D	-0.0930842	0.262482	0.349142
M9PG43	M9PG43_DROME	trc	Tricornered,_isoform_B	-0.433108	0.00103418	0.00319933
M9PG47	M9PG47_DROME	RpS26	Ribosomal_protein_S26,_isoform_D	-0.418586	0.00302684	0.00801202
M9PG50	M9PG50_DROME	Cdk12	Cdk12,_isoform_C	-0.740045	2.45279e-05	0.000144634
M9PG62	M9PG62_DROME	Rpn3	Regulatory_particle_non-ATPase_3,_isoform_B	0.12522	0.0761039	0.124746
M9PG72	M9PG72_DROME	su(w[a])	Suppressor_of_white-apricot,_isoform_K	-0.166076	0.197876	0.276916
M9PG76	M9PG76_DROME	RpLP0	Ribosomal_protein_LP0,_isoform_B	-0.635587	9.49882e-05	0.000437817
M9PG81	M9PG81_DROME	CG11448	CG11448,_isoform_B	0.227873	0.0457777	0.0817006
M9PG98	M9PG98_DROME	Edem1	Edem1,_isoform_E	-0.116198	0.206462	0.28757
M9PGB6	M9PGB6_DROME	CG7519	CG7519,_isoform_B	-0.256502	0.0541849	0.0944362
M9PGB8	M9PGB8_DROME	CG4293	CG4293,_isoform_E	0.0668865	0.348698	0.440387
M9PGC4	M9PGC4_DROME	sgg	Shaggy,_isoform_P	-0.525101	0.00282628	0.00756486
M9PGC5	M9PGC5_DROME	Wnk	Wnk,_isoform_E	-0.250503	0.00123933	0.00371946
M9PGE3	M9PGE3_DROME	Syn1	Syntrophin-like_1,_isoform_C	0.0692701	0.579912	0.665026
M9PGF7	M9PGF7_DROME	Ten-m	Tenascin_major,_isoform_E	0.422261	0.0125807	0.0266915
M9PGG4	M9PGG4_DROME	arm	Armadillo,_isoform_F	-0.058343	0.773271	0.828516
M9PGG7	M9PGG7_DROME	CG11596	CG11596,_isoform_D	-0.424334	0.00103228	0.00319673
M9PGH3	M9PGH3_DROME	Cht3	Chitinase_3,_isoform_B	-0.707119	0.0238129	0.0467145
M9PGI3	M9PGI3_DROME	PpV	Protein_phosphatase_V,_isoform_B	0.0116673	0.879495	0.91343
M9PGI7	M9PGI7_DROME	CG7028	CG7028,_isoform_B	0.0275299	0.692157	0.762922
M9PGK3	M9PGK3_DROME	CG33692	CG43736,_isoform_I	-0.0947746	0.445249	0.537724
M9PGL2	M9PGL2_DROME	CG11412	CG11412,_isoform_D	-0.657471	2.13791e-06	2.1655e-05
M9PGL7	M9PGL7_DROME	Tom40	Translocase_of_outer_membrane_40,_isoform_C	-0.498553	0.00409009	0.0102814
M9PGQ6	M9PGQ6_DROME	Bx42	Bx42,_isoform_B	-0.402068	0.00281072	0.00752721
M9PGS2	M9PGS2_DROME	usp	Ultraspiracle,_isoform_B	-0.27243	0.00282797	0.00756534
M9PGW0	M9PGW0_DROME	ogre	Innexin	0.261453	0.0996717	0.155997
M9PGW8	M9PGW8_DROME	bif	Bifocal,_isoform_D	0.373397	0.190591	0.26814
M9PGX7	M9PGX7_DROME	CG1140	Succinyl-CoA:3-ketoacid-coenzyme_A_transferase	0.0377345	0.820527	0.866581
M9PGZ8	M9PGZ8_DROME	Smr	Smrter,_isoform_G	-0.0278365	0.837347	0.879999
M9PH10	M9PH10_DROME	comt	Comatose,_isoform_B	0.645058	0.00127709	0.00381458
M9PH13	M9PH13_DROME	CG15743	CG15743,_isoform_B	0.447493	0.0101342	0.0221884
M9PH19	M9PH19_DROME	msn	Misshapen,_isoform_F	0.299148	0.0116569	0.0249886
M9PH32	M9PH32_DROME	mei-P26	Mei-P26,_isoform_C	-0.133763	0.317517	0.406649
M9PH35	M9PH35_DROME	CtsB1	Cathepsin_B1,_isoform_B	0.641276	0.000124473	0.000546158
M9PH59	M9PH59_DROME	RpL37a	Ribosomal_protein_L37	-0.749996	0.000684301	0.00227076
M9PH73	M9PH73_DROME	sog	Dorsal-ventral_patterning_protein_Sog	-0.282915	0.157043	0.228476
M9PH85	M9PH85_DROME	CG2061	CG2061,_isoform_D	-0.108423	0.331882	0.421907
M9PH99	M9PH99_DROME	Gad1	Glutamic_acid_decarboxylase_1,_isoform_D	1.02774	0.0281298	0.0538994
M9PHB3	M9PHB3_DROME	Sxl	Sex_lethal,_isoform_Y	0.313431	0.0331707	0.061745
M9PHC2	M9PHC2_DROME	CG1299	CG1299,_isoform_B	-0.308141	0.150858	0.220965
M9PHC7	M9PHC7_DROME	CG2233	CG2233,_isoform_B	2.84827	1.68661e-08	5.10454e-07
M9PHG0	M9PHG0_DROME	RhoGAPp190	RhoGAPp190,_isoform_D	0.00575128	0.956412	0.969676
M9PHI2	M9PHI2_DROME	Aats-his	Histidyl-tRNA_synthetase,_isoform_C	-0.103862	0.375685	0.468231
M9PHI7	M9PHI7_DROME	CG5537	CG5537,_isoform_B	0.893062	6.92241e-06	5.2298e-05
M9PHK2	M9PHK2_DROME	Tao	Tao,_isoform_I	-0.487984	2.01201e-05	0.000123007
M9PHL0	M9PHL0_DROME	e(y)3	Enhancer_of_yellow_3,_isoform_B	0.0285388	0.815873	0.863117
M9PHM6	M9PHM6_DROME	RpL18	60S_ribosomal_protein_L18	-0.712907	5.83208e-06	4.62137e-05
M9PHP6	M9PHP6_DROME	CG32521	CG32521,_isoform_G	0.551384	0.0237922	0.0466922
M9PHP7	M9PHP7_DROME	frac	Faulty_attraction,_isoform_F	1.62642	1.9881e-07	3.44421e-06
M9PHS1	M9PHS1_DROME	Clic	Chloride_intracellular_channel,_isoform_B	0.51863	0.0368661	0.0676709
M9PHS8	M9PHS8_DROME	CG9784	CG9784,_isoform_C	0.0167617	0.865668	0.902228
M9PHV1	M9PHV1_DROME	exd	Extradenticle,_isoform_D	-0.587169	0.00202739	0.00567759
M9PHV4	M9PHV4_DROME	CG42354	CG42354,_isoform_F	-0.0297385	0.821569	0.867499
M9PHY9	M9PHY9_DROME	CG6674	CG6674,_isoform_B	0.368175	0.0520537	0.091026
M9PHZ8	M9PHZ8_DROME	NijA	Ninjurin_A,_isoform_D	0.236236	0.275611	0.36324
M9PI05	M9PI05_DROME	JIL-1	JIL-1,_isoform_C	-0.226869	0.268171	0.355485
M9PI14	M9PI14_DROME	NAA20	CG14222,_isoform_B	-0.289424	0.0257942	0.050037
M9PI17	M9PI17_DROME	CG6084	CG6084,_isoform_D	0.174108	0.294887	0.384094
M9PI40	M9PI40_DROME	CG10660	CG10660,_isoform_B	0.400929	0.0124717	0.0264714
M9PI58	M9PI58_DROME	stwl	Stonewall,_isoform_B	0.147723	0.242671	0.327824
M9PI59	M9PI59_DROME	shd	Shade,_isoform_D	0.204754	0.1645	0.23769
M9PI73	M9PI73_DROME	mib1	Mind_bomb_1,_isoform_B	0.0725564	0.403242	0.49642
M9PI74	M9PI74_DROME	th	Thread,_isoform_D	-0.417831	0.0015476	0.00450472
M9PI82	M9PI82_DROME	Mo25	Mo25,_isoform_B	-0.53621	1.39549e-05	9.1766e-05
M9PI96	M9PI96_DROME	CG18135	CG18135,_isoform_E	2.3396	3.52462e-07	5.25113e-06
M9PI97	M9PI97_DROME	MESR6	Misexpression_suppressor_of_ras_6,_isoform_B	-0.878265	3.28597e-07	5.01647e-06
M9PIC3	M9PIC3_DROME	CG4825	CG4825,_isoform_B	-0.895985	0.000302717	0.00114522
M9PIG4	M9PIG4_DROME	Glg1	Golgi_complex-localized_glycoprotein_1,_isoform_B	0.137011	0.117991	0.179835
M9PIG8	M9PIG8_DROME	Rpn10	Proteasome_54kD_subunit,_isoform_B	0.091153	0.225531	0.308823
M9PIM0	M9PIM0_DROME	RpL10	Ribosomal_protein_L10,_isoform_E	-0.835211	0.00657939	0.0153245
M9PIU6	M9PIU6_DROME	z	Zeste,_isoform_C	-0.139326	0.534926	0.624564
M9PJJ5	M9PJJ5_DROME	CG10352	CG10352,_isoform_B	0.944322	0.00293591	0.00780837
M9PJM2	M9PJM2_DROME	HDAC4	HDAC4,_isoform_I	-0.064369	0.411254	0.504227
M9PJN7	M9PJN7_DROME	l(1)G0136	Lethal_(1)_G0136,_isoform_B	-0.620721	0.00178168	0.00507722
M9PJN8	M9PJN8_DROME	Gapdh2	Glyceraldehyde_3_phosphate_dehydrogenase_2,_isoform_C	-1.39615	3.00408e-08	7.70025e-07
O01382	ICE_DROME	Ice	Caspase	0.394362	0.00104418	0.00321641
O01666	ATPG_DROME	ATPsyn-gamma	ATP_synthase_subunit_gamma,_mitochondrial	-0.649052	0.000241164	0.000947774
O02193	MOF_DROME	mof	Males-absent_on_the_first_protein	-0.34849	0.014174	0.0297081
O02195	EIF3I_DROME	Trip1	Eukaryotic_translation_initiation_factor_3_subunit_I	-0.204892	0.0228833	0.0450139
O02373	UGDH_DROME	sgl	UDP-glucose_6-dehydrogenase	-0.0961072	0.649129	0.728538
O02649	CH60_DROME	Hsp60	60_kDa_heat_shock_protein,_mitochondrial	-0.785754	3.21281e-05	0.000178692
O15943	CADN_DROME	CadN	Neural-cadherin	-0.220657	0.186271	0.263465
O15971	O15971_DROME	Rab10	LD39986p	-0.427887	0.000515788	0.00179454
O16129	SYFM_DROME	Aats-phe	Probable_phenylalanine--tRNA_ligase,_mitochondrial	-0.903674	0.000216152	0.000865987
O16158	O16158_DROME	Scp2	Calcium-binding_protein	0.802778	0.000533908	0.00184863
O16797	RL3_DROME	RpL3	60S_ribosomal_protein_L3	-0.563151	0.00011681	0.000519798
O17432	O17432_DROME	Cdk9	Cyclin-dependent_kinase_9	-0.352109	0.000251428	0.000981487
O17452	O17452_DROME	Peritrophin-A	LD20793p	-0.0849864	0.585394	0.669631
O17468	HIRA_DROME	Hira	Protein_HIRA_homolog	0.195091	0.0354184	0.0654921
O18332	O18332_DROME	Rab1	FI01544p	-0.400983	0.000620492	0.0020964
O18333	O18333_DROME	Rab2	GH01619p	-0.181417	0.083237	0.133861
O18334	RAB6_DROME	Rab6	Ras-related_protein_Rab6	-0.0159384	0.863144	0.90061
O18335	O18335_DROME	Rab11	Drab11	-0.424733	0.0285526	0.0545637
O18336	O18336_DROME	Rab14	MIP20481p	0.416007	0.000112412	0.000505152
O18339	O18339_DROME	Rab19	RE48347p	-0.701465	4.19004e-06	3.59807e-05
O18373	SPS1_DROME	SelD	Selenide,_water_dikinase	-0.0777728	0.390064	0.483275
O18399	O18399_DROME	0	EG:152A3.5_protein_(Fbgn0003116	0.248624	0.0113607	0.0244542
O18404	HCD2_DROME	scu	3-hydroxyacyl-CoA_dehydrogenase_type-2	-0.335231	0.0328799	0.0613173
O18405	SURF4_DROME	Surf4	Surfeit_locus_protein_4_homolog	0.217955	0.0171216	0.0351815
O18408	AMYR_DROME	Amyrel	Alpha-amylase-related_protein	2.58061	3.18128e-05	0.000177586
O18413	PRS8_DROME	Rpt6	26S_protease_regulatory_subunit_8	0.0369968	0.613001	0.695982
O18645	O18645_DROME	SNF1A	EG:132E8.2_protein	-0.45646	0.000146942	0.000626686
O18680	O18680_DROME	Alas	5-aminolevulinate_synthase	-2.59389	2.47043e-09	1.20499e-07
O44226	O44226_DROME	Elongin-B	Elongin_B	-0.437891	0.00165898	0.00477634
O44342	WBL_DROME	wbl	Protein_windbeutel	-0.109695	0.597069	0.680507
O44386-2	ITA3_DROME	scb	Isoform_A_of_Integrin_alpha-PS3	0.264619	0.0206522	0.0411896
O44434	O44434_DROME	qkr58E-3	QKR58E-3	0.797013	3.16474e-05	0.000177056
O46037	VINC_DROME	Vinc	Vinculin	-0.104277	0.378727	0.471205
O46048	O46048_DROME	east	EG:133E12.4_protein	0.191077	0.33628	0.426634
O46050	O46050_DROME	Nmd3	EG:152A3.1_protein	0.397452	0.0034636	0.00901146
O46052	O46052_DROME	EG:152A3.3	CG3630,_isoform_A	2.77419	3.9968e-09	1.77321e-07
O46067	O46067_DROME	EG:25E8.1	CG2918,_isoform_A	-0.0850204	0.394336	0.487246
O46072	KZ_DROME	kz	Probable_ATP-dependent_RNA_helicase_kurz	1.44423	4.54331e-10	3.45842e-08
O46079	O46079_DROME	EG:39E1.2	CG3587	-0.0428138	0.791797	0.84333
O46084	PGAM5_DROME	Pgam5	Serine/threonine-protein_phosphatase_Pgam5,_mitochondrial	-0.181508	0.0137972	0.0290151
O46085	O46085_DROME	Pex5	GH08708p	-0.186383	0.244706	0.330057
O46094	O46094_DROME	Ocrl	EG:86E4.5_protein	0.149657	0.108393	0.167817
O46102	O46102_DROME	fs(1)N	CG11418,_isoform_A	-0.321669	0.0196899	0.0395689
O46106	NOI_DROME	noi	Splicing_factor_3A_subunit_3	0.276434	0.00525944	0.0127097
O46307	O46307_DROME	fs(1)N	CG11417	0.935431	1.10943e-08	3.76607e-07
O46339	HTH_DROME	hth	Homeobox_protein_homothorax	-0.745421	0.0342642	0.063592
O61305	DDX19_DROME	Dbp80	DEAD-box_helicase_Dbp80	-0.00979024	0.929057	0.949274
O61345	PEN_DROME	pen	Protein_penguin	1.54705	2.9259e-11	5.87581e-09
O61348	O61348_DROME	bbx	Bobby_sox	-0.955053	0.000386855	0.00141247
O61360	O61360_DROME	crol	CROL_ALPHA	0.0296505	0.908519	0.932652
O61443	MK14B_DROME	p38b	Mitogen-activated_protein_kinase_14B	-0.482015	3.00116e-06	2.80257e-05
O61444	O61444_DROME	Mkk4	MAP_kinase_kinase_4,_isoform_A	-0.0627729	0.437739	0.530823
O61491	FLOT1_DROME	Flo-1	Flotillin-1	-0.295336	0.00117455	0.00355692
O61602	O61602_DROME	apt	Apontic	0.323288	0.0339683	0.0630893
O61604	O61604_DROME	Fim	Fimbrin	0.130038	0.295637	0.384788
O61613	NMT_DROME	Nmt	Glycylpeptide_N-tetradecanoyltransferase	-0.51068	6.66665e-05	0.000326127
O61722	O61722_DROME	PRL-1	PRL-1,_isoform_A	-0.261951	0.00475759	0.0116824
O62526	O62526_DROME	Ant2	ADP/ATP_translocase	0.223392	0.106544	0.165311
O62530	O62530_DROME	AP-2mu	AP-50,_isoform_A	-0.175592	0.0675484	0.113324
O62531	O62531_DROME	AP-1mu	AP-47	0.00192465	0.97819	0.985053
O62602	O62602_DROME	lic	Licorne	0.297633	0.00905917	0.020178
O62609	O62609_DROME	Med	LD22279p	-0.216832	0.0769762	0.125929
O62619	KPYK_DROME	PyK	Pyruvate_kinase	-1.54646	1.41355e-08	4.33029e-07
O62621	COPB2_DROME	beta'Cop	Coatomer_subunit_beta'	0.00166143	0.986588	0.991125
O76206	RIFK_DROME	anon-84Ea	Putative_riboflavin_kinase	0.431159	0.00564161	0.0135067
O76324	DCO_DROME	dco	Discs_overgrown_protein_kinase	-0.284791	0.0149592	0.0312236
O76454	PHS_DROME	Pcd	Pterin-4-alpha-carbinolamine_dehydratase	0.722408	4.78944e-05	0.000248319
O76462	O76462_DROME	Bem46	Bem46	0.240518	0.0204593	0.0408861
O76464	NFT1_DROME	NitFhit	Nitrilase_and_fragile_histidine_triad_fusion_protein_NitFhit	-0.335908	0.00647685	0.0151281
O76511	TYSY_DROME	Ts	Thymidylate_synthase	0.362715	0.0150085	0.0313134
O76513	O76513_DROME	CycH	Cyclin_H	0.293532	0.0601856	0.102953
O76521	O76521_DROME	Kap-alpha1	Importin_subunit_alpha	-0.0283038	0.746882	0.807301
O76742	O76742_DROME	Rab7	CG5915_protein	0.0163756	0.865738	0.902228
O76752	O76752_DROME	Sptr	CG12117-PA	0.978851	6.04633e-06	4.73668e-05
O76767	ERD2_DROME	KdelR	ER_lumen_protein_retaining_receptor	0.210338	0.278929	0.366939
O76861	O76861_DROME	CG2685-RA	CG2685	-0.320499	0.000341936	0.00126851
O76863	O76863_DROME	eIF2B-beta	EG:100G10.3_protein	0.196669	0.0140668	0.029508
O76874	O76874_DROME	EG:125H10.1	CG3777,_isoform_A	-0.176236	0.5821	0.666926
O76877	O76877_DROME	EG:132E8.3	CG3719	0.425528	0.00168536	0.00484395
O76895	O76895_DROME	arg	Arginase	1.37551	1.92665e-05	0.000119795
O76902	O76902_DROME	rush	EG:80H7.5_protein	0.0562378	0.519225	0.609483
O76912	O76912_DROME	crm	CG2701	0.354274	0.00941751	0.0207789
O76928	O76928_DROME	cm	Carmine,_isoform_A	0.145438	0.0513583	0.0900608
O76932	PP4C_DROME	Pp4-19C	Serine/threonine-protein_phosphatase_4_catalytic_subunit	-0.819445	3.1511e-07	4.88615e-06
O76994	O76994_DROME	Ip259	GM13959p	1.18365	6.2278e-09	2.4068e-07
O77051	E2F2_DROME	E2f2	Transcription_factor_E2F2	-0.699224	1.83856e-05	0.000114744
O77062	O77062_DROME	Eaat1	Excitatory_amino_acid_transporter_1,_isoform_A	0.915557	0.000422901	0.00152004
O77134	O77134_DROME	c550	9_kD_basic_protein	-0.778196	0.00621438	0.0145893
O77259	O77259_DROME	mod(r)	EG:115C2.5_protein	0.0802954	0.426875	0.520286
O77264	RTCA_DROME	CG4061	RNA_3'-terminal_phosphate_cyclase	-0.991903	1.11615e-06	1.28613e-05
O77277	TORS_DROME	Torsin	Torsin-like_protein	0.357148	0.00202644	0.00567759
O77410	EIF3E_DROME	eIF3-S6	Eukaryotic_translation_initiation_factor_3_subunit_E	-0.433084	0.000704829	0.00232353
O77425	O77425_DROME	Dredd	CG13369	0.896119	5.1066e-06	4.19209e-05
O77430	O77430_DROME	skpA	EG:115C2.4_protein	-0.580567	2.46746e-06	2.41124e-05
O77434	O77434_DROME	Sec22	EG:34F3.8_protein	0.408998	0.000399776	0.00145226
O77436	O77436_DROME	EG:34F3.5	CG13360	1.70206	0.000681482	0.00226439
O77477	O77477_DROME	CG4882	CG4882	-0.483986	0.00104798	0.00322615
O96299	O96299_DROME	Sodh-2	LD47736p	-0.614492	0.00042891	0.00153676
O96539	ATE1_DROME	Ate1	Arginyl-tRNA--protein_transferase_1	0.0897159	0.324195	0.41318
O96539-4	ATE1_DROME	Ate1	Isoform_C_of_Arginyl-tRNA--protein_transferase_1	-0.0914648	0.382849	0.475564
O96553	C1TC_DROME	pug	C-1-tetrahydrofolate_synthase,_cytoplasmic	1.75576	5.22342e-06	4.27296e-05
O96651	TOP3B_DROME	Top3beta	DNA_topoisomerase_3-beta	-0.0797201	0.243868	0.329176
O96660	O96660_DROME	Smox	LD15813p	0.192296	0.0142641	0.0298595
O96676	O96676_DROME	CBP	BcDNA.GH12350	-0.425082	0.0498442	0.0876812
O96689	O96689_DROME	vtd	FI11703p	-0.12026	0.415224	0.508306
O96692	O96692_DROME	Rap2l	RE63021p	0.0331051	0.672597	0.746109
O96824	O96824_DROME	EG:131F2.3	CG14812,_isoform_A	0.0989003	0.258046	0.344427
O96827	EF1B_DROME	Ef1beta	Probable_elongation_factor_1-beta	-1.85498	1.02007e-09	6.48716e-08
O96838	FYV1_DROME	fab1	Putative_1-phosphatidylinositol_3-phosphate_5-kinase	0.200566	0.0079517	0.0181012
O96880	O96880_DROME	TfIIEalpha	GH11150p	0.501648	0.00118753	0.00358542
O97061	O97061_DROME	Ccp84Ad	Ccp84Ad	-0.473447	0.198858	0.278136
O97062	O97062_DROME	Ccp84Ae	Ccp84Ae	-0.645118	0.0719081	0.119391
O97063	O97063_DROME	Ccp84Af	Ccp84Af	-1.4403	6.70616e-06	5.12385e-05
O97064	O97064_DROME	Ccp84Ag	Ccp84Ag	-0.348663	0.344799	0.436451
O97066	O97066_DROME	twr	GM04682p	0.0278032	0.764054	0.820773
O97102	O97102_DROME	smt3	LD07775p	-0.332812	0.0981734	0.154084
O97125	HSP68_DROME	Hsp68	Heat_shock_protein_68	0.134512	0.276842	0.36467
O97172	U729_DROME	CG18508	UPF0729_protein_CG18508	0.543175	5.49509e-05	0.000276904
O97182	O97182_DROME	Arpc1	Actin_related_complex_p41_subunit	0.1354	0.269245	0.356721
O97183	O97183_DROME	RpII33	GH07456p	-0.220847	0.0365812	0.0672708
O97365	O97365_DROME	BM-40-SPARC	BM-40_(Precursor)	0.326502	0.0511	0.089639
O97418	O97418_DROME	CG3621-RA	CG3621	-0.917809	5.62275e-07	7.57337e-06
O97422	B3GI_DROME	GlcAT-I	Galactosylgalactosylxylosylprotein_3-beta-glucuronosyltransferase_I	-0.337313	0.00864558	0.0193755
O97428	O97428_DROME	cib	Ciboulot,_isoform_A	0.0573641	0.893276	0.92266
O97454	O97454_DROME	l(1)10Bb	L(1)10Bb	-0.0487708	0.729985	0.794163
O97477	INO1_DROME	Inos	Inositol-3-phosphate_synthase	1.70653	0.000405779	0.00146664
O97479	O97479_DROME	Sodh-1	FI05212p	1.74176	1.46452e-05	9.53077e-05
P00334	ADH_DROME	Adh	Alcohol_dehydrogenase	0.349432	0.222435	0.305749
P00399	COX1_DROME	mt:CoI	Cytochrome_c_oxidase_subunit_1	-0.382041	0.012313	0.0262121
P00408	COX2_DROME	mt:CoII	Cytochrome_c_oxidase_subunit_2	-0.571453	0.00120597	0.00363238
P00417	COX3_DROME	mt:CoIII	Cytochrome_c_oxidase_subunit_3	-0.672047	0.00960989	0.0211755
P00967	PUR2_DROME	ade3	Trifunctional_purine_biosynthetic_protein_adenosine-3	1.03751	0.000281315	0.00107888
P02255	H1_DROME	His1	Histone_H1	-0.726347	0.00271635	0.00730955
P02283	H2B_DROME	His2B	Histone_H2B	-0.436576	0.003017	0.00799021
P02515	HSP22_DROME	Hsp22	Heat_shock_protein_22	-0.109298	0.520688	0.61063
P02517	HSP26_DROME	Hsp26	Heat_shock_protein_26	-0.37444	0.024459	0.0478139
P02518	HSP27_DROME	Hsp27	Heat_shock_protein_27	0.265223	0.0541918	0.0944362
P02572	ACT2_DROME	Act42A	Actin-42A	0.0842759	0.483133	0.57518
P02825	HSP71_DROME	Hsp70Ab	Major_heat_shock_70_kDa_protein_Ab	0.549697	0.000772587	0.00252037
P02840	SGS3_DROME	Sgs3	Salivary_glue_protein_Sgs-3	-0.222826	0.612632	0.69572
P02842	SGS8_DROME	Sgs8	Salivary_glue_protein_Sgs-8	-0.410075	0.283313	0.371539
P02843	VIT1_DROME	Yp1	Vitellogenin-1	4.01123	2.98097e-07	4.76956e-06
P02844	VIT2_DROME	Yp2	Vitellogenin-2	3.50056	0.000426407	0.00153019
P04052	RPB1_DROME	RpII215	DNA-directed_RNA_polymerase_II_subunit_RPB1	-0.101201	0.212227	0.294213
P04197	MYB_DROME	Myb	Myb_protein	0.320652	0.0707448	0.118002
P04359	RL32_DROME	RpL32	60S_ribosomal_protein_L32	-0.875604	2.14858e-06	2.17026e-05
P04388	RAS2_DROME	Ras64B	Ras-like_protein_2	0.162692	0.121799	0.184814
P05205	HP1_DROME	Su(var)205	Heterochromatin_protein_1	0.174399	0.189641	0.267103
P05389	RLA2_DROME	RpLP2	60S_acidic_ribosomal_protein_P2	-0.903809	0.00101097	0.00314302
P05552	ADF1_DROME	Adf1	Transcription_factor_Adf-1	-0.0686818	0.68806	0.759405
P05661-10	MYSA_DROME	Mhc	Isoform_11b_of_Myosin_heavy_chain,_muscle	-1.31579	0.000527511	0.001829
P05661-18	MYSA_DROME	Mhc	Isoform_E_of_Myosin_heavy_chain,_muscle	0.259262	0.47639	0.568635
P05812	HSP6A_DROME	Hsp67Ba	Heat_shock_protein_67B1	0.647607	0.0521928	0.0912376
P05990	PYR1_DROME	r	CAD_protein	0.639021	0.000301443	0.00114298
P06604	TBA2_DROME	alphaTub85E	Tubulin_alpha-2_chain	0.227585	0.561799	0.648846
P06607	VIT3_DROME	Yp3	Vitellogenin-3	1.26103	0.0154711	0.0321483
P06742	MLC1_DROME	Mlc1	Myosin_light_chain_alkali	-0.76534	0.0318226	0.0596421
P06742-2	MLC1_DROME	Mlc1	Isoform_Indirect_flight_muscle_of_Myosin_light_chain_alkali	-0.905599	0.293482	0.382379
P06754-2	TPM1_DROME	Tm1	Isoform_A_of_Tropomyosin-1,_isoforms_9A/A/B	-0.656169	7.8501e-05	0.000371015
P07190	MAL1_DROME	Mal-A1	Maltase_A1	0.50688	0.367934	0.460398
P07192	MAL3_DROME	Mal-A3	Maltase_A3	0.101959	0.814943	0.862315
P07486	G3P1_DROME	Gapdh1	Glyceraldehyde-3-phosphate_dehydrogenase_1	-1.70268	9.51614e-09	3.36684e-07
P07664	SRYD_DROME	Sry-delta	Serendipity_locus_protein_delta	-0.142614	0.163269	0.236455
P07665	SRYB_DROME	Sry-beta	Serendipity_locus_protein_beta	-0.428251	0.0127837	0.0270713
P07701	SGS5_DROME	Sgs5	Salivary_glue_protein_Sgs-5	-0.304376	0.573834	0.659109
P07764	ALF_DROME	Ald	Fructose-bisphosphate_aldolase	-1.5489	8.36041e-09	3.08843e-07
P08120	CO4A1_DROME	Cg25C	Collagen_alpha-1(IV)_chain	0.467752	0.00699387	0.0161328
P08144	AMYA_DROME	Amy-p	Alpha-amylase_A	1.3266	0.000372017	0.00136724
P08266	RPB2_DROME	RpII140	DNA-directed_RNA_polymerase_II_subunit_RPB2	0.130597	0.106052	0.1647
P08630	BTKL_DROME	Btk29A	Tyrosine-protein_kinase_Btk29A	0.548116	0.000424448	0.00152425
P08646	RAS1_DROME	Ras85D	Ras-like_protein_1	-0.315754	0.00349589	0.00908605
P08736	EF1A1_DROME	Ef1alpha48D	Elongation_factor_1-alpha_1	0.79124	0.054898	0.0954022
P08841	TBB3_DROME	betaTub60D	Tubulin_beta-3_chain	0.428566	9.86616e-05	0.00045224
P08879	NDKA_DROME	awd	Nucleoside_diphosphate_kinase	0.0899381	0.479836	0.571933
P08953	TOLL_DROME	Tl	Protein_toll	-0.185597	0.289173	0.378138
P08970	SUHW_DROME	su(Hw)	Protein_suppressor_of_hairy_wing	-0.162614	0.166935	0.240655
P09180	RL4_DROME	RpL4	60S_ribosomal_protein_L4	-0.785842	1.81486e-07	3.19344e-06
P09208	INSR_DROME	InR	Insulin-like_receptor	0.218881	0.111003	0.171015
P09491	TPM2_DROME	Tm2	Tropomyosin-2	-0.826702	0.00530169	0.0127872
P0DKM0	COA3_DROME	Ccdc56	Cytochrome_c_oxidase_assembly_factor_3,_mitochondrial	-0.739215	4.30085e-05	0.000226472
P10040	CRB_DROME	crb	Protein_crumbs	-0.144575	0.317928	0.407051
P10090	WHITE_DROME	w	Protein_white	-0.749652	2.95774e-06	2.77752e-05
P10351	XDH_DROME	ry	Xanthine_dehydrogenase	0.857544	0.000930262	0.00293755
P10379	UZIP_DROME	uzip	Protein_unzipped	0.198003	0.306556	0.395922
P10987	ACT1_DROME	Act5C	Actin-5C	0.063681	0.655112	0.733352
P11046	LAMB1_DROME	LanB1	Laminin_subunit_beta-1	0.00162893	0.983864	0.988982
P11147	HSP7D_DROME	Hsc70-4	Heat_shock_70_kDa_protein_cognate_4	-0.283937	0.00214985	0.00597391
P11346	KRAF1_DROME	phl	Raf_homolog_serine/threonine-protein_kinase_phl	-0.380648	0.00813482	0.0184428
P11584	ITBX_DROME	mys	Integrin_beta-PS	-0.137124	0.197222	0.276078
P11995	LSP1A_DROME	Lsp1alpha	Larval_serum_protein_1_alpha_chain	2.56161	2.09764e-06	2.13167e-05
P11996	LSP1B_DROME	Lsp1beta	Larval_serum_protein_1_beta_chain	2.1356	3.78416e-06	3.32371e-05
P11997	LSP1G_DROME	Lsp1gamma	Larval_serum_protein_1_gamma_chain	1.95208	4.13561e-06	3.57048e-05
P12080	ITA2_DROME	if	Integrin_alpha-PS2	-0.324374	0.00584575	0.0138933
P12370	KAPC_DROME	Pka-C1	cAMP-dependent_protein_kinase_catalytic_subunit	-0.386088	0.00330314	0.00864323
P12426	APT_DROME	Aprt	Adenine_phosphoribosyltransferase	0.0339227	0.802625	0.85157
P12646	G6PD_DROME	Zw	Glucose-6-phosphate_1-dehydrogenase	0.973451	0.000369372	0.00135951
P12881	PSA1_DROME	Prosalpha6	Proteasome_subunit_alpha_type-1	-0.182805	0.0306217	0.0577056
P12982	PP12_DROME	Pp1-87B	Serine/threonine-protein_phosphatase_alpha-2_isoform	-0.412238	0.00138652	0.00408796
P13002-1	ELF1_DROME	grh	Isoform_N_of_Protein_grainyhead	-0.13429	0.387484	0.480435
P13060	EF2_DROME	EF2	Elongation_factor_2	0.237537	0.061442	0.104426
P13469	MODU_DROME	mod	DNA-binding_protein_modulo	1.06916	6.42918e-08	1.46819e-06
P13496	DCTN1_DROME	Gl	Dynactin_subunit_1	-0.531304	7.43484e-07	9.33815e-06
P13607	ATNA_DROME	Atpalpha	Sodium/potassium-transporting_ATPase_subunit_alpha	0.483314	0.00248445	0.00678732
P14130	RS14_DROME	RpS14a	40S_ribosomal_protein_S14	-0.6689	1.65152e-05	0.000106786
P14199	REF2P_DROME	ref(2)P	Protein_ref(2)P	1.38652	6.84297e-07	8.7926e-06
P14318	MP20_DROME	Mp20	Muscle-specific_protein_20	0.13723	0.703946	0.773033
P15007	ENO_DROME	Eno	Enolase	-1.56502	5.29737e-09	2.16788e-07
P15215	LAMC1_DROME	LanB2	Laminin_subunit_gamma-1	-0.222912	0.0120389	0.025694
P15330	DORS_DROME	dl	Embryonic_polarity_protein_dorsal	-0.503992	0.000496228	0.0017349
P15357	RS27A_DROME	RpS27A	Ubiquitin-40S_ribosomal_protein_S27a	-0.655706	4.4908e-07	6.33759e-06
P16163	URIC_DROME	Uro	Uricase	2.69454	0.00657351	0.0153179
P16371	GROU_DROME	gro	Protein_groucho	-0.262125	0.0613153	0.104317
P16378	GNAO_DROME	Galphao	G_protein_alpha_o_subunit	0.336503	0.0206002	0.0411023
P16620	PTP69_DROME	Ptp69D	Tyrosine-protein_phosphatase_69D	-0.439519	0.000212683	0.0008555
P17210	KINH_DROME	Khc	Kinesin_heavy_chain	-0.255238	0.0164197	0.0338778
P17336	CATA_DROME	Cat	Catalase	0.641156	0.0270227	0.0521359
P17704	RS17_DROME	RpS17	40S_ribosomal_protein_S17	-0.827169	6.10858e-06	4.77286e-05
P17719	DYR_DROME	Dhfr	Dihydrofolate_reductase	0.625145	1.81132e-06	1.91178e-05
P17789	TTKB_DROME	ttk	Protein_tramtrack,_beta_isoform	-0.0441183	0.62706	0.708804
P17886	CRN_DROME	crn	Protein_crooked_neck	-0.03792	0.582781	0.667402
P17917	PCNA_DROME	PCNA	Proliferating_cell_nuclear_antigen	-0.0395399	0.749826	0.809438
P18053	PSA4_DROME	Prosalpha3	Proteasome_subunit_alpha_type-4	0.0369629	0.628192	0.709381
P18106	FPS_DROME	Fps85D	Tyrosine-protein_kinase_Fps85D	-0.458756	1.364e-05	8.9931e-05
P18173	DHGL_DROME	Gld	Glucose_dehydrogenase_[FAD,_quinone]	-0.607467	0.00393066	0.00994341
P18432	MLR_DROME	Mlc2	Myosin_regulatory_light_chain_2	-1.1961	0.00291257	0.0077504
P18489	SYB_DROME	Syb	Synaptobrevin	0.439106	0.00181024	0.00514112
P18929	NU1M_DROME	mt:ND1	NADH-ubiquinone_oxidoreductase_chain_1	-0.890932	6.5514e-07	8.50496e-06
P18930	NU3M_DROME	mt:ND3	NADH-ubiquinone_oxidoreductase_chain_3	-0.923221	0.000352616	0.00130356
P18934	NU4LM_DROME	mt:ND4L	NADH-ubiquinone_oxidoreductase_chain_4L	-1.02314	0.0104557	0.0227696
P18935	CYB_DROME	mt:Cyt-b	Cytochrome_b	-1.08456	3.21952e-06	2.96243e-05
P19109	DDX17_DROME	Rm62	ATP-dependent_RNA_helicase_p62	-0.0278649	0.712698	0.780256
P19339-7	SXL_DROME	Sxl	Isoform_G_of_Protein_sex-lethal	0.314788	0.215345	0.297826
P19538	CI_DROME	ci	Transcriptional_activator_cubitus_interruptus	-0.970407	1.60985e-07	2.91982e-06
P20007	PCKG_DROME	Pepck	Phosphoenolpyruvate_carboxykinase_[GTP]	2.21058	2.34889e-05	0.000139655
P20028	RPA2_DROME	RpI135	DNA-directed_RNA_polymerase_I_subunit_RPA2	1.36816	3.26271e-10	2.68719e-08
P20240	OTE_DROME	Ote	Otefin	0.0840096	0.658764	0.735964
P20348	JANA_DROME	janA	Sex-regulated_protein_janus-A	-0.462191	0.000155151	0.000656678
P20351	T23O_DROME	v	Tryptophan_2,3-dioxygenase	1.23818	2.93023e-06	2.762e-05
P20353	GNAI_DROME	Galphai	G_protein_alpha_i_subunit	0.056435	0.568811	0.654987
P20354	GNAS_DROME	Galphas	G_protein_alpha_s_subunit	0.200749	0.0219838	0.0434146
P20432	GSTT1_DROME	GstD1	Glutathione_S-transferase_1-1	0.498854	0.031465	0.0590071
P20478	GLNA2_DROME	Gs2	Glutamine_synthetase_2_cytoplasmic	0.966526	0.000280439	0.00107798
P20478-3	GLNA2_DROME	Gs2	Isoform_B_of_Glutamine_synthetase_2_cytoplasmic	0.719584	0.132606	0.198632
P21187	PABP_DROME	pAbp	Polyadenylate-binding_protein	-0.320865	0.00375151	0.00958188
P21461	SINA_DROME	sina	E3_ubiquitin-protein_ligase_sina	-0.213817	0.0565703	0.0976329
P21521	SY65_DROME	Syt1	Synaptotagmin_1	1.18903	0.000118018	0.000524712
P21914	SDHB_DROME	SdhB	Succinate_dehydrogenase_[ubiquinone]_iron-sulfur_subunit,_mitochondrial	-0.926924	5.05572e-06	4.16393e-05
P22293	SUS_DROME	su(s)	Protein_suppressor_of_sable	0.0388395	0.71301	0.780428
P22464	ANXB9_DROME	AnxB9	Annexin_B9	-0.0445808	0.631873	0.712897
P22465	ANX10_DROME	AnxB10	Annexin_B10	0.128089	0.29261	0.381639
P22700	ATC1_DROME	Ca-P60A	Calcium-transporting_ATPase_sarcoplasmic/endoplasmic_reticulum_type	-0.849385	1.81773e-05	0.000114057
P22769	PSA71_DROME	Prosalpha4	Proteasome_subunit_alpha_type-7-1	-0.0230921	0.725539	0.791211
P22813	HSF_DROME	Hsf	Heat_shock_factor_protein	-0.0746609	0.658103	0.735389
P22817	IDE_DROME	Ide	Insulin-degrading_enzyme	-0.130399	0.174518	0.250009
P23128	DDX6_DROME	me31B	Putative_ATP-dependent_RNA_helicase_me31b	-0.305172	0.00218817	0.00606028
P23226	MA205_DROME	Map205	205_kDa_microtubule-associated_protein	-0.109094	0.588113	0.672282
P23380	VATL_DROME	Vha16-1	V-type_proton_ATPase_16_kDa_proteolipid_subunit	0.293018	0.0318936	0.0597218
P23625-2	GNAQ_DROME	Galphaq	Isoform_A_of_G_protein_alpha_q_subunit	-0.420214	0.000399299	0.00145158
P23696	PP2A_DROME	mts	Serine/threonine-protein_phosphatase_PP2A	-0.54122	7.04758e-05	0.000341767
P23779	CYTL_DROME	Cys	Cystatin-like_protein	0.0070893	0.958577	0.97102
P24156	L2CC_DROME	l(2)37Cc	Protein_l(2)37Cc	-0.365477	0.00470836	0.0116012
P24785	MLE_DROME	mle	Dosage_compensation_regulator	0.632261	2.90837e-06	2.76052e-05
P25007	PPIA_DROME	Cyp1	Peptidyl-prolyl_cis-trans_isomerase	-0.337052	0.000981273	0.00306969
P25160	ARL1_DROME	Arl1	ADP-ribosylation_factor-like_protein_1	0.144093	0.145027	0.213985
P25167	RPC2_DROME	RpIII128	DNA-directed_RNA_polymerase_III_subunit_RPC2	0.0697897	0.615039	0.697822
P25171	RCC1_DROME	Rcc1	Regulator_of_chromosome_condensation	0.15933	0.403878	0.496837
P25228	RAB3_DROME	Rab3	Ras-related_protein_Rab-3	0.853762	0.0179203	0.0365834
P25822	PUM_DROME	pum	Maternal_protein_pumilio	-0.52284	0.00380992	0.00971133
P25823	TUD_DROME	tud	Maternal_protein_tudor	-0.33088	0.0118448	0.0253335
P25867	UBCD1_DROME	eff	Ubiquitin-conjugating_enzyme_E2-17_kDa	0.0441967	0.676782	0.749758
P25991	SUF_DROME	su(f)	Protein_suppressor_of_forked	0.158632	0.0359158	0.0662656
P26019	DPOLA_DROME	DNApol-alpha180	DNA_polymerase_alpha_catalytic_subunit	2.01807	1.04383e-08	3.6309e-07
P26270	PSMD7_DROME	Rpn8	26S_proteasome_non-ATPase_regulatory_subunit_7	-0.0690352	0.411546	0.504417
P26675	SOS_DROME	Sos	Protein_son_of_sevenless	-0.377996	0.000957804	0.00300939
P26686	SRR55_DROME	B52	Serine-arginine_protein_55	0.0378902	0.671375	0.745225
P26802	DDX51_DROME	Dbp73D	Probable_ATP-dependent_RNA_helicase_Dbp73D	0.882284	6.62818e-08	1.50679e-06
P28668	SYEP_DROME	Aats-glupro	Bifunctional_glutamate/proline--tRNA_ligase	-0.484164	0.000236571	0.000935852
P29310-2	1433Z_DROME	14-3-3zeta	Isoform_VI'_of_14-3-3_protein_zeta	-0.169501	0.0193129	0.0389201
P29327	RS6_DROME	RpS6	40S_ribosomal_protein_S6	-0.732705	1.077e-05	7.50461e-05
P29349	CSW_DROME	csw	Tyrosine-protein_phosphatase_corkscrew	-0.373469	0.00370429	0.00949025
P29413	CALR_DROME	Crc	Calreticulin	0.25677	0.0611061	0.104102
P29613	TPIS_DROME	Tpi	Triosephosphate_isomerase	-1.38304	7.17021e-07	9.09675e-06
P29742	CLH_DROME	Chc	Clathrin_heavy_chain	0.0158227	0.805498	0.85376
P29843	HSP7A_DROME	Hsc70-1	Heat_shock_70_kDa_protein_cognate_1	-0.287045	0.50001	0.591489
P29844	HSP7C_DROME	Hsc70-3	Heat_shock_70_kDa_protein_cognate_3	-0.120854	0.223745	0.307129
P29845	HSP7E_DROME	Hsc70-5	Heat_shock_70_kDa_protein_cognate_5	-0.377736	0.0338269	0.0628733
P29993	ITPR_DROME	Itp-r83A	Inositol_1,4,5-trisphosphate_receptor	0.514069	0.000164964	0.000690648
P30430	FUR1C_DROME	Fur1	Furin-like_protease_1,_isoform_1-CRR	0.143944	0.299532	0.389051
P32100	RL7_DROME	RpL7	60S_ribosomal_protein_L7	-0.885158	8.18878e-07	1.00588e-05
P32234	128UP_DROME	128up	GTP-binding_protein_128up	-0.0660408	0.460946	0.553223
P32392	ARP3_DROME	Arp3	Actin-related_protein_3	0.148373	0.0856207	0.137124
P32748	PYRD_DROME	Dhod	Dihydroorotate_dehydrogenase_(quinone),_mitochondrial	0.0569786	0.432414	0.525889
P32866	GPRK2_DROME	Gprk2	G_protein-coupled_receptor_kinase_2	0.00820804	0.902087	0.928698
P33269	CP4D1_DROME	Cyp4d1	Cytochrome_P450_4d1	2.32544	1.32581e-06	1.48349e-05
P33269-2	CP4D1_DROME	Cyp4d1	Isoform_Short_of_Cytochrome_P450_4d1	1.69191	6.77589e-05	0.000329865
P33270	CP6A2_DROME	Cyp6a2	Cytochrome_P450_6a2	2.13355	5.99918e-07	7.99467e-06
P35220	CTNA_DROME	alpha-Cat	Catenin_alpha	-0.212595	0.229344	0.313274
P35381	ATPA_DROME	blw	ATP_synthase_subunit_alpha,_mitochondrial	-0.454598	0.00426449	0.0106379
P35421	PUR4_DROME	ade2	Phosphoribosylformylglycinamidine_synthase	1.10112	5.27196e-06	4.28581e-05
P35600	RFC1_DROME	Gnf1	Replication_factor_C_subunit_1	-0.252029	0.0241534	0.0472717
P35832	PTP99_DROME	Ptp99A	Tyrosine-protein_phosphatase_99A	-0.392948	0.0015417	0.00449015
P35875	PARP_DROME	Parp	Poly_[ADP-ribose]_polymerase	1.29631	2.03263e-08	5.83539e-07
P36241	RL19_DROME	RpL19	60S_ribosomal_protein_L19	-0.707655	0.00147057	0.00430044
P36872	2ABA_DROME	tws	Protein_phosphatase_PP2A_55_kDa_regulatory_subunit	-0.114464	0.189076	0.266531
P36951	HYI_DROME	Gip	Putative_hydroxypyruvate_isomerase	0.0699084	0.592315	0.676469
P36958	RPB9_DROME	RpII15	DNA-directed_RNA_polymerase_II_subunit_RPB9	-0.0264611	0.749104	0.808973
P37161	LYSX_DROME	LysX	Lysozyme_X	-1.38856	9.77517e-08	1.97231e-06
P38040	GBG1_DROME	Ggamma1	Guanine_nucleotide-binding_protein_subunit_gamma-1	-0.244443	0.174956	0.250493
P38979	RSSA_DROME	sta	40S_ribosomal_protein_SA	-0.490817	3.3402e-05	0.000183527
P39205	CIN_DROME	cin	Molybdenum_cofactor_synthesis_protein_cinnamon	0.226951	0.027713	0.0532428
P39769	PHP_DROME	ph-p	Polyhomeotic-proximal_chromatin_protein	0.0193191	0.942331	0.958743
P40301	PSA2_DROME	Prosalpha2	Proteasome_subunit_alpha_type-2	-0.18803	0.0979354	0.153759
P40304	PSB1_DROME	Prosbeta6	Proteasome_subunit_beta_type-1	0.0613802	0.365366	0.457755
P40320	METK_DROME	Sam-S	S-adenosylmethionine_synthase	-1.55095	4.14817e-07	5.97146e-06
P40417	ERKA_DROME	rl	Mitogen-activated_protein_kinase_ERK-A	0.0156071	0.81991	0.866112
P40423	SQH_DROME	sqh	Myosin_regulatory_light_chain_sqh	0.363741	0.0198802	0.0399034
P40796	LA_DROME	La	La_protein_homolog	0.777179	1.16836e-05	8.008e-05
P40797	PNUT_DROME	pnut	Protein_peanut	-0.355284	0.00896725	0.020014
P40946	ARF3_DROME	Arf51F	ADP-ribosylation_factor_3	-0.0527817	0.568155	0.654531
P41042	RS4_DROME	RpS4	40S_ribosomal_protein_S4	-0.759039	2.16535e-06	2.17314e-05
P41044	CAB32_DROME	Cbp53E	Calbindin-32	0.270061	0.36566	0.458009
P41093	RL18A_DROME	RpL18A	60S_ribosomal_protein_L18a	-0.85994	4.61898e-07	6.464e-06
P41094	RS18_DROME	RpS18	40S_ribosomal_protein_S18	-0.882951	5.66083e-06	4.51429e-05
P41374	IF2A_DROME	eIF-2alpha	Eukaryotic_translation_initiation_factor_2_subunit_1	0.0816443	0.380263	0.472999
P41375	IF2B_DROME	eIF-2beta	Eukaryotic_translation_initiation_factor_2_subunit_2	0.316626	0.00510482	0.0123957
P41572	6PGD_DROME	Pgd	6-phosphogluconate_dehydrogenase,_decarboxylating	1.01887	3.84979e-05	0.000206197
P41900	T2FB_DROME	TfIIFbeta	General_transcription_factor_IIF_subunit_2	0.540659	1.32117e-05	8.77693e-05
P42207	SEPT1_DROME	42614	Septin-1	-0.1936	0.177272	0.253159
P42787-3	CBPD_DROME	svr	Isoform_3_of_Carboxypeptidase_D	0.597667	0.00087303	0.00279111
P42787-5	CBPD_DROME	svr	Isoform_5_of_Carboxypeptidase_D	0.671332	0.000701743	0.0023164
P43332	SNRPA_DROME	snf	U1_small_nuclear_ribonucleoprotein_A	0.0746443	0.48936	0.580947
P45437	COPB_DROME	betaCop	Coatomer_subunit_beta	0.0883765	0.345767	0.43745
P45594	CADF_DROME	tsr	Cofilin/actin-depolymerizing_factor_homolog	0.0418974	0.689173	0.760467
P45888	ARP2_DROME	Arp2	Actin-related_protein_2	0.277877	0.00110877	0.00338425
P45889	ACTZ_DROME	Arp1	Actin-related_protein_1	-0.383969	1.20359e-05	8.16035e-05
P45891	ACTY_DROME	Arp53D	Actin-like_protein_53D	1.35214	7.8216e-07	9.72666e-06
P45975	SUV39_DROME	Su(var)3-9	Histone-lysine_N-methyltransferase_Su(var)3-9	0.16089	0.0608066	0.103697
P46222	RL11_DROME	RpL11	60S_ribosomal_protein_L11	-0.799515	2.73201e-06	2.6244e-05
P46223	RL7A_DROME	RpL7A	60S_ribosomal_protein_L7a	-0.818747	1.13304e-06	1.29373e-05
P46415	ADHX_DROME	Fdh	Alcohol_dehydrogenase_class-3	0.409512	0.00696262	0.0160902
P47948	TNNC2_DROME	TpnC47D	Troponin_C,_isoform_2	-0.0170954	0.96746	0.97876
P47949	TNNC3_DROME	TpnC73F	Troponin_C,_isoform_3	0.266347	0.433673	0.527037
P48159	RL23_DROME	RpL23	60S_ribosomal_protein_L23	-0.772592	1.32567e-06	1.48349e-05
P48375	FKB12_DROME	FK506-bp2	12_kDa_FK506-binding_protein	-0.339019	0.00792268	0.0180515
P48461	PP11_DROME	Pp1alpha-96A	Serine/threonine-protein_phosphatase_alpha-1_isoform	0.35258	0.0136699	0.0287595
P48555	RALA_DROME	Rala	Ras-related_protein_Ral-a	-0.0906931	0.41837	0.511658
P48588	RS25_DROME	RpS25	40S_ribosomal_protein_S25	-0.741484	1.67928e-05	0.000108025
P48591	RIR1_DROME	RnrL	Ribonucleoside-diphosphate_reductase_large_subunit	1.51623	3.3207e-09	1.54474e-07
P48596	GCH1_DROME	Pu	GTP_cyclohydrolase_1	0.626638	0.0129512	0.027385
P48601	PRS4_DROME	Rpt2	26S_protease_regulatory_subunit_4	-0.00325584	0.964915	0.976775
P48604	GRPE_DROME	Roe1	GrpE_protein_homolog,_mitochondrial	-0.399652	0.00421942	0.010536
P48607-5	SPZ_DROME	spz	Isoform_8.29_of_Protein_spaetzle	-0.300209	0.0473615	0.0839903
P48609	CDK5_DROME	Cdk5	Cyclin-dependent_kinase_5_homolog	-0.285906	0.000888856	0.00282464
P48610-2	KARG_DROME	Argk	Isoform_A_of_Arginine_kinase	-0.830596	2.01468e-06	2.06908e-05
P48611	PTPS_DROME	pr	6-pyruvoyl_tetrahydrobiopterin_synthase	0.56867	0.000368693	0.001358
P48612	PELO_DROME	pelo	Protein_pelota	-0.116074	0.14129	0.209145
P49028	MGN_DROME	mago	Protein_mago_nashi	-0.0898748	0.856841	0.895148
P49455	TPM4_DROME	Tm1	Tropomyosin-1,_isoforms_33/34	-1.03311	0.00224485	0.00619337
P49455-2	TPM4_DROME	Tm1	Isoform_34_of_Tropomyosin-1,_isoforms_33/34	-0.381641	0.663923	0.740411
P49630	RL36_DROME	RpL36	60S_ribosomal_protein_L36	-0.678077	3.56345e-05	0.000194204
P49657	MNB_DROME	mnb	Serine/threonine-protein_kinase_minibrain	0.215995	0.142439	0.210474
P49735	MCM2_DROME	Mcm2	DNA_replication_licensing_factor_Mcm2	0.489162	0.0102291	0.0223535
P49846	TAF5_DROME	Taf5	Transcription_initiation_factor_TFIID_subunit_5	-0.0820248	0.355815	0.447687
P49847	TAF6_DROME	Taf6	Transcription_initiation_factor_TFIID_subunit_6	-0.362566	0.083026	0.133613
P49906	TAF11_DROME	Taf11	Transcription_initiation_factor_TFIID_subunit_11	-0.294866	0.0727832	0.120681
P49963	SRP19_DROME	Srp19	Signal_recognition_particle_19_kDa_protein	-0.0444387	0.724771	0.790557
P50245	SAHH2_DROME	Ahcy89E	Putative_adenosylhomocysteinase_2	0.154964	0.231948	0.315801
P50882	RL9_DROME	RpL9	60S_ribosomal_protein_L9	-0.870948	1.28923e-07	2.41683e-06
P50887	RL22_DROME	RpL22	60S_ribosomal_protein_L22	-0.805206	1.82073e-05	0.000114057
P51406	BYS_DROME	bys	Bystin	1.04824	6.25054e-07	8.18126e-06
P51592	HYD_DROME	hyd	E3_ubiquitin-protein_ligase_hyd	0.171669	0.0667265	0.112118
P52029	G6PI_DROME	Pgi	Glucose-6-phosphate_isomerase	-1.33097	4.83586e-07	6.69294e-06
P52034	K6PF_DROME	Pfk	6-phosphofructokinase	-1.5224	3.86224e-09	1.73249e-07
P52304	POLO_DROME	polo	Serine/threonine-protein_kinase_polo	0.875325	0.00156836	0.00455985
P52485	UBCD2_DROME	UbcD2	Ubiquitin-conjugating_enzyme_E2-24_kDa	0.388026	0.00160549	0.00464362
P52486	UBCD4_DROME	UbcD4	Ubiquitin-conjugating_enzyme_E2-22_kDa	-0.565649	1.52595e-05	9.90487e-05
P52656	T2AG_DROME	TfIIA-S	Transcription_initiation_factor_IIA_subunit_2	-0.0671137	0.553029	0.64078
P53034	RFC2_DROME	RfC4	Replication_factor_C_subunit_2	0.0394423	0.753395	0.812767
P53624	MA121_DROME	alpha-Man-I	Mannosyl-oligosaccharide_alpha-1,2-mannosidase_isoform_A	0.125391	0.172674	0.247818
P53777	MLP1_DROME	Mlp60A	Muscle_LIM_protein_1	-0.318968	0.434509	0.52767
P53997	SET_DROME	Set	Protein_SET	-0.636787	9.87475e-05	0.00045224
P54351	NSF2_DROME	Nsf2	Vesicle-fusing_ATPase_2	0.0474226	0.611611	0.694717
P54352-2	EAS_DROME	eas	Isoform_A_of_Ethanolamine_kinase	1.0078	9.11763e-06	6.5626e-05
P54353	DOD_DROME	dod	Putative_peptidyl-prolyl_cis-trans_isomerase_dodo	-0.15278	0.0288198	0.0549698
P54358	DPOD1_DROME	DNApol-delta	DNA_polymerase_delta_catalytic_subunit	1.36087	2.05121e-08	5.85528e-07
P54359	SEPT2_DROME	42615	Septin-2	-0.370552	0.00563229	0.0135003
P54361	OAZ_DROME	Oda	Ornithine_decarboxylase_antizyme	-0.0809205	0.593391	0.677545
P54362	AP3D_DROME	g	AP-3_complex_subunit_delta	0.105754	0.171937	0.247086
P54385	DHE3_DROME	Gdh	Glutamate_dehydrogenase,_mitochondrial	-0.453884	0.0547415	0.095229
P54397	FKB39_DROME	FK506-bp1	39_kDa_FK506-binding_nuclear_protein	1.05497	3.00336e-09	1.43704e-07
P54398	FBP2_DROME	Fbp2	Fat_body_protein_2	1.54573	4.04757e-06	3.51209e-05
P54399	PDI_DROME	Pdi	Protein_disulfide-isomerase	0.525235	0.00320958	0.00844238
P54611	VATE_DROME	Vha26	V-type_proton_ATPase_subunit_E	0.180002	0.145929	0.214833
P54622	SSBP_DROME	mtSSB	Single-stranded_DNA-binding_protein,_mitochondrial	-0.191959	0.0303846	0.0573442
P55162	HEM_DROME	Hem	Membrane-associated_protein_Hem	0.0355887	0.668852	0.743822
P55824	FAF_DROME	faf	Probable_ubiquitin_carboxyl-terminal_hydrolase_FAF	-0.268139	0.00128623	0.0038373
P55828	RS20_DROME	RpS20	40S_ribosomal_protein_S20	-0.722482	3.19515e-05	0.000178162
P55830	RS3A_DROME	RpS3A	40S_ribosomal_protein_S3a	-0.919599	4.40596e-08	1.08508e-06
P55841	RL14_DROME	RpL14	60S_ribosomal_protein_L14	-0.811607	1.05149e-06	1.22568e-05
P55935	RS9_DROME	RpS9	40S_ribosomal_protein_S9	-0.874835	5.54675e-06	4.44448e-05
P56079	CDSA_DROME	CdsA	Phosphatidate_cytidylyltransferase,_photoreceptor-specific	0.157576	0.126135	0.190186
P56175	RCL1_DROME	Rtc1	Probable_RNA_3'-terminal_phosphate_cyclase-like_protein	1.36027	8.6497e-10	5.79414e-08
P56538	IF6_DROME	eIF6	Eukaryotic_translation_initiation_factor_6	0.876823	8.92858e-07	1.07766e-05
P61851	SODC_DROME	Sod	Superoxide_dismutase_[Cu-Zn]	-0.202874	0.0300328	0.056745
P61855	AKH_DROME	Akh	Adipokinetic_hormone	-0.245884	0.567541	0.654124
P61857	TBB2_DROME	betaTub85D	Tubulin_beta-2_chain	-0.200395	0.240034	0.324961
P62152	CALM_DROME	Cam	Calmodulin	-0.406432	0.0468708	0.083267
P80455	RS12_DROME	RpS12	40S_ribosomal_protein_S12	-0.761967	6.22908e-07	8.18126e-06
P81900	KAPR2_DROME	Pka-R2	cAMP-dependent_protein_kinase_type_II_regulatory_subunit	-0.673484	7.5849e-07	9.45572e-06
P81928	140U_DROME	140up	RPII140-upstream_gene_protein	0.0759805	0.468183	0.560303
P82147	L2EFL_DROME	l(2)efl	Protein_lethal(2)essential_for_life	1.59295	0.00168714	0.0048463
P82712	CCD1P_DROME	Cyp12d1-p	Probable_cytochrome_P450_12d1_proximal,_mitochondrial	0.280482	0.273623	0.361283
P82713	CP392_DROME	Cyp309a2	Probable_cytochrome_P450_309a2	0.433818	0.019732	0.0396218
P82804	WIBG_DROME	wibg	Partner_of_Y14_and_mago	-0.363416	0.11449	0.175098
P82890	PPAC1_DROME	primo-1	Low_molecular_weight_phosphotyrosine_protein_phosphatase_1	-0.237749	0.0401948	0.0729812
P83094	STIM_DROME	Stim	Stromal_interaction_molecule_homolog	0.209889	0.0429802	0.0774229
P83098	STLK_DROME	Stlk	Putative_serine/threonine-protein_kinase_STE20-like	0.197238	0.241589	0.326714
P83100	MK14C_DROME	p38c	Putative_mitogen-activated_protein_kinase_14C	0.385784	0.0808532	0.130697
P83102	DYRK3_DROME	Dyrk3	Putative_dual_specificity_tyrosine-phosphorylation-regulated_kinase_3_homolog	-0.371541	0.00338285	0.00882881
P83967	ACT6_DROME	Act88F	Actin,_indirect_flight_muscle	-0.647562	0.290916	0.38024
P84029	CYC2_DROME	Cyt-c-p	Cytochrome_c-2	-1.03698	4.21435e-06	3.60697e-05
P84040	H4_DROME	His4	Histone_H4	-0.441095	0.0274595	0.0528548
P84051	H2A_DROME	His2A	Histone_H2A	-0.202731	0.622884	0.705131
P84345	ATP8_DROME	mt:ATPase8	ATP_synthase_protein_8	-0.931582	6.64284e-06	5.09521e-05
P91634	P91634_DROME	Pi3K92E	PI-3_kinase	-0.659881	4.1562e-06	3.57547e-05
P91660	L259_DROME	l(2)03659	Probable_multidrug_resistance-associated_protein_lethal(2)03659	0.016708	0.894092	0.923123
P91875	RPA1_DROME	RpI1	DNA-directed_RNA_polymerase_I_subunit_RPA1	1.3596	7.37337e-10	5.29198e-08
P91926	AP2A_DROME	AP-2alpha	AP-2_complex_subunit_alpha	-0.0880267	0.292169	0.381385
P91927	A60DA_DROME	Letm1	LETM1_and_EF-hand_domain-containing_protein_anon-60Da,_mitochondrial	-0.458282	0.00388355	0.00984903
P91928	IMMT_DROME	CG6455	Putative_mitochondrial_inner_membrane_protein	-0.529904	0.000240805	0.000947774
P91931	DCAM_DROME	SamDC	S-adenosylmethionine_decarboxylase_proenzyme	0.381886	0.0115375	0.0248018
P91938	TRXR1_DROME	Trxr-1	Thioredoxin_reductase_1,_mitochondrial	-0.385145	0.000302354	0.00114471
P92177	1433E_DROME	14-3-3epsilon	14-3-3_protein_epsilon	0.354697	0.00175639	0.00502706
P92201	LCP8_DROME	Lcp65Ag1	Larval_cuticle_protein_8	0.782899	0.315028	0.404472
P92204	NELFE_DROME	Nelf-E	Negative_elongation_factor_E	-0.124284	0.627862	0.709327
Q00174	LAMA_DROME	LanA	Laminin_subunit_alpha	-0.0184071	0.831484	0.875577
Q00449	MDR49_DROME	Mdr49	Multidrug_resistance_protein_homolog_49	0.968662	1.209e-05	8.18601e-05
Q00637	SODM_DROME	Sod2	Superoxide_dismutase_[Mn],_mitochondrial	-0.821288	2.84316e-07	4.62007e-06
Q00748	MDR65_DROME	Mdr65	Multidrug_resistance_protein_homolog_65	0.267947	0.213996	0.296421
Q01637	UMPS_DROME	r-l	Uridine_5'-monophosphate_synthase	0.122476	0.448568	0.540952
Q01989	MYS9_DROME	jar	Myosin_heavy_chain_95F	0.411309	0.00763971	0.0174701
Q02645-2	HTS_DROME	hts	Isoform_B_of_Protein_hu-li_tai_shao	0.0474357	0.619992	0.702332
Q02645-3	HTS_DROME	hts	Isoform_C_of_Protein_hu-li_tai_shao	-0.382508	0.0180065	0.0367145
Q02910	CPN_DROME	Cpn	Calphotin	2.97306	4.91462e-06	4.06772e-05
Q03042	KGP1_DROME	Pkg21D	cGMP-dependent_protein_kinase,_isozyme_1	0.320165	0.000754081	0.00246647
Q03043	KGP24_DROME	for	cGMP-dependent_protein_kinase,_isozyme_2_forms_cD4/T1/T3A/T3B	0.0450054	0.554144	0.641636
Q03334	RS13_DROME	RpS13	40S_ribosomal_protein_S13	-0.85938	1.24537e-07	2.36104e-06
Q03427	LAMC_DROME	LamC	Lamin-C	0.144655	0.158763	0.23066
Q04047	NONA_DROME	nonA	Protein_no-on-transient_A	-0.143262	0.163801	0.23702
Q04164	SAS_DROME	sas	Putative_epidermal_cell_surface_receptor	-0.276297	0.281975	0.370364
Q04448	MTDC_DROME	Nmdmc	Bifunctional_methylenetetrahydrofolate_dehydrogenase/cyclohydrolase,_mitochondrial	0.112679	0.231238	0.315091
Q04688	ELG_DROME	Ets97D	DNA-binding_protein_Ets97D	0.189703	0.115857	0.176813
Q04691	FBP1_DROME	Fbp1	Fat-body_protein_1	2.3706	6.15181e-06	4.79173e-05
Q05344	SSRP1_DROME	Ssrp	FACT_complex_subunit_Ssrp1	1.01014	9.48786e-07	1.12955e-05
Q05913	T2FA_DROME	TfIIFalpha	General_transcription_factor_IIF_subunit_1	0.497981	3.47291e-05	0.000190479
Q059A4	Q059A4_DROME	CG4627	CG4627	-0.442436	0.00365114	0.00937318
Q06559	RS3_DROME	RpS3	40S_ribosomal_protein_S3	-0.672701	2.25317e-05	0.000134922
Q06943	HMGZ_DROME	HmgZ	High_mobility_group_protein_Z	-0.73346	0.0603482	0.103196
Q07171	GELS_DROME	Gel	Gelsolin	0.707975	3.71514e-05	0.000200482
Q07886	DDX49_DROME	Dbp45A	Probable_ATP-dependent_RNA_helicase_Dbp45A	1.5135	7.8138e-05	0.000369995
Q08012	DRK_DROME	drk	Protein_enhancer_of_sevenless_2B	-0.00559286	0.970255	0.980797
Q08473	SQD_DROME	sqd	RNA-binding_protein_squid	-0.0390549	0.635883	0.716295
Q09332	UGGG_DROME	Ugt	UDP-glucose:glycoprotein_glucosyltransferase	0.105693	0.212517	0.294535
Q0E8C8	Q0E8C8_DROME	Spn77Ba	FI21492p1	0.299315	0.0969271	0.152605
Q0E8E8	Q0E8E8_DROME	Mpcp	MIP08013p1	-0.223446	0.177832	0.2537
Q0E8F0	Q0E8F0_DROME	caps	Capricious,_isoform_D	0.651439	0.0963517	0.151746
Q0E8F2	Q0E8F2_DROME	CG32103-RB	CG32103,_isoform_B	0.0462616	0.533345	0.62338
Q0E8G6	Q0E8G6_DROME	CG3689	CG3689,_isoform_C	-0.0846585	0.368488	0.460863
Q0E8H7	Q0E8H7_DROME	SP1173	FI19426p1	-0.193427	0.0465014	0.082757
Q0E8H9	Q0E8H9_DROME	Hexo1	Beta-hexosaminidase	-0.222233	0.0570663	0.0983538
Q0E8J0	Q0E8J0_DROME	MEP-1	MEP-1,_isoform_A	0.0445281	0.76931	0.824976
Q0E8K5	Q0E8K5_DROME	mri	AT10158p	0.10799	0.205856	0.286806
Q0E8P1	Q0E8P1_DROME	CG17549	CG17549,_isoform_B	0.855499	2.66457e-05	0.000153871
Q0E8Q7	Q0E8Q7_DROME	CG31731	CG31731,_isoform_B	0.041244	0.649066	0.728538
Q0E8R3	Q0E8R3_DROME	bru-2	Bruno-2,_isoform_E	-0.761853	5.16638e-05	0.000263552
Q0E8R4	Q0E8R4_DROME	Mt2	Methyltransferase_2,_isoform_C	0.75461	3.35925e-06	3.03497e-05
Q0E8U4	Q0E8U4_DROME	CG17224-RB	CG17224,_isoform_A	0.712241	1.16458e-05	7.99592e-05
Q0E8V7	Q0E8V7_DROME	Tim13	CG34132	-0.515454	0.014183	0.0297144
Q0E8X6	Q0E8X6_DROME	eIF2B-delta	eIF2B-delta,_isoform_B	0.223976	0.00698617	0.0161252
Q0E8X7	Q0E8X7_DROME	CG30415	CG30415,_isoform_A	-0.658796	2.05136e-05	0.000124922
Q0E8X8	Q0E8X8_DROME	CG13551	CG13551,_isoform_A	-0.134903	0.77922	0.832228
Q0E8X9	Q0E8X9_DROME	yip3	FI08136p	-0.215304	0.166248	0.239942
Q0E908	Q0E908_DROME	Hil	Hillarin,_isoform_A	-0.247078	0.145992	0.21484
Q0E910	Q0E910_DROME	CG8920	CG8920,_isoform_B	-0.0192498	0.846866	0.886941
Q0E931	Q0E931_DROME	Dgp-1	Dgp-1,_isoform_A	0.072163	0.651196	0.729944
Q0E965	Q0E965_DROME	SRPK	SRPK,_isoform_A	-0.0822819	0.292257	0.381385
Q0E980	Q0E980_DROME	CG8547	CG8547,_isoform_C	0.735338	3.48925e-05	0.000191167
Q0E981	Q0E981_DROME	CG8485	CG8485,_isoform_A	-0.367453	0.000902607	0.00286101
Q0E993	Q0E993_DROME	Aats-val	Valyl-tRNA_synthetase,_isoform_A	0.131476	0.289003	0.378014
Q0E9A5	Q0E9A5_DROME	muskelin	FI21269p1	0.186748	0.11167	0.171785
Q0E9B5	Q0E9B5_DROME	CG8841	CG8841,_isoform_A	-0.191126	0.0870507	0.138971
Q0E9B6	RS11_DROME	RpS11	40S_ribosomal_protein_S11	0.487824	0.028692	0.0547676
Q0E9C3	Q0E9C3_DROME	Sod3	Superoxide_dismutase_[Cu-Zn]	0.0996262	0.477848	0.570172
Q0E9E2	Q0E9E2_DROME	CG1516	Pyruvate_carboxylase	-0.617532	0.0007775	0.00253177
Q0E9F9	Q0E9F9_DROME	CG2915-RB	CG2915,_isoform_A	0.595148	0.00066577	0.00222248
Q0E9G3	KTU_DROME	Nop17l	Protein_kintoun	-1.15308	8.88134e-07	1.07518e-05
Q0E9G4	Q0E9G4_DROME	Drat	CG1600,_isoform_A	0.536652	0.00218366	0.00605113
Q0E9Q5	Q0E9Q5_DROME	p120ctn	Adherens_junction_protein_p120,_isoform_B	-0.200358	0.0793295	0.128939
Q0KHQ1	Q0KHQ1_DROME	CG33714	CG33714,_isoform_A	-0.520382	0.0021001	0.00584862
Q0KHR3	Q0KHR3_DROME	baz	Bazooka,_isoform_B	0.284265	0.0971291	0.152731
Q0KHR5	Q0KHR5_DROME	RhoGAP15B	RhoGAP15B,_isoform_B	0.415037	0.00257383	0.00699724
Q0KHR7	Q0KHR7_DROME	42617	Septin_4,_isoform_A	-0.45976	0.00572694	0.0136634
Q0KHS0	Q0KHS0_DROME	kat80	Katanin_p80_WD40_repeat-containing_subunit_B1	0.0114852	0.944851	0.960723
Q0KHS6	Q0KHS6_DROME	Lsd-2	Lipid_storage_droplets_surface-binding_protein	0.672588	0.00123848	0.00371916
Q0KHU2	Q0KHU2_DROME	Imp	IGF-II_mRNA-binding_protein,_isoform_K	-0.117169	0.274271	0.361853
Q0KHU5	PCAT1_DROME	CG32699	1-acylglycerophosphocholine_O-acyltransferase_1	0.372314	0.0420651	0.0759379
Q0KHX7	Q0KHX7_DROME	CG13366-RB	CG13366,_isoform_B	-0.263444	0.0551595	0.0957204
Q0KHY3	MESH_DROME	mesh	Protein_mesh	0.568019	0.410107	0.503144
Q0KHZ4	Q0KHZ4_DROME	CG34133	CG34133,_isoform_B	0.0639701	0.538938	0.62851
Q0KHZ6	Q0KHZ6_DROME	CG7834	CG7834,_isoform_A	-0.533821	0.00555335	0.0133302
Q0KHZ9	Q0KHZ9_DROME	Cnx99A	Calnexin_99A,_isoform_C	-0.0870164	0.440612	0.533334
Q0KI00	Q0KI00_DROME	SP1029	FI20034p1	-0.116975	0.530996	0.621412
Q0KI15	Q0KI15_DROME	CG34150	CG34150	-0.996635	2.27588e-06	2.26416e-05
Q0KI39	Q0KI39_DROME	CG17271-RB	CG17271,_isoform_B	-0.290232	0.326118	0.415419
Q0KI50	DMDD_DROME	Dys	Dystrophin,_isoform_D	-0.238653	0.0481123	0.0850814
Q0KI58	Q0KI58_DROME	PP2A-B'	PP2A-B',_isoform_D	0.0137774	0.852741	0.89173
Q0KI66	Q0KI66_DROME	Mhcl	Myosin_heavy_chain-like,_isoform_F	-0.263344	0.0405789	0.0736253
Q0KI81	Q0KI81_DROME	CG14713	CG42327	-0.143614	0.0986085	0.154574
Q0KI87	Q0KI87_DROME	CG11872	CG11870,_isoform_A	-0.333836	0.00465905	0.0114966
Q0KI92	Q0KI92_DROME	CG12814	CG12814,_isoform_B	-0.0100082	0.957277	0.970216
Q0KI96	Q0KI96_DROME	ps	Pasilla,_isoform_K	-0.90923	4.00879e-06	3.48446e-05
Q0KI97	Q0KI97_DROME	CG34117	CG34117	-0.695588	0.000122148	0.000537364
Q0KI98	Q0KI98_DROME	Aats-trp	FI06027p	0.340376	0.00905875	0.020178
Q0KIA8	Q0KIA8_DROME	CG1041	CG1041,_isoform_B	-0.0329881	0.825735	0.871166
Q0KIE6	Q0KIE6_DROME	CG12582	CG12582,_isoform_B	0.788203	3.04857e-05	0.00017209
Q0KIE7	Q0KIE7_DROME	Ank	Ankyrin,_isoform_B	-0.38225	0.00067251	0.00224051
Q0KIF4	Q0KIF4_DROME	Eph	Eph_receptor_tyrosine_kinase,_isoform_A	0.161598	0.305499	0.394786
Q10714	ACE_DROME	Ance	Angiotensin-converting_enzyme	0.0199677	0.893202	0.92266
Q1LZ08	WDR48_DROME	CG9062	WD_repeat-containing_protein_48_homolog	-0.15361	0.10553	0.163991
Q1RL12	Q1RL12_DROME	nrv2	IP16413p	0.213898	0.233444	0.31758
Q1WWH6	Q1WWH6_DROME	stumps	RE42507p	0.325209	0.022606	0.0446083
Q23976	KU70_DROME	Irbp	ATP-dependent_DNA_helicase_2_subunit_1	1.23385	1.34535e-08	4.21276e-07
Q23979	MY61F_DROME	Myo61F	Myosin-IB	-0.085456	0.548955	0.636849
Q23983	SNAP_DROME	Snap	Soluble_NSF_attachment_protein	0.0629667	0.536783	0.626369
Q23997	C5210_DROME	CG5210	Chitinase-like_protein_CG5210	0.597472	0.0070029	0.0161462
Q24007	Q24007_DROME	Gp150	Gp150_protein	0.949572	0.000383448	0.00140309
Q24020	FLII_DROME	fliI	Protein_flightless-1	-0.272258	0.0790988	0.128648
Q24050	Q24050_DROME	anon-i1	Anon-i1_protein	-0.528919	4.73103e-05	0.000245798
Q24090	Q24090_DROME	Snr1	GH08712p	-0.0459763	0.736125	0.798595
Q24114	DALY_DROME	dally	Division_abnormally_delayed_protein	-0.342934	0.0508861	0.0892951
Q24133	DNAJ1_DROME	DnaJ-1	DnaJ_protein_homolog_1	-0.292719	0.0050859	0.0123557
Q24134	NELFD_DROME	TH1	Negative_elongation_factor_D	-0.0930866	0.341495	0.432595
Q24145	SHARK_DROME	shark	Tyrosine-protein_kinase_shark	-0.2129	0.00620657	0.0145778
Q24151-2	STAT_DROME	Stat92E	Isoform_C_of_Signal_transducer_and_transcription_activator	-0.242574	0.0505636	0.0887917
Q24157	BRN_DROME	brn	Beta-1,3-galactosyltransferase_brn	0.268509	0.215025	0.297517
Q24179	SLY1_DROME	Slh	Protein_sly1_homolog	0.255628	0.00564058	0.0135067
Q24185	HOOK_DROME	hk	Protein_hook	-0.0278234	0.737847	0.799771
Q24186	RS5A_DROME	RpS5a	40S_ribosomal_protein_S5a	-0.665584	9.0854e-06	6.55948e-05
Q24192	RHOL_DROME	RhoL	Ras-like_GTP-binding_protein_RhoL	0.391211	0.00200724	0.00564004
Q24208	IF2G_DROME	eIF-2gamma	Eukaryotic_translation_initiation_factor_2_subunit_3	0.197571	0.0297671	0.0563702
Q24210	CSKP_DROME	CASK	Peripheral_plasma_membrane_protein_CASK	0.282803	0.102664	0.160032
Q24212	STNB_DROME	stnB	Protein_stoned-B	0.900149	0.0158666	0.0328582
Q24214	CANB2_DROME	CanB2	Calcineurin_subunit_B_type_2	-1.05829	1.27765e-05	8.54713e-05
Q24216	Q24216_DROME	Cdk7	Cyclin-dependent_kinase_7	0.379245	0.00135212	0.00400297
Q24238	APH4_DROME	Aph-4	Alkaline_phosphatase_4	0.103549	0.676002	0.749315
Q24247	ITA1_DROME	mew	Integrin_alpha-PS1	0.036016	0.671151	0.745163
Q24251	ATP5H_DROME	ATPsyn-d	ATP_synthase_subunit_d,_mitochondrial	-0.554804	0.00135516	0.00400961
Q24253	Q24253_DROME	AP-1-2beta	Beta_adaptin	-0.242702	0.00420875	0.0105198
Q24276	CDC37_DROME	Cdc37	Hsp90_co-chaperone_Cdc37	-0.568376	9.07851e-06	6.55948e-05
Q24297	RUXF_DROME	SmF	Small_nuclear_ribonucleoprotein_F	-0.369332	0.000299012	0.00113476
Q24298	CADE_DROME	shg	DE-cadherin	0.177272	0.393898	0.487047
Q24307	IAP2_DROME	Iap2	Apoptosis_2_inhibitor	-0.579991	0.000139354	0.000601991
Q24311	CUL1_DROME	lin19	Cullin_homolog_1	-0.29759	0.000352015	0.0013023
Q24314	VPS18_DROME	dor	Vacuolar_protein_sorting-associated_protein_18_homolog	-0.0482051	0.510801	0.601421
Q24318	TFDP_DROME	Dp	Transcription_factor_Dp	-1.01358	6.89989e-06	5.22064e-05
Q24319	OST48_DROME	Ost48	Dolichyl-diphosphooligosaccharide--protein_glycosyltransferase_48_kDa_subunit	0.186061	0.0401731	0.0729681
Q24323	SEM2A_DROME	Sema-2a	Semaphorin-2A	0.0283652	0.910514	0.934318
Q24324	DSOR1_DROME	Dsor1	Dual_specificity_mitogen-activated_protein_kinase_kinase_dSOR1	0.0915618	0.19543	0.273874
Q24368	ISWI_DROME	Iswi	Chromatin-remodeling_complex_ATPase_chain_Iswi	0.0977421	0.596431	0.679934
Q24372	LACH_DROME	Lac	Lachesin	0.0860725	0.477905	0.570172
Q24388	LSP2_DROME	Lsp2	Larval_serum_protein_2	0.0271488	0.912352	0.935822
Q24407	ATP5J_DROME	ATPsyn-Cf6	ATP_synthase-coupling_factor_6,_mitochondrial	-0.955015	4.07607e-05	0.000216605
Q24439	ATPO_DROME	Oscp	ATP_synthase_subunit_O,_mitochondrial	-0.479314	0.000805971	0.00260902
Q24451	MAN2_DROME	alpha-Man-II	Alpha-mannosidase_2	-0.151595	0.0811587	0.131146
Q24468	Q24468_DROME	put	Punt	0.790925	2.17437e-07	3.66173e-06
Q24472	RBF_DROME	Rbf	Retinoblastoma_family_protein	-0.679216	1.40234e-06	1.56489e-05
Q24478	CP190_DROME	Cp190	Centrosome-associated_zinc_finger_protein_CP190	-0.209345	0.209877	0.291438
Q24491	RX21_DROME	Rsf1	RNA-binding_protein_Rsf1	-0.589867	0.000694079	0.00229714
Q24492	RFA1_DROME	RpA-70	Replication_protein_A_70_kDa_DNA-binding_subunit	0.960842	7.21094e-07	9.12538e-06
Q24498-3	RY44_DROME	Rya-r44F	Isoform_B_of_Ryanodine_receptor_44F	-0.970577	0.00138508	0.00408612
Q24522	BUN1_DROME	bun	Protein_bunched,_class_1/class_3/D/E_isoforms	0.0275297	0.729792	0.794125
Q24523	BUN2_DROME	bun	Protein_bunched,_class_2/F/G_isoform	0.0388297	0.831834	0.875761
Q24547	STX1A_DROME	Syx1A	Syntaxin-1A	0.121488	0.443315	0.535921
Q24560	TBB1_DROME	betaTub56D	Tubulin_beta-1_chain	-0.220166	0.0228676	0.0450008
Q24564	MERH_DROME	Mer	Moesin/ezrin/radixin_homolog_2	-0.725104	1.01884e-06	1.20156e-05
Q24574	UBPE_DROME	Ubp64E	Ubiquitin_carboxyl-terminal_hydrolase_64E	0.307003	0.0041364	0.0103699
Q24583	VATF1_DROME	Vha14-1	V-type_proton_ATPase_subunit_F_1	0.37602	0.0173121	0.0355004
Q24592	JAK_DROME	hop	Tyrosine-protein_kinase_hopscotch	-0.444356	0.000217627	0.000871163
Q26365	ADT_DROME	sesB	ADP,ATP_carrier_protein	0.113659	0.446624	0.538996
Q26454	MCM4_DROME	dpa	DNA_replication_licensing_factor_MCM4	0.278396	0.141586	0.209489
Q26459	Q26459_DROME	Msr-110	LD44960p	0.961151	0.0392734	0.0716187
Q27237	TID_DROME	l(2)tid	Protein_tumorous_imaginal_discs,_mitochondrial	-0.577526	0.00116987	0.00354703
Q27268	DX39B_DROME	Hel25E	ATP-dependent_RNA_helicase_WM6	0.0724796	0.376377	0.468861
Q27272	TAF9_DROME	e(y)1	Transcription_initiation_factor_TFIID_subunit_9	-0.0992666	0.41949	0.512778
Q27294	CAZ_DROME	caz	RNA-binding_protein_cabeza	0.0342113	0.731912	0.795622
Q27333	NT56_DROME	l(2)not	Lethal(2)neighbour_of_tid_protein	0.13639	0.231723	0.31558
Q27411	Q27411_DROME	Rlb1	Rlb1	0.28751	0.00925998	0.0205305
Q27415	NLP_DROME	Nlp	Nucleoplasmin-like_protein	0.452978	0.000999639	0.00311164
Q27421	OSP_DROME	osp	Protein_outspread	-0.37441	0.0241375	0.0472591
Q27580	SAHH_DROME	Ahcy13	Adenosylhomocysteinase	0.52063	0.0122129	0.0260321
Q27589	CP4D2_DROME	Cyp4d2	Cytochrome_P450_4d2	0.803819	0.00133156	0.00395609
Q27591	ITBN_DROME	Itgbetanu	Integrin_beta-nu	0.349447	0.191403	0.269133
Q27593	CP6A8_DROME	Cyp6a8	Cytochrome_P450_6a8	1.30222	1.4317e-06	1.5853e-05
Q27594	CP6A9_DROME	Cyp6a9	Cytochrome_P450_6a9	1.51743	4.07268e-05	0.000216605
Q27601	PUR1_DROME	Prat	Amidophosphoribosyltransferase	0.088817	0.282313	0.370711
Q27606	CP4E2_DROME	Cyp4e2	Cytochrome_P450_4e2	0.203692	0.188622	0.266158
Q27607	DPOG1_DROME	tam	DNA_polymerase_subunit_gamma-1,_mitochondrial	-0.352047	0.00203692	0.00570112
Q27869	PIMT_DROME	Pcmt	Protein-L-isoaspartate(D-aspartate)_O-methyltransferase	-0.156486	0.0859831	0.137617
Q29QE1	Q29QE1_DROME	RhoGAP1A	GH15984p	0.0137573	0.88763	0.91815
Q29QQ9	Q29QQ9_DROME	Rrp42	IP10364p	-0.409082	2.79614e-05	0.000159816
Q29R02	Q29R02_DROME	CG4360	CG4360,_isoform_B	0.164244	0.260077	0.346402
Q29R16	Q29R16_DROME	ome	LP13067p	-0.308349	0.00574965	0.0137031
Q2M1E6	Q2M1E6_DROME	Cdep	Cdep,_isoform_E	0.183055	0.0106818	0.0231715
Q2PDM3	Q2PDM3_DROME	CG33978	CG33978,_isoform_C	-0.640674	3.53806e-05	0.00019363
Q2PDU0	Q2PDU0_DROME	NimB3	Nimrod_B3	2.09886	3.03504e-06	2.82895e-05
Q2PDX2	Q2PDX2_DROME	CG34001	CG34001,_isoform_B	2.54228	5.76129e-12	2.63134e-09
Q2PDY3	Q2PDY3_DROME	CG7255	CG7255,_isoform_F	2.09266	2.65365e-06	2.55401e-05
Q2PE14	ZCHC8_DROME	CG4622	Zinc_finger_CCHC_domain-containing_protein_8_homolog	-0.588914	3.02286e-07	4.78963e-06
Q2PE16	Q2PE16_DROME	CG13516-RA	CG13516	0.417737	0.00148638	0.0043416
Q32KD2	SETB1_DROME	egg	Histone-lysine_N-methyltransferase_eggless	0.234144	0.25877	0.34521
Q32KD3	Q32KD3_DROME	CG2747	CG2747,_isoform_D	-0.0497673	0.402357	0.495452
Q32KD4	Q32KD4_DROME	AGO1	Argonaute-1,_isoform_A	-0.294238	0.00104105	0.0032139
Q3KN54	Q3KN54_DROME	CG14435	CG14435,_isoform_B	-0.309439	0.0103793	0.0226327
Q3YMU0	Q3YMU0_DROME	ERp60	ERp60_(Fragment)	0.173612	0.165866	0.239595
Q45VV3	YORKI_DROME	yki	Protein_yorkie	-0.547862	0.000937684	0.00295912
Q494G8	Q494G8_DROME	fbl6	Fbl6,_isoform_A	-0.0938463	0.53012	0.620532
Q4AB31	Q4AB31_DROME	gish	Gilgamesh,_isoform_G	0.0739842	0.317533	0.406649
Q4LDP6	Q4LDP6_DROME	mus201	Mutagen-sensitive_201,_isoform_A	0.835591	2.07267e-05	0.000125762
Q4QPU3	Q4QPU3_DROME	CG15908	CG15908,_isoform_A	-0.528793	0.00400791	0.0101083
Q4QQ12	Q4QQ12_DROME	CG11110	CG11110	-0.489881	0.000573754	0.00196358
Q4U2G8	Q4U2G8_DROME	CG11961	CG11961,_isoform_A	0.29137	0.0441081	0.0791425
Q4V3Z5	Q4V3Z5_DROME	CG11788	CG11788	2.19386	1.34019e-12	2.24437e-09
Q4V429	Q4V429_DROME	CG13018	CG13018	-0.769761	0.020339	0.0406943
Q4V4D1	Q4V4D1_DROME	CG18765	CG18765	0.0988197	0.886382	0.91777
Q4V4P1	Q4V4P1_DROME	CG12868	CG12868	1.22885	9.3017e-08	1.91416e-06
Q4V5H1	Q4V5H1_DROME	CG17266	Peptidyl-prolyl_cis-trans_isomerase	0.0219041	0.904115	0.929631
Q4V604	Q4V604_DROME	CG32202	CG32202	0.0702178	0.64964	0.72885
Q4V6J1	Q4V6J1_DROME	GstE10	Glutathione_S_transferase_E10	-0.334677	0.285724	0.374407
Q4V6M1	Q4V6M1_DROME	Apf	Diadenosine_tetraphosphate_hydrolase	-0.58812	0.174333	0.249815
Q4V6M7	UFSP1_DROME	UFSP1	Probable_Ufm1-specific_protease_1	0.0510079	0.76926	0.824976
Q4V6X9	Q4V6X9_DROME	CG17385	CG17385	-0.721655	5.08261e-05	0.000260296
Q4Z8K6	RBP9X_DROME	RanBPM	Ran-binding_proteins_9/10_homolog	-0.126433	0.0418222	0.0755809
Q500Y7	Q500Y7_DROME	CG14482	CG14482	-0.979924	5.57299e-05	0.000279428
Q58CJ5	Q58CJ5_DROME	sals	CG31374,_isoform_D	-0.800978	9.14156e-05	0.000424858
Q59DP9	Q59DP9_DROME	PMCA	Plasma_membrane_calcium_ATPase,_isoform_J	0.0487647	0.75541	0.813718
Q59DT9	Q59DT9_DROME	Nf1	Neurofibromin_1,_isoform_D	-0.302839	0.0264124	0.0510566
Q59E01	Q59E01_DROME	CG9795-RD	CG9795,_isoform_D	-0.1198	0.357296	0.449213
Q59E06	Q59E06_DROME	CG1161	CG1161,_isoform_B	0.214537	0.0460076	0.0819944
Q59E09	Q59E09_DROME	AcCoAS	Acetyl_coenzyme_A_synthase,_isoform_D	2.03124	5.02402e-05	0.00025804
Q59E30	Q59E30_DROME	fax	Failed_axon_connections,_isoform_C	-0.390986	0.124688	0.188458
Q59E33	Q59E33_DROME	scaf6	LD21442p	0.271962	0.00496746	0.0121089
Q59E58	Q59E58_DROME	zip	Zipper,_isoform_C	0.319624	0.0467826	0.0831396
Q5BI50	Q5BI50_DROME	Cul-4	Cullin-4,_isoform_A	0.187059	0.177819	0.2537
Q5BIA9	Q5BIA9_DROME	CG8613	CG8613	-0.327078	0.00140535	0.00413134
Q5BIE4	Q5BIE4_DROME	CG15096	CG15096,_isoform_A	-0.0818086	0.734373	0.79763
Q5BIL9	Q5BIL9_DROME	CG18278	CG18278	0.627137	5.83407e-05	0.000291066
Q5EAK6	ATM_DROME	tefu	Serine/threonine-protein_kinase_ATM	1.26112	2.74793e-08	7.24834e-07
Q5KTT4	Q5KTT4_DROME	NAT1	NAT1,_isoform_C_(Fragment)	0.724772	9.73382e-08	1.97188e-06
Q5LJP6	Q5LJP6_DROME	CG17698	CG17698,_isoform_D	0.705307	2.34674e-06	2.30725e-05
Q5LJZ2	Q5LJZ2_DROME	Set1	Set1,_isoform_A	0.160754	0.125769	0.189692
Q5U0V7	Q5U0V7_DROME	synj	GH06496p	0.360873	0.00521338	0.0126348
Q5U0X8	Q5U0X8_DROME	CG12325	CG12325	1.2167	3.36731e-09	1.55205e-07
Q5U0Y0	Q5U0Y0_DROME	Sin3A	LD13852p	-0.0779964	0.507587	0.598633
Q5U117	Q5U117_DROME	Egm	Enigma	-0.551753	0.000370643	0.00136318
Q5U124	Q5U124_DROME	Mal-A5	CG30359,_isoform_A	0.856615	1.48234e-06	1.62605e-05
Q5U127	Q5U127_DROME	Dcp2	Decapping_protein_2,_isoform_E	0.0764985	0.487566	0.579359
Q5U156	Q5U156_DROME	row	RE01954p	-0.0303742	0.803216	0.8517
Q5U191	Q5U191_DROME	CG1882	CG1882,_isoform_A	0.76273	0.000876317	0.00279531
Q5U1B0	Q5U1B0_DROME	CG10131	CG10131	1.2104	3.08298e-08	7.86237e-07
Q6AWN0	MTND_DROME	CG32068	1,2-dihydroxy-3-keto-5-methylthiopentene_dioxygenase	0.283402	0.0517139	0.0905264
Q6IDE2	Q6IDE2_DROME	CG3907	CG3907,_isoform_A	0.0675486	0.706827	0.775011
Q6IDF5	Q6IDF5_DROME	CG12859	CG12859	-0.398861	0.0112761	0.0243138
Q6IGN6	Q6IGN6_DROME	CG34228	CG34228	-0.222572	0.0294437	0.0559623
Q6IGW6	Q6IGW6_DROME	CG34200	CG34200	-0.621705	0.000146156	0.000624924
Q6II06	Q6II06_DROME	CG33635	CG33635	0.0714271	0.556888	0.644062
Q6IIA4	Q6IIA4_DROME	CG34015-RA	CG34015	-0.0303664	0.841104	0.882746
Q6IJR5	Q6IJR5_DROME	CG34284	CG34284	1.49729	0.00662202	0.0154095
Q6IL18	Q6IL18_DROME	CG43085	CG43085,_isoform_A	1.39733	4.96623e-05	0.000255787
Q6IM52	Q6IM52_DROME	CG34199	CG34199	0.122226	0.90127	0.928055
Q6NL44	Q6NL44_DROME	CG31188	CG33722,_isoform_B	0.129023	0.168747	0.243197
Q6NLA3	Q6NLA3_DROME	Vha100-1	RE25460p	0.219432	0.0738643	0.12203
Q6NN40	NTM1_DROME	Ntmt	Alpha_N-terminal_protein_methyltransferase_1	-0.155558	0.173799	0.249191
Q6NNB2	Q6NNB2_DROME	CG8777	CG8777	-0.297008	0.0101358	0.0221884
Q6NND8	Q6NND8_DROME	sm	RE74969p	-0.739059	1.99422e-05	0.000122332
Q6NNF2	Q6NNF2_DROME	Pde8	Phosphodiesterase_8,_isoform_A	-0.701595	1.84499e-06	1.93512e-05
Q6NP69	Q6NP69_DROME	gfzf	GST-containing_FLYWCH_zinc-finger_protein	0.0411902	0.704659	0.773646
Q6NP72	Q6NP72_DROME	CG13220	CG13220	-0.766385	4.45136e-07	6.31741e-06
Q6NP91	Q6NP91_DROME	CG11210	CG11210	-0.112729	0.172456	0.247619
Q6NPA6	Q6NPA6_DROME	par-1	Par-1,_isoform_L	-0.401716	0.0161869	0.0334703
Q6NPB2	Q6NPB2_DROME	CG8317	CG8317	1.13622	0.00835884	0.0188486
Q6NQY9	Q6NQY9_DROME	CG9143	CG9143	2.04764	6.83265e-13	1.71636e-09
Q6NR30	Q6NR30_DROME	BEST:LD13441	CG14478,_isoform_A	-0.1881	0.249889	0.336039
Q6NR46	Q6NR46_DROME	Spt-I	RE58623p	0.435227	0.00735718	0.0168778
Q6WV17	GALT5_DROME	pgant5	Polypeptide_N-acetylgalactosaminyltransferase_5	0.135884	0.32109	0.410472
Q6WV19	GALT2_DROME	pgant2	Polypeptide_N-acetylgalactosaminyltransferase_2	-0.354064	0.245404	0.330716
Q6XPX3	Q6XPX3_DROME	sPLA2	FI07253p	1.23197	8.87388e-06	6.45186e-05
Q709R6	Q709R6_DROME	bocksbeutel	Bocksbeutel_alpha	0.896127	4.78244e-06	3.9714e-05
Q70PP2	SMG1_DROME	nonC	Serine/threonine-protein_kinase_Smg1	-0.0767731	0.23086	0.314747
Q70PY2	PGSB1_DROME	PGRP-SB1	Peptidoglycan-recognition_protein_SB1	2.0592	1.67622e-09	8.92258e-08
Q76NQ0	Q76NQ0_DROME	CG33303	CG33303,_isoform_A	0.180634	0.0621163	0.105455
Q76NR6	Q76NR6_DROME	regucalcin	Regucalcin,_isoform_D	1.53247	1.28516e-07	2.41683e-06
Q76NS2	Q76NS2_DROME	CG10353	Anoctamin	1.49957	7.65286e-10	5.41265e-08
Q7JMZ0	Q7JMZ0_DROME	Ric	RIC_(Ras_which_interacts_with_Calmodulin)	0.0594239	0.778905	0.832069
Q7JN06	Q7JN06_DROME	BEAF-32	Boundary_element_associated_factor	0.370078	0.0367913	0.0675583
Q7JNE1	Q7JNE1_DROME	prod	Non-histone_chromosomal_protein_Prod	0.113295	0.41224	0.505022
Q7JQ32	Q7JQ32_DROME	Gyc76C	Guanylate_cyclase	0.14516	0.0800988	0.129702
Q7JQG5	Q7JQG5_DROME	ckn	CG12424,_isoform_A	0.184096	0.26105	0.347513
Q7JQH9	Q7JQH9_DROME	whd	LD31742p	0.193985	0.0744516	0.122718
Q7JQI1	Q7JQI1_DROME	CG8830	CG8830,_isoform_A	-0.331809	0.00212253	0.00590452
Q7JQL5	Q7JQL5_DROME	Atg9	Autophagy-specific_gene_9	-0.190483	0.0774978	0.126636
Q7JQN4	Q7JQN4_DROME	Rs1	LD15481p	1.67629	2.66294e-11	5.87581e-09
Q7JQR3	Q7JQR3_DROME	CG4670	Sulfhydryl_oxidase	0.115534	0.282711	0.37104
Q7JQT9	Q7JQT9_DROME	CG1671	CG1671	1.03786	1.30725e-08	4.15671e-07
Q7JQW6	LIAS_DROME	Las	Lipoyl_synthase,_mitochondrial	-0.756617	0.00060652	0.00206307
Q7JQX9	Q7JQX9_DROME	SNF4Agamma	FI14001p1	-0.545132	1.24794e-05	8.38187e-05
Q7JR49	Q7JR49_DROME	VhaAC45	CG8029,_isoform_A	0.299106	0.116379	0.1775
Q7JR58	Q7JR58_DROME	CG6543	CG6543,_isoform_A	-0.0858088	0.64009	0.720227
Q7JR71	Q7JR71_DROME	Sod3	Superoxide_dismutase_[Cu-Zn]	0.238701	0.42293	0.516481
Q7JR91	Q7JR91_DROME	Nmda1	GH12715p	0.116425	0.364323	0.456677
Q7JR99	Q7JR99_DROME	CG30094-RA	CG30094	-0.756937	0.00318861	0.00839599
Q7JRC3	Q7JRC3_DROME	Jheh1	Juvenile_hormone_epoxide_hydrolase_1	0.691183	0.00102632	0.00318116
Q7JRC9	Q7JRC9_DROME	CG30493	CG30496	0.459116	0.000130266	0.00056614
Q7JRE1	Q7JRE1_DROME	CG9171	CG9171,_isoform_C	0.198144	0.0819736	0.132126
Q7JRE4	Q7JRE4_DROME	MAN1	MAN1,_isoform_A	0.000258467	0.997213	0.998406
Q7JRF9	Q7JRF9_DROME	CG8708	CG8708,_isoform_B	0.646962	0.0381157	0.0696845
Q7JRJ9	Q7JRJ9_DROME	Incenp	Inner_centromere_protein	2.66354	3.64892e-06	3.2275e-05
Q7JRM5	Q7JRM5_DROME	CG11127	CG11127	0.448861	0.00682421	0.015814
Q7JUN3	Q7JUN3_DROME	CG2316	CG2316,_isoform_A	-0.165565	0.11885	0.180666
Q7JUP3	Q7JUP3_DROME	casp	Caspar,_isoform_A	-0.319212	0.000193977	0.000791667
Q7JUR6	GDAP2_DROME	CG18812	Protein_GDAP2_homolog	-0.159648	0.600339	0.683886
Q7JUS1	Q7JUS1_DROME	CG30491	AT09608p	-0.540209	0.00011262	0.000505633
Q7JUS9	Q7JUS9_DROME	CG9090-RA	CG9090	-0.84909	0.00951259	0.0209795
Q7JUV6	Q7JUV6_DROME	tn	Another_B-box_affiliate,_isoform_A	0.336953	0.131066	0.196677
Q7JUX9	MRRP1_DROME	trmt10c	Mitochondrial_ribonuclease_P_protein_1_homolog	-0.468013	2.26864e-05	0.000135686
Q7JV09	Q7JV09_DROME	jp	GH28348p	-0.770045	4.65855e-06	3.90333e-05
Q7JV69	Q7JV69_DROME	Spn55B	SD11922p	0.762253	0.00052431	0.00182127
Q7JV70	Q7JV70_DROME	Arc2	Arc2	4.04415	3.79663e-09	1.7184e-07
Q7JVG2	Q7JVG2_DROME	Aps	Aps,_isoform_A	-0.592093	5.37663e-06	4.33583e-05
Q7JVG6	Q7JVG6_DROME	CG1550	CG1550	0.1483	0.181064	0.257477
Q7JVH6	Q7JVH6_DROME	CG9436	CG9436	0.886231	1.35789e-05	8.98309e-05
Q7JVI3	EIF3M_DROME	Tango7	Eukaryotic_translation_initiation_factor_3_subunit_M	-0.267979	0.00202719	0.00567759
Q7JVI6	Q7JVI6_DROME	GstE13	CG11784	-0.441089	0.00438651	0.0109206
Q7JVK1	Q7JVK1_DROME	mRpL18	HL07956p	-0.47269	0.00338945	0.00884142
Q7JVK6	Q7JVK6_DROME	trsn	GM27569p	-0.208869	0.0291733	0.0555829
Q7JVK8	Q7JVK8_DROME	CG5323	CG5323	-0.284013	0.0280298	0.0537898
Q7JVL3	Q7JVL3_DROME	Prp38	GM13395p	-0.00862483	0.942259	0.958743
Q7JVP2	Q7JVP2_DROME	Rcd-1	GH15157p	-0.200671	0.0397074	0.0722006
Q7JVY0	Q7JVY0_DROME	coro	Coronin	-0.537616	1.89643e-06	1.9808e-05
Q7JVZ8	Q7JVZ8_DROME	GstE11	CG5224	0.121115	0.430689	0.524299
Q7JW03	Q7JW03_DROME	Ubc-E2H	CG2257	0.0106924	0.941983	0.958743
Q7JW07	Q7JW07_DROME	CG12935	CG12935	-1.18754	5.69405e-08	1.33677e-06
Q7JW12	TMX2_DROME	CG11007	Thioredoxin-related_transmembrane_protein_2_homolog	-0.326156	0.00666126	0.0154875
Q7JW27	WASH1_DROME	wash	WAS_protein_family_homolog_1	0.0125532	0.89085	0.920911
Q7JW61	Q7JW61_DROME	CG8494	Ubiquitin_carboxyl-terminal_hydrolase	0.117664	0.303756	0.393013
Q7JW66	Q7JW66_DROME	CG12129	CG12129	-0.0435091	0.733317	0.796874
Q7JW73	Q7JW73_DROME	CG8080	CG8080	-0.269059	0.0299107	0.0565663
Q7JWD3	ASNA_DROME	CG1598	ATPase_ASNA1_homolog	-0.0187936	0.849732	0.889201
Q7JWD6	Q7JWD6_DROME	Elongin-C	Elongin_C,_isoform_A	-0.210382	0.0619032	0.105139
Q7JWF1	Q7JWF1_DROME	Etf-QO	CG12140	-0.479768	0.00220843	0.00610632
Q7JWG9	RM52_DROME	mRpL52	39S_ribosomal_protein_L52,_mitochondrial	-0.731533	0.000216125	0.000865987
Q7JWH6	Q7JWH6_DROME	CG1888	CG1888	0.5686	0.000354034	0.00130784
Q7JWP5	Q7JWP5_DROME	Tsp42Eg	RE11685p	0.235949	0.222265	0.305599
Q7JWQ7	Q7JWQ7_DROME	Swim	CG3074,_isoform_A	1.046	3.3425e-05	0.000183527
Q7JWR4	Q7JWR4_DROME	CG13319	CG13319,_isoform_A	-0.0334118	0.678985	0.751371
Q7JWR9	ZC3HF_DROME	CG8635	Zinc_finger_CCCH_domain-containing_protein_15_homolog	-0.364363	0.00164363	0.00473756
Q7JWS8	Q7JWS8_DROME	Mtl	AT17867p	-0.201302	0.0790427	0.128598
Q7JWU9	Q7JWU9_DROME	CG14480	AT07420p	-0.743063	0.0011539	0.00351132
Q7JWV7	Q7JWV7_DROME	Tsp42Ed	SD10395p	2.43617	8.71371e-07	1.05743e-05
Q7JWW6	Q7JWW6_DROME	Ady43A	Ady43A	0.700063	0.000294529	0.00112099
Q7JWX3	Q7JWX3_DROME	nec	GH10112p	0.719553	1.71881e-05	0.00010917
Q7JX87	Q7JX87_DROME	Prx2540-2	Peroxiredoxin_2540	0.898039	0.00527366	0.0127318
Q7JX94	Q7JX94_DROME	CG30503	CG30503,_isoform_A	1.90115	2.12289e-08	5.99181e-07
Q7JX95	Q7JX95_DROME	CG11123	CG11123	0.487971	7.37548e-05	0.00035391
Q7JXA2	Q7JXA2_DROME	L	LOBE	-0.772444	1.98901e-06	2.05191e-05
Q7JXB5	Q7JXB5_DROME	CG10924	CG10924,_isoform_A	1.4187	1.41196e-05	9.26071e-05
Q7JXB9	Q7JXB9_DROME	EndoG	Endonuclease_G	-0.730607	0.00013008	0.000565819
Q7JXC4	Q7JXC4_DROME	P32	CG6459	-0.738681	1.4198e-05	9.29998e-05
Q7JXF5	Q7JXF5_DROME	Nup62	GH12838p	0.548889	8.29313e-06	6.12716e-05
Q7JXF7	Q7JXF7_DROME	sel	CG12918	0.891465	9.76876e-06	6.91617e-05
Q7JXU4	Q7JXU4_DROME	Ns2	Nuclear_GTP_binding_protein	0.0756337	0.484608	0.576526
Q7JXZ2	Q7JXZ2_DROME	Eip55E	Eip55E	0.644993	0.020458	0.0408861
Q7JY94	Q7JY94_DROME	Atg7	Autophagy-specific_gene_7,_isoform_A	0.203421	0.0795164	0.12911
Q7JY99	Q7JY99_DROME	CG8298	CG8298,_isoform_A	-0.249381	0.0194064	0.039093
Q7JYH3	Q7JYH3_DROME	CG9350	CG9350	-0.61497	0.00151069	0.00440237
Q7JYK2	Q7JYK2_DROME	CG1941	CG1941	-0.846163	0.00136437	0.00403211
Q7JYV7	KAD6_DROME	Ak6	Adenylate_kinase_isoenzyme_6_homolog	0.766056	0.000181272	0.000744043
Q7JYW9	Q7JYW9_DROME	Hex-C	Hexokinase_C	1.38697	0.000184607	0.000756497
Q7JYX2	Q7JYX2_DROME	CG2065	CG2065	2.38189	1.45885e-10	1.46586e-08
Q7JYX5	Q7JYX5_DROME	Vamp7	CG1599	0.38577	0.0181766	0.0369713
Q7JYZ0	Q7JYZ0_DROME	CG6426	CG6426	0.227947	0.150039	0.220022
Q7JZ25	Q7JZ25_DROME	ClC-b	CG8594	0.267491	0.0113525	0.0244542
Q7JZ37	Q7JZ37_DROME	CG12134	CG12134,_isoform_A	1.26573	8.61276e-09	3.13948e-07
Q7JZ53	Q7JZ53_DROME	mRpS4	CG4866,_isoform_A	1.2779	3.42844e-06	3.06485e-05
Q7JZ56	Q7JZ56_DROME	S2P	Metallo_endopeptidase	0.199529	0.0522598	0.0913229
Q7JZB1	Q7JZB1_DROME	CG12338	CG12338	0.353544	0.00602842	0.0142593
Q7JZD3	Q7JZD3_DROME	Eb1	Eb1,_isoform_A	-0.842779	7.86961e-07	9.76221e-06
Q7JZE1	Q7JZE1_DROME	Pex11	CG8315	0.230747	0.0562971	0.0972949
Q7JZE8	Q7JZE8_DROME	CG8323	CG8323	-0.619591	5.97251e-05	0.000296208
Q7JZF5	Q7JZF5_DROME	Rpb5	RE34924p	0.596717	9.16326e-06	6.58601e-05
Q7JZK1	Q7JZK1_DROME	CG7712	CG7712	-1.06377	6.33647e-06	4.92032e-05
Q7JZM8	RM41_DROME	mRpL41	39S_ribosomal_protein_L41,_mitochondrial	-0.756169	2.73248e-05	0.000156712
Q7JZR5	Q7JZR5_DROME	CG6796	CG6796	-0.251367	0.0029387	0.00781165
Q7JZW0	Q7JZW0_DROME	Cpr51A	Cuticular_protein_51A	-0.567472	0.0807858	0.13063
Q7JZZ3	Q7JZZ3_DROME	CG13321	CG13321	0.694856	0.286143	0.374761
Q7K012	Q7K012_DROME	Bap55	Brahma_associated_protein_55kD	-0.185599	0.124551	0.188307
Q7K025	Q7K025_DROME	CG11892	CG11892,_isoform_A	1.04994	0.0972733	0.15291
Q7K084	Q7K084_DROME	Obp44a	Obp44a	0.762569	0.00569009	0.0135935
Q7K0A0	Q7K0A0_DROME	mRpL42	Mitochondrial_ribosomal_protein_L42	-0.789783	6.46254e-06	4.98738e-05
Q7K0B6	Q7K0B6_DROME	GstT1	CG30000	-0.0533349	0.637185	0.717601
Q7K0D3	Q7K0D3_DROME	CG12909	CG12909	0.924157	8.25889e-07	1.01202e-05
Q7K0D8	Q7K0D8_DROME	Nup50	CG2158	0.369592	0.0186328	0.0377465
Q7K0E3	MOB4_DROME	Mob4	MOB_kinase_activator-like_4	0.000954889	0.990892	0.993597
Q7K0E6	Q7K0E6_DROME	Aats-asp	Aspartyl-tRNA_synthetase	0.0570515	0.71126	0.779022
Q7K0F7	Q7K0F7_DROME	CG11200	CG11200,_isoform_A	-0.339842	0.0570247	0.0983496
Q7K0H4	Q7K0H4_DROME	stj	SD07723p	-0.587458	0.000674008	0.00224401
Q7K0I7	Q7K0I7_DROME	CG8034	CG8034,_isoform_B	0.47502	0.0126676	0.0268531
Q7K0K1	Q7K0K1_DROME	CG2063	CG2063	0.0560028	0.781303	0.833744
Q7K0L5	Q7K0L5_DROME	veil	LP01562p	-0.140133	0.287004	0.375791
Q7K0L7	Q7K0L7_DROME	Tpc1	CG6608,_isoform_A	-0.245732	0.00829469	0.0187292
Q7K0L8	Q7K0L8_DROME	FLASH	CG4616,_isoform_A	0.569179	0.000397747	0.00144698
Q7K0P0	Q7K0P0_DROME	JhI-26	Juvenile_hormone-inducible_protein_26	0.963127	2.63931e-06	2.54508e-05
Q7K0Q2	Q7K0Q2_DROME	Ranbp11	LD41918p	-0.0247825	0.778828	0.832069
Q7K0S1	Q7K0S1_DROME	CG14764	CG14764	-0.1653	0.065659	0.11061
Q7K0S5	Q7K0S5_DROME	Gint3	GDI_interacting_protein_3,_isoform_B	-0.0066989	0.923427	0.9449
Q7K0V7	Q7K0V7_DROME	CG8272	CG8272	-0.117655	0.390833	0.484109
Q7K0W1	Q7K0W1_DROME	CG8531	CG8531	-0.366655	0.00171346	0.00491067
Q7K0X3	Q7K0X3_DROME	CG2469	CG2469,_isoform_A	0.304322	0.00256412	0.00697462
Q7K0X9	Q7K0X9_DROME	Syx7	LD23667p	-0.0145059	0.832131	0.875891
Q7K0Y1	BOP1_DROME	CG5033	Ribosome_biogenesis_protein_BOP1_homolog	0.660559	3.86379e-07	5.67593e-06
Q7K110	Q7K110_DROME	OstDelta	CG6370	0.185169	0.0866919	0.138575
Q7K112	Q7K112_DROME	twin	LD18435p	-0.275143	0.00129225	0.00384841
Q7K126	Q7K126_DROME	Not3	LD13864p	-0.343708	0.00991552	0.021763
Q7K127	Q7K127_DROME	CG7997	CG7997,_isoform_A	0.78994	0.0153402	0.0319259
Q7K130	Q7K130_DROME	CG12042	CG12042	-0.241465	0.00201216	0.00564688
Q7K137	Q7K137_DROME	Lnk	LD10453p	-0.206023	0.0936966	0.148262
Q7K148	Q7K148_DROME	Prosbeta5	Proteasome_subunit_beta_type	-0.351666	0.000311251	0.00116783
Q7K159	Q7K159_DROME	mip40	LD06557p	-0.401697	0.00216093	0.00599833
Q7K161	Q7K161_DROME	CG6805	CG6805	-0.73546	8.54066e-06	6.27314e-05
Q7K172	Q7K172_DROME	ste24a	LD04933p	-0.0399439	0.633391	0.714129
Q7K180	Q7K180_DROME	Map60	LD02709p	0.0292916	0.895682	0.923626
Q7K1C0	Q7K1C0_DROME	CG3436	CG11455,_isoform_A	-0.869552	2.30293e-05	0.00013741
Q7K1C3	Q7K1C3_DROME	CG6984	CG6984	-0.68408	0.000642783	0.00215721
Q7K1C5	Q7K1C5_DROME	CG6406	CG6406,_isoform_A	-0.215155	0.014216	0.0297713
Q7K1H0	Q7K1H0_DROME	CG6491	CG32066,_isoform_B	0.226617	0.0116587	0.0249886
Q7K1H5	Q7K1H5_DROME	CG11808	CG11808	-0.189297	0.0226512	0.0446623
Q7K1I4	Q7K1I4_DROME	Tsp42Ea	GH05668p	0.0791193	0.762016	0.819428
Q7K1L4	Q7K1L4_DROME	CG8468	CG8468,_isoform_A	-0.40851	0.230063	0.313915
Q7K1M4	Q7K1M4_DROME	CG1902	CG1902,_isoform_A	0.071701	0.443619	0.535921
Q7K1Q7	Q7K1Q7_DROME	RpLP0-like	CG1381	0.888035	4.97962e-07	6.87296e-06
Q7K1R6	Q7K1R6_DROME	CG10916	CG10916	0.911374	6.77089e-08	1.51487e-06
Q7K1S1	Q7K1S1_DROME	CG8067	CG8067	-0.827726	7.32301e-07	9.22075e-06
Q7K1U0	Q7K1U0_DROME	Arc1	Arc1	3.70809	3.34262e-11	6.00965e-09
Q7K1V1	Q7K1V1_DROME	CG8441	CG8441	-0.0427716	0.813097	0.861087
Q7K1W4	Q7K1W4_DROME	Jheh3	Juvenile_hormone_epoxide_hydrolase_3	0.437376	0.00928148	0.0205691
Q7K1W5	Q7K1W5_DROME	CG8187	CG8187	-0.133311	0.0698106	0.116676
Q7K1Y4	CIAO1_DROME	Ciao1	Probable_cytosolic_iron-sulfur_protein_assembly_protein_Ciao1	0.196195	0.0971182	0.152731
Q7K1Z5	UFC1_DROME	CG8386	Ubiquitin-fold_modifier-conjugating_enzyme_1	0.0913705	0.31584	0.405204
Q7K204	Q7K204_DROME	barc	Barricade,_isoform_A	-0.318151	0.0047186	0.011615
Q7K209	Q7K209_DROME	CG8525	CG8525	0.402659	0.0254129	0.0494288
Q7K231	Q7K231_DROME	CG7747	CG7747	0.148888	0.600624	0.683938
Q7K274	Q7K274_DROME	l(2)k09913	LD15586p	-0.519613	0.00450964	0.0111773
Q7K284	CLP1_DROME	cbc	Protein_CLP1_homolog	-0.57181	0.000850749	0.0027311
Q7K2B0	RRP8_DROME	CG7137	Ribosomal_RNA-processing_protein_8	1.41405	1.30023e-09	7.50847e-08
Q7K2D2	DCTN2_DROME	Dmn	Probable_dynactin_subunit_2	-0.34298	4.0786e-05	0.000216605
Q7K2E1	Q7K2E1_DROME	CG8839	CG8839,_isoform_A	0.535449	0.000795742	0.0025809
Q7K2G1-2	ADRM1_DROME	Rpn13	Isoform_2_of_Proteasomal_ubiquitin_receptor_ADRM1_homolog	0.151062	0.219479	0.302188
Q7K2L1	Q7K2L1_DROME	lat	AT22044p1	0.872423	0.010436	0.0227366
Q7K2L7	Q7K2L7_DROME	CG17765	CG17765	-0.375714	0.276693	0.36457
Q7K2N0	Q7K2N0_DROME	CG8735	CG8735	-0.149487	0.0812069	0.131146
Q7K2Q8	Q7K2Q8_DROME	CG10153	CG10153	-0.4953	0.000203006	0.00082383
Q7K2V9	Q7K2V9_DROME	CG16804	CG33671	-0.11508	0.198102	0.277156
Q7K2W3	Q7K2W3_DROME	CG8785	CG8785,_isoform_A	-0.0822399	0.837504	0.879999
Q7K2W6	Q7K2W6_DROME	proPO-A1	GH04080p	0.169598	0.581468	0.666506
Q7K2X5	Q7K2X5_DROME	CG14762	CG14762	0.397465	0.146925	0.216087
Q7K2X8	Q7K2X8_DROME	Nup44A	Nup44A,_isoform_A	0.273181	0.000439858	0.00156727
Q7K332	Q7K332_DROME	CG3364	CG30159,_isoform_A	-0.489663	1.93013e-05	0.000119863
Q7K3B7	Q7K3B7_DROME	CG11208	CG11208	0.374056	0.0352508	0.0652303
Q7K3D4	Q7K3D4_DROME	CG5482	CG5482	0.148778	0.234116	0.318321
Q7K3D8	Q7K3D8_DROME	DMAP1	DMAP1	-0.327362	0.0396891	0.0721934
Q7K3E2	Q7K3E2_DROME	CG5080	CG5080,_isoform_A	-0.117273	0.073306	0.121267
Q7K3H0	Q7K3H0_DROME	Pi3K68D	LD28067p	-0.0707275	0.450911	0.543517
Q7K3J0	Q7K3J0_DROME	CG8258	CG8258	-0.00014106	0.998567	0.999163
Q7K3M5	Q7K3M5_DROME	CG11107	CG11107	0.353581	0.000355785	0.00131334
Q7K3M6	Q7K3M6_DROME	CG8654-RA	CG8654	0.182736	0.566547	0.653128
Q7K3N4	Q7K3N4_DROME	CG8888	CG8888	0.627772	0.0328705	0.0613173
Q7K3P0	Q7K3P0_DROME	CG8257	CG8257	-0.559582	1.83116e-05	0.000114425
Q7K3U4	Q7K3U4_DROME	Fmo-2	Flavin-containing_monooxygenase_2	1.42608	2.75673e-05	0.000157923
Q7K3V6	Q7K3V6_DROME	CG12736	AT01345p	-0.426379	0.00201305	0.00564688
Q7K3W2	Q7K3W2_DROME	CG8728-RA	CG8728	-0.552008	0.0011722	0.00355194
Q7K3W4	Q7K3W4_DROME	qsm	GH08941p	-0.113178	0.478211	0.570353
Q7K3Z3	Q7K3Z3_DROME	p47	GH01724p	-0.0249306	0.739808	0.801508
Q7K3Z8	Q7K3Z8_DROME	CG17292	CG17292,_isoform_A	0.880924	5.01048e-07	6.89662e-06
Q7K483	Q7K483_DROME	CG7943	CG7943,_isoform_A	-0.768851	1.12078e-06	1.28851e-05
Q7K485	Q7K485_DROME	cathD	CathD	0.711808	6.5194e-06	5.01619e-05
Q7K486	ARMC6_DROME	CG5721	Armadillo_repeat-containing_protein_6_homolog	-0.188336	0.0622899	0.105689
Q7K4B2	Q7K4B2_DROME	CG7845	CG7845	0.3963	0.00225057	0.00620573
Q7K4B3	ELP2_DROME	Elp2	Probable_elongator_complex_protein_2	0.00422803	0.963495	0.975534
Q7K4C2	Q7K4C2_DROME	CG7737	CG7737	0.633107	0.000237626	0.000939285
Q7K4C7	Q7K4C7_DROME	Cct1	CTP:phosphocholine_cytidylyltransferase_1,_isoform_A	0.419414	0.0796437	0.129185
Q7K4G8	Q7K4G8_DROME	CG12391	CG12391	-0.151548	0.355435	0.447433
Q7K4I5	Q7K4I5_DROME	CG8892-RB	AT08017p	-0.338702	0.000615876	0.00208642
Q7K4L8	Q7K4L8_DROME	CG7878	CG7878	0.493519	0.000110612	0.000497506
Q7K4L9	Q7K4L9_DROME	CG8405	CG8405	-0.0955363	0.200162	0.279648
Q7K4Q9	Q7K4Q9_DROME	Hmgs	HMG_coenzyme_A_synthase,_isoform_A	-0.0225953	0.906368	0.931396
Q7K4T8	Q7K4T8_DROME	CG8520	CG8520	1.66915	2.38435e-07	3.96655e-06
Q7K4V4	AKTP1_DROME	cbx	Protein_crossbronx	-0.0296295	0.798293	0.84827
Q7K4W1	CDKAL_DROME	CG6550	Threonylcarbamoyladenosine_tRNA_methylthiotransferase	0.561684	6.90947e-05	0.000336043
Q7K4Y0	Q7K4Y0_DROME	desat1	Desat1,_isoform_A	0.421156	0.115334	0.176336
Q7K511	Q7K511_DROME	EG:87B1.3	CG3835,_isoform_A	1.90711	3.40821e-07	5.15748e-06
Q7K519	Q7K519_DROME	RagC-D	GH16429p	-0.0212828	0.830338	0.874737
Q7K533	Q7K533_DROME	CG11395	CG11395	0.551002	0.0789599	0.128505
Q7K549	Q7K549_DROME	mlt	CG12214,_isoform_A	-0.333786	0.0255824	0.0496816
Q7K550	EIF3J_DROME	Adam	Eukaryotic_translation_initiation_factor_3_subunit_J	0.301469	0.00446563	0.0110792
Q7K561	Q7K561_DROME	CG8503	CG8503	-0.415585	0.14566	0.214603
Q7K566	Q7K566_DROME	Bmcp	Bmcp,_isoform_A	-0.0338704	0.686875	0.758431
Q7K569	Q7K569_DROME	Gpo-1	GH10595p	-0.554761	0.00116706	0.00354063
Q7K579	Q7K579_DROME	Dgkepsilon	Diacyl_glycerol_kinase_epsilon	-0.208325	0.0184411	0.0374185
Q7K581	Q7K581_DROME	CG8963	CG8963,_isoform_A	-0.0771747	0.382134	0.474974
Q7K5J8	Q7K5J8_DROME	Cpr57A	Cuticular_protein_57A,_isoform_A	-0.288321	0.150464	0.220452
Q7K5K3	Q7K5K3_DROME	CG11876	CG11876,_isoform_A	-0.878171	2.316e-05	0.000138026
Q7K5M0	Q7K5M0_DROME	scaf	GH05918p	0.343152	0.0843382	0.135459
Q7K5M2	Q7K5M2_DROME	CG10139	CG10139	0.528013	0.000940671	0.00296482
Q7K5M6	Q7K5M6_DROME	Sip1	GH04176p	0.359862	0.271754	0.359287
Q7K738	Q7K738_DROME	UbcD10	EG:52C10.4_protein	-0.435851	0.00108934	0.0033349
Q7K7A9	FEN1_DROME	Fen1	Flap_endonuclease_1	1.36722	8.62358e-09	3.13948e-07
Q7K7G0	Q7K7G0_DROME	deltaCOP	Delta-coatomer_protein,_isoform_B	-0.204842	0.0876743	0.139789
Q7K7W5	Q7K7W5_DROME	adp	Adipose	0.0462711	0.562375	0.649098
Q7K860	Q7K860_DROME	TpnC4	FI07231p	-1.01766	0.315639	0.40505
[truncated: 3,025 more rows]
