# Supplementary material for: E2F/Dp inactivation in fat body cells triggers systemic metabolic changes
Source: eLife. 2021 Jul 12;10:e67753. doi: 10.7554/eLife.67753 (PMC8298092; doi:10.7554/eLife.67753)
Supplement: Supplementary file 3. — List of upregulated and downregulated proteins in fat body and muscles were selected for enrichment analysis using cutoff FDR<5%, and FC>1.5 and FC<1.5, respectively. [file elife-67753-supp3.xls]

## Sheet: Legend
Enrichment analysis for KEEG pathways using the functionnal annotation analysis in DAVID
List of upregulated and downregulated proteins in fat body and muscles were selected for enrichment analysis using cutoff FDR<5%, and FC>1.5 and FC<1.5, respectively

## Sheet: Fat Body Up
Category	Term	Count	%	PValue	Genes	List Total	Pop Hits	Pop Total	Fold Enrichment	Bonferroni	Benjamini	FDR
KEGG_PATHWAY	dme01100:Metabolic pathways	91	16.8831	1.91779e-09	P10351, Q9VNR7, Q9VI04, Q9VW26, Q8IQF1, Q8MRN5, Q8SX78, A1ZB84, M9NDG8, Q9VTB3, A1ZBG9, Q9VVU1, Q9VXI1, Q9VAW3, M9PI17, O18408, Q9VMC6, Q9V9X4, Q9VW68, O96299, Q9VCR2, E1JIJ5, Q9VVE3, O76752, Q9VKD3, Q27580, Q0E8U4, Q9W374, A1ZB29, Q9VCE0, Q6NR46, Q9VE75, A4V448, Q9VLR2, Q9VMQ5, Q9W1V6, Q9VFQ9, Q7KW39, A4UZR3, Q8IMQ8, Q9VGS3, O97477, Q9VB69, M9PB52, Q9VUW3, Q9VUW2, Q9VV49, Q9VIX4, M9PCA6, Q9VTK9,…	165	901	2737	1.67536	1.87944e-07	1.87944e-07	2.12052e-06
KEGG_PATHWAY	dme00480:Glutathione metabolism	12	2.22635	0.000896126	A1ZB68, E1JJS1, P48591, Q9VG98, Q9VG97, Q9VFQ9, Q8MRN5, A1ZB71, P20432, Q9VG95, Q9VG93, A4V448	165	62	2737	3.21056	0.0841107	0.0429789	0.986404
KEGG_PATHWAY	dme00250:Alanine, aspartate and glutamate metabolism	8	1.48423	0.00123902	A1Z942, P20478, Q9VNR7, Q9VAW3, P54385, Q9VW68, Q7KV27, Q9VNX4	165	29	2737	4.57597	0.114408	0.0396906	1.36149
KEGG_PATHWAY	dme00983:Drug metabolism - other enzymes	10	1.85529	0.00151204	Q9VLR2, P10351, Q9VI04, A1ZBG9, Q9VGT0, Q9VJH8, Q0E8U4, Q9W374, Q8IMQ8, Q9VGT8	165	47	2737	3.52934	0.137821	0.0363943	1.65923
KEGG_PATHWAY	dme00982:Drug metabolism - cytochrome P450	11	2.04082	0.00284973	A1ZB68, E1JJS1, Q9VGT0, Q9VJH8, Q9VG98, Q9VG97, A1ZB71, P20432, Q9VG95, Q9VG93, Q9VGT8	165	61	2737	2.99126	0.243968	0.0543988	3.10621
KEGG_PATHWAY	dme00980:Metabolism of xenobiotics by cytochrome P450	11	2.04082	0.00284973	A1ZB68, E1JJS1, Q9VGT0, Q9VJH8, Q9VG98, Q9VG97, A1ZB71, P20432, Q9VG95, Q9VG93, Q9VGT8	165	61	2737	2.99126	0.243968	0.0543988	3.10621
KEGG_PATHWAY	dme00410:beta-Alanine metabolism	6	1.11317	0.00328845	Q9VI04, Q8SXQ1, Q7KW39, Q8MT58, Q9W374, Q9VW68	165	18	2737	5.52929	0.275881	0.0523783	3.57654
KEGG_PATHWAY	dme03450:Non-homologous end-joining	4	0.742115	0.0036944	Q9W252, Q9XYZ4, Q23976, Q9I7M8	165	6	2737	11.0586	0.30422	0.0504978	4.00989
KEGG_PATHWAY	dme03440:Homologous recombination	6	1.11317	0.00539665	Q9W252, Q9XYZ4, Q9VIH1, Q24492, Q9NG98, Q9VGI8	165	20	2737	4.97636	0.411574	0.0641386	5.80781
KEGG_PATHWAY	dme00220:Arginine biosynthesis	5	0.927644	0.00580002	A1Z942, P20478, Q9VCR2, P54385, Q7KV27	165	13	2737	6.37995	0.434507	0.0613754	6.22934
KEGG_PATHWAY	dme00280:Valine, leucine and isoleucine degradation	7	1.2987	0.00887858	Q9VYD5, Q9VVU1, Q8SXQ1, Q7KW39, Q9VW68, M9PGX7, Q9VGC2	165	31	2737	3.74565	0.582715	0.0836882	9.39038
KEGG_PATHWAY	dme03460:Fanconi anemia pathway	6	1.11317	0.0171094	Q9VIH1, Q24492, Q9NG98, Q9VGI8, Q8MYL1, A1Z7L1	165	26	2737	3.82797	0.815707	0.142512	17.3716
KEGG_PATHWAY	dme00260:Glycine, serine and threonine metabolism	6	1.11317	0.0200078	M9NDG8, Q9VNR7, O18680, Q8SXQ1, Q9VY04, Q9VTN9	165	27	2737	3.6862	0.86202	0.152152	20.0262
KEGG_PATHWAY	dme04145:Phagosome	10	1.85529	0.0329974	M9PFZ6, E1JIJ5, P06604, A4V0N4, Q24583, Q9V9S0, Q9VP18, Q9VE75, P10987, P23380	165	75	2737	2.21172	0.962683	0.22349	30.9964
KEGG_PATHWAY	dme00040:Pentose and glucuronate interconversions	7	1.2987	0.0406766	A1ZBG9, Q9VGT0, Q9VXI1, M9PI17, Q9VJH8, Q9VTK9, O96299, Q9VGT8	165	43	2737	2.70035	0.982917	0.252252	36.8192
KEGG_PATHWAY	dme01210:2-Oxocarboxylic acid metabolism	4	0.742115	0.0888847	Q9VYD5, Q9VCR2, Q8MT18, Q7KV27	165	18	2737	3.6862	0.999891	0.455649	64.2729

## Sheet: Fat Body Down
Category	Term	Count	%	PValue	Genes	List Total	Pop Hits	Pop Total	Fold Enrichment	Bonferroni	Benjamini	FDR
KEGG_PATHWAY	dme00030:Pentose phosphate pathway	9	2.02247	1.8164e-06	P52029, Q9VUY9, P41572, Q9W1G0, Q9VZ64, Q7KT33, P07764, P12646, Q95RV5	119	22	2737	9.40909	0.000145301	0.000145301	0.00193102
KEGG_PATHWAY	dme01130:Biosynthesis of antibiotics	20	4.49438	0.000176324	M9PJN8, Q9VUY9, P41572, Q9VLG9, Q9W1G0, M9PCE0, Q9VU28, Q7KT33, P07764, F0JAN1, P52029, Q7JR58, Q9W1H8, Q9VAN7, M9MS55, Q9VZ64, Q967S0, P20007, P12646, Q95RV5	119	180	2737	2.55556	0.0140081	0.00702878	0.187294
KEGG_PATHWAY	dme01200:Carbon metabolism	14	3.14607	0.000698125	M9PJN8, P41572, M9PCE0, Q9W1G0, Q7KT33, Q9VU28, P07764, P52029, Q7JR58, Q0E9E2, Q9VAN7, Q9VZ64, P12646, Q95RV5	119	110	2737	2.92727	0.0543374	0.0184508	0.739698
KEGG_PATHWAY	dme01212:Fatty acid metabolism	8	1.79775	0.00177917	Q9VJX8, E2QCY2, Q7JR58, A1Z784, Q9W1H8, Q9VKH6, Q9VNF5, Q7K4Y0	119	42	2737	4.38095	0.132778	0.0349883	1.87534
KEGG_PATHWAY	dme01100:Metabolic pathways	54	12.1348	0.00365999	A1Z992, P41572, Q8MLP3, Q7KT52, Q9VMS1, Q9VU28, F0JAN1, P52029, Q24407, E2QCY2, Q9VRP4, A1Z784, Q9W1H8, Q9VU95, M9PDU4, Q9VMC9, Q95RV5, M9PJN8, Q9VJ81, Q9W1G0, Q9VU38, Q9VGS9, Q9VZ64, P20007, Q9VP84, Q7KUD4, Q9VEQ0, M9PCE0, Q7KT33, P07764, Q6XPX3, P84345, E1JHQ1, Q9V778, Q8IPA2, Q9VW84, Q9VAN7, Q9VKH6, P12646, Q9VUY9, Q9VLG9, Q8I725, Q9VIK0, Q8MZC4, Q7JR58, Q0E9E2, Q9Y119, Q961N0, Q9W3I8, M9MS55,…	119	901	2737	1.37847	0.254229	0.0569796	3.82314
KEGG_PATHWAY	dme01230:Biosynthesis of amino acids	9	2.02247	0.00498146	M9PJN8, E1JHQ1, Q0E9E2, Q9VAN7, Q9VLG9, Q9W1G0, M9PCE0, P07764, Q95RV5	119	63	2737	3.28571	0.329353	0.064417	5.17063
KEGG_PATHWAY	dme00010:Glycolysis / Gluconeogenesis	8	1.79775	0.00686448	P52029, M9PJN8, Q9VUY9, Q9VAN7, M9PCE0, Q7KT33, P20007, P07764	119	53	2737	3.4717	0.423657	0.0757029	7.06121
KEGG_PATHWAY	dme00062:Fatty acid elongation	4	0.898876	0.0162764	Q9VJX8, Q7JR58, Q9W1H8, Q9VKH6	119	13	2737	7.07692	0.730941	0.151345	16.009
KEGG_PATHWAY	dme00591:Linoleic acid metabolism	3	0.674157	0.0246716	Q6XPX3, Q7KUD4, Q9W3I8	119	6	2737	11.5	0.864459	0.199128	23.3237
KEGG_PATHWAY	dme00250:Alanine, aspartate and glutamate metabolism	5	1.1236	0.0338706	E1JHQ1, Q7JZB1, Q9VLG9, Q7KTW9, Q967S0	119	29	2737	3.96552	0.936493	0.240929	30.6721
KEGG_PATHWAY	dme00564:Glycerophospholipid metabolism	7	1.57303	0.0394609	Q6XPX3, Q7KUD4, Q8MZC4, C0PDF4, Q9W3I8, Q9VU95, B5RIM9	119	59	2737	2.72881	0.960079	0.253832	34.8199
KEGG_PATHWAY	dme00500:Starch and sucrose metabolism	5	1.1236	0.0420223	P52029, Q9VUY9, A1Z992, Q9Y119, Q8IPA2	119	31	2737	3.70968	0.967757	0.248892	36.6443
KEGG_PATHWAY	dme00061:Fatty acid biosynthesis	3	0.674157	0.0544109	E2QCY2, A1Z784, Q9VNF5	119	9	2737	7.66667	0.988619	0.291277	44.8318
KEGG_PATHWAY	dme04931:Insulin resistance	6	1.34831	0.0575056	M9PCY7, P91634, Q9VB47, Q9VYN1, Q8SXR7, P20007	119	49	2737	2.81633	0.991244	0.287112	46.7213
KEGG_PATHWAY	dme00565:Ether lipid metabolism	4	0.898876	0.0738452	Q6XPX3, Q7KUD4, Q9V778, Q9W3I8	119	23	2737	4	0.997839	0.335779	55.7608
KEGG_PATHWAY	dme04146:Peroxisome	7	1.57303	0.0744007	Q9VB02, O46085, E2QCY2, Q9V778, Q9W0M0, Q7JZB1, Q9VIK0	119	69	2737	2.33333	0.99794	0.320616	56.042
KEGG_PATHWAY	dme00592:alpha-Linolenic acid metabolism	3	0.674157	0.0917496	Q6XPX3, Q7KUD4, Q9W3I8	119	12	2737	5.75	0.999547	0.3642	64.0518

## Sheet: Muscle Up
Category	Term	Count	%	PValue	Genes	List Total	Pop Hits	Pop Total	Fold Enrichment	Bonferroni	Benjamini	FDR
KEGG_PATHWAY	dme01100:Metabolic pathways	142	17.1705	3.95375e-12	P54358, Q9VNR7, Q9VJ32, P41572, Q9VW26, Q8MLP3, Q9VE94, F0JAN1, M9NDG8, Q7KN85, M9ND26, Q9W228, P17719, Q9VXI1, Q9W3Z3, Q8SZY4, Q7KUC2, Q59E09, Q9VHN7, Q9VEJ3, A1Z6Z3, Q9VCR2, O76895, O76752, B7Z001, Q9W374, A1ZB29, Q9W1G0, Q9VAM8, Q9V7Y2, B7Z0X1, Q7KW39, A1ZAZ2, Q7KUD4, M9PB52, Q9VMY9, Q9VV49, M9PCA6, Q5BIL9, Q9VLX0, Q6XPX3, Q9VGT0, Q9VW84, Q9VGT8, P12646, Q9XZ10, Q9VTZ6, Q9VCK6, Q7JXB5, P20028,…	271	901	2737	1.59173	3.91419e-10	3.91419e-10	4.38007e-09
KEGG_PATHWAY	dme00240:Pyrimidine metabolism	25	3.02297	2.05901e-07	P54358, P20028, Q9VMX3, Q9VCN1, Q0E8U4, A1ZAS3, Q9VE94, Q9W374, A1ZB29, Q9VD81, Q8IPB1, P26019, Q9W088, Q7JZF5, M9ND26, M9PHI7, P48591, P91875, P05990, Q9Y118, Q8SZY4, Q7KUW2, Q9VM72, M9PBD6, Q9V444	271	79	2737	3.19609	2.0384e-05	1.0192e-05	0.000228104
KEGG_PATHWAY	dme00260:Glycine, serine and threonine metabolism	14	1.69287	3.57784e-07	Q9VCK6, M9NDG8, Q7JXZ2, Q9VAN0, Q9VNR7, Q9VKI8, Q9VKR4, Q8SXQ1, Q9VY04, B7Z0X1, Q9W3Z3, Q9VH09, Q9VG42, A1ZAZ2	271	27	2737	5.23685	3.542e-05	1.18068e-05	0.000396364
KEGG_PATHWAY	dme01130:Biosynthesis of antibiotics	39	4.71584	2.21504e-06	O97477, P35421, P41572, Q9VW26, Q9VH09, Q9VLX0, Q9VRU1, F0JAN1, Q7JYV7, Q7KN85, Q9VC18, M9NDG8, Q9VAN0, Q9VAW3, Q8SXQ1, Q9W3Z3, Q59E09, Q9VLC5, Q9VHN7, P12646, Q9VEJ3, Q7KN61, P00967, Q9VCK6, Q7JXB5, Q7JXZ2, O76895, E1JJR9, Q9VCR2, Q9VLG9, Q7JYW9, Q9W1G0, Q9VB96, Q9VKI8, Q9VKR4, B7Z0X1, Q9VZ64, P20007, Q967S0	271	180	2737	2.18825	0.000219265	5.48207e-05	0.00245387
KEGG_PATHWAY	dme03008:Ribosome biogenesis in eukaryotes	40	4.83676	2.5497e-06	M9PEE1, P56175, Q9U1H9, Q9VMJ1, Q9VRY5, Q9VV61, M9PCI2, Q9VL75, Q9W1V3, A1Z7K2, Q9V7P1, Q7JYV7, Q9VE98, Q9VSC6, Q7JZ53, Q9W4J5, Q9W124, Q9W4Z9, Q5U0X8, Q9VM69, Q9VUR2, E1JGV6, Q95WY3, Q8IH00, Q9VPM0, A8DYB0, Q9VBY2, Q9VVC9, Q9VIG1, Q9V411, Q9V5P6, Q9VTL5, Q9VLK1, Q9W3C1, Q7JQT9, Q9VFV8, M9PFG1, Q7KVW2, Q9VM75, P56538	271	188	2737	2.14886	0.000252388	5.04828e-05	0.0028246
KEGG_PATHWAY	dme03410:Base excision repair	11	1.33011	5.60467e-06	B7YZZ9, P54358, Q9W088, Q9VG84, Q9VCN1, Q9Y118, Q7K7A9, P35875, Q9W1H4, Q9Y095, Q9V444	271	20	2737	5.5548	0.00055471	9.24731e-05	0.00620887
KEGG_PATHWAY	dme03440:Homologous recombination	10	1.20919	4.90402e-05	P54358, Q9W252, Q9XYZ4, Q9W088, Q9VIH1, Q24492, Q9NG98, Q9VYW3, Q9Y118, Q9VGI8	271	20	2737	5.04982	0.00484333	0.000693345	0.054315
KEGG_PATHWAY	dme00230:Purine metabolism	29	3.50665	4.96535e-05	P54358, P10351, Q9VMY9, P35421, Q9VE94, F0JAN1, Q7JYV7, Q9VC18, M9ND26, Q7JZF5, Q7JWW6, Q9VVK5, Q8SZY4, Q9V444, P16163, P00967, P20028, Q9VMX3, Q9VCN1, Q9VD81, P26019, Q9W088, P48591, P91875, Q9Y118, Q7KUW2, Q9VM72, Q967S0, M9PBD6	271	132	2737	2.21886	0.00490376	0.000614289	0.0549941
KEGG_PATHWAY	dme03030:DNA replication	12	1.45103	0.000338316	P54358, Q9W088, Q9VIH1, Q24492, Q9VYW3, Q9VCN1, Q9Y118, Q7K7A9, Q9W1H4, Q9V444, P26019, Q9XYU1	271	35	2737	3.46273	0.0329441	0.00371519	0.37416
KEGG_PATHWAY	dme00670:One carbon pool by folate	7	0.846433	0.000482906	P00967, Q9VC18, Q9VKR4, P17719, B7Z0X1, O96553, Q9VIC9	271	12	2737	5.89145	0.0466939	0.0047705	0.533679
KEGG_PATHWAY	dme00040:Pentose and glucuronate interconversions	13	1.57195	0.0006201	Q9VWP2, Q9VJ81, Q7JVH6, Q5U1B0, Q9VEQ0, Q9VTK9, O97479, Q9W228, Q9VGT0, Q9VXI1, Q9VG29, Q9VGT8, Q9Y112	271	43	2737	3.05338	0.0595614	0.00556708	0.684825
KEGG_PATHWAY	dme00410:beta-Alanine metabolism	8	0.967352	0.00102955	A1Z6Z3, Q8SXQ1, Q7KW39, Q9W374, Q9VW68, Q9VLC5, Q9VHA1, Q9VB96	271	18	2737	4.48872	0.0969508	0.00846218	1.13467
KEGG_PATHWAY	dme00052:Galactose metabolism	11	1.33011	0.00113177	Q9VGE7, M9PB52, Q7JVH6, M9ND19, M9PCA6, Q7K127, Q7JYW9, Q9VTK9, A1Z7F3, Q9VRU1, Q9Y112	271	34	2737	3.26753	0.106053	0.00858665	1.24668
KEGG_PATHWAY	dme03450:Non-homologous end-joining	5	0.604595	0.00118417	Q9W252, Q9XYZ4, Q23976, Q7K7A9, Q9I7M8	271	6	2737	8.41636	0.110684	0.00834376	1.30407
KEGG_PATHWAY	dme00250:Alanine, aspartate and glutamate metabolism	10	1.20919	0.00131258	A1Z942, P20478, Q9VNR7, Q9VAW3, Q9W3Z3, P05990, Q9VLG9, Q9VW68, Q7KTW9, Q967S0	271	29	2737	3.48263	0.121932	0.00863127	1.44454
KEGG_PATHWAY	dme03430:Mismatch repair	8	0.967352	0.0021086	P54358, Q9W088, Q9VIH1, Q24492, Q9VYW3, Q9Y118, M9ND86, Q9W1H4	271	20	2737	4.03985	0.188582	0.0129758	2.31132
KEGG_PATHWAY	dme00982:Drug metabolism - cytochrome P450	14	1.69287	0.00532933	A1ZB68, A1Z6Z3, Q9VJ81, A1ZB72, A1ZB71, Q9XYZ9, Q9VSL6, Q9W1E9, Q9W228, Q9VGT0, Q7K8X7, Q9VG29, Q9VG93, Q9VGT8	271	61	2737	2.31795	0.410814	0.0306393	5.74798
KEGG_PATHWAY	dme00053:Ascorbate and aldarate metabolism	9	1.08827	0.0068541	Q9VJ81, Q9VTU9, Q9W228, Q9VGT0, Q8SXQ1, Q9VG29, Q9VGT8, Q9VLC5, Q9VB96	271	30	2737	3.02989	0.493835	0.0371208	7.33631
KEGG_PATHWAY	dme01230:Biosynthesis of amino acids	14	1.69287	0.00709554	Q9VCK6, Q7JXZ2, Q9VCR2, Q9VNW6, O76895, Q9VLG9, Q9W1G0, Q9VAN0, P20478, Q9VKI8, B7Z0X1, Q9VHN7, Q9VEJ3, M9PBV1	271	63	2737	2.24436	0.505873	0.0364234	7.58557
KEGG_PATHWAY	dme03420:Nucleotide excision repair	10	1.20919	0.0115036	P54358, Q9W088, Q9VIH1, Q24492, Q9VYW3, Q9VCN1, Q9Y118, Q9VNP8, Q9W1H4, Q9V444	271	39	2737	2.58965	0.681922	0.0556637	12.0305
KEGG_PATHWAY	dme00561:Glycerolipid metabolism	11	1.33011	0.0121169	Q9W448, Q7JVH6, Q9VV49, Q8SXQ1, Q7K127, Q9VTK9, A8DY69, Q9VLC5, Q9Y112, Q9W095, Q9VB96	271	46	2737	2.41513	0.700876	0.055851	12.6332
KEGG_PATHWAY	dme00980:Metabolism of xenobiotics by cytochrome P450	13	1.57195	0.013967	A1Z6Z3, A1ZB68, Q9VJ81, Q9W228, Q9VGT0, Q7K8X7, A1ZB72, Q9VG29, Q9XYZ9, A1ZB71, Q9VG93, Q9VGT8, Q9VSL6	271	61	2737	2.15238	0.751542	0.0613331	14.4288
KEGG_PATHWAY	dme00983:Drug metabolism - other enzymes	11	1.33011	0.0140915	P10351, Q9VJ81, Q9W228, Q9VGT0, Q0E8U4, Q9VG29, Q961N0, A1ZAS3, Q9W374, C9QP21, Q9VGT8	271	47	2737	2.36374	0.754629	0.0592578	14.5485
KEGG_PATHWAY	dme00340:Histidine metabolism	4	0.483676	0.0151476	A1Z6Z3, Q8SXQ1, Q9VLC5, Q9VB96	271	6	2737	6.73309	0.77933	0.0610209	15.5571
KEGG_PATHWAY	dme04142:Lysosome	17	2.05562	0.0176522	Q95029, Q9VNK6, Q9VED8, Q0KIE6, Q8MLP3, M9PCA6, Q9VL27, Q5BIL9, M9PH35, Q9VQ62, A1ZAU4, Q9VKV2, Q7K485, Q9VGE7, Q8IPB7, Q7K127, Q9XZ10	271	93	2737	1.84617	0.828501	0.0680976	17.9059
KEGG_PATHWAY	dme03020:RNA polymerase	8	0.967352	0.0195915	Q7JZF5, P20028, Q9VMX3, P91875, Q9VE94, Q9VD81, Q9VM72, M9PBD6	271	29	2737	2.78611	0.858974	0.0725708	19.6835
KEGG_PATHWAY	dme00220:Arginine biosynthesis	5	0.604595	0.0323249	A1Z942, P20478, O76895, Q9VCR2, Q9VLG9	271	13	2737	3.88447	0.961343	0.113507	30.5124
KEGG_PATHWAY	dme00330:Arginine and proline metabolism	10	1.20919	0.032476	M9NDG8, O76895, Q9VNW6, Q9VA69, Q9VW26, Q8SXQ1, Q9VLC5, Q9VHA1, Q9VEJ3, Q9VB96	271	46	2737	2.19557	0.961936	0.110176	30.6325
KEGG_PATHWAY	dme03460:Fanconi anemia pathway	7	0.846433	0.0368815	Q9VIH1, Q24492, Q9NG98, Q9VYW3, Q9VGI8, Q8MYL1, A1Z7L1	271	26	2737	2.71913	0.975773	0.120399	34.0525
KEGG_PATHWAY	dme00480:Glutathione metabolism	12	1.45103	0.0370911	A1ZB68, P48591, Q7K8X7, P41572, Q9W247, A1ZB72, Q9XYZ9, A1ZB71, Q9VG93, Q9VSL6, P12646, Q9VHA1	271	62	2737	1.95477	0.97629	0.117263	34.2113
KEGG_PATHWAY	dme00051:Fructose and mannose metabolism	7	0.846433	0.0436411	Q7JVH6, Q9VW84, Q7JYW9, Q9VTK9, Q9Y112, Q9VTZ6, O97479	271	27	2737	2.61842	0.987937	0.132815	39.0025
KEGG_PATHWAY	dme03013:RNA transport	21	2.5393	0.0508026	Q9U1H9, Q9XZ06, Q9W351, Q9XZ56, Q9VDV3, Q9VCH5, A1YK02, Q9VWS2, Q9VCG4, A1Z945, Q9VFE7, Q9VPM0, Q9VSC6, Q9VCW3, Q7KVW2, M9PD65, Q9VAD4, A8JQW3, Q9VBU7, Q9VKJ3, Q9V463	271	139	2737	1.52584	0.994268	0.148966	43.876
KEGG_PATHWAY	dme00030:Pentose phosphate pathway	6	0.725514	0.0584533	O77425, P41572, Q9W1G0, Q9VZ64, Q9VHN7, P12646	271	22	2737	2.75444	0.997428	0.165309	48.6889
KEGG_PATHWAY	dme00010:Glycolysis / Gluconeogenesis	10	1.20919	0.0713763	A1Z6Z3, Q7JXB5, Q9VV72, Q8SXQ1, Q7JYW9, Q9VRU1, Q59E09, P20007, Q9VLC5, Q9VB96	271	53	2737	1.90559	0.999345	0.193959	55.9731
KEGG_PATHWAY	dme00310:Lysine degradation	7	0.846433	0.088499	Q8SXQ1, Q9VDM7, Q9VTH0, Q9VLX0, Q9VLC5, Q9VY24, Q9VB96	271	32	2737	2.20929	0.999896	0.230568	64.1758

## Sheet: Muscle Down
Category	Term	Count	%	PValue	Genes	List Total	Pop Hits	Pop Total	Fold Enrichment	Bonferroni	Benjamini	FDR
KEGG_PATHWAY	dme03010:Ribosome	108	9.16808	3.6e-26	P55830, E1JJM9, M9PE14, P14130, Q9W229, Q9VHN6, M9PB84, Q06559, A1ZAH8, Q9VU36, Q9VXB5, P55828, Q9W5R8, P48159, Q8SXF0, P50882, M9NDH8, Q8MLY8, P15357, A1Z8U9, P17704, Q9W237, P50887, Q9VXQ0, Q9W547, Q9VJ38, Q7KR04, P09180, Q9W3W8, Q9W1B9, Q9VMY1, M9MRC9, Q9V3G1, Q8T3U2, Q7JVK1, M9PEA6, A8Y560, A8E702, M9NEQ9, Q9VBN5, Q9W0A8, Q9VSR5, M9PFF0, Q9VA91, P55841, P05389, Q24186, Q9W199, P32100, Q9W4I3,…	483	233	2737	2.62661	3.85e-24	3.85e-24	4.04e-23
KEGG_PATHWAY	dme00190:Oxidative phosphorylation	71	6.02716	7.47e-20	Q6IDF5, Q24251, Q9VXZ0, Q9VKZ1, Q9VTU2, Q9VQD7, Q9VMS1, A1ZAW7, Q9VJZ4, Q9XY35, Q24407, Q9VXI6, Q7K1C0, Q7JYH3, Q9VQ29, O97418, M9PD18, P00399, L0MQ04, M9PDU4, Q9W125, Q9VRL0, Q9VIQ8, Q9VTB4, Q9VQR2, Q9VWI0, Q9VV75, Q9VKM3, Q9W141, A4V383, Q9VX36, Q9VZU4, Q9VMI3, P00417, O77134, A4V449, Q500Y7, P18934, Q9V4E0, P18935, Q94514, Q94516, Q9VMQ6, Q9W402, Q9V3L7, Q9V3W2, Q9VGS3, Q8SYJ2, P18930, Q7JZK1,…	483	139	2737	2.89448	7.99e-18	4e-18	8.4e-17
KEGG_PATHWAY	dme00020:Citrate cycle (TCA cycle)	22	1.86757	2.18e-06	P21914, Q8IRQ5, Q9V470, Q8T4D6, Q9VD58, M9MRQ9, Q9VM14, Q9VU28, Q9VEB1, A8JNU6, E4NKP2, Q9VGQ1, Q7K5K3, Q0E9E2, Q8MT18, Q9VVL7, Q9W401, Q9W4H6, Q9VHJ8, Q94523, Q9VIE8, Q9VGS3	483	43	2737	2.89922	0.000233	7.76e-05	0.00244681
KEGG_PATHWAY	dme01200:Carbon metabolism	40	3.39559	3.6e-06	Q9VB69, Q9V470, Q9VSA3, Q8T4D6, P15007, Q9VM14, M9PCE0, Q9VU28, P07764, O62619, P52029, A8JNU6, E4NKP2, Q8IPE8, Q9VAN7, Q9W4H6, Q9VHJ8, Q94523, P21914, M9PJN8, Q8IRQ5, P29613, Q9W330, Q9VD58, M9MRQ9, Q9VDT1, P07486, Q9VQ61, Q9VGC2, Q9VEB1, P52034, Q9VGQ1, Q7K5K3, Q0E9E2, Q9VVL7, Q8MT18, Q9W0H6, Q9W401, Q9VIE8, Q9VGS3	483	110	2737	2.06061	0.000385	9.64e-05	0.0040501
KEGG_PATHWAY	dme01100:Metabolic pathways	183	15.5348	0.00775177	Q9VYA0, Q6IDF5, Q9VXZ0, Q9VQD7, Q9VU28, Q9V420, Q24407, Q9VXI6, Q9W1H8, Q7JYH3, Q9VQ29, O97418, Q8IPE8, M9PD18, A5XCL5, A4UZW2, Q9VIQ8, Q9VTB4, Q9VWI0, M9PJN8, P29613, Q9VKM3, Q9VY27, Q9U915, Q7K579, Q7KNS3, Q9VX36, Q500Y7, Q9VEB1, Q9V4E0, Q9V6U9, Q9W401, Q9W402, Q9VTW1, Q9VJ39, O97422, P28668, Q9VP84, Q9VGS3, Q9W2J4, P18930, Q9VB69, Q7JZK1, Q9VSA3, Q8T4D6, Q9VM14, E1JHN2, P07764, Q9VVH5, P00408,…	483	901	2737	1.15094	0.565114	0.153406	8.37574
KEGG_PATHWAY	dme03018:RNA degradation	18	1.52801	0.00877667	Q9VKW8, P15007, Q9W1H5, Q9VCH8, Q9VNH5, P23128, P52034, A8DY80, Q9W087, Q8IMX8, P21187, O02649, Q6NNB2, Q9V9X7, Q7K112, Q7K126, Q29QQ9, Q94547	483	54	2737	1.88889	0.610639	0.145474	9.43393
KEGG_PATHWAY	dme01130:Biosynthesis of antibiotics	45	3.82003	0.0103377	Q9V470, Q9VSA3, Q8T4D6, P15007, Q9VM14, M9PCE0, Q9VU28, P07764, O62619, P52029, Q8IQG9, A8JNU6, E4NKP2, Q9W1H8, Q8IPE8, Q9VAN7, Q9W4H6, A5XCL5, Q9VHJ8, Q94523, Q9VYD5, M9PJN8, P21914, Q8IRQ5, P29613, Q9W330, Q9VY27, A4V4U5, Q9U915, Q9VUY9, Q9VD58, M9MRQ9, P07486, Q9VQ61, Q9VEB1, P52034, Q9VGQ1, Q7K5K3, Q9VVL7, Q8MT18, Q9W0H6, Q9W401, Q9VEV7, Q9VIE8, Q9VGS3	483	180	2737	1.41667	0.671064	0.146868	11.0243
KEGG_PATHWAY	dme01230:Biosynthesis of amino acids	19	1.6129	0.0202838	M9PJN8, Q9VYD5, P29613, Q8T4D6, P40320, P15007, Q9VD58, M9PCE0, P07486, Q9VQ61, P07764, O62619, P52034, E4NKP2, Q0E9E2, Q8MT18, Q9W401, Q9VAN7, A4UZW2, Q9VIE8	483	63	2737	1.70899	0.888383	0.239733	20.5742
KEGG_PATHWAY	dme00860:Porphyrin and chlorophyll metabolism	14	1.18846	0.0239409	Q9W2J4, Q9VTV9, Q9V9S8, Q9VD55, O18680, Q9W3B3, Q9VKZ1, Q9W1F5, Q9W385, Q9W0G4, Q9VJH8, Q9VGJ9, Q9VC52, P28668	483	42	2737	1.88889	0.925193	0.250309	23.8438
KEGG_PATHWAY	dme01210:2-Oxocarboxylic acid metabolism	8	0.679117	0.0269492	Q9VYD5, E4NKP2, Q8T4D6, Q8MT18, Q9W401, Q9VD58, Q9VQ61, Q9VIE8	483	18	2737	2.51852	0.946235	0.253466	26.441
KEGG_PATHWAY	dme00010:Glycolysis / Gluconeogenesis	16	1.35823	0.0353334	M9PJN8, P29613, Q9W330, Q9VUY9, P15007, Q9VM14, M9PCE0, P07486, P07764, O62619, P52029, P52034, Q7K5K3, Q9VVL7, Q9VAN7, Q9W4H6	483	53	2737	1.71069	0.978701	0.295253	33.2593
KEGG_PATHWAY	dme00280:Valine, leucine and isoleucine degradation	10	0.848896	0.0802928	Q9VYD5, Q9VM58, Q9VSA3, Q9W1H8, Q9VVL7, Q9W0H6, Q8IPE8, Q9VDT1, Q9VGC2, A1Z934	483	31	2737	1.82796	0.999871	0.525894	60.9699
KEGG_PATHWAY	dme00785:Lipoic acid metabolism	3	0.254669	0.0820129	Q7JQW6, Q9VN27, Q8SX78	483	3	2737	5.66667	0.999894	0.505557	61.7827
