# Supplementary material for: E2F/Dp inactivation in fat body cells triggers systemic metabolic changes
Source: eLife. 2021 Jul 12;10:e67753. doi: 10.7554/eLife.67753 (PMC8298092; doi:10.7554/eLife.67753)
Supplement: Supplementary file 4. — Upregulated and downregulated proteins that are in common between fat body and muscle were selected for DAVID functional annotation tool. Annotation terms were clustered based on similarity. [file elife-67753-supp4.xls]

## Sheet: Legend
Functionnal Annotation Clustering for common changes between fat body and muscle
Upregulated and downregulated proteins that are in common between fat body and muscle were selected for DAVID functional annotation tool
Annotation terms were clustered based on similarity

## Sheet: Shared_Up
Annotation Cluster 1	Enrichment Score: 5.6758295774163425
Category	Term	Count	%	PValue	Genes	List Total	Pop Hits	Pop Total	Fold Enrichment	Bonferroni	Benjamini	FDR
SMART	SM00587:CHK	9	4.83871	4.68227e-08	Q9VBS8, Q961Q8, Q9VBU0, Q8IQS5, Q9VGJ8, Q9VGJ7, Q9VBT1, Q9VBT2, Q9VBS6	57	51	5218	16.1548	2.62207e-06	2.62207e-06	4.62345e-05
INTERPRO	IPR004119:Protein of unknown function DUF227	9	4.83871	8.81492e-07	Q9VBS8, Q961Q8, Q9VBU0, Q8IQS5, Q9VGJ8, Q9VGJ7, Q9VBT1, Q9VBT2, Q9VBS6	168	51	10984	11.5378	0.000338436	0.000338436	0.0012222
INTERPRO	IPR015897:CHK kinase-like	9	4.83871	8.81492e-07	Q9VBS8, Q961Q8, Q9VBU0, Q8IQS5, Q9VGJ8, Q9VGJ7, Q9VBT1, Q9VBT2, Q9VBS6	168	51	10984	11.5378	0.000338436	0.000338436	0.0012222
INTERPRO	IPR011009:Protein kinase-like domain	14	7.52688	0.000544238	Q961Q8, Q9VBU0, Q9VJ68, Q9VKN7, Q9VBS8, Q8IQS5, Q9VGJ8, P52304, Q9VGJ7, Q9VBT1, Q9VBT2, A1Z6I7, Q9VBS6, Q5EAK6	168	294	10984	3.11338	0.188641	0.0409469	0.751959
Annotation Cluster 2	Enrichment Score: 4.327624489449952
Category	Term	Count	%	PValue	Genes	List Total	Pop Hits	Pop Total	Fold Enrichment	Bonferroni	Benjamini	FDR
UP_KEYWORDS	Iron	16	8.60215	3.2574e-08	P10351, M9PB52, Q9VKD3, Q9VVR9, Q27593, P33270, Q9VF15, Q9V674, Q8IND5, M9PCC5, Q9VE01, Q9V4I1, Q9V773, Q9VE00, Q9VF53, Q9V771	186	189	13921	6.33601	4.13689e-06	2.06845e-06	3.77763e-05
GOTERM_MF_DIRECT	GO:0005506~iron ion binding	15	8.06452	4.70099e-08	P10351, Q9VVR9, Q9VDM7, Q27593, P33270, Q9VF15, Q9V674, Q8IND5, M9PCC5, Q9VE01, Q9V4I1, Q9V773, Q9VE00, Q9VF53, Q9V771	142	148	9284	6.62638	9.87204e-06	9.87204e-06	5.93926e-05
UP_KEYWORDS	Monooxygenase	11	5.91398	1.09116e-06	M9PCC5, Q9VE01, Q9W1V6, Q9V4I1, Q9VVR9, Q27593, P33270, Q9V773, Q9VE00, Q9V771, Q9V674	186	103	13921	7.99306	0.000138567	3.46436e-05	0.00126541
GOTERM_MF_DIRECT	GO:0016491~oxidoreductase activity	15	8.06452	1.25682e-06	Q9VTY2, Q9VY05, Q9VDM7, Q8IQH2, Q9VTK9, Q9VLX0, P33270, Q9V674, M9PCC5, Q9W1V6, Q9V4I1, Q9VY04, A1Z6N5, Q9V773, Q9V771, Q9VGF2	142	193	9284	5.08137	0.000263898	0.000131958	0.00158786
INTERPRO	IPR017972:Cytochrome P450, conserved site	10	5.37634	3.21928e-06	M9PCC5, Q9VE01, Q9V4I1, Q9VVR9, Q27593, P33270, Q9V773, Q9VE00, Q9V771, Q9V674	168	80	10984	8.17262	0.00123544	0.000617912	0.0044635
UP_KEYWORDS	Heme	11	5.91398	3.25087e-06	M9PCC5, Q9VE01, Q9V4I1, Q9VVR9, Q27593, P33270, Q9V773, Q9VE00, Q9VF15, Q9V771, Q9V674	186	116	13921	7.09728	0.000412775	8.25687e-05	0.00376998
GOTERM_MF_DIRECT	GO:0004497~monooxygenase activity	10	5.37634	6.87364e-06	M9PCC5, Q9VE01, Q9V4I1, Q9VVR9, Q27593, P33270, Q9V773, Q9VE00, Q9V771, Q9V674	142	88	9284	7.42958	0.00144243	0.000481041	0.00868385
INTERPRO	IPR001128:Cytochrome P450	10	5.37634	7.14924e-06	M9PCC5, Q9VE01, Q9V4I1, Q9VVR9, Q27593, P33270, Q9V773, Q9VE00, Q9V771, Q9V674	168	88	10984	7.42965	0.00274155	0.000914687	0.00991209
GOTERM_MF_DIRECT	GO:0016705~oxidoreductase activity, acting on paired donors, with incorporation or reduction of molecular oxygen	10	5.37634	9.07274e-06	M9PCC5, Q9VE01, Q9V4I1, Q9VVR9, Q27593, P33270, Q9V773, Q9VE00, Q9V771, Q9V674	142	91	9284	7.18465	0.00190347	0.000476208	0.0114619
INTERPRO	IPR002401:Cytochrome P450, E-class, group I	9	4.83871	2.08327e-05	M9PCC5, Q9VE01, Q9VVR9, Q27593, P33270, Q9V773, Q9VE00, Q9V771, Q9V674	168	77	10984	7.64193	0.00796793	0.00199796	0.028881
UP_SEQ_FEATURE	metal ion-binding site:Iron (heme axial ligand)	10	5.37634	2.12547e-05	M9PCC5, Q9VE01, Q9V4I1, Q9VVR9, Q27593, P33270, Q9V773, Q9VE00, Q9V771, Q9V674	53	96	3113	6.11832	0.00337384	0.00337384	0.0256343
GOTERM_MF_DIRECT	GO:0020037~heme binding	11	5.91398	3.05768e-05	M9PCC5, Q9VE01, Q9V4I1, Q9VVR9, Q27593, P33270, Q9V773, Q9VE00, Q9VF15, Q9V771, Q9V674	142	132	9284	5.44836	0.00640066	0.00128342	0.0386241
UP_KEYWORDS	Metal-binding	30	16.129	6.30523e-05	B7YZZ9, P10351, M9PB52, Q9VKN7, Q9VHF2, Q27593, P35875, M9PCC6, M9PCC5, Q24492, Q9VE01, Q9V4I1, O18408, Q9V773, Q9VE00, Q9V771, Q9VCR2, E1JJR9, O77425, Q9VKD3, Q9VVR9, P33270, Q8INL3, Q9VF15, Q9V674, Q8IND5, Q9W252, P08144, Q9W1V6, Q9VF53	186	1008	13921	2.2275	0.00797591	0.00114333	0.0730977
GOTERM_CC_DIRECT	GO:0031090~organelle membrane	7	3.76344	0.000308523	M9PCC5, Q9V4I1, Q27593, P33270, Q9V773, Q9V771, Q9V674	118	79	10026	7.52864	0.0288887	0.0288887	0.338608
COG_ONTOLOGY	Secondary metabolites biosynthesis, transport, and catabolism	10	5.37634	0.000601078	M9PCC5, Q9VE01, Q9V4I1, Q9VVR9, Q27593, P33270, Q9V773, Q9VE00, Q9V771, Q9V674	36	91	1239	3.78205	0.00718913	0.00718913	0.386083
UP_KEYWORDS	Microsome	7	3.76344	0.000631998	M9PCC5, Q9V4I1, Q27593, P33270, Q9V773, Q9V771, Q9V674	186	79	13921	6.63175	0.0771505	0.00799676	0.730482
GOTERM_BP_DIRECT	GO:0046701~insecticide catabolic process	3	1.6129	0.0350942	Q27593, P33270, Q9V674	143	23	10996	10.0298	0.999999	0.489123	38.9699
UP_KEYWORDS	Endoplasmic reticulum	7	3.76344	0.0363416	M9PCC5, Q9V4I1, Q27593, P33270, Q9V773, Q9V771, Q9V674	186	184	13921	2.84733	0.990917	0.165415	34.9038
GOTERM_CC_DIRECT	GO:0005789~endoplasmic reticulum membrane	7	3.76344	0.0445601	M9PCC5, Q9V4I1, Q27593, P33270, Q9V773, Q9V771, Q9V674	118	221	10026	2.69123	0.986838	0.461319	39.4109
GOTERM_BP_DIRECT	GO:0046680~response to DDT	3	1.6129	0.0502958	Q27593, P33270, Q9V674	143	28	10996	8.23876	1	0.569851	50.9976
Annotation Cluster 3	Enrichment Score: 3.894916934083799
Category	Term	Count	%	PValue	Genes	List Total	Pop Hits	Pop Total	Fold Enrichment	Bonferroni	Benjamini	FDR
UP_KEYWORDS	DNA damage	9	4.83871	5.97097e-07	B7YZZ9, M9PCC6, Q9W252, Q9XYZ4, Q23976, Q9VG84, Q9I7M8, Q9VQM4, Q5EAK6	186	55	13921	12.2472	7.58285e-05	2.52768e-05	0.000692455
UP_KEYWORDS	DNA repair	8	4.30108	5.27571e-06	B7YZZ9, M9PCC6, Q9W252, Q9XYZ4, Q23976, Q9VG84, Q9I7M8, Q9VQM4	186	52	13921	11.5145	0.000669793	0.000111663	0.0061181
GOTERM_BP_DIRECT	GO:0000723~telomere maintenance	5	2.68817	0.000162738	Q9W252, Q9XYZ4, Q23976, Q9I7M8, Q5EAK6	143	22	10996	17.4762	0.0593597	0.0201915	0.224709
KEGG_PATHWAY	dme03450:Non-homologous end-joining	4	2.15054	0.0002431	Q9W252, Q9XYZ4, Q23976, Q9I7M8	66	6	2737	27.6465	0.0168751	0.00847343	0.251302
UP_KEYWORDS	DNA recombination	4	2.15054	0.000754544	M9PCC6, Q23976, Q9VG84, Q9I7M8	186	14	13921	21.384	0.0914117	0.00867697	0.871559
GOTERM_BP_DIRECT	GO:0032508~DNA duplex unwinding	4	2.15054	0.00125557	Q9W252, Q23976, Q9VGI8, Q9I7M8	143	17	10996	18.093	0.37649	0.0901523	1.7216
GOTERM_CC_DIRECT	GO:0000784~nuclear chromosome, telomeric region	3	1.6129	0.0046074	Q9W252, Q23976, Q9I7M8	118	9	10026	28.322	0.355135	0.196965	4.9495
Annotation Cluster 4	Enrichment Score: 2.7155424378067994
Category	Term	Count	%	PValue	Genes	List Total	Pop Hits	Pop Total	Fold Enrichment	Bonferroni	Benjamini	FDR
KEGG_PATHWAY	dme03440:Homologous recombination	6	3.22581	7.61519e-05	Q9W252, Q9XYZ4, Q9VIH1, Q24492, Q9NG98, Q9VGI8	66	20	2737	12.4409	0.00531665	0.00531665	0.0787827
KEGG_PATHWAY	dme03460:Fanconi anemia pathway	6	3.22581	0.000289338	Q9VIH1, Q24492, Q9NG98, Q9VGI8, Q8MYL1, A1Z7L1	66	26	2737	9.56993	0.0200528	0.00672946	0.299036
COG_ONTOLOGY	DNA replication, recombination, and repair	3	1.6129	0.323807	Q9VIH1, Q9NG98, Q9VGI8	36	41	1239	2.51829	0.990862	0.790934	91.9326
Annotation Cluster 5	Enrichment Score: 2.647130332936582
Category	Term	Count	%	PValue	Genes	List Total	Pop Hits	Pop Total	Fold Enrichment	Bonferroni	Benjamini	FDR
GOTERM_BP_DIRECT	GO:0000723~telomere maintenance	5	2.68817	0.000162738	Q9W252, Q9XYZ4, Q23976, Q9I7M8, Q5EAK6	143	22	10996	17.4762	0.0593597	0.0201915	0.224709
GOTERM_BP_DIRECT	GO:0051276~chromosome organization	5	2.68817	0.00833429	Q9W252, Q9XYZ4, P35875, Q9VRQ2, Q5EAK6	143	62	10996	6.20122	0.957012	0.248794	10.9242
GOTERM_BP_DIRECT	GO:0016233~telomere capping	3	1.6129	0.00843822	Q9W252, Q9XYZ4, Q5EAK6	143	11	10996	20.9714	0.958673	0.233192	11.0532
Annotation Cluster 6	Enrichment Score: 2.3914133967830824
Category	Term	Count	%	PValue	Genes	List Total	Pop Hits	Pop Total	Fold Enrichment	Bonferroni	Benjamini	FDR
UP_KEYWORDS	ATP-binding	18	9.67742	0.00124958	O77425, Q9VMX6, Q23976, Q9VKN7, Q8SX76, Q9I7M8, P45891, Q9VF26, P20478, Q9W252, Q00449, P48591, Q9VG84, P52304, M9PBB5, Q9VGI8, Q9VC03, Q5EAK6	186	558	13921	2.41433	0.146829	0.0121407	1.43958
UP_KEYWORDS	Nucleotide-binding	19	10.2151	0.0056843	O77425, Q9VMX6, Q23976, Q9VD64, Q9VKN7, Q8SX76, Q9I7M8, P45891, Q9VF26, P20478, Q9W252, Q00449, P48591, Q9VG84, P52304, M9PBB5, Q9VGI8, Q9VC03, Q5EAK6	186	701	13921	2.02858	0.515174	0.0442394	6.39714
GOTERM_MF_DIRECT	GO:0005524~ATP binding	21	11.2903	0.00942584	O77425, Q9VMX6, Q23976, Q9VKN7, Q8SX76, A1ZB29, Q9I7M8, P45891, Q9VF26, Q7K4T8, P20478, Q9W252, Q00449, P48591, Q9VG84, P52304, M9PBB5, Q9VGI8, Q9VC03, A1Z6I7, Q5EAK6	142	751	9284	1.82821	0.863142	0.180353	11.277
Annotation Cluster 7	Enrichment Score: 2.383872278202957
Category	Term	Count	%	PValue	Genes	List Total	Pop Hits	Pop Total	Fold Enrichment	Bonferroni	Benjamini	FDR
GOTERM_MF_DIRECT	GO:0016614~oxidoreductase activity, acting on CH-OH group of donors	5	2.68817	0.000301475	Q8IND5, P10351, Q9VY05, Q9VY04, Q9VF53	142	22	9284	14.8592	0.0613563	0.0104977	0.380218
SMART	SM01092:SM01092	3	1.6129	0.00110818	Q8IND5, P10351, Q9VF53	57	5	5218	54.9263	0.0602039	0.0305692	1.08889
SMART	SM01008:SM01008	3	1.6129	0.00110818	Q8IND5, P10351, Q9VF53	57	5	5218	54.9263	0.0602039	0.0305692	1.08889
GOTERM_BP_DIRECT	GO:0009115~xanthine catabolic process	3	1.6129	0.00161429	Q8IND5, P10351, Q9VF53	143	5	10996	46.1371	0.455268	0.0962872	2.20839
GOTERM_MF_DIRECT	GO:0050660~flavin adenine dinucleotide binding	6	3.22581	0.0021026	Q8IND5, P10351, Q9VVU1, Q9VY05, Q9VY04, Q9VF53	142	60	9284	6.53803	0.357257	0.0611921	2.62419
GOTERM_MF_DIRECT	GO:0004854~xanthine dehydrogenase activity	3	1.6129	0.00222263	Q8IND5, P10351, Q9VF53	142	5	9284	39.2282	0.37329	0.0567358	2.77206
INTERPRO	IPR016208:Aldehyde oxidase/xanthine dehydrogenase	3	1.6129	0.00222968	Q8IND5, P10351, Q9VF53	168	5	10984	39.2286	0.575632	0.101604	3.04754
INTERPRO	IPR000674:Aldehyde oxidase/xanthine dehydrogenase, a/b hammerhead	3	1.6129	0.00222968	Q8IND5, P10351, Q9VF53	168	5	10984	39.2286	0.575632	0.101604	3.04754
INTERPRO	IPR005107:CO dehydrogenase flavoprotein, C-terminal	3	1.6129	0.00222968	Q8IND5, P10351, Q9VF53	168	5	10984	39.2286	0.575632	0.101604	3.04754
INTERPRO	IPR002888:[2Fe-2S]-binding	3	1.6129	0.00222968	Q8IND5, P10351, Q9VF53	168	5	10984	39.2286	0.575632	0.101604	3.04754
INTERPRO	IPR002346:Molybdopterin dehydrogenase, FAD-binding	3	1.6129	0.00222968	Q8IND5, P10351, Q9VF53	168	5	10984	39.2286	0.575632	0.101604	3.04754
INTERPRO	IPR008274:Aldehyde oxidase/xanthine dehydrogenase, molybdopterin binding	3	1.6129	0.00222968	Q8IND5, P10351, Q9VF53	168	5	10984	39.2286	0.575632	0.101604	3.04754
UP_KEYWORDS	Molybdenum	3	1.6129	0.00353039	Q8IND5, P10351, Q9VF53	186	7	13921	32.076	0.361832	0.0294997	4.01849
INTERPRO	IPR016169:CO dehydrogenase flavoprotein-like, FAD-binding, subdomain 2	3	1.6129	0.00458939	Q8IND5, P10351, Q9VF53	168	7	10984	28.0204	0.82905	0.178205	6.17879
INTERPRO	IPR016166:FAD-binding, type 2	3	1.6129	0.00458939	Q8IND5, P10351, Q9VF53	168	7	10984	28.0204	0.82905	0.178205	6.17879
INTERPRO	IPR006058:2Fe-2S ferredoxin, iron-sulphur binding site	3	1.6129	0.00458939	Q8IND5, P10351, Q9VF53	168	7	10984	28.0204	0.82905	0.178205	6.17879
GOTERM_MF_DIRECT	GO:0009055~electron carrier activity	5	2.68817	0.00683664	Q8IND5, P10351, Q9VVU1, Q27593, Q9VF53	142	50	9284	6.53803	0.76322	0.147915	8.30213
UP_KEYWORDS	FAD	5	2.68817	0.00825177	Q8IND5, P10351, Q9VVU1, Q9VY04, Q9VF53	186	60	13921	6.23701	0.650874	0.0538796	9.16207
INTERPRO	IPR001041:2Fe-2S ferredoxin-type domain	3	1.6129	0.00954394	Q8IND5, P10351, Q9VF53	168	10	10984	19.6143	0.974839	0.246681	12.4503
PIR_SUPERFAMILY	PIRSF000127:xanthine dehydrogenase	3	1.6129	0.0101616	Q8IND5, P10351, Q9VF53	28	5	806	17.2714	0.217394	0.217394	7.86653
UP_KEYWORDS	Flavoprotein	5	2.68817	0.0133461	Q8IND5, P10351, Q9VVU1, Q9VY04, Q9VF53	186	69	13921	5.42348	0.818475	0.0817799	14.4284
UP_KEYWORDS	Iron-sulfur	4	2.15054	0.0159107	Q8IND5, P10351, Q9VKD3, Q9VF53	186	40	13921	7.48441	0.869568	0.0884298	16.9727
UP_KEYWORDS	2Fe-2S	3	1.6129	0.0186511	Q8IND5, P10351, Q9VF53	186	16	13921	14.0333	0.908467	0.0987378	19.6148
INTERPRO	IPR012675:Beta-grasp domain	3	1.6129	0.021189	Q8IND5, P10351, Q9VF53	168	15	10984	13.0762	0.999732	0.351337	25.6916
GOTERM_MF_DIRECT	GO:0051537~2 iron, 2 sulfur cluster binding	3	1.6129	0.0470585	Q8IND5, P10351, Q9VF53	142	23	9284	8.52786	0.99996	0.490754	45.6096
Annotation Cluster 8	Enrichment Score: 2.36142470622242
Category	Term	Count	%	PValue	Genes	List Total	Pop Hits	Pop Total	Fold Enrichment	Bonferroni	Benjamini	FDR
GOTERM_BP_DIRECT	GO:0006310~DNA recombination	5	2.68817	0.000371355	Q9VIH1, Q24492, Q23976, Q9VG84, Q9I7M8	143	27	10996	14.2398	0.130342	0.0343114	0.512083
GOTERM_BP_DIRECT	GO:0006260~DNA replication	5	2.68817	0.00416293	Q9VIH1, Q24492, P48591, Q9VG84, Q9VGI8	143	51	10996	7.53874	0.791649	0.159939	5.60309
INTERPRO	IPR012340:Nucleic acid-binding, OB-fold	4	2.15054	0.0532766	Q9VCX7, Q9VIH1, Q24492, Q9VG84	168	56	10984	4.67007	1	0.615422	53.191
Annotation Cluster 9	Enrichment Score: 2.300642679029385
Category	Term	Count	%	PValue	Genes	List Total	Pop Hits	Pop Total	Fold Enrichment	Bonferroni	Benjamini	FDR
KEGG_PATHWAY	dme03440:Homologous recombination	6	3.22581	7.61519e-05	Q9W252, Q9XYZ4, Q9VIH1, Q24492, Q9NG98, Q9VGI8	66	20	2737	12.4409	0.00531665	0.00531665	0.0787827
GOTERM_BP_DIRECT	GO:0006302~double-strand break repair	3	1.6129	0.0350942	Q9W252, Q9XYZ4, Q9VGI8	143	23	10996	10.0298	0.999999	0.489123	38.9699
GOTERM_BP_DIRECT	GO:0006974~cellular response to DNA damage stimulus	5	2.68817	0.0468982	B7YZZ9, Q9W252, Q9XYZ4, Q9VGI8, Q9Y095	143	105	10996	3.66167	1	0.559981	48.5181
Annotation Cluster 10	Enrichment Score: 2.0271196007566084
Category	Term	Count	%	PValue	Genes	List Total	Pop Hits	Pop Total	Fold Enrichment	Bonferroni	Benjamini	FDR
UP_KEYWORDS	Aminotransferase	4	2.15054	0.000933992	Q9VNR7, Q9VW26, Q9VAW3, Q9VW68	186	15	13921	19.9584	0.111901	0.00984062	1.07781
INTERPRO	IPR005814:Aminotransferase class-III	3	1.6129	0.00135131	Q9VNR7, Q9VW26, Q9VW68	168	4	10984	49.0357	0.405036	0.0714947	1.85742
UP_KEYWORDS	Pyridoxal phosphate	4	2.15054	0.00654431	Q9VNR7, Q9VKD3, Q9VW26, Q9VW68	186	29	13921	10.3233	0.56563	0.047867	7.33174
INTERPRO	IPR015422:Pyridoxal phosphate-dependent transferase, major region, subdomain 2	4	2.15054	0.00694177	Q9VNR7, Q9VKD3, Q9VW26, Q9VW68	168	26	10984	10.0586	0.931089	0.215866	9.20668
INTERPRO	IPR015421:Pyridoxal phosphate-dependent transferase, major region, subdomain 1	4	2.15054	0.0134822	Q9VNR7, Q9VKD3, Q9VW26, Q9VW68	168	33	10984	7.92496	0.994551	0.310862	17.1555
GOTERM_MF_DIRECT	GO:0030170~pyridoxal phosphate binding	4	2.15054	0.0145503	Q9VNR7, Q9VKD3, Q9VW26, Q9VW68	142	34	9284	7.6918	0.953949	0.226246	16.9045
INTERPRO	IPR015424:Pyridoxal phosphate-dependent transferase	4	2.15054	0.0146249	Q9VNR7, Q9VKD3, Q9VW26, Q9VW68	168	34	10984	7.69188	0.996509	0.297837	18.4761
GOTERM_CC_DIRECT	GO:0005739~mitochondrion	11	5.91398	0.0517527	A1Z942, Q9VW14, Q9VNR7, Q9NG98, Q9VVU1, Q9VG84, Q9VKD3, Q9VW26, Q7KW39, Q9VW68, A1ZB29	118	477	10026	1.95939	0.99358	0.429317	44.2402
GOTERM_MF_DIRECT	GO:0042802~identical protein binding	3	1.6129	0.0669625	Q9VNR7, Q9VW26, Q9VW68	142	28	9284	7.00503	1	0.575219	58.3415
Annotation Cluster 11	Enrichment Score: 1.9940991488372517
Category	Term	Count	%	PValue	Genes	List Total	Pop Hits	Pop Total	Fold Enrichment	Bonferroni	Benjamini	FDR
GOTERM_BP_DIRECT	GO:0032508~DNA duplex unwinding	4	2.15054	0.00125557	Q9W252, Q23976, Q9VGI8, Q9I7M8	143	17	10996	18.093	0.37649	0.0901523	1.7216
UP_KEYWORDS	Helicase	6	3.22581	0.00221908	Q9VMX6, Q23976, M9PBB5, Q9VGI8, Q9I7M8, Q9VF26	186	69	13921	6.50818	0.24583	0.0199509	2.54344
GOTERM_BP_DIRECT	GO:0006303~double-strand break repair via nonhomologous end joining	3	1.6129	0.00333289	Q23976, Q9VGI8, Q9I7M8	143	7	10996	32.955	0.714998	0.145217	4.5097
GOTERM_MF_DIRECT	GO:0004003~ATP-dependent DNA helicase activity	3	1.6129	0.0160093	Q23976, Q9VGI8, Q9I7M8	142	13	9284	15.0878	0.966263	0.229491	18.4455
UP_KEYWORDS	DNA-binding	7	3.76344	0.719943	Q24492, Q9NG98, Q23976, P35875, Q9VGI8, Q9I7M8, Q9VLR5	186	535	13921	0.979268	1	0.97022	100
Annotation Cluster 12	Enrichment Score: 1.3463397194742448
Category	Term	Count	%	PValue	Genes	List Total	Pop Hits	Pop Total	Fold Enrichment	Bonferroni	Benjamini	FDR
UP_KEYWORDS	Helicase	6	3.22581	0.00221908	Q9VMX6, Q23976, M9PBB5, Q9VGI8, Q9I7M8, Q9VF26	186	69	13921	6.50818	0.24583	0.0199509	2.54344
SMART	SM00487:DEXDc	4	2.15054	0.0429491	Q9VMX6, M9PBB5, Q9VGI8, Q9VF26	57	73	5218	5.0161	0.914422	0.559323	35.1746
SMART	SM00490:HELICc	4	2.15054	0.0444322	Q9VMX6, M9PBB5, Q9VGI8, Q9VF26	57	74	5218	4.94832	0.921541	0.47075	36.1598
INTERPRO	IPR014001:Helicase, superfamily 1/2, ATP-binding domain	4	2.15054	0.102683	Q9VMX6, M9PBB5, Q9VGI8, Q9VF26	168	74	10984	3.53411	1	0.785817	77.7369
INTERPRO	IPR001650:Helicase, C-terminal	4	2.15054	0.105828	Q9VMX6, M9PBB5, Q9VGI8, Q9VF26	168	75	10984	3.48698	1	0.772622	78.7947
INTERPRO	IPR011545:DNA/RNA helicase, DEAD/DEAH box type, N-terminal	3	1.6129	0.181567	M9PBB5, Q9VGI8, Q9VF26	168	51	10984	3.84594	1	0.916417	93.7842
Annotation Cluster 13	Enrichment Score: 1.3434550100632197
Category	Term	Count	%	PValue	Genes	List Total	Pop Hits	Pop Total	Fold Enrichment	Bonferroni	Benjamini	FDR
UP_KEYWORDS	Transit peptide	7	3.76344	0.0141703	Q9VW14, Q9VE01, Q9VKD3, Q9VW26, Q9VVR9, Q7KW39, Q9VE00	186	148	13921	3.53992	0.836754	0.0826895	15.2537
UP_SEQ_FEATURE	transit peptide:Mitochondrion	6	3.22581	0.0424721	Q9VE01, Q9VKD3, Q9VW26, Q9VVR9, Q7KW39, Q9VE00	53	116	3113	3.03806	0.998993	0.899764	40.7553
GOTERM_CC_DIRECT	GO:0031966~mitochondrial membrane	3	1.6129	0.0503984	Q9VE01, Q9VVR9, Q9VE00	118	31	10026	8.22253	0.992648	0.458867	43.3586
UP_KEYWORDS	Mitochondrion	7	3.76344	0.139406	Q9VW14, Q9VE01, Q9VKD3, Q9VW26, Q9VVR9, Q7KW39, Q9VE00	186	263	13921	1.99205	1	0.493868	82.4672
Annotation Cluster 14	Enrichment Score: 1.2723232439678016
Category	Term	Count	%	PValue	Genes	List Total	Pop Hits	Pop Total	Fold Enrichment	Bonferroni	Benjamini	FDR
GOTERM_MF_DIRECT	GO:0004602~glutathione peroxidase activity	4	2.15054	0.0103157	A1ZB68, A1ZB71, Q9VG93, Q9VQI7	142	30	9284	8.71737	0.886681	0.179596	12.2788
INTERPRO	IPR004045:Glutathione S-transferase, N-terminal	4	2.15054	0.0211408	A1ZB68, Q9VSL2, A1ZB71, Q9VG93	168	39	10984	6.70574	0.999727	0.366085	25.6409
GOTERM_BP_DIRECT	GO:0006749~glutathione metabolic process	4	2.15054	0.0226047	A1ZB68, Q9VSL2, A1ZB71, Q9VG93	143	47	10996	6.54426	0.999815	0.379733	27.0967
GOTERM_MF_DIRECT	GO:0004364~glutathione transferase activity	4	2.15054	0.0255746	A1ZB68, Q9VSL2, A1ZB71, Q9VG93	142	42	9284	6.22669	0.995663	0.322001	27.9143
INTERPRO	IPR010987:Glutathione S-transferase, C-terminal-like	4	2.15054	0.0402048	A1ZB68, Q9VSL2, A1ZB71, Q9VG93	168	50	10984	5.23048	1	0.545191	43.3887
KEGG_PATHWAY	dme00980:Metabolism of xenobiotics by cytochrome P450	5	2.68817	0.0550675	A1ZB68, Q9VGT0, A1ZB71, Q9VG93, Q9VGT8	66	61	2737	3.39916	0.981031	0.281371	44.3559
KEGG_PATHWAY	dme00982:Drug metabolism - cytochrome P450	5	2.68817	0.0550675	A1ZB68, Q9VGT0, A1ZB71, Q9VG93, Q9VGT8	66	61	2737	3.39916	0.981031	0.281371	44.3559
INTERPRO	IPR012336:Thioredoxin-like fold	5	2.68817	0.100409	A1ZB68, Q9VSL2, A1ZB71, Q9VG93, Q9VQI7	168	116	10984	2.81814	1	0.790453	76.9417
INTERPRO	IPR004046:Glutathione S-transferase, C-terminal	3	1.6129	0.103529	A1ZB68, A1ZB71, Q9VG93	168	36	10984	5.44841	1	0.776606	78.026
KEGG_PATHWAY	dme00480:Glutathione metabolism	4	2.15054	0.181059	A1ZB68, P48591, A1ZB71, Q9VG93	66	62	2737	2.67546	0.999999	0.560655	87.3456
COG_ONTOLOGY	Posttranslational modification, protein turnover, chaperones	6	3.22581	0.349218	A1ZB68, M9MRT2, Q9VKD3, Q9VSL2, A1ZB71, Q9VQI7	36	138	1239	1.49638	0.994229	0.724382	93.6947
Annotation Cluster 15	Enrichment Score: 1.128245250243588
Category	Term	Count	%	PValue	Genes	List Total	Pop Hits	Pop Total	Fold Enrichment	Bonferroni	Benjamini	FDR
GOTERM_BP_DIRECT	GO:0005975~carbohydrate metabolic process	7	3.76344	0.00247175	E1JJR9, P08144, Q9VAW3, Q0KIE6, O18408, Q9VAQ8, Q8MM24	143	106	10996	5.07798	0.605654	0.124476	3.36293
INTERPRO	IPR013781:Glycoside hydrolase, catalytic domain	5	2.68817	0.005529	P08144, Q0KIE6, O18408, M9PCA6, Q8MM24	168	47	10984	6.95542	0.881047	0.191765	7.39928
INTERPRO	IPR017853:Glycoside hydrolase, superfamily	5	2.68817	0.00903276	P08144, Q0KIE6, O18408, M9PCA6, Q8MM24	168	54	10984	6.05379	0.969326	0.252007	11.8218
UP_KEYWORDS	Glycosidase	4	2.15054	0.151096	P08144, Q0KIE6, O18408, M9PCA6	186	101	13921	2.96412	1	0.500155	85.0387
UP_SEQ_FEATURE	disulfide bond	4	2.15054	0.832779	P08144, P48591, O18408, Q8MM24	53	265	3113	0.886579	1	1	100
UP_SEQ_FEATURE	signal peptide	6	3.22581	0.860344	P06607, P08144, P02844, O18408, Q8MM24, E1JH67	53	427	3113	0.825328	1	1	100
UP_KEYWORDS	Disulfide bond	6	3.22581	0.947018	P08144, Q9W1V6, P48591, O18408, E1JIE1, Q8MM24	186	670	13921	0.670246	1	0.999335	100
Annotation Cluster 16	Enrichment Score: 0.9764940378778113
Category	Term	Count	%	PValue	Genes	List Total	Pop Hits	Pop Total	Fold Enrichment	Bonferroni	Benjamini	FDR
GOTERM_BP_DIRECT	GO:0055085~transmembrane transport	10	5.37634	0.0128521	Q9VSV1, Q961R9, Q9VS47, Q9VGF7, Q00449, Q9W3W9, Q9VPX2, Q9VD40, Q9V5Z7, Q8I930	143	290	10996	2.65156	0.992278	0.276929	16.3726
INTERPRO	IPR020846:Major facilitator superfamily domain	7	3.76344	0.0507671	Q9VSV1, Q961R9, Q9VS47, Q9W3W9, Q9VPX2, Q9VD40, B7Z155	168	175	10984	2.61524	1	0.614304	51.441
INTERPRO	IPR011701:Major facilitator superfamily	4	2.15054	0.128854	Q9VSV1, Q9VS47, Q9W3W9, Q9VPX2	168	82	10984	3.18931	1	0.828935	85.2311
GOTERM_MF_DIRECT	GO:0022857~transmembrane transporter activity	4	2.15054	0.142295	Q961R9, Q9W3W9, Q9VPX2, Q9VD40	142	86	9284	3.04094	1	0.784533	85.619
INTERPRO	IPR005828:General substrate transporter	3	1.6129	0.226016	Q961R9, Q9W3W9, Q9VD40	168	59	10984	3.32446	1	0.953785	97.1342
GOTERM_CC_DIRECT	GO:0005887~integral component of plasma membrane	7	3.76344	0.511743	Q961R9, Q00449, E1JIU5, Q7JWV7, Q9W3W9, Q9VD40, Q9V5Z7	118	490	10026	1.2138	1	0.977262	99.9622
Annotation Cluster 17	Enrichment Score: 0.6191515727264174
Category	Term	Count	%	PValue	Genes	List Total	Pop Hits	Pop Total	Fold Enrichment	Bonferroni	Benjamini	FDR
GOTERM_BP_DIRECT	GO:0007315~pole plasm assembly	3	1.6129	0.0198368	M9PBB5, B7Z010, Q9VF26	143	17	10996	13.5697	0.999465	0.375529	24.1906
GOTERM_BP_DIRECT	GO:0048477~oogenesis	4	2.15054	0.7778	P02844, M9PBB5, B7Z010, Q9VF26	143	315	10996	0.976446	1	1	100
UP_KEYWORDS	Developmental protein	6	3.22581	0.899925	M9PBB5, P82147, Q8MM24, B7Z010, Q9VF26, Q5EAK6	186	593	13921	0.757276	1	0.997735	100
Annotation Cluster 18	Enrichment Score: 0.496782391429821
Category	Term	Count	%	PValue	Genes	List Total	Pop Hits	Pop Total	Fold Enrichment	Bonferroni	Benjamini	FDR
GOTERM_CC_DIRECT	GO:0005576~extracellular region	11	5.91398	0.114179	Q7KT11, P06607, P08144, Q9W1V6, P02844, O18408, Q8MM24, E1JH67, Q9VFG5, A1ZAU4, Q7KN04	118	556	10026	1.68098	0.99999	0.617038	73.6231
UP_KEYWORDS	Secreted	6	3.22581	0.32915	P06607, Q9W1V6, P02844, O18408, Q8MM24, E1JH67	186	287	13921	1.56468	1	0.755447	99.0242
UP_SEQ_FEATURE	signal peptide	6	3.22581	0.860344	P06607, P08144, P02844, O18408, Q8MM24, E1JH67	53	427	3113	0.825328	1	1	100
Annotation Cluster 19	Enrichment Score: 0.42250666925917363
Category	Term	Count	%	PValue	Genes	List Total	Pop Hits	Pop Total	Fold Enrichment	Bonferroni	Benjamini	FDR
GOTERM_CC_DIRECT	GO:0000776~kinetochore	4	2.15054	0.0111802	P52304, Q9VKN7, A1Z6I7, Q9VRQ2	118	40	10026	8.49661	0.656341	0.234347	11.6254
GOTERM_MF_DIRECT	GO:0004674~protein serine/threonine kinase activity	4	2.15054	0.423766	P52304, Q9VKN7, A1Z6I7, Q5EAK6	142	156	9284	1.67642	1	0.993481	99.9055
UP_KEYWORDS	Serine/threonine-protein kinase	3	1.6129	0.484115	P52304, Q9VKN7, Q5EAK6	186	122	13921	1.84043	1	0.884134	99.9536
UP_KEYWORDS	Kinase	5	2.68817	0.495084	O77425, P52304, Q9VKN7, A1Z6I7, Q5EAK6	186	273	13921	1.37077	1	0.885786	99.9638
SMART	SM00220:S_TKc	3	1.6129	0.53995	P52304, Q9VKN7, A1Z6I7	57	167	5218	1.6445	1	0.999833	99.9532
INTERPRO	IPR008271:Serine/threonine-protein kinase, active site	3	1.6129	0.658114	P52304, Q9VKN7, A1Z6I7	168	147	10984	1.33431	1	0.999992	100
GOTERM_BP_DIRECT	GO:0006468~protein phosphorylation	4	2.15054	0.672077	P52304, Q9VKN7, A1Z6I7, Q5EAK6	143	266	10996	1.15632	1	0.999999	100
GOTERM_MF_DIRECT	GO:0004672~protein kinase activity	3	1.6129	0.679359	P52304, A1Z6I7, Q5EAK6	142	153	9284	1.28197	1	0.999735	99.9999
INTERPRO	IPR000719:Protein kinase, catalytic domain	3	1.6129	0.855189	P52304, Q9VKN7, A1Z6I7	168	222	10984	0.883526	1	1	100
Annotation Cluster 20	Enrichment Score: 0.37977468283252375
Category	Term	Count	%	PValue	Genes	List Total	Pop Hits	Pop Total	Fold Enrichment	Bonferroni	Benjamini	FDR
GOTERM_BP_DIRECT	GO:0055085~transmembrane transport	10	5.37634	0.0128521	Q9VSV1, Q961R9, Q9VS47, Q9VGF7, Q00449, Q9W3W9, Q9VPX2, Q9VD40, Q9V5Z7, Q8I930	143	290	10996	2.65156	0.992278	0.276929	16.3726
UP_KEYWORDS	Membrane	32	17.2043	0.990019	Q961R9, Q9VS47, Q9VV49, Q9W3W9, Q9VD40, Q9W288, M9PCA6, Q27593, B7Z010, B7Z155, Q9VSV1, Q9VGF7, M9PCC5, Q9VE01, Q9V4I1, Q9VGT0, Q9VPX2, Q9V773, Q9VE00, Q9VGT8, Q9V771, E1JIU5, Q9VVE3, Q9VVR9, Q9V5Z7, Q8MLQ5, Q8I930, P33270, Q9V674, Q00449, Q7JWV7, Q9VAQ8	186	3266	13921	0.733316	1	0.99998	100
GOTERM_CC_DIRECT	GO:0016021~integral component of membrane	23	12.3656	0.992459	Q961R9, Q9VS47, E1JIU5, Q9VVE3, Q9VV49, Q9W3W9, Q9VD40, Q9W288, Q9V5Z7, M9PCA6, Q8MLQ5, Q27593, Q8I930, Q9V674, B7Z155, Q9VSV1, Q9VGF7, Q00449, Q7JWV7, Q9VGT0, Q9VPX2, Q9VAQ8, Q9VGT8	118	2814	10026	0.694464	1	1	100
UP_KEYWORDS	Transmembrane helix	23	12.3656	0.999759	Q961R9, Q9VS47, E1JIU5, Q9VVE3, Q9VV49, Q9W3W9, Q9VD40, Q9W288, Q9V5Z7, M9PCA6, Q8MLQ5, Q27593, Q8I930, Q9V674, B7Z155, Q9VSV1, Q9VGF7, Q00449, Q7JWV7, Q9VGT0, Q9VPX2, Q9VAQ8, Q9VGT8	186	2985	13921	0.576688	1	1	100
UP_KEYWORDS	Transmembrane	23	12.3656	0.999769	Q961R9, Q9VS47, E1JIU5, Q9VVE3, Q9VV49, Q9W3W9, Q9VD40, Q9W288, Q9V5Z7, M9PCA6, Q8MLQ5, Q27593, Q8I930, Q9V674, B7Z155, Q9VSV1, Q9VGF7, Q00449, Q7JWV7, Q9VGT0, Q9VPX2, Q9VAQ8, Q9VGT8	186	2990	13921	0.575724	1	1	100

## Sheet: Shared_Down
Annotation Cluster 1	Enrichment Score: 2.898904302131129
Category	Term	Count	%	PValue	Genes	List Total	Pop Hits	Pop Total	Fold Enrichment	Bonferroni	Benjamini	FDR
UP_KEYWORDS	Glycolysis	5	5.81395	5.82093e-06	P52029, M9PJN8, Q9VAN7, M9PCE0, P07764	86	20	13921	40.468	0.00051793	0.00051793	0.00631862
GOTERM_CC_DIRECT	GO:0031430~M band	4	4.65116	2.02779e-05	Q9VAN7, M9PCE0, B5RIM9, P07764	65	9	10026	68.5538	0.0015602	0.0015602	0.0213924
GOTERM_BP_DIRECT	GO:0006096~glycolytic process	5	5.81395	2.79495e-05	P52029, M9PJN8, Q9VAN7, M9PCE0, P07764	74	27	10996	27.5175	0.00707414	0.00707414	0.0363937
KEGG_PATHWAY	dme00010:Glycolysis / Gluconeogenesis	6	6.97674	0.000221903	P52029, M9PJN8, Q9VUY9, Q9VAN7, M9PCE0, P07764	31	53	2737	9.99513	0.00861785	0.00861785	0.201617
KEGG_PATHWAY	dme01200:Carbon metabolism	7	8.13953	0.000991516	P52029, M9PJN8, Q0E9E2, Q9VAN7, M9PCE0, Q9VU28, P07764	31	110	2737	5.61848	0.0379495	0.0191583	0.89807
GOTERM_CC_DIRECT	GO:0030018~Z disc	4	4.65116	0.00140351	Q9VAN7, M9PCE0, B5RIM9, P07764	65	35	10026	17.6281	0.102504	0.0354068	1.4709
KEGG_PATHWAY	dme01130:Biosynthesis of antibiotics	8	9.30233	0.00263872	P52029, M9PJN8, Q9VUY9, Q9W1H8, Q9VAN7, M9PCE0, Q9VU28, P07764	31	180	2737	3.92401	0.0979148	0.0337655	2.37418
KEGG_PATHWAY	dme01230:Biosynthesis of amino acids	5	5.81395	0.00445984	M9PJN8, Q0E9E2, Q9VAN7, M9PCE0, P07764	31	63	2737	7.00717	0.159974	0.0342638	3.98332
KEGG_PATHWAY	dme00030:Pentose phosphate pathway	3	3.48837	0.0234204	P52029, Q9VUY9, P07764	31	22	2737	12.0396	0.603176	0.142765	19.3876
UP_KEYWORDS	Polymorphism	4	4.65116	0.0370339	P52029, M9PJN8, Q9VUY9, B5RIM9	86	120	13921	5.39574	0.965216	0.342838	33.6116
KEGG_PATHWAY	dme01100:Metabolic pathways	16	18.6047	0.0382322	M9PJN8, A1Z992, Q9VUY9, Q9VMS1, M9PCE0, Q9VU28, P07764, P52029, P84345, Q24407, Q0E9E2, Q9W1H8, Q8IPA2, Q9VAN7, M9PDU4, Q9VP84	31	901	2737	1.56786	0.781355	0.19522	29.8477
UP_SEQ_FEATURE	sequence variant	6	6.97674	0.0410904	P52029, M9PJN8, Q9VUY9, M9PCE0, B5RIM9, Q8SWR8	28	225	3113	2.96476	0.97611	0.606854	36.5851
Annotation Cluster 2	Enrichment Score: 1.9150502026923157
Category	Term	Count	%	PValue	Genes	List Total	Pop Hits	Pop Total	Fold Enrichment	Bonferroni	Benjamini	FDR
GOTERM_CC_DIRECT	GO:0005964~phosphorylase kinase complex	3	3.48837	0.000119849	B7Z134, M9PCI5, Q961E7	65	3	10026	154.246	0.00918649	0.00460384	0.126376
GOTERM_MF_DIRECT	GO:0004689~phosphorylase kinase activity	3	3.48837	0.000323517	B7Z134, M9PCI5, Q961E7	70	4	9284	99.4714	0.0390174	0.0390174	0.3724
GOTERM_MF_DIRECT	GO:0005516~calmodulin binding	3	3.48837	0.0262067	B7Z134, M9PCI5, Q961E7	70	34	9284	11.7025	0.961857	0.804698	26.3768
UP_KEYWORDS	Transferase	8	9.30233	0.493277	B7Z134, M9PCI5, P91634, A1Z992, Q9W1H8, Q961E7, M9PCE0, A1Z7X7	86	1081	13921	1.19794	1	0.951445	99.9376
GOTERM_BP_DIRECT	GO:0006468~protein phosphorylation	3	3.48837	0.530534	B7Z134, M9PCI5, Q961E7	74	266	10996	1.67588	1	1	99.9947
Annotation Cluster 3	Enrichment Score: 1.654477345939437
Category	Term	Count	%	PValue	Genes	List Total	Pop Hits	Pop Total	Fold Enrichment	Bonferroni	Benjamini	FDR
GOTERM_BP_DIRECT	GO:0005975~carbohydrate metabolic process	6	6.97674	0.000676095	M9PGH3, P91634, A1Z992, Q8IPA2, B5RIM9, Q9VU28	74	106	10996	8.41101	0.157841	0.0556534	0.876935
INTERPRO	IPR013781:Glycoside hydrolase, catalytic domain	3	3.48837	0.046892	M9PGH3, A1Z992, Q8IPA2	82	47	10984	8.55008	0.999991	0.999991	46.2226
INTERPRO	IPR017853:Glycoside hydrolase, superfamily	3	3.48837	0.060074	M9PGH3, A1Z992, Q8IPA2	82	54	10984	7.44173	1	0.999427	55.0761
UP_KEYWORDS	Glycosidase	3	3.48837	0.12656	M9PGH3, A1Z992, Q8IPA2	86	101	13921	4.80808	0.999994	0.576933	76.9821
Annotation Cluster 4	Enrichment Score: 1.231572133087447
Category	Term	Count	%	PValue	Genes	List Total	Pop Hits	Pop Total	Fold Enrichment	Bonferroni	Benjamini	FDR
GOTERM_BP_DIRECT	GO:0002181~cytoplasmic translation	5	5.81395	0.00433784	Q9VLT7, Q9W5N2, P05389, Q7PLL3, Q9V9W2	74	100	10996	7.42973	0.668526	0.198156	5.50434
GOTERM_CC_DIRECT	GO:0022625~cytosolic large ribosomal subunit	4	4.65116	0.00596226	Q9VLT7, Q9W5N2, P05389, Q9V9W2	65	58	10026	10.6377	0.369012	0.0559334	6.11444
UP_KEYWORDS	Ribosomal protein	5	5.81395	0.0194599	Q9VLT7, Q9W5N2, Q7JWG9, P05389, Q9V9W2	86	168	13921	4.81762	0.826053	0.295171	19.2107
GOTERM_CC_DIRECT	GO:0005840~ribosome	4	4.65116	0.0245556	Q9VLT7, Q9W5N2, P05389, Q9V9W2	65	98	10026	6.29576	0.852567	0.191609	23.0727
UP_KEYWORDS	Ribonucleoprotein	5	5.81395	0.0334746	Q9VLT7, Q9W5N2, Q7JWG9, P05389, Q9V9W2	86	199	13921	4.06714	0.951696	0.35137	30.8988
GOTERM_MF_DIRECT	GO:0003735~structural constituent of ribosome	5	5.81395	0.21236	Q9VLT7, Q9W5N2, Q7JWG9, P05389, Q9V9W2	70	319	9284	2.07882	1	0.999351	93.6233
GOTERM_CC_DIRECT	GO:0022626~cytosolic ribosome	3	3.48837	0.255535	Q9W5N2, P05389, Q9V9W2	65	153	10026	3.02443	1	0.873261	95.5549
KEGG_PATHWAY	dme03010:Ribosome	4	4.65116	0.476856	Q9VLT7, Q9W5N2, P05389, Q9V9W2	31	233	2737	1.51571	1	0.920086	99.7238
GOTERM_BP_DIRECT	GO:0006412~translation	4	4.65116	0.769572	Q9VLT7, Q9W5N2, Q7JWG9, Q9V9W2	74	601	10996	0.988982	1	1	100
Annotation Cluster 5	Enrichment Score: 1.00831533523677
Category	Term	Count	%	PValue	Genes	List Total	Pop Hits	Pop Total	Fold Enrichment	Bonferroni	Benjamini	FDR
UP_KEYWORDS	NAD	4	4.65116	0.00558324	M9PJN8, Q8IRR5, B5RIM9, Q9VU28	86	59	13921	10.9744	0.392438	0.117128	5.89674
INTERPRO	IPR016040:NAD(P)-binding domain	3	3.48837	0.336198	M9PJN8, B5RIM9, Q9VU28	82	162	10984	2.48058	1	1	99.4971
UP_KEYWORDS	Oxidoreductase	5	5.81395	0.503005	M9PJN8, Q9W1H8, Q9VMS1, B5RIM9, Q9VU28	86	601	13921	1.34669	1	0.940898	99.9494
Annotation Cluster 6	Enrichment Score: 0.9650007076300184
Category	Term	Count	%	PValue	Genes	List Total	Pop Hits	Pop Total	Fold Enrichment	Bonferroni	Benjamini	FDR
UP_KEYWORDS	Transit peptide	4	4.65116	0.0619329	Q24407, Q7JWG9, Q8IRR5, M9PDU4	86	148	13921	4.37492	0.996621	0.433915	50.0437
UP_KEYWORDS	Mitochondrion	5	5.81395	0.0771773	P84345, Q24407, Q7JWG9, Q8IRR5, M9PDU4	86	263	13921	3.07742	0.999214	0.477874	58.1834
UP_SEQ_FEATURE	transit peptide:Mitochondrion	3	3.48837	0.266432	Q24407, Q7JWG9, M9PDU4	28	116	3113	2.87531	1	0.989907	96.5381
Annotation Cluster 7	Enrichment Score: 0.6300232325467281
Category	Term	Count	%	PValue	Genes	List Total	Pop Hits	Pop Total	Fold Enrichment	Bonferroni	Benjamini	FDR
UP_KEYWORDS	Mitochondrion	5	5.81395	0.0771773	P84345, Q24407, Q7JWG9, Q8IRR5, M9PDU4	86	263	13921	3.07742	0.999214	0.477874	58.1834
KEGG_PATHWAY	dme00190:Oxidative phosphorylation	4	4.65116	0.193086	P84345, Q24407, Q9VMS1, M9PDU4	31	139	2737	2.54073	0.999768	0.605315	85.7869
UP_KEYWORDS	Transport	3	3.48837	0.864349	P84345, Q24407, M9PDU4	86	564	13921	0.861022	1	0.997825	100
Annotation Cluster 8	Enrichment Score: 0.5961724670111644
Category	Term	Count	%	PValue	Genes	List Total	Pop Hits	Pop Total	Fold Enrichment	Bonferroni	Benjamini	FDR
INTERPRO	IPR011991:Winged helix-turn-helix DNA-binding domain	4	4.65116	0.0710772	Q24318, M9PC64, P02255, O77051	82	130	10984	4.12158	1	0.997323	61.4144
GOTERM_MF_DIRECT	GO:0003677~DNA binding	7	8.13953	0.229639	A1Z9R6, A1Z8A4, Q24318, Q0E9E2, P02255, O77051, Q9VIT0	70	555	9284	1.67279	1	0.998368	95.0624
UP_KEYWORDS	DNA-binding	5	5.81395	0.413583	Q24318, M9PC64, P02255, O77051, Q9VIT0	86	535	13921	1.51282	1	0.948637	99.6953
GOTERM_MF_DIRECT	GO:0003700~transcription factor activity, sequence-specific DNA binding	3	3.48837	0.6109	Q24318, M9PC64, O77051	70	275	9284	1.44686	1	0.999937	99.9981
Annotation Cluster 9	Enrichment Score: 0.4101421080215953
Category	Term	Count	%	PValue	Genes	List Total	Pop Hits	Pop Total	Fold Enrichment	Bonferroni	Benjamini	FDR
UP_KEYWORDS	Repressor	3	3.48837	0.122501	A1Z9R6, Q24318, O77051	86	99	13921	4.90521	0.999991	0.591249	75.7938
GOTERM_MF_DIRECT	GO:0003677~DNA binding	7	8.13953	0.229639	A1Z9R6, A1Z8A4, Q24318, Q0E9E2, P02255, O77051, Q9VIT0	70	555	9284	1.67279	1	0.998368	95.0624
UP_KEYWORDS	Transcription regulation	4	4.65116	0.468904	A1Z9R6, Q24318, Q9XZT7, O77051	86	416	13921	1.55646	1	0.948399	99.8961
UP_KEYWORDS	Transcription	4	4.65116	0.509354	A1Z9R6, Q24318, Q9XZT7, O77051	86	442	13921	1.46491	1	0.928671	99.956
GOTERM_CC_DIRECT	GO:0005634~nucleus	13	15.1163	0.511475	Q9XZT7, Q960D3, P02255, Q9VIT0, A1Z9R6, A1Z8A4, Q24318, Q9V4C8, O77264, Q7K126, Q9VVY4, O77051, Q9V426	65	1832	10026	1.09454	1	0.97471	99.9478
UP_KEYWORDS	Nucleus	8	9.30233	0.54526	A1Z9R6, Q24318, Q9V4C8, O77264, Q9XZT7, P02255, O77051, Q9VIT0	86	1134	13921	1.14195	1	0.939516	99.9807
GOTERM_BP_DIRECT	GO:0006351~transcription, DNA-templated	3	3.48837	0.718272	A1Z9R6, Q24318, O77051	74	376	10996	1.1856	1	1	100
Annotation Cluster 10	Enrichment Score: 0.2990516166585159
Category	Term	Count	%	PValue	Genes	List Total	Pop Hits	Pop Total	Fold Enrichment	Bonferroni	Benjamini	FDR
UP_KEYWORDS	Nucleotide-binding	6	6.97674	0.427255	O77264, Q0E9E2, E6PBV6, O76464, Q961E7, M9PCE0	86	701	13921	1.3855	1	0.945942	99.7642
UP_KEYWORDS	ATP-binding	5	5.81395	0.445251	O77264, Q0E9E2, E6PBV6, Q961E7, M9PCE0	86	558	13921	1.45047	1	0.945712	99.8332
GOTERM_MF_DIRECT	GO:0005524~ATP binding	6	6.97674	0.666122	O77264, Q0E9E2, E6PBV6, Q961E7, Q9W4R9, M9PCE0	70	751	9284	1.05962	1	0.999969	99.9997
Annotation Cluster 11	Enrichment Score: 2.790408940384835E-5
Category	Term	Count	%	PValue	Genes	List Total	Pop Hits	Pop Total	Fold Enrichment	Bonferroni	Benjamini	FDR
UP_KEYWORDS	Membrane	9	10.4651	0.999775	B7Z0V2, Q9VJX8, Q9V3S7, P84345, Q24407, B7Z134, M9PCI5, Q7KVF1, A1ZAB1	86	3266	13921	0.446065	1	1	100
UP_KEYWORDS	Transmembrane helix	6	6.97674	0.999984	B7Z0V2, Q9VJX8, Q9V3S7, P84345, Q7KVF1, A1ZAB1	86	2985	13921	0.325371	1	1	100
UP_KEYWORDS	Transmembrane	6	6.97674	0.999985	B7Z0V2, Q9VJX8, Q9V3S7, P84345, Q7KVF1, A1ZAB1	86	2990	13921	0.324827	1	1	100
GOTERM_CC_DIRECT	GO:0016021~integral component of membrane	4	4.65116	1	B7Z0V2, Q9V3S7, P84345, A1ZAB1	65	2814	10026	0.219255	1	1	100
