# Supplementary material for: E2F/Dp inactivation in fat body cells triggers systemic metabolic changes
Source: eLife. 2021 Jul 12;10:e67753. doi: 10.7554/eLife.67753 (PMC8298092; doi:10.7554/eLife.67753)
Supplement: Supplementary file 5. — Third instar larval Dp-/- mutant and controls, Canton-S and w1118, were profiled by liquid chromatography tandem mass spectrometry (LC-MS/MS). Original and preprocessing data. N/A means no detectable peak was found for that metabolite in that sample. [file elife-67753-supp5.xls]

## Sheet: Legend
Raw values for metabolomics dataset
Third instar larval Dp mutant and controls, Canton-S and w[1118], were profiled by LC MSMS
Original and preprocessing data. N/A means no detectable peak was found for that metabolite in that sample.

## Sheet: Raw values - Metabolomics
Sample ID	Canton S	Canton S	Canton S	Canton S	Canton S	Canton S	DP mutant	DP mutant	DP mutant	DP mutant	DP mutant	DP mutant	w[1118]	w[1118]	w[1118]	w[1118]	w[1118]	w[1118]
1-Methyl-Histidine	7.61522e+06	9.91486e+06	9.02819e+06	4.7872e+06	5.04973e+06	7.45763e+06	7.36565e+06	2.59789e+06	5.44484e+06	8.1968e+06	1.30666e+07	6.37869e+06	1.24531e+07	1.03209e+07	1.57454e+07	1.00553e+07	1.1297e+07	1.09095e+07
1-Methyladenosine	245979	401679	330200	140798	146836	283949	279106	30535.2	60189.3	285270	296640	96199.1	14925.7	15566.3	33841.1	21190.3	37385.7	15789.9
1,3-diphopshateglycerate	144921	314184	232134	115311	79818.8	191073	421767	143619	85575	261667	247572	259796	339852	204697	317459	296174	258736	368400
2-Aminooctanoic acid	49590.6	51084.8	31722.5	47020.8	41153.4	35890.5	25233.2	42950	49002.5	55002.9	N/A	52412.5	45669.6	37077.1	49713.3	42115.7	58208.2	104441
2-dehydro-D-gluconate	44180	60956.8	67789.6	42940.3	26060.3	56335.5	73110.4	18162.4	48391.6	74400.7	58634	56194.9	66446.5	76694	85967.6	110264	81053.4	114971
2-deoxyglucose-6-phosphate	509296	1.06974e+06	879126	275352	218801	652850	3.0006e+06	412874	1.34803e+06	2.67774e+06	2.79113e+06	1.94392e+06	1.94754e+06	823562	1.82103e+06	2.07961e+06	2.34534e+06	2.22046e+06
2-Hydroxy-2-methylbutanedioic acid	4.48527e+06	6.25745e+06	6.66086e+06	6.054e+06	6.59594e+06	1.13192e+07	4.07953e+07	1.24903e+07	2.83177e+07	5.19731e+07	4.63688e+07	2.99872e+07	2.44226e+06	4.83147e+06	1.21404e+07	9.82535e+06	8.9966e+06	1.23948e+07
2-hydroxygluterate	1.63761e+06	3.26614e+06	3.74769e+06	2.32577e+06	2.74033e+06	5.63392e+06	2.42867e+07	5.38006e+06	1.44998e+07	3.31253e+07	2.8837e+07	1.94071e+07	2.25895e+06	2.22802e+06	7.3234e+06	4.70468e+06	5.0907e+06	7.23963e+06
2-Isopropylmalic acid	7.30335e+06	1.28507e+07	1.1282e+07	4.36574e+06	4.06283e+06	6.23136e+06	1.66518e+07	2.98713e+06	6.36508e+06	1.9853e+07	2.6205e+07	6.61149e+06	1.646e+07	9.17924e+06	1.89349e+07	1.467e+07	1.90162e+07	1.41815e+07
2-keto-isovalerate	1.50691e+07	1.99625e+07	1.72659e+07	1.36706e+07	1.29004e+07	1.93474e+07	2.97577e+07	1.58459e+07	2.30699e+07	3.18892e+07	2.83749e+07	2.53428e+07	1.57953e+07	1.50602e+07	1.70602e+07	2.0685e+07	2.14858e+07	2.48186e+07
2-ketohaxanoic acid	571531	801651	1.00985e+06	883912	1.00313e+06	2.07587e+06	8.21972e+06	2.15524e+06	5.09123e+06	1.07543e+07	9.94266e+06	6.00467e+06	487747	598790	1.78159e+06	1.34502e+06	1.20293e+06	1.72786e+06
2-oxo-4-methylthiobutanoate	80892.7	116085	98991.3	49828.1	46019.8	39893	199702	23805.6	89090.3	180095	156494	97951.5	174154	99088.7	174165	107140	179482	167979
2-oxobutanoate	1.00131e+06	714402	1.1444e+06	955349	968821	1.24578e+06	2.87211e+06	1.24132e+06	2.20876e+06	3.91732e+06	3.55915e+06	2.58367e+06	985353	681976	1.126e+06	946889	1.04816e+06	1.13241e+06
2,3-dihydroxybenzoic acid	N/A	41257.6	234779	35925.1	145635	267457	44910.4	44891.9	69862.1	73330.1	33293.3	59585.8	98436	57680.3	57317.1	N/A	73210.2	106821
2,3-Diphosphoglyceric acid	115313	196336	174298	93265	113374	99193.6	142789	24056	79232.8	112002	109310	82937.2	150794	96367.2	164401	136638	185608	195217
3-hydroxy-3-methylglutaryl-CoA-nega	N/A	N/A	N/A	N/A	N/A	N/A	N/A	N/A	N/A	N/A	N/A	N/A	7764.25	N/A	N/A	N/A	N/A	N/A
3-hydroxybutyryl-CoA	N/A	N/A	N/A	N/A	N/A	N/A	N/A	N/A	N/A	N/A	5696.97	N/A	N/A	N/A	N/A	N/A	N/A	N/A
3-methylphenylacetic acid	28978.4	21185.4	24492.4	26704.8	22107.1	27664.6	71267.2	24788.1	33397.3	63424.7	105203	57544.2	22442.9	24268	39237.2	33897.1	23786.8	39931.3
3-phospho-serine	981003	1.26527e+06	1.10567e+06	765404	632883	785898	708827	350393	458333	591905	471920	804415	1.53508e+06	1.31155e+06	1.69528e+06	1.69195e+06	1.13339e+06	1.35733e+06
3-phosphoglycerate	8.1926e+06	1.19067e+07	9.68468e+06	5.14462e+06	4.95892e+06	6.82972e+06	1.0427e+07	2.49248e+06	6.36981e+06	8.3788e+06	5.91204e+06	9.08164e+06	1.37845e+07	8.2648e+06	1.18427e+07	1.79533e+07	1.55941e+07	1.88824e+07
3-S-methylthiopropionate	18104.6	11920.8	11407.3	N/A	N/A	N/A	N/A	N/A	N/A	7175.5	9777.03	7251.4	6190.69	N/A	7741.44	14477.3	10353.4	N/A
4-aminobutyrate	590460	840021	624394	425552	531935	731734	1.59079e+06	469136	858010	1.26228e+06	1.15414e+06	840194	1.25336e+06	960762	1.31582e+06	1.692e+06	1.65931e+06	1.99733e+06
4-Pyridoxic acid	6.30567e+06	9.68027e+06	1.07413e+07	4.91743e+06	4.98507e+06	4.68527e+06	7.16434e+06	1.67679e+06	3.07846e+06	7.40055e+06	8.83582e+06	5.17787e+06	7.83959e+06	6.80327e+06	1.24486e+07	5.97384e+06	8.02467e+06	6.56423e+06
5-methoxytryptophan	11910.2	14968.7	N/A	10510.7	8963.14	N/A	20733	N/A	N/A	11372.1	N/A	N/A	17993.1	13230.4	11642.3	N/A	14681.9	20666.1
5-methyl-THF	45027.9	70641.7	62012.9	36225	27391.8	46044.5	100535	29468.7	63302.1	135731	109439	89058.3	104610	54885.2	154464	91763.2	108548	123211
5-phosphoribosyl-1-pyrophosphate	47101.1	42886.2	25881.3	20099.7	18609.1	21679.5	89993	18847.8	34166.2	68851.3	53685.2	54329.3	25334.5	9675.66	25873.5	13778.5	37094.8	47591.4
6-phospho-D-gluconate	67964.6	84873.6	101985	32615.7	41411.4	66048	262891	61596.4	140220	168259	109213	131928	209495	101463	130979	238677	222036	198655
7-methylguanosine	118594	242737	173999	101007	72749.5	148795	208969	49191.9	113662	223873	203381	89586.2	205749	138096	218292	173170	200724	184058
7,8-dihydrofolate	N/A	N/A	N/A	N/A	N/A	N/A	N/A	N/A	N/A	N/A	N/A	N/A	N/A	N/A	N/A	6870.16	N/A	N/A
a-ketoglutarate	6.4233e+06	9.94373e+06	9.10525e+06	4.91515e+06	4.89771e+06	6.56597e+06	1.2374e+07	4.9493e+06	8.51988e+06	2.04683e+07	1.65095e+07	1.25479e+07	1.67872e+07	1.06552e+07	1.5553e+07	1.44982e+07	1.60712e+07	1.6503e+07
acadesine	34064.4	37253.6	22224.5	12942.7	20243.4	20735	41049.3	10849.1	30258.4	31981	27626.3	25348	28116.4	21381.9	27646	34418.2	47012.3	40209.4
acetoacetate	1.01016e+06	650796	1.23631e+06	946156	999434	1.25144e+06	2.91515e+06	1.15141e+06	2.28695e+06	4.04027e+06	3.57225e+06	2.65052e+06	855723	651025	1.04502e+06	1.06271e+06	1.00551e+06	1.13143e+06
acetoacetyl-CoA-nega	N/A	N/A	N/A	N/A	N/A	N/A	N/A	N/A	N/A	N/A	N/A	N/A	N/A	N/A	N/A	N/A	N/A	N/A
acetoacetyl-CoA-posi	16563.9	40787.7	48148.6	15012.5	9315.82	20175.9	59386.6	9317.23	17083.9	56416.4	68853.2	31060.8	161004	63204.4	91632.9	89046.3	110787	104581
acetyl-CoA-nega	N/A	N/A	N/A	N/A	N/A	N/A	7144.42	N/A	N/A	N/A	8697.95	N/A	N/A	N/A	N/A	N/A	N/A	N/A
acetyl-CoA-posi	63365.6	61189.5	80442.7	47834.3	30781.1	109023	216817	66160.2	177360	212451	418273	123935	131403	54453.6	166844	133873	150319	117408
Acetylcarnitine DL	7.20583e+07	8.04671e+07	7.79747e+07	5.85371e+07	6.01069e+07	8.20279e+07	1.09498e+08	9.50799e+07	1.11581e+08	9.40362e+07	1.04285e+08	1.15599e+08	1.04555e+08	9.7359e+07	1.14015e+08	9.59905e+07	9.80421e+07	9.7444e+07
Acetyllysine	6.487e+06	1.00824e+07	9.24839e+06	4.37079e+06	3.69589e+06	8.24269e+06	3.0812e+07	3.73384e+06	1.12125e+07	1.53214e+07	8.7903e+06	8.05966e+06	2.32604e+07	1.31154e+07	2.78437e+07	1.01572e+07	2.97158e+07	1.8681e+07
acetylphosphate	505490	530900	482494	317487	474341	429050	780877	410166	549856	572549	479790	574348	467350	383729	490900	703739	687415	846405
aconitate	8.2534e+06	8.99825e+06	6.52455e+06	6.2346e+06	4.99522e+06	6.50993e+06	6.47598e+06	4.49439e+06	6.09312e+06	7.88908e+06	6.15533e+06	6.78883e+06	1.33379e+07	1.02377e+07	1.1145e+07	1.17672e+07	1.18701e+07	1.204e+07
adenine	5.81677e+06	7.94545e+06	8.43073e+06	3.46496e+06	3.55604e+06	4.93602e+06	1.34957e+07	2.99919e+06	4.81186e+06	1.08289e+07	1.42243e+07	5.71155e+06	8.93202e+06	5.80143e+06	1.26259e+07	5.94058e+06	6.68098e+06	6.1126e+06
adenosine	199952	210775	311086	47550	118546	588911	775355	431142	847624	1.09524e+06	1.33247e+06	603854	547020	797665	758318	391143	681061	609139
adenosine 5-phosphosulfate	24849.4	13967.8	15529.1	22233.4	15456.9	N/A	39353.8	8282.74	28480.3	28444	52805.7	36759	31058.8	27438.8	37797.2	36743.5	25860.5	22715.2
ADP-D-glucose	N/A	N/A	N/A	N/A	N/A	N/A	N/A	N/A	N/A	6696.22	N/A	N/A	9842.32	N/A	N/A	N/A	5704.69	N/A
ADP-nega	3.07761e+06	3.6484e+06	3.22355e+06	1.87594e+06	1.73219e+06	2.03194e+06	5.34452e+06	1.79464e+06	3.82162e+06	4.55324e+06	6.01187e+06	4.5117e+06	4.751e+06	3.68908e+06	5.12878e+06	5.0634e+06	4.46183e+06	4.5581e+06
alanine	7.29036e+06	1.06926e+07	9.54049e+06	7.71663e+06	6.48143e+06	1.17976e+07	3.9302e+07	1.32086e+07	2.24916e+07	3.27365e+07	3.22351e+07	2.16702e+07	1.13443e+07	1.08024e+07	1.61114e+07	1.83526e+07	1.53071e+07	2.3616e+07
allantoate	46747.1	40773.4	34039.9	17082.2	30237.5	25825.3	128550	34071.4	90374.6	360223	219387	223637	75696.6	39263.2	39248.4	49535.6	74381.4	71565.2
allantoin	949363	1.33002e+06	997693	475427	453059	669926	3.98407e+06	776756	1.77451e+06	5.56613e+06	3.8229e+06	3.49184e+06	4.72811e+06	2.71305e+06	3.50526e+06	6.11275e+06	5.97593e+06	6.52917e+06
Aminoadipic acid	151395	241377	198021	203246	126887	180396	181871	124162	273571	387469	258700	353364	381322	305404	295241	382858	311819	343301
aminoimidazole carboxamide ribonucleotide	50557	45440.9	43474.4	23925.6	35872.5	53101.4	40194.1	10793.6	38251.6	77725.5	125951	83139.2	212646	325692	484602	193586	112367	90211.4
AMP	3.39772e+06	2.12871e+06	2.19427e+06	1.26339e+06	1.34649e+06	4.30223e+06	3.52812e+06	1.16596e+07	1.76744e+07	5.10265e+06	1.59497e+07	7.42641e+06	3.5676e+06	3.03501e+06	1.01534e+07	4.05333e+06	4.30574e+06	4.86242e+06
anthranilate	9832.7	9619.19	47130.5	N/A	4877.76	31170.7	12831.3	N/A	N/A	7497.48	N/A	20043.2	45833.7	17350.3	N/A	17769.6	28822.3	12673.1
arginine	3.2044e+07	4.97844e+07	4.44464e+07	2.21028e+07	2.36349e+07	2.94284e+07	1.43626e+08	3.42491e+07	6.98926e+07	1.16e+08	1.27547e+08	6.99206e+07	6.22299e+07	4.09834e+07	6.95395e+07	5.65614e+07	6.15194e+07	6.27879e+07
Ascorbic acid	2.9497e+06	5.40955e+06	4.20442e+06	1.6259e+06	1.56319e+06	2.82852e+06	1.23853e+07	2.97661e+06	7.16466e+06	1.99618e+07	2.04566e+07	8.7329e+06	6.04815e+06	3.17522e+06	7.66861e+06	6.0063e+06	7.74432e+06	6.17215e+06
asparagine	1.32114e+07	1.60198e+07	1.63755e+07	8.99134e+06	9.96101e+06	1.33649e+07	2.57751e+07	8.71615e+06	1.55872e+07	2.32061e+07	2.68724e+07	2.05576e+07	2.12026e+07	1.73893e+07	2.10002e+07	2.39498e+07	2.22827e+07	2.36508e+07
aspartate	7.07569e+06	1.03636e+07	7.5732e+06	4.92573e+06	4.61515e+06	5.00313e+06	4.87682e+06	1.68167e+06	1.66866e+06	4.44636e+06	3.17423e+06	3.96095e+06	1.32578e+07	9.42918e+06	1.36094e+07	1.03766e+07	1.15232e+07	1.11347e+07
ATP-nega	1.32105e+07	2.12122e+07	2.09368e+07	1.04391e+07	1.02429e+07	1.57733e+07	2.32295e+07	4.63134e+06	9.38405e+06	2.39916e+07	1.91376e+07	1.65869e+07	1.61787e+07	1.25549e+07	1.60309e+07	1.2916e+07	1.37422e+07	1.63026e+07
Atrolactic acid	54742.5	58131.9	93507.5	18023	29242.8	44429.2	65565.2	13030.9	41227.2	61473.9	37682.9	45408.3	70666.2	32872.5	55496.7	53483.9	70481.4	45683.2
betaine	1.30886e+07	1.18546e+07	1.24803e+07	9.49066e+06	1.33838e+07	1.30094e+07	3.20085e+07	2.91728e+07	3.63293e+07	3.28334e+07	1.46249e+07	3.57508e+07	1.5678e+07	1.45537e+07	1.50404e+07	2.90249e+07	2.03606e+07	3.41348e+07
betaine aldehyde	651488	644403	525616	470474	430383	619272	332868	524328	481181	321668	365747	526012	551445	518496	442304	367909	476468	485523
biotin	982499	902674	1.00551e+06	561014	528941	722939	949625	321775	1.2296e+06	780719	837681	767883	1.0237e+06	683041	796913	695400	824793	830924
butyryl-CoA	N/A	N/A	N/A	N/A	N/A	N/A	N/A	N/A	N/A	N/A	N/A	N/A	N/A	N/A	N/A	N/A	N/A	N/A
Carbamoyl phosphate	1.74809e+07	2.89436e+07	2.1635e+07	1.32122e+07	1.10861e+07	1.78754e+07	2.48976e+07	8.03927e+06	1.6319e+07	2.64386e+07	2.50244e+07	2.88851e+07	2.8563e+07	2.03245e+07	3.11268e+07	2.65835e+07	2.93105e+07	2.76786e+07
carnitine	9.20625e+07	9.14505e+07	8.50932e+07	8.09783e+07	7.72212e+07	8.89738e+07	6.70544e+07	8.0141e+07	8.57623e+07	7.13607e+07	7.62612e+07	8.39936e+07	8.25921e+07	8.63577e+07	7.57129e+07	6.53666e+07	7.32803e+07	6.48067e+07
CDP-choline	9835.7	20707.9	16567.3	8799.34	17601	26551.5	105613	38623.9	74552.6	108201	209676	62124.3	12930.3	19154.2	38310.6	16565.8	26922	20190.8
CDP-ethanolamine	44002.3	42450.9	43494.3	19135	25368	40893.6	102369	14467.5	77139.3	107680	111824	55357.4	60484.8	49178	71930	98885.9	68294.5	82628
CDP-nega	110425	109823	90598	44942.4	42777	74078.4	180191	61800.4	75444	118941	123265	78422.1	144274	76922	115407	108014	110977	96542.1
Cellobiose	114975	87485.5	70924.8	43487.4	43772.5	58499.1	165277	142371	184495	137993	207274	165750	157883	81882.5	131047	120527	126635	128872
cholesteryl sulfate	15090.9	23898.7	54014.8	N/A	7245.82	N/A	94573.3	17603.7	55196.8	286440	129821	42770.4	90593.6	21540.1	16868.3	53842.8	13839.4	54548.7
Cholic acid	N/A	N/A	N/A	N/A	N/A	N/A	7092.16	N/A	N/A	N/A	N/A	N/A	N/A	N/A	N/A	N/A	N/A	N/A
choline	268104	423217	381392	456115	254672	240967	574892	579828	313955	855525	737344	380851	407628	502688	448877	456546	498408	404742
Citraconic acid	1.41996e+07	1.39116e+07	1.45435e+07	1.04788e+07	9.81433e+06	1.47116e+07	2.91822e+07	1.13217e+07	2.10161e+07	3.78233e+07	3.4574e+07	2.57999e+07	2.16319e+07	1.74848e+07	2.15908e+07	2.21969e+07	2.15608e+07	2.27451e+07
citrate	9.89348e+07	1.11173e+08	1.09884e+08	7.04236e+07	6.83442e+07	8.48038e+07	1.16892e+08	4.9354e+07	8.99205e+07	1.29829e+08	1.34805e+08	1.19486e+08	1.52056e+08	1.22338e+08	1.33383e+08	1.342e+08	1.37379e+08	1.32456e+08
citrate-isocitrate	1.61907e+08	1.94412e+08	1.81223e+08	1.18235e+08	1.24294e+08	1.53079e+08	1.75832e+08	9.70282e+07	1.53595e+08	1.86127e+08	1.95854e+08	1.74012e+08	1.96038e+08	1.77538e+08	1.85948e+08	1.79866e+08	1.83738e+08	1.74479e+08
citrulline	594016	881584	598365	331453	364221	500266	1.51859e+06	397121	818684	1.35564e+06	624747	920722	664531	549764	761878	1.39689e+06	1.10971e+06	1.41861e+06
CMP	239078	184813	207304	153237	126319	301832	323109	248742	483626	446613	697887	289337	229828	205019	399155	251602	253589	234132
coenzyme A-nega	34165	67817.2	38317.1	26919.5	34152.3	22257.8	80141.8	12921	36236.8	108088	85939.4	48672	40461.7	27956	63599.5	43006.1	67812.4	63675.4
coenzyme A-posi	189815	374420	317268	150196	202356	261420	816435	167486	298738	845384	691262	474869	412755	346081	551657	359524	530484	554929
creatine	36292.3	38759.2	13024.7	32662.7	21457.5	24175.4	21458.8	29154.4	N/A	23609.9	22783.9	18299.6	28911.5	29841.3	11850.3	13309	21799.9	16365
Creatinine	14536.5	59224.7	13267.3	N/A	7025.47	23203.4	71615.9	13396.1	N/A	41856.3	48696.6	24176.2	38179.1	121282	43207.5	54518.7	39639.8	66295.7
CTP-nega	147008	255466	271781	105216	95118.2	177038	N/A	39280.8	55394	218710	N/A	N/A	N/A	N/A	N/A	15092.4	N/A	N/A
cyclic bis(3->5) dimeric GMP	N/A	N/A	N/A	N/A	N/A	N/A	N/A	N/A	N/A	N/A	N/A	N/A	N/A	N/A	N/A	N/A	N/A	N/A
cyclic-AMP	145509	247080	190912	79360.4	82206.5	144098	270676	49818	145045	331395	217539	169999	263250	146150	255617	274026	320583	269556
cystathionine	254706	427516	308555	188113	139260	245947	805336	194102	320690	482136	321325	313310	537953	329196	663365	495889	419572	445744
cysteine	20879.2	34802.3	26147.6	9473.77	23960.5	35440.4	74982.4	17175.1	52493.6	63834.5	35903.4	50726.4	44123.9	34997	73749.8	45919.8	40707.4	45444.7
Cystine	14764.2	19598.6	25888.4	8147.37	N/A	12339.7	10590.4	9831.61	12404.3	N/A	9898.18	N/A	22897.3	N/A	N/A	20044.8	26906.6	N/A
cytidine	209509	336159	261675	142884	109231	217822	489402	123348	337029	788328	569434	233156	835895	331611	688563	630906	652267	495530
cytosine	74130.7	69722	99827.4	23819.6	23072.8	62539	124273	65134.8	56149	300162	102223	159682	159858	94329.9	89376.1	152247	160796	148943
D-erythrose-4-phosphate	1.12104e+06	1.44547e+06	1.36835e+06	601018	793015	1.13963e+06	2.40575e+06	747889	1.49894e+06	1.96482e+06	1.7468e+06	1.67518e+06	1.38402e+06	956567	1.34472e+06	1.74905e+06	2.17353e+06	2.08546e+06
D-glucarate	41419.8	64772.1	45620.3	14416.9	20528.2	33810.4	56840.1	21134.8	47532.7	48367.1	63423.5	26759.2	86885.4	41563.1	45837.3	63532.7	71612.6	77493.3
D-gluconate	1.18771e+06	1.71724e+06	1.37348e+06	568941	595879	930317	2.94669e+06	609760	1.64106e+06	2.38462e+06	1.59371e+06	1.64428e+06	1.78838e+06	802791	1.54686e+06	1.62195e+06	1.94502e+06	2.22323e+06
D-glucono-?-lactone-6-phosphate	35451.4	52395.4	40476	30121	34273.7	46323.7	73837.8	31526.3	69408.2	100721	49230.8	61744.5	61323	33440	42584.6	55021.5	76538.8	98504.5
D-glucosamine-1-phosphate	24331.1	55401.1	43377.1	28999.3	23291.7	11662.2	58381.3	17554	34688	41967.3	39937.4	26226.8	6656.75	36231.6	39854.5	46244.5	52794.4	76715.6
D-glucosamine-6-phosphate	288788	177154	239544	126319	262247	388117	700484	528384	692668	497856	225576	990856	609053	506676	387338	819646	982283	1.10657e+06
D-glyceraldehdye-3-phosphate	271480	402570	342355	180973	179217	242739	386534	148389	300934	428797	237344	433419	391756	348270	344919	490454	563714	556758
D-sedoheptulose-1-7-phosphate	2.25537e+06	2.79465e+06	2.76826e+06	1.26037e+06	1.59845e+06	2.22547e+06	8.90434e+06	2.48624e+06	5.6909e+06	7.84056e+06	5.96561e+06	5.83151e+06	4.24602e+06	2.61774e+06	4.15413e+06	6.69167e+06	7.53617e+06	1.28555e+07
dAMP	137223	199731	226278	132459	93670.5	182752	380492	115157	226455	274363	368575	207015	214270	222307	373136	365912	208816	291882
dATP-nega	15018.9	12931.4	20190.8	12423.5	N/A	15478.9	97383.4	12425.5	27956.8	75557.3	97331.2	54884.1	22532.7	13979.5	26299	15013.9	12432.1	26412.5
dCDP-nega	N/A	7246.63	N/A	N/A	N/A	N/A	7752.37	N/A	N/A	N/A	11819.1	N/A	N/A	N/A	N/A	N/A	N/A	N/A
dCMP	N/A	N/A	N/A	N/A	N/A	N/A	10846.9	N/A	13978.2	8841.75	11906.6	12352	15007.9	N/A	8808.1	N/A	8237.25	N/A
dCTP-nega	14494.7	10867.5	5176.49	N/A	N/A	10350.8	18146.7	N/A	N/A	26414.2	15525	7246.2	15515.8	N/A	13438.4	18121.2	10682	N/A
deoxyadenosine	30168	32424.9	33363.2	13449.7	19074.3	21131	63488.4	24179	42384.9	41260.3	60468.1	51444.7	34929.9	21128.5	21659.9	17780.6	41049.2	26067
Deoxycholic acid	N/A	N/A	N/A	N/A	N/A	N/A	N/A	N/A	N/A	N/A	N/A	N/A	N/A	N/A	N/A	N/A	N/A	N/A
deoxyguanosine	113454	160384	153433	51772.8	49623.3	90652.5	580331	100698	306852	1.3011e+06	1.06072e+06	427464	54223.2	15310.8	38713.4	34379.9	31883	32609.7
deoxyinosine	24656.4	58804	41310.5	16054.1	N/A	25513.8	158001	33823.2	79192.3	315817	188863	90272.1	53173.8	27032	54714.7	68045.3	60450.5	45033.8
deoxyribose-phosphate	290308	386046	287353	167340	140617	192510	413133	152682	231438	346582	290030	281953	690793	237013	651609	690898	591471	498951
deoxyuridine	N/A	N/A	N/A	N/A	N/A	N/A	N/A	N/A	N/A	N/A	N/A	N/A	N/A	11273.4	N/A	N/A	N/A	N/A
dephospho-CoA-nega	N/A	5176.4	8799.08	N/A	N/A	9318.25	16042.9	N/A	13422.2	15532.3	11908.8	6103.96	13706.2	9328.99	12940.1	15516.2	13973.9	23955.6
dephospho-CoA-posi	11983.9	24866.1	25389.4	N/A	14580	21240.1	46598.7	21421.6	22602.6	47026.5	57460.2	37373	59750	39052	47488.6	65228.6	32750.9	53129.4
dGDP-nega	3.0106e+06	3.76221e+06	3.42879e+06	1.79085e+06	1.63174e+06	2.1798e+06	5.43478e+06	1.74196e+06	3.75102e+06	4.5037e+06	6.1249e+06	4.44122e+06	4.74966e+06	3.52987e+06	5.32912e+06	5.12381e+06	4.38875e+06	4.27869e+06
dGMP	13939.6	N/A	N/A	N/A	N/A	N/A	N/A	N/A	N/A	N/A	5595.04	N/A	14294.2	N/A	11800.2	N/A	15857.2	6452.49
dGTP	1.31401e+07	2.07286e+07	2.02318e+07	1.06816e+07	9.8742e+06	1.59643e+07	2.35203e+07	4.63807e+06	9.0084e+06	2.33224e+07	1.8917e+07	1.74004e+07	1.65851e+07	1.26947e+07	1.60762e+07	1.32007e+07	1.36593e+07	1.68095e+07
dihydroorotate	681676	643313	584886	398174	448341	392793	1.92258e+06	1.1629e+06	1.77061e+06	3.20612e+06	1.67763e+06	2.43989e+06	1.06111e+06	888019	542407	923617	1.01402e+06	871588
dihydroxy-acetone-phosphate	545284	776396	627969	368464	314708	465340	1.49998e+06	483696	910615	1.18244e+06	525667	1.27572e+06	686832	432490	543187	796894	818690	999382
Diiodothyronine	N/A	N/A	N/A	N/A	N/A	N/A	N/A	N/A	N/A	N/A	N/A	N/A	N/A	N/A	N/A	N/A	N/A	N/A
dimethylglycine	731476	1.00115e+06	826858	475798	551774	686772	1.33735e+06	401623	693991	597347	358178	683395	719688	560450	843446	1.03786e+06	1.07205e+06	1.2895e+06
DL-Pipecolic acid	1.0242e+08	1.20248e+08	1.09096e+08	7.81247e+07	7.67989e+07	9.45113e+07	1.49585e+08	1.11036e+08	1.32081e+08	1.41099e+08	1.45028e+08	1.39759e+08	1.34271e+08	1.281e+08	1.39198e+08	1.47187e+08	1.3965e+08	1.40377e+08
dTDP-nega	N/A	N/A	11184.8	N/A	N/A	N/A	27515.9	N/A	8452.87	12878.6	21179.4	11075.8	14113.6	7784.98	7061.29	9939.68	N/A	7526.12
dTMP	N/A	N/A	15008.7	5682.17	9318.26	9315.5	N/A	9192.33	15520.8	12431.2	N/A	N/A	6684.82	N/A	8642.63	N/A	11381.5	12300.8
dTMP-nega	N/A	N/A	N/A	N/A	N/A	N/A	17008.9	16503.7	35177.9	12133.8	11911.7	10154.4	14954.3	16934.6	24849.6	9918.03	N/A	N/A
dTTP-nega	13268.3	26403.2	14075.4	17065.8	12936.7	29013.8	86455.8	14541.8	26403.5	49962.4	38809.4	34624.8	22511.3	22442.8	27839.1	22538	26799.2	24852.9
dUMP-nega	N/A	N/A	N/A	N/A	N/A	N/A	8590.06	N/A	N/A	N/A	N/A	N/A	6723.06	N/A	N/A	N/A	N/A	N/A
dUTP-nega	N/A	N/A	N/A	N/A	N/A	N/A	N/A	N/A	N/A	N/A	N/A	N/A	N/A	N/A	N/A	N/A	N/A	N/A
ethanolamine	N/A	N/A	N/A	N/A	N/A	N/A	N/A	N/A	N/A	N/A	N/A	N/A	N/A	N/A	N/A	N/A	N/A	N/A
FAD	246489	360311	475124	194629	215887	305959	872826	165144	352025	891090	763574	549294	568990	302853	404305	444690	403837	538209
Flavone	66236.7	48606.2	52298.3	18874.1	26406.3	21726.9	30002.7	45093.5	74210.6	65894	70441.9	88042.1	154814	69749.1	62815.4	124543	151842	131165
FMN	N/A	N/A	N/A	N/A	N/A	N/A	N/A	N/A	N/A	N/A	N/A	N/A	N/A	N/A	N/A	N/A	N/A	N/A
folate	16044.5	22777.4	16426.6	9326.91	N/A	8801.24	16031.3	15012.5	17603.2	25306.6	29039.7	13496.8	50184.5	28470.7	26320.4	17256.4	29510.6	23300.4
fructose-1,6-bisphosphate	1.29613e+06	1.84293e+06	1.79419e+06	778106	830229	1.03925e+06	2.51754e+06	736094	1.31787e+06	1.73266e+06	1.0781e+06	1.86149e+06	1.32396e+06	851523	1.32968e+06	1.65158e+06	1.52658e+06	1.55514e+06
fructose-6-phosphate	2.50904e+06	3.34458e+06	2.80206e+06	1.44868e+06	1.67602e+06	2.48276e+06	6.47342e+06	1.86727e+06	3.53032e+06	4.83134e+06	4.30049e+06	4.04972e+06	3.15528e+06	2.21741e+06	2.63943e+06	3.72797e+06	4.49828e+06	5.4521e+06
fumarate	1.56638e+07	1.89958e+07	1.79294e+07	1.36329e+07	1.34118e+07	1.87946e+07	3.03453e+07	1.61986e+07	2.3465e+07	3.18052e+07	2.98062e+07	2.5718e+07	1.53666e+07	1.50143e+07	1.67801e+07	2.15998e+07	2.21197e+07	2.55255e+07
GDP-nega	21741.9	26915	36223.7	13460.7	20191.8	15087.3	57463.9	9837	27929.4	47121.1	65684.7	45556.4	29930.7	16030.7	28989.9	36598.2	38310	37949
Geranyl-PP	118255	64069	63542.4	48447.2	35986.4	23464.3	260513	107157	38625.9	49912.8	32869.6	65298	220752	41023.6	93026.1	99843.1	96546.3	222814
glucono-?-lactone	55475.8	74417.4	48651.9	29507.9	19433.1	45419.2	117697	33846.1	55327.6	87091.3	44504.7	69452	61017.6	46991.7	77122	65660.9	117270	88516.2
glucosamine	174562	194844	175263	100101	66188.3	159697	116816	141582	302672	240780	253198	147771	118616	95360.1	113772	157287	343445	107358
glucose-1-phosphate	686541	813920	727211	377597	327748	587827	1.66322e+06	499225	983708	1.66944e+06	1.44804e+06	1.07894e+06	1.06116e+06	685784	1.06462e+06	1.32224e+06	1.48126e+06	1.52902e+06
glucose-6-phosphate	2.40187e+06	3.04336e+06	2.55055e+06	1.27466e+06	1.61528e+06	2.32167e+06	6.29962e+06	1.84521e+06	3.45624e+06	4.89888e+06	4.43727e+06	3.86065e+06	3.27982e+06	2.02791e+06	2.60216e+06	3.56441e+06	4.59056e+06	4.73018e+06
glutamate	5.41031e+07	5.83881e+07	5.39783e+07	4.2168e+07	3.13356e+07	4.94959e+07	5.21424e+07	2.46964e+07	3.51077e+07	5.24341e+07	5.5668e+07	4.37094e+07	7.42368e+07	6.07841e+07	7.04696e+07	7.18496e+07	7.06988e+07	6.68704e+07
glutamine	7.12673e+07	8.47351e+07	7.92814e+07	4.61192e+07	4.7929e+07	7.13047e+07	1.32451e+08	8.34463e+07	1.22696e+08	1.37992e+08	1.36944e+08	1.32863e+08	1.28186e+08	9.64877e+07	1.23028e+08	1.34275e+08	1.32333e+08	1.34941e+08
glutathione	3.84672e+06	7.74575e+06	5.34171e+06	3.8679e+06	3.41744e+06	4.74217e+06	1.71269e+07	5.47684e+06	1.00427e+07	1.66392e+07	1.10723e+07	1.1534e+07	8.35109e+06	9.32505e+06	1.64871e+07	7.62495e+06	1.19401e+07	1.0829e+07
glutathione disulfide-nega	1.26478e+06	2.09181e+06	1.66142e+06	817166	696326	1.37572e+06	3.75551e+06	1.05088e+06	2.22e+06	2.95142e+06	1.67463e+06	2.28376e+06	5.35212e+06	2.08565e+06	3.00571e+06	3.88349e+06	2.31207e+06	2.67942e+06
glutathione disulfide-posi	724949	971394	1.07674e+06	577094	588117	891808	1.83953e+06	837565	1.76117e+06	1.83587e+06	1.23458e+06	1.81533e+06	3.32586e+06	1.37568e+06	1.76038e+06	2.04727e+06	1.39598e+06	1.30152e+06
glutathione-nega	1.3866e+06	2.4962e+06	1.99218e+06	895077	968324	1.4338e+06	5.36926e+06	1.43685e+06	3.31406e+06	4.21604e+06	3.42065e+06	3.75538e+06	2.96008e+06	2.70372e+06	5.93959e+06	2.33662e+06	3.94034e+06	3.41787e+06
glycerate	261052	371305	352539	166444	180440	271321	507177	157676	309084	584089	286613	360420	388172	227493	485656	475676	388198	411986
Glycerophosphocholine	1.0406e+07	1.52082e+07	1.46093e+07	6.15214e+06	6.62043e+06	8.77794e+06	3.05657e+07	8.71459e+06	1.61142e+07	2.97242e+07	2.88559e+07	2.06191e+07	2.2142e+07	1.50076e+07	2.19422e+07	1.84523e+07	2.17812e+07	1.90823e+07
glycine	N/A	N/A	N/A	N/A	N/A	N/A	N/A	N/A	N/A	N/A	N/A	N/A	N/A	N/A	N/A	N/A	N/A	N/A
glycolate	14999.7	41517.5	45903.6	22696.4	N/A	36978.1	23794.2	9924.8	20677	40641.7	26991	15598.1	28496	20409	24622.9	15962.7	18302	28641.8
glyoxylate	51302.2	N/A	67450.2	N/A	186468	260939	N/A	219042	N/A	N/A	N/A	69592.7	72417.4	N/A	49935.9	N/A	N/A	N/A
GMP	205010	105614	129332	46600.4	49173.3	298728	197611	826784	1.32076e+06	260425	995533	367016	214300	149620	588105	192585	283177	172882
GTP-nega	129467	226121	261070	98100.7	104501	175976	309610	53317	126974	353775	365197	273169	222303	8774.3	246491	210440	218988	196772
Guanidoacetic acid	147286	259606	166003	89385.1	83127.9	158396	396023	150289	298886	754870	591706	397439	270271	163866	312265	269747	321860	252595
guanine	4.79859e+06	6.14807e+06	5.29722e+06	3.21579e+06	2.48462e+06	4.77163e+06	6.12588e+06	1.6062e+06	3.80908e+06	7.54947e+06	7.30034e+06	3.42742e+06	691171	403409	456253	440774	597517	509517
guanosine	221377	308575	358779	132645	113252	226850	505460	100304	277515	583470	552582	228879	492520	261339	362135	380349	442847	345083
guanosine 5-diphosphate,3-diphosphate	21616.3	21771.7	24730.4	9836.5	N/A	12972.9	34715.9	N/A	12946.1	39319	35288.2	7250.49	34683.8	13939.3	28472.2	29510.3	40147.4	45031.7
hexose-phosphate	2.92615e+07	3.62305e+07	3.1915e+07	1.73774e+07	2.00159e+07	2.9239e+07	6.08542e+07	2.05366e+07	3.70152e+07	5.10612e+07	4.56051e+07	3.92739e+07	3.62604e+07	2.36166e+07	3.43553e+07	4.22312e+07	4.82834e+07	5.50344e+07
histidine	8.72772e+07	1.14359e+08	1.06461e+08	5.8242e+07	7.02943e+07	8.24193e+07	1.38769e+08	6.80175e+07	1.19309e+08	1.38847e+08	1.38982e+08	1.27495e+08	1.34541e+08	1.03498e+08	1.2755e+08	1.33075e+08	1.42721e+08	1.46973e+08
histidinol	N/A	N/A	N/A	N/A	N/A	N/A	N/A	N/A	N/A	N/A	N/A	N/A	N/A	N/A	N/A	N/A	N/A	N/A
homocysteic acid	N/A	10486.8	N/A	N/A	N/A	11389.1	10349.5	N/A	8951.71	11342.5	9971.34	N/A	18718.2	N/A	14496.1	18310.9	21715.1	25370.8
homocysteine	16699.3	15342.9	44812.1	10189.5	12924.3	10198.9	17245.3	15473.4	10876	N/A	10182.2	34373.7	61131.3	13569.1	14788.2	14830.4	56567	52610.5
homoserine	128361	126717	149355	80317.6	129783	154160	230876	58848.1	146353	125481	40471.1	176183	417829	239693	396327	601990	618656	1.05881e+06
Hydroxyisocaproic acid	191112	230842	160555	131720	102663	151536	382409	112526	163581	381993	342250	255296	262476	161405	249049	300956	296536	274084
Hydroxyphenylacetic acid	508722	805532	565571	271947	206453	346326	872814	307054	543079	700081	548318	455218	991299	585397	783527	961560	991856	933217
hydroxyphenylpyruvate	43841.8	46653.7	34001.9	17782.8	16276.3	42376.2	236738	58206	121917	123829	80563.2	45764.9	50535.7	44859.3	73568	68844.1	98477.4	64815.9
hydroxyproline	33859.8	52735.8	51138.9	16849.3	21426.4	38278.4	54671	24470	25329.8	48682.6	37806.7	47589.1	26203.8	13628	23666.9	31789	40842	89518.7
hypoxanthine	126931	135694	101887	80256	49443.5	168088	558173	111013	217145	364656	260439	274154	213989	103699	502984	257121	236435	339378
IDP-nega	407657	437445	403680	251803	214312	248346	778208	251953	507158	583735	754546	523361	578074	438112	639457	603185	554969	556040
Imidazole	N/A	N/A	N/A	N/A	N/A	N/A	N/A	N/A	N/A	N/A	N/A	N/A	N/A	N/A	N/A	N/A	N/A	N/A
Imidazoleacetic acid	225168	255089	269428	115939	154953	193571	440053	232390	318604	N/A	324851	594925	238129	176496	221841	238183	353017	297889
IMP	497507	399165	463128	223635	327522	779173	2.94667e+06	2.32214e+06	4.78731e+06	2.32759e+06	4.08879e+06	2.26218e+06	694859	521301	1.3586e+06	988563	1.18326e+06	1.13737e+06
indole	492930	807970	750474	337559	309232	433758	1.10371e+06	255532	398525	897710	1.33594e+06	465609	717791	536769	1.05755e+06	648554	603366	513910
Indole-3-carboxylic acid	120637	129401	125814	83139.3	86261.2	116046	101475	113842	156628	289192	152002	172868	229115	196941	144212	343904	252975	289498
Indoleacrylic acid	174421	N/A	N/A	45467.3	43902.2	44618.1	N/A	45493.1	85960.3	N/A	N/A	N/A	N/A	241911	57553.8	305071	386504	265579
inosine	6.04072e+06	7.61918e+06	8.10496e+06	3.71275e+06	2.77505e+06	4.52314e+06	3.61637e+07	6.01153e+06	1.77631e+07	3.93568e+07	2.63808e+07	1.09151e+07	2.29692e+07	8.00726e+06	1.59997e+07	1.35484e+07	1.97602e+07	1.28453e+07
isocitrate	1.13726e+06	1.46685e+06	1.42281e+06	810072	770337	1.01844e+06	1.51182e+06	729195	1.10082e+06	1.82611e+06	1.96554e+06	1.70411e+06	2.59649e+06	1.82067e+06	1.91838e+06	1.909e+06	2.01763e+06	1.77133e+06
Kynurenic acid	473806	592195	615972	357382	262068	492788	1.10607e+06	282892	553481	706032	1.02854e+06	401781	442285	198163	322736	322556	459351	354660
Kynurenine	352801	564873	492257	198269	183266	374353	3.72361e+06	456297	944611	3.63258e+06	2.95305e+06	1.20626e+06	60256.7	40763.5	135295	147774	74677.6	91898.2
L-arginino-succinate	2.6179e+06	3.41437e+06	3.45831e+06	1.98964e+06	1.85986e+06	3.07129e+06	6.74374e+06	2.21524e+06	4.39326e+06	7.18365e+06	7.40339e+06	4.09451e+06	2.77487e+06	2.3923e+06	2.71266e+06	2.46321e+06	3.8691e+06	3.53433e+06
lactate	2.55537e+06	5.12416e+06	4.23463e+06	1.7986e+06	1.65794e+06	6.76131e+06	9.62969e+07	1.88672e+07	4.57007e+07	7.21725e+07	6.47784e+07	3.82703e+07	1.87949e+06	1.27947e+06	1.38623e+07	2.64359e+06	5.18367e+06	5.53302e+06
leucine-isoleucine	2.60884e+07	4.6023e+07	4.06199e+07	1.60228e+07	1.63626e+07	3.46467e+07	9.96168e+07	2.2077e+07	4.62618e+07	1.10569e+08	1.15088e+08	5.58089e+07	7.42658e+07	3.95743e+07	7.17724e+07	6.84274e+07	6.91015e+07	6.96048e+07
lipoate	N/A	10432.2	9327.32	N/A	N/A	N/A	12433	N/A	N/A	11639	8336.53	N/A	11249.5	N/A	11903.7	N/A	11390.4	12409.2
lysine	3.35498e+06	5.80364e+06	4.24722e+06	1.94525e+06	2.18203e+06	3.48196e+06	1.50891e+07	1.55279e+06	3.73995e+06	1.27964e+07	1.23651e+07	7.25577e+06	1.3454e+07	7.70467e+06	1.26056e+07	1.40788e+07	1.34054e+07	1.385e+07
malate	8.10899e+07	9.53436e+07	8.94537e+07	7.34059e+07	7.27956e+07	9.77258e+07	1.20385e+08	8.52272e+07	1.10364e+08	1.3276e+08	1.29303e+08	1.18299e+08	7.34156e+07	7.38367e+07	7.66041e+07	9.41135e+07	9.52639e+07	1.06899e+08
Maleic acid	1.54881e+07	2.00874e+07	1.78759e+07	1.43396e+07	1.34128e+07	1.89914e+07	3.04054e+07	1.59279e+07	2.27339e+07	3.16068e+07	2.81188e+07	2.59382e+07	1.49275e+07	1.45375e+07	1.65552e+07	2.20396e+07	2.14248e+07	2.45859e+07
malonyl-CoA-nega	N/A	N/A	N/A	N/A	N/A	N/A	N/A	N/A	N/A	N/A	N/A	N/A	N/A	N/A	N/A	N/A	N/A	N/A
malonyl-CoA-posi	N/A	9835.85	N/A	N/A	N/A	N/A	13445.3	N/A	N/A	20188.2	9835.54	8805.65	N/A	N/A	N/A	N/A	8305.74	13963.4
methionine	3.61549e+06	6.50632e+06	3.9718e+06	2.01285e+06	1.47379e+06	2.79098e+06	1.14488e+07	1.30255e+06	4.16186e+06	1.34792e+07	9.32826e+06	4.3946e+06	1.09021e+07	5.0927e+06	1.06039e+07	7.50085e+06	9.33278e+06	7.50436e+06
Methionine sulfoxide	5.6172e+06	8.55963e+06	7.92781e+06	3.60146e+06	4.35321e+06	5.5394e+06	1.16715e+07	4.40866e+06	6.74694e+06	5.02085e+06	3.42055e+06	1.28519e+07	1.61556e+07	9.39441e+06	1.38236e+07	1.08815e+07	1.69082e+07	2.12286e+07
Methylcysteine	5.25515e+06	6.32246e+06	8.08238e+06	3.51374e+06	3.03364e+06	4.30733e+06	1.21116e+07	2.84124e+06	4.18973e+06	1.05714e+07	1.36785e+07	5.97278e+06	7.81885e+06	6.13513e+06	1.28509e+07	6.00041e+06	6.38958e+06	5.29244e+06
Methylmalonic acid	1.11749e+07	1.12344e+07	1.06711e+07	7.14751e+06	6.18111e+06	9.85615e+06	4.01059e+07	1.67995e+07	2.66827e+07	2.49889e+07	2.527e+07	1.51381e+07	2.24761e+07	1.67821e+07	2.48865e+07	2.25832e+07	2.38319e+07	1.99821e+07
methylnicotinamide	205601	251093	276699	87173.1	87967.3	175148	1.21415e+06	204796	624402	1.54981e+06	1.10121e+06	388008	809078	312427	477521	400734	622886	455859
myo-inositol	1.26069e+07	1.35524e+07	1.04709e+07	5.1405e+06	6.59734e+06	6.96471e+06	1.57584e+07	4.01396e+06	6.42349e+06	9.06466e+06	2.9306e+06	8.34624e+06	1.2617e+07	5.98698e+06	1.01564e+07	1.74887e+07	1.47576e+07	1.74475e+07
N-acetyl-glucosamine	70093.2	92310.4	90519.6	43016.1	56938.7	74404.9	1.54654e+06	458843	619756	301711	166401	806378	170490	83111.1	172112	196946	173312	221046
N-acetyl-glucosamine-1-phosphate	1.08381e+06	1.37449e+06	1.25547e+06	605789	593696	851701	2.37804e+06	695398	1.50616e+06	2.10779e+06	1.39858e+06	1.54471e+06	2.02287e+06	1.66589e+06	2.5965e+06	2.38372e+06	2.74266e+06	3.14907e+06
N-acetyl-glutamate	119960	157364	130744	41427.9	64404.1	119670	205971	46826.1	106215	439805	449534	189310	146563	94601.1	197321	198997	225794	256660
N-acetyl-glutamine	110739	150876	108560	15757.5	74931.9	17155	65109.3	67733.4	34413.9	774560	69611.4	558474	284499	88245.9	349600	197769	129566	317291
N-Acetyl-L-alanine	560325	842851	826058	339296	303997	455381	765689	274174	380920	869408	1.37655e+06	493694	1.20063e+06	759075	1.32918e+06	904095	859120	662351
N-acetyl-L-ornithine	N/A	N/A	7372.49	N/A	N/A	N/A	N/A	9717.7	10891.6	N/A	N/A	N/A	N/A	N/A	N/A	N/A	N/A	N/A
N-Acetylputrescine	N/A	22488	N/A	8549.17	7011.98	N/A	27845.2	28609.1	10460.9	21723.3	15424.5	13131.5	24604.3	21030.9	N/A	14961.6	35056.2	20238.5
N-carbamoyl-L-aspartate	27435.7	31612.3	29978.3	14475.5	N/A	24856.5	28164	7346.32	21233.7	38072.9	20740.8	19504.4	41649.4	24651.7	36118.9	30447.1	45390	32341.1
N-carbamoyl-L-aspartate-nega	43420.2	51491.4	37218.9	22364.4	25587.2	16927.8	143897	32837.9	96724.2	334248	167869	160870	49128.8	38182.7	44010.9	62985.4	64921.5	59795.9
N6-Acetyl-L-lysine	9.61327e+06	1.48694e+07	1.11966e+07	4.89508e+06	4.48178e+06	8.54718e+06	3.5177e+07	4.32319e+06	1.17756e+07	1.86166e+07	1.99496e+07	1.04195e+07	2.8368e+07	1.63044e+07	3.48403e+07	1.0247e+07	3.49407e+07	2.28488e+07
NAD+_nega	3.99348e+06	5.0507e+06	5.01608e+06	2.69698e+06	2.64966e+06	3.76994e+06	5.37106e+06	1.91975e+06	3.54187e+06	5.55969e+06	5.9324e+06	4.13092e+06	5.68897e+06	4.97541e+06	5.79565e+06	6.00013e+06	5.31194e+06	5.1315e+06
NAD+_posi	9.56062e+06	1.09614e+07	1.31592e+07	6.16515e+06	7.11349e+06	1.07058e+07	1.4638e+07	5.04531e+06	8.93271e+06	1.41496e+07	1.59644e+07	1.18324e+07	1.52065e+07	1.34774e+07	1.61898e+07	1.30745e+07	1.4248e+07	1.35858e+07
NADH	106798	128387	153753	76621.3	87493.8	132019	289904	59537.9	74563	379444	327696	147547	214850	225701	224160	260410	221570	229982
NADH-nega	16048.5	24847.6	16566.7	6729.42	16046.6	18634.5	30545.1	7765.56	9818.94	27812.3	33650.5	10867.7	28473.8	20702.3	31066.6	37280.3	23284.5	23813.3
NADP+_nega	164985	324600	268173	134040	150137	159000	383542	92658.9	209151	340125	285258	232970	365673	243494	288358	372204	315801	289914
NADP+_posi	508875	589921	703295	382542	400688	442452	848159	312095	551316	766218	672079	655997	856665	652284	642263	745530	739859	676704
NADPH	81659.5	98831.2	105612	53323.5	59045.7	78621.4	150060	62642.4	110262	184682	175171	184988	217956	85155.3	148048	158741	155383	176870
NADPH-nega	N/A	9835.52	11390.2	N/A	N/A	8282.49	9316.63	N/A	4659.2	15007.9	6210.76	10872.1	10344.3	N/A	7744.88	5695.02	16587.5	10870.7
Ng,NG-dimethyl-L-arginine	4.07069e+06	2.77471e+06	5.79912e+06	1.07188e+06	2.31666e+06	3.91699e+06	5.40532e+06	809081	1.45111e+06	4.34368e+06	3.72605e+06	2.38823e+06	3.28464e+06	1.9631e+06	4.10991e+06	2.91314e+06	3.77804e+06	3.87916e+06
nicotinamide	4.05659e+06	7.4036e+06	5.89549e+06	2.14367e+06	1.93501e+06	3.67359e+06	7.78268e+06	1.29798e+06	2.94512e+06	7.82588e+06	6.15184e+06	3.95641e+06	8.23495e+06	5.15229e+06	9.88732e+06	8.59341e+06	9.32699e+06	8.46543e+06
Nicotinamide ribotide	148695	167419	187544	91104.7	106553	208902	232855	159801	189820	179484	279556	201791	218771	215880	173421	180389	179526	232166
nicotinate	148098	125408	118805	44343.5	51922.4	83260.4	279420	165242	161618	220299	187871	192570	267484	104018	229002	264961	233674	122798
O-acetyl-L-serine	N/A	N/A	N/A	N/A	N/A	N/A	N/A	N/A	N/A	N/A	N/A	N/A	N/A	N/A	N/A	N/A	N/A	N/A
O8P-O1P	433171	456087	428173	210964	274670	377119	968389	241681	553065	752339	543203	586053	569258	391708	659596	895186	926984	1.00037e+06
OBP	84453.7	154875	92066	53633.5	54964.7	143363	351972	60681.8	147832	231390	55684.6	164121	N/A	57387	57112.5	116763	130695	114248
ornithine	849171	2.06943e+06	1.72685e+06	673437	1.13949e+06	1.31429e+06	5.57263e+06	840246	1.99312e+06	4.59609e+06	1.82012e+06	6.55707e+06	4.37221e+06	2.39821e+06	5.32719e+06	6.54242e+06	9.96311e+06	1.09698e+07
orotate	1.85856e+06	2.03456e+06	2.38993e+06	1.25419e+06	1.02499e+06	1.67556e+06	2.04784e+06	990663	1.26476e+06	3.01592e+06	2.31712e+06	2.88351e+06	4.59978e+06	2.76963e+06	3.90035e+06	3.59234e+06	3.73244e+06	3.88385e+06
orotidine-5-phosphate	12535	12747.9	30368.4	N/A	N/A	11657.6	58381.5	N/A	20999.3	38113.1	22873.9	33854.3	15994.6	17770.5	11354.1	26557	27070.3	22436.3
oxaloacetate	4.70271e+06	5.28276e+06	4.36265e+06	2.10673e+06	3.12728e+06	3.43163e+06	2.93309e+06	1.42716e+06	2.40166e+06	3.94998e+06	3.08506e+06	5.24333e+06	3.91685e+06	2.65529e+06	4.15967e+06	2.54476e+06	2.2697e+06	3.85184e+06
p-aminobenzoate	6.03991e+06	8.13189e+06	5.44174e+06	2.71353e+06	1.87832e+06	2.12527e+06	1.02473e+07	3.21022e+06	3.79923e+06	2.29959e+06	814229	1.54701e+06	1.18568e+07	6.01785e+06	6.77811e+06	9.72629e+06	8.37108e+06	6.80856e+06
p-hydroxybenzoate	1.92876e+06	2.91474e+06	2.3373e+06	1.14149e+06	1.01054e+06	1.36895e+06	2.72247e+06	1.20991e+06	1.88508e+06	3.16965e+06	2.6192e+06	3.45104e+06	3.49248e+06	2.59034e+06	3.2951e+06	3.69804e+06	3.89326e+06	3.46576e+06
pantothenate	3.07003e+06	9.76177e+06	8.06789e+06	3.05607e+06	2.3198e+06	4.84675e+06	8.53834e+06	1.89704e+06	6.53487e+06	2.1078e+07	1.92855e+07	1.19219e+07	1.82077e+07	9.50459e+06	1.93894e+07	1.51323e+07	1.77759e+07	1.60495e+07
phenylalanine	7.03342e+06	1.23318e+07	1.06998e+07	4.21864e+06	3.94634e+06	6.4489e+06	2.82883e+07	4.34287e+06	1.08805e+07	3.20588e+07	3.38423e+07	1.31111e+07	1.73956e+07	1.03419e+07	2.05563e+07	1.34835e+07	1.50607e+07	1.31722e+07
Phenyllactic acid	128970	135315	127580	37727.1	49330.2	93690.2	389460	72477.9	129845	434840	406871	133109	215770	95380.6	270834	210348	241093	158075
Phenylpropiolic acid	6.61144e+06	8.84368e+06	7.80953e+06	3.87186e+06	4.45843e+06	5.58835e+06	2.29672e+07	8.0675e+06	1.67517e+07	2.36598e+07	2.43938e+07	2.13886e+07	1.80762e+07	1.03498e+07	1.74439e+07	2.14009e+07	2.06311e+07	2.02632e+07
phenylpyruvate	N/A	N/A	N/A	N/A	N/A	N/A	6729.74	N/A	11906.1	11865.3	9810.41	8289.28	17620.5	N/A	N/A	N/A	N/A	13402.4
phosphoenolpyruvate	2.19111e+06	3.37131e+06	2.77996e+06	1.29785e+06	1.17782e+06	1.75723e+06	2.20555e+06	524979	1.29921e+06	2.62552e+06	1.47469e+06	2.25523e+06	4.06338e+06	2.51063e+06	3.51665e+06	4.55301e+06	3.92108e+06	4.9366e+06
Phosphorylcholine	1.72012e+08	2.09486e+08	2.00678e+08	1.3529e+08	1.29561e+08	1.59425e+08	2.86201e+08	1.96843e+08	2.58953e+08	3.16909e+08	3.31146e+08	3.07614e+08	2.47986e+08	2.13067e+08	2.53874e+08	2.44924e+08	2.44023e+08	2.64147e+08
prephenate	N/A	N/A	N/A	N/A	N/A	N/A	N/A	N/A	N/A	N/A	N/A	N/A	N/A	N/A	N/A	N/A	N/A	N/A
proline	1.24011e+08	1.30026e+08	1.26706e+08	1.14677e+08	1.07478e+08	1.28846e+08	1.11018e+08	1.11185e+08	1.24257e+08	1.09031e+08	1.10387e+08	1.17456e+08	1.13519e+08	1.27318e+08	1.12744e+08	1.12672e+08	1.20093e+08	1.10679e+08
propionyl-CoA-nega	N/A	N/A	N/A	N/A	N/A	N/A	N/A	N/A	N/A	N/A	N/A	N/A	N/A	N/A	N/A	N/A	N/A	N/A
propionyl-CoA-posi	21661.4	41417.9	34709.9	20199.8	19152.4	26401.8	61607.6	N/A	18635.4	50107.1	38310	24369.8	56429.1	22262.5	37263.7	55907.8	56954.6	48666.3
purine	123524	156293	215289	78483.6	57334.8	106312	501517	79629.8	189146	594307	628140	197754	282785	142308	359957	217062	229849	198253
putrescine	46560	20026.1	19259.3	22329.3	8427.69	162787	537007	295030	248114	325965	103096	1.04303e+06	418062	757023	644683	531993	152489	636587
Pyridoxamine	29426.6	35891.7	44886.8	15504	23037	18476.8	58774.5	19858.8	31158.9	32935	38674.2	38445.7	53168.6	55228.6	31388.6	34184.1	50037.2	86163.6
pyridoxine	9856.15	9551.68	N/A	N/A	N/A	N/A	N/A	N/A	11777.9	7466.57	N/A	N/A	N/A	N/A	N/A	18133.2	10154.1	17568.3
Pyroglutamic acid	159788	525825	167887	93191.4	82901.7	174911	811579	427754	506398	N/A	N/A	808912	267422	579326	303427	229742	N/A	907853
Pyrophosphate	173377	421157	273309	120817	126657	178882	709510	131833	434043	788405	646361	448835	210701	112295	199897	268087	254048	413843
pyruvate	163062	190763	183653	95291.7	116432	150725	277751	119172	216985	350848	293232	236334	229073	210822	268455	271031	232650	254577
quinolinate	5.44089e+06	6.20075e+06	5.84775e+06	3.07443e+06	3.15857e+06	4.60258e+06	7.18307e+06	1.92801e+06	3.80686e+06	5.89494e+06	4.51664e+06	3.8911e+06	6.73181e+06	4.83003e+06	5.08172e+06	7.62632e+06	8.27915e+06	8.57104e+06
riboflavin	1.15325e+06	2.19581e+06	1.72194e+06	648302	597280	1.27822e+06	1.84084e+06	263733	866124	3.36446e+06	2.96528e+06	1.5404e+06	1.94536e+06	976117	2.03469e+06	1.44573e+06	1.58731e+06	1.39292e+06
ribose-phosphate	678289	814538	747671	414543	460984	574210	2.0134e+06	576308	1.19854e+06	1.50984e+06	1.36338e+06	1.39111e+06	883744	592774	997524	1.58301e+06	1.6155e+06	2.2469e+06
S-adenosyl-L-homocysteine-nega	50156.8	57747.5	58494	22897.1	32422.4	53541	160751	36969.4	58466.5	151442	108796	65948.3	109765	52680.4	89378.8	70944.5	78729.7	73892
S-adenosyl-L-homoCysteine-posi	42940.2	77651.2	54720.7	33131.1	34696	57463.9	120706	53844.3	59018.6	98830.9	75138.9	69368.2	72224.6	34305.3	60106.8	49555	70408	53350.7
S-adenosyl-L-methioninamine	N/A	N/A	N/A	6177.23	N/A	N/A	N/A	N/A	N/A	13749.8	N/A	7517.68	N/A	N/A	N/A	N/A	N/A	N/A
S-adenosyl-L-methionine	1.46186e+06	3.23051e+06	3.00851e+06	1.0422e+06	858093	2.17587e+06	5.49786e+06	1.10405e+06	2.77916e+06	5.47622e+06	5.06971e+06	3.70448e+06	4.08227e+06	2.77578e+06	5.72696e+06	3.8778e+06	4.24871e+06	5.02637e+06
S-methyl-5-thioadenosine	8.18281e+06	1.72863e+07	1.00072e+07	4.69018e+06	4.17709e+06	7.17492e+06	2.25956e+07	4.45498e+06	1.2255e+07	2.50345e+07	2.87432e+07	1.47103e+07	2.66616e+07	1.31036e+07	N/A	1.98203e+07	1.62002e+07	N/A
S-ribosyl-L-homocysteine-nega	22223.5	12715.1	14997.1	N/A	N/A	36709.2	38380.7	33495.2	34178.4	23681.8	58327.1	19665.6	29736.7	41950.9	33594.3	22525.3	43407.5	29069.9
S-ribosyl-L-homocysteine-posi	21036	32214.7	22198	20562.4	8410.63	19323.4	56742.4	19171.8	46908.8	62113.3	24839.3	34321.3	23641.5	45390.6	29219.9	42274.9	58853.1	57355.9
sarcosine	1.8499e+06	2.39517e+06	2.56544e+06	1.54654e+06	1.54784e+06	2.90775e+06	1.02562e+07	3.17064e+06	6.3069e+06	8.95095e+06	8.90875e+06	6.13003e+06	3.07314e+06	2.58109e+06	4.059e+06	5.41618e+06	3.9236e+06	5.46956e+06
SBP	178592	190335	217661	75988.1	125911	152282	369661	131299	224049	271310	114766	254048	259402	121342	210519	323059	269136	353109
serine	9.70965e+06	1.25053e+07	1.07774e+07	6.88646e+06	6.18418e+06	1.00388e+07	1.76221e+07	7.61751e+06	1.07143e+07	1.55412e+07	1.76162e+07	1.37915e+07	1.70734e+07	1.26304e+07	1.58003e+07	2.08063e+07	1.73275e+07	2.0472e+07
shikimate	N/A	N/A	N/A	N/A	N/A	N/A	N/A	N/A	N/A	N/A	N/A	N/A	N/A	N/A	N/A	N/A	N/A	N/A
shikimate-3-phosphate	N/A	N/A	11815.9	N/A	N/A	N/A	36450.2	8530.34	35226.1	N/A	27425.8	N/A	N/A	N/A	N/A	56065.9	N/A	N/A
sn-glycerol-3-phosphate	3.94133e+07	5.08868e+07	3.83821e+07	2.54232e+07	2.33185e+07	3.62438e+07	8.08228e+07	3.10761e+07	5.53347e+07	6.58731e+07	4.56169e+07	5.87813e+07	5.88038e+07	4.35297e+07	6.25373e+07	7.69165e+07	6.83027e+07	7.41159e+07
spermidine	2.01613e+06	1.29059e+06	507960	1.30269e+06	1.02232e+06	1.08003e+06	1.83098e+06	1.49562e+06	733048	562623	457610	477755	469266	425592	333362	257045	279499	303925
spermine	23718.5	N/A	15561.8	30084.7	13428.5	N/A	N/A	18226.2	32021.2	8209.59	N/A	N/A	N/A	12916.3	N/A	8408.53	13172.9	9632.86
succinate	8.87791e+06	8.85085e+06	8.45152e+06	4.98337e+06	4.84495e+06	7.41212e+06	3.43215e+07	1.29363e+07	2.16531e+07	1.95719e+07	2.12959e+07	1.22791e+07	2.04897e+07	1.32605e+07	2.01655e+07	1.86016e+07	1.77634e+07	1.6654e+07
succinyl-CoA-methylmalonyl-CoA-nega	N/A	N/A	N/A	N/A	N/A	N/A	N/A	N/A	N/A	N/A	N/A	N/A	N/A	N/A	N/A	N/A	N/A	N/A
succinyl-CoA-posi	21226.1	16438.3	30543	15012.3	13459.1	22777.8	49770.1	16565.2	24332.1	67296	53440.5	29004.3	22476.5	23318.1	15349.6	49694.8	25367.3	34995.3
taurine	6.07952e+06	1.02603e+07	7.02798e+06	4.36674e+06	3.67139e+06	6.38923e+06	1.97648e+07	5.68863e+06	9.05801e+06	2.2207e+07	2.27542e+07	1.04688e+07	1.35045e+07	8.62769e+06	1.31341e+07	1.12227e+07	1.39401e+07	1.12127e+07
Taurodeoxycholic acid	6210.85	N/A	N/A	N/A	N/A	5181.96	N/A	N/A	6206.69	N/A	N/A	N/A	N/A	N/A	N/A	N/A	7539.62	N/A
thiamine	N/A	N/A	N/A	N/A	N/A	N/A	N/A	N/A	N/A	N/A	N/A	N/A	N/A	N/A	N/A	N/A	N/A	N/A
Thiamine pyrophosphate	129628	211764	209266	87753.8	130015	101100	259275	78029	139006	283674	198521	165532	148980	80713.1	105936	268622	270975	224708
thiamine-phosphate	33647.8	53263.4	64448	22779.2	30544.4	25868.8	93057.9	8713.07	29093.2	48616.7	45786.8	42429.8	44735.7	50214.6	41414.2	69933.6	54284.5	37288.9
threonine	8.11218e+06	6.21784e+06	7.85459e+06	3.8556e+06	4.11827e+06	6.67301e+06	1.70307e+07	4.85613e+06	8.89539e+06	1.50479e+07	7.45031e+06	1.09955e+07	7.30508e+06	5.26712e+06	6.22774e+06	1.21593e+07	1.09017e+07	1.38298e+07
thymidine	15821.6	38093.9	18554.9	N/A	N/A	13277	N/A	N/A	24779.5	19207.8	N/A	14080.3	18154.7	16059	21588.1	26166.3	15585.7	10502
thymine	5185.07	21463.2	12403.6	12662.1	N/A	12485.6	17262.9	7009.08	16341.5	7369.66	20545.8	N/A	8143.86	7253.57	5888.19	15531.3	7378.52	N/A
trans, trans-farnesyl diphosphate	46298.6	64212.1	57635	22222.8	38827.6	36371.2	80248.6	31051.1	49408.6	77182.5	63551.8	55429.3	65575.6	32875.9	47857	55597.2	56828.6	83721.1
trehalose-6-Phosphate	1.07919e+06	1.26705e+06	1.17358e+06	537327	571548	741213	2.73588e+06	433060	1.04011e+06	2.58275e+06	2.48655e+06	1.5029e+06	2.12302e+06	1.19296e+06	1.71712e+06	1.67439e+06	1.91837e+06	1.71286e+06
trehalose-sucrose	9.47667e+07	1.0949e+08	1.03502e+08	7.04649e+07	6.88816e+07	8.63248e+07	1.28508e+08	6.62157e+07	1.07503e+08	1.27994e+08	1.18254e+08	1.06126e+08	1.28084e+08	1.0505e+08	1.18473e+08	1.2508e+08	1.24014e+08	1.23772e+08
tryptophan	1.71268e+06	2.41741e+06	2.02952e+06	1.23056e+06	1.54292e+06	2.36106e+06	7.43089e+06	3.67489e+06	4.654e+06	9.45597e+06	1.0356e+07	7.09446e+06	4.39413e+06	3.04211e+06	4.32883e+06	3.53664e+06	3.51219e+06	4.03895e+06
tyrosine	1.76944e+07	2.42414e+07	2.48951e+07	1.16746e+07	1.05275e+07	1.3663e+07	4.09616e+07	9.59175e+06	1.50977e+07	3.31851e+07	4.19252e+07	1.69053e+07	2.30289e+07	1.91261e+07	3.43528e+07	1.76437e+07	2.07955e+07	1.4941e+07
UDP-D-glucose	1.61506e+06	2.46723e+06	2.40969e+06	1.16893e+06	1.0013e+06	1.69359e+06	2.29424e+06	525363	977323	2.31644e+06	2.10398e+06	1.50381e+06	3.85217e+06	2.31643e+06	3.76984e+06	2.94522e+06	3.18691e+06	2.6076e+06
UDP-D-glucuronate	24331.2	39864.2	30025.5	19153.2	12937.7	27436.5	51252.1	12426.1	26400.5	47628.7	46061.9	32614.7	40898.8	18115	41932.5	48142.6	35720.5	27434.8
UDP-N-acetyl-glucosamine	616596	982573	839853	363998	333420	563183	1.54988e+06	254693	643494	1.38477e+06	1.5722e+06	786884	1.28397e+06	962364	1.25795e+06	1.08468e+06	1.01207e+06	956222
UDP-nega	541002	967674	780878	361070	352924	491291	1.03274e+06	246367	393220	1.02238e+06	1.40464e+06	702322	834594	702427	1.13958e+06	816473	727922	724403
UMP	253483	150279	179225	111899	118629	286404	177516	360101	613442	271818	566121	281646	256199	206175	230027	265108	228170	226619
uracil	513457	768213	671919	456084	349277	575397	4.95087e+06	615384	1.71504e+06	3.31995e+06	3.74554e+06	1.24766e+06	823727	424889	1.15757e+06	879308	1.2586e+06	1.33472e+06
Urea	143027	338394	238008	77295.1	61219.4	117853	529945	79388.5	121473	485178	429548	282382	274110	223901	297116	372016	377288	361853
Uric acid	9.54381e+06	1.32682e+07	1.36748e+07	6.36257e+06	4.96809e+06	8.27899e+06	9.42277e+06	577306	1.20516e+06	2.71688e+06	6.72683e+06	1.368e+06	1.39497e+07	9.48019e+06	2.3884e+07	9.47617e+06	8.43524e+06	6.64776e+06
uridine	518699	769523	826783	409735	296467	756685	4.08141e+06	756786	2.23893e+06	2.04566e+06	2.51475e+06	1.09843e+06	1.62333e+06	931338	1.74233e+06	1.14543e+06	1.57347e+06	1.43678e+06
UTP-nega	2.32093e+06	4.02002e+06	3.82833e+06	1.51695e+06	1.64613e+06	2.64127e+06	3.35548e+06	463120	877491	4.19641e+06	3.55715e+06	2.25931e+06	2.33509e+06	2.26088e+06	2.86163e+06	2.16534e+06	2.18539e+06	2.15308e+06
valine	517557	602683	548502	209528	235518	505169	1.82145e+06	413292	768434	1.23707e+06	1.55046e+06	737021	802255	621090	768161	956408	1.00962e+06	1.11418e+06
xanthine	581324	1.22886e+06	890741	514134	466292	719950	1.53073e+06	322719	532808	813010	786671	357284	1.2371e+06	966090	2.26929e+06	1.25526e+06	926898	778231
xanthosine	151423	276269	250346	89535	81925.2	154283	353201	81398.5	148492	362222	360661	157897	345864	145826	299707	194230	250897	200162
xanthosine-5-phosphate	N/A	N/A	N/A	N/A	N/A	N/A	N/A	N/A	N/A	N/A	N/A	N/A	N/A	N/A	N/A	N/A	N/A	N/A
Xanthurenic acid	630315	1.5224e+06	1.27174e+06	442511	452430	844573	1.8905e+06	304028	680247	2.08301e+06	1.37124e+06	1.34027e+06	304758	140019	362751	N/A	127484	217487
