# Supplementary material for: E2F/Dp inactivation in fat body cells triggers systemic metabolic changes
Source: eLife. 2021 Jul 12;10:e67753. doi: 10.7554/eLife.67753 (PMC8298092; doi:10.7554/eLife.67753)
Supplement: Supplementary file 6. — Third instar larval Dp-/- mutant and controls, Canton-S and w1118, were profiled by liquid chromatography tandem mass spectrometry (LC-MS/MS). Data were normalized, median centered by metabolite, and scaled. Only metabolites that were significantly altered in the Dp-/- mutant when compared to both the Canton S and w1118 genotypes are displayed. [file elife-67753-supp6.xls]

## Sheet: Legend
Normalized values for only significantly altered metabolites between Dp mutant and 2 controls, Canton-S and w[1118]
Third instar larval Dp mutant and controls, Canton-S and w[1118], were profiled by LC MSMS
Data were normalized, median centered by metabolite and scaled.
Only metabolites that were significantly altered in the DP mutant when compared to both the Canton S and w[1118] genotypes are displayed

## Sheet: Metabolomics
Label	Canton S	Canton S	Canton S	Canton S	Canton S	Canton S	DP mutant	DP mutant	DP mutant	DP mutant	DP mutant	DP mutant	w[1118]	w[1118]	w[1118]	w[1118]	w[1118]	w[1118]
1-Methyl-Histidine	0.50711	0.0903471	0.47467	0.190019	0.744853	0.538805	-1.76067	-1.43742	-1.12708	-1.22733	-0.0661785	-1.06026	1.115	1.29635	1.89867	-0.154394	0.033709	-0.0562038
1-Methyladenosine	1.18782	1.41776	1.46595	0.788542	1.10353	1.62222	-0.207785	-0.745098	-0.694775	0.106385	0.236087	-0.525571	-1.00142	-0.969845	-0.886865	-0.981271	-0.899679	-1.01598
2-dehydro-D-gluconate	-0.176903	-0.384223	0.655429	1.00965	-0.319313	0.750857	-1.44836	-1.60701	-0.781053	-0.867307	-1.23094	-0.713463	0.0717213	1.5305	0.786826	1.36516	0.0133981	1.34504
2-deoxyglucose-6-phosphate	-1.19917	-0.620114	-0.582941	-1.50609	-1.62681	-0.751523	0.232472	-1.17572	0.0859923	0.741136	1.10798	0.829525	1.24932	-0.543799	0.804243	0.878444	1.13117	0.945896
2-Hydroxy-2-methylbutanedioic acid	-0.907738	-0.946524	-0.751787	-0.294236	-0.0181924	0.129665	0.472055	0.707576	1.41497	1.86029	1.68982	1.23124	-1.30136	-0.921118	-0.360163	-0.689944	-0.801615	-0.512936
2-hydroxygluterate	-0.979229	-0.850131	-0.637031	-0.585801	-0.341294	-0.0239243	0.560303	0.191829	1.05821	2.09889	1.84702	1.50638	-0.98133	-0.890309	-0.210576	-0.696935	-0.677667	-0.388407
2-ketohaxanoic acid	-0.880553	-0.901114	-0.701846	-0.418675	-0.192998	0.149071	0.601262	0.519298	1.17184	1.95703	1.90742	1.28078	-1.02497	-0.898366	-0.458384	-0.717146	-0.797544	-0.595111
2-oxobutanoate	-0.229984	-1.3619	-0.328444	0.590055	0.993454	0.38545	-0.25853	0.979854	1.08204	1.47028	1.3444	1.2088	-0.863524	-1.06011	-0.738939	-1.15263	-1.086	-0.974277
2,3-Diphosphoglyceric acid	0.4863	0.90478	1.23249	0.959256	2.15133	0.16427	-1.14337	-1.61012	-0.936364	-1.09836	-1.04901	-1.0393	0.323596	-0.195714	0.406349	-0.300956	0.298622	0.446206
3-phospho-serine	0.65504	0.276606	0.486181	1.0176	0.773478	0.150848	-1.51817	-0.941457	-1.25596	-1.44326	-1.5631	-0.711491	1.02537	1.27837	1.16981	0.80535	-0.298446	0.093217
3-phosphoglycerate	0.440902	0.37495	0.401227	0.139308	0.366214	-0.00956685	-1.35744	-1.53757	-0.952114	-1.26979	-1.63985	-0.47689	1.12214	0.175957	0.394069	1.51785	0.774864	1.53574
4-Pyridoxic acid	0.55419	0.655172	1.79172	0.919201	1.36027	-0.130775	-1.22721	-1.39503	-1.33369	-0.808866	-0.384925	-0.825529	0.250742	0.49839	1.56534	-0.680517	-0.210994	-0.597488
7-methylguanosine	0.111204	1.50465	0.940546	0.950479	0.0737108	1.18806	-1.33528	-1.65118	-1.00574	-0.407376	-0.510064	-1.77721	1.03209	0.326808	1.04694	-0.290598	0.0451344	-0.242173
acetoacetate	-0.204688	-1.4017	-0.157126	0.53774	1.05695	0.380917	-0.219671	0.704276	1.15761	1.52927	1.30436	1.2507	-1.02828	-1.08059	-0.828354	-0.962713	-1.09838	-0.940304
aconitate	0.870475	-0.132497	-0.413232	1.209	0.781855	0.163272	-1.88943	-0.327852	-0.883347	-1.26599	-1.54401	-0.909539	1.49421	1.35349	0.569838	0.377547	0.24461	0.301594
alanine	-1.40926	-1.43661	-1.18995	-0.171208	-0.387908	0.160638	0.600201	1.58204	1.50624	1.04237	1.27585	0.735122	-1.12307	-0.593202	-0.218787	-0.150604	-0.896307	0.674458
allantoate	-0.218367	-0.691869	-0.668233	-0.761604	-0.168193	-0.712991	-0.280219	-0.316936	0.245518	2.65992	1.24476	2.16808	-0.0261847	-0.489879	-0.709622	-0.624615	-0.306594	-0.342972
allantoin	-0.848184	-0.895238	-0.950866	-1.08186	-1.04171	-1.07766	-0.474655	-0.826099	-0.547524	0.554922	-0.0479523	0.301432	1.33142	0.496667	0.428196	1.61504	1.38357	1.6805
arginine	-1.06137	-0.887376	-0.473058	-1.08035	-0.357078	-1.25949	0.947193	0.200517	1.1017	1.33554	2.3785	0.434397	0.420432	-0.458193	0.714296	-0.777544	-0.639394	-0.538728
Ascorbic acid	-0.722045	-0.385029	-0.449385	-1.01492	-0.929109	-0.738743	-0.0866483	-0.342338	0.369341	2.24846	2.65026	0.570556	-0.0388607	-0.752499	0.381308	-0.376282	0.0256997	-0.409765
asparagine	0.0764308	-1.17305	0.319222	-0.0491207	1.55612	0.367706	-2.16975	-1.10212	-0.902393	-1.29594	-0.0227133	0.0835474	1.14872	1.42037	0.647218	0.798684	-0.0698454	0.366917
aspartate	0.574528	0.542075	0.309854	0.584746	0.705674	-0.103922	-1.33362	-1.18113	-1.49844	-1.21167	-1.38312	-1.02599	1.45181	1.10376	1.3527	0.310585	0.43671	0.365467
ATP	0.540548	0.849615	1.76108	1.06691	1.48614	1.40905	-0.947121	-1.56961	-1.28302	-0.113851	-0.58228	-0.183559	0.0993336	0.0285344	-0.110314	-0.979769	-0.952587	-0.519092
biotin	1.80255	-0.0151852	1.11057	0.960604	1.17573	0.64935	-1.38292	-1.00953	1.36723	-1.24466	-0.998571	-0.570428	0.614718	0.0465363	-0.331294	-0.909706	-0.645461	-0.619525
Carbamoyl phosphate	0.318282	0.860891	0.477531	0.740735	0.427365	0.570973	-2.07193	-1.66514	-1.19147	-1.14366	-1.11796	0.613619	1.15208	0.585772	1.32027	-0.0213423	0.190975	-0.0469885
cyclic-AMP	0.190247	0.796722	0.594307	-0.706535	-0.181432	0.277082	-1.32284	-2.20807	-0.970548	0.342272	-0.968462	-0.853902	1.46892	-0.174686	1.02032	0.815069	1.36004	0.521494
D-glyceraldehdye-3-phosphate	0.313117	0.309942	0.549713	0.142971	0.601019	-0.0335161	-1.94061	-1.07598	-0.548662	-0.930125	-2.23354	0.432681	0.491001	1.04802	-0.278652	0.763345	1.21776	1.17152
deoxyguanosine	-0.209091	-0.241538	-0.120132	-0.443271	-0.410695	-0.330001	0.311562	-0.131482	0.451366	2.68042	2.20922	0.766424	-0.658163	-0.810149	-0.734851	-0.767579	-0.782501	-0.779532
deoxyinosine	-0.641999	-0.159772	-0.324515	-0.690341	-1.31514	-0.589188	0.314885	-0.0696704	0.416135	3.19204	1.51126	0.434424	-0.201483	-0.644562	-0.234836	-0.099335	-0.306445	-0.591458
dihydroorotate	-0.270694	-0.912337	-0.769814	-0.548318	-0.162785	-0.986505	-0.322881	1.73818	1.2912	1.73828	0.0683738	2.02523	-0.055417	0.0542905	-1.07725	-0.576645	-0.512031	-0.720872
dimethylglycine	0.90026	0.574125	0.666749	0.640753	1.81191	0.764506	-0.657192	-0.406836	-0.405723	-1.7384	-2.30223	-0.77483	-0.320405	-0.37358	0.00178054	0.335194	0.271936	1.01198
glutamate	1.0483	-0.116939	0.337033	1.57875	0.768587	0.804297	-1.80729	-0.777895	-1.21084	-1.34022	-1.09418	-1.00353	1.00194	1.13992	0.569225	0.236586	0.0151653	-0.148908
glycerate	0.324011	0.0951373	1.0311	-0.119189	0.959679	0.716606	-1.50419	-1.01266	-0.449269	0.422975	-2.25698	-0.292497	0.7206	-0.821306	1.80264	0.938286	-0.432574	-0.122367
guanine	1.27876	0.91333	1.07078	1.18939	0.838581	1.34527	-0.221349	-0.273223	0.145631	0.518423	0.575458	-0.167149	-1.11858	-1.19188	-1.22296	-1.24647	-1.20308	-1.23093
Hydroxyphenylacetic acid	0.487538	0.757856	0.200525	-0.435483	-0.903996	-0.715197	-1.164	-0.491787	-0.418684	-1.01976	-1.43854	-1.22307	2.11905	0.673808	0.68862	1.1038	1.01653	0.762792
IMP	-0.593648	-0.84792	-0.716702	-0.788315	-0.5592	-0.253659	-0.0191123	2.09369	2.72093	0.0310846	1.05707	0.472101	-0.589858	-0.619855	-0.116749	-0.476308	-0.383319	-0.410229
Kynurenic acid	0.989975	0.352988	1.33776	1.34507	0.555696	1.28052	0.195216	-0.0240951	0.377226	-0.310591	1.19899	-0.84536	-0.330875	-1.51281	-1.17332	-1.37154	-0.776801	-1.28804
Kynurenine	-0.280719	-0.224868	-0.163532	-0.414701	-0.395186	-0.214504	1.5805	0.1594	0.387163	2.32531	1.8804	0.567749	-0.900939	-0.913724	-0.803129	-0.807323	-0.901159	-0.880733
lactate	-0.737192	-0.668897	-0.662453	-0.734239	-0.728082	-0.401449	1.58902	0.86877	1.59309	1.56644	1.45609	0.941425	-0.828521	-0.8431	-0.212716	-0.808929	-0.702789	-0.686466
myo-inositol	1.84792	0.622629	0.486889	0.0166032	1.15598	-0.0666836	-0.686092	-0.82266	-0.953227	-1.14382	-2.09752	-0.704645	0.609479	-0.678579	-0.156621	1.16375	0.421493	0.985116
N-acetyl-glucosamine	-0.643536	-0.686299	-0.613548	-0.687181	-0.525448	-0.607792	1.86159	2.09698	1.41659	-0.279316	-0.586451	1.78919	-0.357192	-0.613881	-0.387457	-0.37226	-0.478362	-0.325623
N-carbamoyl-L-aspartate	-0.216539	-0.483132	-0.593332	-0.557783	-0.281789	-1.01053	-0.0303854	-0.284767	0.603226	3.10476	0.9424	1.61976	-0.461217	-0.482659	-0.626771	-0.369479	-0.392387	-0.479376
NAD	0.384867	-0.639186	1.05997	0.0700271	1.288	1.07891	-1.74634	-1.13779	-1.06323	-1.08635	-0.475253	-0.533072	1.04509	1.65332	1.07983	-0.362248	-0.224633	-0.391914
nicotinamide	0.0225909	0.684175	0.638905	-0.661777	-0.640289	-0.169233	-0.955587	-1.70027	-1.33806	-0.329376	-0.740765	-1.04959	1.35619	0.467922	1.9261	0.863148	0.983831	0.642085
orotate	0.060623	-0.686927	0.272368	-0.0154295	-0.253285	-0.141238	-1.70889	-0.883927	-1.381	-0.685291	-1.06784	0.055186	2.29533	1.07192	1.28757	0.570544	0.531397	0.678882
phosphoenolpyruvate	0.430574	0.538221	0.605709	0.00514524	0.0431369	-0.0759574	-1.47851	-1.6123	-1.23249	-0.897821	-1.53765	-0.556154	1.41442	0.552529	0.705214	1.21159	0.542431	1.34191
propionyl-CoA	-0.335134	0.384202	0.509355	0.525123	0.728599	0.303658	-0.388579	-2.49211	-1.27083	-0.204452	-0.691977	-1.02389	1.85385	-0.498677	0.0953261	1.09663	0.975198	0.433689
quinolinate	1.32879	0.2095	0.836292	0.43631	1.02336	0.710559	-1.30423	-1.35136	-1.04448	-1.11756	-1.55528	-1.27605	0.807374	0.398151	-0.42413	0.628902	0.763699	0.930169
sarcosine	-1.25467	-1.5139	-0.932187	-0.836154	-0.542851	0.00609641	0.590798	1.08335	1.74605	1.18822	1.45639	1.0467	-0.85294	-0.708629	-0.246756	0.343162	-0.785767	0.213088
serine	0.00850458	-0.713286	-0.388658	0.134001	0.159721	0.366941	-2.04368	-0.07876	-1.0773	-1.47669	-0.65255	-0.462714	1.47078	1.00665	0.605469	1.68608	0.202012	1.25348
tryptophan	-1.05624	-1.1328	-1.07192	-0.99929	-0.345032	-0.396393	-0.283536	1.59566	0.469752	1.31433	1.96928	1.55412	0.275779	-0.0921091	0.0772332	-0.649348	-0.758609	-0.470879
UDP-D-glucose	0.0841458	0.162655	0.741226	0.201223	0.0850778	0.299452	-1.27868	-1.49393	-1.4102	-0.842089	-0.899042	-0.984792	2.00191	0.894526	1.65988	0.383449	0.47037	-0.0751799
uracil	-0.751785	-0.741961	-0.640545	-0.416459	-0.635395	-0.566953	2.01207	-0.151582	0.948223	1.56384	2.27056	-0.0801133	-0.56515	-1.04712	-0.111637	-0.698675	-0.248271	-0.139041
Uric acid	0.721364	0.582724	1.15407	0.636972	0.369883	0.488746	-0.728541	-1.30787	-1.27312	-1.19008	-0.724606	-1.27199	0.83924	0.50862	2.2714	-0.144641	-0.348424	-0.583759
xanthine	-0.240961	0.583281	0.302916	0.294215	0.330341	0.295753	-0.423498	-0.830588	-0.890313	-0.947147	-0.909554	-1.41487	0.796029	0.751074	2.98394	0.374614	-0.386359	-0.668879
