# Supplementary material for: E2F/Dp inactivation in fat body cells triggers systemic metabolic changes
Source: eLife. 2021 Jul 12;10:e67753. doi: 10.7554/eLife.67753 (PMC8298092; doi:10.7554/eLife.67753)
Supplement: Supplementary file 7. — Enrichment analysis of the KEGG metabolic pathways. [file elife-67753-supp7.xls]

## Sheet: Legend
Overrepresented KEGG pathways from altered metabolites in Dp mutant
Enrichment analysis of the KEGG metabolic pathways

## Sheet: Metabolites Up in Dp mutant
Overrepresented KEGG Pathway	total	expected	hits	Raw p	Holm p	FDR
PYRIMIDINE METABOLISM	36	0.873	3	0.0522	1	1
PROTEIN BIOSYNTHESIS	19	0.461	2	0.0746	1	1
PURINE METABOLISM	45	1.09	3	0.0902	1	1
GLYCINE, SERINE AND THREONINE METABOLISM	26	0.63	2	0.128	1	1
TRYPTOPHAN METABOLISM	34	0.824	2	0.198	1	1
BUTYRATE METABOLISM	9	0.218	1	0.199	1	1
KETONE BODY METABOLISM	10	0.242	1	0.219	1	1
ASPARTATE METABOLISM	12	0.291	1	0.257	1	1
BETA-ALANINE METABOLISM	13	0.315	1	0.275	1	1
PHENYLALANINE AND TYROSINE METABOLISM	13	0.315	1	0.275	1	1
AMINO SUGAR METABOLISM	15	0.364	1	0.31	1	1
UREA CYCLE	20	0.485	1	0.391	1	1
PYRUVATE METABOLISM	20	0.485	1	0.391	1	1
METHIONINE METABOLISM	24	0.582	1	0.45	1	1
ARGININE AND PROLINE METABOLISM	26	0.63	1	0.477	1	1
GLUCONEOGENESIS	27	0.655	1	0.49	1	1
VALINE, LEUCINE AND ISOLEUCINE DEGRADATION	36	0.873	1	0.595	1	1
TYROSINE METABOLISM	38	0.921	1	0.615	1	1

## Sheet: Metabolites Down in Dp mutant
Overrepresented KEGG Pathway	total	expected	hits	Raw p	Holm p	FDR
AMMONIA RECYCLING	18	0.764	6	4.84e-05	0.00387	0.00387
GLYCOLYSIS	21	0.891	6	0.000129	0.0102	0.00515
GLUCONEOGENESIS	27	1.15	6	0.000583	0.0455	0.0156
NICOTINATE AND NICOTINAMIDE METABOLISM	13	0.552	3	0.0149	1	0.299
GLYCINE, SERINE AND THREONINE METABOLISM	26	1.1	4	0.0209	1	0.299
MITOCHONDRIAL ELECTRON TRANSPORT CHAIN	15	0.636	3	0.0224	1	0.299
GLUTAMATE METABOLISM	18	0.764	3	0.0369	1	0.371
GLYCEROL PHOSPHATE SHUTTLE	8	0.339	2	0.0417	1	0.371
MALATE-ASPARTATE SHUTTLE	8	0.339	2	0.0417	1	0.371
UREA CYCLE	20	0.848	3	0.0486	1	0.389
CITRIC ACID CYCLE	23	0.976	3	0.0692	1	0.503
METHIONINE METABOLISM	24	1.02	3	0.0768	1	0.512
ASPARTATE METABOLISM	12	0.509	2	0.0884	1	0.544
GLYCEROLIPID METABOLISM	13	0.552	2	0.102	1	0.581
PURINE METABOLISM	45	1.91	4	0.117	1	0.625
BIOTIN METABOLISM	4	0.17	1	0.159	1	0.679
INTRACELLULAR SIGNALLING THROUGH FSH RECEPTOR AND FOLLICLE STIMULATING HORMONE | INTRACELLULAR SIGNALLING THROUGH LHCGR RECEPTOR AND LUTEINIZING HORMONE/CHORIOGONADOTROPIN	4	0.17	1	0.159	1	0.679
PROTEIN BIOSYNTHESIS	19	0.806	2	0.191	1	0.679
EXCITATORY NEURAL SIGNALLING THROUGH 5-HTR 4 AND SEROTONIN | EXCITATORY NEURAL SIGNALLING THROUGH 5-HTR 7 AND SEROTONIN | EXCITATORY NEURAL SIGNALLING THROUGH 5-HTR 6 AND SEROTONIN	5	0.212	1	0.195	1	0.679
CORTICOTROPIN ACTIVATION OF CORTISOL PRODUCTION	5	0.212	1	0.195	1	0.679
VASOPRESSIN REGULATION OF WATER HOMEOSTASIS	5	0.212	1	0.195	1	0.679
INTRACELLULAR SIGNALLING THROUGH HISTAMINE H2 RECEPTOR AND HISTAMINE	5	0.212	1	0.195	1	0.679
INTRACELLULAR SIGNALLING THROUGH PGD2 RECEPTOR AND PROSTAGLANDIN D2	5	0.212	1	0.195	1	0.679
INTRACELLULAR SIGNALLING THROUGH PROSTACYCLIN RECEPTOR AND PROSTACYCLIN	6	0.255	1	0.23	1	0.766
INTRACELLULAR SIGNALLING THROUGH ADENOSINE RECEPTOR A2A AND ADENOSINE | INTRACELLULAR SIGNALLING THROUGH ADENOSINE RECEPTOR A2B AND ADENOSINE	7	0.297	1	0.263	1	0.84
GALACTOSE METABOLISM	25	1.06	2	0.287	1	0.883
ARGININE AND PROLINE METABOLISM	26	1.1	2	0.303	1	0.883
NUCLEOTIDE SUGARS METABOLISM	9	0.382	1	0.324	1	0.883
RNA TRANSCRIPTION	9	0.382	1	0.324	1	0.883
VITAMIN B6 METABOLISM	10	0.424	1	0.353	1	0.883
KETONE BODY METABOLISM	10	0.424	1	0.353	1	0.883
BETAINE METABOLISM	10	0.424	1	0.353	1	0.883
HISTIDINE METABOLISM	11	0.467	1	0.381	1	0.924
GLUCOSE-ALANINE CYCLE	12	0.509	1	0.408	1	0.939
TRYPTOPHAN METABOLISM	34	1.44	2	0.429	1	0.939
BETA-ALANINE METABOLISM	13	0.552	1	0.433	1	0.939
OXIDATION OF BRANCHED CHAIN FATTY ACIDS	14	0.594	1	0.458	1	0.939
STARCH AND SUCROSE METABOLISM	14	0.594	1	0.458	1	0.939
PYRIMIDINE METABOLISM	36	1.53	2	0.459	1	0.939
SPHINGOLIPID METABOLISM	15	0.636	1	0.481	1	0.939
AMINO SUGAR METABOLISM	15	0.636	1	0.481	1	0.939
PROPANOATE METABOLISM	18	0.764	1	0.546	1	0.983
PENTOSE PHOSPHATE PATHWAY	18	0.764	1	0.546	1	0.983
FRUCTOSE AND MANNOSE DEGRADATION	18	0.764	1	0.546	1	0.983
INOSITOL METABOLISM	19	0.806	1	0.565	1	0.983
INSULIN SIGNALLING	19	0.806	1	0.565	1	0.983
PYRUVATE METABOLISM	20	0.848	1	0.584	1	0.994
VALINE, LEUCINE AND ISOLEUCINE DEGRADATION	36	1.53	1	0.797	1	1
