# Supplementary material for: E2F/Dp inactivation in fat body cells triggers systemic metabolic changes
Source: eLife. 2021 Jul 12;10:e67753. doi: 10.7554/eLife.67753 (PMC8298092; doi:10.7554/eLife.67753)
Supplement: Supplementary file 8. [file elife-67753-supp8.xls]

## Sheet: Legend
Fly food medium composition
Semi-defined fly food was adapted from Lee and Micchell 2013

## Sheet: Food composition
Amount per Liter		control diet	12% carbohydrate	16 % carbohydrate	24 % carbohydrate	0.04 % fat	1 % fat	2.5 % fat	5 % fat	0.9 % protein	6.3 % protein			Carbohydrate in content**	Protein in content**	Fat in content**
Agar (g)		10	10	10	10	10	10	10	10	10	10
Yeast g)		43.5	43.5	43.5	43.5	43.5	43.5	43.5	43.5	10	140			0	0.45	0.01
Sucrose (g)		79	120	160	240	79	79	79	79	79	79			1	0	0
Lecithin (g)		0.4	0.4	0.4	0.4	0	10	25	50	0.4	0			0	0	1
Propionic acid (ml)		5	5	5	5	5	5	5	5	5	5
														** Nutrition facts are supplied information by manufactories
Calculated weight of ingredient per liter
Carbohydrates (g)		79	120	160	240	79	79	79	79	79	79
Proteins (g)		19.575	19.575	19.575	19.575	19.575	19.575	19.575	19.575	4.5	63
Lipids (g)		0.835	0.835	0.835	0.835	0.435	10.435	25.435	50.435	0.5	1.4
Calculated weight of ingredient % (g/100g)
Carbohydrates (%)		7.9	12	16	24	7.9	7.9	7.9	7.9	7.9	7.9
Proteins (%)		1.9575	1.9575	1.9575	1.9575	1.9575	1.9575	1.9575	1.9575	0.45	6.3
Lipids (%)		0.0835	0.0835	0.0835	0.0835	0.0435	1.0435	2.5435	5.0435	0.05	0.14

## Sheet: Providers
Chemical	Distributor	Catalog number
sucrose, FCC Food grade	MP Biomedicals	904713
Brewers yeast	MP Biomedicals	2903312
lecithin, soybean	MP Biomedicals	102147
Agar	Lab scientific	Fly 8020
